# Supplementary material for: Multi-omics analyses demonstrate a critical role for EHMT1 methyltransferase in transcriptional repression during oogenesis
Source: Genome Res. 2023 Jan;33(1):18–31. doi: 10.1101/gr.277046.122 (PMC9977154; doi:10.1101/gr.277046.122)
Supplement: Supplemental Material [file supp_gr.277046.122_Supplemental_Table_S1.xlsx]

## Sheet: H3K9me2_enriched_domains
Supplemental Table S1: H3K9me2 enriched domains (ChIP-seq) showing the genomic location (A-D), Overlapping Gene information (E-I), average enrichment levels (RPKM) of two biological replicate samples for each sample type (J-O).
Probe	Chromosome	Start	End	Gene	ID	Description	Gene Orientation	Probe distance from gene	d25 GV H3K9me2	d15 GV H3K9me2	Control GV H3K9me2	G9a KO GV H3K9me2	G9a-Glp DKO GV H3K9me2	Control GV IgG
Chr1:4520001-4530000	1	4520001	4530000	AC129937.1	ENSMUSG00000096126	No description	overlapping	0	0.65091	0.525757	0.411834	0.30554	0.526847	0.352425
Chr1:6410001-6420000	1	6410001	6420000	null			Not found	0	0.611637	0.463648	0.52458	1.25971	0.589775	0.221834
Chr1:9620001-9650000	1	9620001	9650000	2610203C22Rik	ENSMUSG00000079671	RIKEN cDNA 2610203C22 gene [Source:MGI Symbol;Acc:MGI:1919731]	overlapping	0	0.581584	0.607485	0.577855	0.350824	0.470445	0.349441
Chr1:11320001-11330000	1	11320001	11330000	null			Not found	0	0.572365	0.419917	0.472313	0.29739	0.338413	0.386415
Chr1:11550001-11560000	1	11550001	11560000	A830018L16Rik	ENSMUSG00000057715	RIKEN cDNA A830018L16 gene [Source:MGI Symbol;Acc:MGI:2444149]	overlapping	0	0.60583	0.518877	0.567907	0.728778	0.66459	0.314851
Chr1:12710001-12740000	1	12710001	12740000	Sulf1	ENSMUSG00000016918	sulfatase 1 [Source:MGI Symbol;Acc:MGI:2138563]	overlapping	0	0.614358	0.44062	0.416187	0.383799	0.373839	0.474671
Chr1:12800001-12810000	1	12800001	12810000	Sulf1	ENSMUSG00000016918	sulfatase 1 [Source:MGI Symbol;Acc:MGI:2138563]	overlapping	0	0.609702	0.442914	0.372635	0.477084	0.476155	0.610041
Chr1:12830001-12860000	1	12830001	12860000	Sulf1	ENSMUSG00000016918	sulfatase 1 [Source:MGI Symbol;Acc:MGI:2138563]	overlapping	0	0.549409	0.594384	0.484514	0.671391	0.500278	0.386421
Chr1:12940001-13000000	1	12940001	13000000	Slco5a1	ENSMUSG00000025938	solute carrier organic anion transporter family, member 5A1 [Source:MGI Symbol;Acc:MGI:2443431]	overlapping	0	0.552522	0.514062	0.474366	0.388286	0.442652	0.314261
Chr1:13050001-13070000	1	13050001	13070000	Dppa5b	ENSMUSG00000069620	developmental pluripotency associated 5B [Source:MGI Symbol;Acc:MGI:3765340]	overlapping	0	0.613782	0.49244	0.422095	0.526236	0.457976	0.274615
Chr1:13110001-13120000	1	13110001	13120000	Prdm14	ENSMUSG00000042414	PR domain containing 14 [Source:MGI Symbol;Acc:MGI:3588194]	overlapping	0	0.64676	0.605066	0.489861	0.170925	0.352747	0.193212
Chr1:13150001-13160000	1	13150001	13160000	Ncoa2	ENSMUSG00000005886	nuclear receptor coactivator 2 [Source:MGI Symbol;Acc:MGI:1276533]	overlapping	0	0.584398	0.440652	0.409211	0.386309	0.717729	0.497337
Chr1:13190001-13200000	1	13190001	13200000	Ncoa2	ENSMUSG00000005886	nuclear receptor coactivator 2 [Source:MGI Symbol;Acc:MGI:1276533]	overlapping	0	0.694194	0.554549	0.552963	0.467697	0.471261	0.291606
Chr1:13250001-13260000	1	13250001	13260000	Ncoa2	ENSMUSG00000005886	nuclear receptor coactivator 2 [Source:MGI Symbol;Acc:MGI:1276533]	overlapping	0	0.648974	0.608694	0.498451	0.53093	0.534189	0.379264
Chr1:13300001-13310000	1	13300001	13310000	Ncoa2	ENSMUSG00000005886	nuclear receptor coactivator 2 [Source:MGI Symbol;Acc:MGI:1276533]	overlapping	0	0.578312	0.521139	0.412212	0.386928	0.495383	0.29519
Chr1:13380001-13400000	1	13380001	13400000	null			Not found	0	0.607905	0.408961	0.386813	0.269849	0.476155	0.211103
Chr1:13420001-13430000	1	13420001	13430000	null			Not found	0	0.662803	0.513081	0.405858	0.350618	0.500278	0.261192
Chr1:13450001-13460000	1	13450001	13460000	null			Not found	0	0.598227	0.494797	0.522345	0.53093	0.577539	0.275503
Chr1:13480001-13510000	1	13480001	13510000	null			Not found	0	0.517926	0.503907	0.493476	0.761752	0.568799	0.332149
Chr1:13540001-13550000	1	13540001	13550000	null			Not found	0	0.708023	0.427976	0.573883	1.36678	0.780657	0.527742
Chr1:13590001-13620000	1	13590001	13620000	Tram1	ENSMUSG00000025935	translocating chain-associating membrane protein 1 [Source:MGI Symbol;Acc:MGI:1919515]	downstream	137	0.635883	0.501614	0.536039	0.63257	0.530926	0.285034
Chr1:13660001-13670000	1	13660001	13670000	Lactb2	ENSMUSG00000025937	lactamase, beta 2 [Source:MGI Symbol;Acc:MGI:2442551]	overlapping	0	0.60597	0.495881	0.563788	0.449542	0.439797	0.325596
Chr1:13830001-13840000	1	13830001	13840000	null			Not found	0	0.572365	0.58895	0.449167	0.440774	0.473708	0.411462
Chr1:14100001-14110000	1	14100001	14110000	null			Not found	0	0.660868	0.427976	0.535424	0.907853	0.606556	0.398934
Chr1:14180001-14190000	1	14180001	14190000	Eya1	ENSMUSG00000025932	eyes absent 1 homolog (Drosophila) [Source:MGI Symbol;Acc:MGI:109344]	overlapping	0	0.611777	0.513175	0.40511	0.413851	0.584881	0.372095
Chr1:14260001-14270000	1	14260001	14270000	Eya1	ENSMUSG00000025932	eyes absent 1 homolog (Drosophila) [Source:MGI Symbol;Acc:MGI:109344]	overlapping	0	0.613852	0.354369	0.363667	0.134615	0.275485	0.350642
Chr1:14710001-14720000	1	14710001	14720000	null			Not found	0	0.586333	0.454506	0.501813	0.602931	0.546075	0.474073
Chr1:14750001-14770000	1	14750001	14770000	Msc	ENSMUSG00000025930	musculin [Source:MGI Symbol;Acc:MGI:1333884]	overlapping	0	0.590135	0.45043	0.509276	0.288004	0.482098	0.3077
Chr1:15200001-15210000	1	15200001	15210000	null			Not found	0	0.656996	0.5914	0.648549	0.341232	0.500278	0.330963
Chr1:15370001-15380000	1	15370001	15380000	Kcnb2	ENSMUSG00000092083	potassium voltage gated channel, Shab-related subfamily, member 2 [Source:MGI Symbol;Acc:MGI:99632]	overlapping	0	0.597948	0.460208	0.521228	0.34185	0.222346	0.309474
Chr1:15480001-15490000	1	15480001	15490000	Kcnb2	ENSMUSG00000092083	potassium voltage gated channel, Shab-related subfamily, member 2 [Source:MGI Symbol;Acc:MGI:99632]	overlapping	0	0.635285	0.537255	0.518992	0.602312	0.531741	0.549204
Chr1:15560001-15570000	1	15560001	15570000	Kcnb2	ENSMUSG00000092083	potassium voltage gated channel, Shab-related subfamily, member 2 [Source:MGI Symbol;Acc:MGI:99632]	overlapping	0	0.633488	0.354369	0.458135	0.413851	0.328624	0.377481
Chr1:15650001-15660000	1	15650001	15660000	Kcnb2	ENSMUSG00000092083	potassium voltage gated channel, Shab-related subfamily, member 2 [Source:MGI Symbol;Acc:MGI:99632]	overlapping	0	0.743703	0.503939	0.500695	0.306159	0.280379	0.21825
Chr1:15710001-15720000	1	15710001	15720000	Kcnb2	ENSMUSG00000092083	potassium voltage gated channel, Shab-related subfamily, member 2 [Source:MGI Symbol;Acc:MGI:99632]	overlapping	0	0.566558	0.400455	0.412951	0.179693	0.415674	0.327388
Chr1:15790001-15800000	1	15790001	15800000	null			Not found	0	0.645242	0.425619	0.463732	0.306159	0.219898	0.347058
Chr1:15890001-15900000	1	15890001	15900000	Gm106	ENSMUSG00000032719	predicted gene 106 [Source:MGI Symbol;Acc:MGI:2684952]	overlapping	0	0.61952	0.569582	0.44731	0.835852	0.601662	0.32202
Chr1:15990001-16030000	1	15990001	16030000	null			Not found	0	0.545849	0.561724	0.580593	0.665545	0.690635	0.375677
Chr1:16050001-16060000	1	16050001	16060000	null			Not found	0	0.611777	0.462564	0.641455	0.566621	0.66459	0.286238
Chr1:16150001-16160000	1	16150001	16160000	null			Not found	0	0.619659	0.554549	0.449167	0.549085	0.391552	0.370312
Chr1:16180001-16200000	1	16180001	16200000	null			Not found	0	0.664948	0.544818	0.474746	0.337157	0.651305	0.488384
Chr1:16240001-16260000	1	16240001	16260000	Stau2	ENSMUSG00000025920	staufen (RNA binding protein) homolog 2 (Drosophila) [Source:MGI Symbol;Acc:MGI:1352508]	overlapping	0	0.577413	0.482026	0.491732	0.256078	0.451858	0.386415
Chr1:16680001-16690000	1	16680001	16690000	Ly96	ENSMUSG00000025779	lymphocyte antigen 96 [Source:MGI Symbol;Acc:MGI:1341909]	overlapping	0	0.615509	0.478586	0.48576	0.188461	0.338413	0.189628
Chr1:16720001-16730000	1	16720001	16730000	null			Not found	0	0.609702	0.616658	0.503679	0.971085	0.65515	0.341699
Chr1:16760001-16770000	1	16760001	16770000	Gm5828	ENSMUSG00000091020	predicted gene 5828 [Source:MGI Symbol;Acc:MGI:3644176]	overlapping	0	0.576376	0.427976	0.449176	1.13448	0.452033	0.330954
Chr1:16790001-16800000	1	16790001	16800000	null			Not found	0	0.598087	0.519961	0.502192	1.07125	0.338413	0.341681
Chr1:16980001-16990000	1	16980001	16990000	null			Not found	0	0.580387	0.528113	0.536172	0.476465	0.338413	0.429348
Chr1:17040001-17050000	1	17040001	17050000	Jph1	ENSMUSG00000042686	junctophilin 1 [Source:MGI Symbol;Acc:MGI:1891495]	overlapping	0	0.568493	0.446354	0.469699	0.620467	0.792543	0.420387
Chr1:17130001-17140000	1	17130001	17140000	null			Not found	0	0.621456	0.486644	0.405479	0.251694	0.309396	0.345265
Chr1:17200001-17210000	1	17200001	17210000	null			Not found	0	0.596012	0.544135	0.586195	0.917239	0.669484	0.364944
Chr1:18030001-18050000	1	18030001	18050000	null			Not found	0	0.723997	0.514895	0.721164	0.45862	0.397495	0.317549
Chr1:18780001-18790000	1	18780001	18790000	null			Not found	0	0.594216	0.524579	0.560805	1.43878	0.449585	0.323803
Chr1:19210001-19220000	1	19210001	19220000	Tfap2b	ENSMUSG00000025927	transcription factor AP-2 beta [Source:MGI Symbol;Acc:MGI:104672]	overlapping	0	0.595873	0.392303	0.43982	0.134615	0.195776	0.339889
Chr1:19390001-19400000	1	19390001	19400000	null			Not found	0	0.57444	0.403801	0.456639	0.494002	0.364982	0.409669
Chr1:20670001-20680000	1	20670001	20680000	Mir206	ENSMUSG00000065559	microRNA 206 [Source:MGI Symbol;Acc:MGI:2676881]	overlapping	0	0.635145	0.437212	0.609711	0.251694	0.219898	0.291597
Chr1:20760001-20780000	1	20760001	20780000	Il17f	ENSMUSG00000041872	interleukin 17F [Source:MGI Symbol;Acc:MGI:2676631]	overlapping	0	0.591173	0.419917	0.471939	0.620776	0.49783	0.300545
Chr1:20800001-20850000	1	20800001	20850000	Mcm3	ENSMUSG00000041859	minichromosome maintenance deficient 3 (S. cerevisiae) [Source:MGI Symbol;Acc:MGI:101845]	overlapping	0	0.622481	0.52898	0.501959	0.6693	0.440845	0.378551
Chr1:20870001-20940000	1	20870001	20940000	Paqr8	ENSMUSG00000025931	progestin and adipoQ receptor family member VIII [Source:MGI Symbol;Acc:MGI:1921479]	overlapping	0	0.58649	0.494884	0.472211	0.34185	0.441295	0.279078
Chr1:20990001-21010000	1	20990001	21010000	Efhc1	ENSMUSG00000041809	EF-hand domain (C-terminal) containing 1 [Source:MGI Symbol;Acc:MGI:1919127]	overlapping	0	0.666954	0.594793	0.508163	0.34185	0.390328	0.487493
Chr1:21030001-21100000	1	21030001	21100000	Tram2	ENSMUSG00000041779	translocating chain-associating membrane protein 2 [Source:MGI Symbol;Acc:MGI:1924817]	overlapping	0	0.676456	0.522357	0.563469	0.520644	0.508218	0.378747
Chr1:21160001-21190000	1	21160001	21190000	null			Not found	0	0.599977	0.543836	0.521101	0.377747	0.320583	0.269537
Chr1:21210001-21230000	1	21210001	21230000	Tmem14a	ENSMUSG00000025933	transmembrane protein 14A [Source:MGI Symbol;Acc:MGI:1922962]	overlapping	0	0.669788	0.428023	0.51805	0.296772	0.500278	0.200363
Chr1:21300001-21310000	1	21300001	21310000	null			Not found	0	0.588269	0.640832	0.396529	0.34185	0.471261	0.28087
Chr1:21390001-21400000	1	21390001	21400000	Kcnq5	ENSMUSG00000028033	potassium voltage-gated channel, subfamily Q, member 5 [Source:MGI Symbol;Acc:MGI:1924937]	overlapping	0	0.596012	0.525757	0.43087	0.413851	0.563205	0.228994
Chr1:21510001-21520000	1	21510001	21520000	Kcnq5	ENSMUSG00000028033	potassium voltage-gated channel, subfamily Q, member 5 [Source:MGI Symbol;Acc:MGI:1924937]	overlapping	0	0.590205	0.378449	0.485382	0.422619	0.391552	0.418613
Chr1:21960001-21970000	1	21960001	21970000	Kcnq5	ENSMUSG00000028033	potassium voltage-gated channel, subfamily Q, member 5 [Source:MGI Symbol;Acc:MGI:1924937]	overlapping	0	0.600023	0.423357	0.463723	0.206616	0.360088	0.148487
Chr1:22750001-22760000	1	22750001	22760000	Rims1	ENSMUSG00000041670	regulating synaptic membrane exocytosis 1 [Source:MGI Symbol;Acc:MGI:2152971]	overlapping	0	0.6552	0.516521	0.551467	0.144002	0.246468	0.449027
Chr1:22780001-22790000	1	22780001	22790000	Rims1	ENSMUSG00000041670	regulating synaptic membrane exocytosis 1 [Source:MGI Symbol;Acc:MGI:2152971]	overlapping	0	0.621456	0.478586	0.483886	0.261081	0.302054	0.447244
Chr1:23210001-23220000	1	23210001	23220000	null			Not found	0	0.594076	0.406157	0.554081	0.629854	0.5244	0.631485
Chr1:23350001-23360000	1	23350001	23360000	null			Not found	0	0.602098	0.464826	0.457378	0.180312	0.418121	0.368511
Chr1:23490001-23500000	1	23490001	23500000	null			Not found	0	0.578312	0.364783	0.432735	0.49462	0.302054	0.447226
Chr1:23530001-23540000	1	23530001	23540000	null			Not found	0	0.566558	0.31634	0.42676	0.30554	0.49783	0.261201
Chr1:23680001-23690000	1	23680001	23690000	null			Not found	0	0.597808	0.515437	0.49061	0.37816	0.393999	0.298757
Chr1:23750001-23770000	1	23750001	23770000	B3gat2	ENSMUSG00000026156	beta-1,3-glucuronyltransferase 2 (glucuronosyltransferase S) [Source:MGI Symbol;Acc:MGI:2389490]	overlapping	0	0.614681	0.394612	0.387561	0.305849	0.461647	0.380156
Chr1:23930001-23970000	1	23930001	23970000	null			Not found	0	0.591173	0.502195	0.519824	0.634238	0.490052	0.324245
Chr1:23990001-24010000	1	23990001	24010000	1110058L19Rik	ENSMUSG00000026154	RIKEN cDNA 1110058L19 gene [Source:MGI Symbol;Acc:MGI:1915252]	overlapping	0	0.582253	0.49991	0.353775	0.297081	0.414451	0.319327
Chr1:24270001-24300000	1	24270001	24300000	Col19a1	ENSMUSG00000026141	collagen, type XIX, alpha 1 [Source:MGI Symbol;Acc:MGI:1095415]	overlapping	0	0.609934	0.493194	0.41942	0.233952	0.332703	0.252846
Chr1:24670001-24680000	1	24670001	24680000	Lmbrd1	ENSMUSG00000073725	LMBR1 domain containing 1 [Source:MGI Symbol;Acc:MGI:1915671]	overlapping	0	0.656996	0.595924	0.441695	0.207235	0.302054	0.246872
Chr1:30080001-30090000	1	30080001	30090000	null			Not found	0	0.621734	0.471706	0.43087	1.0794	0.821909	0.454395
Chr1:30380001-30390000	1	30380001	30390000	null			Not found	0	0.580387	0.524579	0.563419	0.306159	0.275485	0.347058
Chr1:30570001-30580000	1	30570001	30580000	null			Not found	0	0.598087	0.520055	0.530187	0.269849	0.386658	0.182477
Chr1:30710001-30720000	1	30710001	30720000	Gm9898	ENSMUSG00000053185	predicted gene 9898 [Source:MGI Symbol;Acc:MGI:3642391]	overlapping	0	0.57444	0.422274	0.506671	1.06124	0.652354	0.248664
Chr1:30770001-30780000	1	30770001	30780000	null			Not found	0	0.692397	0.487822	0.429383	0.15277	0.389105	0.216466
Chr1:30800001-30810000	1	30800001	30810000	Phf3	ENSMUSG00000048874	PHD finger protein 3 [Source:MGI Symbol;Acc:MGI:2446126]	overlapping	0	0.613713	0.540695	0.408841	0.638622	0.420569	0.356019
Chr1:30950001-30960000	1	30950001	30960000	Ptp4a1	ENSMUSG00000026064	protein tyrosine phosphatase 4a1 [Source:MGI Symbol;Acc:MGI:1277096]	downstream	231	0.609702	0.530375	0.383081	0.521543	0.447138	0.302332
Chr1:31020001-31030000	1	31020001	31030000	null			Not found	0	0.633488	0.49244	0.549601	0.242926	0.534189	0.314851
Chr1:31090001-31100000	1	31090001	31100000	null			Not found	0	0.590065	0.487822	0.663484	0.422619	0.328624	0.411453
Chr1:31270001-31280000	1	31270001	31280000	null			Not found	0	0.658792	0.44183	0.607845	0.87278	0.606556	0.377463
Chr1:32870001-32880000	1	32870001	32880000	null			Not found	0	0.578451	0.540695	0.560066	0.629235	0.548522	0.295172
Chr1:33330001-33340000	1	33330001	33340000	null			Not found	0	0.604034	0.531459	0.501444	0.360005	0.379316	0.34885
Chr1:33680001-33700000	1	33680001	33700000	null			Not found	0	0.602717	0.486644	0.485386	0.391003	0.499054	0.347058
Chr1:33750001-33760000	1	33750001	33760000	Bag2	ENSMUSG00000042215	BCL2-associated athanogene 2 [Source:MGI Symbol;Acc:MGI:1891254]	overlapping	0	0.572365	0.356631	0.399873	0.288004	0.248915	0.32737
Chr1:33810001-33850000	1	33810001	33850000	Zfp451	ENSMUSG00000042197	zinc finger protein 451 [Source:MGI Symbol;Acc:MGI:2137896]	overlapping	0	0.575338	0.502172	0.392135	0.36408	0.446526	0.266555
Chr1:33890001-33920000	1	33890001	33920000	Bend6	ENSMUSG00000042182	BEN domain containing 6 [Source:MGI Symbol;Acc:MGI:2444572]	overlapping	0	0.516682	0.465941	0.418059	0.353953	0.411596	0.385223
Chr1:33940001-33970000	1	33940001	33970000	null			Not found	0	0.515944	0.539156	0.371878	0.665751	0.744415	0.508658
Chr1:34220001-34230000	1	34220001	34230000	Dst	ENSMUSG00000026131	dystonin [Source:MGI Symbol;Acc:MGI:104627]	overlapping	0	0.592001	0.557989	0.354329	0.521543	0.531741	0.4848
Chr1:34290001-34300000	1	34290001	34300000	Dst	ENSMUSG00000026131	dystonin [Source:MGI Symbol;Acc:MGI:104627]	overlapping	0	0.641092	0.568404	0.396142	0.674932	0.915952	0.347067
Chr1:34450001-34510000	1	34450001	34510000	Ptpn18	ENSMUSG00000026126	protein tyrosine phosphatase, non-receptor type 18 [Source:MGI Symbol;Acc:MGI:108410]	overlapping	0	0.613067	0.525969	0.418861	0.643212	0.54019	0.285334
Chr1:34550001-34640000	1	34550001	34640000	Prss40	ENSMUSG00000037529	protease, serine, 40 [Source:MGI Symbol;Acc:MGI:1270857]	overlapping	0	0.623132	0.477099	0.516414	0.928437	0.752145	0.383827
Chr1:34660001-34730000	1	34660001	34730000	C230030N03Rik	ENSMUSG00000089955	RIKEN cDNA C230030N03 gene [Source:MGI Symbol;Acc:MGI:3045297]	overlapping	0	0.647415	0.572591	0.576806	0.446949	0.535138	0.36316
Chr1:34750001-34820000	1	34750001	34820000	Arhgef4	ENSMUSG00000037509	Rho guanine nucleotide exchange factor (GEF) 4 [Source:MGI Symbol;Acc:MGI:2442507]	overlapping	0	0.642061	0.558804	0.464901	0.504906	0.422566	0.368525
Chr1:34860001-34870000	1	34860001	34870000	Plekhb2	ENSMUSG00000026123	pleckstrin homology domain containing, family B (evectins) member 2 [Source:MGI Symbol;Acc:MGI:2385825]	overlapping	0	0.708023	0.514259	0.40511	0.800779	0.783104	0.377472
Chr1:34890001-34900000	1	34890001	34900000	null			Not found	0	0.786568	0.635036	0.577236	0.422619	0.492936	0.416811
Chr1:34920001-34930000	1	34920001	34930000	null			Not found	0	0.576515	0.518877	0.602248	0.800779	0.66459	0.422188
Chr1:34960001-34990000	1	34960001	34990000	null			Not found	0	0.669488	0.477864	0.540396	0.79765	0.642914	0.393572
Chr1:35020001-35030000	1	35020001	35030000	null			Not found	0	0.745499	0.560251	0.69485	0.333082	0.302054	0.291606
Chr1:35070001-35080000	1	35070001	35080000	null			Not found	0	0.615788	0.567225	0.608972	0.584776	0.514611	0.402509
Chr1:35110001-35120000	1	35110001	35120000	null			Not found	0	0.586054	0.541967	0.69932	1.5114	0.870154	0.572485
Chr1:35210001-35220000	1	35210001	35220000	null			Not found	0	0.651189	0.580986	0.654894	0.584776	0.555864	0.357784
Chr1:35250001-35270000	1	35250001	35270000	null			Not found	0	0.601889	0.512539	0.493043	0.70593	0.443468	0.321119
Chr1:35370001-35380000	1	35370001	35380000	null			Not found	0	0.578312	0.493524	0.530187	1.0337	0.891829	0.481215
Chr1:35460001-35470000	1	35460001	35470000	null			Not found	0	0.627542	0.513175	0.629882	0.296772	0.802332	0.47945
Chr1:35520001-35530000	1	35520001	35530000	null			Not found	0	0.611777	0.61204	0.586574	0.395696	0.531741	0.56709
Chr1:35560001-35590000	1	35560001	35590000	null			Not found	0	0.564575	0.431871	0.620422	0.446826	0.46322	0.397739
Chr1:35620001-35630000	1	35620001	35630000	null			Not found	0	0.598087	0.553371	0.532431	0.656777	0.558311	0.36852
Chr1:35680001-35690000	1	35680001	35690000	null			Not found	0	0.627402	0.406157	0.585068	0.423238	0.393999	0.449036
Chr1:35710001-35730000	1	35710001	35730000	null			Not found	0	0.715077	0.446401	0.541016	0.454235	0.428959	0.335421
Chr1:35760001-35790000	1	35760001	35790000	U6	ENSMUSG00000064601	U6 spliceosomal RNA [Source:RFAM;Acc:RF00026]	overlapping	0	0.567941	0.538826	0.650411	0.95042	0.588843	0.403716
Chr1:35810001-35860000	1	35810001	35860000	null			Not found	0	0.655475	0.489198	0.539667	0.667546	0.466926	0.250098
Chr1:35900001-36020000	1	35900001	36020000	null			Not found	0	0.630756	0.50642	0.575334	0.674623	0.617452	0.387607
Chr1:36050001-36130000	1	36050001	36130000	Hs6st1	ENSMUSG00000045216	heparan sulfate 6-O-sulfotransferase 1 [Source:MGI Symbol;Acc:MGI:1354958]	overlapping	0	0.700055	0.542916	0.506011	0.570296	0.493635	0.326037
Chr1:36190001-36200000	1	36190001	36200000	Uggt1	ENSMUSG00000037470	UDP-glucose glycoprotein glucosyltransferase 1 [Source:MGI Symbol;Acc:MGI:2443162]	overlapping	0	0.596012	0.614302	0.469699	0.980472	0.592222	0.395358
Chr1:36240001-36280000	1	36240001	36280000	Uggt1	ENSMUSG00000037470	UDP-glucose glycoprotein glucosyltransferase 1 [Source:MGI Symbol;Acc:MGI:2443162]	overlapping	0	0.631343	0.534404	0.362729	0.398197	0.367342	0.2272
Chr1:36300001-36360000	1	36300001	36360000	Arid5a	ENSMUSG00000037447	AT rich interactive domain 5A (MRF1-like) [Source:MGI Symbol;Acc:MGI:2443039]	overlapping	0	0.586563	0.579839	0.398201	0.484287	0.504706	0.460656
Chr1:36400001-36430000	1	36400001	36430000	Lman2l	ENSMUSG00000001143	lectin, mannose-binding 2-like [Source:MGI Symbol;Acc:MGI:2443010]	overlapping	0	0.797357	0.553041	0.58445	0.6837	0.537335	0.382239
Chr1:36470001-36610000	1	36470001	36610000	Cnnm4	ENSMUSG00000037408	cyclin M4 [Source:MGI Symbol;Acc:MGI:2151060]	overlapping	0	0.684821	0.539261	0.37401	0.484511	0.468664	0.380793
Chr1:36630001-36670000	1	36630001	36670000	Fam178b	ENSMUSG00000046337	family with sequence similarity 178, member B [Source:MGI Symbol;Acc:MGI:3026913]	overlapping	0	0.645657	0.535264	0.466341	0.350927	0.361312	0.292049
Chr1:36690001-36720000	1	36690001	36720000	Cox5b	ENSMUSG00000061518	cytochrome c oxidase, subunit Vb [Source:MGI Symbol;Acc:MGI:88475]	overlapping	0	0.641324	0.530014	0.391046	0.905754	0.659812	0.361369
Chr1:36740001-36790000	1	36740001	36790000	Zap70	ENSMUSG00000026117	zeta-chain (TCR) associated protein kinase [Source:MGI Symbol;Acc:MGI:99613]	overlapping	0	0.660868	0.439511	0.420043	0.68533	0.682489	0.416114
Chr1:37020001-37030000	1	37020001	37030000	Vwa3b	ENSMUSG00000050122	von Willebrand factor A domain containing 3B [Source:MGI Symbol;Acc:MGI:1918103]	overlapping	0	0.645103	0.463648	0.46448	0.440774	0.393999	0.386415
Chr1:37060001-37130000	1	37060001	37130000	Vwa3b	ENSMUSG00000050122	von Willebrand factor A domain containing 3B [Source:MGI Symbol;Acc:MGI:1918103]	overlapping	0	0.645519	0.551251	0.521601	0.358576	0.420519	0.370053
Chr1:37160001-37190000	1	37160001	37190000	Vwa3b	ENSMUSG00000026115	von Willebrand factor A domain containing 3B [Source:MGI Symbol;Acc:MGI:1918103]	overlapping	0	0.562547	0.537616	0.514507	0.743804	0.702463	0.371504
Chr1:37230001-37280000	1	37230001	37280000	Cnga3	ENSMUSG00000026114	cyclic nucleotide gated channel alpha 3 [Source:MGI Symbol;Acc:MGI:1341818]	overlapping	0	0.591227	0.505079	0.46843	0.502006	0.420988	0.334179
Chr1:37310001-37340000	1	37310001	37340000	Inpp4a	ENSMUSG00000026113	inositol polyphosphate-4-phosphatase, type I [Source:MGI Symbol;Acc:MGI:1931123]	overlapping	0	0.627495	0.5933	0.454271	0.536569	0.488158	0.401927
Chr1:37370001-37440000	1	37370001	37440000	Inpp4a	ENSMUSG00000026113	inositol polyphosphate-4-phosphatase, type I [Source:MGI Symbol;Acc:MGI:1931123]	overlapping	0	0.589632	0.473712	0.400361	0.53818	0.470262	0.434977
Chr1:37470001-37480000	1	37470001	37480000	Mgat4a	ENSMUSG00000026110	mannoside acetylglucosaminyltransferase 4, isoenzyme A [Source:MGI Symbol;Acc:MGI:2662992]	overlapping	0	0.592141	0.602804	0.360305	1.03432	0.587328	0.424007
Chr1:37520001-37560000	1	37520001	37560000	Mgat4a	ENSMUSG00000026110	mannoside acetylglucosaminyltransferase 4, isoenzyme A [Source:MGI Symbol;Acc:MGI:2662992]	overlapping	0	0.582218	0.499568	0.33146	0.319466	0.320845	0.324251
Chr1:37610001-37640000	1	37610001	37640000	2010300C02Rik	ENSMUSG00000026090	RIKEN cDNA 2010300C02 gene [Source:MGI Symbol;Acc:MGI:1919347]	overlapping	0	0.657641	0.515405	0.41793	0.656983	0.507503	0.29577
Chr1:37660001-37670000	1	37660001	37670000	2010300C02Rik	ENSMUSG00000026090	RIKEN cDNA 2010300C02 gene [Source:MGI Symbol;Acc:MGI:1919347]	overlapping	0	0.641092	0.426798	0.378232	0.602312	0.321283	0.470489
Chr1:37690001-37730000	1	37690001	37730000	2010300C02Rik	ENSMUSG00000026090	RIKEN cDNA 2010300C02 gene [Source:MGI Symbol;Acc:MGI:1919347]	overlapping	0	0.626574	0.437483	0.448984	0.312735	0.358253	0.333643
Chr1:37830001-37840000	1	37830001	37840000	Tsga10	ENSMUSG00000060771	testis specific 10 [Source:MGI Symbol;Acc:MGI:2685063]	overlapping	0	0.619938	0.560251	0.44767	1.37617	0.954757	0.391792
Chr1:37890001-37920000	1	37890001	37920000	Mitd1	ENSMUSG00000026088	MIT, microtubule interacting and transport, domain containing 1 [Source:MGI Symbol;Acc:MGI:1916278]	overlapping	0	0.572365	0.479403	0.409463	0.567239	0.370576	0.37628
Chr1:37950001-37980000	1	37950001	37980000	Gm15457	ENSMUSG00000087374	predicted gene 15457 [Source:MGI Symbol;Acc:MGI:3705190]	overlapping	0	0.563192	0.439505	0.483756	0.287592	0.418121	0.294581
Chr1:38130001-38150000	1	38130001	38150000	Rev1	ENSMUSG00000026082	REV1 homolog (S. cerevisiae) [Source:MGI Symbol;Acc:MGI:1929074]	downstream	339	0.614611	0.398688	0.489303	0.103308	0.55464	0.271022
Chr1:38200001-38210000	1	38200001	38210000	Aff3	ENSMUSG00000037138	AF4/FMR2 family, member 3 [Source:MGI Symbol;Acc:MGI:106927]	overlapping	0	0.690043	0.493524	0.513395	0.368773	0.584881	0.536694
Chr1:38250001-38290000	1	38250001	38290000	Aff3	ENSMUSG00000037138	AF4/FMR2 family, member 3 [Source:MGI Symbol;Acc:MGI:106927]	overlapping	0	0.545365	0.472543	0.457754	0.474582	0.50692	0.442779
Chr1:38360001-38400000	1	38360001	38400000	Aff3	ENSMUSG00000037138	AF4/FMR2 family, member 3 [Source:MGI Symbol;Acc:MGI:106927]	overlapping	0	0.571951	0.451608	0.398855	0.393504	0.519068	0.445003
Chr1:38440001-38450000	1	38440001	38450000	Aff3	ENSMUSG00000037138	AF4/FMR2 family, member 3 [Source:MGI Symbol;Acc:MGI:106927]	overlapping	0	0.576515	0.409597	0.396151	0.450161	0.391552	0.37568
Chr1:38520001-38540000	1	38520001	38540000	Aff3	ENSMUSG00000037138	AF4/FMR2 family, member 3 [Source:MGI Symbol;Acc:MGI:106927]	overlapping	0	0.679536	0.500499	0.415191	0.404464	0.443468	0.430244
Chr1:38570001-38580000	1	38570001	38580000	Aff3	ENSMUSG00000037138	AF4/FMR2 family, member 3 [Source:MGI Symbol;Acc:MGI:106927]	overlapping	0	0.602098	0.495881	0.567889	0.324314	0.558311	0.356001
Chr1:38630001-38640000	1	38630001	38640000	Aff3	ENSMUSG00000037138	AF4/FMR2 family, member 3 [Source:MGI Symbol;Acc:MGI:106927]	overlapping	0	0.603894	0.539611	0.452898	0.242926	0.41078	0.355983
Chr1:38660001-38670000	1	38660001	38670000	Aff3	ENSMUSG00000037138	AF4/FMR2 family, member 3 [Source:MGI Symbol;Acc:MGI:106927]	overlapping	0	0.596012	0.551109	0.574992	0.405083	0.604109	0.500903
Chr1:38690001-38700000	1	38690001	38700000	null			Not found	0	0.566558	0.570571	0.529817	0.386928	0.302054	0.434716
Chr1:38720001-38750000	1	38720001	38750000	null			Not found	0	0.593478	0.493194	0.476047	0.575595	0.578471	0.370309
Chr1:38770001-38800000	1	38770001	38800000	Lonrf2	ENSMUSG00000048814	LON peptidase N-terminal domain and ring finger 2 [Source:MGI Symbol;Acc:MGI:1920209]	overlapping	0	0.67465	0.515405	0.508158	0.428877	0.446323	0.228394
Chr1:38830001-38900000	1	38830001	38900000	Lonrf2	ENSMUSG00000048814	LON peptidase N-terminal domain and ring finger 2 [Source:MGI Symbol;Acc:MGI:1920209]	overlapping	0	0.592674	0.509513	0.489117	0.40106	0.457077	0.347306
Chr1:38960001-38970000	1	38960001	38970000	null			Not found	0	0.570429	0.364689	0.595533	0.521543	0.466366	0.409678
Chr1:38990001-39070000	1	38990001	39070000	Pdcl3	ENSMUSG00000026078	phosducin-like 3 [Source:MGI Symbol;Acc:MGI:1916083]	overlapping	0	0.574941	0.499703	0.435305	0.257483	0.469469	0.265216
Chr1:39090001-39110000	1	39090001	39110000	null			Not found	0	0.615788	0.517746	0.581531	0.341541	0.496607	0.475861
Chr1:39130001-39140000	1	39130001	39140000	null			Not found	0	0.603755	0.449888	0.443569	0.512775	0.5244	0.284446
Chr1:39170001-39210000	1	39170001	39210000	Npas2	ENSMUSG00000026077	neuronal PAS domain protein 2 [Source:MGI Symbol;Acc:MGI:109232]	overlapping	0	0.606314	0.457899	0.52123	0.499313	0.376432	0.440962
Chr1:39240001-39310000	1	39240001	39310000	Npas2	ENSMUSG00000026077	neuronal PAS domain protein 2 [Source:MGI Symbol;Acc:MGI:109232]	overlapping	0	0.66879	0.490758	0.571364	0.525566	0.439847	0.412479
Chr1:39330001-39340000	1	39330001	39340000	Npas2	ENSMUSG00000026077	neuronal PAS domain protein 2 [Source:MGI Symbol;Acc:MGI:109232]	overlapping	0	0.617584	0.482026	0.555947	0.368773	0.381763	0.427547
Chr1:39360001-39420000	1	39360001	39420000	Npas2	ENSMUSG00000026077	neuronal PAS domain protein 2 [Source:MGI Symbol;Acc:MGI:109232]	overlapping	0	0.58919	0.470756	0.367272	0.466133	0.525682	0.36823
Chr1:39440001-39470000	1	39440001	39470000	Tbc1d8	ENSMUSG00000003134	TBC1 domain family, member 8 [Source:MGI Symbol;Acc:MGI:1927225]	overlapping	0	0.581631	0.53771	0.352211	0.368567	0.522069	0.328574
Chr1:39500001-39540000	1	39500001	39540000	U3	ENSMUSG00000065629	Small nucleolar RNA U3 [Source:RFAM;Acc:RF00012]	overlapping	0	0.579279	0.494137	0.404921	0.308196	0.368566	0.259397
Chr1:39580001-39590000	1	39580001	39590000	null			Not found	0	0.590205	0.645356	0.433484	0.296772	0.442244	0.509846
Chr1:39620001-39740000	1	39620001	39740000	Creg2	ENSMUSG00000050967	cellular repressor of E1A-stimulated genes 2 [Source:MGI Symbol;Acc:MGI:1928333]	overlapping	0	0.611258	0.477463	0.450783	0.350042	0.452528	0.279227
Chr1:39760001-39780000	1	39760001	39780000	null			Not found	0	0.670825	0.536171	0.394285	0.265465	0.428959	0.213787
Chr1:39810001-39860000	1	39810001	39860000	null			Not found	0	0.616119	0.427759	0.559087	0.350989	0.418541	0.311994
Chr1:39910001-39970000	1	39910001	39970000	Map4k4	ENSMUSG00000026074	mitogen-activated protein kinase kinase kinase kinase 4 [Source:MGI Symbol;Acc:MGI:1349394]	overlapping	0	0.596704	0.497011	0.499261	0.404877	0.383861	0.286834
Chr1:39990001-40010000	1	39990001	40010000	Map4k4	ENSMUSG00000026074	mitogen-activated protein kinase kinase kinase kinase 4 [Source:MGI Symbol;Acc:MGI:1349394]	overlapping	0	0.579279	0.495881	0.456071	0.733162	0.740802	0.401613
Chr1:40050001-40110000	1	40050001	40110000	Il1r2	ENSMUSG00000026073	interleukin 1 receptor, type II [Source:MGI Symbol;Acc:MGI:96546]	overlapping	0	0.697699	0.549554	0.529379	0.539595	0.501035	0.369416
Chr1:40130001-40190000	1	40130001	40190000	null			Not found	0	0.573748	0.514863	0.543318	0.425851	0.398777	0.361367
Chr1:40210001-40240000	1	40210001	40240000	Il1r1	ENSMUSG00000026072	interleukin 1 receptor, type I [Source:MGI Symbol;Acc:MGI:96545]	overlapping	0	0.569923	0.482874	0.413946	0.384005	0.374654	0.2761
Chr1:40260001-40270000	1	40260001	40270000	Il1r1	ENSMUSG00000026072	interleukin 1 receptor, type I [Source:MGI Symbol;Acc:MGI:96545]	overlapping	0	0.629338	0.411954	0.39652	0.360005	0.41078	0.393557
Chr1:40370001-40410000	1	40370001	40410000	null			Not found	0	0.60348	0.511655	0.565843	0.404928	0.447138	0.398936
Chr1:40530001-40550000	1	40530001	40550000	Il18rap	ENSMUSG00000026068	interleukin 18 receptor accessory protein [Source:MGI Symbol;Acc:MGI:1338888]	overlapping	0	0.580247	0.376776	0.555956	0.45862	0.51968	0.215575
Chr1:40630001-40640000	1	40630001	40640000	Slc9a4	ENSMUSG00000026065	solute carrier family 9 (sodium/hydrogen exchanger), member 4 [Source:MGI Symbol;Acc:MGI:105074]	overlapping	0	0.688247	0.576462	0.597768	0.395696	0.408333	0.343491
Chr1:40710001-40720000	1	40710001	40720000	Slc9a2	ENSMUSG00000026062	solute carrier family 9 (sodium/hydrogen exchanger), member 2 [Source:MGI Symbol;Acc:MGI:105075]	overlapping	0	0.609841	0.300318	0.485382	0.260462	0.495383	0.39
Chr1:40740001-40750000	1	40740001	40750000	Slc9a2	ENSMUSG00000026062	solute carrier family 9 (sodium/hydrogen exchanger), member 2 [Source:MGI Symbol;Acc:MGI:105075]	overlapping	0	0.715766	0.518877	0.505544	0.476465	0.306949	0.461555
Chr1:40770001-40820000	1	40770001	40820000	Mfsd9	ENSMUSG00000041945	major facilitator superfamily domain containing 9 [Source:MGI Symbol;Acc:MGI:2443548]	overlapping	0	0.581381	0.402011	0.489416	0.483851	0.544257	0.359582
Chr1:40860001-40890000	1	40860001	40890000	AC101702.1	ENSMUSG00000094136	No description	overlapping	0	0.600529	0.38657	0.445183	0.224977	0.282826	0.275506
Chr1:40990001-41020000	1	40990001	41020000	null			Not found	0	0.600575	0.409205	0.458628	0.575802	0.48909	0.264182
Chr1:42100001-42110000	1	42100001	42110000	null			Not found	0	0.593797	0.47967	0.434232	0.34185	0.215004	0.534911
Chr1:42190001-42200000	1	42190001	42200000	null			Not found	0	0.710098	0.505023	0.613073	0.306159	0.275485	0.388207
Chr1:42390001-42400000	1	42390001	42400000	null			Not found	0	0.586054	0.547669	0.426021	0.440774	0.423016	0.39
Chr1:42520001-42530000	1	42520001	42530000	null			Not found	0	0.633628	0.410681	0.454773	0.144002	0.389105	0.42398
Chr1:42580001-42600000	1	42580001	42600000	null			Not found	0	0.772189	0.519466	0.653957	0.481468	0.468814	0.31844
Chr1:42620001-42630000	1	42620001	42630000	null			Not found	0	0.599744	0.46591	0.549971	0.736928	0.471261	0.361378
Chr1:42660001-42760000	1	42660001	42760000	2610017I09Rik	ENSMUSG00000060424	RIKEN cDNA 2610017I09 gene [Source:MGI Symbol;Acc:MGI:1913547]	overlapping	0	0.581879	0.456641	0.445323	0.370527	0.425323	0.356362
Chr1:42780001-42810000	1	42780001	42810000	null			Not found	0	0.565866	0.452574	0.434358	0.473543	0.446323	0.307703
Chr1:42890001-42960000	1	42890001	42960000	Mrps9	ENSMUSG00000060679	mitochondrial ribosomal protein S9 [Source:MGI Symbol;Acc:MGI:1916777]	overlapping	0	0.586984	0.545327	0.518508	0.241497	0.299357	0.341686
Chr1:43030001-43100000	1	43030001	43100000	Gpr45	ENSMUSG00000041907	G protein-coupled receptor 45 [Source:MGI Symbol;Acc:MGI:2135882]	overlapping	0	0.593306	0.525306	0.424791	0.444708	0.460573	0.397405
Chr1:43120001-43220000	1	43120001	43220000	Fhl2	ENSMUSG00000008136	four and a half LIM domains 2 [Source:MGI Symbol;Acc:MGI:1338762]	overlapping	0	0.58719	0.470674	0.504837	0.434513	0.427281	0.328457
Chr1:43250001-43330000	1	43250001	43330000	null			Not found	0	0.614249	0.44914	0.497473	0.354061	0.360394	0.389988
Chr1:43360001-43370000	1	43360001	43370000	null			Not found	0	0.782975	0.522317	0.586565	0.314308	0.335965	0.400717
Chr1:43430001-43480000	1	43430001	43480000	Nck2	ENSMUSG00000066877	non-catalytic region of tyrosine kinase adaptor protein 2 [Source:MGI Symbol;Acc:MGI:1306821]	overlapping	0	0.580027	0.522571	0.467984	0.311172	0.379875	0.353852
Chr1:43500001-43550000	1	43500001	43550000	Nck2	ENSMUSG00000066877	non-catalytic region of tyrosine kinase adaptor protein 2 [Source:MGI Symbol;Acc:MGI:1306821]	overlapping	0	0.622673	0.480942	0.516899	0.440898	0.338343	0.345274
Chr1:43690001-43700000	1	43690001	43700000	null			Not found	0	0.698344	0.507285	0.545879	0.917239	0.676825	0.357802
Chr1:43730001-43750000	1	43730001	43750000	1500015O10Rik	ENSMUSG00000026051	RIKEN cDNA 1500015O10 gene [Source:MGI Symbol;Acc:MGI:1926146]	overlapping	0	0.597948	0.537844	0.46261	0.346234	0.573869	0.282654
Chr1:43780001-43790000	1	43780001	43790000	Uxs1	ENSMUSG00000057363	UDP-glucuronate decarboxylase 1 [Source:MGI Symbol;Acc:MGI:1915133]	overlapping	0	0.613852	0.436034	0.415935	0.333082	0.468814	0.527724
Chr1:43820001-43830000	1	43820001	43830000	Uxs1	ENSMUSG00000057363	UDP-glucuronate decarboxylase 1 [Source:MGI Symbol;Acc:MGI:1915133]	overlapping	0	0.655339	0.564869	0.335293	0.440774	0.328624	0.327379
Chr1:43870001-43890000	1	43870001	43890000	null			Not found	0	0.589376	0.495291	0.396335	0.405083	0.289993	0.285337
Chr1:44010001-44020000	1	44010001	44020000	A530098C11Rik	ENSMUSG00000047343	RIKEN cDNA A530098C11 gene [Source:MGI Symbol;Acc:MGI:3611450]	overlapping	0	0.578312	0.513081	0.572756	0.350618	0.584881	0.388207
Chr1:44040001-44050000	1	44040001	44050000	null			Not found	0	0.592001	0.528019	0.482768	0.773856	0.420569	0.398943
Chr1:44200001-44210000	1	44200001	44210000	4832428D23Rik	ENSMUSG00000046828	RIKEN cDNA 4832428D23 gene [Source:MGI Symbol;Acc:MGI:2685837]	overlapping	0	0.631274	0.457852	0.496207	0.477084	0.275485	0.468706
Chr1:44550001-44560000	1	44550001	44560000	Gulp1	ENSMUSG00000056870	GULP, engulfment adaptor PTB domain containing 1 [Source:MGI Symbol;Acc:MGI:1920407]	overlapping	0	0.602098	0.363511	0.429004	0.197848	0.517059	0.356001
Chr1:45090001-45100000	1	45090001	45100000	null			Not found	0	0.704151	0.472884	0.476423	1.02555	0.940074	0.363152
Chr1:45770001-45780000	1	45770001	45780000	RNaseP_nuc	ENSMUSG00000087764	Nuclear RNase P [Source:RFAM;Acc:RF00009]	overlapping	0	0.688386	0.552193	0.473818	0.314927	0.352747	0.295181
Chr1:45990001-46000000	1	45990001	46000000	null			Not found	0	0.580247	0.401539	0.52833	0.350618	0.302054	0.391783
Chr1:46020001-46030000	1	46020001	46030000	Gm4776	ENSMUSG00000044457	predicted gene 4776 [Source:MGI Symbol;Acc:MGI:3643324]	overlapping	0	0.629338	0.59484	0.692227	0.368773	0.364982	0.377472
Chr1:46410001-46420000	1	46410001	46420000	null			Not found	0	0.602098	0.454412	0.450672	0.584776	0.635573	0.429348
Chr1:46890001-46900000	1	46890001	46900000	null			Not found	0	0.582183	0.436034	0.484643	0.144002	0.495383	0.356001
Chr1:46960001-46970000	1	46960001	46970000	null			Not found	0	0.580247	0.560251	0.661978	0.539698	0.548522	0.540261
Chr1:47200001-47210000	1	47200001	47210000	null			Not found	0	0.578172	0.486739	0.511899	0.350618	0.500278	0.572458
Chr1:50400001-50410000	1	50400001	50410000	null			Not found	0	0.598087	0.399183	0.470077	1.16893	0.657248	0.550996
Chr1:51280001-51310000	1	51280001	51310000	Sdpr	ENSMUSG00000045954	serum deprivation response [Source:MGI Symbol;Acc:MGI:99513]	overlapping	0	0.559227	0.477408	0.505298	0.284875	0.435019	0.454989
Chr1:51350001-51360000	1	51350001	51360000	null			Not found	0	0.582183	0.578724	0.602617	0.18908	0.132848	0.32202
Chr1:51380001-51390000	1	51380001	51390000	null			Not found	0	0.635424	0.497059	0.546248	0.638004	0.531741	0.432942
Chr1:51490001-51500000	1	51490001	51500000	null			Not found	0	0.647178	0.514259	0.557073	0.179693	0.531741	0.436508
Chr1:51570001-51600000	1	51570001	51600000	null			Not found	0	0.537655	0.49431	0.448665	0.308875	0.327109	0.378661
Chr1:51620001-51640000	1	51620001	51640000	null			Not found	0	0.638328	0.483793	0.44991	0.440774	0.276708	0.263875
Chr1:51680001-51710000	1	51680001	51710000	null			Not found	0	0.59403	0.459423	0.495471	0.545956	0.526031	0.319627
Chr1:51730001-51750000	1	51730001	51750000	Myo1b	ENSMUSG00000018417	myosin IB [Source:MGI Symbol;Acc:MGI:107752]	overlapping	0	0.583151	0.551109	0.450663	0.74193	0.560758	0.37568
Chr1:51850001-51860000	1	51850001	51860000	Myo1b	ENSMUSG00000018417	myosin IB [Source:MGI Symbol;Acc:MGI:107752]	overlapping	0	0.617584	0.585604	0.386813	0.953549	0.783104	0.175335
Chr1:51910001-51950000	1	51910001	51950000	Myo1b	ENSMUSG00000018417	myosin IB [Source:MGI Symbol;Acc:MGI:107752]	overlapping	0	0.553247	0.469444	0.459989	0.48366	0.332907	0.314414
Chr1:51970001-51980000	1	51970001	51980000	null			Not found	0	0.576376	0.48556	0.486878	0.288004	0.466366	0.334539
Chr1:52120001-52170000	1	52120001	52170000	Stat1	ENSMUSG00000026104	signal transducer and activator of transcription 1 [Source:MGI Symbol;Acc:MGI:103063]	overlapping	0	0.658573	0.556104	0.442967	0.422866	0.363934	0.416109
Chr1:52420001-52430000	1	52420001	52430000	null			Not found	0	0.60597	0.689181	0.569764	1.07063	0.251362	0.298757
Chr1:52630001-52660000	1	52630001	52660000	Tmem194b	ENSMUSG00000043015	transmembrane protein 194B [Source:MGI Symbol;Acc:MGI:2444113]	overlapping	0	0.540882	0.478194	0.441202	0.41698	0.410896	0.323806
Chr1:52790001-52810000	1	52790001	52810000	Inpp1	ENSMUSG00000026102	inositol polyphosphate-1-phosphatase [Source:MGI Symbol;Acc:MGI:104848]	overlapping	0	0.625606	0.516026	0.432929	0.265156	0.55464	0.289805
Chr1:53380001-53390000	1	53380001	53390000	null			Not found	0	0.568493	0.467088	0.525329	0.818315	0.75164	0.377463
Chr1:53640001-53650000	1	53640001	53650000	Dnahc7a	ENSMUSG00000096141	dynein, axonemal, heavy chain 7A [Source:MGI Symbol;Acc:MGI:2685838]	overlapping	0	0.580387	0.483204	0.546239	0.800779	0.519506	0.508063
Chr1:53970001-54000000	1	53970001	54000000	Hecw2	ENSMUSG00000042807	HECT, C2 and WW domain containing E3 ubiquitin protein ligase 2 [Source:MGI Symbol;Acc:MGI:2685817]	overlapping	0	0.608551	0.481304	0.468704	0.423031	0.402739	0.333938
Chr1:54040001-54050000	1	54040001	54050000	Hecw2	ENSMUSG00000042807	HECT, C2 and WW domain containing E3 ubiquitin protein ligase 2 [Source:MGI Symbol;Acc:MGI:2685817]	overlapping	0	0.706226	0.422179	0.457008	0.37816	0.304502	0.339898
Chr1:54210001-54220000	1	54210001	54220000	null			Not found	0	0.594076	0.563691	0.499569	0.592926	0.391552	0.354209
Chr1:54250001-54260000	1	54250001	54260000	Ccdc150	ENSMUSG00000025983	coiled-coil domain containing 150 [Source:MGI Symbol;Acc:MGI:1925266]	overlapping	0	0.631413	0.564869	0.476423	0.818934	0.357641	0.42933
Chr1:54360001-54370000	1	54360001	54370000	Ccdc150	ENSMUSG00000025983	coiled-coil domain containing 150 [Source:MGI Symbol;Acc:MGI:1925266]	overlapping	0	0.574301	0.46935	0.364785	0.512157	0.609003	0.640438
Chr1:54600001-54620000	1	54600001	54620000	null			Not found	0	0.650151	0.498142	0.521412	1.0844	0.752863	0.313072
Chr1:54760001-54770000	1	54760001	54770000	Ankrd44	ENSMUSG00000052331	ankyrin repeat domain 44 [Source:MGI Symbol;Acc:MGI:3045243]	overlapping	0	0.609702	0.45903	0.313634	0.413851	0.418121	0.368529
Chr1:54800001-54810000	1	54800001	54810000	Ankrd44	ENSMUSG00000052331	ankyrin repeat domain 44 [Source:MGI Symbol;Acc:MGI:3045243]	overlapping	0	0.568493	0.538433	0.530556	0.665545	0.408333	0.423989
Chr1:54840001-54870000	1	54840001	54870000	Ankrd44	ENSMUSG00000052331	ankyrin repeat domain 44 [Source:MGI Symbol;Acc:MGI:3045243]	overlapping	0	0.605278	0.548392	0.391169	0.287798	0.479302	0.308298
Chr1:54900001-54930000	1	54900001	54930000	Ankrd44	ENSMUSG00000052331	ankyrin repeat domain 44 [Source:MGI Symbol;Acc:MGI:3045243]	overlapping	0	0.633349	0.552256	0.375612	0.407799	0.480117	0.32081
Chr1:55030001-55060000	1	55030001	55060000	Coq10b	ENSMUSG00000025981	coenzyme Q10 homolog B (S. cerevisiae) [Source:MGI Symbol;Acc:MGI:1915126]	overlapping	0	0.624176	0.472036	0.400131	0.476671	0.613082	0.27967
Chr1:56730001-56740000	1	56730001	56740000	null			Not found	0	0.595873	0.416477	0.431996	0.360005	0.521953	0.402518
Chr1:56780001-56800000	1	56780001	56800000	Satb2	ENSMUSG00000038331	special AT-rich sequence binding protein 2 [Source:MGI Symbol;Acc:MGI:2679336]	overlapping	0	0.659002	0.427387	0.441699	0.913474	0.558311	0.401618
Chr1:56950001-56990000	1	56950001	56990000	Satb2	ENSMUSG00000038331	special AT-rich sequence binding protein 2 [Source:MGI Symbol;Acc:MGI:2679336]	overlapping	0	0.520336	0.412201	0.416403	0.197848	0.321982	0.245091
Chr1:57090001-57100000	1	57090001	57100000	null			Not found	0	0.623531	0.606244	0.552963	0.269849	0.331071	0.586778
Chr1:57120001-57130000	1	57120001	57130000	null			Not found	0	0.596152	0.523495	0.537289	0.503388	0.333518	0.477658
Chr1:57200001-57210000	1	57200001	57210000	null			Not found	0	0.592001	0.574106	0.454773	0.197848	0.299607	0.409678
Chr1:57420001-57450000	1	57420001	57450000	SNORA17	ENSMUSG00000077776	Small nucleolar RNA SNORA17 [Source:RFAM;Acc:RF00560]	overlapping	0	0.656258	0.515405	0.418804	0.359799	0.330256	0.301741
Chr1:57530001-57540000	1	57530001	57540000	null			Not found	0	0.641231	0.630418	0.574992	0.539698	0.521953	0.391774
Chr1:57570001-57580000	1	57570001	57580000	null			Not found	0	0.652985	0.492346	0.41744	0.296772	0.331071	0.381047
Chr1:57690001-57720000	1	57690001	57720000	null			Not found	0	0.518066	0.475539	0.558936	0.383593	0.343191	0.502098
Chr1:57780001-57790000	1	57780001	57790000	Spats2l	ENSMUSG00000038305	spermatogenesis associated, serine-rich 2-like [Source:MGI Symbol;Acc:MGI:1914448]	overlapping	0	0.590205	0.574106	0.633983	0.495238	0.362535	0.481224
Chr1:57870001-57880000	1	57870001	57880000	Spats2l	ENSMUSG00000038305	spermatogenesis associated, serine-rich 2-like [Source:MGI Symbol;Acc:MGI:1914448]	overlapping	0	0.680504	0.652331	0.57537	0.404464	0.389105	0.461555
Chr1:57900001-57910000	1	57900001	57910000	Spats2l	ENSMUSG00000038305	spermatogenesis associated, serine-rich 2-like [Source:MGI Symbol;Acc:MGI:1914448]	overlapping	0	0.657136	0.525757	0.566411	0.296772	0.38421	0.314851
Chr1:57980001-57990000	1	57980001	57990000	Kctd18	ENSMUSG00000054770	potassium channel tetramerisation domain containing 18 [Source:MGI Symbol;Acc:MGI:3603813]	overlapping	0	0.60583	0.539611	0.467464	0.440774	0.338413	0.398934
Chr1:58030001-58050000	1	58030001	58050000	Aox1	ENSMUSG00000063558	aldehyde oxidase 1 [Source:MGI Symbol;Acc:MGI:88035]	overlapping	0	0.624429	0.47107	0.562107	0.503698	0.517233	0.490168
Chr1:58070001-58110000	1	58070001	58110000	Aox1	ENSMUSG00000063558	aldehyde oxidase 1 [Source:MGI Symbol;Acc:MGI:88035]	overlapping	0	0.558675	0.499862	0.558468	0.341695	0.374596	0.464243
Chr1:58190001-58230000	1	58190001	58230000	Aox3	ENSMUSG00000064294	aldehyde oxidase 3 [Source:MGI Symbol;Acc:MGI:1918974]	overlapping	0	0.605242	0.467135	0.532706	0.442966	0.491188	0.40386
Chr1:58280001-58310000	1	58280001	58310000	Gm15759	ENSMUSG00000089822	predicted gene 15759 [Source:MGI Symbol;Acc:MGI:3783202]	overlapping	0	0.631413	0.499321	0.486253	0.590828	0.407634	0.382242
Chr1:58350001-58360000	1	58350001	58360000	Aox3l1	ENSMUSG00000079554	aldehyde oxidase 3-like 1 [Source:MGI Symbol;Acc:MGI:3529596]	overlapping	0	0.654921	0.487822	0.454025	0.206616	0.579986	0.375698
Chr1:58660001-58670000	1	58660001	58670000	Als2cr12	ENSMUSG00000047528	amyotrophic lateral sclerosis 2 (juvenile) chromosome region, candidate 12 (human) [Source:MGI Symbol;Acc:MGI:1918359]	overlapping	0	0.617724	0.517699	0.52869	0.431387	0.495383	0.509864
Chr1:58740001-58750000	1	58740001	58750000	Cflar	ENSMUSG00000026031	CASP8 and FADD-like apoptosis regulator [Source:MGI Symbol;Acc:MGI:1336166]	overlapping	0	0.566558	0.408419	0.452898	1.08816	0.756534	0.542053
Chr1:58770001-58780000	1	58770001	58780000	null			Not found	0	0.566558	0.294522	0.557812	0.826465	0.949863	0.357793
Chr1:59120001-59130000	1	59120001	59130000	Tmem237	ENSMUSG00000038079	transmembrane protein 237 [Source:MGI Symbol;Acc:MGI:2138365]	overlapping	0	0.657136	0.533815	0.322972	0.144002	0.418121	0.563515
Chr1:59160001-59170000	1	59160001	59170000	Mpp4	ENSMUSG00000079550	membrane protein, palmitoylated 4 (MAGUK p55 subfamily member 4) [Source:MGI Symbol;Acc:MGI:2386681]	overlapping	0	0.629338	0.537349	0.298699	0.377541	0.5244	0.332747
Chr1:59270001-59280000	1	59270001	59280000	Cdk15	ENSMUSG00000026023	cyclin-dependent kinase 15 [Source:MGI Symbol;Acc:MGI:3583944]	overlapping	0	0.611637	0.425714	0.525338	1.03432	0.667037	0.255824
Chr1:59320001-59330000	1	59320001	59330000	Cdk15	ENSMUSG00000026023	cyclin-dependent kinase 15 [Source:MGI Symbol;Acc:MGI:3583944]	overlapping	0	0.627681	0.579902	0.588061	0.6837	0.415674	0.255815
Chr1:59370001-59510000	1	59370001	59510000	Fzd7	ENSMUSG00000041075	frizzled homolog 7 (Drosophila) [Source:MGI Symbol;Acc:MGI:108570]	overlapping	0	0.596318	0.462672	0.433216	0.357323	0.33247	0.237167
Chr1:59540001-59550000	1	59540001	59550000	Gm973	ENSMUSG00000047361	predicted gene 973 [Source:MGI Symbol;Acc:MGI:2685819]	overlapping	0	0.721991	0.579902	0.553333	0.432006	0.41078	0.395358
Chr1:59610001-59620000	1	59610001	59620000	Gm973	ENSMUSG00000047361	predicted gene 973 [Source:MGI Symbol;Acc:MGI:2685819]	overlapping	0	0.692258	0.592484	0.42639	0.34185	0.386658	0.286238
Chr1:59920001-59930000	1	59920001	59930000	Fam117b	ENSMUSG00000041040	family with sequence similarity 117, member B [Source:MGI Symbol;Acc:MGI:1920000]	overlapping	0	0.641231	0.497059	0.49883	0.314308	0.468814	0.296965
Chr1:59990001-60000000	1	59990001	60000000	Ica1l	ENSMUSG00000026018	islet cell autoantigen 1-like [Source:MGI Symbol;Acc:MGI:1917625]	overlapping	0	0.631413	0.496964	0.447301	0.53093	0.55097	0.440075
Chr1:60610001-60620000	1	60610001	60620000	AL683804.1	ENSMUSG00000088973	No description	overlapping	0	0.615648	0.409597	0.634353	0.207235	0.38421	0.445433
Chr1:60820001-60830000	1	60820001	60830000	null			Not found	0	0.586054	0.355453	0.578354	0.522162	0.466366	0.432924
Chr1:60850001-60860000	1	60850001	60860000	null			Not found	0	0.574301	0.369307	0.352094	0.0450779	0.492936	0.382831
Chr1:60950001-60960000	1	60950001	60960000	null			Not found	0	0.619659	0.406157	0.357691	0.242926	0.294713	0.466922
Chr1:61040001-61050000	1	61040001	61050000	null			Not found	0	0.631413	0.453328	0.405867	0.278617	0.439797	0.27371
Chr1:61300001-61320000	1	61300001	61320000	Gm11587	ENSMUSG00000085248	predicted gene 11587 [Source:MGI Symbol;Acc:MGI:3652110]	overlapping	0	0.706915	0.471164	0.55651	0.30554	0.483322	0.316639
Chr1:61370001-61380000	1	61370001	61380000	9530026F06Rik	ENSMUSG00000085447	RIKEN cDNA 9530026F06 gene [Source:MGI Symbol;Acc:MGI:1924591]	overlapping	0	0.607905	0.440652	0.398765	0.504007	0.362535	0.431122
Chr1:61530001-61540000	1	61530001	61540000	null			Not found	0	0.611637	0.480942	0.533549	0.216003	0.63802	0.452602
Chr1:61620001-61630000	1	61620001	61630000	4930587A21Rik	ENSMUSG00000086009	RIKEN cDNA 4930587A21 gene [Source:MGI Symbol;Acc:MGI:1923146]	overlapping	0	0.603894	0.553371	0.513765	0.279236	0.391552	0.531299
Chr1:61660001-61670000	1	61660001	61670000	Pard3b	ENSMUSG00000052062	par-3 partitioning defective 3 homolog B (C. elegans) [Source:MGI Symbol;Acc:MGI:1919301]	overlapping	0	0.580526	0.395743	0.396899	0.179693	0.304502	0.459762
Chr1:62040001-62050000	1	62040001	62050000	Pard3b	ENSMUSG00000052062	par-3 partitioning defective 3 homolog B (C. elegans) [Source:MGI Symbol;Acc:MGI:1919301]	overlapping	0	0.572504	0.386507	0.485012	0.351237	0.248915	0.384623
Chr1:62630001-62660000	1	62630001	62660000	Pard3b	ENSMUSG00000052062	par-3 partitioning defective 3 homolog B (C. elegans) [Source:MGI Symbol;Acc:MGI:1919301]	overlapping	0	0.671331	0.462863	0.576737	0.366056	0.323846	0.372705
Chr1:62680001-62830000	1	62680001	62830000	Nrp2	ENSMUSG00000025969	neuropilin 2 [Source:MGI Symbol;Acc:MGI:1100492]	overlapping	0	0.59615	0.456605	0.499024	0.343604	0.383768	0.379736
Chr1:62870001-62880000	1	62870001	62880000	null			Not found	0	0.645103	0.514259	0.531304	0.197848	0.335965	0.230777
Chr1:62900001-62910000	1	62900001	62910000	null			Not found	0	0.696129	0.60516	0.501065	0.197848	0.519506	0.334539
Chr1:62930001-62940000	1	62930001	62940000	null			Not found	0	0.727938	0.493619	0.517866	0.251694	0.328624	0.388198
Chr1:62960001-62970000	1	62960001	62970000	Ino80d	ENSMUSG00000040865	INO80 complex subunit D [Source:MGI Symbol;Acc:MGI:3027003]	overlapping	0	0.704151	0.464826	0.54962	0.386928	0.543628	0.388207
Chr1:63020001-63040000	1	63020001	63040000	Ino80d	ENSMUSG00000040865	INO80 complex subunit D [Source:MGI Symbol;Acc:MGI:3027003]	overlapping	0	0.611707	0.380805	0.570512	0.593853	0.474757	0.31754
Chr1:63230001-63240000	1	63230001	63240000	null			Not found	0	0.601959	0.639654	0.562292	0.539698	0.391552	0.372104
Chr1:63260001-63270000	1	63260001	63270000	Gm11608	ENSMUSG00000087561	predicted gene 11608 [Source:MGI Symbol;Acc:MGI:3651337]	overlapping	0	0.588269	0.490084	0.271443	0.216003	0.217451	0.415028
Chr1:63320001-63330000	1	63320001	63330000	null			Not found	0	0.769286	0.423357	0.569764	0.458929	0.418121	0.230777
Chr1:63380001-63410000	1	63380001	63410000	null			Not found	0	0.609795	0.424143	0.546864	0.62339	0.46322	0.361369
Chr1:63440001-63450000	1	63440001	63450000	Adam23	ENSMUSG00000025964	a disintegrin and metallopeptidase domain 23 [Source:MGI Symbol;Acc:MGI:1345162]	overlapping	0	0.631553	0.445176	0.492845	0.197848	0.195776	0.329171
Chr1:63470001-63480000	1	63470001	63480000	Adam23	ENSMUSG00000025964	a disintegrin and metallopeptidase domain 23 [Source:MGI Symbol;Acc:MGI:1345162]	overlapping	0	0.57444	0.378543	0.47343	0.15277	0.381763	0.334548
Chr1:63710001-63720000	1	63710001	63720000	Mdh1b	ENSMUSG00000025963	malate dehydrogenase 1B, NAD (soluble) [Source:MGI Symbol;Acc:MGI:1923918]	overlapping	0	0.662803	0.547575	0.552963	0.83647	0.749193	0.434707
Chr1:63930001-63940000	1	63930001	63940000	null			Not found	0	0.599884	0.457946	0.45179	0.18908	0.364982	0.629711
Chr1:64190001-64230000	1	64190001	64230000	null			Not found	0	0.549236	0.547622	0.559221	0.418235	0.465842	0.49509
Chr1:64350001-64360000	1	64350001	64360000	null			Not found	0	0.603755	0.422179	0.524211	0.350618	0.444691	0.330963
Chr1:64480001-64490000	1	64480001	64490000	null			Not found	0	0.592001	0.61204	0.533549	0.395696	0.364982	0.361369
Chr1:64620001-64650000	1	64620001	64650000	null			Not found	0	0.633395	0.476686	0.43199	0.443697	0.441428	0.320828
Chr1:64730001-64750000	1	64730001	64750000	Fzd5	ENSMUSG00000045005	frizzled homolog 5 (Drosophila) [Source:MGI Symbol;Acc:MGI:108571]	overlapping	0	0.648216	0.513717	0.335847	0.265465	0.306949	0.139544
Chr1:64780001-64800000	1	64780001	64800000	Plekhm3	ENSMUSG00000051344	pleckstrin homology domain containing, family M, member 3 [Source:MGI Symbol;Acc:MGI:2443627]	overlapping	0	0.61475	0.513717	0.420604	0.251694	0.287546	0.439183
Chr1:64820001-64830000	1	64820001	64830000	Plekhm3	ENSMUSG00000051344	pleckstrin homology domain containing, family M, member 3 [Source:MGI Symbol;Acc:MGI:2443627]	overlapping	0	0.607766	0.590222	0.402875	0.413851	0.415674	0.347067
Chr1:64880001-64890000	1	64880001	64890000	Plekhm3	ENSMUSG00000051344	pleckstrin homology domain containing, family M, member 3 [Source:MGI Symbol;Acc:MGI:2443627]	overlapping	0	0.570569	0.450972	0.365163	0.413851	0.459025	0.6154
Chr1:64990001-65050000	1	64990001	65050000	U1	ENSMUSG00000077471	U1 spliceosomal RNA [Source:RFAM;Acc:RF00003]	overlapping	0	0.556809	0.47572	0.429253	0.37785	0.38992	0.327079
Chr1:65130001-65140000	1	65130001	65140000	null			Not found	0	0.792654	0.560345	0.54587	0.440774	0.309396	0.32737
Chr1:65500001-65510000	1	65500001	65510000	null			Not found	0	0.598227	0.498142	0.566411	0.360005	0.302054	0.3077
Chr1:66640001-66650000	1	66640001	66650000	Unc80	ENSMUSG00000055567	unc-80 homolog (C. elegans) [Source:MGI Symbol;Acc:MGI:2652882]	overlapping	0	0.666814	0.523401	0.44768	0.620467	0.350299	0.461546
Chr1:66670001-66680000	1	66670001	66680000	Unc80	ENSMUSG00000055567	unc-80 homolog (C. elegans) [Source:MGI Symbol;Acc:MGI:2652882]	overlapping	0	0.661007	0.44871	0.286009	0.288004	0.195776	0.262975
Chr1:67020001-67040000	1	67020001	67040000	Lancl1	ENSMUSG00000026000	LanC (bacterial lantibiotic synthetase component C)-like 1 [Source:MGI Symbol;Acc:MGI:1336997]	overlapping	0	0.595044	0.593026	0.516743	0.31962	0.453082	0.271013
Chr1:67370001-67380000	1	67370001	67380000	null			Not found	0	0.593937	0.570571	0.607097	0.278617	0.534189	0.264767
Chr1:69370001-69380000	1	69370001	69380000	null			Not found	0	0.627402	0.455684	0.337159	0.341232	0.362535	0.418631
Chr1:69650001-69660000	1	69650001	69660000	Ikzf2	ENSMUSG00000025997	IKAROS family zinc finger 2 [Source:MGI Symbol;Acc:MGI:1342541]	overlapping	0	0.615788	0.280762	0.436097	0.288004	0.222346	0.305917
Chr1:69930001-69940000	1	69930001	69940000	Spag16	ENSMUSG00000053153	sperm associated antigen 16 [Source:MGI Symbol;Acc:MGI:1913972]	overlapping	0	0.780761	0.513081	0.755338	0.323695	0.275485	0.32202
Chr1:71500001-71510000	1	71500001	71510000	null			Not found	0	0.60583	0.467088	0.51189	0.296772	0.282826	0.45081
Chr1:71610001-71650000	1	71610001	71650000	Fn1	ENSMUSG00000026193	fibronectin 1 [Source:MGI Symbol;Acc:MGI:95566]	overlapping	0	0.544916	0.486373	0.48165	0.501815	0.460336	0.442756
Chr1:72040001-72090000	1	72040001	72090000	null			Not found	0	0.580634	0.445034	0.423181	0.31305	0.324778	0.294104
Chr1:72160001-72200000	1	72160001	72200000	Mreg	ENSMUSG00000039395	melanoregulin [Source:MGI Symbol;Acc:MGI:2151839]	overlapping	0	0.654542	0.541873	0.444966	0.48366	0.542579	0.380599
Chr1:72220001-72230000	1	72220001	72230000	AC120136.3	ENSMUSG00000094655	No description	overlapping	0	0.570569	0.464826	0.320349	0.360005	0.333518	0.203939
Chr1:72280001-72310000	1	72280001	72310000	Pecr	ENSMUSG00000026189	peroxisomal trans-2-enoyl-CoA reductase [Source:MGI Symbol;Acc:MGI:2148199]	overlapping	0	0.596657	0.543412	0.449164	0.7077	0.453548	0.236145
Chr1:72380001-72470000	1	72380001	72470000	Xrcc5	ENSMUSG00000026187	X-ray repair complementing defective repair in Chinese hamster cells 5 [Source:MGI Symbol;Acc:MGI:104517]	overlapping	0	0.603695	0.517599	0.551552	0.38373	0.504822	0.47904
Chr1:72490001-72510000	1	72490001	72510000	2004-03-01	ENSMUSG00000039372	membrane-associated ring finger (C3HC4) 4 [Source:MGI Symbol;Acc:MGI:2683550]	overlapping	0	0.65506	0.494161	0.632487	0.36408	0.372149	0.336322
Chr1:72530001-72540000	1	72530001	72540000	2004-03-01	ENSMUSG00000039372	membrane-associated ring finger (C3HC4) 4 [Source:MGI Symbol;Acc:MGI:2683550]	overlapping	0	0.625606	0.45215	0.567898	0.405083	0.418121	0.372104
Chr1:72590001-72630000	1	72590001	72630000	Smarcal1	ENSMUSG00000039354	SWI/SNF related matrix associated, actin dependent regulator of chromatin, subfamily a-like 1 [Source:MGI Symbol;Acc:MGI:1859183]	overlapping	0	0.611812	0.537279	0.363104	0.348581	0.43263	0.453496
Chr1:72730001-72740000	1	72730001	72740000	null			Not found	0	0.645103	0.63169	0.543256	0.098924	0.367429	0.447226
Chr1:72780001-72870000	1	72780001	72870000	Igfbp2	ENSMUSG00000039323	insulin-like growth factor binding protein 2 [Source:MGI Symbol;Acc:MGI:96437]	overlapping	0	0.641278	0.502268	0.586816	0.416636	0.488158	0.3886
Chr1:72890001-72900000	1	72890001	72900000	null			Not found	0	0.60583	0.564964	0.51974	0.405083	0.381763	0.475866
Chr1:72950001-73020000	1	72950001	73020000	Tnp1	ENSMUSG00000026182	transition protein 1 [Source:MGI Symbol;Acc:MGI:98784]	overlapping	0	0.596742	0.464644	0.595156	0.421455	0.413227	0.518794
Chr1:73040001-73080000	1	73040001	73080000	null			Not found	0	0.652606	0.49647	0.592448	0.45439	0.438661	0.406537
Chr1:73110001-73120000	1	73110001	73120000	null			Not found	0	0.582322	0.553371	0.442821	0.314927	0.526847	0.198589
Chr1:73160001-73170000	1	73160001	73170000	null			Not found	0	0.690462	0.557989	0.709776	1.44817	0.97888	0.454377
Chr1:73210001-73220000	1	73210001	73220000	null			Not found	0	0.68244	0.506295	0.567898	0.431387	0.381763	0.423989
Chr1:73530001-73540000	1	73530001	73540000	null			Not found	0	0.674418	0.433678	0.676544	0.368773	0.582434	0.373887
Chr1:73580001-73590000	1	73580001	73590000	null			Not found	0	0.621595	0.537255	0.561183	0.539698	0.495383	0.34169
Chr1:73630001-73640000	1	73630001	73640000	null			Not found	0	0.65091	0.551109	0.63959	0.49462	0.488042	0.565316
Chr1:73820001-73860000	1	73820001	73860000	null			Not found	0	0.651154	0.531235	0.477259	0.449851	0.393912	0.270578
Chr1:73900001-74220000	1	73900001	74220000	Tns1	ENSMUSG00000055322	tensin 1 [Source:MGI Symbol;Acc:MGI:104552]	overlapping	0	0.749073	0.517289	0.551576	0.417803	0.417411	0.404808
Chr1:74260001-74430000	1	74260001	74430000	Arpc2	ENSMUSG00000006304	actin related protein 2/3 complex, subunit 2 [Source:MGI Symbol;Acc:MGI:1923959]	overlapping	0	0.69928	0.470082	0.408975	0.427	0.443807	0.297703
Chr1:74540001-74550000	1	74540001	74550000	Usp37	ENSMUSG00000033364	ubiquitin specific peptidase 37 [Source:MGI Symbol;Acc:MGI:2442483]	overlapping	0	0.66889	0.379721	0.43087	0.306159	0.582434	0.252239
Chr1:74570001-74610000	1	74570001	74610000	Zfp142	ENSMUSG00000026135	zinc finger protein 142 [Source:MGI Symbol;Acc:MGI:1924514]	overlapping	0	0.547405	0.52148	0.384665	0.526391	0.54861	0.385073
Chr1:74630001-74640000	1	74630001	74640000	Stk36	ENSMUSG00000033276	serine/threonine kinase 36 (fused homolog, Drosophila) [Source:MGI Symbol;Acc:MGI:1920831]	overlapping	0	0.659071	0.417656	0.332301	0.260462	0.360088	0.363152
Chr1:74680001-74690000	1	74680001	74690000	Ttll4	ENSMUSG00000033257	tubulin tyrosine ligase-like family, member 4 [Source:MGI Symbol;Acc:MGI:1914784]	overlapping	0	0.580387	0.399183	0.542138	0.49462	0.466366	0.34704
Chr1:74730001-74750000	1	74730001	74750000	Cyp27a1	ENSMUSG00000026170	cytochrome P450, family 27, subfamily a, polypeptide 1 [Source:MGI Symbol;Acc:MGI:88594]	overlapping	0	0.704082	0.526935	0.53281	0.21131	0.391552	0.311276
Chr1:74770001-74810000	1	74770001	74810000	Wnt6	ENSMUSG00000033227	wingless-related MMTV integration site 6 [Source:MGI Symbol;Acc:MGI:98960]	overlapping	0	0.749061	0.520302	0.458405	0.314772	0.395135	0.33856
Chr1:74850001-74980000	1	74850001	74980000	Gm16582	ENSMUSG00000089964	predicted gene 16582 [Source:MGI Symbol;Acc:MGI:4415002]	overlapping	0	0.677335	0.483839	0.455802	0.36333	0.424952	0.377603
Chr1:75000001-75020000	1	75000001	75020000	Nhej1	ENSMUSG00000026162	nonhomologous end-joining factor 1 [Source:MGI Symbol;Acc:MGI:1922820]	overlapping	0	0.604932	0.534946	0.42434	0.229464	0.314116	0.329171
Chr1:75130001-75150000	1	75130001	75150000	Slc23a3	ENSMUSG00000026205	solute carrier family 23 (nucleobase transporters), member 3 [Source:MGI Symbol;Acc:MGI:104516]	overlapping	0	0.660798	0.51883	0.37711	0.269849	0.49783	0.262993
Chr1:75170001-75270000	1	75170001	75270000	Zfand2b	ENSMUSG00000026197	zinc finger, AN1 type domain 2B [Source:MGI Symbol;Acc:MGI:1916068]	overlapping	0	0.688125	0.54029	0.458987	0.444281	0.522547	0.357434
Chr1:75290001-75320000	1	75290001	75320000	Dnpep	ENSMUSG00000026209	aspartyl aminopeptidase [Source:MGI Symbol;Acc:MGI:1278328]	overlapping	0	0.80639	0.562607	0.412579	0.59939	0.361719	0.274899
Chr1:75340001-75620000	1	75340001	75620000	Des	ENSMUSG00000026208	desmin [Source:MGI Symbol;Acc:MGI:94885]	overlapping	0	0.727863	0.52545	0.470327	0.331185	0.442506	0.334088
Chr1:75640001-75680000	1	75640001	75680000	null			Not found	0	0.642269	0.425985	0.510865	0.587123	0.503861	0.271923
Chr1:75770001-75780000	1	75770001	75780000	null			Not found	0	0.66875	0.460208	0.460001	0.548466	0.471261	0.47229
Chr1:75890001-75930000	1	75890001	75930000	null			Not found	0	0.570913	0.464508	0.475956	0.593544	0.580074	0.439631
Chr1:76060001-76070000	1	76060001	76070000	null			Not found	0	0.651049	0.635036	0.450663	0.125847	0.338413	0.325605
Chr1:77060001-77070000	1	77060001	77070000	null			Not found	0	0.651049	0.485466	0.573126	0.251694	0.500278	0.343491
Chr1:77110001-77120000	1	77110001	77120000	null			Not found	0	0.576376	0.33599	0.412951	0.576008	0.304502	0.352425
Chr1:77270001-77280000	1	77270001	77280000	null			Not found	0	0.576236	0.506201	0.508168	0.368773	0.553417	0.411471
Chr1:77340001-77350000	1	77340001	77350000	null			Not found	0	0.602098	0.357809	0.397268	0.279236	0.161865	0.271927
Chr1:77450001-77460000	1	77450001	77460000	Epha4	ENSMUSG00000026235	Eph receptor A4 [Source:MGI Symbol;Acc:MGI:98277]	overlapping	0	0.578312	0.506201	0.342387	0.296772	0.161865	0.245088
Chr1:78110001-78120000	1	78110001	78120000	Pax3	ENSMUSG00000004872	paired box gene 3 [Source:MGI Symbol;Acc:MGI:97487]	overlapping	0	0.580247	0.330194	0.507789	0.450161	0.302054	0.348823
Chr1:78220001-78230000	1	78220001	78230000	null			Not found	0	0.63736	0.600542	0.461488	0.179693	0.355194	0.348841
Chr1:78300001-78310000	1	78300001	78310000	Sgpp2	ENSMUSG00000032908	sphingosine-1-phosphate phosphotase 2 [Source:MGI Symbol;Acc:MGI:3589109]	downstream	346	0.643307	0.439474	0.355068	0.269849	0.492936	0.203948
Chr1:78340001-78350000	1	78340001	78350000	Sgpp2	ENSMUSG00000032908	sphingosine-1-phosphate phosphotase 2 [Source:MGI Symbol;Acc:MGI:3589109]	overlapping	0	0.710237	0.529291	0.438342	0.53093	0.396446	0.429348
Chr1:78390001-78410000	1	78390001	78410000	Sgpp2	ENSMUSG00000032908	sphingosine-1-phosphate phosphotase 2 [Source:MGI Symbol;Acc:MGI:3589109]	overlapping	0	0.645312	0.519961	0.518988	0.368773	0.377043	0.562628
Chr1:78510001-78520000	1	78510001	78520000	BC035947	ENSMUSG00000090486	cDNA sequence BC035947 [Source:MGI Symbol;Acc:MGI:2652858]	overlapping	0	0.609702	0.472884	0.529808	0.278617	0.439797	0.250447
Chr1:78550001-78590000	1	78550001	78590000	null			Not found	0	0.630341	0.46915	0.540455	0.806891	0.535325	0.343921
Chr1:78640001-78650000	1	78640001	78650000	null			Not found	0	0.65506	0.44871	0.446553	0.170925	0.360088	0.227202
Chr1:78690001-78710000	1	78690001	78710000	Acsl3	ENSMUSG00000032883	acyl-CoA synthetase long-chain family member 3 [Source:MGI Symbol;Acc:MGI:1921455]	overlapping	0	0.621804	0.472295	0.397832	0.229155	0.448362	0.32469
Chr1:78740001-78750000	1	78740001	78750000	null			Not found	0	0.582322	0.483204	0.427138	0.827083	0.369877	0.44546
Chr1:78810001-78820000	1	78810001	78820000	Kcne4	ENSMUSG00000047330	potassium voltage-gated channel, Isk-related subfamily, gene 4 [Source:MGI Symbol;Acc:MGI:1891125]	overlapping	0	0.57444	0.479764	0.552594	0.296772	0.413227	0.493743
Chr1:79400001-79410000	1	79400001	79410000	null			Not found	0	0.698483	0.48556	0.547736	0.49462	0.526847	0.431131
Chr1:79450001-79460000	1	79450001	79460000	null			Not found	0	0.599884	0.541779	0.465976	0.440156	0.311843	0.325596
Chr1:79620001-79630000	1	79620001	79630000	Ap1s3	ENSMUSG00000054702	adaptor-related protein complex AP-1, sigma 3 [Source:MGI Symbol;Acc:MGI:1891304]	overlapping	0	0.602098	0.360071	0.539515	1.0074	0.693606	0.611816
Chr1:79670001-79680000	1	79670001	79680000	Ap1s3	ENSMUSG00000054702	adaptor-related protein complex AP-1, sigma 3 [Source:MGI Symbol;Acc:MGI:1891304]	overlapping	0	0.621456	0.477408	0.411455	0.179693	0.468814	0.296965
Chr1:79750001-79760000	1	79750001	79760000	Wdfy1	ENSMUSG00000073643	WD repeat and FYVE domain containing 1 [Source:MGI Symbol;Acc:MGI:1916618]	overlapping	0	0.735681	0.548847	0.456639	0.468315	0.471261	0.338123
Chr1:79840001-79880000	1	79840001	79880000	Serpine2	ENSMUSG00000026249	serine (or cysteine) peptidase inhibitor, clade E, member 2 [Source:MGI Symbol;Acc:MGI:101780]	overlapping	0	0.600472	0.494113	0.488374	0.541735	0.551057	0.318881
Chr1:79900001-79910000	1	79900001	79910000	null			Not found	0	0.641231	0.375009	0.602996	0.602931	0.38421	0.323803
Chr1:79950001-79960000	1	79950001	79960000	null			Not found	0	0.639156	0.613218	0.50294	1.16017	0.500278	0.305926
Chr1:79980001-80000000	1	79980001	80000000	null			Not found	0	0.635424	0.536124	0.532981	0.337157	0.392775	0.313964
Chr1:80030001-80040000	1	80030001	80040000	null			Not found	0	0.597948	0.446354	0.561544	0.314927	0.328624	0.481233
Chr1:80160001-80170000	1	80160001	80170000	null			Not found	0	0.716323	0.602898	0.378602	0.288004	0.468814	0.30054
Chr1:80220001-80240000	1	80220001	80240000	Fam124b	ENSMUSG00000043230	family with sequence similarity 124, member B [Source:MGI Symbol;Acc:MGI:3026880]	downstream	1528	0.611018	0.572385	0.481276	0.283311	0.362535	0.272814
Chr1:80350001-80380000	1	80350001	80380000	null			Not found	0	0.518019	0.400031	0.444687	0.368773	0.443875	0.309486
Chr1:80670001-80680000	1	80670001	80680000	Dock10	ENSMUSG00000038608	dedicator of cytokinesis 10 [Source:MGI Symbol;Acc:MGI:2146320]	overlapping	0	0.568493	0.570571	0.455142	0.458929	0.357641	0.386415
Chr1:80750001-80760000	1	80750001	80760000	Dock10	ENSMUSG00000038608	dedicator of cytokinesis 10 [Source:MGI Symbol;Acc:MGI:2146320]	overlapping	0	0.660728	0.510819	0.512268	0.845857	0.463919	0.459744
Chr1:81020001-81030000	1	81020001	81030000	null			Not found	0	0.598227	0.402717	0.515252	0.522162	0.338413	0.198571
Chr1:81590001-81600000	1	81590001	81600000	null			Not found	0	0.641092	0.379627	0.449915	0.458929	0.248915	0.325587
Chr1:81740001-81750000	1	81740001	81750000	null			Not found	0	0.670825	0.529197	0.465228	0.458929	0.277932	0.364944
Chr1:82140001-82150000	1	82140001	82150000	null			Not found	0	0.66446	0.407241	0.521228	0.440774	0.521953	0.291606
Chr1:82220001-82230000	1	82220001	82230000	null			Not found	0	0.576376	0.463554	0.531313	0.773856	0.468814	0.300558
Chr1:82280001-82290000	1	82280001	82290000	Irs1	ENSMUSG00000055980	insulin receptor substrate 1 [Source:MGI Symbol;Acc:MGI:99454]	overlapping	0	0.774953	0.378543	0.39241	0.368773	0.219898	0.277277
Chr1:82340001-82360000	1	82340001	82360000	Rhbdd1	ENSMUSG00000026142	rhomboid domain containing 1 [Source:MGI Symbol;Acc:MGI:1924117]	overlapping	0	0.56559	0.444092	0.483516	0.332773	0.23563	0.268343
Chr1:82410001-82480000	1	82410001	82480000	Rhbdd1	ENSMUSG00000026142	rhomboid domain containing 1 [Source:MGI Symbol;Acc:MGI:1924117]	overlapping	0	0.600753	0.431752	0.493387	0.250618	0.353545	0.322777
Chr1:82580001-82590000	1	82580001	82590000	Col4a4	ENSMUSG00000067158	collagen, type IV, alpha 4 [Source:MGI Symbol;Acc:MGI:104687]	overlapping	0	0.601819	0.487822	0.647801	0.288004	0.635573	0.275494
Chr1:82640001-82650000	1	82640001	82650000	Col4a3	ENSMUSG00000079465	collagen, type IV, alpha 3 [Source:MGI Symbol;Acc:MGI:104688]	overlapping	0	0.641231	0.499321	0.38383	0.386928	0.251362	0.373887
Chr1:82770001-82800000	1	82770001	82800000	Tm4sf20	ENSMUSG00000026149	transmembrane 4 L six family member 20 [Source:MGI Symbol;Acc:MGI:1913511]	downstream	1540	0.602604	0.448286	0.530187	0.398619	0.458326	0.289213
Chr1:82820001-82840000	1	82820001	82840000	AC138214.1	ENSMUSG00000093782	No description	overlapping	0	0.612814	0.483793	0.398949	0.328079	0.361312	0.342582
Chr1:82940001-82980000	1	82940001	82980000	null			Not found	0	0.598985	0.42913	0.526919	0.332927	0.381851	0.467807
Chr1:83000001-83010000	1	83000001	83010000	null			Not found	0	0.731809	0.440652	0.447301	0.242926	0.135295	0.273701
Chr1:83150001-83160000	1	83150001	83160000	Wdr69	ENSMUSG00000053161	WD repeat domain 69 [Source:MGI Symbol;Acc:MGI:1923089]	overlapping	0	0.576376	0.46591	0.58843	0.539698	0.447138	0.586787
Chr1:83180001-83190000	1	83180001	83190000	Wdr69	ENSMUSG00000053161	WD repeat domain 69 [Source:MGI Symbol;Acc:MGI:1923089]	overlapping	0	0.651189	0.486644	0.474557	0.162157	0.442244	0.207514
Chr1:83800001-83810000	1	83800001	83810000	null			Not found	0	0.60597	0.373925	0.606727	0.332463	0.302054	0.336313
Chr1:84060001-84070000	1	84060001	84070000	Pid1	ENSMUSG00000045658	phosphotyrosine interaction domain containing 1 [Source:MGI Symbol;Acc:MGI:2138391]	overlapping	0	0.608045	0.433772	0.526077	0.324314	0.393999	0.420405
Chr1:84280001-84290000	1	84280001	84290000	Pid1	ENSMUSG00000045658	phosphotyrosine interaction domain containing 1 [Source:MGI Symbol;Acc:MGI:2138391]	overlapping	0	0.572504	0.60172	0.395772	0.386928	0.471261	0.429348
Chr1:84360001-84430000	1	84360001	84430000	Pid1	ENSMUSG00000045658	phosphotyrosine interaction domain containing 1 [Source:MGI Symbol;Acc:MGI:2138391]	overlapping	0	0.5373	0.511802	0.465168	0.659194	0.469563	0.414784
Chr1:84490001-84530000	1	84490001	84530000	Dner	ENSMUSG00000036766	delta/notch-like EGF-related receptor [Source:MGI Symbol;Acc:MGI:2152889]	overlapping	0	0.580387	0.573493	0.577605	0.321503	0.505085	0.349293
Chr1:84550001-84560000	1	84550001	84560000	Dner	ENSMUSG00000036766	delta/notch-like EGF-related receptor [Source:MGI Symbol;Acc:MGI:2152889]	overlapping	0	0.656857	0.527029	0.726946	0.764469	0.391552	0.50628
Chr1:84580001-84720000	1	84580001	84720000	Dner	ENSMUSG00000036766	delta/notch-like EGF-related receptor [Source:MGI Symbol;Acc:MGI:2152889]	overlapping	0	0.567526	0.473524	0.446153	0.366894	0.417223	0.27077
Chr1:84850001-84950000	1	84850001	84950000	Fbxo36	ENSMUSG00000073633	F-box protein 36 [Source:MGI Symbol;Acc:MGI:1289192]	overlapping	0	0.61948	0.465703	0.457939	0.316742	0.386658	0.305912
Chr1:85110001-85120000	1	85110001	85120000	C130026I21Rik	ENSMUSG00000052477	RIKEN cDNA C130026I21 gene [Source:MGI Symbol;Acc:MGI:3612702]	overlapping	0	0.676772	0.731734	0.50741	0.917858	0.526847	0.291606
Chr1:85610001-85620000	1	85610001	85620000	Sp140	ENSMUSG00000070031	Sp140 nuclear body protein [Source:MGI Symbol;Acc:MGI:3702467]	overlapping	0	0.589926	0.559073	0.570882	1.50263	0.700948	0.545619
Chr1:85720001-85730000	1	85720001	85730000	A630001G21Rik	ENSMUSG00000052760	RIKEN cDNA A630001G21 gene [Source:MGI Symbol;Acc:MGI:2443131]	overlapping	0	0.596012	0.46591	0.454764	0.269849	0.502725	0.323794
Chr1:85750001-85780000	1	85750001	85780000	A630001G21Rik	ENSMUSG00000052760	RIKEN cDNA A630001G21 gene [Source:MGI Symbol;Acc:MGI:2443131]	overlapping	0	0.687788	0.56677	0.541766	0.326824	0.425347	0.403701
Chr1:85890001-86070000	1	85890001	86070000	Itm2c	ENSMUSG00000026223	integral membrane protein 2C [Source:MGI Symbol;Acc:MGI:1927594]	overlapping	0	0.647562	0.495357	0.539067	0.550134	0.511154	0.371705
Chr1:86150001-86210000	1	86150001	86210000	RP24-308M3.1	ENSMUSG00000094638	No description	overlapping	0	0.600023	0.531883	0.358248	0.422825	0.487808	0.477053
Chr1:86250001-86310000	1	86250001	86310000	Armc9	ENSMUSG00000062590	armadillo repeat containing 9 [Source:MGI Symbol;Acc:MGI:1926045]	overlapping	0	0.632198	0.494538	0.442941	0.51862	0.425347	0.440677
Chr1:86380001-86450000	1	86380001	86450000	Nmur1	ENSMUSG00000026237	neuromedin U receptor 1 [Source:MGI Symbol;Acc:MGI:1341898]	overlapping	0	0.61796	0.47005	0.394014	0.317432	0.373922	0.300285
Chr1:86490001-86560000	1	86490001	86560000	Ptma	ENSMUSG00000026238	prothymosin alpha [Source:MGI Symbol;Acc:MGI:97803]	overlapping	0	0.685207	0.52264	0.354063	0.377806	0.432605	0.215187
Chr1:86580001-86620000	1	86580001	86620000	Pde6d	ENSMUSG00000026239	phosphodiesterase 6D, cGMP-specific, rod, delta [Source:MGI Symbol;Acc:MGI:1270843]	overlapping	0	0.599434	0.489813	0.325861	0.434043	0.374596	0.351968
Chr1:86640001-86680000	1	86640001	86680000	Nppc	ENSMUSG00000026241	natriuretic peptide type C [Source:MGI Symbol;Acc:MGI:97369]	overlapping	0	0.65755	0.418516	0.395216	0.274388	0.36437	0.271923
Chr1:86990001-87220000	1	86990001	87220000	Dis3l2	ENSMUSG00000053333	DIS3 mitotic control homolog (S. cerevisiae)-like 2 [Source:MGI Symbol;Acc:MGI:2442555]	overlapping	0	0.676921	0.496014	0.439444	0.393462	0.458858	0.312288
Chr1:87240001-87320000	1	87240001	87320000	Eif4e2	ENSMUSG00000026254	eukaryotic translation initiation factor 4E member 2 [Source:MGI Symbol;Acc:MGI:1914440]	overlapping	0	0.657014	0.485955	0.457057	0.451025	0.501807	0.329167
Chr1:87470001-87730000	1	87470001	87730000	3110079O15Rik	ENSMUSG00000026258	RIKEN cDNA 3110079O15 gene [Source:MGI Symbol;Acc:MGI:1920484]	overlapping	0	0.628536	0.505693	0.436013	0.542154	0.519116	0.391025
Chr1:87790001-87810000	1	87790001	87810000	Atg16l1	ENSMUSG00000026289	autophagy-related 16-like 1 (yeast) [Source:MGI Symbol;Acc:MGI:1924290]	overlapping	0	0.655959	0.458488	0.306541	0.350618	0.457976	0.502709
Chr1:87920001-87950000	1	87920001	87950000	Dgkd	ENSMUSG00000070738	diacylglycerol kinase, delta [Source:MGI Symbol;Acc:MGI:2138334]	overlapping	0	0.626251	0.48589	0.415063	0.377541	0.461588	0.429351
Chr1:88080001-88100000	1	88080001	88100000	Ugt1a10	ENSMUSG00000090165	UDP glycosyltransferase 1 family, polypeptide A10 [Source:MGI Symbol;Acc:MGI:3580642]	overlapping	0	0.585087	0.381983	0.50947	0.34185	0.350474	0.37926
Chr1:88360001-88370000	1	88360001	88370000	Trpm8	ENSMUSG00000036251	transient receptor potential cation channel, subfamily M, member 8 [Source:MGI Symbol;Acc:MGI:2181435]	overlapping	0	0.580387	0.698323	0.608972	0.521543	0.466366	0.500912
Chr1:88390001-88400000	1	88390001	88400000	Trpm8	ENSMUSG00000036251	transient receptor potential cation channel, subfamily M, member 8 [Source:MGI Symbol;Acc:MGI:2181435]	upstream	708	0.615648	0.549931	0.539894	0.440774	0.500278	0.436499
Chr1:88430001-88480000	1	88430001	88480000	null			Not found	0	0.574716	0.461801	0.466568	0.453421	0.467345	0.437221
Chr1:88510001-88530000	1	88510001	88530000	Glrp1	ENSMUSG00000062310	glutamine repeat protein 1 [Source:MGI Symbol;Acc:MGI:108038]	downstream	115	0.635285	0.448663	0.570327	0.47239	0.529294	0.514318
Chr1:88560001-88700000	1	88560001	88700000	Arl4c	ENSMUSG00000049866	ADP-ribosylation factor-like 4C [Source:MGI Symbol;Acc:MGI:2445172]	overlapping	0	0.627818	0.488455	0.539178	0.490236	0.454705	0.382705
Chr1:88730001-88830000	1	88730001	88830000	null			Not found	0	0.578298	0.504254	0.527651	0.486729	0.521533	0.355461
Chr1:88860001-88870000	1	88860001	88870000	null			Not found	0	0.7809	0.568404	0.676174	0.206616	0.338413	0.624344
Chr1:88900001-88940000	1	88900001	88940000	null			Not found	0	0.598157	0.502761	0.630254	0.577891	0.508056	0.463349
Chr1:89020001-89050000	1	89020001	89050000	null			Not found	0	0.578312	0.511604	0.54462	0.386928	0.448653	0.452596
Chr1:89070001-89090000	1	89070001	89090000	Sh3bp4	ENSMUSG00000036206	SH3-domain binding protein 4 [Source:MGI Symbol;Acc:MGI:2138297]	overlapping	0	0.730702	0.521775	0.427706	0.355311	0.563031	0.34794
Chr1:89110001-89180000	1	89110001	89180000	Sh3bp4	ENSMUSG00000036206	SH3-domain binding protein 4 [Source:MGI Symbol;Acc:MGI:2138297]	overlapping	0	0.701939	0.505595	0.487785	0.486839	0.460923	0.350124
Chr1:89230001-89320000	1	89230001	89320000	null			Not found	0	0.593677	0.532328	0.502515	0.663528	0.486837	0.36455
Chr1:89340001-89720000	1	89340001	89720000	Agap1	ENSMUSG00000055013	ArfGAP with GTPase domain, ankyrin repeat and PH domain 1 [Source:MGI Symbol;Acc:MGI:2653690]	overlapping	0	0.642123	0.505542	0.432857	0.406438	0.5121	0.372103
Chr1:89760001-89790000	1	89760001	89790000	Agap1	ENSMUSG00000055013	ArfGAP with GTPase domain, ankyrin repeat and PH domain 1 [Source:MGI Symbol;Acc:MGI:2653690]	overlapping	0	0.647225	0.479764	0.368267	0.31785	0.418937	0.411462
Chr1:89810001-89960000	1	89810001	89960000	Agap1	ENSMUSG00000055013	ArfGAP with GTPase domain, ankyrin repeat and PH domain 1 [Source:MGI Symbol;Acc:MGI:2653690]	overlapping	0	0.617604	0.450406	0.367572	0.366394	0.39619	0.41134
Chr1:89990001-90030000	1	89990001	90030000	Asb18	ENSMUSG00000067081	ankyrin repeat and SOCS box-containing 18 [Source:MGI Symbol;Acc:MGI:2655109]	overlapping	0	0.740106	0.537302	0.5118	0.301311	0.442244	0.330961
Chr1:90050001-90080000	1	90050001	90080000	Iqca	ENSMUSG00000026301	IQ motif containing with AAA domain [Source:MGI Symbol;Acc:MGI:1922168]	overlapping	0	0.700326	0.501583	0.416184	0.704365	0.57684	0.457973
Chr1:90120001-90530000	1	90120001	90530000	Iqca	ENSMUSG00000026301	IQ motif containing with AAA domain [Source:MGI Symbol;Acc:MGI:1922168]	overlapping	0	0.647637	0.49543	0.550442	0.451464	0.433828	0.355828
Chr1:90550001-90760000	1	90550001	90760000	Cops8	ENSMUSG00000034432	COP9 (constitutive photomorphogenic) homolog, subunit 8 (Arabidopsis thaliana) [Source:MGI Symbol;Acc:MGI:1915363]	overlapping	0	0.639763	0.460699	0.520871	0.728125	0.488191	0.410953
Chr1:90780001-90970000	1	90780001	90970000	Col6a3	ENSMUSG00000048126	collagen, type VI, alpha 3 [Source:MGI Symbol;Acc:MGI:88461]	overlapping	0	0.689108	0.539581	0.533017	0.429471	0.44022	0.348094
Chr1:91000001-91130000	1	91000001	91130000	Lrrfip1	ENSMUSG00000026305	leucine rich repeat (in FLII) interacting protein 1 [Source:MGI Symbol;Acc:MGI:1342770]	overlapping	0	0.653263	0.515937	0.464276	0.453684	0.493958	0.345681
Chr1:91170001-91240000	1	91170001	91240000	Rbm44	ENSMUSG00000070732	RNA binding motif protein 44 [Source:MGI Symbol;Acc:MGI:2685663]	overlapping	0	0.682283	0.540076	0.489223	0.286486	0.508868	0.292371
Chr1:91280001-91380000	1	91280001	91380000	Ube2f	ENSMUSG00000034343	ubiquitin-conjugating enzyme E2F (putative) [Source:MGI Symbol;Acc:MGI:1915171]	overlapping	0	0.789654	0.537401	0.461639	0.614391	0.485559	0.293211
Chr1:91400001-91750000	1	91400001	91750000	Hes6	ENSMUSG00000067071	hairy and enhancer of split 6 (Drosophila) [Source:MGI Symbol;Acc:MGI:1859852]	overlapping	0	0.658086	0.515876	0.49075	0.437072	0.438718	0.360446
Chr1:91770001-92040000	1	91770001	92040000	Twist2	ENSMUSG00000007805	twist homolog 2 (Drosophila) [Source:MGI Symbol;Acc:MGI:104685]	overlapping	0	0.703839	0.530469	0.528032	0.406477	0.46401	0.420337
Chr1:92100001-92110000	1	92100001	92110000	Hdac4	ENSMUSG00000026313	histone deacetylase 4 [Source:MGI Symbol;Acc:MGI:3036234]	overlapping	0	0.643307	0.547669	0.469329	0.324314	0.442244	0.429357
Chr1:92140001-92440000	1	92140001	92440000	Hdac4	ENSMUSG00000026313	histone deacetylase 4 [Source:MGI Symbol;Acc:MGI:3036234]	overlapping	0	0.701142	0.534099	0.569108	0.530452	0.460388	0.361666
Chr1:92480001-92520000	1	92480001	92520000	Olfr1416	ENSMUSG00000067064	olfactory receptor 1416 [Source:MGI Symbol;Acc:MGI:3031250]	overlapping	0	0.696788	0.529809	0.637997	1.15109	0.619928	0.34527
Chr1:92570001-93420000	1	92570001	93420000	Olfr1413	ENSMUSG00000058904	olfactory receptor 1413 [Source:MGI Symbol;Acc:MGI:3031247]	overlapping	0	0.777682	0.580497	0.531485	0.542703	0.507006	0.369305
Chr1:93520001-93540000	1	93520001	93540000	Farp2	ENSMUSG00000034066	FERM, RhoGEF and pleckstrin domain protein 2 [Source:MGI Symbol;Acc:MGI:2385126]	overlapping	0	0.601061	0.582164	0.361797	0.37816	0.542579	0.351525
Chr1:93600001-93640000	1	93600001	93640000	Farp2	ENSMUSG00000034066	FERM, RhoGEF and pleckstrin domain protein 2 [Source:MGI Symbol;Acc:MGI:2385126]	overlapping	0	0.69347	0.508804	0.342569	0.438582	0.518981	0.361819
Chr1:93670001-93700000	1	93670001	93700000	Bok	ENSMUSG00000026278	BCL2-related ovarian killer protein [Source:MGI Symbol;Acc:MGI:1858494]	overlapping	0	0.664879	0.508588	0.408595	0.35667	0.432572	0.305322
Chr1:93720001-93830000	1	93720001	93830000	Thap4	ENSMUSG00000026279	THAP domain containing 4 [Source:MGI Symbol;Acc:MGI:1914276]	overlapping	0	0.627654	0.519091	0.413528	0.547782	0.518743	0.326893
Chr1:93850001-93860000	1	93850001	93860000	D2hgdh	ENSMUSG00000073609	D-2-hydroxyglutarate dehydrogenase [Source:MGI Symbol;Acc:MGI:2138209]	overlapping	0	0.686451	0.237031	0.383081	0.296772	0.357641	0.203939
Chr1:94020001-94060000	1	94020001	94060000	Neu4	ENSMUSG00000034000	sialidase 4 [Source:MGI Symbol;Acc:MGI:2661364]	overlapping	0	0.790234	0.577546	0.638371	0.402736	0.495995	0.368076
Chr1:94110001-94120000	1	94110001	94120000	null			Not found	0	0.63736	0.600636	0.498082	0.665545	0.507619	0.379255
Chr1:94260001-94270000	1	94260001	94270000	null			Not found	0	0.60597	0.357809	0.476414	0.251694	0.38421	0.22541
Chr1:94410001-94420000	1	94410001	94420000	null			Not found	0	0.625606	0.502761	0.442073	0.423238	0.248915	0.397151
Chr1:94550001-94560000	1	94550001	94560000	null			Not found	0	0.603894	0.479764	0.579841	0.242926	0.393999	0.391783
Chr1:95910001-95920000	1	95910001	95920000	null			Not found	0	0.584119	0.338252	0.51563	0.314927	0.251362	0.347058
Chr1:96790001-96800000	1	96790001	96800000	null			Not found	0	0.609841	0.352107	0.459243	0.216003	0.415674	0.279087
Chr1:96890001-96900000	1	96890001	96900000	null			Not found	0	0.594216	0.586688	0.642194	0.216003	0.423016	0.168166
Chr1:97550001-97560000	1	97550001	97560000	null			Not found	0	0.737756	0.564869	0.54139	0.233539	0.379316	0.431131
Chr1:97670001-97680000	1	97670001	97680000	null			Not found	0	0.613713	0.319874	0.372257	0.368773	0.473708	0.309492
Chr1:97770001-97780000	1	97770001	97780000	Ppip5k2	ENSMUSG00000040648	diphosphoinositol pentakisphosphate kinase 2 [Source:MGI Symbol;Acc:MGI:2142810]	overlapping	0	0.570569	0.541873	0.355077	0.728778	0.328624	0.270135
Chr1:97920001-97930000	1	97920001	97930000	Pam	ENSMUSG00000026335	peptidylglycine alpha-amidating monooxygenase [Source:MGI Symbol;Acc:MGI:97475]	overlapping	0	0.60583	0.578724	0.509285	0.15277	0.244021	0.366736
Chr1:98020001-98030000	1	98020001	98030000	Pam	ENSMUSG00000026335	peptidylglycine alpha-amidating monooxygenase [Source:MGI Symbol;Acc:MGI:97475]	overlapping	0	0.586054	0.45903	0.369643	0.134615	0.304502	0.280879
Chr1:98080001-98090000	1	98080001	98090000	Pam	ENSMUSG00000026335	peptidylglycine alpha-amidating monooxygenase [Source:MGI Symbol;Acc:MGI:97475]	overlapping	0	0.58813	0.447532	0.556695	0.405083	0.280379	0.388189
Chr1:98160001-98170000	1	98160001	98170000	null			Not found	0	0.615648	0.569487	0.580598	0.413851	0.38421	0.483008
Chr1:98190001-98200000	1	98190001	98200000	null			Not found	0	0.613573	0.473968	0.487996	0.737546	0.700948	0.441858
Chr1:102180001-102190000	1	102180001	102190000	null			Not found	0	0.607766	0.416477	0.627259	0.881548	0.505172	0.38284
Chr1:102300001-102310000	1	102300001	102310000	null			Not found	0	0.651049	0.471706	0.451041	0.656158	0.362535	0.381038
Chr1:102740001-102750000	1	102740001	102750000	null			Not found	0	0.60597	0.515437	0.560057	0.395696	0.277932	0.468706
Chr1:102800001-102810000	1	102800001	102810000	null			Not found	0	0.576236	0.663829	0.681033	1.03494	0.72507	0.407877
Chr1:103240001-103250000	1	103240001	103250000	null			Not found	0	0.600023	0.546491	0.540642	0.890316	0.563205	0.332747
Chr1:104320001-104330000	1	104320001	104330000	null			Not found	0	0.570429	0.341692	0.402875	0.269849	0.248915	0.402509
Chr1:104400001-104410000	1	104400001	104410000	null			Not found	0	0.592001	0.525757	0.458874	0.656777	0.783104	0.34169
Chr1:104520001-104530000	1	104520001	104530000	null			Not found	0	0.58799	0.436034	0.523093	0.224771	0.432455	0.279087
Chr1:104730001-104740000	1	104730001	104740000	null			Not found	0	0.684375	0.506201	0.511142	0.216003	0.142637	0.304125
Chr1:105170001-105210000	1	105170001	105210000	null			Not found	0	0.544776	0.468808	0.534669	0.438582	0.350998	0.403412
Chr1:105250001-105390000	1	105250001	105390000	Rnf152	ENSMUSG00000047496	ring finger protein 152 [Source:MGI Symbol;Acc:MGI:2443787]	overlapping	0	0.647691	0.52815	0.577711	0.429862	0.409107	0.387691
Chr1:105410001-105440000	1	105410001	105440000	null			Not found	0	0.607121	0.499713	0.447926	0.269849	0.55027	0.515818
Chr1:105770001-105920000	1	105770001	105920000	Tnfrsf11a	ENSMUSG00000026321	tumor necrosis factor receptor superfamily, member 11a [Source:MGI Symbol;Acc:MGI:1314891]	overlapping	0	0.590886	0.523542	0.514482	0.419112	0.418075	0.372816
Chr1:105940001-105980000	1	105940001	105980000	U6	ENSMUSG00000089206	U6 spliceosomal RNA [Source:RFAM;Acc:RF00026]	overlapping	0	0.587681	0.555975	0.537095	0.548466	0.477291	0.402523
Chr1:106010001-106110000	1	106010001	106110000	Zcchc2	ENSMUSG00000038866	zinc finger, CCHC domain containing 2 [Source:MGI Symbol;Acc:MGI:2444114]	overlapping	0	0.608361	0.503241	0.486615	0.397388	0.417632	0.35958
Chr1:106130001-106160000	1	106130001	106160000	null			Not found	0	0.586147	0.534569	0.559309	0.506517	0.547707	0.378063
Chr1:106200001-106220000	1	106200001	106220000	Phlpp1	ENSMUSG00000044340	PH domain and leucine rich repeat protein phosphatase 1 [Source:MGI Symbol;Acc:MGI:2138327]	overlapping	0	0.599814	0.460797	0.438905	0.310234	0.46759	0.259404
Chr1:106270001-106280000	1	106270001	106280000	Phlpp1	ENSMUSG00000044340	PH domain and leucine rich repeat protein phosphatase 1 [Source:MGI Symbol;Acc:MGI:2138327]	overlapping	0	0.615648	0.556811	0.391292	0.314927	0.389105	0.35601
Chr1:106390001-106430000	1	106390001	106430000	Phlpp1	ENSMUSG00000044340	PH domain and leucine rich repeat protein phosphatase 1 [Source:MGI Symbol;Acc:MGI:2138327]	overlapping	0	0.63978	0.496741	0.506106	0.377541	0.348551	0.291604
Chr1:106460001-106470000	1	106460001	106470000	null			Not found	0	0.588269	0.441736	0.461118	0.45831	0.502725	0.397142
Chr1:106490001-106520000	1	106490001	106520000	null			Not found	0	0.591356	0.519662	0.505298	0.557441	0.586512	0.444866
Chr1:106540001-106620000	1	106540001	106620000	Bcl2	ENSMUSG00000057329	B cell leukemia/lymphoma 2 [Source:MGI Symbol;Acc:MGI:88138]	overlapping	0	0.630705	0.558408	0.528044	0.348503	0.350124	0.470269
Chr1:106650001-106660000	1	106650001	106660000	Bcl2	ENSMUSG00000057329	B cell leukemia/lymphoma 2 [Source:MGI Symbol;Acc:MGI:88138]	overlapping	0	0.657136	0.539517	0.564167	0.395696	0.331071	0.493743
Chr1:106680001-106700000	1	106680001	106700000	Bcl2	ENSMUSG00000057329	B cell leukemia/lymphoma 2 [Source:MGI Symbol;Acc:MGI:88138]	overlapping	0	0.714109	0.590175	0.5524	0.310543	0.454305	0.442759
Chr1:106750001-106760000	1	106750001	106760000	Kdsr	ENSMUSG00000009905	3-ketodihydrosphingosine reductase [Source:MGI Symbol;Acc:MGI:1918000]	overlapping	0	0.714109	0.585604	0.395024	0.260462	0.246468	0.339898
Chr1:106820001-106830000	1	106820001	106830000	null			Not found	0	0.625467	0.457852	0.487248	0.197848	0.425463	0.445442
Chr1:107430001-107480000	1	107430001	107480000	Serpinb7	ENSMUSG00000067001	serine (or cysteine) peptidase inhibitor, clade B, member 7 [Source:MGI Symbol;Acc:MGI:2151053]	overlapping	0	0.564067	0.469369	0.479557	0.494744	0.488671	0.339186
Chr1:107550001-107560000	1	107550001	107560000	Serpinb10	ENSMUSG00000092572	serine (or cysteine) peptidase inhibitor, clade B (ovalbumin), member 10 [Source:MGI Symbol;Acc:MGI:2138648]	upstream	730	0.625745	0.426798	0.55409	0.306159	0.439797	0.343491
Chr1:107870001-107880000	1	107870001	107880000	null			Not found	0	0.594216	0.48212	0.424903	1.19709	0.63802	0.357784
Chr1:107960001-107970000	1	107960001	107970000	null			Not found	0	0.651328	0.584426	0.49435	0.34185	0.364982	0.223626
Chr1:108180001-108190000	1	108180001	108190000	null			Not found	0	0.607766	0.554549	0.545122	0.736928	0.529294	0.307709
Chr1:109760001-109770000	1	109760001	109770000	null			Not found	0	0.657136	0.330194	0.57985	0.638622	0.558311	0.474064
Chr1:110640001-110650000	1	110640001	110650000	null			Not found	0	0.568493	0.490179	0.577596	0.952931	0.442244	0.420396
Chr1:111040001-111050000	1	111040001	111050000	null			Not found	0	0.596012	0.418739	0.532052	0.351237	0.251362	0.366736
Chr1:111750001-111760000	1	111750001	111760000	null			Not found	0	0.666954	0.566047	0.496216	0.306159	0.38421	0.304125
Chr1:111800001-111810000	1	111800001	111810000	null			Not found	0	0.570429	0.557989	0.499947	0.288004	0.31429	0.441867
Chr1:112000001-112010000	1	112000001	112010000	null			Not found	0	0.594076	0.572927	0.662736	0.360005	0.579986	0.343482
Chr1:112050001-112060000	1	112050001	112060000	null			Not found	0	0.71798	0.582164	0.639959	0.495238	0.379316	0.381047
Chr1:113350001-113360000	1	113350001	113360000	null			Not found	0	0.601959	0.485466	0.579102	0.504007	0.452033	0.508063
Chr1:113750001-113780000	1	113750001	113780000	null			Not found	0	0.488565	0.455197	0.493725	0.590415	0.510765	0.392972
Chr1:114520001-114530000	1	114520001	114530000	null			Not found	0	0.627263	0.502761	0.72508	0.332463	0.277932	0.261183
Chr1:114780001-114790000	1	114780001	114790000	null			Not found	0	0.574301	0.507379	0.530187	0.332463	0.565652	0.338123
Chr1:116230001-116240000	1	116230001	116240000	Cntnap5a	ENSMUSG00000070695	contactin associated protein-like 5A [Source:MGI Symbol;Acc:MGI:3643623]	overlapping	0	0.603894	0.398099	0.51974	0.144002	0.362535	0.366736
Chr1:116440001-116450000	1	116440001	116450000	Cntnap5a	ENSMUSG00000070695	contactin associated protein-like 5A [Source:MGI Symbol;Acc:MGI:3643623]	overlapping	0	0.586054	0.58452	0.614569	0.611699	0.43735	0.545646
Chr1:117570001-117580000	1	117570001	117580000	null			Not found	0	0.617724	0.509735	0.634353	0.584776	0.415674	0.47229
Chr1:118290001-118480000	1	118290001	118480000	Tsn	ENSMUSG00000026374	translin [Source:MGI Symbol;Acc:MGI:109263]	overlapping	0	0.612053	0.511119	0.478269	0.416984	0.433099	0.323423
Chr1:118500001-118540000	1	118500001	118540000	Clasp1	ENSMUSG00000064302	CLIP associating protein 1 [Source:MGI Symbol;Acc:MGI:1923957]	overlapping	0	0.607317	0.505364	0.412106	0.411504	0.418733	0.382835
Chr1:118560001-118570000	1	118560001	118570000	Clasp1	ENSMUSG00000064302	CLIP associating protein 1 [Source:MGI Symbol;Acc:MGI:1923957]	overlapping	0	0.584119	0.534993	0.403244	0.296772	0.355194	0.431131
Chr1:118600001-119300000	1	118600001	119300000	Clasp1	ENSMUSG00000064302	CLIP associating protein 1 [Source:MGI Symbol;Acc:MGI:1923957]	overlapping	0	0.704588	0.510209	0.54372	0.462187	0.438813	0.433594
Chr1:119320001-119560000	1	119320001	119560000	Inhbb	ENSMUSG00000037035	inhibin beta-B [Source:MGI Symbol;Acc:MGI:96571]	overlapping	0	0.705984	0.529949	0.499867	0.418652	0.441559	0.429648
Chr1:119580001-119590000	1	119580001	119590000	Epb4.1l5	ENSMUSG00000026383	erythrocyte protein band 4.1-like 5 [Source:MGI Symbol;Acc:MGI:103006]	overlapping	0	0.662943	0.770752	0.513386	0.216003	0.273038	0.252248
Chr1:119870001-119920000	1	119870001	119920000	Tmem177	ENSMUSG00000036975	transmembrane protein 177 [Source:MGI Symbol;Acc:MGI:1913593]	overlapping	0	0.681003	0.569487	0.52795	0.512651	0.381833	0.404303
Chr1:119950001-119970000	1	119950001	119970000	Gm101	ENSMUSG00000036962	predicted gene 101 [Source:MGI Symbol;Acc:MGI:2684947]	overlapping	0	0.587232	0.582164	0.448603	0.562546	0.456752	0.420409
Chr1:119990001-120170000	1	119990001	120170000	Gm101	ENSMUSG00000036962	predicted gene 101 [Source:MGI Symbol;Acc:MGI:2684947]	overlapping	0	0.705357	0.531673	0.497455	0.528219	0.531411	0.330358
Chr1:120190001-120210000	1	120190001	120210000	Steap3	ENSMUSG00000026389	STEAP family member 3 [Source:MGI Symbol;Acc:MGI:1915678]	overlapping	0	0.719018	0.586146	0.494341	0.400389	0.427736	0.384623
Chr1:120230001-120480000	1	120230001	120480000	Steap3	ENSMUSG00000026389	STEAP family member 3 [Source:MGI Symbol;Acc:MGI:1915678]	overlapping	0	0.678624	0.531216	0.566032	0.405863	0.466129	0.419619
Chr1:120500001-120560000	1	120500001	120560000	Marco	ENSMUSG00000026390	macrophage receptor with collagenous structure [Source:MGI Symbol;Acc:MGI:1309998]	overlapping	0	0.679975	0.540923	0.514009	0.455697	0.460015	0.35004
Chr1:120590001-120640000	1	120590001	120640000	En1	ENSMUSG00000058665	engrailed 1 [Source:MGI Symbol;Acc:MGI:95389]	overlapping	0	0.647066	0.459266	0.454845	0.331081	0.425813	0.471921
Chr1:120670001-120700000	1	120670001	120700000	null			Not found	0	0.55932	0.426405	0.575241	0.323489	0.476155	0.484803
Chr1:120730001-120750000	1	120730001	120750000	null			Not found	0	0.666884	0.517204	0.676923	0.310234	0.40606	0.52237
Chr1:120800001-120810000	1	120800001	120810000	null			Not found	0	0.661007	0.464732	0.58432	0.098924	0.49783	0.53311
Chr1:120850001-120860000	1	120850001	120860000	null			Not found	0	0.586054	0.511997	0.630991	0.207235	0.471261	0.524166
Chr1:121220001-121240000	1	121220001	121240000	null			Not found	0	0.57437	0.406699	0.593289	0.337466	0.387881	0.571567
Chr1:121270001-121300000	1	121270001	121300000	null			Not found	0	0.628094	0.547606	0.607478	0.626931	0.608187	0.480624
Chr1:121340001-121350000	1	121340001	121350000	null			Not found	0	0.61952	0.598186	0.618309	0.324314	0.471261	0.663692
Chr1:121370001-121380000	1	121370001	121380000	null			Not found	0	0.611916	0.487822	0.6183	0.657395	0.481049	0.615391
Chr1:121400001-121410000	1	121400001	121410000	null			Not found	0	0.617863	0.368129	0.501822	0.548466	0.389105	0.432915
Chr1:121430001-121560000	1	121430001	121560000	Ccdc93	ENSMUSG00000026339	coiled-coil domain containing 93 [Source:MGI Symbol;Acc:MGI:1918079]	overlapping	0	0.644168	0.515158	0.507439	0.610398	0.63283	0.375402
Chr1:121610001-121650000	1	121610001	121650000	null			Not found	0	0.532953	0.486055	0.510862	0.651929	0.602361	0.375689
Chr1:121700001-121710000	1	121700001	121710000	null			Not found	0	0.652706	0.655771	0.537659	0.404464	0.41078	0.400717
Chr1:125000001-125010000	1	125000001	125010000	null			Not found	0	0.597948	0.467088	0.600382	0.341232	0.193329	0.28803
Chr1:125030001-125050000	1	125030001	125050000	null			Not found	0	0.598776	0.433725	0.581531	0.292388	0.444691	0.489285
Chr1:125260001-125270000	1	125260001	125270000	null			Not found	0	0.582183	0.6086	0.573505	0.539698	0.280379	0.402518
Chr1:125460001-125510000	1	125460001	125510000	null			Not found	0	0.582626	0.553861	0.458351	0.349236	0.371695	0.264412
Chr1:125530001-125540000	1	125530001	125540000	null			Not found	0	0.568493	0.530375	0.557822	0.548466	0.333518	0.372113
Chr1:125720001-125730000	1	125720001	125730000	Gpr39	ENSMUSG00000026343	G protein-coupled receptor 39 [Source:MGI Symbol;Acc:MGI:1918361]	overlapping	0	0.580108	0.523495	0.622789	0.449542	0.224793	0.490177
Chr1:125750001-125760000	1	125750001	125760000	Gpr39	ENSMUSG00000026343	G protein-coupled receptor 39 [Source:MGI Symbol;Acc:MGI:1918361]	overlapping	0	0.670686	0.422179	0.706792	0.431387	0.49783	0.50628
Chr1:125790001-125810000	1	125790001	125810000	Gpr39	ENSMUSG00000026343	G protein-coupled receptor 39 [Source:MGI Symbol;Acc:MGI:1918361]	overlapping	0	0.670756	0.544135	0.667954	0.58916	0.389105	0.480333
Chr1:125920001-125940000	1	125920001	125940000	Nckap5	ENSMUSG00000049690	NCK-associated protein 5 [Source:MGI Symbol;Acc:MGI:2686394]	overlapping	0	0.618691	0.477997	0.562855	0.346543	0.530518	0.322912
Chr1:126110001-126120000	1	126110001	126120000	Nckap5	ENSMUSG00000049690	NCK-associated protein 5 [Source:MGI Symbol;Acc:MGI:2686394]	overlapping	0	0.653125	0.426798	0.37076	0.323695	0.420569	0.502686
Chr1:126190001-126220000	1	126190001	126220000	Nckap5	ENSMUSG00000049690	NCK-associated protein 5 [Source:MGI Symbol;Acc:MGI:2686394]	overlapping	0	0.529773	0.538433	0.539395	0.296772	0.536519	0.451414
Chr1:126450001-126460000	1	126450001	126460000	Nckap5	ENSMUSG00000049690	NCK-associated protein 5 [Source:MGI Symbol;Acc:MGI:2686394]	overlapping	0	0.609841	0.599458	0.548105	0.242926	0.38421	0.357784
Chr1:126480001-126490000	1	126480001	126490000	Nckap5	ENSMUSG00000049690	NCK-associated protein 5 [Source:MGI Symbol;Acc:MGI:2686394]	overlapping	0	0.773157	0.587866	0.437972	0.350618	0.248915	0.400726
Chr1:126540001-126550000	1	126540001	126550000	Nckap5	ENSMUSG00000049690	NCK-associated protein 5 [Source:MGI Symbol;Acc:MGI:2686394]	overlapping	0	0.572504	0.423357	0.431618	0.386928	0.442244	0.377472
Chr1:126600001-126610000	1	126600001	126610000	Nckap5	ENSMUSG00000049690	NCK-associated protein 5 [Source:MGI Symbol;Acc:MGI:2686394]	overlapping	0	0.631553	0.584426	0.467833	0.405083	0.415674	0.483017
Chr1:126640001-126650000	1	126640001	126650000	Nckap5	ENSMUSG00000049690	NCK-associated protein 5 [Source:MGI Symbol;Acc:MGI:2686394]	overlapping	0	0.594076	0.537349	0.451402	0.477084	0.43735	0.356001
Chr1:126670001-126690000	1	126670001	126690000	Nckap5	ENSMUSG00000049690	NCK-associated protein 5 [Source:MGI Symbol;Acc:MGI:2686394]	overlapping	0	0.663841	0.494655	0.497708	0.607315	0.537685	0.461555
Chr1:126730001-126750000	1	126730001	126750000	Nckap5	ENSMUSG00000049690	NCK-associated protein 5 [Source:MGI Symbol;Acc:MGI:2686394]	overlapping	0	0.599953	0.514801	0.560251	0.193464	0.2622	0.391778
Chr1:126820001-126840000	1	126820001	126840000	Nckap5	ENSMUSG00000049690	NCK-associated protein 5 [Source:MGI Symbol;Acc:MGI:2686394]	overlapping	0	0.614681	0.505659	0.579656	0.355311	0.40239	0.454399
Chr1:126860001-126870000	1	126860001	126870000	null			Not found	0	0.599884	0.424536	0.580598	0.728778	0.502725	0.629702
Chr1:126920001-126930000	1	126920001	126930000	null			Not found	0	0.629199	0.513081	0.504796	0.450161	0.38421	0.445442
Chr1:126990001-127050000	1	126990001	127050000	null			Not found	0	0.597994	0.489739	0.516997	0.316285	0.363701	0.347358
Chr1:127100001-127110000	1	127100001	127110000	null			Not found	0	0.678708	0.559167	0.567889	0.323695	0.613897	0.261192
Chr1:127130001-127140000	1	127130001	127140000	null			Not found	0	0.570569	0.6086	0.49024	0.49462	0.579986	0.250456
Chr1:127160001-127220000	1	127160001	127220000	Mgat5	ENSMUSG00000036155	mannoside acetylglucosaminyltransferase 5 [Source:MGI Symbol;Acc:MGI:894701]	overlapping	0	0.634064	0.493736	0.49814	0.308875	0.418121	0.311875
Chr1:127240001-127270000	1	127240001	127270000	Mgat5	ENSMUSG00000036155	mannoside acetylglucosaminyltransferase 5 [Source:MGI Symbol;Acc:MGI:894701]	overlapping	0	0.58495	0.516615	0.392164	0.407593	0.570314	0.375683
Chr1:127340001-127380000	1	127340001	127380000	Mgat5	ENSMUSG00000036155	mannoside acetylglucosaminyltransferase 5 [Source:MGI Symbol;Acc:MGI:894701]	overlapping	0	0.558675	0.500746	0.367675	0.406966	0.388493	0.486594
Chr1:127420001-127500000	1	127420001	127500000	Mgat5	ENSMUSG00000036155	mannoside acetylglucosaminyltransferase 5 [Source:MGI Symbol;Acc:MGI:894701]	overlapping	0	0.620368	0.549978	0.417379	0.517236	0.497262	0.367854
Chr1:127530001-127540000	1	127530001	127540000	Tmem163	ENSMUSG00000026347	transmembrane protein 163 [Source:MGI Symbol;Acc:MGI:1919410]	overlapping	0	0.706226	0.709821	0.558939	0.432006	0.584881	0.261192
Chr1:127580001-127590000	1	127580001	127590000	Tmem163	ENSMUSG00000026347	transmembrane protein 163 [Source:MGI Symbol;Acc:MGI:1919410]	overlapping	0	0.613713	0.522317	0.527582	0.764469	0.976433	0.329171
Chr1:127620001-127700000	1	127620001	127700000	Tmem163	ENSMUSG00000026347	transmembrane protein 163 [Source:MGI Symbol;Acc:MGI:1919410]	overlapping	0	0.586211	0.460491	0.493876	0.509178	0.489134	0.340569
Chr1:127750001-127760000	1	127750001	127760000	Acmsd	ENSMUSG00000026348	amino carboxymuconate semialdehyde decarboxylase [Source:MGI Symbol;Acc:MGI:2386323]	overlapping	0	0.641231	0.528113	0.563419	0.837088	0.75164	0.402527
Chr1:127850001-127860000	1	127850001	127860000	null			Not found	0	0.611777	0.61204	0.467833	0.584157	0.640467	0.327388
Chr1:127940001-127950000	1	127940001	127950000	Rab3gap1	ENSMUSG00000036104	RAB3 GTPase activating protein subunit 1 [Source:MGI Symbol;Acc:MGI:2445001]	overlapping	0	0.601959	0.523401	0.359557	0.503388	0.473708	0.558156
Chr1:128280001-128310000	1	128280001	128310000	Lct	ENSMUSG00000026354	lactase [Source:MGI Symbol;Acc:MGI:104576]	overlapping	0	0.697559	0.52461	0.460992	0.72252	0.629163	0.411459
Chr1:128420001-128430000	1	128420001	128430000	null			Not found	0	0.609841	0.518783	0.520858	0.882166	0.415674	0.30054
Chr1:128510001-128520000	1	128510001	128520000	U6	ENSMUSG00000088432	U6 spliceosomal RNA [Source:RFAM;Acc:RF00026]	overlapping	0	0.588269	0.592484	0.638832	0.377541	0.408333	0.241504
Chr1:128540001-128600000	1	128540001	128600000	Cxcr4	ENSMUSG00000045382	chemokine (C-X-C motif) receptor 4 [Source:MGI Symbol;Acc:MGI:109563]	overlapping	0	0.596082	0.507544	0.485446	0.376389	0.469221	0.374488
Chr1:128620001-128640000	1	128620001	128640000	null			Not found	0	0.604104	0.442914	0.465404	0.440465	0.407284	0.373905
Chr1:128660001-128690000	1	128660001	128690000	null			Not found	0	0.623391	0.48589	0.553835	0.368773	0.510765	0.466919
Chr1:128790001-128840000	1	128790001	128840000	null			Not found	0	0.579557	0.455609	0.499421	0.451667	0.434972	0.440439
Chr1:128870001-128880000	1	128870001	128880000	null			Not found	0	0.615788	0.447532	0.492475	0.45831	0.683818	0.479441
Chr1:128930001-128940000	1	128930001	128940000	null			Not found	0	0.601959	0.499321	0.540642	0.170925	0.389105	0.431149
Chr1:130370001-130380000	1	130370001	130380000	null			Not found	0	0.594076	0.563691	0.42639	0.701855	0.526847	0.3077
Chr1:130510001-130520000	1	130510001	130520000	Gm16083	ENSMUSG00000085526	predicted gene 16083 [Source:MGI Symbol;Acc:MGI:3802163]	overlapping	0	0.572365	0.478586	0.506662	0.377541	0.502725	0.320219
Chr1:130680001-130690000	1	130680001	130690000	Pfkfb2	ENSMUSG00000026409ption=6-phosphofructo-2-kinase/fructose-2,6-biphosphatase2 [Source:MGI Symbol;Acc:MGI:107815]	No description	overlapping	0	0.604173	0.46591	0.512638	0.971704	0.862813	0.318445
Chr1:130730001-130890000	1	130730001	130890000	AA986860	ENSMUSG00000042510	expressed sequence AA986860 [Source:MGI Symbol;Acc:MGI:2138143]	overlapping	0	0.574016	0.527212	0.516537	0.557034	0.450132	0.397818
Chr1:130940001-130950000	1	130940001	130950000	Il19	ENSMUSG00000016524	interleukin 19 [Source:MGI Symbol;Acc:MGI:1890472]	overlapping	0	0.690601	0.580986	0.590305	0.170925	0.43735	0.550978
Chr1:130990001-131020000	1	130990001	131020000	Il10	ENSMUSG00000016529	interleukin 10 [Source:MGI Symbol;Acc:MGI:96537]	overlapping	0	0.624914	0.620491	0.59416	0.536981	0.478486	0.417433
Chr1:131040001-131100000	1	131040001	131100000	Mapkapk2	ENSMUSG00000016528	MAP kinase-activated protein kinase 2 [Source:MGI Symbol;Acc:MGI:109298]	overlapping	0	0.662251	0.561429	0.488373	0.470723	0.47365	0.375981
Chr1:131120001-131140000	1	131120001	131140000	Dyrk3	ENSMUSG00000016526	dual-specificity tyrosine-(Y)-phosphorylation regulated kinase 3 [Source:MGI Symbol;Acc:MGI:1330300]	overlapping	0	0.618552	0.51023	0.431054	0.692777	0.49783	0.276399
Chr1:131170001-131300000	1	131170001	131300000	Eif2d	ENSMUSG00000026427	eukaryotic translation initiation factor 2D [Source:MGI Symbol;Acc:MGI:109342]	overlapping	0	0.683408	0.560211	0.455976	0.718859	0.590824	0.378711
Chr1:131520001-131530000	1	131520001	131530000	Srgap2	ENSMUSG00000026425	SLIT-ROBO Rho GTPase activating protein 2 [Source:MGI Symbol;Acc:MGI:109605]	overlapping	0	0.568493	0.552193	0.39652	0.233539	0.357641	0.329162
Chr1:131550001-131620000	1	131550001	131620000	Avpr1b	ENSMUSG00000026432	arginine vasopressin receptor 1B [Source:MGI Symbol;Acc:MGI:1347010]	overlapping	0	0.568177	0.526289	0.464422	0.374048	0.459524	0.34425
Chr1:131660001-131770000	1	131660001	131770000	Ctse	ENSMUSG00000004552	cathepsin E [Source:MGI Symbol;Acc:MGI:107361]	overlapping	0	0.679713	0.529544	0.501845	0.525641	0.467066	0.330794
Chr1:131800001-131810000	1	131800001	131810000	Pm20d1	ENSMUSG00000042251	peptidase M20 domain containing 1 [Source:MGI Symbol;Acc:MGI:2442939]	overlapping	0	0.707883	0.681029	0.665728	0.269849	0.683818	0.350642
Chr1:131830001-131900000	1	131830001	131900000	Slc41a1	ENSMUSG00000013275	solute carrier family 41, member 1 [Source:MGI Symbol;Acc:MGI:2444823]	overlapping	0	0.635661	0.520001	0.47269	0.29686	0.466466	0.345012
Chr1:131940001-132000000	1	131940001	132000000	Slc45a3	ENSMUSG00000026435	solute carrier family 45, member 3 [Source:MGI Symbol;Acc:MGI:1922082]	overlapping	0	0.647477	0.540365	0.385882	0.482929	0.533315	0.296971
Chr1:132040001-132070000	1	132040001	132070000	Mfsd4	ENSMUSG00000059149	major facilitator superfamily domain containing 4 [Source:MGI Symbol;Acc:MGI:2442786]	overlapping	0	0.731763	0.551078	0.41768	0.4318	0.374654	0.423986
Chr1:132100001-132410000	1	132100001	132410000	U6	ENSMUSG00000088779	U6 spliceosomal RNA [Source:RFAM;Acc:RF00026]	overlapping	0	0.659155	0.532096	0.450165	0.442511	0.470708	0.316474
Chr1:132430001-132440000	1	132430001	132440000	Dstyk	ENSMUSG00000042046	dual serine/threonine and tyrosine protein kinase [Source:MGI Symbol;Acc:MGI:1925064]	overlapping	0	0.602098	0.569487	0.488365	0.468315	0.63802	0.227202
Chr1:132460001-132470000	1	132460001	132470000	Dstyk	ENSMUSG00000042046	dual serine/threonine and tyrosine protein kinase [Source:MGI Symbol;Acc:MGI:1925064]	overlapping	0	0.676772	0.514353	0.401009	0.458929	0.335965	0.373878
Chr1:132510001-132980000	1	132510001	132980000	Cntn2	ENSMUSG00000053024	contactin 2 [Source:MGI Symbol;Acc:MGI:104518]	overlapping	0	0.725492	0.566621	0.517167	0.500333	0.511264	0.357714
Chr1:133050001-133110000	1	133050001	133110000	Pik3c2b	ENSMUSG00000026447	phosphoinositide-3-kinase, class 2, beta polypeptide [Source:MGI Symbol;Acc:MGI:2685045]	overlapping	0	0.656421	0.531734	0.347109	0.469365	0.514786	0.481226
Chr1:133130001-133140000	1	133130001	133140000	Ppp1r15b	ENSMUSG00000046062	protein phosphatase 1, regulatory (inhibitor) subunit 15b [Source:MGI Symbol;Acc:MGI:2444211]	overlapping	0	0.629478	0.553371	0.308407	0.242926	0.386658	0.338105
Chr1:133160001-133420000	1	133160001	133420000	Plekha6	ENSMUSG00000041757	pleckstrin homology domain containing, family A member 6 [Source:MGI Symbol;Acc:MGI:2388662]	overlapping	0	0.705678	0.551662	0.485226	0.438005	0.518094	0.376093
Chr1:133450001-133480000	1	133450001	133480000	null			Not found	0	0.65824	0.524642	0.509159	0.560776	0.277932	0.431137
Chr1:133500001-133510000	1	133500001	133510000	null			Not found	0	0.603894	0.557989	0.507419	0.34185	0.277932	0.288021
Chr1:133580001-133590000	1	133580001	133590000	null			Not found	0	0.688247	0.509641	0.498082	0.63924	0.449585	0.420396
Chr1:133710001-133830000	1	133710001	133830000	Atp2b4	ENSMUSG00000026463	ATPase, Ca++ transporting, plasma membrane 4 [Source:MGI Symbol;Acc:MGI:88111]	overlapping	0	0.612469	0.506888	0.471819	0.517159	0.501647	0.403712
Chr1:133850001-134110000	1	133850001	134110000	Optc	ENSMUSG00000010311	opticin [Source:MGI Symbol;Acc:MGI:2151113]	overlapping	0	0.647082	0.558205	0.492321	0.540852	0.504163	0.350633
Chr1:134130001-134330000	1	134130001	134330000	Chit1	ENSMUSG00000026450	chitinase 1 (chitotriosidase) [Source:MGI Symbol;Acc:MGI:1919134]	overlapping	0	0.7042	0.563335	0.483052	0.584807	0.507637	0.353053
Chr1:134380001-134390000	1	134380001	134390000	4933406M09Rik	ENSMUSG00000050526	RIKEN cDNA 4933406M09 gene [Source:MGI Symbol;Acc:MGI:3045320]	overlapping	0	0.592001	0.559167	0.455142	0.611699	0.391552	0.305899
Chr1:134510001-134530000	1	134510001	134530000	null			Not found	0	0.616686	0.537844	0.419292	0.332463	0.528071	0.329162
Chr1:134620001-134770000	1	134620001	134770000	Kdm5b	ENSMUSG00000042207	lysine (K)-specific demethylase 5B [Source:MGI Symbol;Acc:MGI:1922855]	overlapping	0	0.643795	0.537956	0.384199	0.363347	0.503144	0.346819
Chr1:134950001-134960000	1	134950001	134960000	Ppp1r12b	ENSMUSG00000073557	protein phosphatase 1, regulatory (inhibitor) subunit 12B [Source:MGI Symbol;Acc:MGI:1916417]	overlapping	0	0.578172	0.514259	0.266964	0.49462	0.423016	0.320219
Chr1:134980001-134990000	1	134980001	134990000	Lgr6	ENSMUSG00000042793	leucine-rich repeat-containing G protein-coupled receptor 6 [Source:MGI Symbol;Acc:MGI:2441805]	overlapping	0	0.611637	0.556811	0.514504	0.413851	0.628231	0.381056
Chr1:135010001-135270000	1	135010001	135270000	Lgr6	ENSMUSG00000042793	leucine-rich repeat-containing G protein-coupled receptor 6 [Source:MGI Symbol;Acc:MGI:2441805]	overlapping	0	0.65497	0.520608	0.429923	0.456283	0.486603	0.307288
Chr1:135300001-135390000	1	135300001	135390000	Timm17a	ENSMUSG00000062580	translocase of inner mitochondrial membrane 17a [Source:MGI Symbol;Acc:MGI:1343131]	overlapping	0	0.670994	0.509541	0.464433	0.371833	0.491382	0.357195
Chr1:135430001-135470000	1	135430001	135470000	Ipo9	ENSMUSG00000041879	importin 9 [Source:MGI Symbol;Acc:MGI:1918944]	overlapping	0	0.627851	0.506495	0.408188	0.872007	0.672455	0.425773
Chr1:135510001-136000000	1	135510001	136000000	Nav1	ENSMUSG00000009418	neuron navigator 1 [Source:MGI Symbol;Acc:MGI:2183683]	overlapping	0	0.680643	0.53289	0.481954	0.418284	0.475342	0.377249
Chr1:136020001-136260000	1	136020001	136260000	Tmem9	ENSMUSG00000026411	transmembrane protein 9 [Source:MGI Symbol;Acc:MGI:1913491]	overlapping	0	0.708346	0.567771	0.492992	0.418703	0.489891	0.383209
Chr1:136320001-136330000	1	136320001	136330000	Camsap2	ENSMUSG00000041570	calmodulin regulated spectrin-associated protein family, member 2 [Source:MGI Symbol;Acc:MGI:1922434]	overlapping	0	0.602098	0.497059	0.354338	0.270467	0.473708	0.228976
Chr1:136380001-136390000	1	136380001	136390000	null			Not found	0	0.629199	0.45215	0.502552	0.495238	0.420569	0.347058
Chr1:136440001-136460000	1	136440001	136460000	Ddx59	ENSMUSG00000026404	DEAD (Asp-Glu-Ala-Asp) box polypeptide 59 [Source:MGI Symbol;Acc:MGI:1915247]	overlapping	0	0.669997	0.486055	0.324464	0.305849	0.331071	0.348841
Chr1:136640001-136680000	1	136640001	136680000	null			Not found	0	0.600367	0.479175	0.358529	0.292388	0.415674	0.232117
Chr1:136720001-136730000	1	136720001	136730000	null			Not found	0	0.580247	0.402717	0.412203	0.718773	0.386658	0.422206
Chr1:136750001-136760000	1	136750001	136760000	AC125186.2	ENSMUSG00000096432	No description	overlapping	0	0.690601	0.483204	0.395393	0.728778	0.335965	0.22541
Chr1:136800001-136830000	1	136800001	136830000	null			Not found	0	0.587345	0.486676	0.489366	0.749855	0.474524	0.305316
Chr1:136930001-137020000	1	136930001	137020000	Nr5a2	ENSMUSG00000026398	nuclear receptor subfamily 5, group A, member 2 [Source:MGI Symbol;Acc:MGI:1346834]	overlapping	0	0.590358	0.484995	0.3608	0.340807	0.468037	0.30392
Chr1:137050001-137060000	1	137050001	137060000	null			Not found	0	0.578312	0.541873	0.461109	0.34185	0.256257	0.434707
Chr1:137170001-137180000	1	137170001	137180000	null			Not found	0	0.60583	0.511903	0.381216	0.279236	0.75164	0.479441
Chr1:137470001-137480000	1	137470001	137480000	null			Not found	0	0.568493	0.549931	0.492475	0.251694	0.333518	0.34704
Chr1:137580001-137590000	1	137580001	137590000	null			Not found	0	0.623391	0.363605	0.535045	0.323695	0.478602	0.499102
Chr1:138370001-138390000	1	138370001	138390000	null			Not found	0	0.601889	0.51711	0.476049	0.296772	0.455529	0.325587
Chr1:139310001-139320000	1	139310001	139320000	Crb1	ENSMUSG00000063681	crumbs homolog 1 (Drosophila) [Source:MGI Symbol;Acc:MGI:2136343]	overlapping	0	0.601959	0.541873	0.432366	0.144002	0.408333	0.225428
Chr1:140070001-140080000	1	140070001	140080000	null			Not found	0	0.568493	0.506295	0.542877	1.42001	0.860366	0.228994
Chr1:143310001-143320000	1	143310001	143320000	null			Not found	0	0.591862	0.576367	0.502561	0.323695	0.582434	0.384623
Chr1:143720001-143730000	1	143720001	143730000	null			Not found	0	0.621734	0.528019	0.508537	0.233539	0.41078	0.295181
Chr1:143830001-143840000	1	143830001	143840000	null			Not found	0	0.566558	0.526935	0.555189	1.30417	0.698501	0.443668
Chr1:143940001-143960000	1	143940001	143960000	null			Not found	0	0.682509	0.604524	0.623717	0.432006	0.535412	0.519681
Chr1:145520001-145530000	1	145520001	145530000	null			Not found	0	0.592001	0.516521	0.467103	1.02493	0.565652	0.225419
Chr1:146660001-146670000	1	146660001	146670000	Fam5c	ENSMUSG00000035131	family with sequence similarity 5, member C [Source:MGI Symbol;Acc:MGI:2443035]	overlapping	0	0.572365	0.463648	0.499569	0.332463	0.386658	0.236136
Chr1:149420001-149430000	1	149420001	149430000	null			Not found	0	0.635285	0.636214	0.570133	0.251694	0.219898	0.241513
Chr1:150470001-150490000	1	150470001	150490000	null			Not found	0	0.583081	0.494113	0.475116	0.395696	0.474931	0.346175
Chr1:150550001-150560000	1	150550001	150560000	null			Not found	0	0.578172	0.538433	0.644817	0.503388	0.529294	0.542053
Chr1:151040001-151050000	1	151040001	151050000	null			Not found	0	0.603894	0.510819	0.410328	0.315545	0.270591	0.196779
Chr1:151070001-151080000	1	151070001	151080000	null			Not found	0	0.698205	0.557895	0.445435	0.495238	0.333518	0.508036
Chr1:151180001-151190000	1	151180001	151190000	null			Not found	0	0.605691	0.464826	0.582473	0.306159	0.299607	0.322002
Chr1:151220001-151250000	1	151220001	151250000	null			Not found	0	0.597349	0.585572	0.461238	0.443903	0.315805	0.218859
Chr1:151280001-151330000	1	151280001	151330000	Y_RNA	ENSMUSG00000089221	Y RNA [Source:RFAM;Acc:RF00019]	overlapping	0	0.58813	0.461584	0.460887	0.343727	0.494894	0.280148
Chr1:151500001-151520000	1	151500001	151520000	Rnf2	ENSMUSG00000026484	ring finger protein 2 [Source:MGI Symbol;Acc:MGI:1101759]	overlapping	0	0.582322	0.540153	0.404177	0.368773	0.513562	0.296082
Chr1:151540001-151550000	1	151540001	151550000	null			Not found	0	0.653125	0.644272	0.459253	0.854625	0.418121	0.552797
Chr1:151570001-151580000	1	151570001	151580000	Fam129a	ENSMUSG00000026483	family with sequence similarity 129, member A [Source:MGI Symbol;Acc:MGI:2137237]	overlapping	0	0.617724	0.503939	0.461488	0.747551	0.338413	0.420396
Chr1:151640001-151720000	1	151640001	151720000	Fam129a	ENSMUSG00000026483	family with sequence similarity 129, member A [Source:MGI Symbol;Acc:MGI:2137237]	overlapping	0	0.595027	0.490096	0.461067	0.398197	0.464924	0.341912
Chr1:151750001-151760000	1	151750001	151760000	Edem3	ENSMUSG00000043019	ER degradation enhancer, mannosidase alpha-like 3 [Source:MGI Symbol;Acc:MGI:1914217]	overlapping	0	0.635564	0.540695	0.327452	0.710623	0.338413	0.384632
Chr1:151820001-151850000	1	151820001	151850000	Edem3	ENSMUSG00000043019	ER degradation enhancer, mannosidase alpha-like 3 [Source:MGI Symbol;Acc:MGI:1914217]	overlapping	0	0.611777	0.542266	0.430371	0.446619	0.345638	0.326184
Chr1:151880001-151890000	1	151880001	151890000	1700025G04Rik	ENSMUSG00000032666	RIKEN cDNA 1700025G04 gene [Source:MGI Symbol;Acc:MGI:1916649]	overlapping	0	0.582183	0.553371	0.487248	1.16955	0.502725	0.463338
Chr1:151940001-151970000	1	151940001	151970000	1700025G04Rik	ENSMUSG00000032666	RIKEN cDNA 1700025G04 gene [Source:MGI Symbol;Acc:MGI:1916649]	overlapping	0	0.618968	0.52959	0.455512	0.539904	0.474524	0.452008
Chr1:152050001-152100000	1	152050001	152100000	1700025G04Rik	ENSMUSG00000032666	RIKEN cDNA 1700025G04 gene [Source:MGI Symbol;Acc:MGI:1916649]	overlapping	0	0.605747	0.48688	0.48195	0.482221	0.496362	0.440801
Chr1:152150001-152180000	1	152150001	152180000	null			Not found	0	0.592786	0.379234	0.518367	0.263797	0.43094	0.407274
Chr1:152230001-152240000	1	152230001	152240000	null			Not found	0	0.650771	0.436034	0.582833	0.467697	0.553417	0.391774
Chr1:152260001-152300000	1	152260001	152300000	null			Not found	0	0.600402	0.419941	0.504055	0.492583	0.528682	0.442761
Chr1:152330001-152380000	1	152330001	152380000	Tsen15	ENSMUSG00000014980	tRNA splicing endonuclease 15 homolog (S. cerevisiae) [Source:MGI Symbol;Acc:MGI:1913887]	overlapping	0	0.55743	0.512647	0.519957	0.602931	0.499299	0.391421
Chr1:152430001-152460000	1	152430001	152460000	Glt25d2	ENSMUSG00000032649	glycosyltransferase 25 domain containing 2 [Source:MGI Symbol;Acc:MGI:2138232]	overlapping	0	0.574992	0.549114	0.464102	0.719597	0.581618	0.397742
Chr1:152520001-152660000	1	152520001	152660000	Rgl1	ENSMUSG00000026482	ral guanine nucleotide dissociation stimulator,-like 1 [Source:MGI Symbol;Acc:MGI:107484]	overlapping	0	0.604477	0.548521	0.475141	0.401774	0.459849	0.378745
Chr1:152680001-152710000	1	152680001	152710000	Rgl1	ENSMUSG00000026482	ral guanine nucleotide dissociation stimulator,-like 1 [Source:MGI Symbol;Acc:MGI:107484]	overlapping	0	0.573057	0.590944	0.499325	0.615034	0.365682	0.440078
Chr1:152730001-152750000	1	152730001	152750000	Rgl1	ENSMUSG00000026482	ral guanine nucleotide dissociation stimulator,-like 1 [Source:MGI Symbol;Acc:MGI:107484]	overlapping	0	0.633488	0.537891	0.438148	0.256697	0.495383	0.401609
Chr1:152780001-152840000	1	152780001	152840000	Ncf2	ENSMUSG00000026480	neutrophil cytosolic factor 2 [Source:MGI Symbol;Acc:MGI:97284]	overlapping	0	0.711066	0.543428	0.435163	0.401851	0.466832	0.316944
Chr1:152900001-152910000	1	152900001	152910000	Smg7	ENSMUSG00000042772	Smg-7 homolog, nonsense mediated mRNA decay factor (C. elegans) [Source:MGI Symbol;Acc:MGI:2682334]	overlapping	0	0.570429	0.436034	0.205728	0.170925	0.463919	0.202146
Chr1:152930001-153260000	1	152930001	153260000	Nmnat2	ENSMUSG00000042751	nicotinamide nucleotide adenylyltransferase 2 [Source:MGI Symbol;Acc:MGI:2444155]	overlapping	0	0.601037	0.529425	0.451045	0.530761	0.498339	0.381155
Chr1:153360001-153370000	1	153360001	153370000	null			Not found	0	0.582462	0.413037	0.453277	0.333082	0.49783	0.19858
Chr1:153400001-153440000	1	153400001	153440000	E330020D12Rik	ENSMUSG00000073538	Riken cDNA E330020D12 gene [Source:MGI Symbol;Acc:MGI:3761270]	overlapping	0	0.583704	0.504799	0.335102	0.386773	0.372761	0.205729
Chr1:153510001-153520000	1	153510001	153520000	Npl	ENSMUSG00000042684	N-acetylneuraminate pyruvate lyase [Source:MGI Symbol;Acc:MGI:1921341]	overlapping	0	0.719916	0.439474	0.52869	0.242926	0.463919	0.372095
Chr1:153560001-153610000	1	153560001	153610000	null			Not found	0	0.598806	0.545351	0.449089	0.451791	0.569918	0.260471
Chr1:153630001-153750000	1	153630001	153750000	Rgs8	ENSMUSG00000042671	regulator of G-protein signaling 8 [Source:MGI Symbol;Acc:MGI:108408]	overlapping	0	0.615257	0.499207	0.513977	0.505417	0.517379	0.337964
Chr1:153820001-153830000	1	153820001	153830000	Rgsl1	ENSMUSG00000042641	regulator of G-protein signaling like 1 [Source:MGI Symbol;Acc:MGI:2685048]	overlapping	0	0.570429	0.609778	0.558939	0.719391	0.650256	0.540288
Chr1:153860001-153870000	1	153860001	153870000	5830403L16Rik	ENSMUSG00000045968	RIKEN cDNA 5830403L16 gene [Source:MGI Symbol;Acc:MGI:1923273]	overlapping	0	0.635703	0.470528	0.48576	0.224771	0.473708	0.339907
Chr1:153890001-153910000	1	153890001	153910000	5830403L16Rik	ENSMUSG00000045968	RIKEN cDNA 5830403L16 gene [Source:MGI Symbol;Acc:MGI:1923273]	overlapping	0	0.674766	0.516615	0.430306	0.787008	0.374596	0.321115
Chr1:153940001-153970000	1	153940001	153970000	null			Not found	0	0.647823	0.42185	0.557939	0.374619	0.432572	0.219453
Chr1:153990001-154010000	1	153990001	154010000	null			Not found	0	0.669648	0.542462	0.481281	0.34185	0.503948	0.426664
Chr1:154030001-154040000	1	154030001	154040000	null			Not found	0	0.63736	0.595924	0.474926	0.18908	0.41078	0.311285
Chr1:154070001-154210000	1	154070001	154210000	SNORA17	ENSMUSG00000088669	Small nucleolar RNA SNORA17 [Source:RFAM;Acc:RF00560]	overlapping	0	0.605752	0.507106	0.506984	0.417697	0.375271	0.342841
Chr1:154290001-154300000	1	154290001	154300000	null			Not found	0	0.674697	0.578724	0.556325	0.602312	0.302054	0.45081
Chr1:154390001-154420000	1	154390001	154420000	Cacna1e	ENSMUSG00000004110	calcium channel, voltage-dependent, R type, alpha 1E subunit [Source:MGI Symbol;Acc:MGI:106217]	overlapping	0	0.539085	0.589012	0.447298	0.359799	0.621938	0.503878
Chr1:154600001-154610000	1	154600001	154610000	Cacna1e	ENSMUSG00000004110	calcium channel, voltage-dependent, R type, alpha 1E subunit [Source:MGI Symbol;Acc:MGI:106217]	overlapping	0	0.625467	0.660389	0.69522	0.792629	0.613897	0.252239
Chr1:154660001-154670000	1	154660001	154670000	Cacna1e	ENSMUSG00000004110	calcium channel, voltage-dependent, R type, alpha 1E subunit [Source:MGI Symbol;Acc:MGI:106217]	overlapping	0	0.680643	0.749028	0.642204	0.288004	0.331071	0.300558
Chr1:154700001-154730000	1	154700001	154730000	Cacna1e	ENSMUSG00000004110	calcium channel, voltage-dependent, R type, alpha 1E subunit [Source:MGI Symbol;Acc:MGI:106217]	overlapping	0	0.610393	0.604767	0.478661	0.419696	0.507503	0.306511
Chr1:154770001-154850000	1	154770001	154850000	null			Not found	0	0.641007	0.546309	0.542604	0.531949	0.495121	0.443217
Chr1:154880001-154890000	1	154880001	154890000	null			Not found	0	0.613573	0.415299	0.489113	0.539698	0.246468	0.393575
Chr1:154950001-155070000	1	154950001	155070000	null			Not found	0	0.609771	0.559807	0.536349	0.473697	0.518806	0.441421
Chr1:155090001-155100000	1	155090001	155100000	Ier5	ENSMUSG00000056708	immediate early response 5 [Source:MGI Symbol;Acc:MGI:1337072]	overlapping	0	0.570569	0.494702	0.512268	0.34185	0.442244	0.576016
Chr1:155130001-155140000	1	155130001	155140000	Mr1	ENSMUSG00000026471	major histocompatibility complex, class I-related [Source:MGI Symbol;Acc:MGI:1195463]	overlapping	0	0.666954	0.587866	0.601878	0.539698	0.579986	0.366736
Chr1:155160001-155170000	1	155160001	155170000	Stx6	ENSMUSG00000026470	syntaxin 6 [Source:MGI Symbol;Acc:MGI:1926235]	overlapping	0	0.654921	0.641916	0.50741	0.287385	0.34086	0.279096
Chr1:155200001-155250000	1	155200001	155250000	Stx6	ENSMUSG00000026470	syntaxin 6 [Source:MGI Symbol;Acc:MGI:1926235]	overlapping	0	0.795863	0.595236	0.369861	0.602931	0.560199	0.394647
Chr1:155460001-155470000	1	155460001	155470000	null			Not found	0	0.619799	0.6086	0.371878	0.170925	0.471261	0.228994
Chr1:155650001-155660000	1	155650001	155660000	Acbd6	ENSMUSG00000033701	acyl-Coenzyme A binding domain containing 6 [Source:MGI Symbol;Acc:MGI:1919732]	overlapping	0	0.615788	0.513175	0.439459	0.504007	0.512513	0.302341
Chr1:155700001-155850000	1	155700001	155850000	Lhx4	ENSMUSG00000026468	LIM homeobox protein 4 [Source:MGI Symbol;Acc:MGI:101776]	overlapping	0	0.644356	0.52003	0.458503	0.644756	0.558591	0.357432
Chr1:156070001-156110000	1	156070001	156110000	Fam163a	ENSMUSG00000015484	family with sequence similarity 163, member A [Source:MGI Symbol;Acc:MGI:3618859]	overlapping	0	0.663911	0.52578	0.456168	0.535314	0.540744	0.235242
Chr1:156170001-156250000	1	156170001	156250000	Fam163a	ENSMUSG00000015484	family with sequence similarity 163, member A [Source:MGI Symbol;Acc:MGI:3618859]	overlapping	0	0.584742	0.481879	0.452853	0.386773	0.528027	0.383727
Chr1:156310001-156320000	1	156310001	156320000	Nphs2	ENSMUSG00000026602	nephrosis 2 homolog, podocin (human) [Source:MGI Symbol;Acc:MGI:2157018]	overlapping	0	0.68659	0.589044	0.629134	0.467697	0.376869	0.379246
Chr1:156480001-156520000	1	156480001	156520000	null			Not found	0	0.607282	0.53008	0.417433	0.404619	0.433766	0.202153
Chr1:156640001-156690000	1	156640001	156690000	Abl2	ENSMUSG00000026596	v-abl Abelson murine leukemia viral oncogene homolog 2 (arg, Abelson-related gene) [Source:MGI Symbol;Acc:MGI:87860]	overlapping	0	0.649916	0.526247	0.348058	0.430005	0.43693	0.319507
Chr1:156730001-156790000	1	156730001	156790000	null			Not found	0	0.679054	0.571254	0.447735	0.53093	0.495441	0.308599
Chr1:156980001-156990000	1	156980001	156990000	null			Not found	0	0.621595	0.559167	0.435358	0.422619	0.275485	0.307709
Chr1:157010001-157130000	1	157010001	157130000	1700057K13Rik	ENSMUSG00000026592	RIKEN cDNA 1700057K13 gene [Source:MGI Symbol;Acc:MGI:1920685]	overlapping	0	0.599561	0.517601	0.451657	0.489557	0.479709	0.326038
Chr1:157520001-157530000	1	157520001	157530000	Sec16b	ENSMUSG00000026589	SEC16 homolog B (S. cerevisiae) [Source:MGI Symbol;Acc:MGI:2148802]	overlapping	0	0.597808	0.483204	0.33678	0.233539	0.492936	0.431122
Chr1:157550001-157570000	1	157550001	157570000	Sec16b	ENSMUSG00000026589	SEC16 homolog B (S. cerevisiae) [Source:MGI Symbol;Acc:MGI:2148802]	overlapping	0	0.579279	0.51539	0.373928	0.368773	0.442244	0.500894
Chr1:157680001-157740000	1	157680001	157740000	null			Not found	0	0.566834	0.550505	0.515378	0.409364	0.517583	0.436507
Chr1:158200001-158260000	1	158200001	158260000	Fam5b	ENSMUSG00000004031	family with sequence similarity 5, member B [Source:MGI Symbol;Acc:MGI:2443333]	overlapping	0	0.556693	0.51462	0.529255	0.448287	0.497423	0.347652
Chr1:158400001-158410000	1	158400001	158410000	Astn1	ENSMUSG00000026587	astrotactin 1 [Source:MGI Symbol;Acc:MGI:1098567]	overlapping	0	0.590065	0.478586	0.586574	0.224771	0.442244	0.536658
Chr1:158450001-158460000	1	158450001	158460000	Astn1	ENSMUSG00000026587	astrotactin 1 [Source:MGI Symbol;Acc:MGI:1098567]	overlapping	0	0.617445	0.578724	0.515252	0.467697	0.376869	0.479459
Chr1:158550001-158560000	1	158550001	158560000	Astn1	ENSMUSG00000026587	astrotactin 1 [Source:MGI Symbol;Acc:MGI:1098567]	overlapping	0	0.627542	0.537255	0.508537	0.360005	0.335965	0.339916
Chr1:158620001-158630000	1	158620001	158630000	Astn1	ENSMUSG00000026587	astrotactin 1 [Source:MGI Symbol;Acc:MGI:1098567]	overlapping	0	0.605691	0.572927	0.669829	0.197848	0.447138	0.43114
Chr1:158780001-158790000	1	158780001	158790000	Pappa2	ENSMUSG00000073530	pappalysin 2 [Source:MGI Symbol;Acc:MGI:3051647]	overlapping	0	0.631413	0.46591	0.662736	0.503388	0.333518	0.522374
Chr1:158940001-158950000	1	158940001	158950000	Pappa2	ENSMUSG00000073530	pappalysin 2 [Source:MGI Symbol;Acc:MGI:3051647]	overlapping	0	0.592001	0.464826	0.483516	0.296772	0.224793	0.445442
Chr1:158980001-159010000	1	158980001	159010000	Pappa2	ENSMUSG00000073530	pappalysin 2 [Source:MGI Symbol;Acc:MGI:3051647]	overlapping	0	0.537655	0.487398	0.56006	0.2519	0.425347	0.296367
Chr1:159040001-159050000	1	159040001	159050000	null			Not found	0	0.775093	0.501677	0.63548	0.503388	0.222346	0.300549
Chr1:159190001-159200000	1	159190001	159200000	null			Not found	0	0.58813	0.559167	0.608972	0.197848	0.357641	0.370312
Chr1:159370001-159420000	1	159370001	159420000	null			Not found	0	0.594436	0.54144	0.570887	0.552468	0.447138	0.35528
Chr1:159480001-159490000	1	159480001	159490000	null			Not found	0	0.586194	0.682207	0.615317	0.432006	0.423016	0.649372
Chr1:159530001-159540000	1	159530001	159540000	null			Not found	0	0.65506	0.587866	0.654137	0.567239	0.770868	0.588552
Chr1:159580001-159590000	1	159580001	159590000	null			Not found	0	0.603755	0.551109	0.636228	0.485852	0.471261	0.624325
Chr1:159740001-159750000	1	159740001	159750000	Tnr	ENSMUSG00000015829	tenascin R [Source:MGI Symbol;Acc:MGI:99516]	overlapping	0	0.625467	0.516615	0.591423	0.386928	0.362535	0.497328
Chr1:159880001-159890000	1	159880001	159890000	Tnr	ENSMUSG00000015829	tenascin R [Source:MGI Symbol;Acc:MGI:99516]	overlapping	0	0.578312	0.609778	0.721349	0.395696	0.604109	0.627901
Chr1:160040001-160050000	1	160040001	160050000	4930523C07Rik	ENSMUSG00000090394	RIKEN cDNA 4930523C07 gene [Source:MGI Symbol;Acc:MGI:1914897]	overlapping	0	0.611637	0.568309	0.619427	0.260462	0.548522	0.47945
Chr1:160070001-160090000	1	160070001	160090000	4930523C07Rik	ENSMUSG00000090394	RIKEN cDNA 4930523C07 gene [Source:MGI Symbol;Acc:MGI:1914897]	overlapping	0	0.582253	0.577451	0.566402	0.431697	0.538908	0.320228
Chr1:160120001-160160000	1	160120001	160160000	Tnn	ENSMUSG00000026725	tenascin N [Source:MGI Symbol;Acc:MGI:2665790]	overlapping	0	0.618657	0.518582	0.507415	0.441083	0.369178	0.374333
Chr1:161290001-161300000	1	161290001	161300000	null			Not found	0	0.688526	0.551109	0.617183	1.31294	0.947416	0.347058
Chr1:161370001-161380000	1	161370001	161380000	null			Not found	0	0.645103	0.585604	0.732183	0.638622	0.309396	0.533101
Chr1:161420001-161430000	1	161420001	161430000	Tnfsf4	ENSMUSG00000026700	tumor necrosis factor (ligand) superfamily, member 4 [Source:MGI Symbol;Acc:MGI:104511]	upstream	1591	0.586054	0.390041	0.530196	0.549085	0.360088	0.529516
Chr1:161590001-161600000	1	161590001	161600000	null			Not found	0	0.627542	0.516615	0.470835	0.890935	0.553417	0.506262
Chr1:161620001-161630000	1	161620001	161630000	null			Not found	0	0.607905	0.536077	0.487257	0.87278	0.466366	0.377472
Chr1:161740001-161760000	1	161740001	161760000	null			Not found	0	0.629547	0.580938	0.50517	0.445158	0.34558	0.378368
Chr1:162450001-162460000	1	162450001	162460000	Dnm3	ENSMUSG00000040265	dynamin 3 [Source:MGI Symbol;Acc:MGI:1341299]	overlapping	0	0.619938	0.423357	0.480145	0.404464	0.45448	0.447235
Chr1:162540001-162550000	1	162540001	162550000	Mettl13	ENSMUSG00000026694	methyltransferase like 13 [Source:MGI Symbol;Acc:MGI:1918699]	overlapping	0	0.60583	0.646534	0.342387	0.467697	0.418121	0.282663
Chr1:162620001-162630000	1	162620001	162630000	Gm5705	ENSMUSG00000091743	predicted gene 5705 [Source:MGI Symbol;Acc:MGI:3643224]	overlapping	0	0.631274	0.354369	0.390914	0.261081	0.488042	0.227202
Chr1:162650001-162660000	1	162650001	162660000	7420461P10Rik	ENSMUSG00000091060	RIKEN cDNA 7420461P10 gene [Source:MGI Symbol;Acc:MGI:3642786]	overlapping	0	0.66875	0.551015	0.46073	0.693087	0.275485	0.384632
Chr1:162810001-162820000	1	162810001	162820000	Fmo4	ENSMUSG00000026692	flavin containing monooxygenase 4 [Source:MGI Symbol;Acc:MGI:2429497]	overlapping	0	0.649114	0.440652	0.509655	0.197848	0.306949	0.2129
Chr1:162940001-162950000	1	162940001	162950000	null			Not found	0	0.58813	0.432594	0.505923	0.504007	0.41078	0.257625
Chr1:163640001-163650000	1	163640001	163650000	null			Not found	0	0.604034	0.475146	0.523481	0.359386	0.408333	0.279069
Chr1:164070001-164080000	1	164070001	164080000	Sell	ENSMUSG00000026581	selectin, lymphocyte [Source:MGI Symbol;Acc:MGI:98279]	overlapping	0	0.586194	0.490084	0.608214	0.458929	0.468814	0.30054
Chr1:164150001-164180000	1	164150001	164180000	Selp	ENSMUSG00000026580	selectin, platelet [Source:MGI Symbol;Acc:MGI:98280]	overlapping	0	0.526547	0.485529	0.556575	0.320772	0.302054	0.339306
Chr1:164360001-164370000	1	164360001	164370000	null			Not found	0	0.61952	0.554549	0.53728	0.594163	0.746746	0.384632
Chr1:164440001-164480000	1	164440001	164480000	Atp1b1	ENSMUSG00000026576	ATPase, Na+/K+ transporting, beta 1 polypeptide [Source:MGI Symbol;Acc:MGI:88108]	overlapping	0	0.603964	0.516591	0.48501	0.485697	0.49783	0.371201
Chr1:164810001-164820000	1	164810001	164820000	Dpt	ENSMUSG00000026574	dermatopontin [Source:MGI Symbol;Acc:MGI:1928392]	overlapping	0	0.572365	0.6086	0.563419	0.233539	0.389105	0.45081
Chr1:164890001-164900000	1	164890001	164900000	null			Not found	0	0.595733	0.461386	0.476414	0.350618	0.333518	0.41148
Chr1:165010001-165020000	1	165010001	165020000	null			Not found	0	0.605691	0.607422	0.639211	0.422619	0.468814	0.234362
Chr1:165040001-165110000	1	165040001	165110000	null			Not found	0	0.562587	0.486644	0.499252	0.385499	0.464718	0.312556
Chr1:165140001-165210000	1	165140001	165210000	Tbx19	ENSMUSG00000026572	T-box 19 [Source:MGI Symbol;Acc:MGI:1891158]	overlapping	0	0.523807	0.438477	0.413801	0.457676	0.438099	0.334282
Chr1:165300001-165320000	1	165300001	165320000	Gpr161	ENSMUSG00000040836	G protein-coupled receptor 161 [Source:MGI Symbol;Acc:MGI:2685054]	overlapping	0	0.743633	0.586735	0.531494	0.418235	0.397495	0.401609
Chr1:165480001-165490000	1	165480001	165490000	Brp44	ENSMUSG00000026568	brain protein 44 [Source:MGI Symbol;Acc:MGI:1917706]	overlapping	0	0.57444	0.578724	0.409968	0.422619	0.280379	0.330963
Chr1:165540001-165570000	1	165540001	165570000	Adcy10	ENSMUSG00000026567	adenylate cyclase 10 [Source:MGI Symbol;Acc:MGI:2660854]	overlapping	0	0.609149	0.530736	0.53305	0.599802	0.569498	0.389982
Chr1:165650001-165750000	1	165650001	165750000	Rcsd1	ENSMUSG00000040723	RCSD domain containing 1 [Source:MGI Symbol;Acc:MGI:2676394]	overlapping	0	0.593025	0.515654	0.441735	0.451543	0.481189	0.27836
Chr1:165780001-165860000	1	165780001	165860000	Gm16565	ENSMUSG00000089829	predicted gene 16565 [Source:MGI Symbol;Acc:MGI:4414985]	overlapping	0	0.700781	0.53524	0.440625	0.418312	0.414189	0.27058
Chr1:166030001-166070000	1	166030001	166070000	null			Not found	0	0.600886	0.541873	0.490799	0.66539	0.531042	0.281307
Chr1:166090001-166190000	1	166090001	166190000	Dusp27	ENSMUSG00000026564	dual specificity phosphatase 27 (putative) [Source:MGI Symbol;Acc:MGI:2685055]	overlapping	0	0.637027	0.486437	0.483818	0.548714	0.458465	0.362798
Chr1:166280001-166300000	1	166280001	166300000	Ildr2	ENSMUSG00000040612	immunoglobulin-like domain containing receptor 2 [Source:MGI Symbol;Acc:MGI:1196370]	overlapping	0	0.610809	0.498731	0.543819	0.449542	0.382987	0.459767
Chr1:166390001-166410000	1	166390001	166410000	Tada1	ENSMUSG00000026563	transcriptional adaptor 1 [Source:MGI Symbol;Acc:MGI:1196415]	overlapping	0	0.607836	0.594746	0.435169	0.413542	0.66826	0.49554
Chr1:166940001-166950000	1	166940001	166950000	null			Not found	0	0.627402	0.413037	0.596641	0.216003	0.328624	0.177109
Chr1:167010001-167070000	1	167010001	167070000	Fam78b	ENSMUSG00000060568	family with sequence similarity 78, member B [Source:MGI Symbol;Acc:MGI:2443050]	overlapping	0	0.629408	0.539399	0.55222	0.54293	0.517991	0.41385
Chr1:167120001-167150000	1	167120001	167150000	null			Not found	0	0.551392	0.47934	0.454148	0.668468	0.526847	0.427553
Chr1:167220001-167270000	1	167220001	167270000	Uck2	ENSMUSG00000053664	uridine-cytidine kinase 2 [Source:MGI Symbol;Acc:MGI:1931744]	overlapping	0	0.659706	0.516125	0.422882	0.401575	0.48965	0.259401
Chr1:167300001-167310000	1	167300001	167310000	Tmco1	ENSMUSG00000052428	transmembrane and coiled-coil domains 1 [Source:MGI Symbol;Acc:MGI:1921173]	overlapping	0	0.619659	0.404979	0.360674	0.485852	0.280379	0.275503
Chr1:167340001-167350000	1	167340001	167350000	mmu-mir-2134-1	ENSMUSG00000088246	mmu-mir-2134-1 [Source:miRBase;Acc:MI0010740]	overlapping	0	0.755317	0.524579	0.431996	0.242926	0.277932	0.298757
Chr1:167380001-167390000	1	167380001	167390000	Mgst3	ENSMUSG00000026688	microsomal glutathione S-transferase 3 [Source:MGI Symbol;Acc:MGI:1913697]	overlapping	0	0.727938	0.513081	0.540633	0.386928	0.715282	0.49196
Chr1:167440001-167450000	1	167440001	167450000	Lrrc52	ENSMUSG00000040485	leucine rich repeat containing 52 [Source:MGI Symbol;Acc:MGI:1924118]	overlapping	0	0.603894	0.477408	0.423776	0.314927	0.389105	0.427556
Chr1:167490001-167500000	1	167490001	167500000	null			Not found	0	0.63736	0.530375	0.467085	0.333082	0.306949	0.271927
Chr1:167550001-167570000	1	167550001	167570000	null			Not found	0	0.662943	0.436081	0.484079	0.809547	0.720176	0.411448
Chr1:167590001-167680000	1	167590001	167680000	Rxrg	ENSMUSG00000015843	retinoid X receptor gamma [Source:MGI Symbol;Acc:MGI:98216]	overlapping	0	0.628387	0.490477	0.500069	0.363833	0.412722	0.420803
Chr1:167720001-167770000	1	167720001	167770000	Lmx1a	ENSMUSG00000026686	LIM homeobox transcription factor 1 alpha [Source:MGI Symbol;Acc:MGI:1888519]	overlapping	0	0.594048	0.52391	0.573575	0.360005	0.328204	0.387485
Chr1:167790001-167800000	1	167790001	167800000	Lmx1a	ENSMUSG00000026686	LIM homeobox transcription factor 1 alpha [Source:MGI Symbol;Acc:MGI:1888519]	overlapping	0	0.566558	0.391125	0.451032	0.432006	0.408333	0.261183
Chr1:167840001-167850000	1	167840001	167850000	Lmx1a	ENSMUSG00000026686	LIM homeobox transcription factor 1 alpha [Source:MGI Symbol;Acc:MGI:1888519]	overlapping	0	0.656857	0.408419	0.480533	0.34185	0.304502	0.468715
Chr1:167870001-167880000	1	167870001	167880000	null			Not found	0	0.60583	0.727116	0.541399	0.485852	0.302054	0.47945
Chr1:167920001-167940000	1	167920001	167940000	null			Not found	0	0.636253	0.484924	0.553711	0.575389	0.796389	0.406976
Chr1:168130001-168140000	1	168130001	168140000	null			Not found	0	0.594076	0.389947	0.521228	0.485852	0.514611	0.493761
Chr1:168230001-168240000	1	168230001	168240000	Pbx1	ENSMUSG00000052534	pre B cell leukemia homeobox 1 [Source:MGI Symbol;Acc:MGI:97495]	overlapping	0	0.603894	0.542957	0.437224	0.477084	0.529294	0.524148
Chr1:168350001-168360000	1	168350001	168360000	Pbx1	ENSMUSG00000052534	pre B cell leukemia homeobox 1 [Source:MGI Symbol;Acc:MGI:97495]	overlapping	0	0.576236	0.566047	0.621284	0.53093	0.447138	0.558156
Chr1:168380001-168390000	1	168380001	168390000	Pbx1	ENSMUSG00000052534	pre B cell leukemia homeobox 1 [Source:MGI Symbol;Acc:MGI:97495]	overlapping	0	0.615788	0.724759	0.5455	0.504007	0.432455	0.499102
Chr1:168470001-168480000	1	168470001	168480000	null			Not found	0	0.566558	0.484382	0.522724	0.323695	0.41078	0.259399
Chr1:169580001-169590000	1	169580001	169590000	null			Not found	0	0.739413	0.529197	0.51974	0.458929	0.439797	0.41682
Chr1:169910001-169920000	1	169910001	169920000	null			Not found	0	0.578312	0.424536	0.445435	0.278617	0.302054	0.388198
Chr1:170290001-170330000	1	170290001	170330000	Gm7694	ENSMUSG00000096603	predicted gene 7694 [Source:MGI Symbol;Acc:MGI:3649135]	overlapping	0	0.632935	0.510253	0.460088	0.555506	0.498442	0.432041
Chr1:170350001-170360000	1	170350001	170360000	Nos1ap	ENSMUSG00000038473	nitric oxide synthase 1 (neuronal) adaptor protein [Source:MGI Symbol;Acc:MGI:1917979]	overlapping	0	0.619659	0.551109	0.402126	0.458929	0.500278	0.595721
Chr1:170450001-170480000	1	170450001	170480000	Nos1ap	ENSMUSG00000038473	nitric oxide synthase 1 (neuronal) adaptor protein [Source:MGI Symbol;Acc:MGI:1917979]	overlapping	0	0.602511	0.440683	0.423776	0.263797	0.376985	0.218847
Chr1:170500001-170560000	1	170500001	170560000	Nos1ap	ENSMUSG00000038473	nitric oxide synthase 1 (neuronal) adaptor protein [Source:MGI Symbol;Acc:MGI:1917979]	overlapping	0	0.602973	0.496061	0.538906	0.350721	0.391494	0.446645
Chr1:170640001-170710000	1	170640001	170710000	Olfml2b	ENSMUSG00000038463	olfactomedin-like 2B [Source:MGI Symbol;Acc:MGI:2443310]	overlapping	0	0.669896	0.550436	0.5351	0.447125	0.448187	0.360606
Chr1:170900001-170910000	1	170900001	170910000	Fcrlb	ENSMUSG00000070524	Fc receptor-like B [Source:MGI Symbol;Acc:MGI:3576487]	overlapping	0	0.607905	0.439474	0.295716	0.539698	0.471261	0.332738
Chr1:170960001-171000000	1	170960001	171000000	Fcgr2b	ENSMUSG00000026656	Fc receptor, IgG, low affinity IIb [Source:MGI Symbol;Acc:MGI:95499]	overlapping	0	0.630376	0.517451	0.543815	0.503543	0.475456	0.344826
Chr1:171020001-171030000	1	171020001	171030000	Fcgr4	ENSMUSG00000059089	Fc receptor, IgG, low affinity IV [Source:MGI Symbol;Acc:MGI:2179523]	overlapping	0	0.619799	0.542957	0.504418	0.88093	0.613897	0.39716
Chr1:171110001-171120000	1	171110001	171120000	1700009P17Rik	ENSMUSG00000026649	RIKEN cDNA 1700009P17 gene [Source:MGI Symbol;Acc:MGI:1922722]	overlapping	0	0.580247	0.358893	0.300565	0.234158	0.275485	0.236136
Chr1:171170001-171290000	1	171170001	171290000	Pcp4l1	ENSMUSG00000038370	Purkinje cell protein 4-like 1 [Source:MGI Symbol;Acc:MGI:1913675]	overlapping	0	0.622298	0.485596	0.428912	0.446877	0.454567	0.286534
Chr1:171360001-171460000	1	171360001	171460000	Klhdc9	ENSMUSG00000045259	kelch domain containing 9 [Source:MGI Symbol;Acc:MGI:1916124]	overlapping	0	0.613104	0.447984	0.449428	0.405588	0.430183	0.361721
Chr1:171500001-171510000	1	171500001	171510000	B930036N10Rik	ENSMUSG00000091993	RIKEN cDNA B930036N10 gene [Source:MGI Symbol;Acc:MGI:3702496]	overlapping	0	0.737617	0.464826	0.582085	0.728778	0.889382	0.191429
Chr1:171560001-171570000	1	171560001	171570000	Cd244	ENSMUSG00000004709	CD244 natural killer cell receptor 2B4 [Source:MGI Symbol;Acc:MGI:109294]	overlapping	0	0.586333	0.700585	0.546618	1.4394	1.17431	0.211099
Chr1:171610001-171640000	1	171610001	171640000	Slamf7	ENSMUSG00000038179	SLAM family member 7 [Source:MGI Symbol;Acc:MGI:1922595]	overlapping	0	0.54766	0.432986	0.545747	0.737752	0.552601	0.326193
Chr1:171760001-171780000	1	171760001	171780000	Slamf1	ENSMUSG00000015316	signaling lymphocytic activation molecule family member 1 [Source:MGI Symbol;Acc:MGI:1351314]	overlapping	0	0.630445	0.474557	0.475494	0.265465	0.329848	0.232565
Chr1:171880001-171890000	1	171880001	171890000	Cd84	ENSMUSG00000038147	CD84 antigen [Source:MGI Symbol;Acc:MGI:1336885]	overlapping	0	0.580247	0.638382	0.470825	0.863393	0.579986	0.339907
Chr1:172000001-172080000	1	172000001	172080000	Vangl2	ENSMUSG00000026556	vang-like 2 (van gogh, Drosophila) [Source:MGI Symbol;Acc:MGI:2135272]	overlapping	0	0.657048	0.440493	0.37034	0.30358	0.344094	0.328501
Chr1:172200001-172220000	1	172200001	172220000	Pea15a	ENSMUSG00000013698	phosphoprotein enriched in astrocytes 15A [Source:MGI Symbol;Acc:MGI:104799]	overlapping	0	0.60583	0.529833	0.435354	0.292388	0.364982	0.338119
Chr1:172240001-172250000	1	172240001	172250000	Atp1a4	ENSMUSG00000007107	ATPase, Na+/K+ transporting, alpha 4 polypeptide [Source:MGI Symbol;Acc:MGI:1351335]	overlapping	0	0.688665	0.606244	0.483895	0.30554	0.270591	0.422197
Chr1:172270001-172380000	1	172270001	172380000	Igsf8	ENSMUSG00000038034	immunoglobulin superfamily, member 8 [Source:MGI Symbol;Acc:MGI:2154090]	overlapping	0	0.655777	0.526605	0.446453	0.387669	0.40579	0.35942
Chr1:172420001-172600000	1	172420001	172600000	Slamf9	ENSMUSG00000026548	SLAM family member 9 [Source:MGI Symbol;Acc:MGI:1923692]	overlapping	0	0.682195	0.527503	0.457256	0.401364	0.398078	0.340496
Chr1:172620001-172640000	1	172620001	172640000	Dusp23	ENSMUSG00000026544	dual specificity phosphatase 23 [Source:MGI Symbol;Acc:MGI:1915690]	overlapping	0	0.611847	0.557989	0.552963	1.01147	0.592048	0.31844
Chr1:173330001-173350000	1	173330001	173350000	Darc	ENSMUSG00000037872	Duffy blood group, chemokine receptor [Source:MGI Symbol;Acc:MGI:1097689]	overlapping	0	0.615788	0.459619	0.557447	0.386928	0.362535	0.438296
Chr1:174560001-174570000	1	174560001	174570000	Fmn2	ENSMUSG00000028354	formin 2 [Source:MGI Symbol;Acc:MGI:1859252]	overlapping	0	0.566558	0.585604	0.387192	0.144002	0.463919	0.361351
Chr1:175360001-175370000	1	175360001	175370000	Rgs7	ENSMUSG00000026527	regulator of G protein signaling 7 [Source:MGI Symbol;Acc:MGI:1346089]	overlapping	0	0.607627	0.494702	0.572387	0.458929	0.447138	0.425764
Chr1:175600001-175630000	1	175600001	175630000	Fh1	ENSMUSG00000026526	fumarate hydratase 1 [Source:MGI Symbol;Acc:MGI:95530]	overlapping	0	0.537103	0.41376	0.294842	0.507136	0.468814	0.475268
Chr1:175690001-175700000	1	175690001	175700000	Opn3	ENSMUSG00000026525	opsin 3 [Source:MGI Symbol;Acc:MGI:1338022]	overlapping	0	0.596152	0.486644	0.446183	0.180312	0.326177	0.203957
Chr1:175740001-175750000	1	175740001	175750000	Wdr64	ENSMUSG00000026523	WD repeat domain 64 [Source:MGI Symbol;Acc:MGI:1923070]	overlapping	0	0.595873	0.580986	0.524202	0.30554	0.502725	0.305917
Chr1:175830001-175840000	1	175830001	175840000	null			Not found	0	0.586333	0.475052	0.636597	0.360005	0.280379	0.368529
Chr1:175910001-175940000	1	175910001	175940000	Exo1	ENSMUSG00000039748	exonuclease 1 [Source:MGI Symbol;Acc:MGI:1349427]	overlapping	0	0.645655	0.480581	0.441821	0.320772	0.451101	0.365539
Chr1:176040001-176050000	1	176040001	176050000	Pld5	ENSMUSG00000055214	phospholipase D family, member 5 [Source:MGI Symbol;Acc:MGI:2442056]	overlapping	0	0.597808	0.478586	0.594406	0.251694	0.304502	0.298766
Chr1:176070001-176080000	1	176070001	176080000	Pld5	ENSMUSG00000055214	phospholipase D family, member 5 [Source:MGI Symbol;Acc:MGI:2442056]	overlapping	0	0.62381	0.556811	0.563049	0.323695	0.362535	0.398952
Chr1:176610001-176620000	1	176610001	176620000	null			Not found	0	0.588269	0.572927	0.556704	1.00678	0.609003	0.357802
Chr1:176680001-176700000	1	176680001	176700000	U6	ENSMUSG00000087875	U6 spliceosomal RNA [Source:RFAM;Acc:RF00026]	downstream	617	0.580317	0.532637	0.518059	0.674313	0.529294	0.427551
Chr1:176820001-176830000	1	176820001	176830000	Sdccag8	ENSMUSG00000026504	serologically defined colon cancer antigen 8 [Source:MGI Symbol;Acc:MGI:1924066]	overlapping	0	0.625327	0.577546	0.535424	1.02555	0.471261	0.400726
Chr1:176960001-177020000	1	176960001	177020000	Sdccag8	ENSMUSG00000026504	serologically defined colon cancer antigen 8 [Source:MGI Symbol;Acc:MGI:1924066]	overlapping	0	0.639502	0.557793	0.471511	0.454442	0.371799	0.326487
Chr1:177330001-177340000	1	177330001	177340000	null			Not found	0	0.613852	0.561429	0.467085	0.386928	0.326177	0.261192
Chr1:177400001-177410000	1	177400001	177410000	null			Not found	0	0.580247	0.613218	0.576479	0.512775	0.328624	0.36852
Chr1:177460001-177480000	1	177460001	177480000	null			Not found	0	0.633349	0.461928	0.619422	0.440774	0.558311	0.392675
Chr1:177500001-177520000	1	177500001	177520000	null			Not found	0	0.60597	0.385423	0.526266	0.242926	0.478428	0.36584
Chr1:177570001-177600000	1	177570001	177600000	null			Not found	0	0.580294	0.441013	0.587811	0.4558	0.358457	0.341098
Chr1:177620001-177650000	1	177620001	177650000	null			Not found	0	0.600622	0.497875	0.482272	0.275901	0.407634	0.378057
Chr1:177670001-177680000	1	177670001	177680000	null			Not found	0	0.607905	0.399183	0.658626	0.448924	0.463919	0.40966
Chr1:177700001-177740000	1	177700001	177740000	1700016C15Rik	ENSMUSG00000015962	RIKEN cDNA 1700016C15 gene [Source:MGI Symbol;Acc:MGI:1916678]	overlapping	0	0.597499	0.484653	0.52459	0.489927	0.438661	0.34885
Chr1:178290001-178300000	1	178290001	178300000	null			Not found	0	0.58799	0.546585	0.459613	0.287385	0.589775	0.202173
Chr1:178360001-178370000	1	178360001	178370000	null			Not found	0	0.619799	0.489	0.408093	0.386928	0.463919	0.241513
Chr1:178470001-178490000	1	178470001	178490000	Efcab2	ENSMUSG00000026495	EF-hand calcium binding domain 2 [Source:MGI Symbol;Acc:MGI:1915476]	overlapping	0	0.561509	0.461881	0.529254	0.260462	0.413227	0.332742
Chr1:178510001-178520000	1	178510001	178520000	null			Not found	0	0.580387	0.453328	0.437594	0.405083	0.360088	0.180675
Chr1:178540001-178560000	1	178540001	178560000	Kif26b	ENSMUSG00000026494	kinesin family member 26B [Source:MGI Symbol;Acc:MGI:2447076]	overlapping	0	0.596012	0.518877	0.582644	0.611699	0.303278	0.559043
Chr1:178610001-178680000	1	178610001	178680000	Kif26b	ENSMUSG00000026494	kinesin family member 26B [Source:MGI Symbol;Acc:MGI:2447076]	overlapping	0	0.610848	0.474837	0.539951	0.418861	0.337314	0.463591
Chr1:178710001-178720000	1	178710001	178720000	Kif26b	ENSMUSG00000026494	kinesin family member 26B [Source:MGI Symbol;Acc:MGI:2447076]	overlapping	0	0.621595	0.441736	0.556325	0.485233	0.604109	0.563524
Chr1:178750001-178760000	1	178750001	178760000	Kif26b	ENSMUSG00000026494	kinesin family member 26B [Source:MGI Symbol;Acc:MGI:2447076]	overlapping	0	0.603755	0.45559	0.563419	0.899703	0.72507	0.474064
Chr1:178820001-178830000	1	178820001	178830000	Kif26b	ENSMUSG00000026494	kinesin family member 26B [Source:MGI Symbol;Acc:MGI:2447076]	overlapping	0	0.60583	0.483204	0.457387	0.440774	0.529294	0.327379
Chr1:178850001-178870000	1	178850001	178870000	Kif26b	ENSMUSG00000026494	kinesin family member 26B [Source:MGI Symbol;Acc:MGI:2447076]	overlapping	0	0.705119	0.48728	0.542134	0.314618	0.486993	0.384623
Chr1:178890001-178940000	1	178890001	178940000	Kif26b	ENSMUSG00000026494	kinesin family member 26B [Source:MGI Symbol;Acc:MGI:2447076]	overlapping	0	0.643167	0.475382	0.52108	0.444529	0.493495	0.422552
Chr1:179000001-179010000	1	179000001	179010000	Smyd3	ENSMUSG00000055067	SET and MYND domain containing 3 [Source:MGI Symbol;Acc:MGI:1916976]	overlapping	0	0.635285	0.46935	0.402126	0.504007	0.282826	0.456187
Chr1:179050001-179060000	1	179050001	179060000	Smyd3	ENSMUSG00000055067	SET and MYND domain containing 3 [Source:MGI Symbol;Acc:MGI:1916976]	overlapping	0	0.586054	0.521139	0.436097	0.224771	0.275485	0.338114
Chr1:179230001-179240000	1	179230001	179240000	Smyd3	ENSMUSG00000055067	SET and MYND domain containing 3 [Source:MGI Symbol;Acc:MGI:1916976]	overlapping	0	0.611916	0.500404	0.312517	0.405083	0.589775	0.311267
Chr1:179260001-179270000	1	179260001	179270000	Smyd3	ENSMUSG00000055067	SET and MYND domain containing 3 [Source:MGI Symbol;Acc:MGI:1916976]	overlapping	0	0.570569	0.470528	0.455142	0.504007	0.659695	0.254023
Chr1:179610001-179620000	1	179610001	179620000	Cnst	ENSMUSG00000038949	consortin, connexin sorting protein [Source:MGI Symbol;Acc:MGI:2445141]	overlapping	0	0.574301	0.541873	0.311011	0.279236	0.575092	0.440093
Chr1:179640001-179650000	1	179640001	179650000	null			Not found	0	0.586054	0.536171	0.336411	0.458929	0.442244	0.221834
Chr1:179700001-179740000	1	179700001	179740000	Gm1305	ENSMUSG00000087236	predicted gene 1305 [Source:MGI Symbol;Acc:MGI:2686151]	overlapping	0	0.596496	0.48893	0.455978	0.8072	0.589076	0.257164
Chr1:179860001-179870000	1	179860001	179870000	null			Not found	0	0.606109	0.583342	0.433114	0.413233	0.418121	0.465121
Chr1:179940001-179950000	1	179940001	179950000	null			Not found	0	0.596012	0.557895	0.442821	0.224771	0.386658	0.36852
Chr1:180160001-180190000	1	180160001	180190000	Cdc42bpa	ENSMUSG00000026490	CDC42 binding protein kinase alpha [Source:MGI Symbol;Acc:MGI:2441841]	overlapping	0	0.715306	0.538402	0.428385	0.50944	0.606556	0.447844
Chr1:180210001-180240000	1	180210001	180240000	Psen2	ENSMUSG00000010609	presenilin 2 [Source:MGI Symbol;Acc:MGI:109284]	overlapping	0	0.648422	0.46558	0.409214	0.386928	0.405186	0.341092
Chr1:180280001-180310000	1	180280001	180310000	null			Not found	0	0.627449	0.439112	0.468461	0.326824	0.376985	0.470492
Chr1:180330001-180550000	1	180330001	180550000	Gm5069	ENSMUSG00000055676	predicted pseudogene 5069 [Source:MGI Symbol;Acc:MGI:3644516]	overlapping	0	0.646731	0.477714	0.480683	0.435508	0.400403	0.382188
Chr1:180590001-180600000	1	180590001	180600000	Parp1	ENSMUSG00000026496	poly (ADP-ribose) polymerase family, member 1 [Source:MGI Symbol;Acc:MGI:1340806]	overlapping	0	0.576236	0.373925	0.467085	0.684318	0.691159	0.563506
Chr1:180630001-180640000	1	180630001	180640000	Lin9	ENSMUSG00000058729	lin-9 homolog (C. elegans) [Source:MGI Symbol;Acc:MGI:1919818]	downstream	1150	0.596012	0.547669	0.572747	0.593544	0.357641	0.343473
Chr1:180760001-180790000	1	180760001	180790000	null			Not found	0	0.699634	0.473246	0.392413	0.314721	0.431756	0.283245
Chr1:180820001-180830000	1	180820001	180830000	null			Not found	0	0.672622	0.467088	0.531313	0.530311	0.473708	0.248673
Chr1:180870001-180980000	1	180870001	180980000	Lefty2	ENSMUSG00000066652	left-right determination factor 2 [Source:MGI Symbol;Acc:MGI:2443573]	overlapping	0	0.650032	0.474011	0.417229	0.378676	0.445136	0.355517
Chr1:181000001-181020000	1	181000001	181020000	Ephx1	ENSMUSG00000038776	epoxide hydrolase 1, microsomal [Source:MGI Symbol;Acc:MGI:95405]	overlapping	0	0.739622	0.576367	0.549047	0.737855	0.420569	0.380156
Chr1:181060001-181070000	1	181060001	181070000	9130409I23Rik	ENSMUSG00000038768	RIKEN cDNA 9130409I23 gene [Source:MGI Symbol;Acc:MGI:3588271]	overlapping	0	0.578312	0.509641	0.364406	0.584776	0.41078	0.189637
Chr1:181230001-181260000	1	181230001	181260000	A430110L20Rik	ENSMUSG00000054135	RIKEN cDNA A430110L20 gene [Source:MGI Symbol;Acc:MGI:3036249]	upstream	1511	0.567662	0.488969	0.367023	0.344567	0.347969	0.283248
Chr1:181280001-181340000	1	181280001	181340000	null			Not found	0	0.546113	0.452134	0.473001	0.485852	0.513213	0.456483
Chr1:181360001-181460000	1	181360001	181460000	Cnih3	ENSMUSG00000026514	cornichon homolog 3 (Drosophila) [Source:MGI Symbol;Acc:MGI:1920228]	overlapping	0	0.626975	0.474015	0.549308	0.402081	0.560479	0.465659
Chr1:181530001-181540000	1	181530001	181540000	null			Not found	0	0.706366	0.603982	0.650415	0.278617	0.519506	0.40432
Chr1:181800001-181810000	1	181800001	181810000	null			Not found	0	0.71798	0.518877	0.597389	0.827083	0.471261	0.54027
Chr1:181870001-181890000	1	181870001	181890000	null			Not found	0	0.602927	0.434903	0.381031	0.440465	0.378267	0.321119
Chr1:182090001-182160000	1	182090001	182160000	Srp9	ENSMUSG00000026511	signal recognition particle 9 [Source:MGI Symbol;Acc:MGI:1350930]	overlapping	0	0.579241	0.424017	0.393053	0.456335	0.449186	0.343483
Chr1:182360001-182370000	1	182360001	182370000	null			Not found	0	0.641092	0.509641	0.431248	0.449542	0.389105	0.318436
Chr1:182400001-182410000	1	182400001	182410000	Gm10517	ENSMUSG00000073482	predicted gene 10517 [Source:MGI Symbol;Acc:MGI:3642267]	overlapping	0	0.603755	0.421096	0.401378	0.386928	0.352747	0.377445
Chr1:182470001-182530000	1	182470001	182530000	Capn2	ENSMUSG00000026509	calpain 2 [Source:MGI Symbol;Acc:MGI:88264]	overlapping	0	0.65831	0.45387	0.504367	0.362721	0.542171	0.446633
Chr1:182560001-182570000	1	182560001	182570000	Capn8	ENSMUSG00000038599	calpain 8 [Source:MGI Symbol;Acc:MGI:2181366]	overlapping	0	0.731391	0.317518	0.428256	0.567239	0.444691	0.499138
Chr1:182600001-182630000	1	182600001	182630000	Capn8	ENSMUSG00000038599	calpain 8 [Source:MGI Symbol;Acc:MGI:2181366]	overlapping	0	0.607719	0.402655	0.512518	0.359593	0.374538	0.519402
Chr1:182670001-182690000	1	182670001	182690000	null			Not found	0	0.635424	0.460891	0.571824	0.490236	0.373373	0.373901
Chr1:182760001-182810000	1	182760001	182810000	Susd4	ENSMUSG00000038576	sushi domain containing 4 [Source:MGI Symbol;Acc:MGI:2138351]	overlapping	0	0.654701	0.461075	0.492255	0.687083	0.485315	0.514856
Chr1:182850001-182910000	1	182850001	182910000	Susd4	ENSMUSG00000038576	sushi domain containing 4 [Source:MGI Symbol;Acc:MGI:2138351]	overlapping	0	0.596404	0.5043	0.496585	0.864958	0.541355	0.382247
Chr1:182940001-182960000	1	182940001	182960000	Tlr5	ENSMUSG00000079164	toll-like receptor 5 [Source:MGI Symbol;Acc:MGI:1858171]	overlapping	0	0.652017	0.509641	0.513201	0.30554	0.43263	0.350629
Chr1:183040001-183090000	1	183040001	183090000	Disp1	ENSMUSG00000030768	dispatched homolog 1 (Drosophila) [Source:MGI Symbol;Acc:MGI:1916147]	overlapping	0	0.635009	0.480924	0.500762	0.564867	0.390993	0.278718
Chr1:183180001-183190000	1	183180001	183190000	Disp1	ENSMUSG00000030768	dispatched homolog 1 (Drosophila) [Source:MGI Symbol;Acc:MGI:1916147]	overlapping	0	0.584258	0.613218	0.301313	0.197848	0.478602	0.46332
Chr1:183240001-183250000	1	183240001	183250000	null			Not found	0	0.586194	0.518877	0.374501	0.629854	0.423016	0.517024
Chr1:183370001-183450000	1	183370001	183450000	CAAA01083517.2	ENSMUSG00000072258	TATA box-binding protein-associated factor RNA polymerase I subunit A [Source:RefSeq peptide;Acc:NP_067441]	overlapping	0	0.565779	0.450159	0.365205	0.392331	0.428041	0.304349
Chr1:183570001-183580000	1	183570001	183580000	null			Not found	0	0.599884	0.453328	0.505914	1.21339	0.773315	0.483026
Chr1:183680001-183710000	1	183680001	183710000	Gm8214	ENSMUSG00000090533	predicted gene 8214 [Source:MGI Symbol;Acc:MGI:3646554]	overlapping	0	0.55213	0.376611	0.513389	0.419696	0.486527	0.382245
Chr1:183950001-183960000	1	183950001	183960000	null			Not found	0	0.57444	0.398099	0.461118	0.314927	0.275485	0.314851
Chr1:184020001-184030000	1	184020001	184030000	Dusp10	ENSMUSG00000039384	dual specificity phosphatase 10 [Source:MGI Symbol;Acc:MGI:1927070]	overlapping	0	0.674418	0.475146	0.65265	0.269849	0.253809	0.325578
Chr1:184170001-184180000	1	184170001	184180000	null			Not found	0	0.627681	0.457946	0.57163	0.477084	0.386658	0.361369
Chr1:184230001-184240000	1	184230001	184240000	null			Not found	0	0.652985	0.355547	0.517118	0.395696	0.29716	0.363161
Chr1:184270001-184280000	1	184270001	184280000	null			Not found	0	0.592141	0.454506	0.523093	0.656777	0.439797	0.429357
Chr1:184300001-184310000	1	184300001	184310000	null			Not found	0	0.694472	0.557989	0.649297	0.360005	0.466366	0.427538
Chr1:184350001-184360000	1	184350001	184360000	null			Not found	0	0.572504	0.394565	0.523472	0.224771	0.248915	0.44365
Chr1:184460001-184470000	1	184460001	184470000	null			Not found	0	0.594216	0.437212	0.346866	0.251694	0.135295	0.169958
Chr1:184570001-184590000	1	184570001	184590000	U6	ENSMUSG00000089057	U6 spliceosomal RNA [Source:RFAM;Acc:RF00026]	overlapping	0	0.622563	0.429107	0.521038	0.580392	0.511115	0.291601
Chr1:184610001-184620000	1	184610001	184620000	null			Not found	0	0.576236	0.473968	0.564167	0.395696	0.273038	0.42398
Chr1:184700001-184730000	1	184700001	184730000	4930488B22Rik	ENSMUSG00000092578	RIKEN cDNA 4930488B22 gene [Source:MGI Symbol;Acc:MGI:1922221]	overlapping	0	0.555356	0.375826	0.466839	0.338721	0.327109	0.282062
Chr1:184770001-184800000	1	184770001	184800000	Mosc1	ENSMUSG00000026621	MOCO sulphurase C-terminal domain containing 1 [Source:MGI Symbol;Acc:MGI:1913362]	overlapping	0	0.59085	0.465187	0.459373	0.318056	0.432572	0.331549
Chr1:184860001-184900000	1	184860001	184900000	C130074G19Rik	ENSMUSG00000039349	RIKEN cDNA C130074G19 gene [Source:MGI Symbol;Acc:MGI:2444831]	overlapping	0	0.671758	0.454188	0.454309	0.382389	0.448275	0.34303
Chr1:184960001-184970000	1	184960001	184970000	Mark1	ENSMUSG00000026620	MAP/microtubule affinity-regulating kinase 1 [Source:MGI Symbol;Acc:MGI:2664902]	overlapping	0	0.619799	0.552193	0.464471	0.360005	0.367429	0.483017
Chr1:185020001-185030000	1	185020001	185030000	null			Not found	0	0.588269	0.460114	0.583572	0.34185	0.529294	0.579609
Chr1:185060001-185070000	1	185060001	185070000	null			Not found	0	0.578312	0.392303	0.49472	0.34185	0.360088	0.504497
Chr1:185140001-185150000	1	185140001	185150000	null			Not found	0	0.635424	0.427976	0.62242	0.332463	0.367429	0.495544
Chr1:185470001-185480000	1	185470001	185480000	Slc30a10	ENSMUSG00000026614	solute carrier family 30, member 10 [Source:MGI Symbol;Acc:MGI:2685058]	upstream	1239	0.588269	0.583248	0.45215	0.197848	0.618792	0.159222
Chr1:185570001-185610000	1	185570001	185610000	null			Not found	0	0.584258	0.490402	0.544284	0.447505	0.432018	0.381498
Chr1:185640001-185680000	1	185640001	185680000	null			Not found	0	0.565555	0.409868	0.480997	0.258734	0.455529	0.297863
Chr1:185730001-185740000	1	185730001	185740000	null			Not found	0	0.613713	0.408419	0.539155	0.251694	0.442244	0.261192
Chr1:185770001-185790000	1	185770001	185790000	null			Not found	0	0.607007	0.413037	0.583397	0.404464	0.309396	0.346157
Chr1:185820001-185830000	1	185820001	185830000	null			Not found	0	0.773018	0.582069	0.645935	0.755082	0.364982	0.295181
Chr1:186160001-186170000	1	186160001	186170000	null			Not found	0	0.589926	0.431416	0.617922	0.242926	0.22724	0.384623
Chr1:186340001-186350000	1	186340001	186350000	null			Not found	0	0.609841	0.528019	0.44356	0.34185	0.391552	0.338096
Chr1:186410001-186420000	1	186410001	186420000	null			Not found	0	0.578172	0.524673	0.602257	0.314927	0.587328	0.445433
Chr1:186440001-186470000	1	186440001	186470000	null			Not found	0	0.527053	0.523432	0.531806	0.278823	0.285157	0.396553
Chr1:186650001-186700000	1	186650001	186700000	Tgfb2	ENSMUSG00000039239	transforming growth factor, beta 2 [Source:MGI Symbol;Acc:MGI:98726]	overlapping	0	0.622397	0.456042	0.515329	0.401204	0.459165	0.368882
Chr1:186840001-186850000	1	186840001	186850000	null			Not found	0	0.623391	0.487728	0.552215	0.125847	0.391552	0.311285
Chr1:186960001-186970000	1	186960001	186970000	D1Pas1	ENSMUSG00000039224	DNA segment, Chr 1, Pasteur Institute 1 [Source:MGI Symbol;Acc:MGI:91842]	overlapping	0	0.590065	0.347489	0.493981	0.611699	0.386658	0.400717
Chr1:187000001-187020000	1	187000001	187020000	null			Not found	0	0.603825	0.463106	0.540647	0.517468	0.390328	0.271914
Chr1:187300001-187310000	1	187300001	187310000	Gpatch2	ENSMUSG00000039210	G patch domain containing 2 [Source:MGI Symbol;Acc:MGI:1915019]	overlapping	0	0.568493	0.464826	0.331183	0.368773	0.449585	0.549213
Chr1:187340001-187350000	1	187340001	187350000	Gpatch2	ENSMUSG00000039210	G patch domain containing 2 [Source:MGI Symbol;Acc:MGI:1915019]	overlapping	0	0.586054	0.633952	0.359935	0.621086	0.609003	0.354218
Chr1:187630001-187640000	1	187630001	187640000	Esrrg	ENSMUSG00000026610	estrogen-related receptor gamma [Source:MGI Symbol;Acc:MGI:1347056]	overlapping	0	0.60597	0.388863	0.480154	0.548466	0.587328	0.372104
Chr1:187880001-187910000	1	187880001	187910000	Esrrg	ENSMUSG00000026610	estrogen-related receptor gamma [Source:MGI Symbol;Acc:MGI:1347056]	overlapping	0	0.549502	0.397314	0.412453	0.305953	0.334334	0.333947
Chr1:188560001-188570000	1	188560001	188570000	Ush2a	ENSMUSG00000026609	Usher syndrome 2A (autosomal recessive, mild) homolog (human) [Source:MGI Symbol;Acc:MGI:1341292]	overlapping	0	0.570429	0.502761	0.607097	0.476465	0.331071	0.345265
Chr1:188910001-188940000	1	188910001	188940000	Ush2a	ENSMUSG00000026609	Usher syndrome 2A (autosomal recessive, mild) homolog (human) [Source:MGI Symbol;Acc:MGI:1341292]	overlapping	0	0.453071	0.419949	0.398392	0.503594	0.32944	0.401327
Chr1:188980001-189000000	1	188980001	189000000	Kctd3	ENSMUSG00000026608	potassium channel tetramerisation domain containing 3 [Source:MGI Symbol;Acc:MGI:2444629]	overlapping	0	0.59705	0.418786	0.342756	0.422619	0.701997	0.472295
Chr1:189070001-189080000	1	189070001	189080000	null			Not found	0	0.607766	0.469444	0.550349	0.395696	0.38421	0.517015
Chr1:189210001-189220000	1	189210001	189220000	Kcnk2	ENSMUSG00000037624	potassium channel, subfamily K, member 2 [Source:MGI Symbol;Acc:MGI:109366]	overlapping	0	0.617584	0.389947	0.431248	0.233539	0.338413	0.506271
Chr1:189330001-189340000	1	189330001	189340000	Kcnk2	ENSMUSG00000037624	potassium channel, subfamily K, member 2 [Source:MGI Symbol;Acc:MGI:109366]	overlapping	0	0.627263	0.347489	0.697085	0.530311	0.526847	0.547421
Chr1:189480001-189500000	1	189480001	189500000	null			Not found	0	0.601819	0.472884	0.549606	0.598547	0.338413	0.398038
Chr1:189560001-189580000	1	189560001	189580000	null			Not found	0	0.642269	0.548164	0.459807	0.642697	0.610227	0.415933
Chr1:189600001-189610000	1	189600001	189610000	null			Not found	0	0.633767	0.499321	0.404362	0.296772	0.38421	0.275494
Chr1:189710001-189720000	1	189710001	189720000	null			Not found	0	0.611777	0.401539	0.396142	0.314927	0.306949	0.325587
Chr1:189740001-189750000	1	189740001	189750000	Ptpn14	ENSMUSG00000026604	protein tyrosine phosphatase, non-receptor type 14 [Source:MGI Symbol;Acc:MGI:102467]	overlapping	0	0.608184	0.599364	0.44767	0.15277	0.439797	0.441858
Chr1:189770001-189920000	1	189770001	189920000	Ptpn14	ENSMUSG00000026604	protein tyrosine phosphatase, non-receptor type 14 [Source:MGI Symbol;Acc:MGI:102467]	overlapping	0	0.616931	0.456055	0.449714	0.363973	0.457067	0.418496
Chr1:189970001-189980000	1	189970001	189980000	null			Not found	0	0.607766	0.456674	0.602617	0.422619	0.362535	0.506289
Chr1:190000001-190010000	1	190000001	190010000	null			Not found	0	0.647317	0.342871	0.495089	0.656158	0.38421	0.427547
Chr1:190060001-190090000	1	190060001	190090000	null			Not found	0	0.596564	0.432562	0.534297	0.34185	0.275485	0.474674
Chr1:190170001-190180000	1	190170001	190180000	Prox1	ENSMUSG00000010175	prospero-related homeobox 1 [Source:MGI Symbol;Acc:MGI:97772]	overlapping	0	0.568493	0.369307	0.295337	0.954167	0.500278	0.359585
Chr1:190250001-190260000	1	190250001	190260000	null			Not found	0	0.586333	0.347489	0.593289	0.170925	0.584881	0.495544
Chr1:190370001-190380000	1	190370001	190380000	null			Not found	0	0.656857	0.466004	0.56715	0.431387	0.490489	0.499093
Chr1:190400001-190430000	1	190400001	190430000	null			Not found	0	0.602604	0.501975	0.570888	0.509646	0.348784	0.382828
Chr1:190450001-190530000	1	190450001	190530000	AC124613.1	ENSMUSG00000093064	No description	overlapping	0	0.608786	0.455454	0.526829	0.374253	0.417466	0.400724
Chr1:190560001-190570000	1	190560001	190570000	null			Not found	0	0.661007	0.526935	0.543256	0.745696	0.502725	0.422197
Chr1:190590001-190610000	1	190590001	190610000	null			Not found	0	0.652985	0.495833	0.523292	0.350927	0.545026	0.528647
Chr1:190660001-190780000	1	190660001	190780000	Rps6kc1	ENSMUSG00000089872	ribosomal protein S6 kinase polypeptide 1 [Source:MGI Symbol;Acc:MGI:2443419]	overlapping	0	0.623024	0.469593	0.499228	0.413223	0.427153	0.371804
Chr1:190800001-190810000	1	190800001	190810000	Rps6kc1	ENSMUSG00000089872	ribosomal protein S6 kinase polypeptide 1 [Source:MGI Symbol;Acc:MGI:2443419]	overlapping	0	0.592141	0.414216	0.462975	0.450161	0.572645	0.486601
Chr1:190890001-190920000	1	190890001	190920000	Rps6kc1	ENSMUSG00000089872	ribosomal protein S6 kinase polypeptide 1 [Source:MGI Symbol;Acc:MGI:2443419]	overlapping	0	0.567848	0.407241	0.44518	0.305953	0.362535	0.253443
Chr1:190950001-191000000	1	190950001	191000000	Vash2	ENSMUSG00000037568	vasohibin 2 [Source:MGI Symbol;Acc:MGI:2444826]	overlapping	0	0.613298	0.495626	0.462011	0.453421	0.40218	0.291246
Chr1:191040001-191050000	1	191040001	191050000	1700022P22Rik	ENSMUSG00000057072	RIKEN cDNA 1700022P22 gene [Source:MGI Symbol;Acc:MGI:1922808]	overlapping	0	0.580247	0.45215	0.493981	0.666163	0.558311	0.491969
Chr1:191090001-191200000	1	191090001	191200000	Batf3	ENSMUSG00000026630	basic leucine zipper transcription factor, ATF-like 3 [Source:MGI Symbol;Acc:MGI:1925491]	overlapping	0	0.579569	0.474002	0.461657	0.63805	0.534284	0.282494
Chr1:191230001-191360000	1	191230001	191360000	Nenf	ENSMUSG00000037499	neuron derived neurotrophic factor [Source:MGI Symbol;Acc:MGI:1913458]	overlapping	0	0.667049	0.494202	0.436731	0.455366	0.470481	0.319401
Chr1:191420001-191440000	1	191420001	191440000	null			Not found	0	0.629617	0.454459	0.364969	0.319311	0.471261	0.305025
Chr1:191490001-191520000	1	191490001	191520000	null			Not found	0	0.575039	0.388502	0.366155	0.362721	0.414043	0.208712
Chr1:191620001-191640000	1	191620001	191640000	Ints7	ENSMUSG00000037461	integrator complex subunit 7 [Source:MGI Symbol;Acc:MGI:1924315]	overlapping	0	0.603894	0.51195	0.516185	0.661161	0.517233	0.309483
Chr1:191700001-191710000	1	191700001	191710000	null			Not found	0	0.582044	0.44871	0.433114	0.261081	0.333518	0.279078
Chr1:191790001-191800000	1	191790001	191800000	null			Not found	0	0.688247	0.572927	0.459253	1.17894	0.911058	0.388207
Chr1:191830001-191850000	1	191830001	191850000	Nek2	ENSMUSG00000026622	NIMA (never in mitosis gene a)-related expressed kinase 2 [Source:MGI Symbol;Acc:MGI:109359]	overlapping	0	0.651049	0.479811	0.315689	0.391621	0.448362	0.329176
Chr1:191890001-191930000	1	191890001	191930000	1700034H15Rik	ENSMUSG00000055833	RIKEN cDNA 1700034H15 gene [Source:MGI Symbol;Acc:MGI:1921515]	overlapping	0	0.58094	0.546173	0.450192	0.50166	0.490576	0.380154
Chr1:191950001-192000000	1	191950001	192000000	Rd3	ENSMUSG00000049353	retinal degeneration 3 [Source:MGI Symbol;Acc:MGI:1921273]	overlapping	0	0.620102	0.513806	0.45357	0.322065	0.428749	0.272995
Chr1:192060001-192090000	1	192060001	192090000	Traf5	ENSMUSG00000026637	TNF receptor-associated factor 5 [Source:MGI Symbol;Acc:MGI:107548]	overlapping	0	0.616939	0.531129	0.450041	0.377953	0.406002	0.424575
Chr1:192400001-192410000	1	192400001	192410000	Kcnh1	ENSMUSG00000058248	potassium voltage-gated channel, subfamily H (eag-related), member 1 [Source:MGI Symbol;Acc:MGI:1341721]	overlapping	0	0.727659	0.580986	0.333049	0.467697	0.415674	0.53311
Chr1:192440001-192450000	1	192440001	192450000	Kcnh1	ENSMUSG00000058248	potassium voltage-gated channel, subfamily H (eag-related), member 1 [Source:MGI Symbol;Acc:MGI:1341721]	overlapping	0	0.710237	0.62236	0.312138	0.179693	0.476155	0.472281
Chr1:192480001-192500000	1	192480001	192500000	Kcnh1	ENSMUSG00000058248	potassium voltage-gated channel, subfamily H (eag-related), member 1 [Source:MGI Symbol;Acc:MGI:1341721]	overlapping	0	0.658034	0.533768	0.307478	0.405083	0.358864	0.447239
Chr1:192520001-192530000	1	192520001	192530000	Hhat	ENSMUSG00000037375	hedgehog acyltransferase [Source:MGI Symbol;Acc:MGI:2444681]	overlapping	0	0.700001	0.475146	0.319231	0.477084	0.519506	0.434725
Chr1:192550001-192560000	1	192550001	192560000	Hhat	ENSMUSG00000037375	hedgehog acyltransferase [Source:MGI Symbol;Acc:MGI:2444681]	overlapping	0	0.584119	0.521139	0.435349	0.45831	0.502725	0.488384
Chr1:192580001-192590000	1	192580001	192590000	Hhat	ENSMUSG00000037375	hedgehog acyltransferase [Source:MGI Symbol;Acc:MGI:2444681]	overlapping	0	0.596012	0.514259	0.527573	0.664927	0.444691	0.386424
Chr1:192650001-192770000	1	192650001	192770000	Hhat	ENSMUSG00000037375	hedgehog acyltransferase [Source:MGI Symbol;Acc:MGI:2444681]	overlapping	0	0.573437	0.480797	0.409399	0.433158	0.449498	0.32902
Chr1:192790001-192870000	1	192790001	192870000	A730013G03Rik	ENSMUSG00000047384	RIKEN cDNA A730013G03 gene [Source:MGI Symbol;Acc:MGI:2445118]	overlapping	0	0.653763	0.513864	0.503822	0.479985	0.474888	0.4099
Chr1:192960001-192970000	1	192960001	192970000	Syt14	ENSMUSG00000016200	synaptotagmin XIV [Source:MGI Symbol;Acc:MGI:2444490]	overlapping	0	0.590065	0.487822	0.460749	1.0074	0.548522	0.463347
Chr1:193060001-193070000	1	193060001	193070000	null			Not found	0	0.729734	0.661567	0.595154	0.206616	0.517059	0.211099
Chr1:193090001-193220000	1	193090001	193220000	Diexf	ENSMUSG00000016181	digestive organ expansion factor homolog (zebrafish) [Source:MGI Symbol;Acc:MGI:2138080]	overlapping	0	0.657305	0.513653	0.519733	0.366075	0.413604	0.404579
Chr1:193240001-193550000	1	193240001	193550000	1600010F14Rik	ENSMUSG00000089688	RIKEN cDNA 1600010F14 gene [Source:MGI Symbol;Acc:MGI:1917033]	overlapping	0	0.643377	0.505614	0.535332	0.423384	0.427583	0.361141
Chr1:193580001-193590000	1	193580001	193590000	null			Not found	0	0.688386	0.549837	0.60561	0.233539	0.275485	0.388189
Chr1:193660001-193740000	1	193660001	193740000	null			Not found	0	0.588182	0.459902	0.557212	0.396947	0.374596	0.298307
Chr1:193940001-193950000	1	193940001	193950000	null			Not found	0	0.600023	0.513081	0.418179	0.269849	0.294713	0.316643
Chr1:194020001-194030000	1	194020001	194030000	null			Not found	0	0.576236	0.479764	0.567159	0.405083	0.408333	0.388207
Chr1:194100001-194110000	1	194100001	194110000	null			Not found	0	0.607627	0.506201	0.487257	0.432006	0.326177	0.466913
Chr1:194330001-194340000	1	194330001	194340000	null			Not found	0	0.653264	0.560251	0.576867	0.513393	0.248915	0.302341
Chr1:194460001-194470000	1	194460001	194470000	null			Not found	0	0.603894	0.600542	0.603753	0.629235	0.333518	0.413236
Chr1:194620001-194640000	1	194620001	194640000	Plxna2	ENSMUSG00000026640	plexin A2 [Source:MGI Symbol;Acc:MGI:107684]	overlapping	0	0.694403	0.578677	0.510772	0.43639	0.457976	0.313068
Chr1:194680001-194740000	1	194680001	194740000	Plxna2	ENSMUSG00000026640	plexin A2 [Source:MGI Symbol;Acc:MGI:107684]	overlapping	0	0.611385	0.48571	0.544196	0.428774	0.358457	0.358089
Chr1:194790001-194820000	1	194790001	194820000	Plxna2	ENSMUSG00000026640	plexin A2 [Source:MGI Symbol;Acc:MGI:107684]	overlapping	0	0.687741	0.554518	0.630624	0.4318	0.381064	0.421597
Chr1:194930001-194940000	1	194930001	194940000	Cd34	ENSMUSG00000016494	CD34 antigen [Source:MGI Symbol;Acc:MGI:88329]	overlapping	0	0.574301	0.570571	0.506662	0.386309	0.502725	0.552779
Chr1:195000001-195010000	1	195000001	195010000	null			Not found	0	0.598227	0.555727	0.504796	0.648009	0.579986	0.475866
Chr2:4460001-4470000	2	4460001	4470000	Frmd4a	ENSMUSG00000026657	FERM domain containing 4A [Source:MGI Symbol;Acc:MGI:1919850]	overlapping	0	0.609841	0.369307	0.520101	0.242926	0.444691	0.361369
Chr2:4540001-4550000	2	4540001	4550000	Frmd4a	ENSMUSG00000026657	FERM domain containing 4A [Source:MGI Symbol;Acc:MGI:1919850]	overlapping	0	0.629478	0.449888	0.489861	0.242926	0.447138	0.189628
Chr2:5710001-5720000	2	5710001	5720000	Camk1d	ENSMUSG00000039145	calcium/calmodulin-dependent protein kinase ID [Source:MGI Symbol;Acc:MGI:2442190]	overlapping	0	0.578172	0.439474	0.222528	0.377541	0.420569	0.177109
Chr2:6100001-6110000	2	6100001	6110000	5430407P10Rik	ENSMUSG00000045319	RIKEN cDNA 5430407P10 gene [Source:MGI Symbol;Acc:MGI:2442238]	overlapping	0	0.597948	0.510819	0.396142	0.386928	0.780657	0.472281
Chr2:6270001-6280000	2	6270001	6280000	A230108P19Rik	ENSMUSG00000087125	RIKEN cDNA A230108P19 gene [Source:MGI Symbol;Acc:MGI:2443444]	overlapping	0	0.686451	0.411954	0.502931	0.521543	0.413227	0.364953
Chr2:6450001-6460000	2	6450001	6460000	null			Not found	0	0.688526	0.576462	0.615317	0.377541	0.304502	0.339898
Chr2:9820001-9850000	2	9820001	9850000	null			Not found	0	0.582137	0.387716	0.484138	0.314721	0.394698	0.245686
Chr2:9870001-9890000	2	9870001	9890000	Gata3	ENSMUSG00000015619	GATA binding protein 3 [Source:MGI Symbol;Acc:MGI:95663]	overlapping	0	0.640263	0.357856	0.335289	0.274542	0.363759	0.231664
Chr2:10210001-10240000	2	10210001	10240000	Itih5	ENSMUSG00000025780	inter-alpha (globulin) inhibitor H5 [Source:MGI Symbol;Acc:MGI:1925751]	overlapping	0	0.64773	0.368553	0.543385	0.641751	0.735558	0.491375
Chr2:10870001-10880000	2	10870001	10880000	null			Not found	0	0.615509	0.320958	0.527203	0.306159	0.444691	0.459753
Chr2:11170001-11180000	2	11170001	11180000	Prkcq	ENSMUSG00000026778	protein kinase C, theta [Source:MGI Symbol;Acc:MGI:97601]	overlapping	0	0.62381	0.364783	0.490979	0.405083	0.270591	0.432924
Chr2:11380001-11390000	2	11380001	11390000	Gm13291	ENSMUSG00000086491	predicted gene 13291 [Source:MGI Symbol;Acc:MGI:3649284]	overlapping	0	0.598227	0.630418	0.566411	0.413851	0.393999	0.377472
Chr2:11430001-11440000	2	11430001	11440000	null			Not found	0	0.576376	0.406157	0.548484	0.278617	0.618792	0.271918
Chr2:11470001-11500000	2	11470001	11500000	Pfkfb3	ENSMUSG00000026773ption=6-phosphofructo-2-kinase/fructose-2,6-biphosphatase3 [Source:MGI Symbol;Acc:MGI:2181202]	No description	overlapping	0	0.618276	0.434164	0.480407	0.452877	0.480117	0.414449
Chr2:11520001-11560000	2	11520001	11560000	null			Not found	0	0.589097	0.482933	0.477261	0.283465	0.40003	0.316648
Chr2:11660001-11670000	2	11660001	11670000	Il2ra	ENSMUSG00000026770	interleukin 2 receptor, alpha chain [Source:MGI Symbol;Acc:MGI:96549]	overlapping	0	0.598087	0.401539	0.442812	0.395696	0.29716	0.207523
Chr2:11710001-11720000	2	11710001	11720000	Il15ra	ENSMUSG00000023206	interleukin 15 receptor, alpha chain [Source:MGI Symbol;Acc:MGI:104644]	overlapping	0	0.672761	0.568309	0.544004	0.269849	0.485595	0.282654
Chr2:11750001-11760000	2	11750001	11760000	Fbxo18	ENSMUSG00000058594	F-box protein 18 [Source:MGI Symbol;Acc:MGI:1354699]	overlapping	0	0.584258	0.406157	0.526455	0.629854	0.41078	0.28087
Chr2:11970001-11980000	2	11970001	11980000	null			Not found	0	0.672622	0.377365	0.530565	0.566621	0.302054	0.31305
Chr2:12010001-12020000	2	12010001	12020000	null			Not found	0	0.598087	0.501677	0.526446	1.0437	0.669484	0.402509
Chr2:12320001-12330000	2	12320001	12330000	null			Not found	0	0.647178	0.460302	0.52458	0.666163	0.372324	0.293389
Chr2:13570001-13580000	2	13570001	13580000	Vim	ENSMUSG00000026728	vimentin [Source:MGI Symbol;Acc:MGI:98932]	overlapping	0	0.627402	0.507379	0.37935	0.368773	0.367429	0.357784
Chr2:17290001-17300000	2	17290001	17300000	null			Not found	0	0.592001	0.534993	0.533918	0.701855	0.804779	0.352434
Chr2:17830001-17840000	2	17830001	17840000	null			Not found	0	0.652846	0.396921	0.491367	0.485233	0.447138	0.474073
Chr2:17860001-17870000	2	17860001	17870000	null			Not found	0	0.592141	0.457852	0.542877	0.413851	0.355194	0.227193
Chr2:18210001-18220000	2	18210001	18220000	Mllt10	ENSMUSG00000026743	myeloid/lymphoid or mixed-lineage leukemia (trithorax homolog, Drosophila); translocated to, 10 [Source:MGI Symbol;Acc:MGI:1329038]	overlapping	0	0.639296	0.346311	0.523832	0.926626	0.61145	0.359576
Chr2:18630001-18640000	2	18630001	18640000	null			Not found	0	0.666814	0.449794	0.558939	0.314927	0.505172	0.336322
Chr2:18860001-18870000	2	18860001	18870000	Pip4k2a	ENSMUSG00000026737	phosphatidylinositol-5-phosphate 4-kinase, type II, alpha [Source:MGI Symbol;Acc:MGI:1298206]	overlapping	0	0.661147	0.537255	0.558191	0.53093	0.420569	0.330963
Chr2:18890001-18900000	2	18890001	18900000	Pip4k2a	ENSMUSG00000026737	phosphatidylinositol-5-phosphate 4-kinase, type II, alpha [Source:MGI Symbol;Acc:MGI:1298206]	overlapping	0	0.639156	0.470528	0.55409	0.927863	0.691159	0.313077
Chr2:18960001-18980000	2	18960001	18980000	Pip4k2a	ENSMUSG00000026737	phosphatidylinositol-5-phosphate 4-kinase, type II, alpha [Source:MGI Symbol;Acc:MGI:1298206]	overlapping	0	0.55667	0.389452	0.389427	0.481159	0.373373	0.455282
Chr2:19050001-19060000	2	19050001	19060000	null			Not found	0	0.574301	0.519961	0.482768	0.314308	0.299607	0.415028
Chr2:19300001-19330000	2	19300001	19330000	Armc3	ENSMUSG00000037683	armadillo repeat containing 3 [Source:MGI Symbol;Acc:MGI:1918132]	overlapping	0	0.630768	0.464402	0.553333	0.383593	0.426162	0.317238
Chr2:19400001-19460000	2	19400001	19460000	Gm13344	ENSMUSG00000087103	predicted gene 13344 [Source:MGI Symbol;Acc:MGI:3649239]	overlapping	0	0.575614	0.463844	0.469516	0.391415	0.360496	0.324104
Chr2:19670001-19700000	2	19670001	19700000	Gm13346	ENSMUSG00000087246	predicted gene 13346 [Source:MGI Symbol;Acc:MGI:3649698]	overlapping	0	0.537702	0.449103	0.442821	0.467697	0.455995	0.310084
Chr2:19900001-19910000	2	19900001	19910000	Etl4	ENSMUSG00000036617	enhancer trap locus 4 [Source:MGI Symbol;Acc:MGI:95454]	overlapping	0	0.647178	0.436034	0.58844	0.314927	0.473708	0.398934
Chr2:20390001-20400000	2	20390001	20400000	Etl4	ENSMUSG00000036617	enhancer trap locus 4 [Source:MGI Symbol;Acc:MGI:95454]	overlapping	0	0.627542	0.341692	0.537659	0.332463	0.439797	0.334539
Chr2:20470001-20480000	2	20470001	20480000	Etl4	ENSMUSG00000036617	enhancer trap locus 4 [Source:MGI Symbol;Acc:MGI:95454]	overlapping	0	0.721852	0.494702	0.513386	0.773237	0.495383	0.364953
Chr2:20500001-20510000	2	20500001	20510000	Etl4	ENSMUSG00000036617	enhancer trap locus 4 [Source:MGI Symbol;Acc:MGI:95454]	overlapping	0	0.596012	0.408419	0.576488	0.719391	0.471261	0.273719
Chr2:20640001-20660000	2	20640001	20660000	Etl4	ENSMUSG00000036617	enhancer trap locus 4 [Source:MGI Symbol;Acc:MGI:95454]	overlapping	0	0.585296	0.531506	0.512832	0.333082	0.373373	0.316648
Chr2:20760001-20770000	2	20760001	20770000	Etl4	ENSMUSG00000036617	enhancer trap locus 4 [Source:MGI Symbol;Acc:MGI:95454]	overlapping	0	0.633349	0.630418	0.485382	0.504007	0.275485	0.26655
Chr2:20810001-20820000	2	20810001	20820000	Etl4	ENSMUSG00000036617	enhancer trap locus 4 [Source:MGI Symbol;Acc:MGI:95454]	overlapping	0	0.576376	0.613218	0.517496	0.350618	0.405886	0.264776
Chr2:20860001-20870000	2	20860001	20870000	Arhgap21	ENSMUSG00000036591	Rho GTPase activating protein 21 [Source:MGI Symbol;Acc:MGI:1918685]	overlapping	0	0.572504	0.360071	0.494341	0.503388	0.860366	0.466913
Chr2:21010001-21020000	2	21010001	21020000	null			Not found	0	0.601819	0.442914	0.37076	0.206616	0.352747	0.246881
Chr2:21040001-21050000	2	21040001	21050000	null			Not found	0	0.666954	0.487822	0.556695	0.477084	0.41078	0.277286
Chr2:21940001-21950000	2	21940001	21950000	null			Not found	0	0.568493	0.496964	0.470068	0.576008	0.553417	0.354209
Chr2:22170001-22180000	2	22170001	22180000	null			Not found	0	0.615788	0.395743	0.552215	1.12447	0.488391	0.425773
Chr2:22860001-22870000	2	22860001	22870000	Apbb1ip	ENSMUSG00000026786	amyloid beta (A4) precursor protein-binding, family B, member 1 interacting protein [Source:MGI Symbol;Acc:MGI:1861354]	overlapping	0	0.663082	0.478586	0.372626	0.261081	0.367429	0.350642
Chr2:24380001-24450000	2	24380001	24450000	Psd4	ENSMUSG00000026979	pleckstrin and Sec7 domain containing 4 [Source:MGI Symbol;Acc:MGI:2674093]	overlapping	0	0.607489	0.464772	0.527899	0.460181	0.536486	0.501927
Chr2:24500001-24510000	2	24500001	24510000	null			Not found	0	0.670825	0.45559	0.689622	0.216003	0.331071	0.584977
Chr2:24560001-24570000	2	24560001	24570000	Gm13417	ENSMUSG00000085330	predicted gene 13417 [Source:MGI Symbol;Acc:MGI:3652159]	overlapping	0	0.631274	0.491262	0.521976	0.432624	0.415674	0.146704
Chr2:24600001-24630000	2	24600001	24630000	7SK	ENSMUSG00000088571	7SK RNA [Source:RFAM;Acc:RF00100]	overlapping	0	0.687235	0.442584	0.600754	0.452671	0.451101	0.369711
Chr2:24650001-24660000	2	24650001	24660000	Cacna1b	ENSMUSG00000004113	calcium channel, voltage-dependent, N type, alpha 1B subunit [Source:MGI Symbol;Acc:MGI:88296]	overlapping	0	0.705948	0.49244	0.687009	0.288004	0.418121	0.626136
Chr2:24680001-24730000	2	24680001	24730000	Cacna1b	ENSMUSG00000004113	calcium channel, voltage-dependent, N type, alpha 1B subunit [Source:MGI Symbol;Acc:MGI:88296]	overlapping	0	0.565755	0.516106	0.525711	0.523792	0.460633	0.350995
Chr2:24750001-24770000	2	24750001	24770000	Cacna1b	ENSMUSG00000004113	calcium channel, voltage-dependent, N type, alpha 1B subunit [Source:MGI Symbol;Acc:MGI:88296]	overlapping	0	0.716943	0.549931	0.615696	0.526236	0.356417	0.425777
Chr2:24930001-24940000	2	24930001	24940000	Arrdc1	ENSMUSG00000026972	arrestin domain containing 1 [Source:MGI Symbol;Acc:MGI:2446136]	overlapping	0	0.590205	0.456674	0.373374	0.485852	0.41078	0.286238
Chr2:24960001-24980000	2	24960001	24980000	Zmynd19	ENSMUSG00000026974	zinc finger, MYND domain containing 19 [Source:MGI Symbol;Acc:MGI:1914437]	overlapping	0	0.577344	0.394023	0.437778	0.166541	0.470037	0.273719
Chr2:25010001-25020000	2	25010001	25020000	Pnpla7	ENSMUSG00000036833	patatin-like phospholipase domain containing 7 [Source:MGI Symbol;Acc:MGI:2385325]	overlapping	0	0.670825	0.513081	0.53728	0.602312	0.633126	0.266568
Chr2:25050001-25320000	2	25050001	25320000	Pnpla7	ENSMUSG00000036833	patatin-like phospholipase domain containing 7 [Source:MGI Symbol;Acc:MGI:2385325]	overlapping	0	0.657734	0.494418	0.452127	0.384819	0.42365	0.326584
Chr2:25340001-25410000	2	25340001	25410000	Man1b1	ENSMUSG00000036646	mannosidase, alpha, class 1B, member 1 [Source:MGI Symbol;Acc:MGI:2684954]	overlapping	0	0.606976	0.448851	0.40911	0.290509	0.348002	0.317157
Chr2:25430001-25520000	2	25430001	25520000	Abca2	ENSMUSG00000026944	ATP-binding cassette, sub-family A (ABC1), member 2 [Source:MGI Symbol;Acc:MGI:99606]	overlapping	0	0.729151	0.503677	0.548815	0.47674	0.513174	0.315253
Chr2:25550001-25590000	2	25550001	25590000	Edf1	ENSMUSG00000015092	endothelial differentiation-related factor 1 [Source:MGI Symbol;Acc:MGI:1891227]	overlapping	0	0.706675	0.439497	0.365533	0.512775	0.484546	0.335435
Chr2:25610001-25710000	2	25610001	25710000	Gm13520	ENSMUSG00000052403	predicted gene 13520 [Source:MGI Symbol;Acc:MGI:3701343]	overlapping	0	0.594021	0.476423	0.51675	0.487667	0.385679	0.374067
Chr2:25760001-25790000	2	25760001	25790000	Lcn3	ENSMUSG00000026936	lipocalin 3 [Source:MGI Symbol;Acc:MGI:102669]	overlapping	0	0.623531	0.561461	0.624532	0.713133	0.662958	0.45737
Chr2:25820001-25930000	2	25820001	25930000	Lcn9	ENSMUSG00000023210	lipocalin 9 [Source:MGI Symbol;Acc:MGI:1924954]	overlapping	0	0.731407	0.514679	0.52958	0.434172	0.44288	0.369825
Chr2:26020001-26090000	2	26020001	26090000	Ubac1	ENSMUSG00000036352	ubiquitin associated domain containing 1 [Source:MGI Symbol;Acc:MGI:1920995]	overlapping	0	0.630307	0.523313	0.468264	0.331652	0.452582	0.349365
Chr2:26110001-26200000	2	26110001	26200000	Nacc2	ENSMUSG00000026932	nucleus accumbens associated 2, BEN and BTB (POZ) domain containing [Source:MGI Symbol;Acc:MGI:1915241]	overlapping	0	0.648407	0.488194	0.452113	0.361885	0.338879	0.316254
Chr2:26220001-26260000	2	26220001	26260000	Qsox2	ENSMUSG00000036327	quiescin Q6 sulfhydryl oxidase 2 [Source:MGI Symbol;Acc:MGI:2387194]	overlapping	0	0.620074	0.504775	0.493131	0.355157	0.512951	0.406094
Chr2:26280001-26370000	2	26280001	26370000	4932418E24Rik	ENSMUSG00000048038	RIKEN cDNA 4932418E24 gene [Source:MGI Symbol;Acc:MGI:3045295]	overlapping	0	0.729581	0.498818	0.472232	0.516603	0.477165	0.360175
Chr2:26390001-26610000	2	26390001	26610000	Pmpca	ENSMUSG00000026926	peptidase (mitochondrial processing) alpha [Source:MGI Symbol;Acc:MGI:1918568]	overlapping	0	0.701424	0.466176	0.496093	0.385193	0.460153	0.356816
Chr2:26630001-26650000	2	26630001	26650000	Gm20532	ENSMUSG00000092356	predicted gene 20532 [Source:MGI Symbol;Acc:MGI:5141997]	overlapping	0	0.710168	0.497601	0.470825	0.31962	0.416898	0.348841
Chr2:26840001-26850000	2	26840001	26850000	Abo	ENSMUSG00000015787	ABO blood group (transferase A, alpha 1-3-N-acetylgalactosaminyltransferase, transferase B, alpha 1-3-galactosyltransferase) [Source:MGI Symbol;Acc:MGI:2135738]	overlapping	0	0.586194	0.455684	0.570512	1.1777	0.889382	0.330945
Chr2:26870001-27000000	2	26870001	27000000	Surf6	ENSMUSG00000036160	surfeit gene 6 [Source:MGI Symbol;Acc:MGI:98447]	overlapping	0	0.599171	0.482236	0.441787	0.513402	0.404702	0.299721
Chr2:27020001-27370000	2	27020001	27370000	5930434B04Rik	ENSMUSG00000015488	RIKEN cDNA 5930434B04 gene [Source:MGI Symbol;Acc:MGI:1924317]	overlapping	0	0.656601	0.486588	0.492489	0.500199	0.521463	0.356004
Chr2:27390001-27430000	2	27390001	27430000	Vav2	ENSMUSG00000009621	vav 2 oncogene [Source:MGI Symbol;Acc:MGI:102718]	overlapping	0	0.64856	0.440063	0.47866	0.598083	0.49783	0.265217
Chr2:27450001-27480000	2	27450001	27480000	Brd3	ENSMUSG00000026918	bromodomain containing 3 [Source:MGI Symbol;Acc:MGI:1914632]	overlapping	0	0.651096	0.505415	0.388306	0.308875	0.461588	0.329766
Chr2:27560001-27610000	2	27560001	27610000	null			Not found	0	0.65506	0.482988	0.529518	0.633237	0.434063	0.36888
Chr2:27630001-27650000	2	27630001	27650000	null			Not found	0	0.710098	0.526888	0.534482	0.396005	0.362535	0.271022
Chr2:27670001-27790000	2	27670001	27790000	Rxra	ENSMUSG00000015846	retinoid X receptor alpha [Source:MGI Symbol;Acc:MGI:98214]	overlapping	0	0.697952	0.539996	0.47188	0.464826	0.396563	0.397298
Chr2:27840001-28040000	2	27840001	28040000	2810430I11Rik	ENSMUSG00000085766	RIKEN cDNA 2810430I11 gene [Source:MGI Symbol;Acc:MGI:3590515]	overlapping	0	0.641875	0.476301	0.511968	0.366643	0.437175	0.411013
Chr2:28060001-28120000	2	28060001	28120000	Fcnb	ENSMUSG00000026835	ficolin B [Source:MGI Symbol;Acc:MGI:1341158]	overlapping	0	0.650128	0.493917	0.52758	0.611699	0.600205	0.374189
Chr2:28150001-28310000	2	28150001	28310000	Olfm1	ENSMUSG00000026833	olfactomedin 1 [Source:MGI Symbol;Acc:MGI:1860437]	overlapping	0	0.628483	0.494708	0.509865	0.498179	0.474429	0.385187
Chr2:28330001-28340000	2	28330001	28340000	null			Not found	0	0.641371	0.480848	0.455881	0.449542	0.357641	0.379246
Chr2:28370001-28380000	2	28370001	28380000	null			Not found	0	0.590205	0.503939	0.278537	0.593544	0.592222	0.475866
Chr2:28500001-28580000	2	28500001	28580000	Gbgt1	ENSMUSG00000026829	globoside alpha-1,3-N-acetylgalactosaminyltransferase 1 [Source:MGI Symbol;Acc:MGI:2449143]	overlapping	0	0.687246	0.482945	0.422236	0.47239	0.444997	0.300996
Chr2:28610001-28630000	2	28610001	28630000	Gfi1b	ENSMUSG00000026815	growth factor independent 1B [Source:MGI Symbol;Acc:MGI:1276578]	overlapping	0	0.656926	0.488317	0.413321	0.526236	0.578763	0.28713
Chr2:28690001-28720000	2	28690001	28720000	Tsc1	ENSMUSG00000026812	tuberous sclerosis 1 [Source:MGI Symbol;Acc:MGI:1929183]	overlapping	0	0.680643	0.551895	0.342134	0.407799	0.347153	0.449633
Chr2:28740001-28790000	2	28740001	28790000	Ak8	ENSMUSG00000026807	adenylate kinase 8 [Source:MGI Symbol;Acc:MGI:1916120]	overlapping	0	0.580662	0.505767	0.411605	0.385174	0.45483	0.398583
Chr2:28940001-29000000	2	28940001	29000000	1700101E01Rik	ENSMUSG00000079502	RIKEN cDNA 1700101E01 gene [Source:MGI Symbol;Acc:MGI:2685669]	overlapping	0	0.606545	0.432005	0.432117	0.257849	0.488216	0.409369
Chr2:29020001-29030000	2	29020001	29030000	1700101E01Rik	ENSMUSG00000079502	RIKEN cDNA 1700101E01 gene [Source:MGI Symbol;Acc:MGI:2685669]	overlapping	0	0.639156	0.457946	0.428634	0.323695	0.331071	0.377463
Chr2:29190001-29280000	2	29190001	29280000	Ntng2	ENSMUSG00000035513	netrin G2 [Source:MGI Symbol;Acc:MGI:2159341]	overlapping	0	0.646994	0.439756	0.442072	0.38185	0.362224	0.338111
Chr2:29490001-29580000	2	29490001	29580000	Med27	ENSMUSG00000026799	mediator complex subunit 27 [Source:MGI Symbol;Acc:MGI:1916225]	overlapping	0	0.587761	0.408953	0.415936	0.33879	0.436612	0.353019
Chr2:29600001-29610000	2	29600001	29610000	null			Not found	0	0.572504	0.572927	0.368146	0.261081	0.352747	0.43649
Chr2:29630001-29640000	2	29630001	29640000	Rapgef1	ENSMUSG00000039844	Rap guanine nucleotide exchange factor (GEF) 1 [Source:MGI Symbol;Acc:MGI:104580]	overlapping	0	0.605691	0.454412	0.343495	0.34185	0.386658	0.432933
Chr2:29660001-29820000	2	29660001	29820000	Rapgef1	ENSMUSG00000039844	Rap guanine nucleotide exchange factor (GEF) 1 [Source:MGI Symbol;Acc:MGI:104580]	overlapping	0	0.607145	0.464797	0.363266	0.412168	0.456883	0.350186
Chr2:29840001-29890000	2	29840001	29890000	Urm1	ENSMUSG00000069020	ubiquitin related modifier 1 homolog (S. cerevisiae) [Source:MGI Symbol;Acc:MGI:1915455]	overlapping	0	0.593661	0.460227	0.363068	0.523544	0.532231	0.28695
Chr2:30030001-30040000	2	30030001	30040000	Spna2	ENSMUSG00000057738	spectrin alpha 2 [Source:MGI Symbol;Acc:MGI:98386]	overlapping	0	0.64151	0.554549	0.357691	0.549085	0.492936	0.382831
Chr2:30060001-30120000	2	30060001	30120000	Set	ENSMUSG00000054766	SET nuclear oncogene [Source:MGI Symbol;Acc:MGI:1860267]	overlapping	0	0.573841	0.438343	0.346363	0.302927	0.349192	0.341397
Chr2:30140001-30150000	2	30140001	30150000	Tbc1d13	ENSMUSG00000039678	TBC1 domain family, member 13 [Source:MGI Symbol;Acc:MGI:2385326]	overlapping	0	0.60597	0.44183	0.349101	0.350618	0.302054	0.305917
Chr2:30170001-30210000	2	30170001	30210000	Endog	ENSMUSG00000015337	endonuclease G [Source:MGI Symbol;Acc:MGI:1261433]	overlapping	0	0.563654	0.450135	0.352281	0.469734	0.618093	0.402512
Chr2:30230001-30240000	2	30230001	30240000	Lrrc8a	ENSMUSG00000007476	leucine rich repeat containing 8A [Source:MGI Symbol;Acc:MGI:2652847]	overlapping	0	0.609702	0.446354	0.391671	0.845857	0.642914	0.377472
Chr2:30280001-30290000	2	30280001	30290000	Lrrc8a	ENSMUSG00000007476	leucine rich repeat containing 8A [Source:MGI Symbol;Acc:MGI:2652847]	overlapping	0	0.645242	0.567131	0.482768	0.962317	0.306949	0.389991
Chr2:30330001-30500000	2	30330001	30500000	Nup188	ENSMUSG00000052533	nucleoporin 188 [Source:MGI Symbol;Acc:MGI:2446190]	overlapping	0	0.653311	0.454051	0.329818	0.46243	0.511629	0.362316
Chr2:30520001-30550000	2	30520001	30550000	Gm14487	ENSMUSG00000085275	predicted gene 14487 [Source:MGI Symbol;Acc:MGI:3649724]	overlapping	0	0.58813	0.432594	0.409463	0.308875	0.505871	0.326184
Chr2:30580001-30620000	2	30580001	30620000	Cstad	ENSMUSG00000047363	CSA-conditional, T cell activation-dependent protein [Source:MGI Symbol;Acc:MGI:1925867]	overlapping	0	0.596152	0.465957	0.499758	0.31258	0.369789	0.311737
Chr2:30640001-30730000	2	30640001	30730000	9330198N18Rik	ENSMUSG00000086405	RIKEN cDNA 9330198N18 gene [Source:MGI Symbol;Acc:MGI:1924766]	overlapping	0	0.692612	0.446123	0.449913	0.415868	0.510494	0.356994
Chr2:30750001-30910000	2	30750001	30910000	1700001O22Rik	ENSMUSG00000044320	RIKEN cDNA 1700001O22 gene [Source:MGI Symbol;Acc:MGI:1923631]	overlapping	0	0.610895	0.420716	0.43316	0.437918	0.388165	0.36674
Chr2:30950001-30960000	2	30950001	30960000	Tor1b	ENSMUSG00000026848	torsin family 1, member B [Source:MGI Symbol;Acc:MGI:1353605]	overlapping	0	0.584258	0.427976	0.486509	0.431387	0.333518	0.386415
Chr2:31000001-31020000	2	31000001	31020000	Usp20	ENSMUSG00000026854	ubiquitin specific peptidase 20 [Source:MGI Symbol;Acc:MGI:1921520]	overlapping	0	0.689633	0.477455	0.295716	0.292388	0.454305	0.482125
Chr2:31190001-31220000	2	31190001	31220000	Gpr107	ENSMUSG00000000194	G protein-coupled receptor 107 [Source:MGI Symbol;Acc:MGI:2139054]	overlapping	0	0.642016	0.518908	0.451777	0.54011	0.553417	0.336926
Chr2:31240001-31300000	2	31240001	31300000	Ncs1	ENSMUSG00000062661	neuronal calcium sensor 1 [Source:MGI Symbol;Acc:MGI:109166]	overlapping	0	0.652709	0.494341	0.418984	0.413748	0.501501	0.345573
Chr2:31330001-31460000	2	31330001	31460000	Hmcn2	ENSMUSG00000055632	hemicentin 2 [Source:MGI Symbol;Acc:MGI:2677838]	overlapping	0	0.717778	0.48154	0.496269	0.470395	0.501004	0.393571
Chr2:31480001-31510000	2	31480001	31510000	Ass1	ENSMUSG00000076441	argininosuccinate synthetase 1 [Source:MGI Symbol;Acc:MGI:88090]	overlapping	0	0.568586	0.377758	0.344372	0.485646	0.555864	0.431738
Chr2:31530001-31540000	2	31530001	31540000	null			Not found	0	0.611637	0.422274	0.49471	0.549085	0.43735	0.332747
Chr2:31610001-31660000	2	31610001	31660000	Fubp3	ENSMUSG00000026843	far upstream element (FUSE) binding protein 3 [Source:MGI Symbol;Acc:MGI:2443699]	overlapping	0	0.603479	0.467776	0.403316	0.419112	0.472659	0.325232
Chr2:31780001-31930000	2	31780001	31930000	Abl1	ENSMUSG00000026842	c-abl oncogene 1, non-receptor tyrosine kinase [Source:MGI Symbol;Acc:MGI:87859]	overlapping	0	0.666981	0.505682	0.409363	0.41982	0.485897	0.344788
Chr2:31950001-31960000	2	31950001	31960000	Aif1l	ENSMUSG00000001864	allograft inflammatory factor 1-like [Source:MGI Symbol;Acc:MGI:1919598]	overlapping	0	0.688526	0.572927	0.373753	0.360005	0.495383	0.296965
Chr2:32050001-32060000	2	32050001	32060000	Nup214	ENSMUSG00000001855	nucleoporin 214 [Source:MGI Symbol;Acc:MGI:1095411]	overlapping	0	0.694333	0.413037	0.359557	0.288004	0.251362	0.33453
Chr2:32080001-32110000	2	32080001	32110000	Fam78a	ENSMUSG00000050592	family with sequence similarity 78, member A [Source:MGI Symbol;Acc:MGI:2443569]	overlapping	0	0.656304	0.413399	0.408847	0.446826	0.408449	0.361369
Chr2:32150001-32160000	2	32150001	32160000	Prrc2b	ENSMUSG00000039262	proline-rich coiled-coil 2B [Source:MGI Symbol;Acc:MGI:1923304]	overlapping	0	0.593937	0.367045	0.322224	0.566621	0.304502	0.475866
Chr2:32180001-32230000	2	32180001	32230000	Prrc2b	ENSMUSG00000039262	proline-rich coiled-coil 2B [Source:MGI Symbol;Acc:MGI:1923304]	overlapping	0	0.659375	0.464336	0.395552	0.356126	0.461122	0.448308
Chr2:32250001-32280000	2	32250001	32280000	Pomt1	ENSMUSG00000039254	protein-O-mannosyltransferase 1 [Source:MGI Symbol;Acc:MGI:2138994]	overlapping	0	0.671564	0.391188	0.460244	0.785547	0.638836	0.358394
Chr2:32300001-32430000	2	32300001	32430000	Golga2	ENSMUSG00000002546	golgi autoantigen, golgin subfamily a, 2 [Source:MGI Symbol;Acc:MGI:2139395]	overlapping	0	0.676708	0.450033	0.406487	0.406194	0.439124	0.363574
Chr2:32510001-32530000	2	32510001	32530000	Gm13412	ENSMUSG00000085017	predicted gene 13412 [Source:MGI Symbol;Acc:MGI:3650612]	overlapping	0	0.591103	0.437754	0.426579	0.422619	0.327401	0.484804
Chr2:32550001-32600000	2	32550001	32600000	Fam102a	ENSMUSG00000039157	family with sequence similarity 102, member A [Source:MGI Symbol;Acc:MGI:2138935]	overlapping	0	0.628647	0.49474	0.388679	0.354373	0.397285	0.430429
Chr2:32620001-32640000	2	32620001	32640000	St6galnac6	ENSMUSG00000026811	ST6 euraminyl-2,3-beta-galactosyl-1,3)-N-acetylgalactosaminide alpha-2,6-sialyltransferase 6 [Source:MGI Symbol;Acc:MGI:1355316]	overlapping	0	0.722889	0.558036	0.460546	0.314927	0.445915	0.333647
Chr2:32670001-32690000	2	32670001	32690000	Eng	ENSMUSG00000026814	endoglin [Source:MGI Symbol;Acc:MGI:95392]	overlapping	0	0.745638	0.35378	0.381022	0.409158	0.532965	0.366741
Chr2:32710001-32720000	2	32710001	32720000	Cdk9	ENSMUSG00000009555	cyclin-dependent kinase 9 (CDC2-related kinase) [Source:MGI Symbol;Acc:MGI:1328368]	overlapping	0	0.607766	0.376281	0.34985	0.314927	0.500278	0.266559
Chr2:32740001-32790000	2	32740001	32790000	Sh2d3c	ENSMUSG00000059013	SH2 domain containing 3C [Source:MGI Symbol;Acc:MGI:1351631]	overlapping	0	0.627514	0.432575	0.393385	0.444281	0.449516	0.382117
Chr2:32860001-32930000	2	32860001	32930000	Gm13523	ENSMUSG00000087496	predicted gene 13523 [Source:MGI Symbol;Acc:MGI:3651426]	overlapping	0	0.652255	0.470232	0.383293	0.381917	0.366281	0.359582
Chr2:32950001-32980000	2	32950001	32980000	Lrsam1	ENSMUSG00000026792	leucine rich repeat and sterile alpha motif containing 1 [Source:MGI Symbol;Acc:MGI:2684789]	overlapping	0	0.651741	0.494341	0.400128	0.452671	0.408449	0.305917
Chr2:33020001-33030000	2	33020001	33030000	Garnl3	ENSMUSG00000038860	GTPase activating RANGAP domain-like 3 [Source:MGI Symbol;Acc:MGI:2139309]	overlapping	0	0.594076	0.562607	0.314752	0.593544	0.526847	0.554581
Chr2:33130001-33170000	2	33130001	33170000	Garnl3	ENSMUSG00000038860	GTPase activating RANGAP domain-like 3 [Source:MGI Symbol;Acc:MGI:2139309]	overlapping	0	0.688042	0.489	0.392225	0.46566	0.584881	0.475402
Chr2:33200001-33260000	2	33200001	33260000	Ralgps1	ENSMUSG00000038831	Ral GEF with PH domain and SH3 binding motif 1 [Source:MGI Symbol;Acc:MGI:1922008]	overlapping	0	0.633881	0.509295	0.406101	0.352286	0.56507	0.399531
Chr2:33280001-33290000	2	33280001	33290000	Ralgps1	ENSMUSG00000038831	Ral GEF with PH domain and SH3 binding motif 1 [Source:MGI Symbol;Acc:MGI:1922008]	overlapping	0	0.62367	0.584426	0.333418	0.683082	0.579986	0.474082
Chr2:33340001-33350000	2	33340001	33350000	Ralgps1	ENSMUSG00000038831	Ral GEF with PH domain and SH3 binding motif 1 [Source:MGI Symbol;Acc:MGI:1922008]	overlapping	0	0.713969	0.639654	0.300565	0.737546	0.669484	0.429366
Chr2:33560001-33740000	2	33560001	33740000	Lmx1b	ENSMUSG00000038765	LIM homeobox transcription factor 1 beta [Source:MGI Symbol;Acc:MGI:1100513]	overlapping	0	0.654975	0.478089	0.382934	0.357781	0.457957	0.33016
Chr2:33770001-33850000	2	33770001	33850000	Fam125b	ENSMUSG00000038740	family with sequence similarity 125, member B [Source:MGI Symbol;Acc:MGI:1919793]	overlapping	0	0.552953	0.462075	0.354328	0.53641	0.646498	0.411688
Chr2:33870001-33930000	2	33870001	33930000	Fam125b	ENSMUSG00000038740	family with sequence similarity 125, member B [Source:MGI Symbol;Acc:MGI:1919793]	overlapping	0	0.547889	0.475704	0.481341	0.483135	0.455179	0.309191
Chr2:33970001-33980000	2	33970001	33980000	Gm13404	ENSMUSG00000086904	predicted gene 13404 [Source:MGI Symbol;Acc:MGI:3649379]	overlapping	0	0.639296	0.555727	0.38794	0.369391	0.447138	0.409669
Chr2:34020001-34160000	2	34020001	34160000	C230014O12Rik	ENSMUSG00000087461	RIKEN cDNA C230014O12 gene [Source:MGI Symbol;Acc:MGI:3045377]	overlapping	0	0.622405	0.453624	0.508855	0.58916	0.452457	0.407628
Chr2:34510001-34520000	2	34510001	34520000	Mapkap1	ENSMUSG00000038696	mitogen-activated protein kinase associated protein 1 [Source:MGI Symbol;Acc:MGI:2444554]	overlapping	0	0.607766	0.376187	0.473818	0.252313	0.357641	0.309483
Chr2:34620001-34660000	2	34620001	34660000	Mapkap1	ENSMUSG00000038696	mitogen-activated protein kinase associated protein 1 [Source:MGI Symbol;Acc:MGI:2444554]	overlapping	0	0.608838	0.420825	0.407816	0.323695	0.444079	0.340791
Chr2:34890001-34920000	2	34890001	34920000	D730039F16Rik	ENSMUSG00000026870	RIKEN cDNA D730039F16 gene [Source:MGI Symbol;Acc:MGI:1925246]	overlapping	0	0.585549	0.429484	0.395403	0.488775	0.519622	0.433518
Chr2:34940001-34980000	2	34940001	34980000	Traf1	ENSMUSG00000026875	TNF receptor-associated factor 1 [Source:MGI Symbol;Acc:MGI:101836]	overlapping	0	0.590689	0.467677	0.443475	0.474737	0.535937	0.311728
Chr2:35150001-35180000	2	35150001	35180000	Cep110	ENSMUSG00000057110	centrosomal protein 110 [Source:MGI Symbol;Acc:MGI:1889576]	overlapping	0	0.51599	0.485529	0.406104	0.392979	0.490605	0.356007
Chr2:35200001-35210000	2	35200001	35210000	Rab14	ENSMUSG00000026878	RAB14, member RAS oncogene family [Source:MGI Symbol;Acc:MGI:1915615]	overlapping	0	0.588269	0.536171	0.407724	0.350618	0.302054	0.259399
Chr2:35250001-35320000	2	35250001	35320000	Gsn	ENSMUSG00000026879	gelsolin [Source:MGI Symbol;Acc:MGI:95851]	overlapping	0	0.657806	0.460868	0.501598	0.404818	0.408083	0.362901
Chr2:35430001-35450000	2	35430001	35450000	Ggta1	ENSMUSG00000035778	glycoprotein galactosyltransferase alpha 1, 3 [Source:MGI Symbol;Acc:MGI:95704]	overlapping	0	0.679536	0.53332	0.402685	0.319002	0.537685	0.422197
Chr2:35490001-35510000	2	35490001	35510000	Gm13447	ENSMUSG00000085668	predicted gene 13447 [Source:MGI Symbol;Acc:MGI:3650187]	overlapping	0	0.691429	0.457899	0.483147	1.53332	0.847081	0.355114
Chr2:35550001-35790000	2	35550001	35790000	Gm13446	ENSMUSG00000086555	predicted gene 13446 [Source:MGI Symbol;Acc:MGI:3649869]	overlapping	0	0.688457	0.517443	0.478478	0.408607	0.459389	0.40065
Chr2:35830001-35850000	2	35830001	35850000	Ttll11	ENSMUSG00000026885	tubulin tyrosine ligase-like family, member 11 [Source:MGI Symbol;Acc:MGI:1921660]	overlapping	0	0.609702	0.512586	0.417611	0.350927	0.470037	0.383736
Chr2:35870001-35880000	2	35870001	35880000	Ttll11	ENSMUSG00000026885	tubulin tyrosine ligase-like family, member 11 [Source:MGI Symbol;Acc:MGI:1921660]	overlapping	0	0.596012	0.606338	0.390544	0.476465	0.478602	0.393566
Chr2:35950001-36100000	2	35950001	36100000	Ttll11	ENSMUSG00000026885	tubulin tyrosine ligase-like family, member 11 [Source:MGI Symbol;Acc:MGI:1921660]	overlapping	0	0.612828	0.484665	0.458402	0.513359	0.514751	0.317836
Chr2:36200001-36240000	2	36200001	36240000	Gm13429	ENSMUSG00000085141	predicted gene 13429 [Source:MGI Symbol;Acc:MGI:3651652]	overlapping	0	0.63978	0.468243	0.499947	0.413696	0.431319	0.373433
Chr2:37730001-37830000	2	37730001	37830000	Crb2	ENSMUSG00000035403	crumbs homolog 2 (Drosophila) [Source:MGI Symbol;Acc:MGI:2679260]	overlapping	0	0.736691	0.548546	0.439984	0.326697	0.461332	0.336147
Chr2:37850001-37890000	2	37850001	37890000	Dennd1a	ENSMUSG00000035392	DENN/MADD domain containing 1A [Source:MGI Symbol;Acc:MGI:2442794]	overlapping	0	0.555113	0.516862	0.420698	0.343887	0.35161	0.373005
Chr2:38320001-38430000	2	38320001	38430000	Lhx2	ENSMUSG00000000247	LIM homeobox protein 2 [Source:MGI Symbol;Acc:MGI:96785]	overlapping	0	0.602964	0.49681	0.448387	0.398256	0.348456	0.328359
Chr2:38460001-38590000	2	38460001	38590000	U6	ENSMUSG00000064468	U6 spliceosomal RNA [Source:RFAM;Acc:RF00026]	overlapping	0	0.676229	0.531343	0.531767	0.376383	0.474407	0.385314
Chr2:38670001-38720000	2	38670001	38720000	Gm13587	ENSMUSG00000087062	predicted gene 13587 [Source:MGI Symbol;Acc:MGI:3712464]	overlapping	0	0.733689	0.473318	0.374789	0.475206	0.412808	0.269776
Chr2:38940001-39020000	2	38940001	39020000	Olfml2a	ENSMUSG00000046618	olfactomedin-like 2A [Source:MGI Symbol;Acc:MGI:2444741]	overlapping	0	0.630774	0.458341	0.411879	0.337311	0.402346	0.279301
Chr2:39300001-39310000	2	39300001	39310000	null			Not found	0	0.570569	0.568309	0.585447	0.872161	0.584881	0.606466
Chr2:39400001-39410000	2	39400001	39410000	null			Not found	0	0.615509	0.48556	0.607106	1.2234	0.727517	0.352434
Chr2:44970001-44980000	2	44970001	44980000	null			Not found	0	0.570429	0.455684	0.441704	0.557853	0.444691	0.381047
Chr2:45810001-45820000	2	45810001	45820000	null			Not found	0	0.582322	0.526935	0.532422	1.53017	0.529294	0.350642
Chr2:49330001-49400000	2	49330001	49400000	SNORA29	ENSMUSG00000077769	Small nucleolar RNA SNORA29 [Source:RFAM;Acc:RF00429]	overlapping	0	0.623274	0.468098	0.511519	0.417785	0.461572	0.357791
Chr2:49420001-49430000	2	49420001	49430000	null			Not found	0	0.698344	0.532731	0.553711	0.602931	0.500278	0.186043
Chr2:49580001-49620000	2	49580001	49620000	Kif5c	ENSMUSG00000026764	kinesin family member 5C [Source:MGI Symbol;Acc:MGI:1098269]	overlapping	0	0.583739	0.478857	0.51161	0.541735	0.338413	0.316643
Chr2:49650001-49660000	2	49650001	49660000	Kif5c	ENSMUSG00000026764	kinesin family member 5C [Source:MGI Symbol;Acc:MGI:1098269]	overlapping	0	0.682579	0.44871	0.417061	0.476465	0.241574	0.470498
Chr2:49690001-49720000	2	49690001	49720000	Kif5c	ENSMUSG00000026764	kinesin family member 5C [Source:MGI Symbol;Acc:MGI:1098269]	overlapping	0	0.557292	0.50774	0.400258	0.485852	0.372207	0.355406
Chr2:49740001-49750000	2	49740001	49750000	Kif5c	ENSMUSG00000026764	kinesin family member 5C [Source:MGI Symbol;Acc:MGI:1098269]	overlapping	0	0.765275	0.411859	0.375619	0.251694	0.613897	0.343491
Chr2:49780001-49790000	2	49780001	49790000	Lypd6b	ENSMUSG00000026765	LY6/PLAUR domain containing 6B [Source:MGI Symbol;Acc:MGI:1919147]	overlapping	0	0.659211	0.486644	0.473818	0.117079	0.616345	0.28803
Chr2:50020001-50030000	2	50020001	50030000	null			Not found	0	0.623252	0.379627	0.544374	0.323695	0.224793	0.415046
Chr2:50120001-50130000	2	50120001	50130000	Lypd6	ENSMUSG00000050447	LY6/PLAUR domain containing 6 [Source:MGI Symbol;Acc:MGI:2443848]	overlapping	0	0.623531	0.574106	0.776609	0.233539	0.492936	0.26655
Chr2:50150001-50160000	2	50150001	50160000	Lypd6	ENSMUSG00000050447	LY6/PLAUR domain containing 6 [Source:MGI Symbol;Acc:MGI:2443848]	overlapping	0	0.586333	0.500499	0.563788	0.548466	0.253809	0.347067
Chr2:50200001-50230000	2	50200001	50230000	null			Not found	0	0.60136	0.418017	0.561054	0.350824	0.30928	0.294581
Chr2:50440001-50450000	2	50440001	50450000	null			Not found	0	0.586333	0.577546	0.562301	0.368773	0.500278	0.384632
Chr2:50580001-50590000	2	50580001	50590000	null			Not found	0	0.570429	0.406063	0.34537	0.234158	0.415674	0.193212
Chr2:50670001-50710000	2	50670001	50710000	null			Not found	0	0.50948	0.35378	0.34649	0.431542	0.28877	0.262525
Chr2:50910001-50920000	2	50910001	50920000	null			Not found	0	0.584398	0.539611	0.521597	0.666163	0.43735	0.651164
Chr2:51530001-51550000	2	51530001	51550000	null			Not found	0	0.630376	0.533226	0.525896	0.256387	0.389105	0.366736
Chr2:51780001-51800000	2	51780001	51800000	null			Not found	0	0.608873	0.426845	0.43909	1.01209	0.525624	0.34169
Chr2:51920001-51930000	2	51920001	51930000	Rbm43	ENSMUSG00000036249	RNA binding motif protein 43 [Source:MGI Symbol;Acc:MGI:1918934]	overlapping	0	0.690462	0.569487	0.479775	0.422619	0.415674	0.411444
Chr2:51990001-52000000	2	51990001	52000000	null			Not found	0	0.603894	0.502666	0.393158	0.467697	0.553417	0.182486
Chr2:52130001-52140000	2	52130001	52140000	Neb	ENSMUSG00000026950	nebulin [Source:MGI Symbol;Acc:MGI:97292]	overlapping	0	0.648974	0.400455	0.395024	0.827702	0.447138	0.305926
Chr2:52380001-52390000	2	52380001	52390000	Gm13522	ENSMUSG00000086447	predicted gene 13522 [Source:MGI Symbol;Acc:MGI:3651428]	overlapping	0	0.708162	0.497059	0.530187	0.323695	0.514611	0.416811
Chr2:52640001-52650000	2	52640001	52650000	Cacnb4	ENSMUSG00000017412	calcium channel, voltage-dependent, beta 4 subunit [Source:MGI Symbol;Acc:MGI:103301]	overlapping	0	0.737756	0.75817	0.528321	0.620467	0.579986	0.411453
Chr2:52840001-52860000	2	52840001	52860000	Fmnl2	ENSMUSG00000036053	formin-like 2 [Source:MGI Symbol;Acc:MGI:1918659]	overlapping	0	0.620488	0.422227	0.371693	0.243235	0.358864	0.178009
Chr2:52880001-52890000	2	52880001	52890000	Fmnl2	ENSMUSG00000036053	formin-like 2 [Source:MGI Symbol;Acc:MGI:1918659]	overlapping	0	0.607905	0.370485	0.387182	0.170925	0.468814	0.24689
Chr2:52960001-52970000	2	52960001	52970000	Fmnl2	ENSMUSG00000036053	formin-like 2 [Source:MGI Symbol;Acc:MGI:1918659]	overlapping	0	0.666675	0.576462	0.437972	0.18908	0.444691	0.275503
Chr2:53390001-53400000	2	53390001	53400000	null			Not found	0	0.623391	0.391219	0.493223	0.476465	0.381763	0.50447
Chr2:54600001-54610000	2	54600001	54610000	Galnt13	ENSMUSG00000060988escription=UDP-N-acetyl-alpha-D-galactosamine:polypeptideN-acetylgalactosaminyltransferase 13 [Source:MGISymbol;Acc:MGI:2139447]	No description	overlapping	0	0.598227	0.355453	0.380098	0.377541	0.415674	0.49196
Chr2:57300001-57310000	2	57300001	57310000	Gpd2	ENSMUSG00000026827	glycerol phosphate dehydrogenase 2, mitochondrial [Source:MGI Symbol;Acc:MGI:99778]	overlapping	0	0.578312	0.544229	0.451411	0.098924	0.476155	0.407877
Chr2:58480001-58490000	2	58480001	58490000	Acvr1	ENSMUSG00000026836	activin A receptor, type 1 [Source:MGI Symbol;Acc:MGI:87911]	overlapping	0	0.692258	0.469444	0.458135	0.216003	0.280379	0.159222
Chr2:58550001-58560000	2	58550001	58560000	Acvr1	ENSMUSG00000026836	activin A receptor, type 1 [Source:MGI Symbol;Acc:MGI:87911]	overlapping	0	0.613713	0.354369	0.369643	0.368773	0.466366	0.447226
Chr2:58620001-58630000	2	58620001	58630000	Upp2	ENSMUSG00000026839	uridine phosphorylase 2 [Source:MGI Symbol;Acc:MGI:1923904]	overlapping	0	0.63722	0.418834	0.447301	0.360005	0.379316	0.515214
Chr2:58770001-58780000	2	58770001	58780000	Upp2	ENSMUSG00000026839	uridine phosphorylase 2 [Source:MGI Symbol;Acc:MGI:1923904]	overlapping	0	0.590205	0.489	0.577975	0.449542	0.531741	0.635061
Chr2:58830001-58840000	2	58830001	58840000	Ccdc148	ENSMUSG00000036641	coiled-coil domain containing 148 [Source:MGI Symbol;Acc:MGI:3039583]	overlapping	0	0.596012	0.498142	0.520479	0.333082	0.439797	0.161015
Chr2:59170001-59200000	2	59170001	59200000	Pkp4	ENSMUSG00000026991	plakophilin 4 [Source:MGI Symbol;Acc:MGI:109281]	overlapping	0	0.532953	0.384669	0.379473	0.419696	0.476854	0.370912
Chr2:59370001-59430000	2	59370001	59430000	5330411J11Rik	ENSMUSG00000087455	RIKEN cDNA 5330411J11 gene [Source:MGI Symbol;Acc:MGI:1923926]	overlapping	0	0.561326	0.528066	0.480844	0.599905	0.420918	0.305915
Chr2:59460001-59470000	2	59460001	59470000	null			Not found	0	0.58813	0.660389	0.492475	0.729396	0.563205	0.350633
Chr2:59510001-59540000	2	59510001	59540000	null			Not found	0	0.720654	0.441374	0.45041	0.386928	0.45751	0.330354
Chr2:59560001-59570000	2	59560001	59570000	null			Not found	0	0.633488	0.552287	0.353212	0.405083	0.476155	0.254032
Chr2:59640001-59650000	2	59640001	59650000	Tanc1	ENSMUSG00000035168	tetratricopeptide repeat, ankyrin repeat and coiled-coil containing 1 [Source:MGI Symbol;Acc:MGI:1914110]	overlapping	0	0.651049	0.599364	0.338646	0.360005	0.381763	0.314869
Chr2:59670001-59690000	2	59670001	59690000	Tanc1	ENSMUSG00000035168	tetratricopeptide repeat, ankyrin repeat and coiled-coil containing 1 [Source:MGI Symbol;Acc:MGI:1914110]	overlapping	0	0.612884	0.601626	0.348543	0.391312	0.374596	0.316643
Chr2:59770001-59780000	2	59770001	59780000	Tanc1	ENSMUSG00000035168	tetratricopeptide repeat, ankyrin repeat and coiled-coil containing 1 [Source:MGI Symbol;Acc:MGI:1914110]	overlapping	0	0.619659	0.503939	0.23037	0.37816	0.609003	0.504479
Chr2:59810001-59850000	2	59810001	59850000	Tanc1	ENSMUSG00000035168	tetratricopeptide repeat, ankyrin repeat and coiled-coil containing 1 [Source:MGI Symbol;Acc:MGI:1914110]	overlapping	0	0.613713	0.525509	0.339392	0.492583	0.600001	0.393111
Chr2:59880001-59890000	2	59880001	59890000	Wdsub1	ENSMUSG00000026988	WD repeat, SAM and U-box domain containing 1 [Source:MGI Symbol;Acc:MGI:1919387]	overlapping	0	0.617724	0.423357	0.384947	0.413851	0.253809	0.300549
Chr2:60130001-60140000	2	60130001	60140000	Baz2b	ENSMUSG00000026987	bromodomain adjacent to zinc finger domain, 2B [Source:MGI Symbol;Acc:MGI:2442782]	overlapping	0	0.631413	0.404979	0.354329	0.314927	0.531741	0.327379
Chr2:60280001-60290000	2	60280001	60290000	Cd302	ENSMUSG00000060703	CD302 antigen [Source:MGI Symbol;Acc:MGI:1913455]	overlapping	0	0.584119	0.533815	0.538786	0.288004	0.357641	0.459753
Chr2:60360001-60380000	2	60360001	60380000	Ly75	ENSMUSG00000026980	lymphocyte antigen 75 [Source:MGI Symbol;Acc:MGI:106662]	overlapping	0	0.629408	0.478586	0.491358	0.382235	0.387881	0.500903
Chr2:60470001-60500000	2	60470001	60500000	Pla2r1	ENSMUSG00000054580	phospholipase A2 receptor 1 [Source:MGI Symbol;Acc:MGI:102468]	overlapping	0	0.514101	0.473214	0.473563	0.503594	0.361719	0.518204
Chr2:60540001-60560000	2	60540001	60560000	Pla2r1	ENSMUSG00000054580	phospholipase A2 receptor 1 [Source:MGI Symbol;Acc:MGI:102468]	overlapping	0	0.633279	0.502713	0.478473	0.427622	0.34925	0.417717
Chr2:60610001-60620000	2	60610001	60620000	Itgb6	ENSMUSG00000026971	integrin beta 6 [Source:MGI Symbol;Acc:MGI:96615]	overlapping	0	0.598087	0.327932	0.488735	0.278617	0.584881	0.309492
Chr2:60690001-60720000	2	60690001	60720000	Itgb6	ENSMUSG00000026971	integrin beta 6 [Source:MGI Symbol;Acc:MGI:96615]	overlapping	0	0.565221	0.491624	0.502186	0.320772	0.331887	0.482416
Chr2:60740001-60770000	2	60740001	60770000	Rbms1	ENSMUSG00000026970	RNA binding motif, single stranded interacting protein 1 [Source:MGI Symbol;Acc:MGI:1861774]	overlapping	0	0.553374	0.44406	0.523715	0.353953	0.507503	0.517
Chr2:60860001-60870000	2	60860001	60870000	Rbms1	ENSMUSG00000026970	RNA binding motif, single stranded interacting protein 1 [Source:MGI Symbol;Acc:MGI:1861774]	overlapping	0	0.623391	0.553371	0.622032	0.701855	0.408333	0.354209
Chr2:61010001-61020000	2	61010001	61020000	null			Not found	0	0.592001	0.322136	0.437215	0.458929	0.476155	0.475866
Chr2:61280001-61290000	2	61280001	61290000	SNORA17	ENSMUSG00000077464	Small nucleolar RNA SNORA17 [Source:RFAM;Acc:RF00560]	overlapping	0	0.590065	0.449794	0.542508	0.34185	0.360088	0.543854
Chr2:62360001-62370000	2	62360001	62370000	Dpp4	ENSMUSG00000035000	dipeptidylpeptidase 4 [Source:MGI Symbol;Acc:MGI:94919]	overlapping	0	0.611777	0.514259	0.58844	0.351237	0.413227	0.486565
Chr2:62420001-62430000	2	62420001	62430000	Gm13561	ENSMUSG00000087518	predicted gene 13561 [Source:MGI Symbol;Acc:MGI:3651674]	overlapping	0	0.580387	0.419917	0.523093	0.350618	0.418121	0.547403
Chr2:65060001-65070000	2	65060001	65070000	null			Not found	0	0.600162	0.346311	0.51189	0.764469	0.362535	0.391783
Chr2:65280001-65290000	2	65280001	65290000	null			Not found	0	0.583979	0.437118	0.455891	0.242926	0.447138	0.347067
Chr2:65370001-65380000	2	65370001	65380000	SNORA17	ENSMUSG00000088197	Small nucleolar RNA SNORA17 [Source:RFAM;Acc:RF00560]	overlapping	0	0.574301	0.432594	0.574613	0.368773	0.589775	0.298766
Chr2:65410001-65420000	2	65410001	65420000	null			Not found	0	0.602238	0.387685	0.530565	0.971085	0.618792	0.554572
Chr2:65470001-65480000	2	65470001	65480000	Scn3a	ENSMUSG00000057182	sodium channel, voltage-gated, type III, alpha [Source:MGI Symbol;Acc:MGI:98249]	overlapping	0	0.594076	0.449794	0.367777	0.125847	0.193329	0.366745
Chr2:65500001-65510000	2	65500001	65510000	Scn3a	ENSMUSG00000057182	sodium channel, voltage-gated, type III, alpha [Source:MGI Symbol;Acc:MGI:98249]	overlapping	0	0.572365	0.477408	0.457008	0.15277	0.224793	0.329162
Chr2:65970001-65980000	2	65970001	65980000	Csrnp3	ENSMUSG00000044647	cysteine-serine-rich nuclear protein 3 [Source:MGI Symbol;Acc:MGI:1925021]	overlapping	0	0.584258	0.523495	0.429373	0.737546	0.613897	0.36317
Chr2:66190001-66200000	2	66190001	66200000	Ttc21b	ENSMUSG00000034848	tetratricopeptide repeat domain 21B [Source:MGI Symbol;Acc:MGI:1920918]	overlapping	0	0.574301	0.508557	0.547736	0.098924	0.248915	0.255815
Chr2:68210001-68230000	2	68210001	68230000	Stk39	ENSMUSG00000027030	serine/threonine kinase 39, STE20/SPS1 homolog (yeast) [Source:MGI Symbol;Acc:MGI:1858416]	overlapping	0	0.625467	0.442372	0.449541	0.368773	0.385434	0.356902
Chr2:68340001-68350000	2	68340001	68350000	Stk39	ENSMUSG00000027030	serine/threonine kinase 39, STE20/SPS1 homolog (yeast) [Source:MGI Symbol;Acc:MGI:1858416]	overlapping	0	0.600023	0.514353	0.393158	0.377541	0.364982	0.275503
Chr2:68370001-68450000	2	68370001	68450000	Stk39	ENSMUSG00000027030	serine/threonine kinase 39, STE20/SPS1 homolog (yeast) [Source:MGI Symbol;Acc:MGI:1858416]	overlapping	0	0.592901	0.371321	0.478199	0.242926	0.364327	0.453943
Chr2:68840001-68850000	2	68840001	68850000	null			Not found	0	0.578312	0.416477	0.365911	0.458929	0.302054	0.289805
Chr2:69170001-69180000	2	69170001	69180000	Nostrin	ENSMUSG00000034738	nitric oxide synthase trafficker [Source:MGI Symbol;Acc:MGI:3606242]	overlapping	0	0.592001	0.477408	0.361801	0.161538	0.415674	0.452593
Chr2:69290001-69300000	2	69290001	69300000	Abcb11	ENSMUSG00000027048	ATP-binding cassette, sub-family B (MDR/TAP), member 11 [Source:MGI Symbol;Acc:MGI:1351619]	overlapping	0	0.607766	0.322136	0.487996	0.970467	0.444691	0.277286
Chr2:69430001-69440000	2	69430001	69440000	Lrp2	ENSMUSG00000027070	low density lipoprotein receptor-related protein 2 [Source:MGI Symbol;Acc:MGI:95794]	overlapping	0	0.639435	0.417561	0.495098	0.539698	0.415674	0.466913
Chr2:69590001-69600000	2	69590001	69600000	null			Not found	0	0.60597	0.454412	0.411086	0.15277	0.31429	0.259408
Chr2:69680001-69690000	2	69680001	69690000	Kbtbd10	ENSMUSG00000075307	kelch repeat and BTB (POZ) domain containing 10 [Source:MGI Symbol;Acc:MGI:2683854]	overlapping	0	0.595873	0.416477	0.422659	0.269849	0.280379	0.411471
Chr2:69800001-69810000	2	69800001	69810000	Phospho2	ENSMUSG00000027088	phosphatase, orphan 2 [Source:MGI Symbol;Acc:MGI:1920623]	overlapping	0	0.586054	0.424536	0.37113	0.530311	0.360088	0.288021
Chr2:69830001-69860000	2	69830001	69860000	Klhl23	ENSMUSG00000042155	kelch-like 23 (Drosophila) [Source:MGI Symbol;Acc:MGI:2683536]	overlapping	0	0.615602	0.454412	0.406852	0.473955	0.442244	0.329165
Chr2:69890001-69900000	2	69890001	69900000	Ubr3	ENSMUSG00000044308	ubiquitin protein ligase E3 component n-recognin 3 [Source:MGI Symbol;Acc:MGI:1861100]	overlapping	0	0.576515	0.383067	0.269947	0.279236	0.273038	0.209306
Chr2:70030001-70050000	2	70030001	70050000	Gm13631	ENSMUSG00000086132	predicted gene 13631 [Source:MGI Symbol;Acc:MGI:3650760]	overlapping	0	0.599953	0.428023	0.3814	0.391312	0.46759	0.267442
Chr2:70090001-70100000	2	70090001	70100000	Myo3b	ENSMUSG00000042064	myosin IIIB [Source:MGI Symbol;Acc:MGI:2448580]	overlapping	0	0.615788	0.326754	0.527203	0.242926	0.280379	0.461564
Chr2:70160001-70170000	2	70160001	70170000	Myo3b	ENSMUSG00000042064	myosin IIIB [Source:MGI Symbol;Acc:MGI:2448580]	overlapping	0	0.627402	0.392303	0.592162	0.207235	0.270591	0.486574
Chr2:70250001-70260000	2	70250001	70260000	Myo3b	ENSMUSG00000042064	myosin IIIB [Source:MGI Symbol;Acc:MGI:2448580]	overlapping	0	0.594076	0.549931	0.542138	0.971704	0.502725	0.332738
Chr2:70340001-70380000	2	70340001	70380000	Myo3b	ENSMUSG00000042064	myosin IIIB [Source:MGI Symbol;Acc:MGI:2448580]	overlapping	0	0.641371	0.459348	0.480436	0.339658	0.45011	0.404745
Chr2:70460001-70470000	2	70460001	70470000	null			Not found	0	0.658932	0.404979	0.578354	0.296772	0.393999	0.400717
Chr2:70490001-70500000	2	70490001	70500000	1500002O10Rik	ENSMUSG00000087264	RIKEN cDNA 1500002O10 gene [Source:MGI Symbol;Acc:MGI:1916236]	overlapping	0	0.607766	0.552193	0.391302	0.242926	0.309396	0.270126
Chr2:70560001-70570000	2	70560001	70570000	1500002O10Rik	ENSMUSG00000087264	RIKEN cDNA 1500002O10 gene [Source:MGI Symbol;Acc:MGI:1916236]	overlapping	0	0.737756	0.440652	0.378223	0.278617	0.244021	0.262984
Chr2:70590001-70660000	2	70590001	70660000	Gad1	ENSMUSG00000070880	glutamate decarboxylase 1 [Source:MGI Symbol;Acc:MGI:95632]	overlapping	0	0.603775	0.449188	0.471571	0.424137	0.386707	0.304889
Chr2:70910001-70960000	2	70910001	70960000	null			Not found	0	0.573167	0.425968	0.502709	0.350618	0.415185	0.302336
Chr2:71030001-71040000	2	71030001	71040000	Mettl8	ENSMUSG00000041975	methyltransferase like 8 [Source:MGI Symbol;Acc:MGI:2385142]	overlapping	0	0.692397	0.403895	0.439829	0.170925	0.389105	0.186061
Chr2:71110001-71160000	2	71110001	71160000	Cybrd1	ENSMUSG00000027015	cytochrome b reductase 1 [Source:MGI Symbol;Acc:MGI:2654575]	overlapping	0	0.565313	0.394442	0.440873	0.473205	0.412318	0.296963
Chr2:71200001-71210000	2	71200001	71210000	Dync1i2	ENSMUSG00000027012	dynein cytoplasmic 1 intermediate chain 2 [Source:MGI Symbol;Acc:MGI:107750]	downstream	1706	0.578312	0.408419	0.394654	0.269849	0.579986	0.338123
Chr2:71380001-71390000	2	71380001	71390000	Hat1	ENSMUSG00000027018	histone aminotransferase 1 [Source:MGI Symbol;Acc:MGI:96013]	overlapping	0	0.582183	0.398099	0.378593	0.170925	0.309396	0.241513
Chr2:71540001-71550000	2	71540001	71550000	Dlx2	ENSMUSG00000023391	distal-less homeobox 2 [Source:MGI Symbol;Acc:MGI:94902]	overlapping	0	0.733745	0.29914	0.270326	0.351237	0.282826	0.25405
Chr2:71580001-71630000	2	71580001	71630000	null			Not found	0	0.581161	0.380805	0.366726	0.305911	0.341769	0.302336
Chr2:71660001-71680000	2	71660001	71680000	null			Not found	0	0.645103	0.420507	0.467464	0.350618	0.404837	0.274611
Chr2:71730001-71740000	2	71730001	71740000	Gm1631	ENSMUSG00000064263	predicted gene 1631 [Source:MGI Symbol;Acc:MGI:2686477]	overlapping	0	0.572504	0.348572	0.285639	0.278617	0.442244	0.347058
Chr2:71780001-71790000	2	71780001	71790000	Itga6	ENSMUSG00000027111	integrin alpha 6 [Source:MGI Symbol;Acc:MGI:96605]	overlapping	0	0.598087	0.495881	0.352833	0.197848	0.29716	0.18426
Chr2:71860001-71870000	2	71860001	71870000	Itga6	ENSMUSG00000027111	integrin alpha 6 [Source:MGI Symbol;Acc:MGI:96605]	upstream	1585	0.621456	0.384245	0.412942	0.287385	0.333518	0.180684
Chr2:71990001-72000000	2	71990001	72000000	Rapgef4	ENSMUSG00000049044	Rap guanine nucleotide exchange factor (GEF) 4 [Source:MGI Symbol;Acc:MGI:1917723]	overlapping	0	0.60583	0.438296	0.515621	0.575389	0.389105	0.298766
Chr2:72110001-72140000	2	72110001	72140000	Rapgef4	ENSMUSG00000049044	Rap guanine nucleotide exchange factor (GEF) 4 [Source:MGI Symbol;Acc:MGI:1917723]	overlapping	0	0.627495	0.351683	0.488621	0.299901	0.378617	0.401318
Chr2:72170001-72180000	2	72170001	72180000	Rapgef4	ENSMUSG00000049044	Rap guanine nucleotide exchange factor (GEF) 4 [Source:MGI Symbol;Acc:MGI:1917723]	overlapping	0	0.601959	0.60516	0.439838	0.34185	0.546075	0.409696
Chr2:72370001-72380000	2	72370001	72380000	B230120H23Rik	ENSMUSG00000004085	RIKEN cDNA B230120H23 gene [Source:MGI Symbol;Acc:MGI:2443258]	overlapping	0	0.627402	0.514353	0.518983	0.224771	0.526847	0.574259
Chr2:72410001-72420000	2	72410001	72420000	B230120H23Rik	ENSMUSG00000004085	RIKEN cDNA B230120H23 gene [Source:MGI Symbol;Acc:MGI:2443258]	overlapping	0	0.582322	0.585604	0.577236	0.242308	0.669484	0.284455
Chr2:72440001-72450000	2	72440001	72450000	B230120H23Rik	ENSMUSG00000004085	RIKEN cDNA B230120H23 gene [Source:MGI Symbol;Acc:MGI:2443258]	overlapping	0	0.647039	0.473968	0.443939	0.224771	0.471261	0.280888
Chr2:72500001-72510000	2	72500001	72510000	null			Not found	0	0.58813	0.421096	0.387561	0.224771	0.29716	0.363152
Chr2:72550001-72560000	2	72550001	72560000	null			Not found	0	0.568493	0.441736	0.439081	0.34185	0.275485	0.313068
Chr2:72650001-72660000	2	72650001	72660000	null			Not found	0	0.572365	0.321052	0.493602	0.261081	0.309396	0.407877
Chr2:72840001-72870000	2	72840001	72870000	null			Not found	0	0.562454	0.442584	0.438092	0.312004	0.393883	0.215278
Chr2:72980001-72990000	2	72980001	72990000	Sp3	ENSMUSG00000027109	trans-acting transcription factor 3 [Source:MGI Symbol;Acc:MGI:1277166]	overlapping	0	0.596291	0.376187	0.436845	0.324314	0.413227	0.20574
Chr2:73060001-73070000	2	73060001	73070000	null			Not found	0	0.686311	0.362427	0.388309	0.368773	0.381763	0.382849
Chr2:73220001-73230000	2	73220001	73230000	Ola1	ENSMUSG00000027108	Obg-like ATPase 1 [Source:MGI Symbol;Acc:MGI:1914309]	downstream	1077	0.615927	0.342871	0.530565	0.260462	0.386658	0.227202
Chr2:73390001-73400000	2	73390001	73400000	D230022J07Rik	ENSMUSG00000087176	RIKEN cDNA D230022J07 gene [Source:MGI Symbol;Acc:MGI:2444095]	overlapping	0	0.670825	0.548753	0.448418	0.423238	0.430357	0.202164
Chr2:73420001-73430000	2	73420001	73430000	D230022J07Rik	ENSMUSG00000087176	RIKEN cDNA D230022J07 gene [Source:MGI Symbol;Acc:MGI:2444095]	overlapping	0	0.594216	0.43839	0.465598	0.45831	0.248915	0.481233
Chr2:73500001-73530000	2	73500001	73530000	Wipf1	ENSMUSG00000075284	WAS/WASL interacting protein family, member 1 [Source:MGI Symbol;Acc:MGI:2178801]	overlapping	0	0.592141	0.434133	0.42776	0.263797	0.373722	0.338117
Chr2:73570001-73610000	2	73570001	73610000	Chrna1	ENSMUSG00000027107	cholinergic receptor, nicotinic, alpha polypeptide 1 (muscle) [Source:MGI Symbol;Acc:MGI:87885]	overlapping	0	0.616237	0.430285	0.454584	0.270004	0.338937	0.324251
Chr2:73920001-73930000	2	73920001	73930000	null			Not found	0	0.617724	0.462564	0.536541	1.05124	0.691159	0.327361
Chr2:74140001-74150000	2	74140001	74150000	Gm13667	ENSMUSG00000084791	predicted gene 13667 [Source:MGI Symbol;Acc:MGI:3650879]	overlapping	0	0.576236	0.417656	0.461118	0.296772	0.43735	0.418622
Chr2:74230001-74240000	2	74230001	74240000	null			Not found	0	0.597948	0.380805	0.335293	0.350618	0.311843	0.452602
Chr2:74690001-74700000	2	74690001	74700000	Gm20440	ENSMUSG00000092315	predicted gene 20440 [Source:MGI Symbol;Acc:MGI:5141905]	overlapping	0	0.654921	0.413037	0.381964	0.125847	0.389105	0.286229
Chr2:74720001-74760000	2	74720001	74760000	Hoxd3	ENSMUSG00000079277	homeobox D3 [Source:MGI Symbol;Acc:MGI:96207]	overlapping	0	0.60794	0.417314	0.434232	0.245118	0.357029	0.352425
Chr2:74960001-74970000	2	74960001	74970000	null			Not found	0	0.58799	0.401539	0.425642	0.504007	0.193329	0.300531
Chr2:74990001-75010000	2	74990001	75010000	null			Not found	0	0.612675	0.317518	0.454394	0.179693	0.333518	0.243296
Chr2:75110001-75120000	2	75110001	75120000	null			Not found	0	0.70443	0.456674	0.382333	0.306159	0.355194	0.465112
Chr2:75490001-75500000	2	75490001	75500000	null			Not found	0	0.629756	0.537349	0.482389	0.485233	0.386658	0.180693
Chr2:75700001-75710000	2	75700001	75710000	Nfe2l2	ENSMUSG00000015839	nuclear factor, erythroid derived 2, like 2 [Source:MGI Symbol;Acc:MGI:108420]	overlapping	0	0.78104	0.449888	0.402117	0.341232	0.415674	0.359585
Chr2:75750001-75760000	2	75750001	75760000	null			Not found	0	0.584398	0.321052	0.391671	0.34185	0.43735	0.373887
Chr2:75810001-75820000	2	75810001	75820000	null			Not found	0	0.590205	0.339431	0.469329	0.314308	0.415674	0.350642
Chr2:75930001-75960000	2	75930001	75960000	Agps	ENSMUSG00000042410	alkylglycerone phosphate synthase [Source:MGI Symbol;Acc:MGI:2443065]	overlapping	0	0.562547	0.425682	0.445808	0.302824	0.422899	0.251051
Chr2:75990001-76010000	2	75990001	76010000	Pde11a	ENSMUSG00000075270	phosphodiesterase 11A [Source:MGI Symbol;Acc:MGI:3036251]	overlapping	0	0.650012	0.443008	0.440212	0.211619	0.409557	0.361378
Chr2:76050001-76060000	2	76050001	76060000	Pde11a	ENSMUSG00000075270	phosphodiesterase 11A [Source:MGI Symbol;Acc:MGI:3036251]	overlapping	0	0.593937	0.411859	0.529817	0.350618	0.302054	0.4025
Chr2:76100001-76110000	2	76100001	76110000	Pde11a	ENSMUSG00000075270	phosphodiesterase 11A [Source:MGI Symbol;Acc:MGI:3036251]	overlapping	0	0.595733	0.426892	0.459253	0.197848	0.466366	0.271927
Chr2:76340001-76350000	2	76340001	76350000	Pde11a	ENSMUSG00000075270	phosphodiesterase 11A [Source:MGI Symbol;Acc:MGI:3036251]	downstream	1227	0.61952	0.395743	0.46896	0.593544	0.304502	0.334521
Chr2:76430001-76450000	2	76430001	76450000	Osbpl6	ENSMUSG00000042359	oxysterol binding protein-like 6 [Source:MGI Symbol;Acc:MGI:2139014]	overlapping	0	0.681611	0.415888	0.47736	0.26954	0.40239	0.34169
Chr2:76490001-76520000	2	76490001	76520000	Osbpl6	ENSMUSG00000042359	oxysterol binding protein-like 6 [Source:MGI Symbol;Acc:MGI:2139014]	overlapping	0	0.531802	0.437149	0.40785	0.329747	0.331887	0.276682
Chr2:76550001-76560000	2	76550001	76560000	Osbpl6	ENSMUSG00000042359	oxysterol binding protein-like 6 [Source:MGI Symbol;Acc:MGI:2139014]	overlapping	0	0.612056	0.438296	0.507789	0.224771	0.5244	0.397169
Chr2:76620001-76630000	2	76620001	76630000	Prkra	ENSMUSG00000002731	protein kinase, interferon inducible double stranded RNA dependent activator [Source:MGI Symbol;Acc:MGI:1344375]	overlapping	0	0.611777	0.502855	0.639571	1.08755	0.703395	0.354191
Chr2:76700001-76710000	2	76700001	76710000	Ttn	ENSMUSG00000051747	titin [Source:MGI Symbol;Acc:MGI:98864]	overlapping	0	0.592141	0.477502	0.483895	0.827702	0.526847	0.37568
Chr2:77230001-77240000	2	77230001	77240000	Sestd1	ENSMUSG00000042272	SEC14 and spectrin domains 1 [Source:MGI Symbol;Acc:MGI:1916262]	overlapping	0	0.590065	0.409597	0.552963	0.629854	0.439797	0.339889
Chr2:77270001-77280000	2	77270001	77280000	Sestd1	ENSMUSG00000042272	SEC14 and spectrin domains 1 [Source:MGI Symbol;Acc:MGI:1916262]	overlapping	0	0.643307	0.516615	0.37935	0.413851	0.299607	0.270135
Chr2:77370001-77380000	2	77370001	77380000	null			Not found	0	0.582322	0.402717	0.457378	0.485852	0.326177	0.286229
Chr2:77430001-77440000	2	77430001	77440000	Zfp385b	ENSMUSG00000027016	zinc finger protein 385B [Source:MGI Symbol;Acc:MGI:2444734]	overlapping	0	0.601959	0.492346	0.396899	0.314927	0.418121	0.47229
Chr2:77790001-77800000	2	77790001	77800000	Zfp385b	ENSMUSG00000027016	zinc finger protein 385B [Source:MGI Symbol;Acc:MGI:2444734]	overlapping	0	0.598087	0.379627	0.419297	0.449542	0.495383	0.372095
Chr2:77860001-77870000	2	77860001	77870000	null			Not found	0	0.611777	0.311816	0.55409	0.278617	0.391552	0.574241
Chr2:78590001-78600000	2	78590001	78600000	null			Not found	0	0.617724	0.411859	0.485391	0.549085	0.364982	0.295172
Chr2:79600001-79610000	2	79600001	79610000	null			Not found	0	0.570429	0.373925	0.457756	0.350618	0.248915	0.320237
Chr2:80070001-80080000	2	80070001	80080000	Pde1a	ENSMUSG00000059173	phosphodiesterase 1A, calmodulin-dependent [Source:MGI Symbol;Acc:MGI:1201792]	overlapping	0	0.596012	0.349751	0.52011	0.37816	0.306949	0.239739
Chr2:80170001-80180000	2	80170001	80180000	null			Not found	0	0.599884	0.379627	0.624276	0.332463	0.478602	0.425764
Chr2:80270001-80280000	2	80270001	80280000	null			Not found	0	0.66889	0.456768	0.491358	0.179693	0.302054	0.241513
Chr2:80370001-80390000	2	80370001	80390000	null			Not found	0	0.627542	0.429154	0.459991	0.134615	0.192105	0.237924
Chr2:80440001-80450000	2	80440001	80450000	Frzb	ENSMUSG00000027004	frizzled-related protein [Source:MGI Symbol;Acc:MGI:892032]	overlapping	0	0.670825	0.447532	0.437594	0.521543	0.468814	0.239721
Chr2:80700001-80710000	2	80700001	80710000	SNORA17	ENSMUSG00000077404	Small nucleolar RNA SNORA17 [Source:RFAM;Acc:RF00560]	overlapping	0	0.60583	0.417656	0.483516	0.170925	0.32373	0.336313
Chr2:81690001-81700000	2	81690001	81700000	null			Not found	0	0.584119	0.256587	0.561174	0.602931	0.55097	0.436517
Chr2:83680001-83700000	2	83680001	83700000	Gm13686	ENSMUSG00000085450	predicted gene 13686 [Source:MGI Symbol;Acc:MGI:3651825]	upstream	657	0.59698	0.517746	0.51618	0.91693	0.601836	0.389991
Chr2:83900001-83910000	2	83900001	83910000	null			Not found	0	0.578312	0.380805	0.441325	1.26848	0.775762	0.352434
Chr2:84100001-84110000	2	84100001	84110000	null			Not found	0	0.570429	0.334812	0.468951	0.242926	0.389105	0.379264
Chr2:84220001-84230000	2	84220001	84230000	null			Not found	0	0.592001	0.333634	0.544383	0.323695	0.357641	0.416829
Chr2:84510001-84530000	2	84510001	84530000	Gm13710	ENSMUSG00000087362	predicted gene 13710 [Source:MGI Symbol;Acc:MGI:3650894]	overlapping	0	0.592141	0.554549	0.481281	0.404774	0.468814	0.256715
Chr2:84730001-84890000	2	84730001	84890000	Ypel4	ENSMUSG00000034059	yippee-like 4 (Drosophila) [Source:MGI Symbol;Acc:MGI:3605071]	overlapping	0	0.660808	0.52153	0.532592	0.36036	0.405383	0.378924
Chr2:84930001-84950000	2	84930001	84950000	Slc43a3	ENSMUSG00000027074	solute carrier family 43, member 3 [Source:MGI Symbol;Acc:MGI:1931054]	overlapping	0	0.633349	0.502761	0.466341	1.09755	0.593271	0.345261
Chr2:84990001-85070000	2	84990001	85070000	Prg3	ENSMUSG00000027072	proteoglycan 3 [Source:MGI Symbol;Acc:MGI:1858200]	overlapping	0	0.733917	0.545472	0.500739	0.575544	0.5133	0.377699
Chr2:85090001-85170000	2	85090001	85170000	Aplnr	ENSMUSG00000044338	apelin receptor [Source:MGI Symbol;Acc:MGI:1346086]	overlapping	0	0.628804	0.490414	0.50886	0.391157	0.426206	0.257391
Chr2:85190001-85240000	2	85190001	85240000	Gm13713	ENSMUSG00000085135	predicted gene 13713 [Source:MGI Symbol;Acc:MGI:3650490]	overlapping	0	0.61493	0.530356	0.563121	0.521914	0.414696	0.35708
Chr2:85420001-85430000	2	85420001	85430000	SNORA48	ENSMUSG00000087973	Small nucleolar RNA SNORA48 [Source:RFAM;Acc:RF00554]	overlapping	0	0.63722	0.437212	0.536532	0.323695	0.415674	0.422188
Chr2:87480001-87490000	2	87480001	87490000	Pramel7	ENSMUSG00000025839	preferentially expressed antigen in melanoma like 7 [Source:MGI Symbol;Acc:MGI:2156391]	overlapping	0	0.609562	0.392303	0.680654	0.144002	0.41078	0.486583
Chr2:89960001-89970000	2	89960001	89970000	null			Not found	0	0.591862	0.464826	0.431996	0.422619	0.413227	0.586778
Chr2:90480001-90510000	2	90480001	90510000	Ptprj	ENSMUSG00000025314	protein tyrosine phosphatase, receptor type, J [Source:MGI Symbol;Acc:MGI:104574]	overlapping	0	0.637313	0.536532	0.477297	0.30554	0.498646	0.264173
Chr2:90530001-90590000	2	90530001	90590000	Ptprj	ENSMUSG00000025314	protein tyrosine phosphatase, receptor type, J [Source:MGI Symbol;Acc:MGI:104574]	overlapping	0	0.639595	0.558398	0.474432	0.370441	0.430591	0.285342
Chr2:90630001-90660000	2	90630001	90660000	null			Not found	0	0.595966	0.568011	0.480902	0.209951	0.412412	0.317841
Chr2:90880001-90890000	2	90880001	90890000	C1qtnf4	ENSMUSG00000040794	C1q and tumor necrosis factor related protein 4 [Source:MGI Symbol;Acc:MGI:1914695]	overlapping	0	0.741767	0.538433	0.504418	0.468315	0.447138	0.298757
Chr2:90920001-90940000	2	90920001	90940000	Celf1	ENSMUSG00000005506	CUGBP, Elav-like family member 1 [Source:MGI Symbol;Acc:MGI:1342295]	downstream	382	0.636253	0.426798	0.460555	0.288004	0.29244	0.325587
Chr2:91030001-91140000	2	91030001	91140000	Rapsn	ENSMUSG00000002104	receptor-associated protein of the synapse [Source:MGI Symbol;Acc:MGI:99422]	overlapping	0	0.738346	0.542944	0.466407	0.448342	0.405377	0.322016
Chr2:91170001-91210000	2	91170001	91210000	Madd	ENSMUSG00000040687	MAP-kinase activating death domain [Source:MGI Symbol;Acc:MGI:2444672]	overlapping	0	0.61717	0.454188	0.372252	0.406966	0.413227	0.347051
Chr2:91250001-91330000	2	91250001	91330000	Pacsin3	ENSMUSG00000027257	protein kinase C and casein kinase substrate in neurons 3 [Source:MGI Symbol;Acc:MGI:1891410]	overlapping	0	0.624828	0.512833	0.400814	0.438582	0.380015	0.276613
Chr2:91350001-91360000	2	91350001	91360000	1110051M20Rik	ENSMUSG00000040591	RIKEN cDNA 1110051M20 gene [Source:MGI Symbol;Acc:MGI:1915079]	overlapping	0	0.643167	0.472884	0.388688	0.288004	0.488042	0.343473
Chr2:91450001-91520000	2	91450001	91520000	Lrp4	ENSMUSG00000027253	low density lipoprotein receptor-related protein 4 [Source:MGI Symbol;Acc:MGI:2442252]	overlapping	0	0.637853	0.51166	0.409588	0.292926	0.336565	0.302332
Chr2:91620001-91680000	2	91620001	91680000	Ckap5	ENSMUSG00000040549	cytoskeleton associated protein 5 [Source:MGI Symbol;Acc:MGI:1923036]	overlapping	0	0.655729	0.563542	0.36821	0.441083	0.471261	0.322014
Chr2:91710001-91720000	2	91710001	91720000	Atg13	ENSMUSG00000027244	ATG13 autophagy related 13 homolog (S. cerevisiae) [Source:MGI Symbol;Acc:MGI:1196429]	overlapping	0	0.578172	0.433772	0.374492	0.440774	0.309396	0.259399
Chr2:91910001-92090000	2	91910001	92090000	Ambra1	ENSMUSG00000040506	autophagy/beclin 1 regulator 1 [Source:MGI Symbol;Acc:MGI:2443564]	overlapping	0	0.723788	0.537145	0.473768	0.37785	0.39565	0.356302
Chr2:92120001-92130000	2	92120001	92130000	Phf21a	ENSMUSG00000058318	PHD finger protein 21A [Source:MGI Symbol;Acc:MGI:2384756]	overlapping	0	0.641092	0.688003	0.594037	0.360005	0.246468	0.602872
Chr2:92150001-92160000	2	92150001	92160000	Phf21a	ENSMUSG00000058318	PHD finger protein 21A [Source:MGI Symbol;Acc:MGI:2384756]	overlapping	0	0.627263	0.46935	0.515252	0.323695	0.555864	0.466922
Chr2:92360001-92550000	2	92360001	92550000	Phf21a	ENSMUSG00000058318	PHD finger protein 21A [Source:MGI Symbol;Acc:MGI:2384756]	overlapping	0	0.688176	0.527106	0.486996	0.411478	0.411222	0.425487
Chr2:92570001-92850000	2	92570001	92850000	Chst1	ENSMUSG00000027221	carbohydrate (keratan sulfate Gal-6) sulfotransferase 1 [Source:MGI Symbol;Acc:MGI:1924219]	overlapping	0	0.68696	0.552967	0.553179	0.491912	0.47447	0.426731
Chr2:92870001-93700000	2	92870001	93700000	Gm13791	ENSMUSG00000086980	predicted gene 13791 [Source:MGI Symbol;Acc:MGI:3650954]	overlapping	0	0.744363	0.556765	0.558911	0.467108	0.467727	0.408312
Chr2:93720001-93740000	2	93720001	93740000	Ext2	ENSMUSG00000027198	exostoses (multiple) 2 [Source:MGI Symbol;Acc:MGI:108050]	overlapping	0	0.580456	0.45559	0.397638	0.647699	0.727517	0.532205
Chr2:93770001-93810000	2	93770001	93810000	Ext2	ENSMUSG00000027198	exostoses (multiple) 2 [Source:MGI Symbol;Acc:MGI:108050]	overlapping	0	0.6394	0.538704	0.35069	0.314927	0.453781	0.459314
Chr2:93830001-93980000	2	93830001	93980000	Accs	ENSMUSG00000040272	1-aminocyclopropane-1-carboxylate synthase homolog (Arabidopsis)(non-functional) [Source:MGI Symbol;Acc:MGI:1919717]	overlapping	0	0.680395	0.509069	0.484238	0.462897	0.493309	0.28802
Chr2:94000001-94010000	2	94000001	94010000	Alkbh3	ENSMUSG00000040174	alkB, alkylation repair homolog 3 (E. coli) [Source:MGI Symbol;Acc:MGI:1916363]	overlapping	0	0.586473	0.579808	0.346118	0.449542	0.304502	0.384623
Chr2:94040001-94050000	2	94040001	94050000	Hsd17b12	ENSMUSG00000027195	hydroxysteroid (17-beta) dehydrogenase 12 [Source:MGI Symbol;Acc:MGI:1926967]	overlapping	0	0.566558	0.515437	0.338277	0.368773	0.415674	0.559948
Chr2:94150001-94160000	2	94150001	94160000	Hsd17b12	ENSMUSG00000027195	hydroxysteroid (17-beta) dehydrogenase 12 [Source:MGI Symbol;Acc:MGI:1926967]	overlapping	0	0.609981	0.532637	0.465219	0.188461	0.369877	0.305917
Chr2:94240001-94300000	2	94240001	94300000	Mir129-2	ENSMUSG00000065511	microRNA 129-2 [Source:MGI Symbol;Acc:MGI:3618711]	overlapping	0	0.63441	0.499093	0.479783	0.313156	0.417655	0.399228
Chr2:94440001-94470000	2	94440001	94470000	Api5	ENSMUSG00000027193	apoptosis inhibitor 5 [Source:MGI Symbol;Acc:MGI:1888993]	downstream	1865	0.495569	0.443731	0.467464	0.602518	0.518806	0.496136
Chr2:94740001-94750000	2	94740001	94750000	null			Not found	0	0.639296	0.454412	0.608593	0.288004	0.335965	0.60108
Chr2:101360001-101390000	2	101360001	101390000	null			Not found	0	0.533645	0.493917	0.518743	0.332669	0.331887	0.306514
Chr2:101450001-101470000	2	101450001	101470000	null			Not found	0	0.610739	0.460208	0.520484	0.440774	0.391552	0.474961
Chr2:101640001-101650000	2	101640001	101650000	B230118H07Rik	ENSMUSG00000027165	RIKEN cDNA B230118H07 gene [Source:MGI Symbol;Acc:MGI:1915420]	overlapping	0	0.592141	0.418739	0.479037	0.242926	0.386658	0.465121
Chr2:101710001-101740000	2	101710001	101740000	Prr5l	ENSMUSG00000032841	proline rich 5 like [Source:MGI Symbol;Acc:MGI:1919696]	overlapping	0	0.594675	0.517369	0.364039	0.326824	0.395514	0.496139
Chr2:101770001-101800000	2	101770001	101800000	Prr5l	ENSMUSG00000032841	proline rich 5 like [Source:MGI Symbol;Acc:MGI:1919696]	overlapping	0	0.569185	0.595201	0.473184	0.536981	0.49783	0.443062
Chr2:101840001-101930000	2	101840001	101930000	Prr5l	ENSMUSG00000032841	proline rich 5 like [Source:MGI Symbol;Acc:MGI:1919696]	overlapping	0	0.626451	0.46225	0.517744	0.325918	0.430668	0.327574
Chr2:101950001-101980000	2	101950001	101980000	Ldlrad3	ENSMUSG00000048058	low density lipoprotein receptor class A domain containing 3 [Source:MGI Symbol;Acc:MGI:2138856]	overlapping	0	0.599238	0.564869	0.470447	0.362928	0.36976	0.351228
Chr2:102000001-102160000	2	102000001	102160000	Ldlrad3	ENSMUSG00000048058	low density lipoprotein receptor class A domain containing 3 [Source:MGI Symbol;Acc:MGI:2138856]	overlapping	0	0.609089	0.483425	0.53096	0.345254	0.401931	0.440304
Chr2:102190001-102230000	2	102190001	102230000	null			Not found	0	0.574889	0.391467	0.471474	0.463313	0.432543	0.388207
Chr2:102260001-102290000	2	102260001	102290000	null			Not found	0	0.623624	0.447532	0.491111	0.269849	0.347969	0.372101
Chr2:102450001-102470000	2	102450001	102470000	Fjx1	ENSMUSG00000075012	four jointed box 1 (Drosophila) [Source:MGI Symbol;Acc:MGI:1341907]	overlapping	0	0.642339	0.513128	0.516369	0.242617	0.395048	0.406098
Chr2:102540001-102560000	2	102540001	102560000	Pamr1	ENSMUSG00000027188	peptidase domain containing associated with muscle regeneration 1 [Source:MGI Symbol;Acc:MGI:2445082]	overlapping	0	0.593178	0.49303	0.559498	0.521852	0.396272	0.492856
Chr2:102580001-102600000	2	102580001	102600000	Pamr1	ENSMUSG00000027188	peptidase domain containing associated with muscle regeneration 1 [Source:MGI Symbol;Acc:MGI:2445082]	overlapping	0	0.644065	0.500452	0.518794	0.278617	0.37582	0.516119
Chr2:102690001-102710000	2	102690001	102710000	Slc1a2	ENSMUSG00000005089	solute carrier family 1 (glial high affinity glutamate transporter), member 2 [Source:MGI Symbol;Acc:MGI:101931]	overlapping	0	0.584258	0.520597	0.561183	0.576008	0.521953	0.604669
Chr2:102730001-102740000	2	102730001	102740000	Slc1a2	ENSMUSG00000005089	solute carrier family 1 (glial high affinity glutamate transporter), member 2 [Source:MGI Symbol;Acc:MGI:101931]	overlapping	0	0.676772	0.490084	0.612712	0.215384	0.420569	0.608231
Chr2:102890001-102900000	2	102890001	102900000	Cd44	ENSMUSG00000005087	CD44 antigen [Source:MGI Symbol;Acc:MGI:88338]	overlapping	0	0.761403	0.460208	0.490988	0.234158	0.471261	0.493761
Chr2:102980001-102990000	2	102980001	102990000	null			Not found	0	0.580526	0.422179	0.532052	0.593544	0.669484	0.531317
Chr2:103210001-103220000	2	103210001	103220000	Gm13869	ENSMUSG00000086957	predicted gene 13869 [Source:MGI Symbol;Acc:MGI:3650539]	overlapping	0	0.570429	0.490084	0.55446	0.395696	0.333518	0.543845
Chr2:103280001-103490000	2	103280001	103490000	Ehf	ENSMUSG00000012350	ets homologous factor [Source:MGI Symbol;Acc:MGI:1270840]	overlapping	0	0.580906	0.492737	0.482574	0.306311	0.387706	0.35694
Chr2:103510001-103520000	2	103510001	103520000	null			Not found	0	0.596152	0.499226	0.516748	0.432006	0.488042	0.341681
Chr2:103550001-103570000	2	103550001	103570000	Abtb2	ENSMUSG00000032724	ankyrin repeat and BTB (POZ) domain containing 2 [Source:MGI Symbol;Acc:MGI:2139365]	overlapping	0	0.619729	0.538433	0.38177	0.396005	0.360088	0.238833
Chr2:103600001-103610000	2	103600001	103610000	Abtb2	ENSMUSG00000032724	ankyrin repeat and BTB (POZ) domain containing 2 [Source:MGI Symbol;Acc:MGI:2139365]	overlapping	0	0.580108	0.603982	0.406976	0.693087	0.526847	0.438309
Chr2:103630001-103640000	2	103630001	103640000	Abtb2	ENSMUSG00000032724	ankyrin repeat and BTB (POZ) domain containing 2 [Source:MGI Symbol;Acc:MGI:2139365]	overlapping	0	0.652985	0.471706	0.402865	0.656777	0.488042	0.39716
Chr2:103660001-103760000	2	103660001	103760000	Abtb2	ENSMUSG00000032724	ankyrin repeat and BTB (POZ) domain containing 2 [Source:MGI Symbol;Acc:MGI:2139365]	overlapping	0	0.648381	0.518533	0.411042	0.453359	0.455319	0.403765
Chr2:103840001-103850000	2	103840001	103850000	AL928544.1	ENSMUSG00000076233	No description	overlapping	0	0.684654	0.517793	0.48613	0.656158	0.642914	0.323794
Chr2:103880001-103960000	2	103880001	103960000	Gm13881	ENSMUSG00000084756	predicted gene 13881 [Source:MGI Symbol;Acc:MGI:3649536]	overlapping	0	0.614922	0.525339	0.545683	0.328157	0.414189	0.284894
Chr2:104000001-104010000	2	104000001	104010000	4931422A03Rik	ENSMUSG00000046085	RIKEN cDNA 4931422A03 gene [Source:MGI Symbol;Acc:MGI:1918236]	overlapping	0	0.580387	0.453328	0.415935	0.242926	0.311843	0.279069
Chr2:104060001-104070000	2	104060001	104070000	Fbxo3	ENSMUSG00000027180	F-box protein 3 [Source:MGI Symbol;Acc:MGI:1929084]	overlapping	0	0.68244	0.616658	0.468212	0.440774	0.277932	0.262984
Chr2:104100001-104130000	2	104100001	104130000	Cd59a	ENSMUSG00000032679	CD59a antigen [Source:MGI Symbol;Acc:MGI:109177]	overlapping	0	0.628233	0.410351	0.447547	0.185745	0.265813	0.237934
Chr2:104150001-104260000	2	104150001	104260000	D430041D05Rik	ENSMUSG00000068373	RIKEN cDNA D430041D05 gene [Source:MGI Symbol;Acc:MGI:2181743]	overlapping	0	0.617472	0.495246	0.563216	0.388353	0.392601	0.47131
Chr2:104350001-104360000	2	104350001	104360000	D430041D05Rik	ENSMUSG00000068373	RIKEN cDNA D430041D05 gene [Source:MGI Symbol;Acc:MGI:2181743]	overlapping	0	0.627263	0.592484	0.59254	0.477084	0.335965	0.474064
Chr2:104390001-104420000	2	104390001	104420000	D430041D05Rik	ENSMUSG00000068373	RIKEN cDNA D430041D05 gene [Source:MGI Symbol;Acc:MGI:2181743]	overlapping	0	0.625559	0.476293	0.481906	0.269849	0.547007	0.357199
Chr2:104540001-104580000	2	104540001	104580000	4930500J02Rik	ENSMUSG00000086454	RIKEN cDNA 4930500J02 gene [Source:MGI Symbol;Acc:MGI:1922209]	overlapping	0	0.555737	0.419352	0.446086	0.434043	0.40842	0.261194
Chr2:104670001-104690000	2	104670001	104690000	Tcp11l1	ENSMUSG00000027175	t-complex 11 like 1 [Source:MGI Symbol;Acc:MGI:2444263]	overlapping	0	0.733606	0.46591	0.407904	0.360005	0.397495	0.304125
Chr2:105030001-105060000	2	105030001	105060000	null			Not found	0	0.530511	0.521563	0.489366	0.279029	0.516359	0.389988
Chr2:105120001-105140000	2	105120001	105140000	AI314831	ENSMUSG00000074987	expressed sequence AI314831 [Source:MGI Symbol;Acc:MGI:2138884]	overlapping	0	0.608943	0.45559	0.382333	0.333082	0.341909	0.402514
Chr2:105160001-105180000	2	105160001	105180000	Wt1	ENSMUSG00000016458	Wilms tumor 1 homolog [Source:MGI Symbol;Acc:MGI:98968]	overlapping	0	0.603825	0.506248	0.535604	0.382235	0.450809	0.407886
Chr2:105300001-105330000	2	105300001	105330000	0610012H03Rik	ENSMUSG00000055312	RIKEN cDNA 0610012H03 gene [Source:MGI Symbol;Acc:MGI:1921338]	overlapping	0	0.607905	0.521202	0.518614	0.620879	0.496315	0.38522
Chr2:105350001-105430000	2	105350001	105430000	0610012H03Rik	ENSMUSG00000055312	RIKEN cDNA 0610012H03 gene [Source:MGI Symbol;Acc:MGI:1921338]	overlapping	0	0.601682	0.509222	0.511708	0.413774	0.35314	0.301664
Chr2:105480001-105490000	2	105480001	105490000	null			Not found	0	0.57444	0.47279	0.501822	0.125847	0.164312	0.384623
Chr2:105510001-105530000	2	105510001	105530000	null			Not found	0	0.667852	0.495881	0.610837	0.6837	0.509892	0.354213
Chr2:105570001-105580000	2	105570001	105580000	Pax6os1	ENSMUSG00000086029	Pax6 opposite strand transcript 1 [Source:MGI Symbol;Acc:MGI:3028033]	overlapping	0	0.566558	0.446354	0.561922	0.953549	0.616345	0.441876
Chr2:105600001-105620000	2	105600001	105620000	Pax6os1	ENSMUSG00000086029	Pax6 opposite strand transcript 1 [Source:MGI Symbol;Acc:MGI:3028033]	overlapping	0	0.624499	0.454459	0.519173	0.391003	0.265871	0.370312
Chr2:105660001-105690000	2	105660001	105690000	Pax6os1	ENSMUSG00000086029	Pax6 opposite strand transcript 1 [Source:MGI Symbol;Acc:MGI:3028033]	overlapping	0	0.644551	0.468596	0.408216	0.330159	0.330256	0.328568
Chr2:106460001-106470000	2	106460001	106470000	Gm14015	ENSMUSG00000087226	predicted gene 14015 [Source:MGI Symbol;Acc:MGI:3649269]	overlapping	0	0.639156	0.518877	0.618679	0.37816	0.386658	0.368529
Chr2:106530001-106540000	2	106530001	106540000	null			Not found	0	0.621456	0.356631	0.645187	0.288004	0.217451	0.323812
Chr2:106740001-106750000	2	106740001	106750000	Mpped2	ENSMUSG00000016386	metallophosphoesterase domain containing 2 [Source:MGI Symbol;Acc:MGI:1924265]	overlapping	0	0.572365	0.457852	0.462236	0.233539	0.306949	0.221825
Chr2:106770001-106780000	2	106770001	106780000	Mpped2	ENSMUSG00000016386	metallophosphoesterase domain containing 2 [Source:MGI Symbol;Acc:MGI:1924265]	overlapping	0	0.570569	0.43839	0.51152	0.251694	0.488042	0.420396
Chr2:106810001-106860000	2	106810001	106860000	Mpped2	ENSMUSG00000016386	metallophosphoesterase domain containing 2 [Source:MGI Symbol;Acc:MGI:1924265]	overlapping	0	0.597616	0.441594	0.468877	0.332958	0.295342	0.280867
Chr2:106930001-106960000	2	106930001	106960000	null			Not found	0	0.543556	0.506201	0.392539	0.173848	0.350416	0.320228
Chr2:107290001-107300000	2	107290001	107300000	Kcna4	ENSMUSG00000042604	potassium voltage-gated channel, shaker-related subfamily, member 4 [Source:MGI Symbol;Acc:MGI:96661]	overlapping	0	0.649114	0.522317	0.472313	0.233539	0.304502	0.352425
Chr2:108070001-108080000	2	108070001	108080000	SNORA17	ENSMUSG00000077411	Small nucleolar RNA SNORA17 [Source:RFAM;Acc:RF00560]	overlapping	0	0.592001	0.494702	0.571251	0.216003	0.248915	0.361378
Chr2:109980001-109990000	2	109980001	109990000	Lgr4	ENSMUSG00000050199	leucine-rich repeat-containing G protein-coupled receptor 4 [Source:MGI Symbol;Acc:MGI:1891468]	overlapping	0	0.580108	0.46148	0.474936	0.269849	0.362535	0.420414
Chr2:110860001-110870000	2	110860001	110870000	Ano3	ENSMUSG00000074968	anoctamin 3 [Source:MGI Symbol;Acc:MGI:3613666]	overlapping	0	0.578451	0.320958	0.487626	0.288004	0.514611	0.316652
Chr2:112240001-112270000	2	112240001	112270000	Lpcat4	ENSMUSG00000027134	lysophosphatidylcholine acyltransferase 4 [Source:MGI Symbol;Acc:MGI:2138993]	overlapping	0	0.648468	0.523432	0.346491	0.308875	0.453548	0.227802
Chr2:112370001-112380000	2	112370001	112380000	RP23-208E23.3	ENSMUSG00000096764	Slc12a6 protein; Solute carrier family 12 member 6 [Source:UniProtKB/TrEMBL;Acc:Q6P6P5]	overlapping	0	0.611637	0.455496	0.321097	0.0450779	0.137742	0.252248
Chr2:113390001-113400000	2	113390001	113400000	Fmn1	ENSMUSG00000044042	formin 1 [Source:MGI Symbol;Acc:MGI:101815]	overlapping	0	0.58813	0.396921	0.48613	0.18908	0.309396	0.282654
Chr2:113750001-113760000	2	113750001	113760000	Grem1	ENSMUSG00000074934	gremlin 1 [Source:MGI Symbol;Acc:MGI:1344337]	overlapping	0	0.621316	0.44527	0.427138	0.15277	0.277932	0.356001
Chr2:113820001-113830000	2	113820001	113830000	Scg5	ENSMUSG00000023236	secretogranin V [Source:MGI Symbol;Acc:MGI:98289]	overlapping	0	0.597948	0.454506	0.382333	0.926626	0.604109	0.350624
Chr2:113930001-113940000	2	113930001	113940000	null			Not found	0	0.570429	0.406157	0.477919	0.296772	0.331071	0.545619
Chr2:114010001-114020000	2	114010001	114020000	Gjd2	ENSMUSG00000068615	gap junction protein, delta 2 [Source:MGI Symbol;Acc:MGI:1334209]	overlapping	0	0.582183	0.476324	0.57574	0.350618	0.304502	0.318436
Chr2:114060001-114070000	2	114060001	114070000	A530058N18Rik	ENSMUSG00000092201	RIKEN cDNA A530058N18 gene [Source:MGI Symbol;Acc:MGI:2444858]	overlapping	0	0.666535	0.334812	0.468212	0.216003	0.302054	0.275503
Chr2:115730001-115760000	2	115730001	115760000	BC052040	ENSMUSG00000040282	cDNA sequence BC052040 [Source:MGI Symbol;Acc:MGI:3026886]	overlapping	0	0.560564	0.424143	0.492854	0.311592	0.305317	0.373302
Chr2:115840001-115850000	2	115840001	115850000	null			Not found	0	0.623391	0.407241	0.511151	0.15277	0.222346	0.41682
Chr2:116540001-116560000	2	116540001	116560000	null			Not found	0	0.701248	0.53504	0.478658	0.265156	0.414451	0.602863
Chr2:116900001-116910000	2	116900001	116910000	D330050G23Rik	ENSMUSG00000085316	RIKEN cDNA D330050G23 gene [Source:MGI Symbol;Acc:MGI:2445155]	overlapping	0	0.686451	0.414216	0.46074	0.773237	0.505172	0.336331
Chr2:116970001-116980000	2	116970001	116980000	U1	ENSMUSG00000065794	U1 spliceosomal RNA [Source:RFAM;Acc:RF00003]	downstream	1828	0.62367	0.251969	0.384578	0.107692	0.273038	0.302341
Chr2:117080001-117100000	2	117080001	117100000	null			Not found	0	0.645033	0.488364	0.580778	0.328698	0.331071	0.432915
Chr2:117290001-117350000	2	117290001	117350000	Rasgrp1	ENSMUSG00000027347	RAS guanyl releasing protein 1 [Source:MGI Symbol;Acc:MGI:1314635]	overlapping	0	0.558998	0.432594	0.518429	0.277156	0.410838	0.476457
Chr2:117570001-117580000	2	117570001	117580000	null			Not found	0	0.588269	0.394659	0.527952	0.386928	0.364982	0.3542
Chr2:117660001-117670000	2	117660001	117670000	null			Not found	0	0.607766	0.373925	0.5455	0.368773	0.331071	0.357784
Chr2:117720001-117730000	2	117720001	117730000	null			Not found	0	0.702215	0.333634	0.550728	0.296772	0.304502	0.359576
Chr2:117860001-117870000	2	117860001	117870000	4930412B13Rik	ENSMUSG00000086221	RIKEN cDNA 4930412B13 gene [Source:MGI Symbol;Acc:MGI:1921188]	overlapping	0	0.629478	0.401539	0.49883	0.323695	0.391552	0.343482
Chr2:117980001-117990000	2	117980001	117990000	Gm13986	ENSMUSG00000087203	predicted gene 13986 [Source:MGI Symbol;Acc:MGI:3651937]	overlapping	0	0.684515	0.490084	0.530565	0.287385	0.190882	0.270126
Chr2:118040001-118080000	2	118040001	118080000	Gm13986	ENSMUSG00000087203	predicted gene 13986 [Source:MGI Symbol;Acc:MGI:3651937]	overlapping	0	0.611777	0.465663	0.580593	0.562082	0.325652	0.433383
Chr2:118110001-118120000	2	118110001	118120000	Gm13986	ENSMUSG00000087203	predicted gene 13986 [Source:MGI Symbol;Acc:MGI:3651937]	overlapping	0	0.662943	0.518877	0.489492	0.377541	0.164312	0.350642
Chr2:118250001-118260000	2	118250001	118260000	Fsip1	ENSMUSG00000027344	fibrous sheath-interacting protein 1 [Source:MGI Symbol;Acc:MGI:1918563]	overlapping	0	0.666954	0.415394	0.505544	0.360005	0.560758	0.270126
Chr2:118300001-118310000	2	118300001	118310000	Gpr176	ENSMUSG00000040133	G protein-coupled receptor 176 [Source:MGI Symbol;Acc:MGI:2685858]	overlapping	0	0.631553	0.334812	0.395403	0.449542	0.415674	0.255824
Chr2:118330001-118340000	2	118330001	118340000	Gpr176	ENSMUSG00000040133	G protein-coupled receptor 176 [Source:MGI Symbol;Acc:MGI:2685858]	overlapping	0	0.596152	0.45559	0.57126	0.413233	0.476155	0.357784
Chr2:118360001-118380000	2	118360001	118380000	Gpr176	ENSMUSG00000040133	G protein-coupled receptor 176 [Source:MGI Symbol;Acc:MGI:2685858]	overlapping	0	0.568563	0.428518	0.457378	0.400389	0.363759	0.397151
Chr2:118480001-118500000	2	118480001	118500000	Srp14	ENSMUSG00000009549	signal recognition particle 14 [Source:MGI Symbol;Acc:MGI:107169]	downstream	290	0.660039	0.465957	0.388498	0.34185	0.289993	0.39358
Chr2:118520001-118550000	2	118520001	118550000	Bmf	ENSMUSG00000040093	BCL2 modifying factor [Source:MGI Symbol;Acc:MGI:2176433]	overlapping	0	0.676772	0.442191	0.458874	0.392773	0.341559	0.381053
Chr2:118570001-118600000	2	118570001	118600000	Bub1b	ENSMUSG00000040084	budding uninhibited by benzimidazoles 1 homolog, beta (S. cerevisiae) [Source:MGI Symbol;Acc:MGI:1333889]	overlapping	0	0.578312	0.484351	0.484511	0.635493	0.498646	0.40072
Chr2:118650001-118800000	2	118650001	118800000	Pak6	ENSMUSG00000074923	p21 protein (Cdc42/Rac)-activated kinase 6 [Source:MGI Symbol;Acc:MGI:2679420]	overlapping	0	0.741443	0.457522	0.455367	0.314177	0.345568	0.345028
Chr2:118830001-118850000	2	118830001	118850000	D2Ertd750e	ENSMUSG00000027331	DNA segment, Chr 2, ERATO Doi 750, expressed [Source:MGI Symbol;Acc:MGI:1289298]	overlapping	0	0.649184	0.464779	0.444687	0.319311	0.472484	0.264758
Chr2:118870001-118950000	2	118870001	118950000	Ivd	ENSMUSG00000027332	isovaleryl coenzyme A dehydrogenase [Source:MGI Symbol;Acc:MGI:1929242]	overlapping	0	0.722458	0.458488	0.420605	0.34733	0.429265	0.336546
Chr2:118980001-119010000	2	118980001	119010000	Gm14089	ENSMUSG00000084802	predicted gene 14089 [Source:MGI Symbol;Acc:MGI:3650468]	overlapping	0	0.627588	0.429546	0.479535	0.6837	0.314174	0.364359
Chr2:119140001-119180000	2	119140001	119180000	Rad51	ENSMUSG00000027323	RAD51 homolog (S. cerevisiae) [Source:MGI Symbol;Acc:MGI:97890]	overlapping	0	0.630929	0.516862	0.300849	0.323695	0.393912	0.284892
Chr2:119210001-119270000	2	119210001	119270000	Zfyve19	ENSMUSG00000068580	zinc finger, FYVE domain containing 19 [Source:MGI Symbol;Acc:MGI:1919258]	overlapping	0	0.572734	0.41438	0.469205	0.571108	0.48338	0.345866
Chr2:119290001-119370000	2	119290001	119370000	Vps18	ENSMUSG00000034216	vacuolar protein sorting 18 (yeast) [Source:MGI Symbol;Acc:MGI:2443626]	overlapping	0	0.628752	0.43376	0.398853	0.466678	0.461647	0.306806
Chr2:119490001-119500000	2	119490001	119500000	null			Not found	0	0.625467	0.413037	0.317366	0.360005	0.188435	0.355983
Chr2:119650001-119660000	2	119650001	119660000	Nusap1	ENSMUSG00000027306	nucleolar and spindle associated protein 1 [Source:MGI Symbol;Acc:MGI:2675669]	overlapping	0	0.607766	0.334812	0.29011	0.287385	0.444691	0.343482
Chr2:119740001-119780000	2	119740001	119780000	SNORA44	ENSMUSG00000064722	Small nucleolar RNA SNORA44 [Source:RFAM;Acc:RF00405]	overlapping	0	0.721956	0.464826	0.406694	0.254195	0.364283	0.329178
Chr2:119800001-119810000	2	119800001	119810000	Tyro3	ENSMUSG00000027298	TYRO3 protein tyrosine kinase 3 [Source:MGI Symbol;Acc:MGI:104294]	overlapping	0	0.759607	0.501677	0.409589	0.693087	0.584881	0.275503
Chr2:119840001-119850000	2	119840001	119850000	null			Not found	0	0.600023	0.28194	0.420045	0.288004	0.495383	0.325587
Chr2:120010001-120100000	2	120010001	120100000	Mapkbp1	ENSMUSG00000033902	mitogen-activated protein kinase binding protein 1 [Source:MGI Symbol;Acc:MGI:1347004]	overlapping	0	0.755532	0.485618	0.411287	0.35973	0.43261	0.386611
Chr2:120170001-120210000	2	120170001	120210000	Pla2g4e	ENSMUSG00000050211	phospholipase A2, group IVE [Source:MGI Symbol;Acc:MGI:1919144]	overlapping	0	0.678533	0.443526	0.483421	0.503388	0.512951	0.407886
Chr2:120260001-120320000	2	120260001	120320000	Pla2g4d	ENSMUSG00000070719	phospholipase A2, group IVD [Source:MGI Symbol;Acc:MGI:1925640]	overlapping	0	0.669718	0.432774	0.465409	0.356773	0.327051	0.339899
Chr2:120460001-120470000	2	120460001	120470000	Ganc	ENSMUSG00000062646	glucosidase, alpha; neutral C [Source:MGI Symbol;Acc:MGI:1923301]	overlapping	0	0.694333	0.547669	0.519731	0.64739	0.645361	0.348859
Chr2:120490001-120510000	2	120490001	120510000	Capn3	ENSMUSG00000079110	calpain 3 [Source:MGI Symbol;Acc:MGI:107437]	overlapping	0	0.582253	0.396379	0.442632	0.162157	0.378267	0.287125
Chr2:120690001-120730000	2	120690001	120730000	Stard9	ENSMUSG00000033705	START domain containing 9 [Source:MGI Symbol;Acc:MGI:3045258]	overlapping	0	0.592934	0.459077	0.46466	0.568813	0.563118	0.413697
Chr2:121020001-121120000	2	121020001	121120000	Epb4.2	ENSMUSG00000023216	erythrocyte protein band 4.2 [Source:MGI Symbol;Acc:MGI:95402]	overlapping	0	0.572973	0.422698	0.434232	0.434203	0.39753	0.337039
Chr2:121210001-121220000	2	121210001	121220000	Trp53bp1	ENSMUSG00000043909	transformation related protein 53 binding protein 1 [Source:MGI Symbol;Acc:MGI:1351320]	overlapping	0	0.621874	0.383067	0.34985	0.18908	0.335965	0.322011
Chr2:121290001-121380000	2	121290001	121380000	Mtap1a	ENSMUSG00000027254	microtubule-associated protein 1 A [Source:MGI Symbol;Acc:MGI:1306776]	overlapping	0	0.616755	0.431075	0.417058	0.356876	0.414354	0.377868
Chr2:121440001-121450000	2	121440001	121450000	Ell3	ENSMUSG00000027246	elongation factor RNA polymerase II-like 3 [Source:MGI Symbol;Acc:MGI:2673679]	overlapping	0	0.572504	0.402623	0.293841	0.072001	0.268143	0.146704
Chr2:121550001-121560000	2	121550001	121560000	Frmd5	ENSMUSG00000027238	FERM domain containing 5 [Source:MGI Symbol;Acc:MGI:2442557]	overlapping	0	0.649253	0.518877	0.377475	0.476465	0.693606	0.409669
Chr2:121610001-121620000	2	121610001	121620000	Frmd5	ENSMUSG00000027238	FERM domain containing 5 [Source:MGI Symbol;Acc:MGI:2442557]	overlapping	0	0.702215	0.592484	0.346488	0.485852	0.609003	0.381047
Chr2:121720001-121730000	2	121720001	121730000	Frmd5	ENSMUSG00000027238	FERM domain containing 5 [Source:MGI Symbol;Acc:MGI:2442557]	overlapping	0	0.631274	0.469444	0.480902	0.216003	0.531741	0.418613
Chr2:121850001-121860000	2	121850001	121860000	null			Not found	0	0.70028	0.340514	0.498082	0.233539	0.447138	0.329162
Chr2:121950001-121960000	2	121950001	121960000	Mageb3	ENSMUSG00000074881	melanoma antigen, family B, 3 [Source:MGI Symbol;Acc:MGI:105109]	overlapping	0	0.570429	0.333634	0.278537	0.251694	0.529294	0.28087
Chr2:122120001-122130000	2	122120001	122130000	Patl2	ENSMUSG00000027233	protein associated with topoisomerase II homolog 2 (yeast) [Source:MGI Symbol;Acc:MGI:1914828]	overlapping	0	0.596012	0.339431	0.369264	0.377541	0.333518	0.313068
Chr2:122160001-122170000	2	122160001	122170000	Patl2	ENSMUSG00000027233	protein associated with topoisomerase II homolog 2 (yeast) [Source:MGI Symbol;Acc:MGI:1914828]	overlapping	0	0.611777	0.399277	0.424894	0.332463	0.256257	0.490168
Chr2:122260001-122390000	2	122260001	122390000	Sord	ENSMUSG00000027227	sorbitol dehydrogenase [Source:MGI Symbol;Acc:MGI:98266]	overlapping	0	0.661506	0.489145	0.510311	0.36333	0.343173	0.339631
Chr2:122470001-122480000	2	122470001	122480000	null			Not found	0	0.60583	0.415394	0.49435	0.485852	0.280379	0.23973
Chr2:122650001-122660000	2	122650001	122660000	null			Not found	0	0.834002	0.422179	0.538028	0.242926	0.362535	0.264767
Chr2:124610001-124670000	2	124610001	124670000	Sema6d	ENSMUSG00000027200	sema domain, transmembrane domain (TM), and cytoplasmic domain, (semaphorin) 6D [Source:MGI Symbol;Acc:MGI:2387661]	overlapping	0	0.544846	0.437754	0.463106	0.302824	0.418879	0.435902
Chr2:124700001-124710000	2	124700001	124710000	Gm13994	ENSMUSG00000087450	predicted gene 13994 [Source:MGI Symbol;Acc:MGI:3651835]	overlapping	0	0.692537	0.515437	0.592919	0.18908	0.222346	0.449036
Chr2:124770001-124780000	2	124770001	124780000	null			Not found	0	0.615509	0.379627	0.598516	0.269849	0.418121	0.474073
Chr2:124930001-124940000	2	124930001	124940000	null			Not found	0	0.596152	0.315256	0.573117	0.449542	0.492936	0.262975
Chr2:125060001-125070000	2	125060001	125070000	Slc24a5	ENSMUSG00000035183	solute carrier family 24, member 5 [Source:MGI Symbol;Acc:MGI:2677271]	overlapping	0	0.631134	0.392303	0.412582	0.440774	0.500278	0.355992
Chr2:125230001-125240000	2	125230001	125240000	Slc12a1	ENSMUSG00000027202	solute carrier family 12, member 1 [Source:MGI Symbol;Acc:MGI:103150]	overlapping	0	0.674976	0.287642	0.509655	0.413851	0.32373	0.144902
Chr2:125300001-125310000	2	125300001	125310000	Fbn1	ENSMUSG00000027204	fibrillin 1 [Source:MGI Symbol;Acc:MGI:95489]	overlapping	0	0.627402	0.436034	0.554829	0.34185	0.222346	0.282645
Chr2:125340001-125350000	2	125340001	125350000	Fbn1	ENSMUSG00000027204	fibrillin 1 [Source:MGI Symbol;Acc:MGI:95489]	overlapping	0	0.586054	0.430332	0.46448	0.495238	0.43735	0.497346
Chr2:125380001-125390000	2	125380001	125390000	Fbn1	ENSMUSG00000027204	fibrillin 1 [Source:MGI Symbol;Acc:MGI:95489]	overlapping	0	0.594076	0.427976	0.524968	0.107692	0.500278	0.547403
Chr2:125530001-125540000	2	125530001	125540000	null			Not found	0	0.580247	0.356631	0.507041	0.37816	0.466366	0.296983
Chr2:125640001-125650000	2	125640001	125650000	Shc4	ENSMUSG00000035109	SHC (Src homology 2 domain containing) family, member 4 [Source:MGI Symbol;Acc:MGI:2655364]	overlapping	0	0.604034	0.476324	0.60113	0.845857	0.555864	0.350642
Chr2:125710001-125750000	2	125710001	125750000	Shc4	ENSMUSG00000035109	SHC (Src homology 2 domain containing) family, member 4 [Source:MGI Symbol;Acc:MGI:2655364]	overlapping	0	0.61029	0.444339	0.49976	0.568968	0.53113	0.392672
Chr2:125930001-125940000	2	125930001	125940000	Galk2	ENSMUSG00000027207	galactokinase 2 [Source:MGI Symbol;Acc:MGI:1917226]	overlapping	0	0.597948	0.333634	0.4137	0.710623	0.367429	0.347067
Chr2:126170001-126180000	2	126170001	126180000	null			Not found	0	0.694333	0.255409	0.433114	0.197848	0.244021	0.245088
Chr2:126300001-126310000	2	126300001	126310000	null			Not found	0	0.607766	0.321052	0.487626	0.368773	0.393999	0.567099
Chr2:126580001-126610000	2	126580001	126610000	Slc27a2	ENSMUSG00000027359	solute carrier family 27 (fatty acid transporter), member 2 [Source:MGI Symbol;Acc:MGI:1347099]	overlapping	0	0.611178	0.423782	0.431618	0.120002	0.383395	0.282071
Chr2:126780001-126790000	2	126780001	126790000	Usp50	ENSMUSG00000027364	ubiquitin specific peptidase 50 [Source:MGI Symbol;Acc:MGI:1922333]	overlapping	0	0.580247	0.554549	0.372626	0.296772	0.691159	0.296965
Chr2:127110001-127120000	2	127110001	127120000	Ncaph	ENSMUSG00000034906	non-SMC condensin I complex, subunit H [Source:MGI Symbol;Acc:MGI:2444777]	overlapping	0	0.639296	0.480848	0.487248	0.710623	0.715282	0.311285
Chr2:127140001-127150000	2	127140001	127150000	Itpripl1	ENSMUSG00000074825	inositol 1,4,5-triphosphate receptor interacting protein-like 1 [Source:MGI Symbol;Acc:MGI:1920588]	overlapping	0	0.613713	0.45559	0.369634	0.170925	0.328624	0.268352
Chr2:127210001-127220000	2	127210001	127220000	Snrnp200	ENSMUSG00000003660	small nuclear ribonucleoprotein 200 (U5) [Source:MGI Symbol;Acc:MGI:2444401]	overlapping	0	0.603894	0.417656	0.45215	0.512775	0.415674	0.305908
Chr2:127240001-127250000	2	127240001	127250000	Snrnp200	ENSMUSG00000003660	small nuclear ribonucleoprotein 200 (U5) [Source:MGI Symbol;Acc:MGI:2444401]	overlapping	0	0.647457	0.437212	0.305045	0.269849	0.582434	0.457979
Chr2:127310001-127380000	2	127310001	127380000	Dusp2	ENSMUSG00000027368	dual specificity phosphatase 2 [Source:MGI Symbol;Acc:MGI:101911]	overlapping	0	0.694709	0.492764	0.435935	0.433082	0.39325	0.259406
Chr2:127400001-127580000	2	127400001	127580000	Gpat2	ENSMUSG00000046338	glycerol-3-phosphate acyltransferase 2, mitochondrial [Source:MGI Symbol;Acc:MGI:2684962]	overlapping	0	0.664771	0.4885	0.497706	0.453193	0.420918	0.401921
Chr2:127610001-127730000	2	127610001	127730000	Mal	ENSMUSG00000027375	myelin and lymphocyte protein, T cell differentiation protein [Source:MGI Symbol;Acc:MGI:892970]	overlapping	0	0.559896	0.405635	0.508844	0.38526	0.383657	0.403556
Chr2:127900001-127930000	2	127900001	127930000	Acoxl	ENSMUSG00000027380	acyl-Coenzyme A oxidase-like [Source:MGI Symbol;Acc:MGI:1921371]	overlapping	0	0.581491	0.470952	0.524091	0.453083	0.422084	0.288619
Chr2:127970001-127990000	2	127970001	127990000	Acoxl	ENSMUSG00000027380	acyl-Coenzyme A oxidase-like [Source:MGI Symbol;Acc:MGI:1921371]	overlapping	0	0.610739	0.514259	0.54811	0.260772	0.389105	0.569783
Chr2:128030001-128040000	2	128030001	128040000	Acoxl	ENSMUSG00000027380	acyl-Coenzyme A oxidase-like [Source:MGI Symbol;Acc:MGI:1921371]	overlapping	0	0.666954	0.503939	0.498451	1.46571	0.693606	0.277295
Chr2:128150001-128190000	2	128150001	128190000	Bcl2l11	ENSMUSG00000027381	BCL2-like 11 (apoptosis facilitator) [Source:MGI Symbol;Acc:MGI:1197519]	overlapping	0	0.619659	0.471435	0.455791	0.296772	0.396971	0.317988
Chr2:128260001-128300000	2	128260001	128300000	Gm14005	ENSMUSG00000074813	predicted gene 14005 [Source:MGI Symbol;Acc:MGI:3652191]	overlapping	0	0.579244	0.453575	0.504616	0.375504	0.369178	0.426223
Chr2:128320001-128370000	2	128320001	128370000	Gm14005	ENSMUSG00000074813	predicted gene 14005 [Source:MGI Symbol;Acc:MGI:3652191]	overlapping	0	0.653456	0.445232	0.538623	0.444281	0.434972	0.322015
Chr2:128390001-128440000	2	128390001	128440000	Gm14005	ENSMUSG00000074813	predicted gene 14005 [Source:MGI Symbol;Acc:MGI:3652191]	overlapping	0	0.657798	0.435091	0.467988	0.384927	0.443293	0.44938
Chr2:128490001-128520000	2	128490001	128520000	null			Not found	0	0.563884	0.482812	0.620172	0.30303	0.385026	0.416832
Chr2:128540001-128560000	2	128540001	128560000	null			Not found	0	0.65098	0.414757	0.490803	0.269849	0.331071	0.395358
Chr2:128580001-128590000	2	128580001	128590000	Gm355	ENSMUSG00000074812	predicted gene 355 [Source:MGI Symbol;Acc:MGI:2685201]	downstream	1209	0.582183	0.485466	0.573126	0.683082	0.507619	0.481224
Chr2:128610001-128620000	2	128610001	128620000	Anapc1	ENSMUSG00000014355	anaphase promoting complex subunit 1 [Source:MGI Symbol;Acc:MGI:103097]	overlapping	0	0.613852	0.477502	0.333797	0.49462	0.669484	0.484818
Chr2:128690001-128700000	2	128690001	128700000	Mertk	ENSMUSG00000014361	c-mer proto-oncogene tyrosine kinase [Source:MGI Symbol;Acc:MGI:96965]	overlapping	0	0.635564	0.479764	0.423028	0.261081	0.362535	0.291597
Chr2:128730001-128740000	2	128730001	128740000	Mertk	ENSMUSG00000014361	c-mer proto-oncogene tyrosine kinase [Source:MGI Symbol;Acc:MGI:96965]	overlapping	0	0.649532	0.314078	0.419297	0.413851	0.420569	0.563506
Chr2:128790001-128800000	2	128790001	128800000	Mertk	ENSMUSG00000014361	c-mer proto-oncogene tyrosine kinase [Source:MGI Symbol;Acc:MGI:96965]	overlapping	0	0.627542	0.457946	0.356573	1.76433	0.969091	0.40432
Chr2:128860001-128880000	2	128860001	128880000	Fbln7	ENSMUSG00000027386	fibulin 7 [Source:MGI Symbol;Acc:MGI:1917620]	overlapping	0	0.587162	0.402717	0.458504	0.234158	0.374596	0.401613
Chr2:128910001-128920000	2	128910001	128920000	null			Not found	0	0.729874	0.365773	0.543995	0.440774	0.582434	0.457961
Chr2:128980001-128990000	2	128980001	128990000	Zc3h6	ENSMUSG00000042851	zinc finger CCCH type containing 6 [Source:MGI Symbol;Acc:MGI:1926001]	overlapping	0	0.570429	0.327932	0.333418	0.117079	0.34086	0.375689
Chr2:129030001-129040000	2	129030001	129040000	Gm14025	ENSMUSG00000079051	predicted gene 14025 [Source:MGI Symbol;Acc:MGI:3649276]	overlapping	0	0.595873	0.488906	0.530935	0.422619	0.526847	0.293398
Chr2:129090001-129100000	2	129090001	129100000	Ttl	ENSMUSG00000027394	tubulin tyrosine ligase [Source:MGI Symbol;Acc:MGI:1916987]	overlapping	0	0.599884	0.528113	0.508537	0.37816	0.555864	0.32202
Chr2:129210001-129220000	2	129210001	129220000	Slc20a1	ENSMUSG00000027397	solute carrier family 20, member 1 [Source:MGI Symbol;Acc:MGI:108392]	overlapping	0	0.584119	0.487822	0.532062	0.377541	0.442244	0.425782
Chr2:129240001-129270000	2	129240001	129270000	Gm14024	ENSMUSG00000085485	predicted gene 14024 [Source:MGI Symbol;Acc:MGI:3649704]	overlapping	0	0.600761	0.452543	0.437591	0.401954	0.358457	0.338712
Chr2:129510001-129520000	2	129510001	129520000	F830045P16Rik	ENSMUSG00000043727	RIKEN cDNA F830045P16 gene [Source:MGI Symbol;Acc:MGI:3045317]	overlapping	0	0.572504	0.346311	0.505175	0.710005	0.526847	0.579609
Chr2:129540001-129630000	2	129540001	129630000	Gm14041	ENSMUSG00000087015	predicted gene 14041 [Source:MGI Symbol;Acc:MGI:3651081]	overlapping	0	0.656058	0.453658	0.579644	0.523492	0.440108	0.412657
Chr2:129680001-129700000	2	129680001	129700000	Pdyn	ENSMUSG00000027400	prodynorphin [Source:MGI Symbol;Acc:MGI:97535]	overlapping	0	0.670825	0.538433	0.562297	0.386928	0.35397	0.422188
Chr2:129820001-129840000	2	129820001	129840000	Stk35	ENSMUSG00000037885	serine/threonine kinase 35 [Source:MGI Symbol;Acc:MGI:1914583]	overlapping	0	0.593867	0.479175	0.462416	0.233849	0.374596	0.291597
Chr2:129860001-129890000	2	129860001	129890000	null			Not found	0	0.59403	0.459847	0.534672	0.788469	0.567168	0.345268
Chr2:129950001-129960000	2	129950001	129960000	null			Not found	0	0.603755	0.393481	0.564158	0.323695	0.389105	0.295181
Chr2:130010001-130020000	2	130010001	130020000	Tgm3	ENSMUSG00000027401	transglutaminase 3, E polypeptide [Source:MGI Symbol;Acc:MGI:98732]	overlapping	0	0.601959	0.468266	0.618679	0.278617	0.277932	0.434716
Chr2:130040001-130050000	2	130040001	130050000	Tgm3	ENSMUSG00000027401	transglutaminase 3, E polypeptide [Source:MGI Symbol;Acc:MGI:98732]	overlapping	0	0.651049	0.509641	0.506671	0.0538461	0.331071	0.38284
Chr2:130070001-130080000	2	130070001	130080000	SNORA17	ENSMUSG00000089152	Small nucleolar RNA SNORA17 [Source:RFAM;Acc:RF00560]	overlapping	0	0.584119	0.373925	0.57985	1.13324	0.560758	0.434707
Chr2:130120001-130160000	2	130120001	130160000	Tgm6	ENSMUSG00000027403	transglutaminase 6 [Source:MGI Symbol;Acc:MGI:3044321]	overlapping	0	0.623461	0.501335	0.510495	0.971549	0.482186	0.419511
Chr2:130190001-130200000	2	130190001	130200000	Tmc2	ENSMUSG00000060332	transmembrane channel-like gene family 2 [Source:MGI Symbol;Acc:MGI:2151017]	overlapping	0	0.635424	0.394565	0.457756	0.899084	0.61145	0.284446
Chr2:130290001-130310000	2	130290001	130310000	Ebf4	ENSMUSG00000053552	early B cell factor 4 [Source:MGI Symbol;Acc:MGI:2385972]	overlapping	0	0.658034	0.537255	0.500317	0.350927	0.320234	0.446357
Chr2:130350001-130370000	2	130350001	130370000	Ebf4	ENSMUSG00000053552	early B cell factor 4 [Source:MGI Symbol;Acc:MGI:2385972]	overlapping	0	0.682719	0.597102	0.574996	0.260772	0.209061	0.515214
Chr2:130390001-130450000	2	130390001	130450000	Cpxm1	ENSMUSG00000027408	carboxypeptidase X 1 (M14 family) [Source:MGI Symbol;Acc:MGI:1934569]	overlapping	0	0.589859	0.46902	0.446991	0.359799	0.405186	0.383736
Chr2:130550001-130600000	2	130550001	130600000	Ptpra	ENSMUSG00000027303	protein tyrosine phosphatase, receptor type, A [Source:MGI Symbol;Acc:MGI:97808]	overlapping	0	0.692868	0.465458	0.406006	0.390188	0.395397	0.343477
Chr2:130630001-130700000	2	130630001	130700000	Ubox5	ENSMUSG00000027300	U box domain containing 5 [Source:MGI Symbol;Acc:MGI:2154658]	overlapping	0	0.631433	0.468084	0.394922	0.372531	0.344206	0.325845
Chr2:130720001-130730000	2	130720001	130730000	4930402H24Rik	ENSMUSG00000027309	RIKEN cDNA 4930402H24 gene [Source:MGI Symbol;Acc:MGI:1923029]	overlapping	0	0.586194	0.410681	0.359557	0.53093	0.55097	0.46332
Chr2:130780001-130790000	2	130780001	130790000	4930402H24Rik	ENSMUSG00000027309	RIKEN cDNA 4930402H24 gene [Source:MGI Symbol;Acc:MGI:1923029]	overlapping	0	0.605691	0.45559	0.371139	0.638004	0.609003	0.336331
Chr2:130900001-130910000	2	130900001	130910000	4930402H24Rik	ENSMUSG00000027309	RIKEN cDNA 4930402H24 gene [Source:MGI Symbol;Acc:MGI:1923029]	overlapping	0	0.588269	0.415299	0.374122	0.333082	0.362535	0.420396
Chr2:131020001-131100000	2	131020001	131100000	Atrn	ENSMUSG00000027312	attractin [Source:MGI Symbol;Acc:MGI:1341628]	overlapping	0	0.75416	0.499615	0.487392	0.491255	0.456752	0.372551
Chr2:131120001-131260000	2	131120001	131260000	Hspa12b	ENSMUSG00000074793	heat shock protein 12B [Source:MGI Symbol;Acc:MGI:1919880]	overlapping	0	0.662991	0.448457	0.457382	0.478115	0.437424	0.34872
Chr2:131350001-131360000	2	131350001	131360000	Rnf24	ENSMUSG00000048911	ring finger protein 24 [Source:MGI Symbol;Acc:MGI:1261771]	overlapping	0	0.615788	0.422274	0.472313	0.395696	0.277932	0.250456
Chr2:131400001-131440000	2	131400001	131440000	RNaseP_nuc	ENSMUSG00000089113	Nuclear RNase P [Source:RFAM;Acc:RF00009]	overlapping	0	0.652157	0.414781	0.517776	0.299273	0.407896	0.306354
Chr2:131490001-131570000	2	131490001	131570000	Smox	ENSMUSG00000027333	spermine oxidase [Source:MGI Symbol;Acc:MGI:2445356]	overlapping	0	0.643773	0.489383	0.438713	0.332695	0.341384	0.361364
Chr2:131590001-131610000	2	131590001	131610000	null			Not found	0	0.612814	0.545313	0.533175	0.472081	0.496607	0.309488
Chr2:131630001-131640000	2	131630001	131640000	null			Not found	0	0.70028	0.409597	0.444687	1.10632	0.55097	0.466922
Chr2:131770001-131780000	2	131770001	131780000	null			Not found	0	0.572365	0.329016	0.527952	0.521543	0.613897	0.339925
Chr2:131870001-131880000	2	131870001	131880000	null			Not found	0	0.605551	0.493524	0.522345	0.513393	0.280379	0.373896
Chr2:131940001-132090000	2	131940001	132090000	Prnd	ENSMUSG00000027338	prion protein dublet [Source:MGI Symbol;Acc:MGI:1346999]	overlapping	0	0.607932	0.433517	0.467985	0.464733	0.453081	0.344792
Chr2:132150001-132180000	2	132150001	132180000	Gm14051	ENSMUSG00000086756	predicted gene 14051 [Source:MGI Symbol;Acc:MGI:3650008]	overlapping	0	0.512811	0.460931	0.449416	0.272978	0.341559	0.407883
Chr2:132210001-132240000	2	132210001	132240000	Gm14051	ENSMUSG00000086756	predicted gene 14051 [Source:MGI Symbol;Acc:MGI:3650008]	overlapping	0	0.577573	0.484712	0.404112	0.278823	0.302054	0.293386
Chr2:132270001-132310000	2	132270001	132310000	Cds2	ENSMUSG00000058793	CDP-diacylglycerol synthase (phosphatidate cytidylyltransferase) 2 [Source:MGI Symbol;Acc:MGI:1332236]	overlapping	0	0.591103	0.476548	0.446458	0.413851	0.378267	0.246433
Chr2:132420001-132430000	2	132420001	132430000	4921508D12Rik	ENSMUSG00000027345	RIKEN cDNA 4921508D12 gene [Source:MGI Symbol;Acc:MGI:1918095]	overlapping	0	0.613573	0.555633	0.44767	0.288004	0.492936	0.16459
Chr2:132450001-132460000	2	132450001	132460000	4921508D12Rik	ENSMUSG00000027345	RIKEN cDNA 4921508D12 gene [Source:MGI Symbol;Acc:MGI:1918095]	overlapping	0	0.607627	0.44871	0.429373	0.333082	0.275485	0.30054
Chr2:132490001-132500000	2	132490001	132500000	Gm14095	ENSMUSG00000086250	predicted gene 14095 [Source:MGI Symbol;Acc:MGI:3651962]	overlapping	0	0.643167	0.467088	0.609341	0.278617	0.386658	0.397151
Chr2:132590001-132600000	2	132590001	132600000	AU019990	ENSMUSG00000074783	expressed sequence AU019990 [Source:MGI Symbol;Acc:MGI:3034641]	overlapping	0	0.568493	0.480942	0.354708	0.251694	0.418121	0.177118
Chr2:132690001-132700000	2	132690001	132700000	1110034G24Rik	ENSMUSG00000044991	RIKEN cDNA 1110034G24 gene [Source:MGI Symbol;Acc:MGI:1920997]	overlapping	0	0.625606	0.432594	0.442073	0.351237	0.333518	0.248682
Chr2:132720001-132730000	2	132720001	132730000	1110034G24Rik	ENSMUSG00000044991	RIKEN cDNA 1110034G24 gene [Source:MGI Symbol;Acc:MGI:1920997]	overlapping	0	0.590205	0.623538	0.442452	0.404464	0.355194	0.49912
Chr2:132770001-132800000	2	132770001	132800000	Chgb	ENSMUSG00000027350	chromogranin B [Source:MGI Symbol;Acc:MGI:88395]	overlapping	0	0.58624	0.416477	0.419303	0.299901	0.491421	0.338114
Chr2:132870001-132880000	2	132870001	132880000	Lrrn4	ENSMUSG00000043110	leucine rich repeat neuronal 4 [Source:MGI Symbol;Acc:MGI:2445154]	overlapping	0	0.676633	0.647712	0.613082	0.377541	0.521953	0.198571
Chr2:133370001-133380000	2	133370001	133380000	null			Not found	0	0.598087	0.392303	0.658626	0.87278	0.299607	0.41682
Chr2:133550001-133560000	2	133550001	133560000	Bmp2	ENSMUSG00000027358	bone morphogenetic protein 2 [Source:MGI Symbol;Acc:MGI:88177]	overlapping	0	0.590065	0.392303	0.339403	0.125847	0.275485	0.34885
Chr2:133680001-133690000	2	133680001	133690000	null			Not found	0	0.57444	0.427976	0.608593	0.701855	0.587328	0.397151
Chr2:135880001-135890000	2	135880001	135890000	Plcb4	ENSMUSG00000039943	phospholipase C, beta 4 [Source:MGI Symbol;Acc:MGI:107464]	overlapping	0	0.597808	0.441736	0.588809	0.504007	0.444691	0.329162
Chr2:135990001-136000000	2	135990001	136000000	Plcb4	ENSMUSG00000039943	phospholipase C, beta 4 [Source:MGI Symbol;Acc:MGI:107464]	overlapping	0	0.619799	0.489	0.476423	0.458929	0.166759	0.418622
Chr2:136070001-136080000	2	136070001	136080000	6330527O06Rik	ENSMUSG00000027270	RIKEN cDNA 6330527O06 gene [Source:MGI Symbol;Acc:MGI:1923411]	upstream	84	0.586473	0.416477	0.544374	0.432006	0.331071	0.347049
Chr2:136850001-136860000	2	136850001	136860000	null			Not found	0	0.582183	0.403801	0.594037	0.278617	0.635573	0.311276
Chr2:137070001-137140000	2	137070001	137140000	2210009G21Rik	ENSMUSG00000027281	RIKEN cDNA 2210009G21 gene [Source:MGI Symbol;Acc:MGI:1921493]	overlapping	0	0.56796	0.468744	0.376307	0.354729	0.308297	0.266045
Chr2:137290001-137300000	2	137290001	137300000	Gm14055	ENSMUSG00000085504	predicted gene 14055 [Source:MGI Symbol;Acc:MGI:3650242]	overlapping	0	0.594216	0.484382	0.54176	0.441392	0.251362	0.318436
Chr2:138280001-138300000	2	138280001	138300000	Btbd3	ENSMUSG00000062098	BTB (POZ) domain containing 3 [Source:MGI Symbol;Acc:MGI:2385155]	overlapping	0	0.572435	0.401586	0.474368	0.47239	0.317786	0.382831
Chr2:139670001-139680000	2	139670001	139680000	Gm14066	ENSMUSG00000085071	predicted gene 14066 [Source:MGI Symbol;Acc:MGI:3649728]	overlapping	0	0.580247	0.360071	0.35807	0.252313	0.495383	0.304134
Chr2:139720001-139740000	2	139720001	139740000	Ism1	ENSMUSG00000074766	isthmin 1 homolog (zebrafish) [Source:MGI Symbol;Acc:MGI:2442963]	overlapping	0	0.593108	0.349209	0.512832	0.261081	0.343132	0.36584
Chr2:139790001-139800000	2	139790001	139800000	null			Not found	0	0.61952	0.522317	0.521237	0.368773	0.282826	0.440084
Chr2:139950001-139960000	2	139950001	139960000	Tasp1	ENSMUSG00000039033	taspase, threonine aspartase 1 [Source:MGI Symbol;Acc:MGI:1923062]	overlapping	0	0.617305	0.409597	0.595154	0.206616	0.277932	0.345265
Chr2:140200001-140210000	2	140200001	140210000	2310003L22Rik	ENSMUSG00000027384	RIKEN cDNA 2310003L22 gene [Source:MGI Symbol;Acc:MGI:1916737]	overlapping	0	0.77661	0.528113	0.432366	0.224771	0.420569	0.343482
Chr2:142340001-142350000	2	142340001	142350000	Macrod2	ENSMUSG00000068205	MACRO domain containing 2 [Source:MGI Symbol;Acc:MGI:1920149]	overlapping	0	0.598087	0.411859	0.485012	0.395696	0.362535	0.475866
Chr2:142530001-142540000	2	142530001	142540000	null			Not found	0	0.62367	0.271526	0.532052	0.279236	0.507619	0.270153
Chr2:142620001-142640000	2	142620001	142640000	Kif16b	ENSMUSG00000038844	kinesin family member 16B [Source:MGI Symbol;Acc:MGI:1098240]	overlapping	0	0.59698	0.438343	0.532985	0.368773	0.474931	0.330072
Chr2:142880001-142890000	2	142880001	142890000	Kif16b	ENSMUSG00000038844	kinesin family member 16B [Source:MGI Symbol;Acc:MGI:1098240]	overlapping	0	0.591862	0.379627	0.37524	0.495238	0.352747	0.364953
Chr2:143820001-143850000	2	143820001	143850000	Bfsp1	ENSMUSG00000027420	beaded filament structural protein 1, in lens-CP94 [Source:MGI Symbol;Acc:MGI:101770]	overlapping	0	0.618415	0.423389	0.482894	0.368979	0.419637	0.461567
Chr2:143940001-143980000	2	143940001	143980000	Dstn	ENSMUSG00000015932	destrin [Source:MGI Symbol;Acc:MGI:1929270]	overlapping	0	0.669304	0.507921	0.417807	0.47239	0.486993	0.479891
Chr2:144010001-144130000	2	144010001	144130000	Rrbp1	ENSMUSG00000027422	ribosome binding protein 1 [Source:MGI Symbol;Acc:MGI:1932395]	overlapping	0	0.592578	0.471624	0.508505	0.49462	0.397553	0.384925
Chr2:144170001-144250000	2	144170001	144250000	Gm5535	ENSMUSG00000074758	predicted gene 5535 [Source:MGI Symbol;Acc:MGI:3645019]	overlapping	0	0.634681	0.426968	0.475908	0.420504	0.424764	0.333194
Chr2:144290001-144300000	2	144290001	144300000	null			Not found	0	0.688526	0.556811	0.444687	0.224771	0.331071	0.296965
Chr2:144320001-144330000	2	144320001	144330000	Ovol2	ENSMUSG00000037279	ovo-like 2 (Drosophila) [Source:MGI Symbol;Acc:MGI:1338039]	overlapping	0	0.645242	0.268086	0.446922	0.323695	0.306949	0.431131
Chr2:144360001-144370000	2	144360001	144370000	Csrp2bp	ENSMUSG00000027425	cysteine and glycine-rich protein 2 binding protein [Source:MGI Symbol;Acc:MGI:1917264]	overlapping	0	0.653125	0.482026	0.374861	0.306159	0.420569	0.205722
Chr2:144390001-144450000	2	144390001	144450000	Csrp2bp	ENSMUSG00000027425	cysteine and glycine-rich protein 2 binding protein [Source:MGI Symbol;Acc:MGI:1917264]	overlapping	0	0.589167	0.439293	0.405358	0.437954	0.40239	0.283257
Chr2:144480001-144490000	2	144480001	144490000	6330439K17Rik	ENSMUSG00000037259	RIKEN cDNA 6330439K17 gene [Source:MGI Symbol;Acc:MGI:2139080]	overlapping	0	0.570429	0.44183	0.547736	0.953549	0.423016	0.447253
Chr2:144650001-144700000	2	144650001	144700000	Dtd1	ENSMUSG00000027430	D-tyrosyl-tRNA deacylase 1 homolog (S. cerevisiae) [Source:MGI Symbol;Acc:MGI:1913294]	overlapping	0	0.520508	0.469152	0.487175	0.476713	0.581944	0.347416
Chr2:144730001-144780000	2	144730001	144780000	Dtd1	ENSMUSG00000027430	D-tyrosyl-tRNA deacylase 1 homolog (S. cerevisiae) [Source:MGI Symbol;Acc:MGI:1913294]	overlapping	0	0.588241	0.472375	0.459923	0.476836	0.377987	0.297687
Chr2:144830001-144840000	2	144830001	144840000	null			Not found	0	0.594216	0.378543	0.496207	0.845857	0.555864	0.642239
Chr2:144930001-144940000	2	144930001	144940000	null			Not found	0	0.576236	0.289904	0.734797	0.422619	0.587328	0.558156
Chr2:145160001-145170000	2	145160001	145170000	Slc24a3	ENSMUSG00000063873	solute carrier family 24 (sodium/potassium/calcium exchanger), member 3 [Source:MGI Symbol;Acc:MGI:2137513]	overlapping	0	0.7632	0.437212	0.34985	0.216003	0.304502	0.155647
Chr2:145220001-145230000	2	145220001	145230000	Slc24a3	ENSMUSG00000063873	solute carrier family 24 (sodium/potassium/calcium exchanger), member 3 [Source:MGI Symbol;Acc:MGI:2137513]	overlapping	0	0.61952	0.494702	0.658626	0.323695	0.495383	0.372104
Chr2:145410001-145420000	2	145410001	145420000	Slc24a3	ENSMUSG00000063873	solute carrier family 24 (sodium/potassium/calcium exchanger), member 3 [Source:MGI Symbol;Acc:MGI:2137513]	overlapping	0	0.710237	0.48556	0.509655	0.323695	0.246468	0.334539
Chr2:145580001-145590000	2	145580001	145590000	Slc24a3	ENSMUSG00000063873	solute carrier family 24 (sodium/potassium/calcium exchanger), member 3 [Source:MGI Symbol;Acc:MGI:2137513]	overlapping	0	0.613573	0.44183	0.511899	0.422619	0.442244	0.479414
Chr2:145610001-145620000	2	145610001	145620000	Slc24a3	ENSMUSG00000063873	solute carrier family 24 (sodium/potassium/calcium exchanger), member 3 [Source:MGI Symbol;Acc:MGI:2137513]	overlapping	0	0.603894	0.541967	0.377854	0.467697	0.589775	0.411453
Chr2:145670001-145730000	2	145670001	145730000	BC039771	ENSMUSG00000087594	cDNA sequence BC039771 [Source:MGI Symbol;Acc:MGI:3040676]	overlapping	0	0.590504	0.477471	0.452028	0.356979	0.36574	0.336918
Chr2:145750001-145760000	2	145750001	145760000	BC039771	ENSMUSG00000087594	cDNA sequence BC039771 [Source:MGI Symbol;Acc:MGI:3040676]	overlapping	0	0.576515	0.489	0.43909	0.746933	0.40134	0.350633
Chr2:145790001-145800000	2	145790001	145800000	Rin2	ENSMUSG00000001768	Ras and Rab interactor 2 [Source:MGI Symbol;Acc:MGI:1921280]	overlapping	0	0.593937	0.471706	0.413321	0.332463	0.302054	0.561723
Chr2:145820001-145870000	2	145820001	145870000	Rin2	ENSMUSG00000001768	Ras and Rab interactor 2 [Source:MGI Symbol;Acc:MGI:1921280]	overlapping	0	0.595266	0.482733	0.422731	0.458681	0.408892	0.427199
Chr2:146180001-146220000	2	146180001	146220000	4930529M08Rik	ENSMUSG00000037143	RIKEN cDNA 4930529M08 gene [Source:MGI Symbol;Acc:MGI:1926024]	overlapping	0	0.562547	0.454435	0.441699	0.39616	0.394524	0.357343
Chr2:146590001-146600000	2	146590001	146600000	null			Not found	0	0.666814	0.486739	0.491358	0.269849	0.277932	0.28087
Chr2:146680001-146690000	2	146680001	146690000	null			Not found	0	0.63722	0.45215	0.48166	0.404464	0.389105	0.320228
Chr2:146830001-146840000	2	146830001	146840000	Gm14114	ENSMUSG00000087618	predicted gene 14114 [Source:MGI Symbol;Acc:MGI:3652257]	overlapping	0	0.651049	0.380805	0.431996	0.458929	0.386658	0.450819
Chr2:147170001-147190000	2	147170001	147190000	Nkx2-2	ENSMUSG00000027434	NK2 transcription factor related, locus 2 (Drosophila) [Source:MGI Symbol;Acc:MGI:97347]	overlapping	0	0.578381	0.365867	0.313075	0.355621	0.275485	0.278187
Chr2:147240001-147250000	2	147240001	147250000	Nkx2-2as	ENSMUSG00000086509	NK2 transcription factor related, locus 2 (Drosophila), antisense [Source:MGI Symbol;Acc:MGI:3652259]	overlapping	0	0.74951	0.637298	0.49472	0.206616	0.471261	0.513422
Chr2:147290001-147300000	2	147290001	147300000	Nkx2-2as	ENSMUSG00000086509	NK2 transcription factor related, locus 2 (Drosophila), antisense [Source:MGI Symbol;Acc:MGI:3652259]	overlapping	0	0.58813	0.340514	0.487996	0.396314	0.275485	0.381047
Chr2:147980001-147990000	2	147980001	147990000	9030622O22Rik	ENSMUSG00000086141	RIKEN cDNA 9030622O22 gene [Source:MGI Symbol;Acc:MGI:1918820]	overlapping	0	0.586333	0.398099	0.525338	0.423238	0.32373	0.379264
Chr2:148090001-148100000	2	148090001	148100000	null			Not found	0	0.570429	0.453328	0.459253	0.314308	0.277932	0.624334
Chr2:148390001-148410000	2	148390001	148410000	Sstr4	ENSMUSG00000037014	somatostatin receptor 4 [Source:MGI Symbol;Acc:MGI:105372]	overlapping	0	0.606728	0.521139	0.482957	0.360005	0.412004	0.334534
Chr2:148450001-148460000	2	148450001	148460000	null			Not found	0	0.576376	0.441736	0.555586	1.23278	0.423016	0.488393
Chr2:148540001-148550000	2	148540001	148550000	null			Not found	0	0.61952	0.540789	0.582085	0.37816	0.302054	0.583203
Chr2:148620001-148630000	2	148620001	148630000	SNORA17	ENSMUSG00000088870	Small nucleolar RNA SNORA17 [Source:RFAM;Acc:RF00560]	overlapping	0	0.566558	0.501583	0.573874	1.83448	0.531741	0.520591
Chr2:148770001-148780000	2	148770001	148780000	Cst11	ENSMUSG00000036958	cystatin 11 [Source:MGI Symbol;Acc:MGI:1925490]	overlapping	0	0.586194	0.506201	0.557443	0.278617	0.268143	0.554563
Chr2:148870001-148880000	2	148870001	148880000	Cst3	ENSMUSG00000027447	cystatin C [Source:MGI Symbol;Acc:MGI:102519]	overlapping	0	0.665018	0.58452	0.474557	0.377541	0.277932	0.338114
Chr2:149840001-149850000	2	149840001	149850000	Tmem90b	ENSMUSG00000074736	transmembrane protein 90B [Source:MGI Symbol;Acc:MGI:3702158]	overlapping	0	0.603894	0.539611	0.496585	0.504007	0.328624	0.300558
Chr2:149900001-149940000	2	149900001	149940000	Tmem90b	ENSMUSG00000074736	transmembrane protein 90B [Source:MGI Symbol;Acc:MGI:3702158]	overlapping	0	0.596391	0.435468	0.581623	0.424966	0.40842	0.432919
Chr2:150570001-150580000	2	150570001	150580000	Cst7	ENSMUSG00000068129	cystatin F (leukocystatin) [Source:MGI Symbol;Acc:MGI:1298217]	overlapping	0	0.73167	0.543051	0.496585	0.314927	0.439797	0.407886
Chr2:150640001-150670000	2	150640001	150670000	Acss1	ENSMUSG00000027452	acyl-CoA synthetase short-chain family member 1 [Source:MGI Symbol;Acc:MGI:1915988]	overlapping	0	0.642568	0.488576	0.515002	0.458723	0.373839	0.388805
Chr2:150740001-150780000	2	150740001	150780000	Entpd6	ENSMUSG00000033068	ectonucleoside triphosphate diphosphohydrolase 6 [Source:MGI Symbol;Acc:MGI:1202295]	overlapping	0	0.626539	0.52234	0.433673	0.692623	0.624735	0.382837
Chr2:150800001-150840000	2	150800001	150840000	Pygb	ENSMUSG00000033059	brain glycogen phosphorylase [Source:MGI Symbol;Acc:MGI:97828]	overlapping	0	0.725932	0.48291	0.45281	0.568659	0.368566	0.483915
Chr2:150940001-150980000	2	150940001	150980000	Ninl	ENSMUSG00000068115	ninein-like [Source:MGI Symbol;Acc:MGI:1925427]	overlapping	0	0.625916	0.490108	0.510026	0.456582	0.457976	0.433372
Chr2:151000001-151010000	2	151000001	151010000	Ninl	ENSMUSG00000068115	ninein-like [Source:MGI Symbol;Acc:MGI:1925427]	overlapping	0	0.57444	0.318696	0.289371	0.296772	0.389105	0.395367
Chr2:151580001-151640000	2	151580001	151640000	Sdcbp2	ENSMUSG00000027456	syndecan binding protein (syntenin) 2 [Source:MGI Symbol;Acc:MGI:2385156]	overlapping	0	0.700672	0.539022	0.49528	0.364389	0.403205	0.351531
Chr2:151690001-151720000	2	151690001	151720000	5430405G05Rik	ENSMUSG00000044364	RIKEN cDNA 5430405G05 gene [Source:MGI Symbol;Acc:MGI:1918629]	overlapping	0	0.690369	0.481696	0.543256	0.374825	0.348784	0.376877
Chr2:151740001-152130000	2	151740001	152130000	Psmf1	ENSMUSG00000032869	proteasome (prosome, macropain) inhibitor subunit 1 [Source:MGI Symbol;Acc:MGI:1346072]	overlapping	0	0.635963	0.474392	0.480504	0.399965	0.427247	0.369626
Chr2:152190001-152200000	2	152190001	152200000	null			Not found	0	0.71798	0.493524	0.525707	0.251694	0.357641	0.26655
Chr2:152300001-152410000	2	152300001	152410000	Tbc1d20	ENSMUSG00000027465	TBC1 domain family, member 20 [Source:MGI Symbol;Acc:MGI:1914481]	overlapping	0	0.575647	0.417407	0.408909	0.421878	0.390408	0.321525
Chr2:152440001-152450000	2	152440001	152450000	6820408C15Rik	ENSMUSG00000032680	RIKEN cDNA 6820408C15 gene [Source:MGI Symbol;Acc:MGI:3045333]	overlapping	0	0.684794	0.378543	0.429383	0.269849	0.430008	0.343473
Chr2:152530001-152540000	2	152530001	152540000	Defb29	ENSMUSG00000044249	defensin beta 29 [Source:MGI Symbol;Acc:MGI:1922650]	overlapping	0	0.574301	0.527029	0.423407	0.306159	0.352747	0.354218
Chr2:152570001-152790000	2	152570001	152790000	Defb21	ENSMUSG00000056544	defensin beta 21 [Source:MGI Symbol;Acc:MGI:2684967]	overlapping	0	0.602996	0.447206	0.414138	0.455886	0.464904	0.352586
Chr2:152810001-152830000	2	152810001	152830000	Bcl2l1	ENSMUSG00000007659	BCL2-like 1 [Source:MGI Symbol;Acc:MGI:88139]	overlapping	0	0.600093	0.525804	0.458689	0.422619	0.34925	0.248668
Chr2:152910001-152950000	2	152910001	152950000	Mylk2	ENSMUSG00000027470	myosin, light polypeptide kinase 2, skeletal muscle [Source:MGI Symbol;Acc:MGI:2139434]	overlapping	0	0.72244	0.45129	0.452711	0.339813	0.454917	0.293391
Chr2:152980001-153090000	2	152980001	153090000	Ttll9	ENSMUSG00000074673	tubulin tyrosine ligase-like family, member 9 [Source:MGI Symbol;Acc:MGI:1913589]	overlapping	0	0.587112	0.481212	0.396725	0.391935	0.519188	0.357467
Chr2:153110001-153140000	2	153110001	153140000	Hck	ENSMUSG00000003283	hemopoietic cell kinase [Source:MGI Symbol;Acc:MGI:96052]	overlapping	0	0.612422	0.458669	0.470447	0.356876	0.471261	0.355397
Chr2:153220001-153230000	2	153220001	153230000	Tspyl3	ENSMUSG00000074671	TSPY-like 3 [Source:MGI Symbol;Acc:MGI:2139328]	overlapping	0	0.649114	0.437212	0.58844	0.350618	0.355194	0.339925
Chr2:153290001-153300000	2	153290001	153300000	Kif3b	ENSMUSG00000027475	kinesin family member 3B [Source:MGI Symbol;Acc:MGI:107688]	overlapping	0	0.613713	0.470528	0.385326	0.368773	0.193329	0.352425
Chr2:153330001-153340000	2	153330001	153340000	Kif3b	ENSMUSG00000027475	kinesin family member 3B [Source:MGI Symbol;Acc:MGI:107688]	overlapping	0	0.598087	0.521139	0.623168	0.63924	0.282826	0.284455
Chr2:153400001-153450000	2	153400001	153450000	Asxl1	ENSMUSG00000042548	additional sex combs like 1 (Drosophila) [Source:MGI Symbol;Acc:MGI:2684063]	overlapping	0	0.690019	0.474929	0.44581	0.376035	0.439377	0.338829
Chr2:153470001-153570000	2	153470001	153570000	8430427H17Rik	ENSMUSG00000061411	RIKEN cDNA 8430427H17 gene [Source:MGI Symbol;Acc:MGI:1918765]	overlapping	0	0.688027	0.436632	0.430235	0.381481	0.44151	0.311454
Chr2:153790001-153820000	2	153790001	153820000	Efcab8	ENSMUSG00000044083	EF-hand calcium binding domain 8 [Source:MGI Symbol;Acc:MGI:3644206]	overlapping	0	0.736373	0.577514	0.483769	0.488775	0.413227	0.367325
Chr2:153840001-153970000	2	153840001	153970000	Efcab8	ENSMUSG00000044083	EF-hand calcium binding domain 8 [Source:MGI Symbol;Acc:MGI:3644206]	overlapping	0	0.660613	0.45986	0.565459	0.384619	0.445605	0.449855
Chr2:154130001-154140000	2	154130001	154140000	Bpifa3	ENSMUSG00000027482	BPI fold containing family A, member 3 [Source:MGI Symbol;Acc:MGI:1920638]	overlapping	0	0.692397	0.532637	0.650415	0.377541	0.379316	0.49377
Chr2:154160001-154170000	2	154160001	154170000	Bpifa5	ENSMUSG00000027484	BPI fold containing family A, member 5 [Source:MGI Symbol;Acc:MGI:1914385]	overlapping	0	0.651049	0.505023	0.610098	0.998627	0.717729	0.499102
Chr2:154190001-154240000	2	154190001	154240000	Bpifb1	ENSMUSG00000027485	BPI fold containing family B, member 1 [Source:MGI Symbol;Acc:MGI:2137431]	overlapping	0	0.666068	0.50392	0.559983	0.429881	0.395328	0.415043
Chr2:154540001-154560000	2	154540001	154560000	Necab3	ENSMUSG00000027489	N-terminal EF-hand calcium binding protein 3 [Source:MGI Symbol;Acc:MGI:1861721]	overlapping	0	0.630445	0.472837	0.341075	0.476774	0.49416	0.356001
Chr2:154580001-154590000	2	154580001	154590000	Pxmp4	ENSMUSG00000000876	peroxisomal membrane protein 4 [Source:MGI Symbol;Acc:MGI:1891701]	overlapping	0	0.574301	0.499321	0.377115	0.323695	0.217451	0.366736
Chr2:154630001-154650000	2	154630001	154650000	Zfp341	ENSMUSG00000059842	zinc finger protein 341 [Source:MGI Symbol;Acc:MGI:2682937]	overlapping	0	0.657136	0.524084	0.376925	0.418235	0.636796	0.344374
Chr2:154690001-154730000	2	154690001	154730000	Chmp4b	ENSMUSG00000038467	charged multivesicular body protein 4B [Source:MGI Symbol;Acc:MGI:1922858]	overlapping	0	0.621111	0.384269	0.356758	0.294735	0.366119	0.288019
Chr2:154750001-154770000	2	154750001	154770000	null			Not found	0	0.632451	0.432005	0.454016	0.166541	0.340685	0.247768
Chr2:154960001-154970000	2	154960001	154970000	a	ENSMUSG00000027596	nonagouti [Source:MGI Symbol;Acc:MGI:87853]	overlapping	0	0.574301	0.390041	0.380477	0.278617	0.224793	0.441885
Chr2:155060001-155070000	2	155060001	155070000	Ahcy	ENSMUSG00000027597	S-adenosylhomocysteine hydrolase [Source:MGI Symbol;Acc:MGI:87968]	overlapping	0	0.605691	0.629334	0.612703	0.602931	0.38421	0.323812
Chr2:155380001-155390000	2	155380001	155390000	Trp53inp2	ENSMUSG00000038375	transformation related protein 53 inducible nuclear protein 2 [Source:MGI Symbol;Acc:MGI:1915978]	overlapping	0	0.653264	0.517699	0.342756	0.395696	0.357641	0.26655
Chr2:155600001-155640000	2	155600001	155640000	Myh7b	ENSMUSG00000074652	myosin, heavy chain 7B, cardiac muscle, beta [Source:MGI Symbol;Acc:MGI:3710243]	overlapping	0	0.689978	0.47689	0.386252	0.411504	0.438661	0.347954
Chr2:155740001-155750000	2	155740001	155750000	Procr	ENSMUSG00000027611	protein C receptor, endothelial [Source:MGI Symbol;Acc:MGI:104596]	downstream	1117	0.580108	0.345132	0.356943	0.170925	0.405886	0.413245
Chr2:155780001-155850000	2	155780001	155850000	Mmp24	ENSMUSG00000027612	matrix metallopeptidase 24 [Source:MGI Symbol;Acc:MGI:1341867]	overlapping	0	0.598008	0.452163	0.408151	0.322531	0.390453	0.332749
Chr2:155980001-156080000	2	155980001	156080000	Cep250	ENSMUSG00000038241	centrosomal protein 250 [Source:MGI Symbol;Acc:MGI:108084]	overlapping	0	0.581035	0.456622	0.425309	0.493805	0.501956	0.407521
Chr2:156370001-156380000	2	156370001	156380000	4921517L17Rik	ENSMUSG00000038085	RIKEN cDNA 4921517L17 gene [Source:MGI Symbol;Acc:MGI:1918123]	overlapping	0	0.57444	0.421096	0.513017	0.683082	0.577539	0.495544
Chr2:156420001-156450000	2	156420001	156450000	Epb4.1l1	ENSMUSG00000027624	erythrocyte protein band 4.1-like 1 [Source:MGI Symbol;Acc:MGI:103010]	overlapping	0	0.569784	0.507771	0.46597	0.36585	0.438981	0.416226
Chr2:156470001-156550000	2	156470001	156550000	Epb4.1l1	ENSMUSG00000027624	erythrocyte protein band 4.1-like 1 [Source:MGI Symbol;Acc:MGI:103010]	overlapping	0	0.686226	0.467212	0.414677	0.331754	0.397277	0.360469
Chr2:156570001-156710000	2	156570001	156710000	Gm14168	ENSMUSG00000055494	predicted gene 14168 [Source:MGI Symbol;Acc:MGI:3651463]	overlapping	0	0.625871	0.463311	0.402842	0.447884	0.479576	0.404816
Chr2:156730001-156750000	2	156730001	156750000	Dlgap4	ENSMUSG00000061689	discs, large homolog-associated protein 4 (Drosophila) [Source:MGI Symbol;Acc:MGI:2138865]	overlapping	0	0.594076	0.479717	0.29833	0.346234	0.360088	0.464225
Chr2:156770001-156780000	2	156770001	156780000	Myl9	ENSMUSG00000067818	myosin, light polypeptide 9, regulatory [Source:MGI Symbol;Acc:MGI:2138915]	overlapping	0	0.596012	0.437212	0.474187	1.06186	0.613897	0.327388
Chr2:156810001-156820000	2	156810001	156820000	null			Not found	0	0.627402	0.517699	0.401009	1.06124	0.505172	0.395367
Chr2:156840001-156850000	2	156840001	156850000	Tgif2	ENSMUSG00000062175	TGFB-induced factor homeobox 2 [Source:MGI Symbol;Acc:MGI:1915299]	overlapping	0	0.586333	0.570665	0.458874	0.458929	0.500278	0.243296
Chr2:156870001-156890000	2	156870001	156890000	1110008F13Rik	ENSMUSG00000027637	RIKEN cDNA 1110008F13 gene [Source:MGI Symbol;Acc:MGI:1914638]	overlapping	0	0.697446	0.478586	0.420414	0.333082	0.415674	0.3721
Chr2:157010001-157080000	2	157010001	157080000	9830001H06Rik	ENSMUSG00000055485	RIKEN cDNA 9830001H06 gene [Source:MGI Symbol;Acc:MGI:2444575]	overlapping	0	0.660118	0.500768	0.435727	0.376465	0.407034	0.318174
Chr2:157360001-157370000	2	157360001	157370000	Manbal	ENSMUSG00000063019	mannosidase, beta A, lysosomal-like [Source:MGI Symbol;Acc:MGI:1916411]	overlapping	0	0.599744	0.392303	0.410707	0.179693	0.418121	0.38284
Chr2:157410001-157510000	2	157410001	157510000	Src	ENSMUSG00000027646	Rous sarcoma oncogene [Source:MGI Symbol;Acc:MGI:98397]	overlapping	0	0.671751	0.432377	0.452114	0.328265	0.479232	0.318078
Chr2:157530001-157540000	2	157530001	157540000	null			Not found	0	0.582322	0.502761	0.506293	0.333082	0.534189	0.391783
Chr2:157600001-157620000	2	157600001	157620000	null			Not found	0	0.625467	0.457357	0.449915	0.549394	0.294887	0.35243
Chr2:157640001-157670000	2	157640001	157670000	null			Not found	0	0.5206	0.348997	0.410461	0.764675	0.605857	0.31009
Chr2:157690001-157720000	2	157690001	157720000	SNORA17	ENSMUSG00000077290	Small nucleolar RNA SNORA17 [Source:RFAM;Acc:RF00560]	overlapping	0	0.657548	0.443306	0.437218	0.326824	0.574393	0.304125
Chr2:157750001-157760000	2	157750001	157760000	Ctnnbl1	ENSMUSG00000027649	catenin, beta like 1 [Source:MGI Symbol;Acc:MGI:1913892]	overlapping	0	0.641092	0.475146	0.442073	0.45831	0.360088	0.296974
Chr2:157850001-158000000	2	157850001	158000000	Ctnnbl1	ENSMUSG00000027649	catenin, beta like 1 [Source:MGI Symbol;Acc:MGI:1913892]	overlapping	0	0.601157	0.465417	0.390747	0.378414	0.426955	0.342045
Chr2:158070001-158080000	2	158070001	158080000	Rprd1b	ENSMUSG00000027651	regulation of nuclear pre-mRNA domain containing 1B [Source:MGI Symbol;Acc:MGI:1917720]	overlapping	0	0.588409	0.590222	0.316996	0.15277	0.333518	0.461555
Chr2:158100001-158270000	2	158100001	158270000	Rprd1b	ENSMUSG00000027651	regulation of nuclear pre-mRNA domain containing 1B [Source:MGI Symbol;Acc:MGI:1917720]	overlapping	0	0.684059	0.468388	0.494873	0.567246	0.452506	0.354317
Chr2:158300001-158340000	2	158300001	158340000	Lbp	ENSMUSG00000016024	lipopolysaccharide binding protein [Source:MGI Symbol;Acc:MGI:1098776]	overlapping	0	0.60137	0.493842	0.470643	0.40008	0.508668	0.367633
Chr2:158500001-158540000	2	158500001	158540000	Adig	ENSMUSG00000044405	adipogenin [Source:MGI Symbol;Acc:MGI:2675492]	overlapping	0	0.633419	0.392327	0.456634	0.330735	0.377043	0.326044
Chr2:158560001-158590000	2	158560001	158590000	null			Not found	0	0.638743	0.403833	0.535919	0.509852	0.39633	0.34229
Chr2:158610001-158620000	2	158610001	158620000	Gm14204	ENSMUSG00000086496	predicted gene 14204 [Source:MGI Symbol;Acc:MGI:3651576]	overlapping	0	0.639296	0.427976	0.415935	0.269849	0.601662	0.352425
Chr2:158650001-158670000	2	158650001	158670000	Ppp1r16b	ENSMUSG00000037754	protein phosphatase 1, regulatory (inhibitor) subunit 16B [Source:MGI Symbol;Acc:MGI:2151841]	overlapping	0	0.58813	0.444634	0.377295	0.494929	0.382987	0.330054
Chr2:158710001-158780000	2	158710001	158780000	Ppp1r16b	ENSMUSG00000037754	protein phosphatase 1, regulatory (inhibitor) subunit 16B [Source:MGI Symbol;Acc:MGI:2151841]	overlapping	0	0.623234	0.52709	0.481171	0.354906	0.411879	0.339654
Chr2:158820001-158830000	2	158820001	158830000	Dhx35	ENSMUSG00000027655	DEAH (Asp-Glu-Ala-His) box polypeptide 35 [Source:MGI Symbol;Acc:MGI:1918965]	overlapping	0	0.623391	0.478586	0.348362	0.269849	0.355194	0.518799
Chr2:158860001-158870000	2	158860001	158870000	Dhx35	ENSMUSG00000027655	DEAH (Asp-Glu-Ala-His) box polypeptide 35 [Source:MGI Symbol;Acc:MGI:1918965]	upstream	1787	0.658932	0.5914	0.335663	0.611699	0.413227	0.536685
Chr2:158890001-158920000	2	158890001	158920000	null			Not found	0	0.600436	0.529621	0.482402	0.401542	0.502608	0.271336
Chr2:158940001-158950000	2	158940001	158950000	null			Not found	0	0.607905	0.333634	0.607854	0.872161	0.773315	0.434707
Chr2:158990001-159040000	2	158990001	159040000	null			Not found	0	0.569296	0.4641	0.557223	0.525422	0.493495	0.363155
Chr2:160230001-160240000	2	160230001	160240000	null			Not found	0	0.713969	0.363605	0.482399	0.575389	0.623686	0.488393
Chr2:160260001-160270000	2	160260001	160270000	null			Not found	0	0.605691	0.362427	0.645566	0.350618	0.413227	0.584986
Chr2:160320001-160380000	2	160320001	160380000	Gm826	ENSMUSG00000074623	predicted gene 826 [Source:MGI Symbol;Acc:MGI:2685672]	overlapping	0	0.593108	0.447925	0.538031	0.335798	0.437408	0.411459
Chr2:160430001-160440000	2	160430001	160440000	null			Not found	0	0.584258	0.474062	0.648549	0.539698	0.45448	0.558147
Chr2:160480001-160500000	2	160480001	160500000	null			Not found	0	0.593178	0.545313	0.474187	0.337466	0.483322	0.311276
Chr2:160520001-160530000	2	160520001	160530000	null			Not found	0	0.623252	0.580891	0.655264	0.242926	0.193329	0.402509
Chr2:160730001-160770000	2	160730001	160770000	Plcg1	ENSMUSG00000016933	phospholipase C, gamma 1 [Source:MGI Symbol;Acc:MGI:97615]	overlapping	0	0.681127	0.490108	0.473063	0.653812	0.647109	0.444555
Chr2:160880001-160910000	2	160880001	160910000	Gm16751	ENSMUSG00000085303	predicted gene, 16751 [Source:MGI Symbol;Acc:MGI:4439675]	overlapping	0	0.674604	0.531883	0.471571	0.417186	0.575208	0.385815
Chr2:160930001-160950000	2	160930001	160950000	Chd6	ENSMUSG00000057133	chromodomain helicase DNA binding protein 6 [Source:MGI Symbol;Acc:MGI:1918639]	overlapping	0	0.61959	0.432547	0.417805	0.220387	0.471261	0.292493
Chr2:161130001-161140000	2	161130001	161140000	null			Not found	0	0.654782	0.338252	0.583581	0.314927	0.442244	0.347076
Chr2:161390001-161400000	2	161390001	161400000	null			Not found	0	0.592141	0.429154	0.628756	0.458929	0.338413	0.393584
Chr2:162670001-162680000	2	162670001	162680000	Gm14246	ENSMUSG00000087536	predicted gene 14246 [Source:MGI Symbol;Acc:MGI:3651253]	overlapping	0	0.643585	0.477502	0.466346	0.134615	0.604109	0.255824
Chr2:162890001-162900000	2	162890001	162900000	null			Not found	0	0.663082	0.419917	0.630621	0.49462	0.558311	0.384632
Chr2:162950001-163000000	2	162950001	163000000	L3mbtl1	ENSMUSG00000035576	l(3)mbt-like (Drosophila) [Source:MGI Symbol;Acc:MGI:2676663]	overlapping	0	0.580662	0.487587	0.427585	0.295018	0.505591	0.410028
Chr2:163050001-163080000	2	163050001	163080000	Mybl2	ENSMUSG00000017861	myeloblastosis oncogene-like 2 [Source:MGI Symbol;Acc:MGI:101785]	overlapping	0	0.589513	0.43184	0.349354	0.260669	0.488974	0.348844
Chr2:163110001-163120000	2	163110001	163120000	null			Not found	0	0.692118	0.543051	0.491727	0.314927	0.466366	0.33453
Chr2:163140001-163160000	2	163140001	163160000	Gm11454	ENSMUSG00000086152	predicted gene 11454 [Source:MGI Symbol;Acc:MGI:3650530]	overlapping	0	0.643097	0.458441	0.508906	0.373157	0.447138	0.296068
Chr2:163200001-163260000	2	163200001	163260000	Tox2	ENSMUSG00000074607	TOX high mobility group box family member 2 [Source:MGI Symbol;Acc:MGI:3611233]	overlapping	0	0.627795	0.44604	0.430186	0.322337	0.392309	0.342588
Chr2:163310001-163400000	2	163310001	163400000	Tox2	ENSMUSG00000074607	TOX high mobility group box family member 2 [Source:MGI Symbol;Acc:MGI:3611233]	overlapping	0	0.630123	0.439092	0.446054	0.372945	0.434747	0.337125
Chr2:163430001-163460000	2	163430001	163460000	Gdap1l1	ENSMUSG00000017943	ganglioside-induced differentiation-associated protein 1-like 1 [Source:MGI Symbol;Acc:MGI:2385163]	overlapping	0	0.637959	0.523825	0.396397	0.452877	0.36976	0.311276
Chr2:163480001-163500000	2	163480001	163500000	R3hdml	ENSMUSG00000078949	R3H domain containing-like [Source:MGI Symbol;Acc:MGI:3650937]	overlapping	0	0.7092	0.383703	0.410338	0.606696	0.595718	0.198575
Chr2:163530001-163580000	2	163530001	163580000	0610008F07Rik	ENSMUSG00000046840	RIKEN cDNA 0610008F07 gene [Source:MGI Symbol;Acc:MGI:1915564]	overlapping	0	0.621982	0.43904	0.500546	0.422866	0.322401	0.356006
Chr2:163660001-163680000	2	163660001	163680000	Pkig	ENSMUSG00000035268	protein kinase inhibitor, gamma [Source:MGI Symbol;Acc:MGI:1343086]	overlapping	0	0.590135	0.558484	0.456265	0.458929	0.414451	0.297861
Chr2:163710001-163750000	2	163710001	163750000	Pkig	ENSMUSG00000035268	protein kinase inhibitor, gamma [Source:MGI Symbol;Acc:MGI:1343086]	overlapping	0	0.721922	0.465639	0.557161	0.45439	0.37818	0.317542
Chr2:163810001-163830000	2	163810001	163830000	Wisp2	ENSMUSG00000027656	WNT1 inducible signaling pathway protein 2 [Source:MGI Symbol;Acc:MGI:1328326]	overlapping	0	0.673729	0.529786	0.529069	0.481159	0.472484	0.493752
Chr2:163850001-163920000	2	163850001	163920000	Kcnk15	ENSMUSG00000035238	potassium channel, subfamily K, member 15 [Source:MGI Symbol;Acc:MGI:2675209]	overlapping	0	0.640442	0.450521	0.481062	0.332993	0.360438	0.366482
Chr2:164050001-164060000	2	164050001	164060000	Pabpc1l	ENSMUSG00000054582	poly(A) binding protein, cytoplasmic 1-like [Source:MGI Symbol;Acc:MGI:1922908]	overlapping	0	0.593937	0.463648	0.284512	0.251694	0.306949	0.461555
Chr2:164180001-164190000	2	164180001	164190000	Wfdc5	ENSMUSG00000040154	WAP four-disulfide core domain 5 [Source:MGI Symbol;Acc:MGI:2384800]	overlapping	0	0.611637	0.399183	0.477919	0.37816	0.364982	0.398925
Chr2:164380001-164440000	2	164380001	164440000	Slpi	ENSMUSG00000017002	secretory leukocyte peptidase inhibitor [Source:MGI Symbol;Acc:MGI:109297]	overlapping	0	0.589074	0.439686	0.411457	0.454339	0.43298	0.36465
Chr2:164460001-164470000	2	164460001	164470000	Sys1	ENSMUSG00000045503	SYS1 Golgi-localized integral membrane protein homolog (S. cerevisiae) [Source:MGI Symbol;Acc:MGI:1913710]	overlapping	0	0.615648	0.520055	0.391292	0.350618	0.526847	0.404311
Chr2:164530001-164540000	2	164530001	164540000	null			Not found	0	0.605691	0.425714	0.52869	1.05185	0.732412	0.325587
Chr2:164560001-164570000	2	164560001	164570000	Wfdc2	ENSMUSG00000017723	WAP four-disulfide core domain 2 [Source:MGI Symbol;Acc:MGI:1914951]	overlapping	0	0.596291	0.419917	0.400261	0.450161	0.526847	0.373896
Chr2:164650001-164660000	2	164650001	164660000	Wfdc9	ENSMUSG00000074594	WAP four-disulfide core domain 9 [Source:MGI Symbol;Acc:MGI:3652032]	overlapping	0	0.572504	0.394565	0.452529	0.216003	0.244021	0.391783
Chr2:164760001-164800000	2	164760001	164800000	Dnttip1	ENSMUSG00000017299	deoxynucleotidyltransferase, terminal, interacting protein 1 [Source:MGI Symbol;Acc:MGI:1923483]	overlapping	0	0.571951	0.478586	0.33902	0.366736	0.450722	0.333645
Chr2:164820001-164860000	2	164820001	164860000	Zswim3	ENSMUSG00000045822	zinc finger, SWIM domain containing 3 [Source:MGI Symbol;Acc:MGI:1914788]	overlapping	0	0.616791	0.410457	0.380281	0.242926	0.40842	0.312611
Chr2:164880001-165010000	2	164880001	165010000	Pcif1	ENSMUSG00000039849	PDX1 C-terminal inhibiting factor 1 [Source:MGI Symbol;Acc:MGI:2443858]	overlapping	0	0.612543	0.465152	0.400196	0.530597	0.489816	0.342654
Chr2:165070001-165330000	2	165070001	165330000	Cd40	ENSMUSG00000017652	CD40 antigen [Source:MGI Symbol;Acc:MGI:88336]	overlapping	0	0.629276	0.450945	0.439789	0.43078	0.449881	0.374994
Chr2:165390001-165490000	2	165390001	165490000	Ocstamp	ENSMUSG00000027670	osteoclast stimulatory transmembrane protein [Source:MGI Symbol;Acc:MGI:1921864]	overlapping	0	0.630625	0.448799	0.451184	0.413727	0.410605	0.305376
Chr2:165510001-165520000	2	165510001	165520000	Slc2a10	ENSMUSG00000027661	solute carrier family 2 (facilitated glucose transporter), member 10 [Source:MGI Symbol;Acc:MGI:2156687]	overlapping	0	0.639017	0.59828	0.527582	0.251694	0.473708	0.336331
Chr2:165550001-165560000	2	165550001	165560000	null			Not found	0	0.709958	0.46247	0.5455	0.224771	0.386658	0.525968
Chr2:165600001-165630000	2	165600001	165630000	Eya2	ENSMUSG00000017897	eyes absent 2 homolog (Drosophila) [Source:MGI Symbol;Acc:MGI:109341]	overlapping	0	0.54752	0.386177	0.469203	0.31785	0.477786	0.38821
Chr2:165680001-165720000	2	165680001	165720000	Eya2	ENSMUSG00000017897	eyes absent 2 homolog (Drosophila) [Source:MGI Symbol;Acc:MGI:109341]	overlapping	0	0.603341	0.382525	0.43078	0.526391	0.505085	0.425773
Chr2:165780001-165790000	2	165780001	165790000	Zmynd8	ENSMUSG00000039671	zinc finger, MYND-type containing 8 [Source:MGI Symbol;Acc:MGI:1918025]	overlapping	0	0.656857	0.371569	0.330804	0.251694	0.309396	0.323794
Chr2:165820001-165830000	2	165820001	165830000	Zmynd8	ENSMUSG00000039671	zinc finger, MYND-type containing 8 [Source:MGI Symbol;Acc:MGI:1918025]	overlapping	0	0.621734	0.533815	0.279285	0.557853	0.468814	0.41682
Chr2:165900001-165910000	2	165900001	165910000	AL589902.1	ENSMUSG00000092796	No description	overlapping	0	0.609981	0.547669	0.316618	0.350618	0.331071	0.148487
Chr2:166090001-166210000	2	166090001	166210000	Sulf2	ENSMUSG00000006800	sulfatase 2 [Source:MGI Symbol;Acc:MGI:1919293]	overlapping	0	0.621226	0.43537	0.415158	0.33199	0.467619	0.406239
Chr2:166240001-166290000	2	166240001	166290000	Gm11468	ENSMUSG00000084840	predicted gene 11468 [Source:MGI Symbol;Acc:MGI:3649218]	overlapping	0	0.579501	0.378741	0.458131	0.363512	0.42777	0.417898
Chr2:166320001-166330000	2	166320001	166330000	null			Not found	0	0.725863	0.326754	0.516748	0.701236	0.635573	0.259399
Chr2:166350001-166430000	2	166350001	166430000	Gm14268	ENSMUSG00000087617	predicted gene 14268 [Source:MGI Symbol;Acc:MGI:3649848]	overlapping	0	0.61717	0.489678	0.481932	0.780277	0.56338	0.341021
Chr2:166460001-166490000	2	166460001	166490000	5031425F14Rik	ENSMUSG00000085129	RIKEN cDNA 5031425F14 gene [Source:MGI Symbol;Acc:MGI:2442533]	upstream	769	0.598686	0.477047	0.515757	0.287798	0.30287	0.431738
Chr2:166520001-166720000	2	166520001	166720000	Prex1	ENSMUSG00000039621iption=phosphatidylinositol-3,4,5-trisphosphate-dependentRac exchange factor 1 [Source:MGI Symbol;Acc:MGI:3040696]	No description	overlapping	0	0.583456	0.445183	0.397044	0.59176	0.603969	0.404482
Chr2:166740001-166750000	2	166740001	166750000	null			Not found	0	0.580247	0.405073	0.471564	0.180312	0.420569	0.363161
Chr2:166840001-166850000	2	166840001	166850000	Arfgef2	ENSMUSG00000074582	ADP-ribosylation factor guanine nucleotide-exchange factor 2 (brefeldin A-inhibited) [Source:MGI Symbol;Acc:MGI:2139354]	overlapping	0	0.611777	0.456768	0.437963	0.49462	0.463919	0.447235
Chr2:166890001-166910000	2	166890001	166910000	Arfgef2	ENSMUSG00000074582	ADP-ribosylation factor guanine nucleotide-exchange factor 2 (brefeldin A-inhibited) [Source:MGI Symbol;Acc:MGI:2139354]	overlapping	0	0.551761	0.433725	0.357132	0.37785	0.443468	0.369429
Chr2:166950001-166960000	2	166950001	166960000	Stau1	ENSMUSG00000039536	staufen (RNA binding protein) homolog 1 (Drosophila) [Source:MGI Symbol;Acc:MGI:1338864]	overlapping	0	0.590344	0.43839	0.331553	0.432006	0.439797	0.373896
Chr2:167000001-167040000	2	167000001	167040000	Ddx27	ENSMUSG00000017999	DEAD (Asp-Glu-Ala-Asp) box polypeptide 27 [Source:MGI Symbol;Acc:MGI:2385884]	overlapping	0	0.587232	0.444952	0.358534	0.344042	0.427124	0.354211
Chr2:167090001-167190000	2	167090001	167190000	Gm14290	ENSMUSG00000086605	predicted gene 14290 [Source:MGI Symbol;Acc:MGI:3649702]	overlapping	0	0.606632	0.433645	0.482956	0.468759	0.457242	0.354932
Chr2:167220001-167230000	2	167220001	167230000	Ptgis	ENSMUSG00000017969	prostaglandin I2 (prostacyclin) synthase [Source:MGI Symbol;Acc:MGI:1097156]	overlapping	0	0.68673	0.45559	0.545131	1.08001	0.594669	0.309483
Chr2:167270001-167300000	2	167270001	167300000	B4galt5	ENSMUSG00000017929	UDP-Gal:betaGlcNAc beta 1,4-galactosyltransferase, polypeptide 5 [Source:MGI Symbol;Acc:MGI:1927169]	overlapping	0	0.532354	0.380805	0.335783	0.584776	0.399593	0.249859
Chr2:167340001-167350000	2	167340001	167350000	B4galt5	ENSMUSG00000017929	UDP-Gal:betaGlcNAc beta 1,4-galactosyltransferase, polypeptide 5 [Source:MGI Symbol;Acc:MGI:1927169]	overlapping	0	0.617724	0.300318	0.350598	0.450161	0.219898	0.230768
Chr2:167380001-167390000	2	167380001	167390000	null			Not found	0	0.61952	0.464826	0.439829	0.278617	0.461472	0.339907
Chr2:167440001-167500000	2	167440001	167500000	Slc9a8	ENSMUSG00000039463	solute carrier family 9 (sodium/hydrogen exchanger), member 8 [Source:MGI Symbol;Acc:MGI:1924281]	overlapping	0	0.633143	0.416689	0.34263	0.31785	0.488158	0.369423
Chr2:167540001-167620000	2	167540001	167620000	Snai1	ENSMUSG00000042821	snail homolog 1 (Drosophila) [Source:MGI Symbol;Acc:MGI:98330]	overlapping	0	0.668924	0.388027	0.410846	0.279945	0.426862	0.229882
Chr2:167640001-167930000	2	167640001	167930000	Gm20431	ENSMUSG00000089739	predicted gene 20431 [Source:MGI Symbol;Acc:MGI:5141896]	overlapping	0	0.637541	0.407318	0.402869	0.459427	0.453937	0.328059
Chr2:167960001-168040000	2	167960001	168040000	Ptpn1	ENSMUSG00000027540	protein tyrosine phosphatase, non-receptor type 1 [Source:MGI Symbol;Acc:MGI:97805]	overlapping	0	0.679519	0.492835	0.435397	0.380197	0.476417	0.341249
Chr2:168110001-168120000	2	168110001	168120000	null			Not found	0	0.660868	0.341692	0.26435	0.234158	0.381763	0.22541
Chr2:168150001-168180000	2	168150001	168180000	Gm14235	ENSMUSG00000085267	predicted gene 14235 [Source:MGI Symbol;Acc:MGI:3702169]	overlapping	0	0.646533	0.487854	0.41768	0.446413	0.36976	0.370315
Chr2:168250001-168300000	2	168250001	168300000	Kcng1	ENSMUSG00000074575	potassium voltage-gated channel, subfamily G, member 1 [Source:MGI Symbol;Acc:MGI:3616086]	overlapping	0	0.596427	0.421077	0.425418	0.505513	0.424344	0.306978
Chr2:168320001-168360000	2	168320001	168360000	SNORA2	ENSMUSG00000064961	Small nucleolar RNA SNORA2/SNORA34 family [Source:RFAM;Acc:RF00410]	overlapping	0	0.605346	0.452126	0.49257	0.384736	0.457364	0.418165
Chr2:168400001-168690000	2	168400001	168690000	Nfatc2	ENSMUSG00000027544	nuclear factor of activated T cells, cytoplasmic, calcineurin dependent 2 [Source:MGI Symbol;Acc:MGI:102463]	overlapping	0	0.613699	0.457769	0.407054	0.551401	0.540686	0.375373
Chr2:168720001-168730000	2	168720001	168730000	Atp9a	ENSMUSG00000027546	ATPase, class II, type 9A [Source:MGI Symbol;Acc:MGI:1330826]	overlapping	0	0.666814	0.513081	0.364415	0.863393	0.572645	0.354218
Chr2:168880001-168890000	2	168880001	168890000	SNORA17	ENSMUSG00000077761	Small nucleolar RNA SNORA17 [Source:RFAM;Acc:RF00560]	overlapping	0	0.617724	0.543051	0.334166	0.34185	0.609003	0.296956
Chr2:168930001-168940000	2	168930001	168940000	Zfp64	ENSMUSG00000027551	zinc finger protein 64 [Source:MGI Symbol;Acc:MGI:107342]	overlapping	0	0.643446	0.394659	0.332301	0.251694	0.248915	0.177118
Chr2:169060001-169090000	2	169060001	169090000	AL772258.1	ENSMUSG00000080415	No description	overlapping	0	0.546137	0.439081	0.494846	0.728778	0.428609	0.348844
Chr2:169300001-169310000	2	169300001	169310000	null			Not found	0	0.607766	0.460208	0.473818	0.34185	0.360088	0.488393
Chr2:169690001-169710000	2	169690001	169710000	Tshz2	ENSMUSG00000047907	teashirt zinc finger family member 2 [Source:MGI Symbol;Acc:MGI:2153084]	overlapping	0	0.710028	0.525804	0.561368	0.346234	0.420569	0.500021
Chr2:169840001-169870000	2	169840001	169870000	Tshz2	ENSMUSG00000047907	teashirt zinc finger family member 2 [Source:MGI Symbol;Acc:MGI:2153084]	overlapping	0	0.529174	0.410713	0.434857	0.449748	0.441428	0.418006
Chr2:169890001-169910000	2	169890001	169910000	Tshz2	ENSMUSG00000047907	teashirt zinc finger family member 2 [Source:MGI Symbol;Acc:MGI:2153084]	overlapping	0	0.594905	0.529197	0.498082	0.4727	0.333518	0.408791
Chr2:170010001-170020000	2	170010001	170020000	Tshz2	ENSMUSG00000047907	teashirt zinc finger family member 2 [Source:MGI Symbol;Acc:MGI:2153084]	overlapping	0	0.615648	0.515343	0.511151	0.314308	0.360088	0.28803
Chr2:170090001-170140000	2	170090001	170140000	Zfp217	ENSMUSG00000052056	zinc finger protein 217 [Source:MGI Symbol;Acc:MGI:2685408]	overlapping	0	0.56382	0.418579	0.317962	0.315051	0.313241	0.33239
Chr2:170210001-170240000	2	170210001	170240000	null			Not found	0	0.568493	0.461716	0.399756	0.776572	0.507503	0.282056
Chr2:170290001-170300000	2	170290001	170300000	null			Not found	0	0.625606	0.402717	0.52459	0.386928	0.548522	0.320219
Chr2:170340001-170350000	2	170340001	170350000	Bcas1	ENSMUSG00000013523	breast carcinoma amplified sequence 1 [Source:MGI Symbol;Acc:MGI:1924210]	overlapping	0	0.647178	0.354369	0.39241	0.476465	0.413227	0.32021
Chr2:170430001-170460000	2	170430001	170460000	null			Not found	0	0.570476	0.482843	0.412083	0.245849	0.476039	0.35362
Chr2:170520001-170580000	2	170520001	170580000	Gm14637	ENSMUSG00000085225	predicted gene 14637 [Source:MGI Symbol;Acc:MGI:3705296]	overlapping	0	0.568101	0.416658	0.470388	0.645826	0.470503	0.279083
Chr2:170610001-170620000	2	170610001	170620000	null			Not found	0	0.57444	0.583248	0.426399	0.440156	0.420569	0.486601
Chr2:170790001-170800000	2	170790001	170800000	Dok5	ENSMUSG00000027560	docking protein 5 [Source:MGI Symbol;Acc:MGI:1924079]	overlapping	0	0.570429	0.381983	0.495846	0.368773	0.466366	0.41148
Chr2:170870001-170880000	2	170870001	170880000	Dok5	ENSMUSG00000027560	docking protein 5 [Source:MGI Symbol;Acc:MGI:1924079]	overlapping	0	0.65506	0.363605	0.408841	0.251694	0.423016	0.313068
Chr2:171730001-171750000	2	171730001	171750000	null			Not found	0	0.633349	0.356089	0.538587	0.314618	0.439797	0.27371
Chr2:171970001-172000000	2	171970001	172000000	Gm14272	ENSMUSG00000085426	predicted gene 14272 [Source:MGI Symbol;Acc:MGI:3651834]	overlapping	0	0.651695	0.399639	0.528069	0.815599	0.486643	0.31903
Chr2:172160001-172170000	2	172160001	172170000	null			Not found	0	0.601819	0.553465	0.414438	0.98924	0.727517	0.372113
Chr2:172230001-172240000	2	172230001	172240000	null			Not found	0	0.601959	0.393481	0.444687	0.296772	0.338413	0.336322
Chr2:172270001-172300000	2	172270001	172300000	Gm14275	ENSMUSG00000085949	predicted gene 14275 [Source:MGI Symbol;Acc:MGI:3649537]	overlapping	0	0.60265	0.480487	0.559681	0.791598	0.629163	0.258808
Chr2:172330001-172350000	2	172330001	172350000	Gm14273	ENSMUSG00000085905	predicted gene 14273 [Source:MGI Symbol;Acc:MGI:3649600]	overlapping	0	0.671793	0.464779	0.459996	0.503698	0.408507	0.257612
Chr2:172430001-172550000	2	172430001	172550000	Cass4	ENSMUSG00000074570	Cas scaffolding protein family member 4 [Source:MGI Symbol;Acc:MGI:2444482]	overlapping	0	0.610267	0.459324	0.400878	0.357555	0.452936	0.309041
Chr2:172570001-172590000	2	172570001	172590000	null			Not found	0	0.706296	0.425714	0.532052	0.274233	0.40239	0.255824
Chr2:172630001-172730000	2	172630001	172730000	null			Not found	0	0.61504	0.439139	0.473657	0.405774	0.384945	0.388206
Chr2:172760001-172790000	2	172760001	172790000	null			Not found	0	0.666861	0.467873	0.4361	0.404258	0.474524	0.446649
Chr2:172820001-172940000	2	172820001	172940000	AL845460.1	ENSMUSG00000093160	No description	overlapping	0	0.661214	0.467956	0.464348	0.432582	0.457335	0.385968
Chr2:172980001-173090000	2	172980001	173090000	Spo11	ENSMUSG00000005883	sporulation protein, meiosis-specific, SPO11 homolog (S. cerevisiae) [Source:MGI Symbol;Acc:MGI:1349669]	overlapping	0	0.657838	0.490448	0.384878	0.459557	0.566797	0.36804
Chr2:173110001-173120000	2	173110001	173120000	Ctcfl	ENSMUSG00000070495	CCCTC-binding factor (zinc finger protein)-like [Source:MGI Symbol;Acc:MGI:3652571]	overlapping	0	0.607627	0.476324	0.342008	0.593544	0.444691	0.46513
Chr2:173150001-173470000	2	173150001	173470000	Pck1	ENSMUSG00000027513	phosphoenolpyruvate carboxykinase 1, cytosolic [Source:MGI Symbol;Acc:MGI:97501]	overlapping	0	0.648345	0.467742	0.494124	0.52027	0.47173	0.351084
Chr2:173510001-173600000	2	173510001	173600000	1700021F07Rik	ENSMUSG00000027518	RIKEN cDNA 1700021F07 gene [Source:MGI Symbol;Acc:MGI:1919471]	overlapping	0	0.638741	0.488456	0.480696	0.489818	0.478253	0.346461
Chr2:173680001-173690000	2	173680001	173690000	Rab22a	ENSMUSG00000027519	RAB22A, member RAS oncogene family [Source:MGI Symbol;Acc:MGI:105072]	overlapping	0	0.578312	0.429154	0.392789	0.458929	0.268143	0.413245
Chr2:173730001-173750000	2	173730001	173750000	Vapb	ENSMUSG00000054455	vesicle-associated membrane protein, associated protein B and C [Source:MGI Symbol;Acc:MGI:1928744]	overlapping	0	0.612675	0.425125	0.425083	0.417926	0.332295	0.356892
Chr2:173790001-173800000	2	173790001	173800000	null			Not found	0	0.615788	0.432594	0.499199	0.296772	0.364982	0.275512
Chr2:173850001-173860000	2	173850001	173860000	null			Not found	0	0.621595	0.477408	0.581716	0.395696	0.309396	0.261192
Chr2:174010001-174020000	2	174010001	174020000	null			Not found	0	0.729734	0.467088	0.592919	0.440156	0.309396	0.416829
Chr2:174110001-174130000	2	174110001	174130000	Npepl1	ENSMUSG00000039263	aminopeptidase-like 1 [Source:MGI Symbol;Acc:MGI:2448523]	overlapping	0	0.893948	0.55568	0.647985	0.890316	0.622288	0.353308
Chr2:174260001-174300000	2	174260001	174300000	Mir296	ENSMUSG00000065521	microRNA 296 [Source:MGI Symbol;Acc:MGI:3619269]	overlapping	0	0.615718	0.512833	0.497992	0.599966	0.618005	0.458866
Chr2:174420001-174450000	2	174420001	174450000	Th1l	ENSMUSG00000016253	TH1-like homolog (Drosophila) [Source:MGI Symbol;Acc:MGI:1926424]	overlapping	0	0.812244	0.480126	0.511523	0.458517	0.493868	0.401318
Chr2:174480001-174490000	2	174480001	174490000	null			Not found	0	0.584119	0.541873	0.626151	0.773856	0.434903	0.565307
Chr2:174530001-174570000	2	174530001	174570000	null			Not found	0	0.586504	0.458735	0.579476	0.409312	0.415674	0.478995
Chr2:174600001-174650000	2	174600001	174650000	Zfp831	ENSMUSG00000050600	zinc finger protein 831 [Source:MGI Symbol;Acc:MGI:3641861]	overlapping	0	0.623144	0.500442	0.628983	0.498375	0.513772	0.5349
Chr2:174670001-174680000	2	174670001	174680000	Zfp831	ENSMUSG00000050600	zinc finger protein 831 [Source:MGI Symbol;Acc:MGI:3641861]	overlapping	0	0.607766	0.583248	0.633605	0.530311	0.553417	0.431122
Chr2:174760001-174910000	2	174760001	174910000	Edn3	ENSMUSG00000027524	endothelin 3 [Source:MGI Symbol;Acc:MGI:95285]	overlapping	0	0.606448	0.514966	0.573154	0.520498	0.3754	0.441514
Chr2:178110001-178160000	2	178110001	178160000	Phactr3	ENSMUSG00000027525	phosphatase and actin regulator 3 [Source:MGI Symbol;Acc:MGI:1921439]	overlapping	0	0.592859	0.510131	0.52892	0.546836	0.554396	0.443301
Chr2:178200001-178210000	2	178200001	178210000	Phactr3	ENSMUSG00000027525	phosphatase and actin regulator 3 [Source:MGI Symbol;Acc:MGI:1921439]	overlapping	0	0.57444	0.663829	0.557064	0.620467	0.531741	0.508063
Chr2:178240001-178280000	2	178240001	178280000	Phactr3	ENSMUSG00000027525	phosphatase and actin regulator 3 [Source:MGI Symbol;Acc:MGI:1921439]	overlapping	0	0.704186	0.533862	0.582554	0.692777	0.564953	0.429346
Chr2:178300001-178330000	2	178300001	178330000	Phactr3	ENSMUSG00000027525	phosphatase and actin regulator 3 [Source:MGI Symbol;Acc:MGI:1921439]	overlapping	0	0.688433	0.582195	0.494227	0.620673	0.542113	0.426961
Chr2:178490001-178510000	2	178490001	178510000	null			Not found	0	0.629408	0.503892	0.628566	0.337466	0.344356	0.355114
Chr2:178530001-178540000	2	178530001	178540000	null			Not found	0	0.733466	0.532731	0.473439	0.566621	0.326177	0.389982
Chr2:178560001-178640000	2	178560001	178640000	null			Not found	0	0.550533	0.483352	0.494486	0.3856	0.426512	0.450148
Chr2:178670001-178790000	2	178670001	178790000	null			Not found	0	0.568828	0.438826	0.534699	0.425696	0.471436	0.310534
Chr2:178810001-178820000	2	178810001	178820000	null			Not found	0	0.603894	0.491262	0.584329	0.701236	0.38421	0.313077
Chr2:178840001-178850000	2	178840001	178850000	null			Not found	0	0.66875	0.486739	0.636976	0.233539	0.248915	0.493752
Chr2:178910001-178980000	2	178910001	178980000	null			Not found	0	0.541528	0.467775	0.599528	0.536117	0.399443	0.484302
Chr2:179010001-179030000	2	179010001	179030000	null			Not found	0	0.63729	0.531506	0.583018	0.274233	0.48944	0.41773
Chr2:179080001-179110000	2	179080001	179110000	null			Not found	0	0.563192	0.472853	0.585324	0.656571	0.539666	0.382239
Chr2:179220001-179240000	2	179220001	179240000	null			Not found	0	0.761264	0.498731	0.617187	0.544391	0.430183	0.342577
Chr2:179280001-179340000	2	179280001	179340000	null			Not found	0	0.598962	0.465564	0.514693	0.512466	0.548639	0.293092
Chr2:179370001-179410000	2	179370001	179410000	null			Not found	0	0.658897	0.463625	0.573502	0.409467	0.41751	0.457085
Chr2:179430001-179450000	2	179430001	179450000	Cdh4	ENSMUSG00000000305	cadherin 4 [Source:MGI Symbol;Acc:MGI:99218]	overlapping	0	0.599884	0.529739	0.540831	0.476465	0.43263	0.421306
Chr2:179470001-179580000	2	179470001	179580000	Cdh4	ENSMUSG00000000305	cadherin 4 [Source:MGI Symbol;Acc:MGI:99218]	overlapping	0	0.598866	0.459797	0.465359	0.469404	0.46732	0.356658
Chr2:179690001-179780000	2	179690001	179780000	Cdh4	ENSMUSG00000000305	cadherin 4 [Source:MGI Symbol;Acc:MGI:99218]	overlapping	0	0.629877	0.481141	0.440042	0.395696	0.403555	0.389394
Chr2:179820001-179830000	2	179820001	179830000	Cdh4	ENSMUSG00000000305	cadherin 4 [Source:MGI Symbol;Acc:MGI:99218]	overlapping	0	0.725863	0.507473	0.508528	0.818315	0.529294	0.407895
Chr2:179860001-179890000	2	179860001	179890000	Cdh4	ENSMUSG00000000305	cadherin 4 [Source:MGI Symbol;Acc:MGI:99218]	overlapping	0	0.68069	0.508525	0.384451	0.360005	0.503424	0.402512
Chr2:179930001-179940000	2	179930001	179940000	Taf4a	ENSMUSG00000039117	TAF4A RNA polymerase II, TATA box binding protein (TBP)-associated factor [Source:MGI Symbol;Acc:MGI:2152346]	overlapping	0	0.572504	0.322136	0.344991	0.251694	0.362535	0.429357
Chr2:179960001-179990000	2	179960001	179990000	Taf4a	ENSMUSG00000039117	TAF4A RNA polymerase II, TATA box binding protein (TBP)-associated factor [Source:MGI Symbol;Acc:MGI:2152346]	overlapping	0	0.55531	0.310245	0.395027	0.437645	0.388289	0.350036
Chr2:180030001-180040000	2	180030001	180040000	Lsm14b	ENSMUSG00000039108	LSM14 homolog B (SCD6, S. cerevisiae) [Source:MGI Symbol;Acc:MGI:3040677]	overlapping	0	0.584119	0.265824	0.364415	0.495238	0.333518	0.348841
Chr2:180080001-180550000	2	180080001	180550000	Gtpbp5	ENSMUSG00000039069	GTP binding protein 5 [Source:MGI Symbol;Acc:MGI:106565]	overlapping	0	0.652677	0.487104	0.462822	0.439255	0.456607	0.345305
Chr2:180590001-180620000	2	180590001	180620000	Ogfr	ENSMUSG00000049401	opioid growth factor receptor [Source:MGI Symbol;Acc:MGI:1919325]	overlapping	0	0.711987	0.495127	0.378349	0.251694	0.534888	0.269534
Chr2:180650001-180670000	2	180650001	180670000	Dido1	ENSMUSG00000038914	death inducer-obliterator 1 [Source:MGI Symbol;Acc:MGI:1344352]	overlapping	0	0.602996	0.386601	0.447486	0.463004	0.403613	0.470502
Chr2:180730001-180840000	2	180730001	180840000	Slc17a9	ENSMUSG00000023393	solute carrier family 17, member 9 [Source:MGI Symbol;Acc:MGI:1919107]	overlapping	0	0.596716	0.52598	0.466512	0.366382	0.437636	0.420895
Chr2:180870001-180900000	2	180870001	180900000	Gm14342	ENSMUSG00000086166	predicted gene 14342 [Source:MGI Symbol;Acc:MGI:3650757]	overlapping	0	0.683916	0.480911	0.531058	0.443491	0.351231	0.391777
Chr2:180920001-180950000	2	180920001	180950000	Ythdf1	ENSMUSG00000038848	YTH domain family 1 [Source:MGI Symbol;Acc:MGI:1917431]	overlapping	0	0.669302	0.490116	0.603119	0.422825	0.425347	0.358388
Chr2:180970001-181050000	2	180970001	181050000	Arfgap1	ENSMUSG00000027575	ADP-ribosylation factor GTPase activating protein 1 [Source:MGI Symbol;Acc:MGI:2183559]	overlapping	0	0.624793	0.567608	0.43087	0.416198	0.408726	0.45574
Chr2:181070001-181160000	2	181070001	181160000	Kcnq2	ENSMUSG00000016346	potassium voltage-gated channel, subfamily Q, member 2 [Source:MGI Symbol;Acc:MGI:1309503]	overlapping	0	0.68367	0.501221	0.565288	0.509852	0.521215	0.477451
Chr2:181180001-181240000	2	181180001	181240000	U6	ENSMUSG00000084696	U6 spliceosomal RNA [Source:RFAM;Acc:RF00026]	overlapping	0	0.722244	0.546884	0.487377	0.471032	0.379432	0.287729
Chr2:181300001-181310000	2	181300001	181310000	Stmn3	ENSMUSG00000027581	stathmin-like 3 [Source:MGI Symbol;Acc:MGI:1277137]	overlapping	0	0.590344	0.461292	0.433862	0.728159	0.413227	0.502695
Chr2:181350001-181390000	2	181350001	181390000	Rtel1	ENSMUSG00000038685	regulator of telomere elongation helicase 1 [Source:MGI Symbol;Acc:MGI:2139369]	overlapping	0	0.535996	0.451584	0.376547	0.485852	0.40842	0.398941
Chr2:181460001-181490000	2	181460001	181490000	Zbtb46	ENSMUSG00000027583	zinc finger and BTB domain containing 46 [Source:MGI Symbol;Acc:MGI:1919397]	downstream	575	0.569092	0.457883	0.546242	0.686623	0.613082	0.281465
Chr2:181570001-181600000	2	181570001	181600000	Uckl1	ENSMUSG00000089917	uridine-cytidine kinase 1-like 1 [Source:MGI Symbol;Acc:MGI:1915806]	overlapping	0	0.652433	0.416902	0.481524	0.60857	0.526031	0.298153
Chr2:181650001-181700000	2	181650001	181700000	Prpf6	ENSMUSG00000002455	PRP6 pre-mRNA splicing factor 6 homolog (yeast) [Source:MGI Symbol;Acc:MGI:1922946]	overlapping	0	0.650192	0.492422	0.449466	0.354373	0.525449	0.264414
Chr2:181760001-181770000	2	181760001	181770000	Myt1	ENSMUSG00000010505	myelin transcription factor 1 [Source:MGI Symbol;Acc:MGI:1100535]	overlapping	0	0.586054	0.473968	0.559687	0.242926	0.306949	0.41682
Chr2:181800001-181810000	2	181800001	181810000	Myt1	ENSMUSG00000010505	myelin transcription factor 1 [Source:MGI Symbol;Acc:MGI:1100535]	overlapping	0	0.588409	0.444186	0.585078	0.224771	0.309396	0.323803
Chr3:6860001-6870000	3	6860001	6870000	null			Not found	0	0.586194	0.348572	0.359566	1.37617	0.768421	0.259408
Chr3:8220001-8230000	3	8220001	8230000	null			Not found	0	0.63307	0.437306	0.420045	0.881548	0.698501	0.490177
Chr3:8560001-8570000	3	8560001	8570000	Stmn2	ENSMUSG00000027500	stathmin-like 2 [Source:MGI Symbol;Acc:MGI:98241]	overlapping	0	0.659071	0.558083	0.56268	0.701855	0.335965	0.41682
Chr3:8600001-8610000	3	8600001	8610000	null			Not found	0	0.63722	0.404979	0.334915	0.233539	0.362535	0.220033
Chr3:8630001-8640000	3	8630001	8640000	null			Not found	0	0.568493	0.415394	0.377854	0.648009	0.780657	0.34885
Chr3:8670001-8700000	3	8670001	8700000	SNORA17	ENSMUSG00000088094	Small nucleolar RNA SNORA17 [Source:RFAM;Acc:RF00560]	overlapping	0	0.513456	0.454836	0.364286	0.401542	0.583249	0.394173
Chr3:8730001-8750000	3	8730001	8750000	null			Not found	0	0.59228	0.472837	0.465034	0.238233	0.302054	0.342582
Chr3:8960001-8980000	3	8960001	8980000	Tpd52	ENSMUSG00000027506	tumor protein D52 [Source:MGI Symbol;Acc:MGI:107749]	overlapping	0	0.637499	0.443503	0.425268	0.440465	0.428959	0.27639
Chr3:9000001-9010000	3	9000001	9010000	Tpd52	ENSMUSG00000027506	tumor protein D52 [Source:MGI Symbol;Acc:MGI:107749]	overlapping	0	0.584258	0.511903	0.386813	0.422619	0.273038	0.289805
Chr3:9080001-9090000	3	9080001	9090000	null			Not found	0	0.607766	0.308376	0.572747	0.611699	0.722623	0.449036
Chr3:9120001-9130000	3	9120001	9130000	null			Not found	0	0.615648	0.453234	0.433114	0.242926	0.439797	0.239739
Chr3:9180001-9200000	3	9180001	9200000	null			Not found	0	0.642339	0.503939	0.438522	0.278617	0.279155	0.281757
Chr3:9350001-9360000	3	9350001	9360000	null			Not found	0	0.656717	0.410775	0.409211	0.314927	0.306949	0.295181
Chr3:9460001-9490000	3	9460001	9490000	Zfp704	ENSMUSG00000040209	zinc finger protein 704 [Source:MGI Symbol;Acc:MGI:2180715]	overlapping	0	0.678568	0.471345	0.43647	0.602518	0.502725	0.449018
Chr3:9550001-9560000	3	9550001	9560000	Zfp704	ENSMUSG00000040209	zinc finger protein 704 [Source:MGI Symbol;Acc:MGI:2180715]	overlapping	0	0.578312	0.390041	0.36702	0.521543	0.381763	0.445451
Chr3:9580001-9590000	3	9580001	9590000	Zfp704	ENSMUSG00000040209	zinc finger protein 704 [Source:MGI Symbol;Acc:MGI:2180715]	overlapping	0	0.621595	0.495881	0.448788	0.764469	0.526847	0.316652
Chr3:9620001-9630000	3	9620001	9630000	null			Not found	0	0.603755	0.394659	0.50741	0.45831	0.277932	0.348841
Chr3:9660001-9670000	3	9660001	9670000	null			Not found	0	0.66875	0.421096	0.425272	0.512775	0.555864	0.255833
Chr3:9690001-9720000	3	9690001	9720000	Pag1	ENSMUSG00000027508	phosphoprotein associated with glycosphingolipid microdomains 1 [Source:MGI Symbol;Acc:MGI:2443160]	overlapping	0	0.674098	0.545376	0.394778	0.368773	0.542113	0.470489
Chr3:9820001-9830000	3	9820001	9830000	Pag1	ENSMUSG00000027508	phosphoprotein associated with glycosphingolipid microdomains 1 [Source:MGI Symbol;Acc:MGI:2443160]	overlapping	0	0.574301	0.43495	0.345739	0.269849	0.381763	0.46513
Chr3:9860001-9870000	3	9860001	9870000	null			Not found	0	0.648835	0.503939	0.510024	0.584157	0.502725	0.309483
Chr3:9970001-9980000	3	9970001	9980000	null			Not found	0	0.594076	0.478586	0.564536	0.72001	0.304502	0.259408
Chr3:10020001-10030000	3	10020001	10030000	null			Not found	0	0.578451	0.342871	0.38794	0.125847	0.277932	0.348841
Chr3:10080001-10090000	3	10080001	10090000	Gm9833	ENSMUSG00000049230	predicted gene 9833 [Source:MGI Symbol;Acc:MGI:3641855]	overlapping	0	0.73167	0.431416	0.620545	0.638622	0.413227	0.332729
Chr3:10290001-10300000	3	10290001	10300000	Fabp12	ENSMUSG00000027530	fatty acid binding protein 12 [Source:MGI Symbol;Acc:MGI:1922747]	overlapping	0	0.584258	0.345227	0.468212	0.216003	0.444691	0.379264
Chr3:10320001-10330000	3	10320001	10330000	Impa1	ENSMUSG00000027531	inositol (myo)-1(or 4)-monophosphatase 1 [Source:MGI Symbol;Acc:MGI:1933158]	overlapping	0	0.692258	0.365867	0.465598	0.216003	0.326177	0.522392
Chr3:10390001-10400000	3	10390001	10400000	Chmp4c	ENSMUSG00000027536	charged multivesicular body protein 4C [Source:MGI Symbol;Acc:MGI:1913621]	overlapping	0	0.674836	0.398005	0.483507	0.333082	0.531741	0.339889
Chr3:14340001-14350000	3	14340001	14350000	null			Not found	0	0.619659	0.548753	0.594776	0.179693	0.275485	0.543836
Chr3:14880001-14890000	3	14880001	14890000	Car2	ENSMUSG00000027562	carbonic anhydrase 2 [Source:MGI Symbol;Acc:MGI:88269]	overlapping	0	0.607905	0.324398	0.369634	0.251694	0.338413	0.381047
Chr3:16040001-16050000	3	16040001	16050000	null			Not found	0	0.61952	0.570571	0.535036	0.386928	0.222346	0.305899
Chr3:16080001-16090000	3	16080001	16090000	null			Not found	0	0.640952	0.436034	0.477171	0.251694	0.217451	0.266559
Chr3:16110001-16130000	3	16110001	16130000	RNaseP_nuc	ENSMUSG00000088874	Nuclear RNase P [Source:RFAM;Acc:RF00009]	overlapping	0	0.676702	0.48959	0.591982	0.386619	0.340685	0.505384
Chr3:16340001-16350000	3	16340001	16350000	null			Not found	0	0.62367	0.525851	0.55446	0.476465	0.415674	0.255815
Chr3:18610001-18620000	3	18610001	18620000	null			Not found	0	0.574301	0.442914	0.499569	0.936012	0.526847	0.549204
Chr3:19160001-19190000	3	19160001	19190000	Armc1	ENSMUSG00000027599	armadillo repeat containing 1 [Source:MGI Symbol;Acc:MGI:1921502]	overlapping	0	0.54752	0.503122	0.422779	0.279029	0.401924	0.2922
Chr3:19270001-19280000	3	19270001	19280000	Pde7a	ENSMUSG00000069094	phosphodiesterase 7A [Source:MGI Symbol;Acc:MGI:1202402]	overlapping	0	0.603894	0.449888	0.560805	0.602931	0.531741	0.377454
Chr3:19480001-19490000	3	19480001	19490000	null			Not found	0	0.588269	0.360071	0.477171	0.432006	0.379316	0.457979
Chr3:19510001-19540000	3	19510001	19540000	Dnajc5b	ENSMUSG00000027606	DnaJ (Hsp40) homolog, subfamily C, member 5 beta [Source:MGI Symbol;Acc:MGI:1913576]	overlapping	0	0.611085	0.504237	0.524713	0.31785	0.385026	0.351837
Chr3:19610001-19660000	3	19610001	19660000	Dnajc5b	ENSMUSG00000027606	DnaJ (Hsp40) homolog, subfamily C, member 5 beta [Source:MGI Symbol;Acc:MGI:1913576]	overlapping	0	0.523162	0.456985	0.514356	0.334464	0.362046	0.427911
Chr3:19690001-19700000	3	19690001	19700000	Trim55	ENSMUSG00000060913	tripartite motif-containing 55 [Source:MGI Symbol;Acc:MGI:3036269]	overlapping	0	0.670965	0.404979	0.492845	0.162157	0.299607	0.398934
Chr3:19740001-19750000	3	19740001	19750000	null			Not found	0	0.627542	0.533815	0.623528	0.422619	0.452033	0.327397
Chr3:19840001-19850000	3	19840001	19850000	null			Not found	0	0.578312	0.330194	0.49883	0.908471	0.553417	0.454395
Chr3:19880001-19890000	3	19880001	19890000	null			Not found	0	0.582183	0.272704	0.498451	0.350618	0.331071	0.31486
Chr3:20130001-20140000	3	20130001	20140000	Gyg	ENSMUSG00000019528	glycogenin [Source:MGI Symbol;Acc:MGI:1351614]	overlapping	0	0.586333	0.578724	0.464841	0.386928	0.439797	0.432933
Chr3:20170001-20180000	3	20170001	20180000	null			Not found	0	0.609981	0.354369	0.447301	0.728159	0.413227	0.393575
Chr3:20600001-20610000	3	20600001	20610000	null			Not found	0	0.586194	0.357809	0.563419	0.404464	0.667037	0.348841
Chr3:21150001-21160000	3	21150001	21160000	null			Not found	0	0.706366	0.30258	0.560057	0.862775	0.662142	0.423998
Chr3:21440001-21450000	3	21440001	21450000	null			Not found	0	0.619659	0.430238	0.509655	0.377541	0.306949	0.314851
Chr3:21490001-21510000	3	21490001	21510000	null			Not found	0	0.664669	0.516615	0.604303	0.454235	0.344356	0.343473
Chr3:21720001-21730000	3	21720001	21730000	null			Not found	0	0.570569	0.483204	0.600382	0.782006	0.642914	0.518799
Chr3:21840001-21870000	3	21840001	21870000	null			Not found	0	0.577666	0.483204	0.504553	0.40467	0.46322	0.391786
Chr3:21940001-21990000	3	21940001	21990000	null			Not found	0	0.551428	0.493364	0.554903	0.296896	0.344636	0.389987
Chr3:22100001-22110000	3	22100001	22110000	Tbl1xr1	ENSMUSG00000027630	transducin (beta)-like 1X-linked receptor 1 [Source:MGI Symbol;Acc:MGI:2441730]	overlapping	0	0.57444	0.367045	0.505544	0.323695	0.391552	0.289805
Chr3:22220001-22230000	3	22220001	22230000	null			Not found	0	0.698344	0.536171	0.444308	0.683082	0.92574	0.411462
Chr3:22300001-22310000	3	22300001	22310000	null			Not found	0	0.625606	0.468266	0.482408	0.30554	0.41078	0.398925
Chr3:26680001-26690000	3	26680001	26690000	Spata16	ENSMUSG00000039335	spermatogenesis associated 16 [Source:MGI Symbol;Acc:MGI:1918112]	overlapping	0	0.613852	0.475146	0.54139	0.233539	0.452033	0.379246
Chr3:26810001-26840000	3	26810001	26840000	Spata16	ENSMUSG00000039335	spermatogenesis associated 16 [Source:MGI Symbol;Acc:MGI:1918112]	overlapping	0	0.625559	0.501253	0.472322	0.464568	0.458442	0.45737
Chr3:26890001-26900000	3	26890001	26900000	Spata16	ENSMUSG00000039335	spermatogenesis associated 16 [Source:MGI Symbol;Acc:MGI:1918112]	overlapping	0	0.652985	0.45559	0.404362	0.728778	0.476155	0.347076
Chr3:26930001-26940000	3	26930001	26940000	Spata16	ENSMUSG00000039335	spermatogenesis associated 16 [Source:MGI Symbol;Acc:MGI:1918112]	overlapping	0	0.704012	0.421096	0.563049	0.521543	0.616345	0.359585
Chr3:27070001-27080000	3	27070001	27080000	null			Not found	0	0.594216	0.49244	0.538776	0.549085	0.38421	0.232579
Chr3:27160001-27220000	3	27160001	27220000	Nceh1	ENSMUSG00000027698	arylacetamide deacetylase-like 1 [Source:MGI Symbol;Acc:MGI:2443191]	overlapping	0	0.578381	0.488168	0.464351	0.370234	0.456752	0.316056
Chr3:27250001-27280000	3	27250001	27280000	Nceh1	ENSMUSG00000027698	arylacetamide deacetylase-like 1 [Source:MGI Symbol;Acc:MGI:2443191]	overlapping	0	0.574254	0.428761	0.486007	0.2519	0.264997	0.327367
Chr3:27300001-27310000	3	27300001	27310000	null			Not found	0	0.633628	0.44183	0.408102	1.18771	0.604109	0.24689
Chr3:27330001-27350000	3	27330001	27350000	Tnfsf10	ENSMUSG00000039304	tumor necrosis factor (ligand) superfamily, member 10 [Source:MGI Symbol;Acc:MGI:107414]	overlapping	0	0.619659	0.367587	0.44338	0.382235	0.476155	0.352421
Chr3:27380001-27390000	3	27380001	27390000	Ghsr	ENSMUSG00000051136	growth hormone secretagogue receptor [Source:MGI Symbol;Acc:MGI:2441906]	upstream	1991	0.741488	0.398099	0.666846	0.134615	0.623686	0.506271
Chr3:27430001-27440000	3	27430001	27440000	Fndc3b	ENSMUSG00000039286	fibronectin type III domain containing 3B [Source:MGI Symbol;Acc:MGI:1919257]	overlapping	0	0.596152	0.391219	0.411464	0.278617	0.306949	0.357811
Chr3:27460001-27480000	3	27460001	27480000	Fndc3b	ENSMUSG00000039286	fibronectin type III domain containing 3B [Source:MGI Symbol;Acc:MGI:1919257]	overlapping	0	0.60583	0.463059	0.356948	0.525927	0.588551	0.429353
Chr3:27500001-27510000	3	27500001	27510000	Fndc3b	ENSMUSG00000039286	fibronectin type III domain containing 3B [Source:MGI Symbol;Acc:MGI:1919257]	overlapping	0	0.63736	0.599364	0.377106	0.386928	0.386658	0.534875
Chr3:27610001-27640000	3	27610001	27640000	Fndc3b	ENSMUSG00000039286	fibronectin type III domain containing 3B [Source:MGI Symbol;Acc:MGI:1919257]	overlapping	0	0.629937	0.422603	0.436347	0.440774	0.297276	0.260597
Chr3:27660001-27700000	3	27660001	27700000	Fndc3b	ENSMUSG00000039286	fibronectin type III domain containing 3B [Source:MGI Symbol;Acc:MGI:1919257]	overlapping	0	0.571536	0.42999	0.361891	0.337311	0.421705	0.377913
Chr3:27730001-27790000	3	27730001	27790000	null			Not found	0	0.588269	0.435672	0.513575	0.34926	0.345172	0.41981
Chr3:27820001-27830000	3	27820001	27830000	null			Not found	0	0.582044	0.564869	0.641825	0.656777	0.505172	0.601071
Chr3:27860001-27900000	3	27860001	27900000	Tmem212	ENSMUSG00000043164	transmembrane protein 212 [Source:MGI Symbol;Acc:MGI:2685410]	overlapping	0	0.602787	0.501335	0.574805	0.308196	0.2948	0.300542
Chr3:28140001-28160000	3	28140001	28160000	null			Not found	0	0.623531	0.384245	0.571071	0.530621	0.471261	0.322007
Chr3:28210001-28280000	3	28210001	28280000	Tnik	ENSMUSG00000027692	TRAF2 and NCK interacting kinase [Source:MGI Symbol;Acc:MGI:1916264]	overlapping	0	0.588703	0.479105	0.551521	0.341938	0.388455	0.45976
Chr3:28320001-28330000	3	28320001	28330000	Tnik	ENSMUSG00000027692	TRAF2 and NCK interacting kinase [Source:MGI Symbol;Acc:MGI:1916264]	overlapping	0	0.714248	0.417656	0.411834	0.270467	0.357641	0.207523
Chr3:28390001-28400000	3	28390001	28400000	Tnik	ENSMUSG00000027692	TRAF2 and NCK interacting kinase [Source:MGI Symbol;Acc:MGI:1916264]	overlapping	0	0.633349	0.413037	0.54139	0.404464	0.362535	0.338123
Chr3:28570001-28580000	3	28570001	28580000	Tnik	ENSMUSG00000027692	TRAF2 and NCK interacting kinase [Source:MGI Symbol;Acc:MGI:1916264]	overlapping	0	0.625467	0.518877	0.435349	0.296772	0.277932	0.411453
Chr3:28690001-28720000	3	28690001	28720000	Slc2a2	ENSMUSG00000027690	solute carrier family 2 (facilitated glucose transporter), member 2 [Source:MGI Symbol;Acc:MGI:1095438]	overlapping	0	0.557338	0.486676	0.460493	0.459135	0.459141	0.31187
Chr3:28780001-28790000	3	28780001	28790000	1700112D23Rik	ENSMUSG00000091329	RIKEN cDNA 1700112D23 gene [Source:MGI Symbol;Acc:MGI:1920861]	overlapping	0	0.648974	0.438296	0.465598	0.179693	0.558311	0.370321
Chr3:28820001-28840000	3	28820001	28840000	null			Not found	0	0.587301	0.5488	0.574253	0.462695	0.415674	0.366732
Chr3:29810001-29820000	3	29810001	29820000	null			Not found	0	0.57444	0.354369	0.342377	0.15277	0.215004	0.311276
Chr3:30150001-30160000	3	30150001	30160000	Mecom	ENSMUSG00000027684	MDS1 and EVI1 complex locus [Source:MGI Symbol;Acc:MGI:95457]	overlapping	0	0.576376	0.338252	0.446183	0.269849	0.444691	0.42398
Chr3:30430001-30460000	3	30430001	30460000	Mecom	ENSMUSG00000027684	MDS1 and EVI1 complex locus [Source:MGI Symbol;Acc:MGI:95457]	overlapping	0	0.54148	0.392727	0.43473	0.308875	0.323846	0.366739
Chr3:30530001-30550000	3	30530001	30550000	Mecom	ENSMUSG00000027684	MDS1 and EVI1 complex locus [Source:MGI Symbol;Acc:MGI:95457]	overlapping	0	0.626574	0.546444	0.587867	0.723775	0.456752	0.419504
Chr3:30640001-30650000	3	30640001	30650000	Lrrc34	ENSMUSG00000027702	leucine rich repeat containing 34 [Source:MGI Symbol;Acc:MGI:1919077]	overlapping	0	0.568493	0.43495	0.447301	0.188461	0.302054	0.343482
Chr3:30680001-30700000	3	30680001	30700000	Lrrc31	ENSMUSG00000074653	leucine rich repeat containing 31 [Source:MGI Symbol;Acc:MGI:2443864]	overlapping	0	0.577344	0.475146	0.471195	0.238233	0.419345	0.267451
Chr3:30770001-30780000	3	30770001	30780000	null			Not found	0	0.684654	0.416477	0.545122	0.288004	0.275485	0.407895
Chr3:30850001-30870000	3	30850001	30870000	Gpr160	ENSMUSG00000037661	G protein-coupled receptor 160 [Source:MGI Symbol;Acc:MGI:1919112]	overlapping	0	0.607905	0.520055	0.429189	0.229464	0.358864	0.3721
Chr3:31060001-31070000	3	31060001	31070000	null			Not found	0	0.599884	0.422274	0.36665	0.224771	0.275485	0.318427
Chr3:31110001-31120000	3	31110001	31120000	Skil	ENSMUSG00000027660	SKI-like [Source:MGI Symbol;Acc:MGI:106203]	overlapping	0	0.572365	0.473968	0.425272	0.279236	0.222346	0.257616
Chr3:31150001-31160000	3	31150001	31160000	Cldn11	ENSMUSG00000037625	claudin 11 [Source:MGI Symbol;Acc:MGI:106925]	overlapping	0	0.641371	0.477502	0.498072	0.125847	0.326177	0.470471
Chr3:31210001-31270000	3	31210001	31270000	Slc7a14	ENSMUSG00000069072	solute carrier family 7 (cationic amino acid transporter, y+ system), member 14 [Source:MGI Symbol;Acc:MGI:3040688]	overlapping	0	0.611707	0.527705	0.501316	0.292491	0.319418	0.35868
Chr3:31310001-31320000	3	31310001	31320000	Slc7a14	ENSMUSG00000069072	solute carrier family 7 (cationic amino acid transporter, y+ system), member 14 [Source:MGI Symbol;Acc:MGI:3040688]	overlapping	0	0.68659	0.530375	0.646304	0.557234	0.418121	0.449018
Chr3:31440001-31460000	3	31440001	31460000	null			Not found	0	0.621595	0.386601	0.464102	0.828011	0.382987	0.304129
Chr3:31490001-31500000	3	31490001	31500000	null			Not found	0	0.713969	0.480942	0.573505	0.936012	0.558311	0.263002
Chr3:31710001-31720000	3	31710001	31720000	null			Not found	0	0.584119	0.362427	0.390932	0.584776	0.553417	0.481224
Chr3:31890001-31900000	3	31890001	31900000	null			Not found	0	0.631553	0.386601	0.531683	0.233539	0.408333	0.338123
Chr3:31960001-31990000	3	31960001	31990000	Kcnmb2	ENSMUSG00000037610	potassium large conductance calcium-activated channel, subfamily M, beta member 2 [Source:MGI Symbol;Acc:MGI:1919663]	overlapping	0	0.542864	0.4303	0.501561	0.164873	0.285973	0.33692
Chr3:32010001-32020000	3	32010001	32020000	Kcnmb2	ENSMUSG00000037610	potassium large conductance calcium-activated channel, subfamily M, beta member 2 [Source:MGI Symbol;Acc:MGI:1919663]	overlapping	0	0.617863	0.486644	0.475675	0.440774	0.328624	0.237928
Chr3:32060001-32070000	3	32060001	32070000	Kcnmb2	ENSMUSG00000037610	potassium large conductance calcium-activated channel, subfamily M, beta member 2 [Source:MGI Symbol;Acc:MGI:1919663]	overlapping	0	0.676633	0.577546	0.555956	0.224771	0.306949	0.357793
Chr3:32100001-32120000	3	32100001	32120000	Kcnmb2	ENSMUSG00000037610	potassium large conductance calcium-activated channel, subfamily M, beta member 2 [Source:MGI Symbol;Acc:MGI:1919663]	overlapping	0	0.640403	0.54364	0.664976	0.697161	0.517233	0.343482
Chr3:32150001-32160000	3	32150001	32160000	Kcnmb2	ENSMUSG00000037610	potassium large conductance calcium-activated channel, subfamily M, beta member 2 [Source:MGI Symbol;Acc:MGI:1919663]	overlapping	0	0.598087	0.487917	0.507798	1.12509	0.558311	0.279069
Chr3:32330001-32350000	3	32330001	32350000	Zmat3	ENSMUSG00000027663	zinc finger matrin type 3 [Source:MGI Symbol;Acc:MGI:1195270]	overlapping	0	0.621595	0.399819	0.362734	0.413542	0.496607	0.490172
Chr3:32370001-32390000	3	32370001	32390000	null			Not found	0	0.703044	0.466004	0.493782	0.301465	0.265871	0.31754
Chr3:32470001-32500000	3	32470001	32500000	Kcnmb3	ENSMUSG00000091091	potassium large conductance calcium-activated channel, subfamily M, beta member 3 [Source:MGI Symbol;Acc:MGI:3612244]	overlapping	0	0.58352	0.423028	0.413447	0.275901	0.390736	0.338111
Chr3:32520001-32530000	3	32520001	32530000	Zfp639	ENSMUSG00000027667	zinc finger protein 639 [Source:MGI Symbol;Acc:MGI:1915028]	overlapping	0	0.572365	0.48212	0.454773	0.720628	0.61145	0.291597
Chr3:32600001-32640000	3	32600001	32640000	Gnb4	ENSMUSG00000027669	guanine nucleotide binding protein (G protein), beta 4 [Source:MGI Symbol;Acc:MGI:104581]	overlapping	0	0.568977	0.405568	0.399693	0.411195	0.570372	0.267453
Chr3:32670001-32700000	3	32670001	32700000	null			Not found	0	0.629983	0.410021	0.44195	0.4558	0.453548	0.282663
Chr3:32730001-32740000	3	32730001	32740000	Mrpl47	ENSMUSG00000037531	mitochondrial ribosomal protein L47 [Source:MGI Symbol;Acc:MGI:1921850]	overlapping	0	0.586333	0.554549	0.321476	0.333082	0.439797	0.375689
Chr3:32810001-32880000	3	32810001	32880000	Usp13	ENSMUSG00000056900	ubiquitin specific peptidase 13 (isopeptidase T-3) [Source:MGI Symbol;Acc:MGI:1919857]	overlapping	0	0.627166	0.439992	0.566836	0.481741	0.529944	0.395367
Chr3:32900001-32930000	3	32900001	32930000	Usp13	ENSMUSG00000056900	ubiquitin specific peptidase 13 (isopeptidase T-3) [Source:MGI Symbol;Acc:MGI:1919857]	overlapping	0	0.628786	0.429908	0.491234	0.707494	0.590591	0.479441
Chr3:33000001-33010000	3	33000001	33010000	Pex5l	ENSMUSG00000027674	peroxisomal biogenesis factor 5-like [Source:MGI Symbol;Acc:MGI:1916672]	overlapping	0	0.580247	0.414216	0.58843	0.224771	0.517059	0.361351
Chr3:33040001-33050000	3	33040001	33050000	Pex5l	ENSMUSG00000027674	peroxisomal biogenesis factor 5-like [Source:MGI Symbol;Acc:MGI:1916672]	overlapping	0	0.595873	0.32911	0.53728	0.333082	0.386658	0.37568
Chr3:33140001-33150000	3	33140001	33150000	Pex5l	ENSMUSG00000027674	peroxisomal biogenesis factor 5-like [Source:MGI Symbol;Acc:MGI:1916672]	overlapping	0	0.593937	0.407241	0.401739	0.314927	0.282826	0.322011
Chr3:33280001-33290000	3	33280001	33290000	null			Not found	0	0.576376	0.418834	0.473809	1.0074	0.75164	0.50628
Chr3:33390001-33400000	3	33390001	33400000	SNORA48	ENSMUSG00000088260	Small nucleolar RNA SNORA48 [Source:RFAM;Acc:RF00554]	overlapping	0	0.584258	0.495881	0.533179	0.251694	0.222346	0.495544
Chr3:33840001-33850000	3	33840001	33850000	Ccdc39	ENSMUSG00000027676	coiled-coil domain containing 39 [Source:MGI Symbol;Acc:MGI:1289263]	overlapping	0	0.594076	0.544135	0.442821	0.269849	0.669484	0.203957
Chr3:33900001-33910000	3	33900001	33910000	null			Not found	0	0.582183	0.447532	0.422289	0.386928	0.328624	0.295172
Chr3:33950001-33960000	3	33950001	33960000	SNORA17	ENSMUSG00000077559	Small nucleolar RNA SNORA17 [Source:RFAM;Acc:RF00560]	overlapping	0	0.627402	0.464826	0.402865	0.450161	0.461821	0.236145
Chr3:33980001-33990000	3	33980001	33990000	null			Not found	0	0.60597	0.498237	0.32409	0.458929	0.219898	0.372104
Chr3:34150001-34160000	3	34150001	34160000	Sox2ot	ENSMUSG00000090828	SOX2 overlapping transcript (non-protein coding) [Source:MGI Symbol;Acc:MGI:2444112]	overlapping	0	0.678708	0.365867	0.564545	0.296772	0.222346	0.343473
Chr3:34210001-34220000	3	34210001	34220000	Sox2ot	ENSMUSG00000090828	SOX2 overlapping transcript (non-protein coding) [Source:MGI Symbol;Acc:MGI:2444112]	overlapping	0	0.586194	0.562607	0.59254	0.827083	0.309396	0.497346
Chr3:34280001-34360000	3	34280001	34360000	Sox2ot	ENSMUSG00000090828	SOX2 overlapping transcript (non-protein coding) [Source:MGI Symbol;Acc:MGI:2444112]	overlapping	0	0.54087	0.428847	0.51595	0.349754	0.346803	0.379928
Chr3:34390001-34400000	3	34390001	34400000	Sox2ot	ENSMUSG00000090828	SOX2 overlapping transcript (non-protein coding) [Source:MGI Symbol;Acc:MGI:2444112]	overlapping	0	0.61952	0.49244	0.403244	0.188461	0.418121	0.418604
Chr3:34420001-34430000	3	34420001	34430000	Sox2ot	ENSMUSG00000090828	SOX2 overlapping transcript (non-protein coding) [Source:MGI Symbol;Acc:MGI:2444112]	overlapping	0	0.596012	0.475146	0.463732	0.323695	0.333518	0.379246
Chr3:34460001-34470000	3	34460001	34470000	Sox2ot	ENSMUSG00000090828	SOX2 overlapping transcript (non-protein coding) [Source:MGI Symbol;Acc:MGI:2444112]	overlapping	0	0.625606	0.511997	0.48202	0.224771	0.423016	0.547421
Chr3:34490001-34500000	3	34490001	34500000	Sox2ot	ENSMUSG00000090828	SOX2 overlapping transcript (non-protein coding) [Source:MGI Symbol;Acc:MGI:2444112]	overlapping	0	0.621734	0.436034	0.502183	0.332463	0.517059	0.524175
Chr3:34550001-34560000	3	34550001	34560000	Sox2ot	ENSMUSG00000090828	SOX2 overlapping transcript (non-protein coding) [Source:MGI Symbol;Acc:MGI:2444112]	overlapping	0	0.584258	0.485466	0.380098	0.467697	0.461472	0.284446
Chr3:34580001-34620000	3	34580001	34620000	Sox2ot	ENSMUSG00000090828	SOX2 overlapping transcript (non-protein coding) [Source:MGI Symbol;Acc:MGI:2444112]	overlapping	0	0.598501	0.446106	0.498172	0.350618	0.361923	0.349742
Chr3:34670001-34680000	3	34670001	34680000	Sox2ot	ENSMUSG00000090828	SOX2 overlapping transcript (non-protein coding) [Source:MGI Symbol;Acc:MGI:2444112]	overlapping	0	0.590065	0.43151	0.433493	0.30554	0.190882	0.304116
Chr3:34700001-34730000	3	34700001	34730000	null			Not found	0	0.563331	0.439112	0.430251	0.359593	0.39633	0.313065
Chr3:34750001-34800000	3	34750001	34800000	null			Not found	0	0.601101	0.405705	0.45544	0.248311	0.31464	0.285872
Chr3:34820001-34840000	3	34820001	34840000	null			Not found	0	0.639365	0.463106	0.498077	0.13054	0.351697	0.259395
Chr3:34860001-34890000	3	34860001	34890000	null			Not found	0	0.640034	0.459847	0.499325	0.37149	0.324662	0.283254
Chr3:34950001-34980000	3	34950001	34980000	null			Not found	0	0.71669	0.403864	0.55857	0.32036	0.368945	0.366736
Chr3:35010001-35020000	3	35010001	35020000	null			Not found	0	0.635424	0.540695	0.46896	0.252313	0.338413	0.300558
Chr3:35060001-35070000	3	35060001	35070000	null			Not found	0	0.603894	0.378543	0.425272	0.251694	0.364982	0.348859
Chr3:35090001-35100000	3	35090001	35100000	null			Not found	0	0.61938	0.454412	0.441704	0.197848	0.311843	0.441867
Chr3:35170001-35180000	3	35170001	35180000	null			Not found	0	0.633349	0.377365	0.584699	0.395696	0.468814	0.415037
Chr3:35240001-35250000	3	35240001	35250000	null			Not found	0	0.586333	0.404979	0.435728	0.306159	0.137742	0.245088
Chr3:35270001-35280000	3	35270001	35280000	null			Not found	0	0.665018	0.508557	0.431996	0.845238	0.72507	0.595721
Chr3:35490001-35500000	3	35490001	35500000	null			Not found	0	0.625606	0.367045	0.468212	0.252313	0.309396	0.398943
Chr3:35520001-35530000	3	35520001	35530000	null			Not found	0	0.615648	0.577546	0.596272	0.242926	0.224793	0.313068
Chr3:35730001-35740000	3	35730001	35740000	U6	ENSMUSG00000064834	U6 spliceosomal RNA [Source:RFAM;Acc:RF00026]	overlapping	0	0.662664	0.363511	0.523093	0.916621	0.894276	0.372086
Chr3:35950001-35960000	3	35950001	35960000	Mccc1	ENSMUSG00000027709	methylcrotonoyl-Coenzyme A carboxylase 1 (alpha) [Source:MGI Symbol;Acc:MGI:1919289]	overlapping	0	0.656996	0.491262	0.504427	0.980472	0.698501	0.440093
Chr3:36080001-36090000	3	36080001	36090000	Acad9	ENSMUSG00000027710	acyl-Coenzyme A dehydrogenase family, member 9 [Source:MGI Symbol;Acc:MGI:1914272]	overlapping	0	0.674836	0.801806	0.550719	0.648009	0.640467	0.552788
Chr3:36120001-36130000	3	36120001	36130000	null			Not found	0	0.657136	0.521139	0.542886	0.863393	0.744298	0.33453
Chr3:36160001-36170000	3	36160001	36170000	D3Ertd254e	ENSMUSG00000033883	DNA segment, Chr 3, ERATO Doi 254, expressed [Source:MGI Symbol;Acc:MGI:1098769]	overlapping	0	0.59228	0.387685	0.440207	1.43063	0.754087	0.499111
Chr3:36290001-36300000	3	36290001	36300000	null			Not found	0	0.621595	0.532731	0.492475	0.144002	0.306949	0.320219
Chr3:36400001-36430000	3	36400001	36430000	null			Not found	0	0.554618	0.529621	0.486259	0.791186	0.532557	0.348844
Chr3:36460001-36500000	3	36460001	36500000	Anxa5	ENSMUSG00000027712	annexin A5 [Source:MGI Symbol;Acc:MGI:106008]	overlapping	0	0.586782	0.450995	0.424619	0.485697	0.460423	0.404752
Chr3:36520001-36560000	3	36520001	36560000	Gm11549	ENSMUSG00000085007	predicted gene 11549 [Source:MGI Symbol;Acc:MGI:3650339]	overlapping	0	0.642234	0.442419	0.459063	0.45439	0.380015	0.312167
Chr3:36650001-36700000	3	36650001	36700000	Trpc3	ENSMUSG00000027716	transient receptor potential cation channel, subfamily C, member 3 [Source:MGI Symbol;Acc:MGI:109526]	overlapping	0	0.597616	0.456985	0.490911	0.358127	0.300656	0.39786
Chr3:36720001-36740000	3	36720001	36740000	null			Not found	0	0.583221	0.468266	0.529813	0.337157	0.399942	0.296969
Chr3:36780001-36790000	3	36780001	36790000	null			Not found	0	0.584119	0.516615	0.372626	0.206616	0.473708	0.347058
Chr3:36820001-36840000	3	36820001	36840000	null			Not found	0	0.616756	0.446448	0.57144	0.288004	0.333518	0.361355
Chr3:37130001-37140000	3	37130001	37140000	null			Not found	0	0.613573	0.400361	0.394285	0.261081	0.362535	0.533092
Chr3:37180001-37220000	3	37180001	37220000	Gm12532	ENSMUSG00000084754	predicted gene 12532 [Source:MGI Symbol;Acc:MGI:3650618]	overlapping	0	0.635838	0.510501	0.511795	0.34185	0.422929	0.372993
Chr3:37250001-37260000	3	37250001	37260000	AL691478.1	ENSMUSG00000094007	No description	overlapping	0	0.600023	0.473968	0.445066	1.19586	1.08761	0.314869
Chr3:37350001-37380000	3	37350001	37380000	Fgf2	ENSMUSG00000037225	fibroblast growth factor 2 [Source:MGI Symbol;Acc:MGI:95516]	overlapping	0	0.61952	0.473246	0.494969	0.353747	0.393883	0.425764
Chr3:37570001-37650000	3	37570001	37650000	Spata5	ENSMUSG00000027722	spermatogenesis associated 5 [Source:MGI Symbol;Acc:MGI:1927170]	overlapping	0	0.563809	0.460933	0.42737	0.385523	0.379709	0.295179
Chr3:37680001-37810000	3	37680001	37810000	Gm5148	ENSMUSG00000058174	predicted gene 5148 [Source:MGI Symbol;Acc:MGI:3646006]	overlapping	0	0.592937	0.473914	0.502271	0.38327	0.438882	0.393842
Chr3:37840001-37850000	3	37840001	37850000	null			Not found	0	0.595873	0.392303	0.473809	0.34185	0.386658	0.524148
Chr3:37910001-37920000	3	37910001	37920000	null			Not found	0	0.580387	0.350929	0.507789	0.404464	0.304502	0.474082
Chr3:37980001-38000000	3	37980001	38000000	SNORA17	ENSMUSG00000077728	Small nucleolar RNA SNORA17 [Source:RFAM;Acc:RF00560]	overlapping	0	0.694403	0.415346	0.606727	0.28362	0.303278	0.466918
Chr3:38040001-38050000	3	38040001	38050000	null			Not found	0	0.592001	0.557989	0.415187	0.215384	0.309396	0.481233
Chr3:38140001-38150000	3	38140001	38150000	null			Not found	0	0.617445	0.559167	0.590296	0.34185	0.251362	0.670852
Chr3:38170001-38180000	3	38170001	38180000	null			Not found	0	0.649114	0.427976	0.508158	0.405083	0.461472	0.465121
Chr3:38250001-38280000	3	38250001	38280000	AC162799.1	ENSMUSG00000092986	No description	overlapping	0	0.5808	0.494341	0.586438	0.333082	0.414043	0.447235
Chr3:38410001-38490000	3	38410001	38490000	Ankrd50	ENSMUSG00000044864	ankyrin repeat domain 50 [Source:MGI Symbol;Acc:MGI:2139777]	overlapping	0	0.680419	0.484642	0.508348	0.637526	0.593927	0.36338
Chr3:38540001-38590000	3	38540001	38590000	AC114901.1	ENSMUSG00000076385	No description	overlapping	0	0.596455	0.428466	0.464253	0.313173	0.353795	0.291599
[truncated: 15,843 more rows]
