# Supplementary material for: Multi-omics analyses demonstrate a critical role for EHMT1 methyltransferase in transcriptional repression during oogenesis
Source: Genome Res. 2023 Jan;33(1):18–31. doi: 10.1101/gr.277046.122 (PMC9977154; doi:10.1101/gr.277046.122)
Supplement: Supplemental Material [file supp_gr.277046.122_Supplemental_Table_S3.xlsx]

## Sheet: RPKM all oocyte transcripts
Probe	Chromosome	Start	End	Probe Strand	Feature	ID	Description	Feature Strand	Type	Feature Orientation	Distance	Ehmt2 Control	Ehmt2 cKO	Ehmt1/2 Control	Ehmt1/2 cDKO
TCONS_00003969	1	3201005	3671507	-	Xkr4	ENSMUSG00000051951	X Kell blood group precursor related family member 4 [Source:MGI Symbol;Acc:MGI:3528744]	-	gene	overlapping	0	0.319653	3.37373	1.81514	2.99959
NOMERGE_TCONS_00000001	1	3466587	3513553	+	Xkr4	ENSMUSG00000051951	X Kell blood group precursor related family member 4 [Source:MGI Symbol;Acc:MGI:3528744]	-	gene	overlapping	0	-0.555659	-0.883703	-0.800964	-0.60586
TCONS_00000002	1	3569736	3570355	+	Xkr4	ENSMUSG00000051951	X Kell blood group precursor related family member 4 [Source:MGI Symbol;Acc:MGI:3528744]	-	gene	overlapping	0	-0.555659	-0.883703	-0.800964	-0.60586
TCONS_00000003	1	3855093	3857147	+	null					Not found	0	-0.555659	-0.883703	-0.800964	-0.60586
TCONS_00003979	1	3900015	3986334	-	null					Not found	0	2.81694	1.65828	2.88682	1.83862
TCONS_00003985	1	4139431	4170378	-	null					Not found	0	-0.171658	-0.833035	-0.750297	-0.529859
TCONS_00003987	1	4197537	4228603	-	null					Not found	0	-0.555659	-0.883703	-0.800964	-0.60586
TCONS_00003988	1	4230958	4243256	-	null					Not found	0	-0.555659	-0.883703	-0.800964	-0.60586
TCONS_00003990	1	4243424	4311431	-	null					Not found	0	-0.555659	-0.883703	-0.800964	0.707107
TCONS_00003996	1	4343507	4469869	-	Rp1	ENSMUSG00000025900	retinitis pigmentosa 1 (human) [Source:MGI Symbol;Acc:MGI:1341105]	-	gene	overlapping	0	0.986319	1.73241	2.09398	2.11078
TCONS_00000006	1	4659849	4661001	+	null					Not found	0	-0.555659	-0.883703	-0.800964	-0.60586
TCONS_00000007	1	4720695	4721484	+	U6	ENSMUSG00000088000	U6 spliceosomal RNA [Source:RFAM;Acc:RF00026]	-	gene	upstream	1793	-0.555659	-0.883703	-0.800964	-0.60586
TCONS_00004005	1	4733558	4734447	-	null					Not found	0	-0.555659	-0.883703	-0.800964	-0.60586
TCONS_00004006	1	4764702	4785793	-	Mrpl15	ENSMUSG00000033845	mitochondrial ribosomal protein L15 [Source:MGI Symbol;Acc:MGI:1351639]	-	gene	overlapping	0	4.41556	4.77871	4.55648	4.3405
TCONS_00000008	1	4807740	4849588	+	Lypla1	ENSMUSG00000025903	lysophospholipase 1 [Source:MGI Symbol;Acc:MGI:1344588]	+	gene	overlapping	0	5.11234	5.03282	5.11601	4.93271
TCONS_00004011	1	4851840	4852915	-	Lypla1	ENSMUSG00000025903	lysophospholipase 1 [Source:MGI Symbol;Acc:MGI:1344588]	+	gene	overlapping	0	-0.555659	-0.883703	-0.800964	-0.60586
TCONS_00000011	1	4852932	4854456	+	Lypla1	ENSMUSG00000025903	lysophospholipase 1 [Source:MGI Symbol;Acc:MGI:1344588]	+	gene	overlapping	0	-0.555659	-0.883703	-0.800964	-0.60586
TCONS_00000013	1	4856231	4899487	+	Lypla1	ENSMUSG00000025903	lysophospholipase 1 [Source:MGI Symbol;Acc:MGI:1344588]	+	gene	overlapping	0	6.06909	5.83536	6.76362	6.75777
TCONS_00004013	1	4909576	5019539	-	Rgs20	ENSMUSG00000002459	regulator of G-protein signaling 20 [Source:MGI Symbol;Acc:MGI:1929866]	-	gene	overlapping	0	-0.555659	-0.883703	-0.800964	-0.60586
TCONS_00000020	1	4930664	4970242	+	Rgs20	ENSMUSG00000002459	regulator of G-protein signaling 20 [Source:MGI Symbol;Acc:MGI:1929866]	-	gene	overlapping	0	-0.504991	0.0792871	-0.750297	-0.529859
ENSMUST00000144339	1	4970857	4976820	+	Rgs20	ENSMUSG00000002459	regulator of G-protein signaling 20 [Source:MGI Symbol;Acc:MGI:1929866]	-	gene	overlapping	0	-0.555659	-0.883703	-0.800964	-0.60586
TCONS_00000022	1	5083052	5162549	+	Atp6v1h	ENSMUSG00000033793	ATPase, H+ transporting, lysosomal V1 subunit H [Source:MGI Symbol;Acc:MGI:1914864]	+	gene	overlapping	0	6.16762	6.03828	5.8895	6.28084
TCONS_00000028	1	5373299	5375036	+	null					Not found	0	-0.555659	-0.883703	-0.800964	-0.60586
TCONS_00004017	1	5416760	5437051	-	null					Not found	0	0.740664	0.153418	0.351039	0.0461428
TCONS_00004019	1	5437986	5440377	-	null					Not found	0	-0.555659	-0.883703	-0.800964	-0.60586
TCONS_00004020	1	5495856	5496800	-	null					Not found	0	-0.555659	-0.883703	-0.800964	-0.60586
TCONS_00004025	1	5500699	5506420	-	null					Not found	0	-0.555659	-0.883703	-0.800964	-0.60586
TCONS_00000030	1	5516837	5606131	+	Oprk1	ENSMUSG00000025905	opioid receptor, kappa 1 [Source:MGI Symbol;Acc:MGI:97439]	+	gene	overlapping	0	-0.504991	0.41262	-0.699629	0.262622
TCONS_00004031	1	6025493	6056710	-	null					Not found	0	-0.504991	-0.883703	-0.800964	-0.60586
TCONS_00004032	1	6162083	6162525	-	null					Not found	0	-0.555659	-0.883703	-0.800964	-0.60586
TCONS_00000038	1	6206197	6275577	+	Rb1cc1	ENSMUSG00000025907	RB1-inducible coiled-coil 1 [Source:MGI Symbol;Acc:MGI:1341850]	+	gene	overlapping	0	7.48919	7.5073	7.87862	7.50006
NOMERGE_TCONS_00000045	1	6213293	6215292	-	Rb1cc1	ENSMUSG00000025907	RB1-inducible coiled-coil 1 [Source:MGI Symbol;Acc:MGI:1341850]	+	gene	overlapping	0	-0.555659	-0.883703	-0.800964	-0.60586
TCONS_00004033	1	6325364	6327128	-	null					Not found	0	-0.555659	-0.398366	-0.366296	0.762622
TCONS_00000043	1	6381888	6382081	+	Fam150a	ENSMUSG00000087247	family with sequence similarity 150, member A [Source:MGI Symbol;Acc:MGI:3645495]	+	gene	overlapping	0	-0.555659	-0.883703	-0.800964	-0.60586
TCONS_00004034	1	6405797	6417378	-	null					Not found	0	-0.555659	-0.883703	-0.800964	-0.60586
TCONS_00000044	1	6415967	6860946	+	St18	ENSMUSG00000033740	suppression of tumorigenicity 18 [Source:MGI Symbol;Acc:MGI:2446700]	+	gene	overlapping	0	3.27047	3.41074	3.59126	3.29207
CUFF.89.1	1	6437588	6441428	-	null					Not found	0	2.33445	2.86806	3.17763	3.27586
TCONS_00004036	1	6847934	6998474	-	St18	ENSMUSG00000033740	suppression of tumorigenicity 18 [Source:MGI Symbol;Acc:MGI:2446700]	+	gene	overlapping	0	-0.454323	0.903931	-0.416963	1.33862
TCONS_00004049	1	7020465	7023952	-	null					Not found	0	0.596344	0.0792871	1.32	0.338624
TCONS_00004050	1	7029412	7067294	-	null					Not found	0	-0.171658	-0.304714	-0.416963	-0.0298587
TCONS_00000063	1	7078344	7082505	+	null					Not found	0	-0.555659	-0.883703	-0.416963	-0.0298587
TCONS_00004054	1	7087902	7088859	-	Pcmtd1	ENSMUSG00000051285	protein-L-isoaspartate (D-aspartate) O-methyltransferase domain containing 1 [Source:MGI Symbol;Acc:MGI:2441773]	+	gene	downstream	61	-0.555659	-0.883703	-0.800964	-0.60586
TCONS_00000064	1	7088882	7173628	+	Pcmtd1	ENSMUSG00000051285	protein-L-isoaspartate (D-aspartate) O-methyltransferase domain containing 1 [Source:MGI Symbol;Acc:MGI:2441773]	+	gene	overlapping	0	4.87476	5.09338	4.93661	5.5185
TCONS_00004055	1	7256240	7256412	-	null					Not found	0	-0.555659	-0.883703	-0.750297	-0.453857
TCONS_00000067	1	7280479	7299564	+	null					Not found	0	1.23197	2.09892	1.84832	2.29207
TCONS_00004060	1	7314664	7397929	-	null					Not found	0	0.652986	-0.0650327	0.684372	1.33862
TCONS_00000072	1	7452694	7476672	+	null					Not found	0	0.545677	1.64473	0.0177054	1.63111
TCONS_00000076	1	7501775	7506747	+	null					Not found	0	-0.555659	-0.883703	-0.800964	-0.60586
TCONS_00000079	1	7516365	7518111	+	null					Not found	0	-0.555659	-0.883703	-0.800964	-0.60586
TCONS_00000081	1	7524279	7528502	+	null					Not found	0	-0.555659	-0.833035	-0.221976	0.762622
TCONS_00000084	1	7561794	7566126	+	null					Not found	0	0.0233296	-0.254046	-0.800964	-0.60586
TCONS_00004066	1	7614632	7615592	-	null					Not found	0	-0.555659	-0.883703	-0.800964	-0.60586
TCONS_00004067	1	7676904	7682100	-	null					Not found	0	-0.555659	0.0792871	-0.171308	1.04614
TCONS_00004069	1	8122957	8123174	-	null					Not found	0	-0.555659	-0.883703	-0.800964	-0.60586
TCONS_00000092	1	8258652	8268010	+	null					Not found	0	1.79133	3.73241	0.546026	4.57986
TCONS_00000095	1	8358651	8358832	+	null					Not found	0	-0.555659	-0.883703	-0.800964	-0.60586
TCONS_00004072	1	8361475	9299878	-	Sntg1	ENSMUSG00000025909	syntrophin, gamma 1 [Source:MGI Symbol;Acc:MGI:1918346]	-	gene	overlapping	0	-0.504991	0.978062	-0.750297	1.04614
TCONS_00004091	1	9346612	9347188	-	null					Not found	0	-0.555659	-0.883703	-0.800964	-0.60586
TCONS_00000096	1	9381629	9382751	+	null					Not found	0	-0.555659	-0.883703	-0.800964	-0.60586
TCONS_00000097	1	9386800	9388303	+	null					Not found	0	-0.555659	-0.883703	-0.800964	-0.60586
TCONS_00000099	1	9429039	9440899	+	null					Not found	0	-0.12099	0.550966	-0.0329622	-0.529859
TCONS_00000103	1	9538773	9539921	+	null					Not found	0	-0.555659	-0.883703	-0.800964	-0.60586
TCONS_00000104	1	9545336	9547454	+	Rrs1	ENSMUSG00000061024	RRS1 ribosome biogenesis regulator homolog (S. cerevisiae) [Source:MGI Symbol;Acc:MGI:1929721]	+	gene	overlapping	0	0.740664	0.0286194	0.741014	1.44982
TCONS_00000105	1	9547948	9577970	+	Adhfe1	ENSMUSG00000025911	alcohol dehydrogenase, iron containing, 1 [Source:MGI Symbol;Acc:MGI:1923437]	+	gene	overlapping	0	-0.555659	1.66819	0.212693	0.838624
TCONS_00004092	1	9554901	9631092	-	Adhfe1	ENSMUSG00000025911	alcohol dehydrogenase, iron containing, 1 [Source:MGI Symbol;Acc:MGI:1923437]	+	gene	overlapping	0	2.87397	2.47809	3.21612	2.20711
TCONS_00004099	1	9667404	9700401	-	Mybl1	ENSMUSG00000025912	myeloblastosis oncogene-like 1 [Source:MGI Symbol;Acc:MGI:99925]	-	gene	overlapping	0	3.09363	3.63277	3.11515	3.3535
TCONS_00004100	1	9704039	9704159	-	null					Not found	0	-0.555659	-0.883703	-0.800964	-0.60586
TCONS_00000108	1	9707700	9707863	+	null					Not found	0	-0.555659	-0.883703	-0.800964	-0.60586
TCONS_00004104	1	9718622	9748382	-	Vcpip1	ENSMUSG00000045210	valosin containing protein (p97)/p47 complex interacting protein 1 [Source:MGI Symbol;Acc:MGI:1917925]	-	gene	overlapping	0	7.17083	7.17435	7.16647	7.15705
TCONS_00000110	1	9747648	9791922	+	Vcpip1	ENSMUSG00000045210	valosin containing protein (p97)/p47 complex interacting protein 1 [Source:MGI Symbol;Acc:MGI:1917925]	-	gene	overlapping	0	-0.555659	-0.883703	-0.750297	-0.60586
TCONS_00004105	1	9762070	9762522	-	null					Not found	0	-0.555659	-0.883703	-0.800964	-0.0298587
TCONS_00000113	1	9798130	9902556	+	Sgk3	ENSMUSG00000025915	serum/glucocorticoid regulated kinase 3 [Source:MGI Symbol;Acc:MGI:2182368]	+	gene	overlapping	0	-0.555659	-0.833035	-0.750297	0.262623
TCONS_00004106	1	9802288	9802489	-	Sgk3	ENSMUSG00000025915	serum/glucocorticoid regulated kinase 3 [Source:MGI Symbol;Acc:MGI:2182368]	+	gene	overlapping	0	-0.555659	-0.833035	-0.800964	-0.60586
TCONS_00000116	1	9908638	9922525	+	6030422M02Rik	ENSMUSG00000046101	RIKEN cDNA 6030422M02 gene [Source:MGI Symbol;Acc:MGI:3045334]	+	gene	overlapping	0	-0.555659	-0.883703	-0.800964	-0.60586
TCONS_00000118	1	9932120	9940954	+	6030422M02Rik	ENSMUSG00000046101	RIKEN cDNA 6030422M02 gene [Source:MGI Symbol;Acc:MGI:3045334]	+	gene	overlapping	0	-0.555659	-0.883703	-0.800964	-0.60586
TCONS_00004108	1	9941959	9944250	-	6030422M02Rik	ENSMUSG00000046101	RIKEN cDNA 6030422M02 gene [Source:MGI Symbol;Acc:MGI:3045334]	+	gene	overlapping	0	-0.171658	0.708943	3.09398	1.83862
TCONS_00004111	1	9960162	9968117	-	Gm10567	ENSMUSG00000073738	predicted gene 10567 [Source:MGI Symbol;Acc:MGI:3642215]	-	gene	overlapping	0	-0.555659	-0.883703	-0.750297	-0.60586
TCONS_00004115	1	9968341	10003453	-	Ppp1r42	ENSMUSG00000025916	protein phosphatase 1, regulatory subunit 42 [Source:MGI Symbol;Acc:MGI:1921138]	-	gene	overlapping	0	-0.555659	-0.883703	-0.750297	-0.60586
CUFF.105.1	1	9969304	9969675	+	Ppp1r42	ENSMUSG00000025916	protein phosphatase 1, regulatory subunit 42 [Source:MGI Symbol;Acc:MGI:1921138]	-	gene	overlapping	0	-0.555659	-0.883703	-0.800964	-0.60586
CUFF.107.1	1	9983644	9986439	+	Ppp1r42	ENSMUSG00000025916	protein phosphatase 1, regulatory subunit 42 [Source:MGI Symbol;Acc:MGI:1921138]	-	gene	overlapping	0	-0.555659	-0.883703	-0.800964	-0.60586
TCONS_00004117	1	10007586	10008042	-	Ppp1r42	ENSMUSG00000025916	protein phosphatase 1, regulatory subunit 42 [Source:MGI Symbol;Acc:MGI:1921138]	-	gene	overlapping	0	-0.555659	-0.883703	-0.800964	-0.60586
TCONS_00004120	1	10024602	10038218	-	Cops5	ENSMUSG00000025917	COP9 (constitutive photomorphogenic) homolog, subunit 5 (Arabidopsis thaliana) [Source:MGI Symbol;Acc:MGI:1349415]	-	gene	overlapping	0	7.07967	6.94953	6.1289	6.38698
TCONS_00000120	1	10038218	10136768	+	Cspp1	ENSMUSG00000056763	centrosome and spindle pole associated protein 1 [Source:MGI Symbol;Acc:MGI:2681832]	+	gene	overlapping	0	3.97875	3.74008	3.66813	4.11975
TCONS_00004123	1	10137527	10233460	-	Arfgef1	ENSMUSG00000067851	ADP-ribosylation factor guanine nucleotide-exchange factor 1(brefeldin A-inhibited) [Source:MGI Symbol;Acc:MGI:2442988]	-	gene	overlapping	0	8.37848	8.47634	8.68194	8.6493
TCONS_00000125	1	10260318	10400047	+	Cpa6	ENSMUSG00000042501	carboxypeptidase A6 [Source:MGI Symbol;Acc:MGI:3045348]	-	gene	overlapping	0	-0.504991	-0.833035	-0.800964	-0.529859
TCONS_00000131	1	10402423	10403176	+	Cpa6	ENSMUSG00000042501	carboxypeptidase A6 [Source:MGI Symbol;Acc:MGI:3045348]	-	gene	overlapping	0	-0.555659	-0.883703	-0.800964	-0.60586
TCONS_00004125	1	10472475	10477823	-	Cpa6	ENSMUSG00000042501	carboxypeptidase A6 [Source:MGI Symbol;Acc:MGI:3045348]	-	gene	overlapping	0	-0.555659	-0.883703	-0.800964	-0.60586
TCONS_00004127	1	10590988	10719905	-	Cpa6	ENSMUSG00000042501	carboxypeptidase A6 [Source:MGI Symbol;Acc:MGI:3045348]	-	gene	overlapping	0	-0.555659	-0.883703	-0.800964	-0.529859
TCONS_00000132	1	10767035	10775626	+	null					Not found	0	-0.555659	-0.883703	-0.800964	-0.60586
TCONS_00000135	1	10782131	10783026	+	null					Not found	0	-0.555659	-0.883703	-0.800964	-0.60586
TCONS_00004132	1	10802236	10805423	-	null					Not found	0	0.212343	-0.782367	-0.750297	-0.0298587
TCONS_00004134	1	10808335	10811735	-	null					Not found	0	-0.555659	-0.883703	-0.800964	-0.60586
TCONS_00004136	1	10814184	10817445	-	null					Not found	0	-0.504991	-0.883703	-0.800964	-0.60586
TCONS_00004137	1	10821515	10831209	-	null					Not found	0	0.212343	1.08811	-0.315628	0.338624
TCONS_00000138	1	10946157	10968564	+	null					Not found	0	1.14813	1.99161	-0.0836299	1.13111
TCONS_00004142	1	10966321	10966743	-	null					Not found	0	-0.555659	-0.883703	-0.800964	-0.60586
TCONS_00000147	1	10989078	10989427	+	null					Not found	0	-0.555659	-0.883703	-0.800964	-0.60586
TCONS_00000148	1	10993465	11303682	+	Prex2	ENSMUSG00000048960iption=phosphatidylinositol-3,4,5-trisphosphate-dependentRac exchange factor 2 [Source:MGI Symbol;Acc:MGI:1923385]	No description	+	gene	overlapping	0	4.7755	5.67571	5.22366	6.934
TCONS_00004147	1	11384074	11389960	-	null					Not found	0	2.83443	3.15556	3.30731	2.79207
TCONS_00000154	1	11414077	11601811	+	A830018L16Rik	ENSMUSG00000057715	RIKEN cDNA A830018L16 gene [Source:MGI Symbol;Acc:MGI:2444149]	+	gene	overlapping	0	2.1988	2.24718	0.828692	3.11078
TCONS_00004148	1	11645311	11646029	-	A830018L16Rik	ENSMUSG00000057715	RIKEN cDNA A830018L16 gene [Source:MGI Symbol;Acc:MGI:2444149]	+	gene	overlapping	0	-0.555659	-0.883703	-0.800964	-0.60586
TCONS_00004151	1	11847811	11848659	-	A830018L16Rik	ENSMUSG00000057715	RIKEN cDNA A830018L16 gene [Source:MGI Symbol;Acc:MGI:2444149]	+	gene	overlapping	0	-0.555659	-0.883703	-0.800964	-0.60586
TCONS_00004152	1	11872121	11873649	-	A830018L16Rik	ENSMUSG00000057715	RIKEN cDNA A830018L16 gene [Source:MGI Symbol;Acc:MGI:2444149]	+	gene	overlapping	0	-0.555659	-0.883703	-0.800964	-0.60586
TCONS_00004154	1	11880699	11886870	-	A830018L16Rik	ENSMUSG00000057715	RIKEN cDNA A830018L16 gene [Source:MGI Symbol;Acc:MGI:2444149]	+	gene	overlapping	0	-0.555659	-0.883703	-0.800964	-0.60586
TCONS_00004159	1	12026209	12041363	-	null					Not found	0	0.263011	0.978062	0.986669	-0.0298587
TCONS_00000161	1	12150760	12174907	+	null					Not found	0	-0.555659	-0.304714	-0.800964	-0.529859
TCONS_00000162	1	12179975	12180755	+	null					Not found	0	-0.504991	-0.883703	-0.800964	-0.60586
TCONS_00004161	1	12272653	12298723	-	null					Not found	0	-0.171658	-0.499701	-0.800964	-0.529859
TCONS_00000163	1	12331495	12342763	+	null					Not found	0	0.929678	3.53836	0.828692	4.81281
TCONS_00004170	1	12478842	12482896	-	null					Not found	0	-0.504991	-0.398366	-0.800964	2.2423
TCONS_00004172	1	12612263	12613539	-	null					Not found	0	-0.555659	-0.883703	-0.800964	-0.60586
TCONS_00004173	1	12639328	12644480	-	null					Not found	0	-0.555659	-0.883703	-0.800964	-0.60586
TCONS_00000168	1	12667563	12673090	+	null					Not found	0	-0.555659	-0.883703	-0.800964	-0.60586
TCONS_00004174	1	12669164	12677613	-	null					Not found	0	-0.555659	-0.833035	-0.800964	1.04614
TCONS_00000171	1	12692430	12861183	+	Sulf1	ENSMUSG00000016918	sulfatase 1 [Source:MGI Symbol;Acc:MGI:2138563]	+	gene	overlapping	0	-0.504991	0.796622	-0.750297	2.92359
TCONS_00004175	1	12797234	12816066	-	Sulf1	ENSMUSG00000016918	sulfatase 1 [Source:MGI Symbol;Acc:MGI:2138563]	+	gene	overlapping	0	-0.504991	-0.499701	-0.221976	0.0461428
TCONS_00004179	1	12866417	12928120	-	Slco5a1	ENSMUSG00000025938	solute carrier organic anion transporter family, member 5A1 [Source:MGI Symbol;Acc:MGI:2443431]	-	gene	overlapping	0	3.16776	4.35018	3.97192	4.18537
TCONS_00004181	1	13012465	13013142	-	null					Not found	0	-0.504991	-0.883703	-0.800964	-0.60586
TCONS_00004183	1	13031670	13034975	-	null					Not found	0	-0.555659	-0.883703	-0.800964	-0.60586
TCONS_00004184	1	13040757	13041128	-	null					Not found	0	1.458	-0.833035	0.40768	-0.529859
TCONS_00000176	1	13048955	13050883	+	null					Not found	0	-0.555659	-0.883703	-0.800964	-0.60586
TCONS_00000178	1	13078455	13094481	+	null					Not found	0	-0.555659	-0.883703	-0.366296	-0.60586
TCONS_00004186	1	13090436	13106091	-	null					Not found	0	-0.555659	-0.883703	-0.750297	-0.60586
TCONS_00004192	1	13139105	13374277	-	Ncoa2	ENSMUSG00000005886	nuclear receptor coactivator 2 [Source:MGI Symbol;Acc:MGI:1276533]	-	gene	overlapping	0	7.00645	7.57967	6.98136	7.46181
TCONS_00004193	1	13412334	13412356	-	null					Not found	0	-0.555659	-0.883703	-0.800964	-0.60586
TCONS_00004195	1	13449869	13454331	-	null					Not found	0	-0.555659	-0.883703	-0.800964	-0.60586
TCONS_00000179	1	13516045	13516175	+	null					Not found	0	-0.555659	-0.883703	-0.800964	-0.60586
TCONS_00004198	1	13564702	13589934	-	Tram1	ENSMUSG00000025935	translocating chain-associating membrane protein 1 [Source:MGI Symbol;Acc:MGI:1919515]	-	gene	overlapping	0	6.67159	6.62636	6.25082	6.71721
TCONS_00000180	1	13621605	13622381	+	null					Not found	0	-0.555659	-0.883703	-0.800964	-0.60586
TCONS_00004205	1	13624845	13660588	-	Lactb2	ENSMUSG00000025937	lactamase, beta 2 [Source:MGI Symbol;Acc:MGI:2442551]	-	gene	overlapping	0	4.96381	4.52032	4.853	4.82726
TCONS_00000181	1	13672580	13701330	+	Xkr9	ENSMUSG00000067813	X Kell blood group precursor related family member 9 homolog [Source:MGI Symbol;Acc:MGI:2686466]	+	gene	overlapping	0	-0.555659	-0.883703	-0.800964	-0.60586
TCONS_00000183	1	13737369	13763209	+	null					Not found	0	-0.555659	-0.833035	-0.800964	-0.60586
TCONS_00000194	1	13769506	13775266	+	SNORA17	ENSMUSG00000077368	Small nucleolar RNA SNORA17 [Source:RFAM;Acc:RF00560]	-	gene	overlapping	0	-0.555659	-0.254046	-0.366296	-0.60586
TCONS_00004206	1	13771178	13772674	-	SNORA17	ENSMUSG00000077368	Small nucleolar RNA SNORA17 [Source:RFAM;Acc:RF00560]	-	gene	upstream	1660	-0.555659	-0.883703	-0.800964	-0.60586
TCONS_00000198	1	13779126	13780114	+	null					Not found	0	-0.555659	-0.883703	-0.800964	-0.60586
TCONS_00000201	1	13842023	13851933	+	null					Not found	0	0.0739974	-0.449034	-0.12064	0.338624
TCONS_00000204	1	13918046	13918547	+	null					Not found	0	-0.555659	-0.883703	-0.800964	-0.60586
TCONS_00000205	1	13929416	13937074	+	7SK	ENSMUSG00000089358	7SK RNA [Source:RFAM;Acc:RF00100]	+	gene	overlapping	0	-0.555659	-0.1157	-0.800964	-0.0298587
TCONS_00000209	1	13979065	13979710	+	null					Not found	0	-0.555659	-0.883703	-0.800964	-0.60586
TCONS_00000211	1	14042261	14080247	+	null					Not found	0	-0.555659	-0.883703	-0.800964	-0.529859
TCONS_00004212	1	14168943	14310667	-	Eya1	ENSMUSG00000025932	eyes absent 1 homolog (Drosophila) [Source:MGI Symbol;Acc:MGI:109344]	-	gene	overlapping	0	5.86613	5.93813	6.42854	5.77304
TCONS_00004216	1	14658469	14717504	-	null					Not found	0	-0.504991	0.903931	0.300371	1.86807
TCONS_00004220	1	14720884	14722856	-	null					Not found	0	-0.555659	-0.883703	-0.800964	-0.60586
TCONS_00004223	1	14872635	14922120	-	Trpa1	ENSMUSG00000032769	transient receptor potential cation channel, subfamily A, member 1 [Source:MGI Symbol;Acc:MGI:3522699]	-	gene	overlapping	0	4.02803	4.52069	4.77886	5.95981
TCONS_00000217	1	14964718	14968942	+	null					Not found	0	-0.555659	-0.883703	-0.800964	-0.60586
TCONS_00000220	1	15072644	15077267	+	null					Not found	0	-0.555659	-0.883703	-0.800964	-0.60586
TCONS_00000223	1	15107250	15108249	+	null					Not found	0	-0.555659	-0.883703	-0.800964	-0.60586
TCONS_00000224	1	15162325	15163937	+	null					Not found	0	-0.504991	-0.883703	-0.800964	-0.60586
TCONS_00004228	1	15205789	15212882	-	null					Not found	0	-0.12099	2.19542	0.87936	3.92359
TCONS_00004229	1	15224291	15228056	-	null					Not found	0	-0.555659	-0.883703	-0.800964	-0.529859
TCONS_00004231	1	15285431	15287237	-	Kcnb2	ENSMUSG00000092083	potassium voltage gated channel, Shab-related subfamily, member 2 [Source:MGI Symbol;Acc:MGI:99632]	+	gene	downstream	22	0.602318	-0.449034	-0.750297	-0.60586
TCONS_00000226	1	15285749	15588664	+	Kcnb2	ENSMUSG00000092083	potassium voltage gated channel, Shab-related subfamily, member 2 [Source:MGI Symbol;Acc:MGI:99632]	+	gene	overlapping	0	3.53025	4.0332	3.67176	2.42359
TCONS_00000241	1	15604400	15604530	+	Kcnb2	ENSMUSG00000092083	potassium voltage gated channel, Shab-related subfamily, member 2 [Source:MGI Symbol;Acc:MGI:99632]	+	gene	overlapping	0	-0.555659	-0.883703	-0.800964	-0.60586
TCONS_00000242	1	15651347	15652898	+	Kcnb2	ENSMUSG00000092083	potassium voltage gated channel, Shab-related subfamily, member 2 [Source:MGI Symbol;Acc:MGI:99632]	+	gene	overlapping	0	-0.555659	-0.883703	-0.800964	-0.60586
TCONS_00004232	1	15651840	15652783	-	Kcnb2	ENSMUSG00000092083	potassium voltage gated channel, Shab-related subfamily, member 2 [Source:MGI Symbol;Acc:MGI:99632]	+	gene	overlapping	0	-0.555659	-0.883703	-0.800964	-0.60586
TCONS_00004233	1	15704669	15707168	-	Kcnb2	ENSMUSG00000092083	potassium voltage gated channel, Shab-related subfamily, member 2 [Source:MGI Symbol;Acc:MGI:99632]	+	gene	overlapping	0	-0.555659	-0.883703	-0.800964	-0.529859
TCONS_00000243	1	15707739	15715716	+	Kcnb2	ENSMUSG00000092083	potassium voltage gated channel, Shab-related subfamily, member 2 [Source:MGI Symbol;Acc:MGI:99632]	+	gene	overlapping	0	-0.504991	-0.833035	0.569489	-0.0298587
TCONS_00000247	1	15805606	15845352	+	Terf1	ENSMUSG00000025925	telomeric repeat binding factor 1 [Source:MGI Symbol;Acc:MGI:109634]	+	gene	overlapping	0	6.42917	6.26679	7.25262	6.96913
TCONS_00000250	1	15876345	15878330	+	Gm106	ENSMUSG00000032719	predicted gene 106 [Source:MGI Symbol;Acc:MGI:2684952]	-	gene	overlapping	0	-0.555659	-0.883703	-0.800964	-0.60586
TCONS_00000252	1	15878435	15882936	+	Gm106	ENSMUSG00000032719	predicted gene 106 [Source:MGI Symbol;Acc:MGI:2684952]	-	gene	overlapping	0	-0.504991	-0.833035	-0.800964	-0.529859
TCONS_00004234	1	15897291	15898550	-	null					Not found	0	-0.504991	-0.883703	-0.750297	-0.60586
TCONS_00000255	1	15897356	15897793	+	null					Not found	0	-0.555659	-0.883703	-0.800964	-0.60586
TCONS_00004235	1	15904259	15924543	-	null					Not found	0	0.0233296	-0.304714	-0.0329623	0.546143
TCONS_00000256	1	15905233	15907507	+	null					Not found	0	-0.555659	-0.883703	-0.800964	-0.60586
TCONS_00000257	1	16017088	16024660	+	null					Not found	0	-0.504991	-0.883703	-0.800964	0.0461428
TCONS_00004237	1	16065979	16093325	-	4930444P10Rik	ENSMUSG00000067795	RIKEN cDNA 4930444P10 gene [Source:MGI Symbol;Acc:MGI:1923049]	-	gene	overlapping	0	-0.555659	-0.883703	-0.800964	-0.60586
TCONS_00004239	1	16101295	16105870	-	Rpl7	ENSMUSG00000043716	ribosomal protein L7 [Source:MGI Symbol;Acc:MGI:98073]	-	gene	overlapping	0	5.04587	5.12857	5.4047	5.64106
TCONS_00000259	1	16104684	16134366	+	Rdh10	ENSMUSG00000025921	retinol dehydrogenase 10 (all-trans) [Source:MGI Symbol;Acc:MGI:1924238]	+	gene	overlapping	0	6.23328	6.50683	6.57741	6.74568
TCONS_00000261	1	16174524	16175941	+	null					Not found	0	-0.555659	-0.883703	-0.800964	-0.60586
TCONS_00004240	1	16176318	16178179	-	null					Not found	0	-0.555659	-0.254046	-0.416963	-0.0298587
TCONS_00000262	1	16217104	16217990	+	null					Not found	0	-0.555659	-0.883703	-0.800964	-0.60586
TCONS_00000263	1	16253592	16267958	+	Stau2	ENSMUSG00000025920	staufen (RNA binding protein) homolog 2 (Drosophila) [Source:MGI Symbol;Acc:MGI:1352508]	-	gene	overlapping	0	-0.555659	-0.883703	-0.800964	-0.60586
TCONS_00000265	1	16274101	16275026	+	Stau2	ENSMUSG00000025920	staufen (RNA binding protein) homolog 2 (Drosophila) [Source:MGI Symbol;Acc:MGI:1352508]	-	gene	overlapping	0	-0.555659	-0.883703	-0.800964	-0.60586
TCONS_00004242	1	16342583	16520112	-	Stau2	ENSMUSG00000025920	staufen (RNA binding protein) homolog 2 (Drosophila) [Source:MGI Symbol;Acc:MGI:1352508]	-	gene	overlapping	0	5.77308	5.82677	5.62834	5.64414
TCONS_00004249	1	16540795	16544036	-	null					Not found	0	-0.555659	-0.883703	-0.800964	-0.60586
TCONS_00004250	1	16560676	16562330	-	null					Not found	0	-0.555659	-0.883703	-0.800964	-0.60586
TCONS_00004251	1	16564508	16619489	-	Ube2w	ENSMUSG00000025939	ubiquitin-conjugating enzyme E2W (putative) [Source:MGI Symbol;Acc:MGI:1914049]	-	gene	overlapping	0	6.90916	6.89799	7.29657	7.21716
TCONS_00004253	1	16629092	16630154	-	null					Not found	0	-0.555659	-0.782367	-0.750297	-0.0298587
TCONS_00004256	1	16639514	16657231	-	Tceb1	ENSMUSG00000079658	transcription elongation factor B (SIII), polypeptide 1 [Source:MGI Symbol;Acc:MGI:1915173]	-	gene	overlapping	0	7.34003	7.29281	6.78096	7.33114
TCONS_00000266	1	16641761	16642864	+	Tceb1	ENSMUSG00000079658	transcription elongation factor B (SIII), polypeptide 1 [Source:MGI Symbol;Acc:MGI:1915173]	-	gene	overlapping	0	-0.555659	-0.883703	-0.800964	-0.60586
NOMERGE_TCONS_00000002	1	16657552	16663429	+	Tceb1	ENSMUSG00000079658	transcription elongation factor B (SIII), polypeptide 1 [Source:MGI Symbol;Acc:MGI:1915173]	-	gene	downstream	687	-0.555659	-0.883703	-0.800964	-0.60586
TCONS_00004260	1	16664209	16665054	-	Tmem70	ENSMUSG00000025940	transmembrane protein 70 [Source:MGI Symbol;Acc:MGI:1915068]	+	gene	downstream	153	-0.555659	-0.883703	-0.800964	-0.60586
TCONS_00000270	1	16665091	16678275	+	Tmem70	ENSMUSG00000025940	transmembrane protein 70 [Source:MGI Symbol;Acc:MGI:1915068]	+	gene	overlapping	0	5.70995	5.73934	5.2819	5.60675
TCONS_00004261	1	16680736	16681245	-	null					Not found	0	-0.555659	-0.883703	-0.750297	-0.60586
TCONS_00000273	1	16687578	16709608	+	Ly96	ENSMUSG00000025779	lymphocyte antigen 96 [Source:MGI Symbol;Acc:MGI:1341909]	+	gene	overlapping	0	0.263011	0.0792871	2.01013	-0.0298587
TCONS_00000276	1	16715585	16717012	+	null					Not found	0	-0.555659	-0.883703	-0.800964	-0.60586
TCONS_00004264	1	16737684	16738000	-	null					Not found	0	-0.555659	-0.883703	-0.800964	-0.60586
TCONS_00004265	1	16768270	16770138	-	Gm5828	ENSMUSG00000091020	predicted gene 5828 [Source:MGI Symbol;Acc:MGI:3644176]	-	gene	overlapping	0	-0.555659	-0.883703	-0.800964	-0.60586
TCONS_00000278	1	16794462	16819020	+	null					Not found	0	-0.555659	-0.883703	-0.800964	-0.60586
TCONS_00000279	1	16849112	16850432	+	null					Not found	0	-0.555659	-0.883703	-0.800964	-0.60586
TCONS_00000280	1	16898262	16899193	+	null					Not found	0	-0.555659	-0.883703	-0.800964	-0.60586
TCONS_00000281	1	16899981	16926614	+	null					Not found	0	-0.504991	0.361953	-0.416963	2.20711
TCONS_00004266	1	16901235	16903259	-	null					Not found	0	-0.504991	0.870752	-0.366296	1.83862
TCONS_00000287	1	16936095	16957205	+	null					Not found	0	-0.555659	-0.883703	-0.800964	-0.60586
TCONS_00004267	1	16941371	16942010	-	null					Not found	0	-0.555659	-0.883703	-0.800964	-0.60586
TCONS_00000288	1	16990001	16990525	+	null					Not found	0	-0.504991	-0.883703	-0.800964	-0.0298587
TCONS_00004272	1	16994938	17097897	-	Jph1	ENSMUSG00000042686	junctophilin 1 [Source:MGI Symbol;Acc:MGI:1891495]	-	gene	overlapping	0	-0.12099	1.43225	0.40768	2.55733
TCONS_00000292	1	17097923	17123335	+	Jph1	ENSMUSG00000042686	junctophilin 1 [Source:MGI Symbol;Acc:MGI:1891495]	-	gene	downstream	34	0.0233296	1.85326	0.212693	0.0461428
TCONS_00004273	1	17101227	17104129	-	null					Not found	0	-0.555659	-0.883703	-0.800964	-0.529859
TCONS_00000293	1	17145362	17164280	+	Gdap1	ENSMUSG00000025777	ganglioside-induced differentiation-associated-protein 1 [Source:MGI Symbol;Acc:MGI:1338002]	+	gene	overlapping	0	7.6507	7.72974	7.89897	8.00484
TCONS_00000295	1	17167428	17168054	+	null					Not found	0	-0.555659	-0.883703	-0.800964	-0.60586
TCONS_00000296	1	17168221	17173107	+	null					Not found	0	4.06259	4.7637	4.28139	5.25084
TCONS_00000300	1	17304459	17308814	+	null					Not found	0	-0.555659	-0.883703	-0.800964	-0.60586
TCONS_00004274	1	17317354	17319617	-	null					Not found	0	-0.555659	-0.883703	-0.800964	-0.60586
TCONS_00000302	1	17374338	17395628	+	null					Not found	0	-0.504991	-0.449034	-0.750297	1.04614
TCONS_00000304	1	17601901	17630938	+	Pi15	ENSMUSG00000067780	peptidase inhibitor 15 [Source:MGI Symbol;Acc:MGI:1934659]	+	gene	overlapping	0	-0.555659	-0.883703	-0.800964	-0.60586
TCONS_00004275	1	17636009	17639730	-	null					Not found	0	-0.555659	-0.833035	-0.800964	-0.60586
TCONS_00004276	1	17662284	17663158	-	null					Not found	0	-0.555659	-0.883703	-0.800964	-0.60586
TCONS_00004277	1	17676027	17727646	-	Gm16070	ENSMUSG00000085125	predicted gene 16070 [Source:MGI Symbol;Acc:MGI:3801761]	-	gene	overlapping	0	-0.555659	-0.883703	-0.800964	-0.60586
TCONS_00000305	1	17727045	17765575	+	Gm16070	ENSMUSG00000085125	predicted gene 16070 [Source:MGI Symbol;Acc:MGI:3801761]	-	gene	overlapping	0	-0.555659	-0.833035	-0.800964	0.262623
TCONS_00004279	1	17840857	17842107	-	null					Not found	0	-0.555659	-0.883703	-0.800964	-0.0298587
TCONS_00004280	1	17923166	17924241	-	null					Not found	0	-0.504991	-0.883703	-0.800964	-0.60586
TCONS_00004285	1	17995397	18036083	-	null					Not found	0	0.740664	1.37561	0.546026	-0.60586
TCONS_00000307	1	18039420	18039743	+	null					Not found	0	-0.555659	-0.883703	-0.800964	-0.60586
TCONS_00004288	1	18250915	18265138	-	Defb41	ENSMUSG00000067773	defensin beta 41 [Source:MGI Symbol;Acc:MGI:1924923]	-	gene	overlapping	0	0.268985	-0.304714	1.39413	-0.529859
TCONS_00000308	1	18335754	18339674	+	null					Not found	0	-0.555659	-0.304714	-0.800964	-0.60586
TCONS_00004290	1	18622656	18623403	-	null					Not found	0	-0.555659	-0.883703	-0.800964	-0.60586
TCONS_00004291	1	18629443	18630084	-	null					Not found	0	-0.555659	-0.883703	-0.800964	-0.60586
TCONS_00004292	1	18636375	18637619	-	null					Not found	0	-0.555659	-0.883703	-0.800964	-0.60586
TCONS_00004293	1	18641885	18644829	-	null					Not found	0	0.407331	-0.449034	2.56566	2.3535
TCONS_00000312	1	18764146	18765181	+	null					Not found	0	-0.555659	-0.883703	-0.800964	-0.60586
TCONS_00000313	1	18780015	18786176	+	null					Not found	0	-0.555659	-0.883703	-0.800964	-0.60586
TCONS_00000316	1	18792319	18799156	+	null					Not found	0	-0.555659	-0.883703	-0.800964	-0.60586
TCONS_00000318	1	18802042	18802688	+	null					Not found	0	-0.555659	-0.883703	-0.800964	-0.60586
TCONS_00000319	1	18962511	18964417	+	null					Not found	0	-0.555659	-0.883703	-0.800964	-0.60586
TCONS_00004294	1	19015656	19018302	-	null					Not found	0	-0.555659	-0.833035	-0.750297	-0.60586
TCONS_00000320	1	19030289	19030976	+	null					Not found	0	1.56531	1.37561	0.351039	1.49959
TCONS_00004296	1	19153310	19155668	-	Tfap2d	ENSMUSG00000042596	transcription factor AP-2, delta [Source:MGI Symbol;Acc:MGI:2153466]	+	gene	overlapping	0	-0.555659	-0.883703	-0.800964	-0.60586
TCONS_00004298	1	19167800	19174842	-	Tfap2d	ENSMUSG00000042596	transcription factor AP-2, delta [Source:MGI Symbol;Acc:MGI:2153466]	+	gene	upstream	1454	-0.171658	-0.883703	-0.800964	-0.60586
TCONS_00004304	1	19178101	19185246	-	null					Not found	0	3.98065	4.26642	3.60392	4.89982
TCONS_00000321	1	19208782	19238734	+	Tfap2b	ENSMUSG00000025927	transcription factor AP-2 beta [Source:MGI Symbol;Acc:MGI:104672]	+	gene	overlapping	0	4.15027	3.61369	4.30094	5.10041
TCONS_00000324	1	19242891	19290620	+	null					Not found	0	-0.171658	-0.833035	-0.171308	-0.529859
TCONS_00000329	1	19309481	19315838	+	null					Not found	0	-0.504991	0.324942	-0.12064	0.838624
TCONS_00000333	1	19317016	19339702	+	null					Not found	0	4.07525	4.43556	4.15421	4.01886
TCONS_00004310	1	20057779	20618064	-	Pkhd1	ENSMUSG00000043760	polycystic kidney and hepatic disease 1 [Source:MGI Symbol;Acc:MGI:2155808]	-	gene	overlapping	0	3.62195	4.00234	3.86292	4.79706
NOMERGE_TCONS_00000003	1	20381093	20392300	+	Pkhd1	ENSMUSG00000043760	polycystic kidney and hepatic disease 1 [Source:MGI Symbol;Acc:MGI:2155808]	-	gene	overlapping	0	-0.555659	-0.883703	-0.800964	-0.60586
TCONS_00004324	1	20777151	20790607	-	Il17f	ENSMUSG00000041872	interleukin 17F [Source:MGI Symbol;Acc:MGI:2676631]	-	gene	overlapping	0	7.24991	7.22852	6.37758	6.63625
TCONS_00004327	1	20802527	20820379	-	Mcm3	ENSMUSG00000041859	minichromosome maintenance deficient 3 (S. cerevisiae) [Source:MGI Symbol;Acc:MGI:101845]	-	gene	overlapping	0	6.95662	7.17276	6.87492	7.32726
TCONS_00004329	1	20825412	20836928	-	null					Not found	0	-0.555659	-0.883703	-0.750297	-0.60586
TCONS_00000342	1	20836451	20840324	+	null					Not found	0	0.407331	0.870752	0.653336	-0.0298587
TCONS_00004331	1	20838152	20840318	-	null					Not found	0	-0.555659	-0.883703	-0.800964	-0.60586
TCONS_00000343	1	20840472	20939629	+	SNORA17	ENSMUSG00000088858	Small nucleolar RNA SNORA17 [Source:RFAM;Acc:RF00560]	-	gene	overlapping	0	2.03699	1.4732	1.6768	1.04614
TCONS_00000348	1	20951640	20990838	+	Efhc1	ENSMUSG00000041809	EF-hand domain (C-terminal) containing 1 [Source:MGI Symbol;Acc:MGI:1919127]	+	gene	overlapping	0	0.814795	-0.304714	-0.221976	0.0461428
TCONS_00004334	1	20996296	21079229	-	Tram2	ENSMUSG00000041779	translocating chain-associating membrane protein 2 [Source:MGI Symbol;Acc:MGI:1924817]	-	gene	overlapping	0	3.42193	3.58649	3.16811	2.53478
TCONS_00000352	1	21031736	21032624	+	Tram2	ENSMUSG00000041779	translocating chain-associating membrane protein 2 [Source:MGI Symbol;Acc:MGI:1924817]	-	gene	overlapping	0	-0.555659	-0.883703	-0.800964	-0.60586
TCONS_00000353	1	21109382	21110067	+	null					Not found	0	-0.555659	-0.883703	-0.800964	-0.60586
TCONS_00004344	1	21156714	21158509	-	null					Not found	0	-0.555659	-0.883703	-0.800964	-0.529859
TCONS_00000354	1	21166414	21230167	+	Tmem14a	ENSMUSG00000025933	transmembrane protein 14A [Source:MGI Symbol;Acc:MGI:1922962]	+	gene	overlapping	0	0.161676	0.940941	1.39413	0.707107
TCONS_00004345	1	21189008	21194913	-	null					Not found	0	-0.12099	0.991609	-0.0329622	1.13111
TCONS_00004346	1	21236163	21236376	-	null					Not found	0	-0.555659	-0.883703	-0.800964	-0.60586
TCONS_00000359	1	21240589	21265361	+	Gsta3	ENSMUSG00000025934	glutathione S-transferase, alpha 3 [Source:MGI Symbol;Acc:MGI:95856]	+	gene	overlapping	0	-0.504991	-0.883703	-0.800964	-0.60586
TCONS_00000360	1	21272338	21273082	+	AC163025.1	ENSMUSG00000096375	Protein Cetn4 [Source:UniProtKB/TrEMBL;Acc:E9PVN5]	+	gene	overlapping	0	-0.555659	-0.883703	-0.800964	-0.60586
TCONS_00004351	1	21285246	21302413	-	null					Not found	0	-0.555659	-0.782367	-0.800964	-0.529859
TCONS_00004355	1	21302568	21303072	-	null					Not found	0	-0.555659	-0.883703	-0.800964	-0.60586
TCONS_00004356	1	21306327	21306912	-	null					Not found	0	-0.555659	-0.883703	-0.800964	-0.60586
TCONS_00004359	1	21310325	21314441	-	null					Not found	0	-0.555659	-0.883703	-0.800964	-0.60586
TCONS_00004364	1	21317095	21325406	-	null					Not found	0	-0.555659	-0.833035	-0.800964	-0.60586
TCONS_00004367	1	21328407	21332017	-	null					Not found	0	-0.555659	-0.883703	-0.800964	-0.60586
TCONS_00004368	1	21334546	21334845	-	null					Not found	0	-0.555659	-0.883703	-0.800964	-0.60586
TCONS_00004369	1	21346513	21347491	-	null					Not found	0	-0.555659	-0.883703	-0.800964	-0.60586
TCONS_00000361	1	21347872	21349318	+	Khdc1a	ENSMUSG00000067750	KH domain containing 1A [Source:MGI Symbol;Acc:MGI:2676610]	+	gene	downstream	323	-0.555659	-0.883703	-0.800964	-0.60586
TCONS_00000363	1	21349452	21352200	+	Khdc1a	ENSMUSG00000067750	KH domain containing 1A [Source:MGI Symbol;Acc:MGI:2676610]	+	gene	overlapping	0	6.38066	6.68034	6.37049	6.74461
TCONS_00000364	1	21354005	21386373	+	Khdc1c	ENSMUSG00000041722	KH domain containing 1C [Source:MGI Symbol;Acc:MGI:3583007]	+	gene	overlapping	0	9.84242	9.7476	9.84983	10.1417
CUFF.6274.1	1	21360433	21361231	-	null					Not found	0	-0.504991	-0.883703	-0.416963	-0.60586
CUFF.6275.1	1	21371493	21374124	-	Khdc1c	ENSMUSG00000041722	KH domain containing 1C [Source:MGI Symbol;Acc:MGI:3583007]	+	gene	upstream	648	-0.171658	-0.833035	-0.800964	-0.60586
CUFF.6278.1	1	21379368	21383466	-	Khdc1b	ENSMUSG00000085079	KH domain containing 1B [Source:MGI Symbol;Acc:MGI:2138477]	+	gene	downstream	90	-0.555659	-0.883703	-0.800964	-0.60586
TCONS_00004370	1	21402507	21855902	-	Kcnq5	ENSMUSG00000028033	potassium voltage-gated channel, subfamily Q, member 5 [Source:MGI Symbol;Acc:MGI:1924937]	-	gene	overlapping	0	1.31965	2.40899	2.62761	3.03478
TCONS_00000371	1	21899269	21899951	+	Kcnq5	ENSMUSG00000028033	potassium voltage-gated channel, subfamily Q, member 5 [Source:MGI Symbol;Acc:MGI:1924937]	-	gene	overlapping	0	-0.555659	-0.883703	-0.800964	-0.60586
TCONS_00000375	1	21900184	21924553	+	Kcnq5	ENSMUSG00000028033	potassium voltage-gated channel, subfamily Q, member 5 [Source:MGI Symbol;Acc:MGI:1924937]	-	gene	overlapping	0	-0.504991	0.268301	-0.800964	2.11078
TCONS_00004376	1	21939429	21943643	-	Kcnq5	ENSMUSG00000028033	potassium voltage-gated channel, subfamily Q, member 5 [Source:MGI Symbol;Acc:MGI:1924937]	-	gene	overlapping	0	-0.555659	-0.883703	-0.800964	-0.60586
TCONS_00004379	1	21947487	21953066	-	Kcnq5	ENSMUSG00000028033	potassium voltage-gated channel, subfamily Q, member 5 [Source:MGI Symbol;Acc:MGI:1924937]	-	gene	overlapping	0	-0.555659	-0.883703	-0.800964	-0.60586
TCONS_00004381	1	21956942	21958410	-	Kcnq5	ENSMUSG00000028033	potassium voltage-gated channel, subfamily Q, member 5 [Source:MGI Symbol;Acc:MGI:1924937]	-	gene	overlapping	0	-0.555659	-0.883703	-0.800964	-0.60586
TCONS_00000379	1	21959842	21968534	+	Kcnq5	ENSMUSG00000028033	potassium voltage-gated channel, subfamily Q, member 5 [Source:MGI Symbol;Acc:MGI:1924937]	-	gene	overlapping	0	-0.555659	-0.883703	-0.800964	-0.60586
TCONS_00004382	1	22045232	22137358	-	null					Not found	0	-0.555659	-0.883703	-0.800964	-0.60586
TCONS_00004383	1	22147210	22147887	-	null					Not found	0	-0.555659	-0.883703	-0.800964	-0.60586
TCONS_00004384	1	22151194	22152160	-	null					Not found	0	-0.555659	-0.883703	-0.800964	-0.60586
TCONS_00000383	1	22247855	22248522	+	null					Not found	0	-0.555659	-0.883703	-0.800964	-0.60586
TCONS_00004396	1	22285968	22805994	-	Rims1	ENSMUSG00000041670	regulating synaptic membrane exocytosis 1 [Source:MGI Symbol;Acc:MGI:2152971]	-	gene	overlapping	0	6.39907	6.00568	6.63879	5.58655
TCONS_00000385	1	22831242	22833960	+	null					Not found	0	-0.555659	-0.883703	-0.800964	-0.60586
TCONS_00000386	1	22836803	22837936	+	null					Not found	0	-0.555659	-0.883703	-0.800964	-0.60586
TCONS_00000387	1	22898313	22901385	+	null					Not found	0	-0.555659	-0.883703	-0.800964	-0.60586
TCONS_00000390	1	22903245	22908756	+	null					Not found	0	1.12467	0.903931	1.32	2.04614
TCONS_00000392	1	22923494	22924591	+	null					Not found	0	-0.555659	-0.883703	-0.800964	-0.60586
TCONS_00000393	1	23259418	23293278	+	Mir30a	ENSMUSG00000065405	microRNA 30a [Source:MGI Symbol;Acc:MGI:2676907]	+	gene	overlapping	0	-0.555659	-0.833035	-0.800964	-0.60586
TCONS_00004401	1	23323679	23324018	-	null					Not found	0	-0.555659	-0.883703	-0.800964	-0.60586
TCONS_00004403	1	23366424	23383188	-	Ogfrl1	ENSMUSG00000026158	opioid growth factor receptor-like 1 [Source:MGI Symbol;Acc:MGI:1917405]	-	gene	overlapping	0	1.63944	2.46329	2.44617	2.89636
TCONS_00004405	1	23548702	23638483	-	null					Not found	0	-0.555659	-0.883703	-0.800964	-0.60586
TCONS_00000407	1	23621769	23624548	+	null					Not found	0	-0.555659	-0.883703	-0.800964	-0.60586
NOMERGE_TCONS_00000005	1	23761753	23849158	+	B3gat2	ENSMUSG00000026156	beta-1,3-glucuronyltransferase 2 (glucuronosyltransferase S) [Source:MGI Symbol;Acc:MGI:2389490]	+	gene	overlapping	0	2.39378	1.32494	2.16811	2.86082
TCONS_00004409	1	23843242	23922394	-	B3gat2	ENSMUSG00000026156	beta-1,3-glucuronyltransferase 2 (glucuronosyltransferase S) [Source:MGI Symbol;Acc:MGI:2389490]	+	gene	overlapping	0	7.35244	7.50161	7.37093	7.10026
TCONS_00004414	1	23995939	24005656	-	1110058L19Rik	ENSMUSG00000026154	RIKEN cDNA 1110058L19 gene [Source:MGI Symbol;Acc:MGI:1915252]	-	gene	overlapping	0	5.19122	5.57908	3.32	5.20315
NOMERGE_TCONS_00000007	1	24005505	24005894	+	1110058L19Rik	ENSMUSG00000026154	RIKEN cDNA 1110058L19 gene [Source:MGI Symbol;Acc:MGI:1915252]	-	gene	overlapping	0	-0.555659	-0.883703	-0.800964	-0.60586
TCONS_00004421	1	24010758	24100341	-	Fam135a	ENSMUSG00000026153	family with sequence similarity 135, member A [Source:MGI Symbol;Acc:MGI:1915437]	-	gene	overlapping	0	4.73917	4.60612	4.44211	4.42858
TCONS_00000408	1	24132733	24135600	+	null					Not found	0	-0.555659	-0.883703	-0.800964	-0.60586
TCONS_00004427	1	24259427	24452745	-	Col19a1	ENSMUSG00000026141	collagen, type XIX, alpha 1 [Source:MGI Symbol;Acc:MGI:1095415]	-	gene	overlapping	0	0.481462	1.32494	0.684372	0.0461428
TCONS_00000409	1	24376497	24412790	+	Col19a1	ENSMUSG00000026141	collagen, type XIX, alpha 1 [Source:MGI Symbol;Acc:MGI:1095415]	-	gene	overlapping	0	-0.555659	-0.833035	-0.750297	-0.60586
CUFF.413.1	1	24414161	24415693	+	Col19a1	ENSMUSG00000026141	collagen, type XIX, alpha 1 [Source:MGI Symbol;Acc:MGI:1095415]	-	gene	overlapping	0	-0.555659	-0.883703	-0.800964	-0.60586
TCONS_00000410	1	24462460	24467831	+	Col19a1	ENSMUSG00000026141	collagen, type XIX, alpha 1 [Source:MGI Symbol;Acc:MGI:1095415]	-	gene	overlapping	0	-0.504991	-0.883703	-0.800964	-0.60586
TCONS_00000412	1	24472400	24473150	+	Col19a1	ENSMUSG00000026141	collagen, type XIX, alpha 1 [Source:MGI Symbol;Acc:MGI:1095415]	-	gene	overlapping	0	-0.555659	-0.883703	-0.800964	-0.60586
TCONS_00000413	1	24479217	24481857	+	Col19a1	ENSMUSG00000026141	collagen, type XIX, alpha 1 [Source:MGI Symbol;Acc:MGI:1095415]	-	gene	overlapping	0	-0.504991	-0.883703	-0.800964	-0.60586
TCONS_00004431	1	24613710	24615134	-	Gm10222	ENSMUSG00000067736	predicted gene 10222 [Source:MGI Symbol;Acc:MGI:3642643]	-	gene	downstream	1010	0.0739973	-0.304714	-0.800964	-0.60586
TCONS_00004433	1	24646666	24647028	-	null					Not found	0	-0.555659	-0.883703	-0.800964	-0.60586
TCONS_00000419	1	24678538	24766299	+	Lmbrd1	ENSMUSG00000073725	LMBR1 domain containing 1 [Source:MGI Symbol;Acc:MGI:1915671]	+	gene	overlapping	0	5.26351	5.26509	5.08411	5.29207
TCONS_00004437	1	24814517	24833986	-	null					Not found	0	0.319653	1.32494	0.546026	1.63111
TCONS_00004445	1	25067476	25829827	-	Bai3	ENSMUSG00000033569	brain-specific angiogenesis inhibitor 3 [Source:MGI Symbol;Acc:MGI:2441837]	-	gene	overlapping	0	4.56581	4.84902	3.99227	4.59252
TCONS_00000424	1	25180555	25187747	+	Bai3	ENSMUSG00000033569	brain-specific angiogenesis inhibitor 3 [Source:MGI Symbol;Acc:MGI:2441837]	-	gene	overlapping	0	0.407331	-0.833035	1.21269	0.546143
CUFF.440.1	1	25224680	25224786	+	Bai3	ENSMUSG00000033569	brain-specific angiogenesis inhibitor 3 [Source:MGI Symbol;Acc:MGI:2441837]	-	gene	overlapping	0	-0.555659	-0.883703	-0.366296	-0.453857
TCONS_00000426	1	25476901	25502212	+	Bai3	ENSMUSG00000033569	brain-specific angiogenesis inhibitor 3 [Source:MGI Symbol;Acc:MGI:2441837]	-	gene	overlapping	0	1.65299	0.991609	1.21269	1.49959
TCONS_00004448	1	25915676	25916721	-	null					Not found	0	-0.555659	-0.883703	-0.800964	-0.60586
TCONS_00000431	1	25933588	25979866	+	null					Not found	0	-0.555659	-0.883703	-0.800964	-0.60586
TCONS_00000432	1	26117726	26125015	+	null					Not found	0	0.935651	3.34457	1.28682	5.19575
TCONS_00000436	1	26243155	26243791	+	null					Not found	0	-0.555659	-0.883703	-0.800964	-0.60586
TCONS_00000439	1	26251220	26299969	+	null					Not found	0	-0.555659	-0.449034	-0.800964	-0.0298587
TCONS_00000453	1	26304785	26326459	+	null					Not found	0	-0.504991	-0.499701	-0.800964	-0.60586
TCONS_00000458	1	26333899	26336042	+	null					Not found	0	-0.555659	-0.883703	-0.800964	-0.60586
TCONS_00000459	1	26338587	26339727	+	null					Not found	0	-0.555659	-0.883703	-0.800964	-0.60586
TCONS_00000461	1	26498470	26510133	+	null					Not found	0	-0.171658	-0.833035	0.0177054	2.04614
TCONS_00000463	1	26946648	26962598	+	AC157803.1	ENSMUSG00000095256	No description	-	gene	overlapping	0	-0.555659	-0.833035	-0.800964	-0.60586
TCONS_00000471	1	26966948	26968171	+	null					Not found	0	-0.555659	-0.883703	-0.800964	-0.60586
TCONS_00000472	1	27068670	27070177	+	null					Not found	0	-0.555659	-0.883703	-0.750297	-0.529859
TCONS_00000474	1	27503939	27530806	+	null					Not found	0	-0.555659	-0.499701	-0.800964	-0.529859
TCONS_00004453	1	27817374	27817780	-	null					Not found	0	-0.555659	-0.883703	-0.800964	-0.60586
TCONS_00004459	1	27932453	27961748	-	null					Not found	0	1.12467	0.274275	1.21269	0.338624
TCONS_00004462	1	28226761	28228105	-	null					Not found	0	-0.555659	-0.883703	-0.800964	-0.60586
TCONS_00004463	1	28231286	28231822	-	null					Not found	0	-0.555659	-0.883703	-0.800964	-0.60586
TCONS_00004471	1	28234909	28249628	-	null					Not found	0	-0.555659	-0.833035	-0.800964	-0.60586
TCONS_00004473	1	28310133	28312025	-	null					Not found	0	-0.555659	-0.883703	-0.800964	-0.60586
TCONS_00004476	1	28317991	28322342	-	null					Not found	0	-0.555659	-0.883703	-0.800964	-0.529859
TCONS_00004477	1	28325866	28344788	-	null					Not found	0	-0.555659	-0.883703	-0.800964	-0.60586
TCONS_00004483	1	28800238	28802721	-	null					Not found	0	0.0739974	0.51993	0.351039	1.20711
TCONS_00000476	1	28889155	28894961	+	null					Not found	0	-0.555659	-0.883703	-0.800964	-0.60586
TCONS_00000481	1	28936024	28943022	+	Gm6462	ENSMUSG00000058590	predicted gene 6462 [Source:MGI Symbol;Acc:MGI:3647053]	+	gene	overlapping	0	-0.555659	-0.883703	-0.800964	-0.529859
TCONS_00004487	1	29468553	29478772	-	null					Not found	0	-0.504991	-0.883703	-0.750297	-0.60586
TCONS_00004490	1	29483754	29488990	-	null					Not found	0	-0.555659	-0.883703	-0.800964	-0.60586
TCONS_00004492	1	29601988	29604638	-	null					Not found	0	-0.555659	-0.833035	-0.800964	1.70711
TCONS_00004494	1	29612044	29641042	-	null					Not found	0	-0.555659	-0.883703	-0.800964	-0.529859
TCONS_00000487	1	29699999	29703473	+	null					Not found	0	1.12467	1.70894	0.936001	1.13111
TCONS_00004498	1	30258666	30262664	-	null					Not found	0	-0.555659	-0.883703	-0.800964	-0.60586
TCONS_00000489	1	30383191	30387248	+	null					Not found	0	-0.504991	0.903931	-0.750297	1.70711
TCONS_00000490	1	30573233	30578470	+	null					Not found	0	-0.555659	0.0792871	-0.750297	-0.60586
TCONS_00004500	1	30584003	30584405	-	null					Not found	0	-0.555659	-0.883703	-0.800964	-0.60586
TCONS_00004501	1	30633687	30650666	-	null					Not found	0	-0.555659	-0.883703	-0.800964	-0.60586
TCONS_00004505	1	30673609	30682609	-	null					Not found	0	2.6038	2.41387	2.35849	5.08455
TCONS_00004508	1	30718554	30719961	-	Gm9898	ENSMUSG00000053185	predicted gene 9898 [Source:MGI Symbol;Acc:MGI:3642391]	-	gene	overlapping	0	-0.504991	0.0792871	-0.800964	-0.529859
TCONS_00004513	1	30802342	30874290	-	Phf3	ENSMUSG00000048874	PHD finger protein 3 [Source:MGI Symbol;Acc:MGI:2446126]	-	gene	overlapping	0	9.99925	9.9608	10.1303	9.94711
TCONS_00004514	1	30887645	30888004	-	null					Not found	0	-0.555659	-0.883703	-0.800964	-0.60586
TCONS_00004518	1	30896356	30900954	-	null					Not found	0	-0.504991	-0.782367	-0.315628	0.470141
TCONS_00004522	1	30940303	30949785	-	Ptp4a1	ENSMUSG00000026064	protein tyrosine phosphatase 4a1 [Source:MGI Symbol;Acc:MGI:1277096]	-	gene	overlapping	0	0.0233296	0.41262	0.848323	1.33862
TCONS_00000494	1	31005320	31011143	+	null					Not found	0	-0.555659	-0.883703	-0.800964	-0.60586
TCONS_00000500	1	31016485	31017098	+	null					Not found	0	-0.555659	-0.883703	-0.800964	-0.60586
TCONS_00000501	1	31028078	31046026	+	null					Not found	0	1.26301	2.13121	-0.0329623	0.94982
TCONS_00004523	1	31117767	31135237	-	null					Not found	0	-0.555659	-0.883703	-0.800964	-0.60586
TCONS_00004524	1	31136822	31222911	-	4931428L18Rik	ENSMUSG00000086727	RIKEN cDNA 4931428L18 gene [Source:MGI Symbol;Acc:MGI:1918238]	-	gene	overlapping	0	8.29701	8.0876	7.46691	8.32641
TCONS_00000513	1	31176406	31204656	+	4931428L18Rik	ENSMUSG00000086727	RIKEN cDNA 4931428L18 gene [Source:MGI Symbol;Acc:MGI:1918238]	-	gene	overlapping	0	-0.555659	-0.883703	-0.221976	-0.60586
TCONS_00000514	1	31222839	31224287	+	4930521A18Rik	ENSMUSG00000026063	RIKEN cDNA 4930521A18 gene [Source:MGI Symbol;Acc:MGI:1921958]	+	gene	overlapping	0	-0.555659	-0.883703	-0.800964	-0.60586
TCONS_00000515	1	31339380	31341666	+	null					Not found	0	-0.555659	-0.883703	-0.800964	-0.60586
TCONS_00000516	1	31343871	31362711	+	null					Not found	0	-0.555659	-0.883703	-0.800964	-0.60586
TCONS_00000517	1	31366840	31369129	+	null					Not found	0	-0.555659	-0.883703	-0.750297	-0.60586
TCONS_00004535	1	31535440	31537445	-	null					Not found	0	-0.555659	-0.883703	-0.800964	-0.60586
TCONS_00000521	1	31615458	31616858	+	Gm10307	ENSMUSG00000070960	predicted gene 10307 [Source:MGI Symbol;Acc:MGI:3642371]	+	gene	overlapping	0	0.596344	1.64473	-0.0836299	0.546143
TCONS_00004537	1	31771176	31772668	-	null					Not found	0	-0.555659	-0.883703	-0.800964	-0.529859
TCONS_00000523	1	31826170	31826347	+	null					Not found	0	-0.504991	-0.883703	-0.800964	-0.60586
TCONS_00004548	1	32035287	32036236	-	null					Not found	0	-0.555659	-0.883703	-0.800964	-0.60586
TCONS_00000528	1	32074562	32075377	+	null					Not found	0	-0.555659	-0.883703	-0.800964	-0.60586
TCONS_00000530	1	32172806	32658728	+	Khdrbs2	ENSMUSG00000026058	KH domain containing, RNA binding, signal transduction associated 2 [Source:MGI Symbol;Acc:MGI:2159649]	+	gene	overlapping	0	0.929678	2.32494	0.351039	3.18884
TCONS_00004549	1	32871885	32881981	-	null					Not found	0	2.51464	3.75109	2.08426	3.78603
TCONS_00004552	1	32932714	33211817	-	U6	ENSMUSG00000088750	U6 spliceosomal RNA [Source:RFAM;Acc:RF00026]	+	gene	overlapping	0	3.11198	3.91323	2.0608	3.56834
TCONS_00000541	1	33284339	33286048	+	null					Not found	0	-0.555659	-0.833035	-0.416963	-0.60586
TCONS_00000543	1	33353706	33356982	+	null					Not found	0	-0.555659	-0.833035	-0.800964	-0.0298587
TCONS_00004570	1	33453811	33669866	-	Prim2	ENSMUSG00000026134	DNA primase, p58 subunit [Source:MGI Symbol;Acc:MGI:97758]	-	gene	overlapping	0	6.80188	6.67224	6.21119	6.54257
TCONS_00000545	1	33669827	33671049	+	1700001G17Rik	ENSMUSG00000044744	RIKEN cDNA 1700001G17 gene [Source:MGI Symbol;Acc:MGI:1914753]	+	gene	overlapping	0	-0.555659	-0.833035	-0.416963	-0.0298587
TCONS_00004571	1	33713409	33714302	-	null					Not found	0	-0.555659	-0.883703	-0.800964	-0.60586
TCONS_00000546	1	33719717	33742564	+	Rab23	ENSMUSG00000004768	RAB23, member RAS oncogene family [Source:MGI Symbol;Acc:MGI:99833]	+	gene	overlapping	0	5.59056	5.51506	5.63226	5.27175
TCONS_00004572	1	33745484	33757794	-	Bag2	ENSMUSG00000042215	BCL2-associated athanogene 2 [Source:MGI Symbol;Acc:MGI:1891254]	-	gene	overlapping	0	-0.555659	-0.499701	-0.800964	-0.60586
TCONS_00004576	1	33761544	33814989	-	Zfp451	ENSMUSG00000042197	zinc finger protein 451 [Source:MGI Symbol;Acc:MGI:2137896]	-	gene	overlapping	0	7.5377	7.67892	7.85575	8.02119
TCONS_00000548	1	33815448	33815741	+	Zfp451	ENSMUSG00000042197	zinc finger protein 451 [Source:MGI Symbol;Acc:MGI:2137896]	-	gene	downstream	853	-0.555659	-0.883703	-0.800964	-0.60586
TCONS_00004579	1	33835899	33839342	-	null					Not found	0	-0.555659	-0.883703	-0.800964	1.33862
TCONS_00000549	1	33849453	33849713	+	null					Not found	0	-0.555659	-0.883703	-0.800964	-0.60586
TCONS_00000550	1	33850073	33863251	+	Bend6	ENSMUSG00000042182	BEN domain containing 6 [Source:MGI Symbol;Acc:MGI:2444572]	-	gene	overlapping	0	1.98632	0.991609	1.07435	0.262623
TCONS_00004580	1	33851938	33907816	-	Bend6	ENSMUSG00000042182	BEN domain containing 6 [Source:MGI Symbol;Acc:MGI:2444572]	-	gene	overlapping	0	0.0233297	-0.833035	-0.750297	0.838624
TCONS_00000556	1	33907809	34308658	+	Bend6	ENSMUSG00000042182	BEN domain containing 6 [Source:MGI Symbol;Acc:MGI:2444572]	-	gene	overlapping	0	8.32899	8.65089	8.36521	8.65399
TCONS_00000567	1	34330514	34332138	+	null					Not found	0	-0.555659	-0.883703	-0.800964	-0.60586
TCONS_00000570	1	34357439	34408834	+	null					Not found	0	-0.504991	1.76559	-0.0329622	0.470141
TCONS_00004586	1	34366103	34377946	-	null					Not found	0	-0.171658	0.0792871	-0.800964	-0.60586
TCONS_00004587	1	34432442	34433789	-	Mir5103	ENSMUSG00000092852	microRNA 5103 [Source:MGI Symbol;Acc:MGI:4950423]	-	gene	overlapping	0	-0.555659	-0.883703	-0.800964	-0.60586
TCONS_00000581	1	34435539	34436221	+	Ccdc115	ENSMUSG00000042111	coiled-coil domain containing 115 [Source:MGI Symbol;Acc:MGI:1916918]	-	gene	upstream	450	-0.555659	-0.883703	-0.800964	-0.60586
TCONS_00004591	1	34436671	34439703	-	Ccdc115	ENSMUSG00000042111	coiled-coil domain containing 115 [Source:MGI Symbol;Acc:MGI:1916918]	-	gene	overlapping	0	7.35554	7.42432	8.09406	7.62781
TCONS_00000582	1	34439581	34445736	+	Ccdc115	ENSMUSG00000042111	coiled-coil domain containing 115 [Source:MGI Symbol;Acc:MGI:1916918]	-	gene	overlapping	0	6.03144	6.35845	5.79666	6.30731
TCONS_00004592	1	34446498	34447527	-	Imp4	ENSMUSG00000026127	IMP4, U3 small nucleolar ribonucleoprotein, homolog (yeast) [Source:MGI Symbol;Acc:MGI:106572]	+	gene	upstream	762	-0.555659	-0.883703	-0.800964	-0.60586
TCONS_00004594	1	34451876	34453077	-	null					Not found	0	-0.555659	-0.883703	-0.800964	-0.60586
TCONS_00004596	1	34457019	34459125	-	Ptpn18	ENSMUSG00000026126	protein tyrosine phosphatase, non-receptor type 18 [Source:MGI Symbol;Acc:MGI:108410]	+	gene	downstream	621	-0.555659	-0.883703	-0.800964	-0.60586
TCONS_00000583	1	34459714	34473780	+	Ptpn18	ENSMUSG00000026126	protein tyrosine phosphatase, non-receptor type 18 [Source:MGI Symbol;Acc:MGI:108410]	+	gene	overlapping	0	5.70556	6.25184	6.07096	6.34882
TCONS_00000587	1	34516853	34544311	+	Cfc1	ENSMUSG00000026124	cripto, FRL-1, cryptic family 1 [Source:MGI Symbol;Acc:MGI:109448]	+	gene	overlapping	0	-0.555659	-0.1157	-0.800964	-0.60586
TCONS_00004598	1	34543975	34560943	-	Cfc1	ENSMUSG00000026124	cripto, FRL-1, cryptic family 1 [Source:MGI Symbol;Acc:MGI:109448]	+	gene	overlapping	0	-0.504991	-0.883703	-0.800964	-0.60586
TCONS_00000589	1	34553796	34555154	+	Prss40	ENSMUSG00000037529	protease, serine, 40 [Source:MGI Symbol;Acc:MGI:1270857]	-	gene	overlapping	0	-0.555659	-0.883703	-0.800964	-0.60586
TCONS_00004601	1	34630758	34636908	-	null					Not found	0	6.60154	6.31761	6.67429	6.17284
TCONS_00000590	1	34698736	34700059	+	C230030N03Rik	ENSMUSG00000089955	RIKEN cDNA C230030N03 gene [Source:MGI Symbol;Acc:MGI:3045297]	+	gene	overlapping	0	-0.555659	-0.883703	-0.800964	0.546143
TCONS_00004602	1	34745950	34746467	-	Arhgef4	ENSMUSG00000037509	Rho guanine nucleotide exchange factor (GEF) 4 [Source:MGI Symbol;Acc:MGI:2442507]	+	gene	overlapping	0	-0.555659	-0.883703	-0.800964	-0.60586
TCONS_00000591	1	34750554	34813309	+	Arhgef4	ENSMUSG00000037509	Rho guanine nucleotide exchange factor (GEF) 4 [Source:MGI Symbol;Acc:MGI:2442507]	+	gene	overlapping	0	3.20625	3.81005	2.50281	1.77586
TCONS_00004604	1	34813219	34843080	-	Arhgef4	ENSMUSG00000037509	Rho guanine nucleotide exchange factor (GEF) 4 [Source:MGI Symbol;Acc:MGI:2442507]	+	gene	overlapping	0	4.89958	4.8636	4.75933	5.20851
TCONS_00000596	1	34843131	34847780	+	Fam168b	ENSMUSG00000037503	family with sequence similarity 168, member B [Source:MGI Symbol;Acc:MGI:2448487]	-	gene	downstream	66	-0.555659	-0.883703	-0.800964	-0.60586
TCONS_00000599	1	34849992	34879586	+	Plekhb2	ENSMUSG00000026123	pleckstrin homology domain containing, family B (evectins) member 2 [Source:MGI Symbol;Acc:MGI:2385825]	+	gene	overlapping	0	4.10232	4.27474	3.72283	4.02903
TCONS_00000606	1	34961441	34962503	+	null					Not found	0	-0.555659	-0.883703	-0.800964	-0.60586
TCONS_00000607	1	34970059	34970564	+	null					Not found	0	-0.555659	-0.883703	-0.800964	-0.60586
TCONS_00004605	1	35022722	35023088	-	null					Not found	0	-0.555659	-0.883703	-0.800964	-0.60586
TCONS_00000608	1	35023388	35024332	+	null					Not found	0	-0.555659	-0.883703	-0.800964	-0.60586
TCONS_00004607	1	35038171	35040298	-	null					Not found	0	-0.0703224	1.21006	-0.699629	-0.529859
TCONS_00000609	1	35039587	35040723	+	null					Not found	0	-0.555659	-0.883703	-0.800964	-0.60586
TCONS_00000610	1	35075759	35076341	+	null					Not found	0	-0.555659	-0.883703	-0.800964	-0.60586
TCONS_00000611	1	35097044	35099050	+	null					Not found	0	-0.555659	-0.883703	-0.800964	-0.60586
TCONS_00004608	1	35171908	35172671	-	null					Not found	0	-0.555659	-0.883703	-0.800964	-0.60586
TCONS_00004610	1	35175357	35179547	-	SNORA17	ENSMUSG00000077231	Small nucleolar RNA SNORA17 [Source:RFAM;Acc:RF00560]	-	gene	overlapping	0	-0.555659	-0.883703	-0.800964	-0.60586
TCONS_00004611	1	35181930	35182889	-	null					Not found	0	-0.555659	-0.883703	-0.800964	-0.60586
TCONS_00000613	1	35262712	35263432	+	null					Not found	0	-0.555659	-0.883703	-0.800964	-0.60586
TCONS_00004614	1	35296239	35307448	-	null					Not found	0	-0.171658	-0.833035	-0.750297	-0.60586
TCONS_00004617	1	35311254	35313444	-	null					Not found	0	-0.555659	-0.883703	-0.800964	-0.60586
TCONS_00000614	1	35314087	35315061	+	null					Not found	0	-0.555659	-0.883703	-0.800964	-0.60586
TCONS_00000617	1	35318292	35346715	+	null					Not found	0	0.268985	1.31139	-0.0329622	-0.0298587
TCONS_00000628	1	35351099	35352300	+	null					Not found	0	-0.555659	-0.883703	-0.800964	-0.60586
TCONS_00004619	1	35655390	35723966	-	null					Not found	0	-0.555659	-0.883703	-0.750297	0.546143
TCONS_00004621	1	35802074	35802916	-	null					Not found	0	-0.555659	-0.883703	-0.800964	-0.60586
TCONS_00004622	1	35812543	35827609	-	null					Not found	0	3.25829	3.26642	4.01013	3.17954
TCONS_00000632	1	35825481	35847191	+	null					Not found	0	-0.555659	-0.1157	-0.800964	-0.60586
TCONS_00004636	1	35843030	35896150	-	null					Not found	0	3.14309	1.32494	2.20512	1.33862
TCONS_00000635	1	35893530	35894265	+	null					Not found	0	-0.555659	-0.883703	-0.800964	-0.60586
TCONS_00000637	1	35900762	35903580	+	null					Not found	0	-0.555659	-0.883703	-0.800964	-0.60586
TCONS_00000638	1	35941613	35952733	+	null					Not found	0	-0.555659	-0.883703	-0.800964	-0.60586
TCONS_00000640	1	36051681	36051897	+	null					Not found	0	-0.555659	-0.883703	-0.800964	-0.60586
TCONS_00004655	1	36058621	36060412	-	null					Not found	0	-0.555659	-0.883703	-0.800964	-0.60586
TCONS_00000641	1	36068400	36106446	+	Hs6st1	ENSMUSG00000045216	heparan sulfate 6-O-sulfotransferase 1 [Source:MGI Symbol;Acc:MGI:1354958]	+	gene	overlapping	0	6.56998	6.62077	6.44136	6.42806
TCONS_00004656	1	36124178	36124552	-	null					Not found	0	-0.555659	-0.883703	-0.800964	-0.60586
TCONS_00004657	1	36140057	36244376	-	Uggt1	ENSMUSG00000037470	UDP-glucose glycoprotein glucosyltransferase 1 [Source:MGI Symbol;Acc:MGI:2443162]	-	gene	overlapping	0	7.39251	7.42	6.69045	6.93129
TCONS_00000643	1	36250109	36251153	+	null					Not found	0	-0.555659	-0.883703	-0.800964	-0.60586
TCONS_00000644	1	36259350	36262627	+	Neurl3	ENSMUSG00000047180	neuralized homolog 3 homolog (Drosophila) [Source:MGI Symbol;Acc:MGI:2429944]	-	gene	upstream	1975	-0.555659	-0.499701	-0.800964	-0.60586
TCONS_00004660	1	36304853	36307647	-	Arid5a	ENSMUSG00000037447	AT rich interactive domain 5A (MRF1-like) [Source:MGI Symbol;Acc:MGI:2443039]	+	gene	downstream	86	-0.555659	-0.883703	-0.800964	-0.60586
TCONS_00000645	1	36305644	36305825	+	Arid5a	ENSMUSG00000037447	AT rich interactive domain 5A (MRF1-like) [Source:MGI Symbol;Acc:MGI:2443039]	+	gene	downstream	1908	-0.555659	-0.883703	-0.800964	-0.60586
TCONS_00000646	1	36307733	36324348	+	Arid5a	ENSMUSG00000037447	AT rich interactive domain 5A (MRF1-like) [Source:MGI Symbol;Acc:MGI:2443039]	+	gene	overlapping	0	3.18876	2.73241	3.16014	2.99959
TCONS_00000651	1	36327895	36328321	+	null					Not found	0	-0.555659	-0.883703	-0.800964	-0.60586
TCONS_00004665	1	36335730	36380828	-	Kansl3	ENSMUSG00000010453	KAT8 regulatory NSL complex subunit 3 [Source:MGI Symbol;Acc:MGI:1918055]	-	gene	overlapping	0	5.64708	5.76143	5.57994	5.43477
TCONS_00004667	1	36381442	36381852	-	null					Not found	0	-0.504991	-0.883703	-0.800964	-0.60586
TCONS_00000652	1	36409376	36410150	+	null					Not found	0	-0.555659	-0.883703	-0.800964	-0.60586
TCONS_00004669	1	36411189	36414559	-	null					Not found	0	-0.504991	-0.499701	-0.800964	-0.529859
NOMERGE_TCONS_00000008	1	36416888	36422110	+	Lman2l	ENSMUSG00000001143	lectin, mannose-binding 2-like [Source:MGI Symbol;Acc:MGI:2443010]	-	gene	overlapping	0	-0.555659	-0.883703	-0.800964	-0.60586
TCONS_00004672	1	36418362	36445271	-	Lman2l	ENSMUSG00000001143	lectin, mannose-binding 2-like [Source:MGI Symbol;Acc:MGI:2443010]	-	gene	overlapping	0	4.91444	4.86973	5.02176	4.45223
TCONS_00000653	1	36465282	36469001	+	null					Not found	0	-0.555659	-0.883703	-0.800964	-0.60586
TCONS_00000656	1	36471620	36508776	+	Cnnm4	ENSMUSG00000037408	cyclin M4 [Source:MGI Symbol;Acc:MGI:2151060]	+	gene	overlapping	0	4.02941	4.31088	3.81729	3.90327
TCONS_00000657	1	36511835	36528237	+	Cnnm3	ENSMUSG00000001138	cyclin M3 [Source:MGI Symbol;Acc:MGI:2151055]	+	gene	overlapping	0	0.0739973	1.90393	0.212693	1.63111
TCONS_00004677	1	36530237	36547243	-	Ankrd23	ENSMUSG00000067653	ankyrin repeat domain 23 [Source:MGI Symbol;Acc:MGI:1925571]	-	gene	overlapping	0	-0.504991	-0.782367	-0.800964	-0.60586
TCONS_00004686	1	36548642	36683183	-	Sema4c	ENSMUSG00000026121	sema domain, immunoglobulin domain (Ig), transmembrane domain (TM) and short cytoplasmic domain, (semaphorin) 4C [Source:MGI Symbol;Acc:MGI:109252]	-	gene	overlapping	0	4.19973	3.70536	3.31243	2.88236
TCONS_00000658	1	36586189	36602146	+	Fam178b	ENSMUSG00000046337	family with sequence similarity 178, member B [Source:MGI Symbol;Acc:MGI:3026913]	-	gene	overlapping	0	-0.555659	-0.883703	-0.800964	-0.60586
CUFF.651.1	1	36647660	36649891	+	Fam178b	ENSMUSG00000046337	family with sequence similarity 178, member B [Source:MGI Symbol;Acc:MGI:3026913]	-	gene	overlapping	0	-0.504991	0.129955	0.162025	-0.529859
CUFF.656.1	1	36670045	36670583	+	Fam178b	ENSMUSG00000046337	family with sequence similarity 178, member B [Source:MGI Symbol;Acc:MGI:3026913]	-	gene	overlapping	0	-0.555659	-0.883703	-0.800964	-0.60586
TCONS_00000660	1	36691413	36693385	+	Cox5b	ENSMUSG00000061518	cytochrome c oxidase, subunit Vb [Source:MGI Symbol;Acc:MGI:88475]	+	gene	overlapping	0	6.11419	5.90325	6.02259	6.44578
TCONS_00004691	1	36698113	36710020	-	Actr1b	ENSMUSG00000037351	ARP1 actin-related protein 1 homolog B, centractin beta (yeast) [Source:MGI Symbol;Acc:MGI:1917446]	-	gene	overlapping	0	2.91344	2.83972	2.78411	4.0601
TCONS_00000662	1	36704244	36746569	+	Actr1b	ENSMUSG00000037351	ARP1 actin-related protein 1 homolog B, centractin beta (yeast) [Source:MGI Symbol;Acc:MGI:1917446]	-	gene	overlapping	0	2.24189	0.853263	2.09398	0.0461428
TCONS_00000665	1	36755218	36756984	+	null					Not found	0	-0.555659	-0.883703	-0.800964	-0.60586
TCONS_00000667	1	36757805	36782820	+	Zap70	ENSMUSG00000026117	zeta-chain (TCR) associated protein kinase [Source:MGI Symbol;Acc:MGI:99613]	+	gene	overlapping	0	3.00595	1.85326	1.39413	1.77586
TCONS_00004695	1	36792191	36939860	-	Tmem131	ENSMUSG00000026116	transmembrane protein 131 [Source:MGI Symbol;Acc:MGI:1927110]	-	gene	overlapping	0	6.55425	6.80392	6.41417	6.56126
TCONS_00004699	1	37178901	37196349	-	Vwa3b	ENSMUSG00000026115	von Willebrand factor A domain containing 3B [Source:MGI Symbol;Acc:MGI:1918103]	+	gene	overlapping	0	-0.555659	-0.883703	-0.800964	-0.60586
TCONS_00000675	1	37197055	37209036	+	null					Not found	0	-0.555659	-0.254046	-0.750297	-0.60586
TCONS_00000679	1	37218336	37263384	+	Cnga3	ENSMUSG00000026114	cyclic nucleotide gated channel alpha 3 [Source:MGI Symbol;Acc:MGI:1341818]	+	gene	overlapping	0	-0.555659	-0.883703	-0.800964	-0.60586
TCONS_00004702	1	37282351	37285425	-	null					Not found	0	-0.555659	-0.883703	-0.800964	-0.60586
TCONS_00000681	1	37292712	37293397	+	null					Not found	0	-0.555659	-0.883703	-0.800964	-0.60586
TCONS_00000682	1	37299721	37410736	+	Inpp4a	ENSMUSG00000026113	inositol polyphosphate-4-phosphatase, type I [Source:MGI Symbol;Acc:MGI:1931123]	+	gene	overlapping	0	2.88647	3.30491	3.01299	2.63111
TCONS_00004703	1	37305955	37306421	-	Inpp4a	ENSMUSG00000026113	inositol polyphosphate-4-phosphatase, type I [Source:MGI Symbol;Acc:MGI:1931123]	+	gene	overlapping	0	-0.555659	-0.883703	-0.800964	-0.60586
TCONS_00004704	1	37417084	37430103	-	6330578E17Rik	ENSMUSG00000026112	RIKEN cDNA 6330578E17 gene [Source:MGI Symbol;Acc:MGI:1923428]	-	gene	overlapping	0	3.78376	3.67307	3.6768	3.58987
TCONS_00000694	1	37430094	37439124	+	6330578E17Rik	ENSMUSG00000026112	RIKEN cDNA 6330578E17 gene [Source:MGI Symbol;Acc:MGI:1923428]	-	gene	overlapping	0	7.83786	7.51222	7.25637	7.64762
TCONS_00004708	1	37439340	37541088	-	Mgat4a	ENSMUSG00000026110	mannoside acetylglucosaminyltransferase 4, isoenzyme A [Source:MGI Symbol;Acc:MGI:2662992]	-	gene	overlapping	0	5.76985	6.2178	5.65659	5.88643
TCONS_00000698	1	37541222	37545799	+	Mgat4a	ENSMUSG00000026110	mannoside acetylglucosaminyltransferase 4, isoenzyme A [Source:MGI Symbol;Acc:MGI:2662992]	-	gene	downstream	206	-0.555659	-0.883703	-0.800964	-0.60586
TCONS_00004711	1	37541334	37541963	-	Mgat4a	ENSMUSG00000026110	mannoside acetylglucosaminyltransferase 4, isoenzyme A [Source:MGI Symbol;Acc:MGI:2662992]	-	gene	downstream	318	-0.555659	-0.883703	-0.800964	-0.60586
TCONS_00004712	1	37552538	37598347	-	null					Not found	0	-0.504991	-0.833035	-0.750297	0.631105
TCONS_00000702	1	37606882	37608581	+	null					Not found	0	-0.555659	-0.883703	-0.800964	-0.60586
TCONS_00004719	1	37611677	37720085	-	2010300C02Rik	ENSMUSG00000026090	RIKEN cDNA 2010300C02 gene [Source:MGI Symbol;Acc:MGI:1919347]	-	gene	overlapping	0	0.929678	-0.1157	1.18166	1.33862
TCONS_00000703	1	37614214	37616147	+	2010300C02Rik	ENSMUSG00000026090	RIKEN cDNA 2010300C02 gene [Source:MGI Symbol;Acc:MGI:1919347]	-	gene	overlapping	0	-0.504991	-0.883703	-0.800964	-0.60586
TCONS_00004722	1	37754572	37865079	-	Tsga10	ENSMUSG00000060771	testis specific 10 [Source:MGI Symbol;Acc:MGI:2685063]	-	gene	overlapping	0	5.21661	5.02822	4.57753	5.10236
CUFF.672.1	1	37774078	37774292	+	Tsga10	ENSMUSG00000060771	testis specific 10 [Source:MGI Symbol;Acc:MGI:2685063]	-	gene	overlapping	0	-0.555659	-0.883703	-0.800964	-0.60586
TCONS_00000704	1	37871543	37877387	+	Lipt1	ENSMUSG00000037216	lipoyltransferase 1 [Source:MGI Symbol;Acc:MGI:3645211]	+	gene	overlapping	0	5.65399	5.40925	5.8011	5.95543
TCONS_00004729	1	37874801	37890428	-	Lipt1	ENSMUSG00000037216	lipoyltransferase 1 [Source:MGI Symbol;Acc:MGI:3645211]	+	gene	overlapping	0	4.27335	4.05694	4.36298	4.46889
TCONS_00000708	1	37890403	37898535	+	Mitd1	ENSMUSG00000026088	MIT, microtubule interacting and transport, domain containing 1 [Source:MGI Symbol;Acc:MGI:1916278]	-	gene	overlapping	0	4.05288	3.98689	3.59382	4.30103
TCONS_00000711	1	37933596	37955711	+	Gm15457	ENSMUSG00000087374	predicted gene 15457 [Source:MGI Symbol;Acc:MGI:3705190]	+	gene	overlapping	0	-0.555659	-0.883703	-0.416963	-0.60586
TCONS_00000714	1	37968260	37968658	+	null					Not found	0	-0.555659	-0.883703	-0.800964	-0.529859
TCONS_00004732	1	37974627	37980780	-	7SK	ENSMUSG00000089141	7SK RNA [Source:RFAM;Acc:RF00100]	+	gene	upstream	424	-0.504991	-0.449034	0.162025	1.20711
TCONS_00004737	1	37983867	37997355	-	Txndc9	ENSMUSG00000058407	thioredoxin domain containing 9 [Source:MGI Symbol;Acc:MGI:2138153]	-	gene	overlapping	0	7.30613	7.34985	7.41026	7.65773
TCONS_00000715	1	37997316	38055579	+	Txndc9	ENSMUSG00000058407	thioredoxin domain containing 9 [Source:MGI Symbol;Acc:MGI:2138153]	-	gene	overlapping	0	10.1477	10.3287	10.2445	10.2128
TCONS_00004740	1	38052787	38131390	-	Eif5b	ENSMUSG00000026083	eukaryotic translation initiation factor 5B [Source:MGI Symbol;Acc:MGI:2441772]	+	gene	overlapping	0	7.13851	7.22213	6.32806	6.6162
TCONS_00000720	1	38131401	38131655	+	Rev1	ENSMUSG00000026082	REV1 homolog (S. cerevisiae) [Source:MGI Symbol;Acc:MGI:1929074]	-	gene	downstream	1739	-0.555659	-0.883703	-0.800964	-0.60586
TCONS_00004744	1	38175755	38664955	-	Aff3	ENSMUSG00000037138	AF4/FMR2 family, member 3 [Source:MGI Symbol;Acc:MGI:106927]	-	gene	overlapping	0	3.53092	4.0701	3.78411	3.92359
TCONS_00000721	1	38235420	38247652	+	Aff3	ENSMUSG00000037138	AF4/FMR2 family, member 3 [Source:MGI Symbol;Acc:MGI:106927]	-	gene	overlapping	0	-0.555659	-0.449034	-0.800964	-0.529859
TCONS_00000725	1	38724380	38726608	+	null					Not found	0	-0.555659	-0.883703	-0.800964	-0.60586
TCONS_00004751	1	38793372	38836744	-	Lonrf2	ENSMUSG00000048814	LON peptidase N-terminal domain and ring finger 2 [Source:MGI Symbol;Acc:MGI:1920209]	-	gene	overlapping	0	2.53427	3.30273	2.58912	2.04614
TCONS_00000726	1	38833712	38835151	+	Lonrf2	ENSMUSG00000048814	LON peptidase N-terminal domain and ring finger 2 [Source:MGI Symbol;Acc:MGI:1920209]	-	gene	overlapping	0	-0.555659	-0.883703	-0.750297	0.546143
TCONS_00004753	1	38863877	38898160	-	Chst10	ENSMUSG00000026080	carbohydrate sulfotransferase 10 [Source:MGI Symbol;Acc:MGI:2138283]	-	gene	overlapping	0	0.407331	-0.1157	0.162025	1.20711
TCONS_00004754	1	38986812	38987655	-	Pdcl3	ENSMUSG00000026078	phosducin-like 3 [Source:MGI Symbol;Acc:MGI:1916083]	+	gene	downstream	159	-0.555659	-0.883703	-0.800964	-0.60586
TCONS_00000727	1	38987681	38997236	+	Pdcl3	ENSMUSG00000026078	phosducin-like 3 [Source:MGI Symbol;Acc:MGI:1916083]	+	gene	overlapping	0	5.74669	5.53004	6.36746	5.3405
TCONS_00000731	1	39008817	39010762	+	null					Not found	0	-0.555659	-0.883703	-0.800964	-0.60586
TCONS_00004755	1	39026007	39026531	-	null					Not found	0	-0.555659	-0.883703	-0.800964	-0.60586
TCONS_00000733	1	39194212	39363427	+	Npas2	ENSMUSG00000026077	neuronal PAS domain protein 2 [Source:MGI Symbol;Acc:MGI:109232]	+	gene	overlapping	0	5.24994	5.13609	5.65659	5.42129
TCONS_00004756	1	39312567	39341404	-	Npas2	ENSMUSG00000026077	neuronal PAS domain protein 2 [Source:MGI Symbol;Acc:MGI:109232]	+	gene	overlapping	0	-0.555659	-0.499701	-0.750297	-0.60586
TCONS_00000738	1	39367823	39371908	+	Rpl31	ENSMUSG00000073702	ribosomal protein L31 [Source:MGI Symbol;Acc:MGI:2149632]	+	gene	overlapping	0	3.56128	3.60257	4.8499	5.13079
TCONS_00004759	1	39371499	39478747	-	Rpl31	ENSMUSG00000073702	ribosomal protein L31 [Source:MGI Symbol;Acc:MGI:2149632]	+	gene	overlapping	0	8.27684	8.25446	8.24923	8.00869
TCONS_00000739	1	39478888	39480557	+	Tbc1d8	ENSMUSG00000003134	TBC1 domain family, member 8 [Source:MGI Symbol;Acc:MGI:1927225]	-	gene	downstream	141	-0.555659	-0.883703	-0.800964	-0.60586
TCONS_00004760	1	39488175	39488393	-	null					Not found	0	-0.504991	-0.833035	-0.800964	-0.60586
TCONS_00004761	1	39518454	39518896	-	U3	ENSMUSG00000065629	Small nucleolar RNA U3 [Source:RFAM;Acc:RF00012]	+	gene	downstream	637	-0.555659	-0.883703	-0.800964	-0.60586
TCONS_00000740	1	39519531	39546881	+	U3	ENSMUSG00000065629	Small nucleolar RNA U3 [Source:RFAM;Acc:RF00012]	+	gene	overlapping	0	7.93987	7.86364	7.37797	7.75077
CUFF.717.1	1	39527711	39532347	-	null					Not found	0	1.89864	2.20623	2.18166	0.0461428
TCONS_00004762	1	39547659	39548876	-	Gm15832	ENSMUSG00000085894	predicted gene 15832 [Source:MGI Symbol;Acc:MGI:3834078]	-	gene	overlapping	0	-0.555659	-0.883703	-0.800964	-0.60586
TCONS_00004763	1	39551296	39577431	-	Gm15832	ENSMUSG00000085894	predicted gene 15832 [Source:MGI Symbol;Acc:MGI:3834078]	-	gene	overlapping	0	2.84012	3.71958	2.11284	2.56834
TCONS_00000746	1	39610465	39610937	+	null					Not found	0	-0.555659	-0.883703	-0.800964	-0.60586
TCONS_00004765	1	39618406	39651182	-	Creg2	ENSMUSG00000050967	cellular repressor of E1A-stimulated genes 2 [Source:MGI Symbol;Acc:MGI:1928333]	-	gene	overlapping	0	0.929678	1.85326	0.351039	0.262623
TCONS_00000747	1	39650176	39667017	+	Creg2	ENSMUSG00000050967	cellular repressor of E1A-stimulated genes 2 [Source:MGI Symbol;Acc:MGI:1928333]	-	gene	overlapping	0	3.48063	3.48172	2.18166	2.88236
TCONS_00004766	1	39665306	39720997	-	Rfx8	ENSMUSG00000057173	regulatory factor X 8 [Source:MGI Symbol;Acc:MGI:3588206]	-	gene	overlapping	0	-0.555659	-0.883703	-0.800964	-0.60586
CUFF.708.1	1	39694277	39694452	+	Rfx8	ENSMUSG00000057173	regulatory factor X 8 [Source:MGI Symbol;Acc:MGI:3588206]	-	gene	overlapping	0	-0.555659	-0.883703	-0.800964	-0.60586
TCONS_00000750	1	39768320	39770976	+	null					Not found	0	-0.555659	-0.883703	-0.800964	-0.60586
TCONS_00004767	1	39770362	39771174	-	null					Not found	0	-0.555659	-0.883703	-0.800964	-0.60586
TCONS_00000752	1	39785057	39785590	+	null					Not found	0	-0.555659	-0.883703	-0.800964	-0.60586
TCONS_00004768	1	39816486	39820473	-	null					Not found	0	-0.555659	-0.449034	-0.800964	0.838624
TCONS_00004769	1	39896994	39897436	-	null					Not found	0	-0.555659	-0.883703	-0.800964	-0.60586
TCONS_00000754	1	39900244	40026312	+	Map4k4	ENSMUSG00000026074	mitogen-activated protein kinase kinase kinase kinase 4 [Source:MGI Symbol;Acc:MGI:1349394]	+	gene	overlapping	0	7.86749	7.86112	7.87691	7.88368
TCONS_00004772	1	40040209	40047178	-	null					Not found	0	-0.555659	2.20409	0.495359	-0.0298587
TCONS_00004778	1	40069903	40085853	-	Il1r2	ENSMUSG00000026073	interleukin 1 receptor, type II [Source:MGI Symbol;Acc:MGI:96546]	+	gene	overlapping	0	0.161676	0.658276	-0.800964	-0.529859
TCONS_00000768	1	40073868	40125233	+	Il1r2	ENSMUSG00000026073	interleukin 1 receptor, type II [Source:MGI Symbol;Acc:MGI:96546]	+	gene	overlapping	0	3.35583	3.63694	3.06529	3.63111
TCONS_00004780	1	40212110	40213036	-	null					Not found	0	-0.555659	-0.883703	-0.800964	-0.60586
TCONS_00000773	1	40213203	40224013	+	Il1r1	ENSMUSG00000026072	interleukin 1 receptor, type I [Source:MGI Symbol;Acc:MGI:96545]	+	gene	downstream	1067	-0.555659	-0.883703	-0.800964	-0.529859
TCONS_00000780	1	40225080	40316200	+	Il1r1	ENSMUSG00000026072	interleukin 1 receptor, type I [Source:MGI Symbol;Acc:MGI:96545]	+	gene	overlapping	0	6.39573	6.78718	6.27203	6.82242
TCONS_00000791	1	40465939	40500854	+	Il18r1	ENSMUSG00000026070	interleukin 18 receptor 1 [Source:MGI Symbol;Acc:MGI:105383]	+	gene	overlapping	0	2.25544	0.41262	1.14848	-0.0298587
TCONS_00000792	1	40515362	40551705	+	Il18rap	ENSMUSG00000026068	interleukin 18 receptor accessory protein [Source:MGI Symbol;Acc:MGI:1338888]	+	gene	overlapping	0	2.50109	2.60909	-0.0329623	2.36807
TCONS_00004783	1	40578719	40579362	-	Slc9a4	ENSMUSG00000026065	solute carrier family 9 (sodium/hydrogen exchanger), member 4 [Source:MGI Symbol;Acc:MGI:105074]	+	gene	downstream	865	-0.555659	-0.883703	-0.800964	-0.60586
TCONS_00000796	1	40580059	40631021	+	Slc9a4	ENSMUSG00000026065	solute carrier family 9 (sodium/hydrogen exchanger), member 4 [Source:MGI Symbol;Acc:MGI:105074]	+	gene	overlapping	0	4.20094	4.5946	3.79121	4.74712
TCONS_00004785	1	40680647	40698005	-	Slc9a2	ENSMUSG00000026062	solute carrier family 9 (sodium/hydrogen exchanger), member 2 [Source:MGI Symbol;Acc:MGI:105075]	+	gene	overlapping	0	0.847973	0.129955	1.38019	-0.529859
TCONS_00000799	1	40681712	40769237	+	Slc9a2	ENSMUSG00000026062	solute carrier family 9 (sodium/hydrogen exchanger), member 2 [Source:MGI Symbol;Acc:MGI:105075]	+	gene	overlapping	0	-0.555659	-0.833035	-0.750297	-0.60586
TCONS_00004792	1	40772038	40790722	-	Mfsd9	ENSMUSG00000041945	major facilitator superfamily domain containing 9 [Source:MGI Symbol;Acc:MGI:2443548]	-	gene	overlapping	0	5.07783	4.96029	5.32577	4.80694
TCONS_00000805	1	40805601	40856855	+	Tmem182	ENSMUSG00000079588	transmembrane protein 182 [Source:MGI Symbol;Acc:MGI:1923725]	+	gene	overlapping	0	4.51038	4.2022	4.01013	4.2423
TCONS_00000807	1	40859591	40870373	+	AC101702.1	ENSMUSG00000094136	No description	-	gene	overlapping	0	-0.555659	-0.499701	-0.800964	-0.60586
TCONS_00004793	1	40860807	40870237	-	AC101702.1	ENSMUSG00000094136	No description	-	gene	overlapping	0	-0.504991	-0.449034	-0.416963	-0.60586
TCONS_00000811	1	40883995	40983617	+	null					Not found	0	2.74949	3.11727	2.25579	0.546143
TCONS_00004799	1	40994686	41014387	-	null					Not found	0	0.703654	3.29391	0.828692	3.80004
TCONS_00000812	1	41018670	41018946	+	null					Not found	0	-0.555659	-0.883703	-0.800964	-0.60586
TCONS_00000815	1	41275428	41276065	+	null					Not found	0	-0.555659	-0.883703	-0.800964	-0.529859
TCONS_00004803	1	41276168	41277735	-	null					Not found	0	-0.555659	-0.833035	-0.800964	-0.0298587
TCONS_00004804	1	41352598	41361441	-	null					Not found	0	1.37032	1.1866	2.67297	2.33862
TCONS_00000816	1	41360153	41377027	+	null					Not found	0	-0.555659	-0.883703	-0.366296	-0.60586
TCONS_00000818	1	41380885	41431871	+	null					Not found	0	-0.454323	0.268301	0.458348	-0.60586
TCONS_00004808	1	41381296	41381927	-	null					Not found	0	-0.555659	-0.883703	-0.800964	-0.60586
TCONS_00000822	1	41450110	41461781	+	null					Not found	0	-0.555659	-0.883703	-0.699629	-0.529859
TCONS_00004809	1	41563456	41563891	-	null					Not found	0	-0.555659	-0.883703	-0.800964	-0.60586
TCONS_00004810	1	42117241	42121905	-	null					Not found	0	-0.555659	-0.833035	-0.800964	-0.60586
TCONS_00004811	1	42144024	42166530	-	null					Not found	0	0.457998	-0.398366	0.0236795	0.546143
TCONS_00004815	1	42179872	42182776	-	null					Not found	0	-0.12099	-0.833035	-0.800964	-0.529859
TCONS_00004819	1	42301555	42304020	-	null					Not found	0	-0.555659	-0.254046	-0.416963	0.262622
TCONS_00004822	1	42545032	42549916	-	null					Not found	0	7.87696	7.79552	8.32783	8.34218
TCONS_00004823	1	42628970	42630341	-	null					Not found	0	-0.555659	-0.883703	-0.800964	-0.60586
TCONS_00004825	1	42648203	42667672	-	2610017I09Rik	ENSMUSG00000060424	RIKEN cDNA 2610017I09 gene [Source:MGI Symbol;Acc:MGI:1913547]	-	gene	overlapping	0	-0.555659	-0.883703	-0.800964	-0.60586
TCONS_00000823	1	42695686	42702355	+	Gm20646	ENSMUSG00000093436	predicted gene 20646 [Source:MGI Symbol;Acc:MGI:5313093]	+	gene	overlapping	0	-0.504991	-0.883703	-0.416963	-0.529859
TCONS_00004826	1	42722322	42722685	-	Gm20646	ENSMUSG00000093436	predicted gene 20646 [Source:MGI Symbol;Acc:MGI:5313093]	+	gene	overlapping	0	-0.555659	-0.883703	-0.800964	-0.60586
TCONS_00004827	1	42726190	42728664	-	Gm20646	ENSMUSG00000093436	predicted gene 20646 [Source:MGI Symbol;Acc:MGI:5313093]	+	gene	overlapping	0	-0.504991	-0.499701	-0.800964	0.0461428
TCONS_00000830	1	42727220	42752910	+	Gm20646	ENSMUSG00000093436	predicted gene 20646 [Source:MGI Symbol;Acc:MGI:5313093]	+	gene	overlapping	0	2.4728	2.4187	2.40768	2.04614
TCONS_00004829	1	42769974	42772328	-	null					Not found	0	-0.555659	-0.883703	-0.800964	-0.60586
TCONS_00000837	1	42770147	42770792	+	null					Not found	0	-0.555659	-0.883703	-0.800964	-0.60586
TCONS_00000838	1	42772454	42774844	+	null					Not found	0	0.545677	1.09892	0.898991	0.546143
TCONS_00000842	1	42850871	42905682	+	Mrps9	ENSMUSG00000060679	mitochondrial ribosomal protein S9 [Source:MGI Symbol;Acc:MGI:1916777]	+	gene	overlapping	0	5.14241	4.86651	5.23112	5.23637
TCONS_00000844	1	42952872	43035449	+	Gpr45	ENSMUSG00000041907	G protein-coupled receptor 45 [Source:MGI Symbol;Acc:MGI:2135882]	+	gene	overlapping	0	-0.555659	-0.883703	-0.800964	-0.60586
TCONS_00004838	1	43047221	43099202	-	Tgfbrap1	ENSMUSG00000070939	transforming growth factor, beta receptor associated protein 1 [Source:MGI Symbol;Acc:MGI:2447427]	-	gene	overlapping	0	6.81167	6.7456	6.69007	7.11819
TCONS_00000846	1	43098541	43115947	+	Tgfbrap1	ENSMUSG00000070939	transforming growth factor, beta receptor associated protein 1 [Source:MGI Symbol;Acc:MGI:2447427]	-	gene	overlapping	0	3.81605	3.62389	3.98967	3.78603
TCONS_00000847	1	43121442	43121740	+	Fhl2	ENSMUSG00000008136	four and a half LIM domains 2 [Source:MGI Symbol;Acc:MGI:1338762]	-	gene	upstream	1334	-0.555659	-0.883703	-0.800964	-0.60586
TCONS_00004839	1	43123071	43163961	-	Fhl2	ENSMUSG00000008136	four and a half LIM domains 2 [Source:MGI Symbol;Acc:MGI:1338762]	-	gene	overlapping	0	-0.555659	-0.883703	-0.800964	-0.60586
TCONS_00000849	1	43212514	43216042	+	null					Not found	0	-0.555659	-0.782367	-0.416963	0.546143
TCONS_00000850	1	43325423	43333629	+	null					Not found	0	-0.171658	-0.304714	-0.750297	0.262623
TCONS_00004840	1	43407482	43407639	-	null					Not found	0	-0.555659	-0.883703	-0.800964	-0.60586
TCONS_00000854	1	43445751	43570519	+	Nck2	ENSMUSG00000066877	non-catalytic region of tyrosine kinase adaptor protein 2 [Source:MGI Symbol;Acc:MGI:1306821]	+	gene	overlapping	0	0.865463	1.93497	1.56566	1.04614
TCONS_00004842	1	43557790	43605332	-	Nck2	ENSMUSG00000066877	non-catalytic region of tyrosine kinase adaptor protein 2 [Source:MGI Symbol;Acc:MGI:1306821]	+	gene	overlapping	0	4.22268	3.6809	3.87155	4.33862
TCONS_00004849	1	43749512	43827867	-	Uxs1	ENSMUSG00000057363	UDP-glucuronate decarboxylase 1 [Source:MGI Symbol;Acc:MGI:1915133]	-	gene	overlapping	0	6.75941	6.774	7.16995	7.10766
TCONS_00004850	1	43880383	43888045	-	null					Not found	0	0.652986	0.324942	1.92245	1.70711
TCONS_00004851	1	43932222	43933903	-	Tpp2	ENSMUSG00000041763	tripeptidyl peptidase II [Source:MGI Symbol;Acc:MGI:102724]	+	gene	downstream	99	-0.555659	-0.883703	-0.800964	-0.60586
TCONS_00000860	1	43933675	44003141	+	Tpp2	ENSMUSG00000041763	tripeptidyl peptidase II [Source:MGI Symbol;Acc:MGI:102724]	+	gene	overlapping	0	5.61438	5.76355	5.21258	5.6741
TCONS_00004857	1	44086613	44102555	-	1700029F09Rik	ENSMUSG00000026049	RIKEN cDNA 1700029F09 gene [Source:MGI Symbol;Acc:MGI:1922873]	-	gene	overlapping	0	5.67714	6.01354	5.80738	6.35142
TCONS_00004858	1	44106546	44118960	-	Kdelc1	ENSMUSG00000026047	KDEL (Lys-Asp-Glu-Leu) containing 1 [Source:MGI Symbol;Acc:MGI:1919300]	-	gene	overlapping	0	3.04296	2.14959	2.7733	2.36807
TCONS_00000864	1	44118957	44146022	+	Bivm	ENSMUSG00000041684	basic, immunoglobulin-like variable motif containing [Source:MGI Symbol;Acc:MGI:2179809]	+	gene	overlapping	0	3.46776	3.13864	3.52882	3.30004
TCONS_00000869	1	44147772	44181260	+	Ercc5	ENSMUSG00000026048	excision repair cross-complementing rodent repair deficiency, complementation group 5 [Source:MGI Symbol;Acc:MGI:103582]	+	gene	overlapping	0	5.93454	5.85119	5.88303	5.74485
TCONS_00004859	1	44204070	44218961	-	4832428D23Rik	ENSMUSG00000046828	RIKEN cDNA 4832428D23 gene [Source:MGI Symbol;Acc:MGI:2685837]	-	gene	overlapping	0	-0.555659	-0.883703	-0.800964	-0.60586
TCONS_00000872	1	44212162	44213118	+	4832428D23Rik	ENSMUSG00000046828	RIKEN cDNA 4832428D23 gene [Source:MGI Symbol;Acc:MGI:2685837]	-	gene	overlapping	0	0.263011	-0.1157	0.741014	-0.0298587
TCONS_00004861	1	44546609	44546672	-	null					Not found	0	-0.555659	-0.883703	-0.800964	-0.60586
TCONS_00000877	1	44551511	44796833	+	Gulp1	ENSMUSG00000056870	GULP, engulfment adaptor PTB domain containing 1 [Source:MGI Symbol;Acc:MGI:1920407]	+	gene	overlapping	0	-0.504991	0.41262	-0.221976	0.838624
TCONS_00004863	1	44739396	44744221	-	Gulp1	ENSMUSG00000056870	GULP, engulfment adaptor PTB domain containing 1 [Source:MGI Symbol;Acc:MGI:1920407]	+	gene	overlapping	0	-0.555659	-0.883703	-0.800964	-0.60586
TCONS_00004864	1	44859415	44860201	-	null					Not found	0	-0.555659	-0.883703	-0.800964	-0.529859
TCONS_00000885	1	45001191	45001645	+	null					Not found	0	-0.555659	-0.883703	-0.800964	-0.60586
TCONS_00000886	1	45025504	45028223	+	null					Not found	0	-0.555659	-0.883703	-0.800964	-0.60586
TCONS_00004870	1	45045980	45057418	-	null					Not found	0	4.37332	4.26287	3.57695	4.27381
TCONS_00000887	1	45057369	45059666	+	null					Not found	0	-0.555659	-0.883703	-0.800964	-0.60586
TCONS_00000888	1	45067096	45076490	+	null					Not found	0	-0.555659	-0.883703	-0.800964	-0.60586
TCONS_00000891	1	45311538	45349706	+	Col3a1	ENSMUSG00000026043	collagen, type III, alpha 1 [Source:MGI Symbol;Acc:MGI:88453]	+	gene	overlapping	0	-0.555659	-0.883703	-0.800964	-0.60586
TCONS_00004871	1	45374321	45503282	-	Col5a2	ENSMUSG00000026042	collagen, type V, alpha 2 [Source:MGI Symbol;Acc:MGI:88458]	-	gene	overlapping	0	-0.555659	-0.883703	-0.800964	-0.60586
TCONS_00000894	1	45664785	45666776	+	null					Not found	0	-0.555659	-0.883703	-0.800964	-0.60586
TCONS_00004874	1	45742013	45752144	-	SNORA55	ENSMUSG00000065255	Small nucleolar RNA SNORA55 [Source:RFAM;Acc:RF00431]	+	gene	overlapping	0	-0.555659	-0.833035	-0.800964	-0.529859
TCONS_00000896	1	45746895	45747301	+	SNORA55	ENSMUSG00000065255	Small nucleolar RNA SNORA55 [Source:RFAM;Acc:RF00431]	+	gene	overlapping	0	-0.555659	-0.883703	-0.800964	-0.60586
TCONS_00004875	1	45754982	45755708	-	null					Not found	0	-0.555659	-0.883703	-0.800964	-0.60586
TCONS_00004877	1	45758329	45760313	-	null					Not found	0	-0.555659	-0.883703	-0.800964	-0.60586
TCONS_00004879	1	45776571	45780376	-	null					Not found	0	-0.555659	-0.883703	-0.800964	-0.60586
TCONS_00000897	1	45795129	45823632	+	Wdr75	ENSMUSG00000025995	WD repeat domain 75 [Source:MGI Symbol;Acc:MGI:1920924]	+	gene	overlapping	0	6.84019	6.86333	6.40216	6.72519
TCONS_00004880	1	45857254	45857802	-	null					Not found	0	-0.555659	-0.883703	-0.800964	-0.60586
TCONS_00004882	1	45908070	45925594	-	Slc40a1	ENSMUSG00000025993	solute carrier family 40 (iron-regulated transporter), member 1 [Source:MGI Symbol;Acc:MGI:1315204]	-	gene	overlapping	0	-0.555659	-0.883703	-0.800964	-0.529859
TCONS_00004883	1	46011547	46012266	-	Gm3852	ENSMUSG00000090682	predicted gene 3852 [Source:MGI Symbol;Acc:MGI:3782024]	-	gene	overlapping	0	-0.555659	-0.883703	-0.800964	-0.60586
TCONS_00000902	1	46066738	46373612	+	Dnahc7b	ENSMUSG00000041144	dynein, axonemal, heavy chain 7B [Source:MGI Symbol;Acc:MGI:2684953]	+	gene	overlapping	0	3.44531	4.48772	3.84644	4.65452
TCONS_00004884	1	46357090	46359566	-	Dnahc7b	ENSMUSG00000041144	dynein, axonemal, heavy chain 7B [Source:MGI Symbol;Acc:MGI:2684953]	+	gene	overlapping	0	-0.555659	-0.883703	-0.800964	-0.60586
TCONS_00000912	1	46425383	46494628	+	null					Not found	0	0.457998	0.217633	0.495359	-0.0298587
TCONS_00000915	1	46494725	46519227	+	null					Not found	0	-0.555659	-0.883703	-0.800964	-0.529859
TCONS_00000919	1	46520514	46527544	+	null					Not found	0	-0.555659	-0.883703	-0.750297	-0.60586
TCONS_00000920	1	46527613	46533221	+	null					Not found	0	-0.555659	-0.883703	-0.800964	-0.60586
TCONS_00000922	1	46543189	46545890	+	null					Not found	0	-0.555659	-0.883703	-0.800964	-0.60586
TCONS_00000924	1	46608961	46626111	+	Dnahc7c	ENSMUSG00000095861	dynein, axonemal, heavy chain 7C [Source:MGI Symbol;Acc:MGI:3639762]	+	gene	overlapping	0	-0.555659	-0.883703	-0.800964	-0.60586
TCONS_00000925	1	46639158	46639763	+	null					Not found	0	0.0739974	-0.00839098	0.212693	0.262623
TCONS_00000929	1	46639923	46682444	+	null					Not found	0	5.92349	6.22316	5.96733	6.23067
TCONS_00004886	1	46654039	46654179	-	null					Not found	0	-0.555659	-0.883703	-0.800964	-0.60586
TCONS_00000938	1	46685500	46725221	+	null					Not found	0	-0.555659	0.463288	-0.0836299	0.338624
TCONS_00000946	1	46730775	46766705	+	null					Not found	0	0.545677	1.65828	1.51499	1.33862
TCONS_00000954	1	46769074	46774086	+	null					Not found	0	-0.504991	-0.883703	-0.699629	0.546143
TCONS_00000955	1	46775233	46791920	+	null					Not found	0	-0.555659	-0.782367	-0.416963	-0.529859
TCONS_00004887	1	46789214	46792428	-	null					Not found	0	-0.555659	-0.883703	-0.800964	-0.60586
TCONS_00004888	1	46795719	46795801	-	null					Not found	0	-0.555659	-0.883703	-0.800964	-0.60586
TCONS_00000957	1	46798228	46799540	+	null					Not found	0	-0.555659	-0.883703	-0.800964	-0.60586
TCONS_00004890	1	46807544	46905258	-	Slc39a10	ENSMUSG00000025986	solute carrier family 39 (zinc transporter), member 10 [Source:MGI Symbol;Acc:MGI:1914515]	-	gene	overlapping	0	7.81468	7.8532	8.3911	7.90256
TCONS_00000958	1	46904901	46905596	+	null					Not found	0	-0.555659	-0.883703	-0.800964	-0.60586
TCONS_00004894	1	47062960	47066932	-	null					Not found	0	-0.555659	-0.883703	-0.800964	-0.60586
TCONS_00004895	1	47069930	47071050	-	null					Not found	0	-0.555659	-0.883703	-0.800964	-0.60586
TCONS_00004900	1	47228298	47229755	-	null					Not found	0	-0.555659	-0.883703	-0.800964	-0.60586
TCONS_00004902	1	47257975	47259731	-	null					Not found	0	-0.504991	-0.398366	-0.750297	0.546143
TCONS_00004903	1	47266343	47267466	-	null					Not found	0	-0.555659	-0.833035	-0.800964	0.338624
TCONS_00004905	1	47438494	47440162	-	null					Not found	0	-0.555659	-0.883703	-0.800964	-0.60586
TCONS_00004907	1	47559487	47566609	-	null					Not found	0	-0.504991	-0.833035	-0.750297	1.83862
TCONS_00004910	1	47955728	47958309	-	null					Not found	0	-0.555659	-0.883703	-0.800964	-0.60586
TCONS_00000965	1	49114316	49115446	+	null					Not found	0	-0.555659	-0.883703	-0.800964	-0.60586
TCONS_00000966	1	49244616	49338246	+	C230029F24Rik	ENSMUSG00000051616	RIKEN cDNA C230029F24 gene [Source:MGI Symbol;Acc:MGI:3045370]	+	gene	overlapping	0	-0.555659	-0.883703	-0.800964	-0.60586
TCONS_00004917	1	49292612	49299058	-	C230029F24Rik	ENSMUSG00000051616	RIKEN cDNA C230029F24 gene [Source:MGI Symbol;Acc:MGI:3045370]	+	gene	overlapping	0	-0.12099	1.46329	1.02368	4.34888
TCONS_00004919	1	49419275	49419457	-	null					Not found	0	-0.555659	-0.883703	-0.800964	-0.60586
TCONS_00000967	1	49520021	49528570	+	null					Not found	0	-0.555659	-0.883703	-0.800964	-0.60586
TCONS_00000973	1	50900647	51187270	+	Tmeff2	ENSMUSG00000026109	transmembrane protein with EGF-like and two follistatin-like domains 2 [Source:MGI Symbol;Acc:MGI:1861735]	+	gene	overlapping	0	1.79133	1.5706	0.357013	2.99959
TCONS_00004922	1	51132198	51169276	-	Tmeff2	ENSMUSG00000026109	transmembrane protein with EGF-like and two follistatin-like domains 2 [Source:MGI Symbol;Acc:MGI:1861735]	+	gene	overlapping	0	-0.454323	1.12995	-0.800964	0.546143
TCONS_00000980	1	51289126	51302959	+	Sdpr	ENSMUSG00000045954	serum deprivation response [Source:MGI Symbol;Acc:MGI:99513]	+	gene	overlapping	0	-0.555659	-0.883703	-0.800964	-0.60586
TCONS_00000981	1	51396542	51399810	+	null					Not found	0	-0.555659	-0.883703	-0.800964	-0.529859
TCONS_00004928	1	51465004	51478453	-	Obfc2a	ENSMUSG00000026107	oligonucleotide/oligosaccharide-binding fold containing 2A [Source:MGI Symbol;Acc:MGI:1923258]	-	gene	overlapping	0	3.76429	4.36155	2.7733	4.08987
TCONS_00004932	1	51483965	51513335	-	null					Not found	0	2.00595	1.59406	1.79766	1.83862
TCONS_00000982	1	51521229	51521424	+	null					Not found	0	-0.171658	-0.883703	-0.800964	-0.60586
TCONS_00004934	1	51566400	51566749	-	null					Not found	0	-0.555659	-0.883703	-0.800964	-0.60586
TCONS_00004936	1	51581412	51632669	-	null					Not found	0	2.70963	2.71492	0.87936	3.06834
TCONS_00000983	1	51669691	51669937	+	null					Not found	0	-0.555659	-0.883703	-0.800964	-0.60586
TCONS_00000984	1	51729834	51736453	+	null					Not found	0	-0.555659	-0.833035	-0.750297	-0.0298587
TCONS_00004949	1	51749764	51927729	-	Myo1b	ENSMUSG00000018417	myosin IB [Source:MGI Symbol;Acc:MGI:107752]	-	gene	overlapping	0	7.46615	7.1419	6.87214	6.55167
TCONS_00004963	1	51940519	51973148	-	Gm8420	ENSMUSG00000072324	predicted gene 8420 [Source:MGI Symbol;Acc:MGI:3645594]	-	gene	overlapping	0	-0.12099	0.658276	0.458348	1.7423
TCONS_00000985	1	51973223	51974140	+	null					Not found	0	0.161676	0.0422767	-0.366296	-0.453857
TCONS_00000986	1	51976476	51977253	+	null					Not found	0	-0.555659	-0.883703	-0.800964	-0.60586
TCONS_00000987	1	51979287	51980289	+	null					Not found	0	-0.555659	-0.883703	-0.800964	-0.60586
TCONS_00000988	1	51983992	52109757	+	Stat4	ENSMUSG00000062939	signal transducer and activator of transcription 4 [Source:MGI Symbol;Acc:MGI:103062]	+	gene	overlapping	0	5.71206	5.83623	5.57073	5.84992
TCONS_00004975	1	52108520	52113837	-	Stat4	ENSMUSG00000062939	signal transducer and activator of transcription 4 [Source:MGI Symbol;Acc:MGI:103062]	+	gene	upstream	1332	-0.555659	-0.883703	-0.800964	-0.60586
TCONS_00000997	1	52119438	52161865	+	Stat1	ENSMUSG00000026104	signal transducer and activator of transcription 1 [Source:MGI Symbol;Acc:MGI:103063]	+	gene	overlapping	0	1.7603	1.79662	2.40684	2.63111
TCONS_00004977	1	52163448	52233257	-	Gls	ENSMUSG00000026103	glutaminase [Source:MGI Symbol;Acc:MGI:95752]	-	gene	overlapping	0	1.97277	2.09892	1.58912	2.49959
TCONS_00001005	1	52373339	52375941	+	null					Not found	0	-0.555659	-0.883703	-0.800964	-0.60586
TCONS_00001008	1	52408732	52409721	+	null					Not found	0	-0.555659	-0.883703	-0.800964	-0.60586
TCONS_00004981	1	52444436	52444544	-	U6	ENSMUSG00000065192	U6 spliceosomal RNA [Source:RFAM;Acc:RF00026]	-	gene	overlapping	0	-0.555659	-0.883703	-0.800964	-0.60586
TCONS_00004983	1	52457294	52500679	-	Nab1	ENSMUSG00000002881	Ngfi-A binding protein 1 [Source:MGI Symbol;Acc:MGI:107564]	-	gene	overlapping	0	6.01415	5.73671	6.19641	6.61026
TCONS_00004985	1	52600296	52600499	-	null					Not found	0	-0.555659	-0.883703	-0.800964	-0.60586
TCONS_00001011	1	52623486	52651919	+	Tmem194b	ENSMUSG00000043015	transmembrane protein 194B [Source:MGI Symbol;Acc:MGI:2444113]	+	gene	overlapping	0	1.56531	1.37561	0.351039	1.99959
TCONS_00004991	1	52656286	52728949	-	Mfsd6	ENSMUSG00000041439	major facilitator superfamily domain containing 6 [Source:MGI Symbol;Acc:MGI:1922925]	-	gene	overlapping	0	5.43585	5.66524	5.38113	5.97006
TCONS_00001019	1	52728148	52728605	+	Mfsd6	ENSMUSG00000041439	major facilitator superfamily domain containing 6 [Source:MGI Symbol;Acc:MGI:1922925]	-	gene	downstream	686	-0.555659	-0.883703	-0.800964	-0.60586
TCONS_00001020	1	52732104	52733441	+	null					Not found	0	-0.555659	-0.883703	-0.800964	-0.60586
TCONS_00004995	1	52785655	52817723	-	Inpp1	ENSMUSG00000026102	inositol polyphosphate-1-phosphatase [Source:MGI Symbol;Acc:MGI:104848]	-	gene	overlapping	0	0.740664	0.550966	0.791681	0.838624
TCONS_00001021	1	52845013	52921306	+	Hibch	ENSMUSG00000041426	3-hydroxyisobutyryl-Coenzyme A hydrolase [Source:MGI Symbol;Acc:MGI:1923792]	+	gene	overlapping	0	-0.12099	-0.782367	0.0236795	0.262623
TCONS_00005004	1	52922190	53020297	-	1700019D03Rik	ENSMUSG00000043629	RIKEN cDNA 1700019D03 gene [Source:MGI Symbol;Acc:MGI:1914330]	-	gene	overlapping	0	1.31965	1.67791	1.12501	0.0461428
TCONS_00001025	1	53112019	53112613	+	null					Not found	0	-0.504991	-0.883703	-0.800964	-0.529859
TCONS_00005008	1	53158577	53297652	-	1700019A02Rik	ENSMUSG00000060715	RIKEN cDNA 1700019A02 gene [Source:MGI Symbol;Acc:MGI:1916647]	-	gene	overlapping	0	7.0244	6.99581	7.02822	7.09908
TCONS_00001026	1	53296972	53311949	+	Pms1	ENSMUSG00000026098	postmeiotic segregation increased 1 (S. cerevisiae) [Source:MGI Symbol;Acc:MGI:1202302]	-	gene	overlapping	0	3.36806	3.60257	2.78411	2.63111
TCONS_00001028	1	53313403	53326343	+	Osgepl1	ENSMUSG00000026096	O-sialoglycoprotein endopeptidase-like 1 [Source:MGI Symbol;Acc:MGI:1919335]	+	gene	overlapping	0	5.6318	5.29464	4.98929	5.28704
TCONS_00005014	1	53344617	53352752	-	Asnsd1	ENSMUSG00000026095	asparagine synthetase domain containing 1 [Source:MGI Symbol;Acc:MGI:1917646]	-	gene	overlapping	0	5.9818	5.43813	6.14185	5.79357
TCONS_00005015	1	53396838	53706784	-	Dnahc7a	ENSMUSG00000096141	dynein, axonemal, heavy chain 7A [Source:MGI Symbol;Acc:MGI:2685838]	-	gene	overlapping	0	2.9221	3.00438	3.13981	2.83862
TCONS_00001032	1	53407628	53433828	+	Dnahc7a	ENSMUSG00000096141	dynein, axonemal, heavy chain 7A [Source:MGI Symbol;Acc:MGI:2685838]	-	gene	overlapping	0	0.652986	1.51993	0.40768	2.61078
TCONS_00005042	1	53755506	53785224	-	Stk17b	ENSMUSG00000026094	serine/threonine kinase 17b (apoptosis-inducing) [Source:MGI Symbol;Acc:MGI:2138162]	-	gene	overlapping	0	-0.555659	-0.883703	-0.800964	-0.60586
TCONS_00005044	1	53806882	54194048	-	Hecw2	ENSMUSG00000042807	HECT, C2 and WW domain containing E3 ubiquitin protein ligase 2 [Source:MGI Symbol;Acc:MGI:2685817]	-	gene	overlapping	0	4.84412	4.39971	4.59361	5.0196
TCONS_00001043	1	54200544	54201656	+	null					Not found	0	-0.555659	-0.883703	-0.800964	-0.60586
TCONS_00005050	1	54225377	54231398	-	null					Not found	0	-0.504991	-0.833035	-0.800964	-0.529859
TCONS_00005051	1	54231670	54235372	-	null					Not found	0	-0.555659	-0.883703	-0.800964	-0.60586
TCONS_00001047	1	54250683	54368727	+	Ccdc150	ENSMUSG00000025983	coiled-coil domain containing 150 [Source:MGI Symbol;Acc:MGI:1925266]	+	gene	overlapping	0	2.24189	2.65492	2.42731	2.20711
TCONS_00005053	1	54395499	54439089	-	Gtf3c3	ENSMUSG00000041303	general transcription factor IIIC, polypeptide 3 [Source:MGI Symbol;Acc:MGI:2138383]	-	gene	overlapping	0	4.4673	4.50272	4.23204	4.61783
TCONS_00005057	1	54442566	54455270	-	null					Not found	0	2.52346	2.66573	2.36584	2.90327
TCONS_00001052	1	54455525	54462739	+	null					Not found	0	-0.555659	-0.883703	-0.699629	-0.60586
TCONS_00005062	1	54473000	54557888	-	Pgap1	ENSMUSG00000073678	post-GPI attachment to proteins 1 [Source:MGI Symbol;Acc:MGI:2443342]	-	gene	overlapping	0	3.68214	3.26073	2.98667	2.79207
TCONS_00005063	1	54639510	54640820	-	null					Not found	0	-0.555659	-0.883703	-0.800964	-0.60586
TCONS_00005067	1	54645339	54926562	-	Ankrd44	ENSMUSG00000052331	ankyrin repeat domain 44 [Source:MGI Symbol;Acc:MGI:3045243]	-	gene	overlapping	0	8.3974	8.45308	8.49716	8.45976
TCONS_00005069	1	54952828	54960806	-	null					Not found	0	-0.555659	-0.883703	-0.699629	-0.60586
TCONS_00001053	1	54961597	54962486	+	null					Not found	0	-0.555659	-0.883703	-0.800964	-0.60586
TCONS_00005071	1	54965149	54967124	-	null					Not found	0	-0.555659	-0.883703	-0.800964	-0.60586
TCONS_00005072	1	54974596	54981970	-	null					Not found	0	-0.171658	-0.883703	-0.800964	-0.60586
TCONS_00005075	1	54985169	55027538	-	Sf3b1	ENSMUSG00000025982	splicing factor 3b, subunit 1 [Source:MGI Symbol;Acc:MGI:1932339]	-	gene	overlapping	0	8.4847	8.53666	8.64063	8.74672
TCONS_00001054	1	55027599	55028255	+	Sf3b1	ENSMUSG00000025982	splicing factor 3b, subunit 1 [Source:MGI Symbol;Acc:MGI:1932339]	-	gene	downstream	121	-0.555659	-0.883703	-0.800964	-0.60586
TCONS_00005076	1	55043453	55044248	-	null					Not found	0	-0.555659	-0.883703	-0.800964	-0.60586
TCONS_00001056	1	55046287	55047145	+	null					Not found	0	-0.555659	-0.883703	-0.800964	-0.60586
TCONS_00001057	1	55052185	55072701	+	Coq10b	ENSMUSG00000025981	coenzyme Q10 homolog B (S. cerevisiae) [Source:MGI Symbol;Acc:MGI:1915126]	+	gene	overlapping	0	4.17873	4.08674	4.006	3.99959
TCONS_00005082	1	55077835	55088243	-	Hspd1	ENSMUSG00000025980	heat shock protein 1 (chaperonin) [Source:MGI Symbol;Acc:MGI:96242]	-	gene	overlapping	0	5.62447	5.91359	6.38834	6.27323
TCONS_00001058	1	55087950	55093101	+	Hspd1	ENSMUSG00000025980	heat shock protein 1 (chaperonin) [Source:MGI Symbol;Acc:MGI:96242]	-	gene	overlapping	0	5.84831	5.69404	6.27047	6.34691
TCONS_00001060	1	55127297	55128287	+	null					Not found	0	1.03699	0.570597	0.351039	-0.529859
TCONS_00001061	1	55131038	55155049	+	Mob4	ENSMUSG00000025979	MOB family member 4, phocein [Source:MGI Symbol;Acc:MGI:104899]	+	gene	overlapping	0	5.10707	5.29513	5.17364	5.95573
TCONS_00005087	1	55170159	55226782	-	Rftn2	ENSMUSG00000025978	raftlin family member 2 [Source:MGI Symbol;Acc:MGI:1921263]	-	gene	overlapping	0	1.53213	1.92739	1.62016	-0.0298587
TCONS_00001064	1	55237164	55247341	+	Mars2	ENSMUSG00000046994	methionine-tRNA synthetase 2 (mitochondrial) [Source:MGI Symbol;Acc:MGI:2444136]	+	gene	overlapping	0	-0.504991	0.745954	0.898991	-0.0298587
TCONS_00005089	1	55247602	55363488	-	Boll	ENSMUSG00000025977	bol, boule-like (Drosophila) [Source:MGI Symbol;Acc:MGI:1922638]	-	gene	overlapping	0	-0.555659	-0.883703	-0.800964	-0.60586
TCONS_00001068	1	55406388	55754299	+	Plcl1	ENSMUSG00000038349	phospholipase C-like 1 [Source:MGI Symbol;Acc:MGI:3036262]	+	gene	overlapping	0	3.90462	3.76055	4.19239	3.30004
TCONS_00005093	1	55443733	55445064	-	Plcl1	ENSMUSG00000038349	phospholipase C-like 1 [Source:MGI Symbol;Acc:MGI:3036262]	+	gene	overlapping	0	3.15027	2.34457	0.212693	1.49959
TCONS_00005095	1	55911799	55912814	-	null					Not found	0	-0.555659	-0.883703	-0.800964	-0.60586
TCONS_00001077	1	55931087	55938586	+	null					Not found	0	-0.555659	0.217633	-0.800964	0.262622
TCONS_00005096	1	55948861	55950497	-	null					Not found	0	-0.555659	-0.883703	-0.800964	-0.60586
TCONS_00005097	1	55952682	55955372	-	null					Not found	0	-0.555659	-0.883703	-0.800964	-0.60586
TCONS_00001082	1	55955673	55972917	+	null					Not found	0	-0.504991	-0.0650327	-0.171308	0.0461428
TCONS_00005099	1	55960376	55975758	-	null					Not found	0	2.52346	1.85326	2.66813	3.49959
TCONS_00005100	1	56022853	56030455	-	null					Not found	0	-0.555659	-0.883703	-0.800964	-0.60586
TCONS_00005104	1	56425968	56426666	-	null					Not found	0	-0.555659	-0.883703	-0.800964	-0.60586
TCONS_00005105	1	56477939	56478554	-	null					Not found	0	-0.555659	-0.883703	-0.800964	-0.60586
TCONS_00005107	1	56483441	56639556	-	Hsfy2	ENSMUSG00000045336	heat shock transcription factor, Y linked 2 [Source:MGI Symbol;Acc:MGI:1918316]	-	gene	overlapping	0	0.929678	2.32494	1.72747	2.33862
TCONS_00001087	1	56782096	56782368	+	null					Not found	0	-0.555659	-0.883703	-0.800964	-0.60586
TCONS_00005119	1	56782137	56782326	-	null					Not found	0	-0.555659	-0.883703	-0.800964	-0.60586
TCONS_00005126	1	56793697	56978650	-	Satb2	ENSMUSG00000038331	special AT-rich sequence binding protein 2 [Source:MGI Symbol;Acc:MGI:2679336]	-	gene	overlapping	0	3.52346	4.38381	3.13099	3.56834
NOMERGE_TCONS_00000009	1	56971491	56975197	+	Satb2	ENSMUSG00000038331	special AT-rich sequence binding protein 2 [Source:MGI Symbol;Acc:MGI:2679336]	-	gene	overlapping	0	-0.12099	-0.782367	-0.800964	0.0461428
TCONS_00001089	1	57004178	57004910	+	null					Not found	0	-0.555659	-0.833035	-0.416963	-0.453857
TCONS_00005132	1	57349842	57353710	-	null					Not found	0	-0.555659	-0.883703	-0.800964	-0.60586
TCONS_00005134	1	57356725	57377569	-	1700066M21Rik	ENSMUSG00000038323	RIKEN cDNA 1700066M21 gene [Source:MGI Symbol;Acc:MGI:1920717]	+	gene	downstream	51	0.161676	-0.449034	-0.699629	-0.529859
TCONS_00001093	1	57377554	57385423	+	1700066M21Rik	ENSMUSG00000038323	RIKEN cDNA 1700066M21 gene [Source:MGI Symbol;Acc:MGI:1920717]	+	gene	overlapping	0	4.16272	4.6474	4.64359	4.80792
TCONS_00005139	1	57388240	57406674	-	1110034B05Rik	ENSMUSG00000048495	RIKEN cDNA 1110034B05 gene [Source:MGI Symbol;Acc:MGI:1915986]	-	gene	overlapping	0	3.11326	2.69056	2.75581	3.27586
TCONS_00001094	1	57406328	57417953	+	1110034B05Rik	ENSMUSG00000048495	RIKEN cDNA 1110034B05 gene [Source:MGI Symbol;Acc:MGI:1915986]	-	gene	overlapping	0	-0.454323	-0.833035	-0.800964	-0.0298587
TCONS_00001095	1	57491113	57493187	+	null					Not found	0	-0.555659	-0.883703	-0.800964	-0.60586
TCONS_00001097	1	57493293	57498837	+	null					Not found	0	-0.555659	-0.883703	-0.800964	-0.60586
TCONS_00001099	1	57517095	57531911	+	null					Not found	0	-0.504991	-0.833035	-0.800964	-0.60586
TCONS_00001102	1	57774600	57946965	+	Spats2l	ENSMUSG00000038305	spermatogenesis associated, serine-rich 2-like [Source:MGI Symbol;Acc:MGI:1914448]	+	gene	overlapping	0	0.0739974	0.820085	0.791681	3.06834
TCONS_00005141	1	57909835	57919322	-	Spats2l	ENSMUSG00000038305	spermatogenesis associated, serine-rich 2-like [Source:MGI Symbol;Acc:MGI:1914448]	+	gene	overlapping	0	-0.555659	-0.883703	-0.800964	-0.529859
TCONS_00005143	1	57955248	57970159	-	Kctd18	ENSMUSG00000054770	potassium channel tetramerisation domain containing 18 [Source:MGI Symbol;Acc:MGI:3603813]	-	gene	overlapping	0	3.28862	3.63255	3.56761	3.89636
TCONS_00001105	1	57995954	58025899	+	Kctd18	ENSMUSG00000054770	potassium channel tetramerisation domain containing 18 [Source:MGI Symbol;Acc:MGI:3603813]	-	gene	overlapping	0	5.03569	4.93066	5.41363	5.63298
TCONS_00001107	1	58029931	58070879	+	Aox1	ENSMUSG00000063558	aldehyde oxidase 1 [Source:MGI Symbol;Acc:MGI:88035]	+	gene	overlapping	0	-0.555659	-0.883703	-0.800964	-0.60586
TCONS_00001108	1	58167376	58179370	+	Aox3	ENSMUSG00000064294	aldehyde oxidase 3 [Source:MGI Symbol;Acc:MGI:1918974]	+	gene	overlapping	0	-0.555659	-0.883703	-0.800964	-0.60586
TCONS_00001109	1	58210397	58268597	+	Aox4	ENSMUSG00000038242	aldehyde oxidase 4 [Source:MGI Symbol;Acc:MGI:1919122]	+	gene	overlapping	0	2.45043	2.53473	3.70595	5.2598
TCONS_00005145	1	58254117	58315656	-	Aox4	ENSMUSG00000038242	aldehyde oxidase 4 [Source:MGI Symbol;Acc:MGI:1919122]	+	gene	overlapping	0	-0.555659	-0.883703	-0.800964	-0.60586
TCONS_00005150	1	58383467	58392762	-	Bzw1	ENSMUSG00000051223	basic leucine zipper and W2 domains 1 [Source:MGI Symbol;Acc:MGI:1914132]	+	gene	downstream	374	-0.555659	-0.883703	-0.800964	-0.60586
TCONS_00001111	1	58392817	58407355	+	Bzw1	ENSMUSG00000051223	basic leucine zipper and W2 domains 1 [Source:MGI Symbol;Acc:MGI:1914132]	+	gene	overlapping	0	5.6863	5.89671	5.36176	5.85945
TCONS_00005155	1	58412000	58424153	-	Clk1	ENSMUSG00000026034	CDC-like kinase 1 [Source:MGI Symbol;Acc:MGI:107403]	-	gene	overlapping	0	7.37395	7.07964	7.76158	7.59149
TCONS_00005158	1	58425844	58449268	-	Ppil3	ENSMUSG00000026035	peptidylprolyl isomerase (cyclophilin)-like 3 [Source:MGI Symbol;Acc:MGI:1917475]	-	gene	overlapping	0	5.3539	5.04727	5.57985	5.63111
TCONS_00001114	1	58426043	58427432	+	Clk1	ENSMUSG00000026034	CDC-like kinase 1 [Source:MGI Symbol;Acc:MGI:107403]	-	gene	downstream	1977	-0.555659	-0.883703	-0.800964	-0.60586
CUFF.1183.1	1	58435404	58435777	+	Ppil3	ENSMUSG00000026035	peptidylprolyl isomerase (cyclophilin)-like 3 [Source:MGI Symbol;Acc:MGI:1917475]	-	gene	overlapping	0	-0.555659	-0.883703	-0.800964	-0.60586
TCONS_00001115	1	58440140	58441399	+	Ppil3	ENSMUSG00000026035	peptidylprolyl isomerase (cyclophilin)-like 3 [Source:MGI Symbol;Acc:MGI:1917475]	-	gene	overlapping	0	-0.555659	-0.883703	-0.800964	-0.529859
TCONS_00001116	1	58444630	58462276	+	Ppil3	ENSMUSG00000026035	peptidylprolyl isomerase (cyclophilin)-like 3 [Source:MGI Symbol;Acc:MGI:1917475]	-	gene	overlapping	0	4.2671	4.57064	3.52686	2.83862
TCONS_00005162	1	58462771	58505109	-	Nif3l1	ENSMUSG00000026036	Ngg1 interacting factor 3-like 1 (S. pombe) [Source:MGI Symbol;Acc:MGI:1929485]	+	gene	overlapping	0	6.76972	6.61642	6.94681	6.76137
NOMERGE_TCONS_00000010	1	58505152	58523230	+	Gm15834	ENSMUSG00000085054	predicted gene 15834 [Source:MGI Symbol;Acc:MGI:3802168]	+	gene	overlapping	0	-0.555659	-0.883703	-0.800964	-0.60586
TCONS_00005163	1	58514570	58515773	-	Gm15834	ENSMUSG00000085054	predicted gene 15834 [Source:MGI Symbol;Acc:MGI:3802168]	+	gene	overlapping	0	-0.555659	-0.883703	-0.221976	-0.60586
TCONS_00005167	1	58522797	58586476	-	Gm15834	ENSMUSG00000085054	predicted gene 15834 [Source:MGI Symbol;Acc:MGI:3802168]	+	gene	overlapping	0	6.04712	6.11444	5.94359	5.77445
TCONS_00001119	1	58586384	58595964	+	Ndufb3	ENSMUSG00000026032	NADH dehydrogenase (ubiquinone) 1 beta subcomplex 3 [Source:MGI Symbol;Acc:MGI:1913745]	+	gene	overlapping	0	3.42696	3.83464	2.7943	3.58455
TCONS_00005169	1	58658117	58867375	-	Als2cr12	ENSMUSG00000047528	amyotrophic lateral sclerosis 2 (juvenile) chromosome region, candidate 12 (human) [Source:MGI Symbol;Acc:MGI:1918359]	-	gene	overlapping	0	4.68723	4.89636	3.98463	4.37346
CUFF.1607.1	1	58704286	58706687	+	null					Not found	0	-0.555659	-0.883703	-0.699629	-0.60586
TCONS_00001125	1	58730426	58758884	+	Cflar	ENSMUSG00000026031	CASP8 and FADD-like apoptosis regulator [Source:MGI Symbol;Acc:MGI:1336166]	+	gene	overlapping	0	3.95662	4.07425	3.84606	4.1361
TCONS_00001126	1	58802502	58847503	+	Casp8	ENSMUSG00000026029	caspase 8 [Source:MGI Symbol;Acc:MGI:1261423]	+	gene	overlapping	0	4.8661	5.60209	4.90392	4.51446
TCONS_00005187	1	58900449	58973491	-	Trak2	ENSMUSG00000026028	trafficking protein, kinesin binding 2 [Source:MGI Symbol;Acc:MGI:1918077]	-	gene	overlapping	0	5.59002	5.75027	5.1226	5.81244
TCONS_00001131	1	58973501	58995715	+	Stradb	ENSMUSG00000026027	STE20-related kinase adaptor beta [Source:MGI Symbol;Acc:MGI:2144047]	+	gene	overlapping	0	6.01531	6.10858	5.78746	6.1826
TCONS_00005188	1	59050506	59094900	-	Als2cr11	ENSMUSG00000072295	amyotrophic lateral sclerosis 2 (juvenile) chromosome region, candidate 11 (human) [Source:MGI Symbol;Acc:MGI:1920713]	-	gene	overlapping	0	-0.555659	-0.782367	-0.171308	-0.60586
CUFF.1082.1	1	59058865	59059459	+	Als2cr11	ENSMUSG00000072295	amyotrophic lateral sclerosis 2 (juvenile) chromosome region, candidate 11 (human) [Source:MGI Symbol;Acc:MGI:1920713]	-	gene	overlapping	0	-0.555659	-0.883703	-0.800964	-0.60586
TCONS_00005190	1	59100587	59120067	-	Tmem237	ENSMUSG00000038079	transmembrane protein 237 [Source:MGI Symbol;Acc:MGI:2138365]	-	gene	overlapping	0	4.98671	4.36574	4.16328	4.10041
NOMERGE_TCONS_00000012	1	59119833	59122139	+	Tmem237	ENSMUSG00000038079	transmembrane protein 237 [Source:MGI Symbol;Acc:MGI:2138365]	-	gene	overlapping	0	-0.555659	-0.883703	-0.800964	-0.60586
TCONS_00005191	1	59120954	59126089	-	Mpp4	ENSMUSG00000079550	membrane protein, palmitoylated 4 (MAGUK p55 subfamily member 4) [Source:MGI Symbol;Acc:MGI:2386681]	-	gene	overlapping	0	-0.555659	-0.304714	-0.800964	-0.60586
TCONS_00005193	1	59133465	59137136	-	Mpp4	ENSMUSG00000079550	membrane protein, palmitoylated 4 (MAGUK p55 subfamily member 4) [Source:MGI Symbol;Acc:MGI:2386681]	-	gene	overlapping	0	-0.555659	-0.499701	-0.750297	-0.60586
TCONS_00005194	1	59139211	59140176	-	Mpp4	ENSMUSG00000079550	membrane protein, palmitoylated 4 (MAGUK p55 subfamily member 4) [Source:MGI Symbol;Acc:MGI:2386681]	-	gene	overlapping	0	-0.555659	-0.883703	-0.800964	-0.60586
TCONS_00005195	1	59143756	59149082	-	Mpp4	ENSMUSG00000079550	membrane protein, palmitoylated 4 (MAGUK p55 subfamily member 4) [Source:MGI Symbol;Acc:MGI:2386681]	-	gene	overlapping	0	-0.555659	-0.883703	-0.750297	-0.60586
TCONS_00005196	1	59159783	59237280	-	Mpp4	ENSMUSG00000079550	membrane protein, palmitoylated 4 (MAGUK p55 subfamily member 4) [Source:MGI Symbol;Acc:MGI:2386681]	-	gene	overlapping	0	5.81291	5.98526	5.57847	6.42458
TCONS_00001134	1	59256907	59355251	+	Cdk15	ENSMUSG00000026023	cyclin-dependent kinase 15 [Source:MGI Symbol;Acc:MGI:3583944]	+	gene	overlapping	0	4.19973	4.39809	4.08579	3.08987
TCONS_00005199	1	59350273	59352094	-	Cdk15	ENSMUSG00000026023	cyclin-dependent kinase 15 [Source:MGI Symbol;Acc:MGI:3583944]	+	gene	overlapping	0	-0.555659	-0.883703	-0.800964	-0.60586
TCONS_00005200	1	59367017	59367957	-	null					Not found	0	-0.555659	-0.883703	-0.800964	-0.60586
TCONS_00001141	1	59378356	59393570	+	null					Not found	0	4.37852	3.88051	3.8272	4.7645
TCONS_00001143	1	59406048	59406596	+	null					Not found	0	-0.555659	-0.883703	-0.800964	-0.60586
TCONS_00005202	1	59453930	59457468	-	null					Not found	0	0.212343	-0.304714	0.684372	-0.60586
TCONS_00001144	1	59456722	59457590	+	null					Not found	0	-0.555659	-0.883703	-0.800964	-0.60586
TCONS_00001145	1	59459357	59465359	+	null					Not found	0	-0.555659	-0.883703	-0.699629	-0.60586
TCONS_00001146	1	59481892	59487157	+	Fzd7	ENSMUSG00000041075	frizzled homolog 7 (Drosophila) [Source:MGI Symbol;Acc:MGI:108570]	+	gene	overlapping	0	3.64689	4.05694	3.77066	3.68421
TCONS_00005204	1	59486977	59487777	-	Fzd7	ENSMUSG00000041075	frizzled homolog 7 (Drosophila) [Source:MGI Symbol;Acc:MGI:108570]	+	gene	upstream	30	-0.555659	-0.883703	-0.800964	-0.60586
TCONS_00005205	1	59504688	59505096	-	null					Not found	0	-0.555659	-0.883703	-0.800964	-0.60586
TCONS_00001148	1	59516264	59636385	+	Gm973	ENSMUSG00000047361	predicted gene 973 [Source:MGI Symbol;Acc:MGI:2685819]	+	gene	overlapping	0	4.60642	4.5102	4.90161	4.71384
TCONS_00005207	1	59639434	59671096	-	Sumo1	ENSMUSG00000026021	SMT3 suppressor of mif two 3 homolog 1 (yeast) [Source:MGI Symbol;Acc:MGI:1197010]	-	gene	overlapping	0	6.1657	6.09376	6.7525	6.78811
TCONS_00001153	1	59684882	59718674	+	Nop58	ENSMUSG00000026020	NOP58 ribonucleoprotein homolog (yeast) [Source:MGI Symbol;Acc:MGI:1933184]	+	gene	overlapping	0	6.96606	6.78359	7.4057	7.22023
TCONS_00005208	1	59759492	59759834	-	null					Not found	0	-0.555659	-0.883703	-0.800964	-0.60586
TCONS_00001159	1	59763420	59878009	+	Bmpr2	ENSMUSG00000067336	bone morphogenic protein receptor, type II (serine/threonine kinase) [Source:MGI Symbol;Acc:MGI:1095407]	+	gene	overlapping	0	5.63017	6.15554	5.53783	6.10949
TCONS_00005211	1	59873551	59877595	-	null					Not found	0	-0.504991	-0.883703	-0.800964	-0.60586
TCONS_00005212	1	59891830	59892590	-	null					Not found	0	-0.555659	-0.883703	-0.800964	-0.60586
TCONS_00001161	1	59912753	59988724	+	Fam117b	ENSMUSG00000041040	family with sequence similarity 117, member B [Source:MGI Symbol;Acc:MGI:1920000]	+	gene	overlapping	0	7.84107	8.04245	7.18401	7.28978
TCONS_00005214	1	59989070	60043497	-	Ica1l	ENSMUSG00000026018	islet cell autoantigen 1-like [Source:MGI Symbol;Acc:MGI:1917625]	-	gene	overlapping	0	5.26322	5.19984	4.89142	5.42837
TCONS_00001165	1	60044272	60044956	+	Ica1l	ENSMUSG00000026018	islet cell autoantigen 1-like [Source:MGI Symbol;Acc:MGI:1917625]	-	gene	downstream	1185	-0.555659	-0.883703	-0.800964	-0.60586
TCONS_00005224	1	60047155	60048827	-	null					Not found	0	-0.555659	-0.883703	-0.800964	-0.60586
TCONS_00001166	1	60049849	60055903	+	null					Not found	0	-0.555659	-0.883703	-0.800964	-0.60586
TCONS_00005225	1	60055768	60056767	-	null					Not found	0	-0.555659	-0.883703	-0.800964	-0.60586
TCONS_00001170	1	60064652	60072361	+	null					Not found	0	-0.555659	-0.883703	-0.800964	-0.60586
TCONS_00005226	1	60073576	60105319	-	Wdr12	ENSMUSG00000026019	WD repeat domain 12 [Source:MGI Symbol;Acc:MGI:1927241]	-	gene	overlapping	0	3.82416	4.09192	4.60315	4.49355
TCONS_00001172	1	60098103	60153915	+	Wdr12	ENSMUSG00000026019	WD repeat domain 12 [Source:MGI Symbol;Acc:MGI:1927241]	-	gene	overlapping	0	-0.403656	-0.782367	-0.315628	0.838624
TCONS_00001176	1	60180509	60338328	+	Nbeal1	ENSMUSG00000073664	neurobeachin like 1 [Source:MGI Symbol;Acc:MGI:2444343]	+	gene	overlapping	0	4.15997	4.38028	3.90719	4.57378
TCONS_00001178	1	60343315	60388066	+	Cyp20a1	ENSMUSG00000049439	cytochrome P450, family 20, subfamily a, polypeptide 1 [Source:MGI Symbol;Acc:MGI:1925201]	+	gene	overlapping	0	2.30611	3.00641	2.7028	2.44982
TCONS_00001184	1	60409042	60481917	+	Abi2	ENSMUSG00000026782	abl-interactor 2 [Source:MGI Symbol;Acc:MGI:106913]	+	gene	overlapping	0	3.46314	4.12984	2.88682	3.08987
TCONS_00005234	1	60483196	60567104	-	Raph1	ENSMUSG00000026014	Ras association (RalGDS/AF-6) and pleckstrin homology domains 1 [Source:MGI Symbol;Acc:MGI:1924550]	-	gene	overlapping	0	5.29899	5.21213	5.05608	4.57986
TCONS_00001186	1	60584135	60607054	+	null					Not found	0	0.596344	0.274275	3.88403	1.63111
NOMERGE_TCONS_00000013	1	60700872	60701937	+	null					Not found	0	-0.555659	-0.883703	-0.800964	-0.60586
TCONS_00001187	1	60703918	60705656	+	null					Not found	0	4.92388	4.62536	3.48181	4.08455
TCONS_00001189	1	60809116	60809942	+	null					Not found	0	-0.555659	-0.883703	-0.800964	-0.60586
TCONS_00001191	1	60886975	60915832	+	Ctla4	ENSMUSG00000026011	cytotoxic T-lymphocyte-associated protein 4 [Source:MGI Symbol;Acc:MGI:88556]	+	gene	overlapping	0	0.212343	-0.833035	0.764477	0.470141
TCONS_00001195	1	60921211	60927686	+	null					Not found	0	-0.555659	-0.782367	-0.800964	-0.0298587
TCONS_00001196	1	60930731	60931780	+	null					Not found	0	-0.555659	-0.883703	-0.800964	-0.60586
TCONS_00001199	1	61047586	61068271	+	null					Not found	0	1.37032	1.75478	2.27816	1.33862
TCONS_00001206	1	61301080	61316709	+	Gm11587	ENSMUSG00000085248	predicted gene 11587 [Source:MGI Symbol;Acc:MGI:3652110]	+	gene	overlapping	0	3.64158	3.87169	4.52979	3.62355
TCONS_00005242	1	61313777	61314479	-	null					Not found	0	-0.555659	-0.883703	-0.800964	-0.60586
TCONS_00001217	1	61318160	61319112	+	null					Not found	0	-0.555659	-0.883703	-0.800964	-0.60586
TCONS_00005243	1	61345236	61345513	-	null					Not found	0	-0.555659	-0.883703	-0.800964	-0.60586
TCONS_00001218	1	61355403	61355797	+	null					Not found	0	-0.555659	-0.883703	-0.800964	-0.60586
TCONS_00001219	1	61378432	61395904	+	9530026F06Rik	ENSMUSG00000085447	RIKEN cDNA 9530026F06 gene [Source:MGI Symbol;Acc:MGI:1924591]	+	gene	overlapping	0	-0.555659	-0.883703	-0.800964	-0.60586
TCONS_00001224	1	61436179	61477275	+	Gm11588	ENSMUSG00000086408	predicted gene 11588 [Source:MGI Symbol;Acc:MGI:3650951]	+	gene	overlapping	0	1.65299	1.0301	0.653336	2.29207
TCONS_00001230	1	61638585	62642284	+	Pard3b	ENSMUSG00000052062	par-3 partitioning defective 3 homolog B (C. elegans) [Source:MGI Symbol;Acc:MGI:1919301]	+	gene	overlapping	0	1.98632	2.99906	2.55594	2.55733
NOMERGE_TCONS_00000046	1	61767415	61851462	-	Pard3b	ENSMUSG00000052062	par-3 partitioning defective 3 homolog B (C. elegans) [Source:MGI Symbol;Acc:MGI:1919301]	+	gene	overlapping	0	-0.555659	-0.883703	-0.800964	-0.60586
TCONS_00005244	1	62068937	62176383	-	Pard3b	ENSMUSG00000052062	par-3 partitioning defective 3 homolog B (C. elegans) [Source:MGI Symbol;Acc:MGI:1919301]	+	gene	overlapping	0	1.58877	0.934967	0.546026	0.546143
TCONS_00005250	1	62571134	62591370	-	Pard3b	ENSMUSG00000052062	par-3 partitioning defective 3 homolog B (C. elegans) [Source:MGI Symbol;Acc:MGI:1919301]	+	gene	overlapping	0	1.59634	1.97806	0.791682	0.546143
TCONS_00001243	1	62696378	62702651	+	Nrp2	ENSMUSG00000025969	neuropilin 2 [Source:MGI Symbol;Acc:MGI:1100492]	+	gene	downstream	634	0.652986	0.217633	0.633704	-0.60586
TCONS_00001245	1	62703285	62818695	+	Nrp2	ENSMUSG00000025969	neuropilin 2 [Source:MGI Symbol;Acc:MGI:1100492]	+	gene	overlapping	0	0.37032	0.324942	-0.0329622	-0.529859
TCONS_00001251	1	63006032	63014795	+	Ino80d	ENSMUSG00000040865	INO80 complex subunit D [Source:MGI Symbol;Acc:MGI:3027003]	-	gene	overlapping	0	4.66275	4.9914	4.87748	5.26032
TCONS_00005251	1	63012102	63012336	-	Ino80d	ENSMUSG00000040865	INO80 complex subunit D [Source:MGI Symbol;Acc:MGI:3027003]	-	gene	overlapping	0	-0.555659	-0.883703	-0.800964	-0.60586
TCONS_00005255	1	63047801	63114667	-	Ino80d	ENSMUSG00000040865	INO80 complex subunit D [Source:MGI Symbol;Acc:MGI:3027003]	-	gene	overlapping	0	4.95662	4.33624	5.28732	4.6082
TCONS_00001255	1	63114674	63115464	+	Gm11602	ENSMUSG00000084799	predicted gene 11602 [Source:MGI Symbol;Acc:MGI:3651861]	+	gene	overlapping	0	-0.555659	-0.883703	-0.800964	-0.60586
TCONS_00005257	1	63143593	63176914	-	Gm11602	ENSMUSG00000084799	predicted gene 11602 [Source:MGI Symbol;Acc:MGI:3651861]	+	gene	overlapping	0	4.73841	4.9639	4.90597	5.06423
TCONS_00001256	1	63176825	63180486	+	Eef1b2	ENSMUSG00000025967	eukaryotic translation elongation factor 1 beta 2 [Source:MGI Symbol;Acc:MGI:1929520]	+	gene	overlapping	0	6.68221	6.77913	6.63967	7.18202
TCONS_00005259	1	63181371	63229583	-	Gpr1	ENSMUSG00000046856	G protein-coupled receptor 1 [Source:MGI Symbol;Acc:MGI:2385324]	-	gene	overlapping	0	6.49436	6.04228	6.13685	6.24652
TCONS_00005265	1	63244691	63244849	-	null					Not found	0	-0.555659	-0.883703	-0.800964	-0.60586
TCONS_00001263	1	63273265	63314639	+	AL669947.1	ENSMUSG00000092705	No description	-	gene	overlapping	0	-0.504991	-0.833035	0.212693	-0.60586
TCONS_00005266	1	63358458	63359153	-	null					Not found	0	-0.555659	-0.883703	-0.800964	-0.60586
TCONS_00005269	1	63361568	63371293	-	null					Not found	0	-0.555659	-0.782367	-0.699629	-0.453857
TCONS_00001265	1	63445935	63596276	+	Adam23	ENSMUSG00000025964	a disintegrin and metallopeptidase domain 23 [Source:MGI Symbol;Acc:MGI:1345162]	+	gene	overlapping	0	2.06045	0.708943	-0.366296	0.762622
TCONS_00001271	1	63730563	63754655	+	Fastkd2	ENSMUSG00000025962	FAST kinase domains 2 [Source:MGI Symbol;Acc:MGI:1922869]	+	gene	overlapping	0	3.88595	3.83323	3.63221	4.00408
TCONS_00005273	1	63774091	63774309	-	null					Not found	0	-0.555659	-0.883703	-0.800964	-0.60586
TCONS_00001275	1	64029281	64032927	+	Klf7	ENSMUSG00000025959	Kruppel-like factor 7 (ubiquitous) [Source:MGI Symbol;Acc:MGI:1935151]	-	gene	overlapping	0	-0.555659	-0.883703	-0.800964	-0.60586
TCONS_00005281	1	64029447	64122314	-	Klf7	ENSMUSG00000025959	Kruppel-like factor 7 (ubiquitous) [Source:MGI Symbol;Acc:MGI:1935151]	-	gene	overlapping	0	5.89107	5.65284	5.23044	5.39289
TCONS_00005286	1	64321484	64322041	-	null					Not found	0	-0.454323	-0.833035	-0.366296	-0.529859
TCONS_00001278	1	64375223	64378241	+	null					Not found	0	-0.555659	-0.883703	-0.800964	-0.60586
TCONS_00005287	1	64401594	64405698	-	null					Not found	0	2.4836	2.5854	4.13432	3.77381
TCONS_00005291	1	64406403	64433006	-	null					Not found	0	3.41615	3.34337	4.28322	3.99355
TCONS_00005301	1	64528725	64529331	-	null					Not found	0	-0.555659	-0.883703	-0.800964	-0.60586
TCONS_00001281	1	64532798	64604547	+	Creb1	ENSMUSG00000025958	cAMP responsive element binding protein 1 [Source:MGI Symbol;Acc:MGI:88494]	+	gene	overlapping	0	2.52346	2.95339	2.86795	3.65814
TCONS_00005303	1	64606473	64617579	-	Mettl21a	ENSMUSG00000025956	methyltransferase like 21A [Source:MGI Symbol;Acc:MGI:1914349]	-	gene	overlapping	0	-0.454323	-0.499701	-0.800964	-0.60586
TCONS_00001288	1	64652619	64659910	+	null					Not found	0	-0.555659	-0.499701	-0.366296	-0.60586
TCONS_00005305	1	64679871	64690659	-	2810408I11Rik	ENSMUSG00000087213	RIKEN cDNA 2810408I11 gene [Source:MGI Symbol;Acc:MGI:1917191]	-	gene	overlapping	0	5.34088	4.12452	4.60418	4.52178
TCONS_00001292	1	64690455	64725644	+	2810408I11Rik	ENSMUSG00000087213	RIKEN cDNA 2810408I11 gene [Source:MGI Symbol;Acc:MGI:1917191]	-	gene	overlapping	0	6.947	6.72981	7.36837	7.22158
TCONS_00005308	1	64729306	64737775	-	Fzd5	ENSMUSG00000045005	frizzled homolog 5 (Drosophila) [Source:MGI Symbol;Acc:MGI:108571]	-	gene	overlapping	0	0.791332	0.796622	-0.800964	0.546143
TCONS_00005310	1	64738052	64743213	-	Fzd5	ENSMUSG00000045005	frizzled homolog 5 (Drosophila) [Source:MGI Symbol;Acc:MGI:108571]	-	gene	downstream	302	-0.555659	-0.883703	-0.800964	-0.60586
TCONS_00005314	1	64748078	64750575	-	null					Not found	0	-0.454323	-0.883703	-0.800964	-0.60586
TCONS_00001293	1	64749557	64750703	+	null					Not found	0	-0.555659	-0.883703	-0.800964	-0.60586
TCONS_00005315	1	64785983	64956824	-	Plekhm3	ENSMUSG00000051344	pleckstrin homology domain containing, family M, member 3 [Source:MGI Symbol;Acc:MGI:2443627]	-	gene	overlapping	0	4.97862	5.10624	4.90161	4.77483
TCONS_00005323	1	65012689	65032769	-	Akr1cl	ENSMUSG00000025955	aldo-keto reductase family 1, member C-like [Source:MGI Symbol;Acc:MGI:1918111]	-	gene	overlapping	0	2.96629	3.33486	3.23232	4.01886
TCONS_00001294	1	65028080	65028941	+	Akr1cl	ENSMUSG00000025955	aldo-keto reductase family 1, member C-like [Source:MGI Symbol;Acc:MGI:1918111]	-	gene	overlapping	0	-0.555659	-0.883703	-0.800964	-0.60586
TCONS_00005325	1	65090857	65095088	-	null					Not found	0	4.2664	5.09929	4.83478	6.29469
TCONS_00001296	1	65095624	65096190	+	null					Not found	0	-0.555659	-0.883703	-0.800964	-0.60586
TCONS_00005327	1	65100389	65127994	-	Cryga	ENSMUSG00000044429	crystallin, gamma A [Source:MGI Symbol;Acc:MGI:88521]	-	gene	overlapping	0	2.7603	2.48889	3.10015	2.42359
TCONS_00005335	1	65158616	65179181	-	Idh1	ENSMUSG00000025950	isocitrate dehydrogenase 1 (NADP+), soluble [Source:MGI Symbol;Acc:MGI:96413]	-	gene	overlapping	0	3.88647	4.14201	3.86312	4.00408
TCONS_00005336	1	65181630	65186541	-	Idh1	ENSMUSG00000025950	isocitrate dehydrogenase 1 (NADP+), soluble [Source:MGI Symbol;Acc:MGI:96413]	-	gene	overlapping	0	-0.555659	-0.883703	-0.800964	-0.60586
TCONS_00001298	1	65186647	65278682	+	Pikfyve	ENSMUSG00000025949	phosphoinositide kinase, FYVE finger containing [Source:MGI Symbol;Acc:MGI:1335106]	+	gene	overlapping	0	5.13702	5.59218	5.39688	6.06663
TCONS_00005338	1	65358799	65362118	-	Pth2r	ENSMUSG00000025946	parathyroid hormone 2 receptor [Source:MGI Symbol;Acc:MGI:2180917]	+	gene	overlapping	0	-0.555659	-0.883703	-0.750297	-0.60586
TCONS_00005339	1	65435059	65439687	-	null					Not found	0	0.430794	2.29391	0.741014	2.79207
TCONS_00005341	1	65535680	65537667	-	null					Not found	0	-0.555659	-0.883703	-0.800964	-0.60586
TCONS_00001308	1	65539526	65559142	+	null					Not found	0	0.161676	0.708943	1.51499	0.707107
TCONS_00005342	1	65550464	65551237	-	null					Not found	0	-0.555659	-0.883703	-0.800964	-0.60586
TCONS_00001316	1	65693844	65694593	+	null					Not found	0	-0.555659	-0.883703	-0.800964	-0.60586
TCONS_00001317	1	65814750	65815036	+	null					Not found	0	-0.555659	-0.883703	-0.800964	-0.60586
TCONS_00005345	1	65889452	65891961	-	null					Not found	0	-0.555659	-0.883703	-0.800964	-0.60586
TCONS_00005347	1	66032183	66032925	-	null					Not found	0	-0.555659	-0.499701	-0.800964	-0.60586
TCONS_00001318	1	66033085	66033425	+	null					Not found	0	1.12467	0.537419	0.684372	0.838624
TCONS_00005348	1	66065057	66065703	-	null					Not found	0	-0.504991	-0.833035	-0.800964	-0.529859
TCONS_00005349	1	66095977	66097354	-	null					Not found	0	-0.555659	-0.883703	-0.800964	-0.60586
TCONS_00001319	1	66175259	66442583	+	Mtap2	ENSMUSG00000015222	microtubule-associated protein 2 [Source:MGI Symbol;Acc:MGI:97175]	+	gene	overlapping	0	5.28708	4.84353	4.96383	5.23988
NOMERGE_TCONS_00000047	1	66322276	66328796	-	Mtap2	ENSMUSG00000015222	microtubule-associated protein 2 [Source:MGI Symbol;Acc:MGI:97175]	+	gene	overlapping	0	-0.555659	-0.883703	-0.800964	-0.60586
TCONS_00001321	1	66468367	66699882	+	Unc80	ENSMUSG00000055567	unc-80 homolog (C. elegans) [Source:MGI Symbol;Acc:MGI:2652882]	+	gene	overlapping	0	3.9606	4.68521	3.62069	4.21829
CUFF.1224.1	1	66620096	66620938	-	Unc80	ENSMUSG00000055567	unc-80 homolog (C. elegans) [Source:MGI Symbol;Acc:MGI:2652882]	+	gene	overlapping	0	-0.555659	-0.883703	-0.800964	-0.60586
CUFF.1225.1	1	66637097	66637688	-	Unc80	ENSMUSG00000055567	unc-80 homolog (C. elegans) [Source:MGI Symbol;Acc:MGI:2652882]	+	gene	overlapping	0	-0.555659	-0.883703	-0.800964	-0.60586
TCONS_00005351	1	66641929	66674256	-	Unc80	ENSMUSG00000055567	unc-80 homolog (C. elegans) [Source:MGI Symbol;Acc:MGI:2652882]	+	gene	overlapping	0	3.33445	2.89176	3.60267	2.63111
TCONS_00001327	1	66700566	66719805	+	Rpe	ENSMUSG00000026005	ribulose-5-phosphate-3-epimerase [Source:MGI Symbol;Acc:MGI:1913896]	+	gene	overlapping	0	5.25663	5.39845	6.02586	5.98133
TCONS_00005355	1	66719248	66818265	-	Rpe	ENSMUSG00000026005	ribulose-5-phosphate-3-epimerase [Source:MGI Symbol;Acc:MGI:1913896]	+	gene	overlapping	0	3.4023	3.01523	3.25176	3.29207
CUFF.1254.1	1	66730710	66732523	+	Kansl1l	ENSMUSG00000026004	KAT8 regulatory NSL complex subunit 1-like [Source:MGI Symbol;Acc:MGI:1915941]	-	gene	overlapping	0	-0.555659	-0.883703	-0.800964	-0.60586
TCONS_00005365	1	66830839	66863295	-	Acadl	ENSMUSG00000026003	acyl-Coenzyme A dehydrogenase, long-chain [Source:MGI Symbol;Acc:MGI:87866]	-	gene	overlapping	0	1.84797	1.78905	2.75093	3.70711
TCONS_00005367	1	66925023	66935350	-	Myl1	ENSMUSG00000061816	myosin, light polypeptide 1 [Source:MGI Symbol;Acc:MGI:97269]	-	gene	overlapping	0	-0.555659	-0.883703	-0.800964	-0.60586
TCONS_00005373	1	67000517	67039261	-	Lancl1	ENSMUSG00000026000	LanC (bacterial lantibiotic synthetase component C)-like 1 [Source:MGI Symbol;Acc:MGI:1336997]	-	gene	overlapping	0	6.42547	6.42747	6.25542	6.19317
TCONS_00001329	1	67061097	67231259	+	Cps1	ENSMUSG00000025991	carbamoyl-phosphate synthetase 1 [Source:MGI Symbol;Acc:MGI:891996]	+	gene	overlapping	0	0.0739973	-0.398366	-0.366296	1.99959
CUFF.1235.1	1	67105539	67105971	-	null					Not found	0	-0.555659	-0.883703	-0.800964	-0.60586
TCONS_00005374	1	67203363	67207191	-	Cps1	ENSMUSG00000025991	carbamoyl-phosphate synthetase 1 [Source:MGI Symbol;Acc:MGI:891996]	+	gene	overlapping	0	1.7603	2.23223	1.84832	4.28603
TCONS_00001331	1	67249087	67324385	+	Gm15668	ENSMUSG00000086204	predicted gene 15668 [Source:MGI Symbol;Acc:MGI:3783110]	+	gene	overlapping	0	3.01547	3.61369	3.68753	4.12985
TCONS_00001333	1	67460160	67498533	+	null					Not found	0	-0.504991	-0.833035	-0.800964	-0.529859
TCONS_00001339	1	67581570	67587036	+	null					Not found	0	-0.12099	1.83972	0.986669	3.6842
TCONS_00001341	1	67609022	67609674	+	null					Not found	0	-0.555659	-0.883703	-0.800964	-0.60586
TCONS_00005376	1	67764602	67765914	-	null					Not found	0	-0.555659	-0.883703	-0.800964	-0.60586
TCONS_00001346	1	68005070	68025921	+	Gm15671	ENSMUSG00000087329	predicted gene 15671 [Source:MGI Symbol;Acc:MGI:3783113]	+	gene	overlapping	0	-0.504991	-0.254046	0.0177054	-0.529859
TCONS_00005378	1	68037703	68298440	-	Erbb4	ENSMUSG00000062209	v-erb-a erythroblastic leukemia viral oncogene homolog 4 (avian) [Source:MGI Symbol;Acc:MGI:104771]	-	gene	overlapping	0	-0.12099	0.991609	0.162025	1.92359
TCONS_00005381	1	69229905	69231096	-	null					Not found	0	-0.555659	-0.883703	-0.800964	-0.60586
TCONS_00005384	1	69358762	69363798	-	null					Not found	0	-0.555659	-0.883703	-0.800964	-0.60586
TCONS_00005386	1	69366458	69370794	-	null					Not found	0	-0.555659	-0.883703	-0.800964	-0.60586
TCONS_00005388	1	69373888	69406274	-	null					Not found	0	3.73983	3.57359	3.95786	4.01886
TCONS_00005392	1	69531214	69687371	-	Ikzf2	ENSMUSG00000025997	IKAROS family zinc finger 2 [Source:MGI Symbol;Acc:MGI:1342541]	-	gene	overlapping	0	-0.504991	-0.499701	-0.800964	-0.60586
TCONS_00005393	1	69732929	69738112	-	null					Not found	0	-0.555659	-0.883703	-0.800964	-0.60586
TCONS_00005394	1	69741226	69743314	-	null					Not found	0	-0.555659	-0.883703	-0.800964	-0.60586
TCONS_00001353	1	69742348	69746506	+	null					Not found	0	-0.555659	-0.833035	-0.800964	-0.60586
TCONS_00001355	1	69750109	69811616	+	null					Not found	0	-0.555659	-0.254046	-0.750297	-0.529859
TCONS_00001361	1	69826988	70732202	+	Spag16	ENSMUSG00000053153	sperm associated antigen 16 [Source:MGI Symbol;Acc:MGI:1913972]	+	gene	overlapping	0	4.03027	4.57185	4.39408	4.61078
ENSMUST00000116874	1	69955004	69955129	-	Spag16	ENSMUSG00000053153	sperm associated antigen 16 [Source:MGI Symbol;Acc:MGI:1913972]	+	gene	overlapping	0	-0.555659	-0.883703	-0.800964	-0.60586
TCONS_00005397	1	70401819	70406341	-	Spag16	ENSMUSG00000053153	sperm associated antigen 16 [Source:MGI Symbol;Acc:MGI:1913972]	+	gene	overlapping	0	-0.504991	-0.833035	-0.750297	-0.529859
CUFF.1328.1	1	70699938	70700605	-	Spag16	ENSMUSG00000053153	sperm associated antigen 16 [Source:MGI Symbol;Acc:MGI:1913972]	+	gene	overlapping	0	-0.555659	-0.883703	-0.800964	-0.60586
TCONS_00005398	1	70721548	70724845	-	Spag16	ENSMUSG00000053153	sperm associated antigen 16 [Source:MGI Symbol;Acc:MGI:1913972]	+	gene	overlapping	0	-0.504991	-0.833035	-0.800964	-0.60586
TCONS_00005413	1	70735373	70764685	-	Vwc2l	ENSMUSG00000045648	von Willebrand factor C domain-containing protein 2-like [Source:MGI Symbol;Acc:MGI:2444069]	+	gene	overlapping	0	-0.555659	-0.883703	-0.800964	-0.60586
TCONS_00005416	1	70766866	70771405	-	Vwc2l	ENSMUSG00000045648	von Willebrand factor C domain-containing protein 2-like [Source:MGI Symbol;Acc:MGI:2444069]	+	gene	overlapping	0	-0.555659	-0.883703	-0.800964	-0.60586
TCONS_00005422	1	70773743	70808947	-	Vwc2l	ENSMUSG00000045648	von Willebrand factor C domain-containing protein 2-like [Source:MGI Symbol;Acc:MGI:2444069]	+	gene	overlapping	0	4.72422	4.79238	4.36493	4.40327
TCONS_00005439	1	70809050	70809724	-	Vwc2l	ENSMUSG00000045648	von Willebrand factor C domain-containing protein 2-like [Source:MGI Symbol;Acc:MGI:2444069]	+	gene	overlapping	0	-0.555659	-0.883703	-0.800964	-0.60586
TCONS_00005441	1	71026635	71103146	-	Bard1	ENSMUSG00000026196	BRCA1 associated RING domain 1 [Source:MGI Symbol;Acc:MGI:1328361]	-	gene	overlapping	0	2.57128	3.13741	2.84832	3.40327
TCONS_00005446	1	71200650	71201673	-	null					Not found	0	-0.555659	-0.833035	-0.800964	-0.60586
TCONS_00005448	1	71242276	71272672	-	Abca12	ENSMUSG00000050296	ATP-binding cassette, sub-family A (ABC1), member 12 [Source:MGI Symbol;Acc:MGI:2676312]	-	gene	overlapping	0	5.4688	5.10017	4.62622	4.12355
TCONS_00005449	1	71293646	71301031	-	Abca12	ENSMUSG00000050296	ATP-binding cassette, sub-family A (ABC1), member 12 [Source:MGI Symbol;Acc:MGI:2676312]	-	gene	overlapping	0	-0.555659	-0.883703	-0.800964	-0.60586
TCONS_00005450	1	71302808	71303649	-	Abca12	ENSMUSG00000050296	ATP-binding cassette, sub-family A (ABC1), member 12 [Source:MGI Symbol;Acc:MGI:2676312]	-	gene	overlapping	0	-0.504991	-0.883703	-0.800964	-0.60586
TCONS_00001386	1	71556910	71579631	+	Atic	ENSMUSG00000026192	5-aminoimidazole-4-carboxamide ribonucleotide formyltransferase/IMP cyclohydrolase [Source:MGI Symbol;Acc:MGI:1351352]	+	gene	overlapping	0	5.20825	4.94542	5.2522	5.31572
TCONS_00005457	1	71585523	71653171	-	Fn1	ENSMUSG00000026193	fibronectin 1 [Source:MGI Symbol;Acc:MGI:95566]	-	gene	overlapping	0	4.41191	4.20153	4.43321	4.18537
TCONS_00001388	1	71746937	71759296	+	null					Not found	0	2.18131	2.50178	1.6768	1.63111
TCONS_00005460	1	71895200	72074654	-	Rpl21-ps1	ENSMUSG00000059483	ribosomal protein 21, pseudogene 1 [Source:MGI Symbol;Acc:MGI:3647596]	+	gene	overlapping	0	5.8955	5.39006	5.39896	5.09252
TCONS_00005472	1	72107123	72146922	-	null					Not found	0	1.89864	2.04228	2.04862	3.03478
TCONS_00005476	1	72159194	72212425	-	Mreg	ENSMUSG00000039395	melanoregulin [Source:MGI Symbol;Acc:MGI:2151839]	-	gene	overlapping	0	1.31965	2.76223	1.48181	2.67954
TCONS_00005477	1	72216260	72216569	-	null					Not found	0	-0.555659	-0.883703	-0.800964	-0.60586
TCONS_00001393	1	72217744	72218663	+	null					Not found	0	-0.555659	-0.883703	-0.800964	-0.60586
TCONS_00001394	1	72223569	72225037	+	AC120136.3	ENSMUSG00000094655	No description	+	gene	downstream	1203	-0.555659	-0.883703	-0.800964	-0.60586
TCONS_00005479	1	72224468	72225925	-	AC120136.3	ENSMUSG00000094655	No description	+	gene	downstream	315	-0.555659	-0.883703	-0.800964	-0.60586
TCONS_00001397	1	72236463	72274869	+	U2	ENSMUSG00000094050	U2 spliceosomal RNA [Source:RFAM;Acc:RF00004]	+	gene	overlapping	0	-0.555659	-0.833035	-0.800964	-0.60586
TCONS_00005480	1	72255254	72255926	-	AC120136.1	ENSMUSG00000093843	No description	+	gene	upstream	56	-0.555659	-0.883703	-0.800964	-0.60586
TCONS_00005481	1	72259172	72284344	-	Pecr	ENSMUSG00000026189	peroxisomal trans-2-enoyl-CoA reductase [Source:MGI Symbol;Acc:MGI:2148199]	-	gene	overlapping	0	8.05632	8.16808	8.34905	8.4471
TCONS_00001400	1	72284274	72303107	+	Pecr	ENSMUSG00000026189	peroxisomal trans-2-enoyl-CoA reductase [Source:MGI Symbol;Acc:MGI:2148199]	-	gene	overlapping	0	7.58488	7.75053	7.2155	7.53231
TCONS_00001403	1	72307342	72394952	+	Xrcc5	ENSMUSG00000026187	X-ray repair complementing defective repair in Chinese hamster cells 5 [Source:MGI Symbol;Acc:MGI:104517]	+	gene	overlapping	0	6.89971	6.73472	7.13738	6.53263
TCONS_00005485	1	72427112	72536930	-	2004-03-01	ENSMUSG00000039372	membrane-associated ring finger (C3HC4) 4 [Source:MGI Symbol;Acc:MGI:2683550]	-	gene	overlapping	0	3.64795	3.33363	3.95403	2.44982
TCONS_00005489	1	72564225	72564532	-	null					Not found	0	-0.555659	-0.883703	-0.800964	-0.60586
TCONS_00001406	1	72583138	72635728	+	Smarcal1	ENSMUSG00000039354	SWI/SNF related matrix associated, actin dependent regulator of chromatin, subfamily a-like 1 [Source:MGI Symbol;Acc:MGI:1859183]	+	gene	overlapping	0	7.9703	7.76071	7.80903	7.95115
TCONS_00001409	1	72641251	72713809	+	Ankar	ENSMUSG00000039342	ankyrin and armadillo repeat containing [Source:MGI Symbol;Acc:MGI:2442559]	-	gene	overlapping	0	2.9606	2.93025	3.15944	3.40327
TCONS_00005490	1	72710394	72711180	-	Rpl37a	ENSMUSG00000046330	ribosomal protein L37a [Source:MGI Symbol;Acc:MGI:98068]	+	gene	downstream	80	-0.555659	-0.883703	-0.800964	-0.60586
TCONS_00001411	1	72824503	72852474	+	Igfbp2	ENSMUSG00000039323	insulin-like growth factor binding protein 2 [Source:MGI Symbol;Acc:MGI:96437]	+	gene	overlapping	0	-0.555659	-0.883703	-0.800964	-0.60586
TCONS_00005493	1	72857932	72875072	-	Igfbp5	ENSMUSG00000026185	insulin-like growth factor binding protein 5 [Source:MGI Symbol;Acc:MGI:96440]	-	gene	overlapping	0	2.23795	3.4506	3.15417	4.36082
NOMERGE_TCONS_00000048	1	73015083	73015899	-	Tnp1	ENSMUSG00000026182	transition protein 1 [Source:MGI Symbol;Acc:MGI:98784]	-	gene	overlapping	0	-0.555659	-0.883703	-0.800964	-0.60586
TCONS_00001412	1	73156432	73157768	+	null					Not found	0	-0.504991	0.0792871	-0.366296	-0.60586
TCONS_00001413	1	73378774	73379559	+	null					Not found	0	-0.555659	-0.883703	-0.800964	-0.0298587
TCONS_00005494	1	73615647	73620426	-	null					Not found	0	0.407331	1.65828	0.300371	2.42359
TCONS_00005496	1	73662050	73673023	-	null					Not found	0	-0.555659	-0.499701	-0.800964	-0.60586
TCONS_00005497	1	73716665	73717858	-	null					Not found	0	-0.555659	-0.883703	-0.800964	-0.60586
TCONS_00005499	1	73750350	73841918	-	5S_rRNA	ENSMUSG00000088666	5S ribosomal RNA [Source:RFAM;Acc:RF00001]	+	gene	overlapping	0	-0.454323	0.870752	0.300371	0.838624
TCONS_00005503	1	73910231	74124447	-	Tns1	ENSMUSG00000055322	tensin 1 [Source:MGI Symbol;Acc:MGI:104552]	-	gene	overlapping	0	1.83443	1.21006	1.65334	2.42359
TCONS_00001414	1	74153994	74161371	+	Cxcr2	ENSMUSG00000026180	chemokine (C-X-C motif) receptor 2 [Source:MGI Symbol;Acc:MGI:105303]	+	gene	overlapping	0	-0.555659	-0.883703	-0.800964	-0.60586
TCONS_00005505	1	74182286	74182927	-	null					Not found	0	-0.555659	-0.883703	-0.800964	-0.60586
TCONS_00005506	1	74202087	74202649	-	null					Not found	0	-0.555659	-0.883703	-0.800964	-0.60586
TCONS_00001416	1	74236382	74268209	+	Arpc2	ENSMUSG00000006304	actin related protein 2/3 complex, subunit 2 [Source:MGI Symbol;Acc:MGI:1923959]	+	gene	overlapping	0	7.29272	7.34729	7.18378	7.28767
TCONS_00001420	1	74278550	74279682	+	Gpbar1	ENSMUSG00000064272	G protein-coupled bile acid receptor 1 [Source:MGI Symbol;Acc:MGI:2653863]	+	gene	overlapping	0	-0.555659	-0.883703	-0.800964	-0.60586
TCONS_00005507	1	74279839	74284912	-	Aamp	ENSMUSG00000006299	angio-associated migratory protein [Source:MGI Symbol;Acc:MGI:107809]	-	gene	overlapping	0	5.80063	5.82386	6.11526	6.25349
TCONS_00001421	1	74284930	74353694	+	Pnkd	ENSMUSG00000026179	paroxysmal nonkinesiogenic dyskinesia [Source:MGI Symbol;Acc:MGI:1930773]	+	gene	overlapping	0	3.13212	3.36112	3.25793	3.81959
TCONS_00005511	1	74288247	74305648	-	Pnkd	ENSMUSG00000026179	paroxysmal nonkinesiogenic dyskinesia [Source:MGI Symbol;Acc:MGI:1930773]	+	gene	overlapping	0	6.35848	6.36128	6.39334	6.21655
CUFF.1341.1	1	74306770	74307094	-	Pnkd	ENSMUSG00000026179	paroxysmal nonkinesiogenic dyskinesia [Source:MGI Symbol;Acc:MGI:1930773]	+	gene	overlapping	0	-0.555659	-0.883703	-0.800964	-0.60586
CUFF.1342.1	1	74314216	74314939	-	Pnkd	ENSMUSG00000026179	paroxysmal nonkinesiogenic dyskinesia [Source:MGI Symbol;Acc:MGI:1930773]	+	gene	overlapping	0	-0.555659	-0.883703	-0.800964	-0.60586
TCONS_00005512	1	74354627	74354930	-	Pnkd	ENSMUSG00000026179	paroxysmal nonkinesiogenic dyskinesia [Source:MGI Symbol;Acc:MGI:1930773]	+	gene	upstream	933	-0.555659	-0.883703	-0.800964	-0.60586
TCONS_00001428	1	74383341	74386062	+	Slc11a1	ENSMUSG00000026177	solute carrier family 11 (proton-coupled divalent metal ion transporters), member 1 [Source:MGI Symbol;Acc:MGI:1345275]	+	gene	overlapping	0	-0.555659	-0.883703	-0.800964	-0.60586
TCONS_00005513	1	74391103	74391487	-	Ctdsp1	ENSMUSG00000026176	CTD (carboxy-terminal domain, RNA polymerase II, polypeptide A) small phosphatase 1 [Source:MGI Symbol;Acc:MGI:2654470]	+	gene	downstream	22	-0.555659	-0.883703	-0.800964	-0.60586
TCONS_00001429	1	74391244	74397326	+	Ctdsp1	ENSMUSG00000026176	CTD (carboxy-terminal domain, RNA polymerase II, polypeptide A) small phosphatase 1 [Source:MGI Symbol;Acc:MGI:2654470]	+	gene	overlapping	0	4.41662	4.7204	3.88739	4.2423
TCONS_00001431	1	74409376	74435559	+	Vil1	ENSMUSG00000026175	villin 1 [Source:MGI Symbol;Acc:MGI:98930]	+	gene	overlapping	0	7.73082	7.24523	7.29042	6.9682
TCONS_00005514	1	74418113	74418991	-	Vil1	ENSMUSG00000026175	villin 1 [Source:MGI Symbol;Acc:MGI:98930]	+	gene	overlapping	0	-0.555659	-0.883703	-0.800964	-0.60586
TCONS_00005519	1	74435466	74544286	-	Vil1	ENSMUSG00000026175	villin 1 [Source:MGI Symbol;Acc:MGI:98930]	+	gene	overlapping	0	6.09611	6.29224	5.94979	6.0294
TCONS_00001436	1	74505957	74532755	+	Usp37	ENSMUSG00000033364	ubiquitin specific peptidase 37 [Source:MGI Symbol;Acc:MGI:2442483]	-	gene	overlapping	0	6.30182	6.19334	5.97265	5.8543
TCONS_00005527	1	74565127	74588263	-	Plcd4	ENSMUSG00000026173	phospholipase C, delta 4 [Source:MGI Symbol;Acc:MGI:107469]	+	gene	overlapping	0	6.47329	6.71304	6.29271	6.70024
TCONS_00005528	1	74589944	74601504	-	Bcs1l	ENSMUSG00000026172	BCS1-like (yeast) [Source:MGI Symbol;Acc:MGI:1914071]	+	gene	overlapping	0	7.50526	7.20171	6.76281	6.92593
TCONS_00001439	1	74601427	74636894	+	Stk36	ENSMUSG00000033276	serine/threonine kinase 36 (fused homolog, Drosophila) [Source:MGI Symbol;Acc:MGI:1920831]	+	gene	overlapping	0	8.24851	8.1378	8.0925	7.48105
TCONS_00005533	1	74660534	74661588	-	Ttll4	ENSMUSG00000033257	tubulin tyrosine ligase-like family, member 4 [Source:MGI Symbol;Acc:MGI:1914784]	+	gene	downstream	157	-0.555659	-0.883703	-0.800964	-0.60586
TCONS_00001447	1	74660570	74661320	+	Ttll4	ENSMUSG00000033257	tubulin tyrosine ligase-like family, member 4 [Source:MGI Symbol;Acc:MGI:1914784]	+	gene	downstream	425	0.0739974	-0.883703	-0.750297	-0.60586
TCONS_00001449	1	74661648	74703880	+	Ttll4	ENSMUSG00000033257	tubulin tyrosine ligase-like family, member 4 [Source:MGI Symbol;Acc:MGI:1914784]	+	gene	overlapping	0	7.62632	7.62417	7.55641	7.40808
TCONS_00001453	1	74713574	74737890	+	Cyp27a1	ENSMUSG00000026170	cytochrome P450, family 27, subfamily a, polypeptide 1 [Source:MGI Symbol;Acc:MGI:88594]	+	gene	overlapping	0	2.12467	2.50924	2.64576	3.05733
TCONS_00001455	1	74771892	74785319	+	Wnt6	ENSMUSG00000033227	wingless-related MMTV integration site 6 [Source:MGI Symbol;Acc:MGI:98960]	+	gene	overlapping	0	-0.555659	-0.883703	-0.800964	-0.60586
TCONS_00005534	1	74816586	74816821	-	null					Not found	0	-0.555659	-0.883703	-0.800964	-0.60586
TCONS_00005535	1	74819030	74819317	-	null					Not found	0	-0.555659	-0.883703	-0.800964	-0.60586
TCONS_00005536	1	74833227	74834392	-	null					Not found	0	-0.555659	-0.883703	-0.800964	-0.60586
TCONS_00001456	1	74835808	74837282	+	null					Not found	0	-0.555659	-0.883703	-0.800964	-0.60586
TCONS_00001457	1	74839274	74840504	+	null					Not found	0	-0.555659	-0.883703	-0.800964	-0.60586
TCONS_00001458	1	74854990	74857732	+	Gm16582	ENSMUSG00000089964	predicted gene 16582 [Source:MGI Symbol;Acc:MGI:4415002]	+	gene	overlapping	0	3.3873	5.60048	3.68425	6.52723
TCONS_00001459	1	74876590	74877394	+	Gm16582	ENSMUSG00000089964	predicted gene 16582 [Source:MGI Symbol;Acc:MGI:4415002]	+	gene	overlapping	0	-0.555659	-0.883703	-0.800964	-0.60586
TCONS_00005537	1	74890531	74892732	-	Cryba2	ENSMUSG00000006546	crystallin, beta A2 [Source:MGI Symbol;Acc:MGI:104336]	-	gene	overlapping	0	-0.555659	-0.883703	-0.800964	-0.60586
TCONS_00005538	1	74923392	74935592	-	Ccdc108	ENSMUSG00000047021	coiled-coil domain containing 108 [Source:MGI Symbol;Acc:MGI:2444274]	-	gene	overlapping	0	-0.555659	-0.883703	-0.800964	-0.60586
TCONS_00005540	1	74965637	75046645	-	Nhej1	ENSMUSG00000026162	nonhomologous end-joining factor 1 [Source:MGI Symbol;Acc:MGI:1922820]	-	gene	overlapping	0	5.26734	4.85794	5.34209	5.08321
TCONS_00001460	1	74982626	74986215	+	Nhej1	ENSMUSG00000026162	nonhomologous end-joining factor 1 [Source:MGI Symbol;Acc:MGI:1922820]	-	gene	overlapping	0	7.05079	6.77364	7.81856	7.89273
TCONS_00005550	1	75125544	75133890	-	Slc23a3	ENSMUSG00000026205	solute carrier family 23 (nucleobase transporters), member 3 [Source:MGI Symbol;Acc:MGI:104516]	-	gene	overlapping	0	1.89864	2.6819	1.26933	2.67011
TCONS_00005554	1	75135794	75142727	-	1810031K17Rik	ENSMUSG00000033159	RIKEN cDNA 1810031K17 gene [Source:MGI Symbol;Acc:MGI:1916421]	-	gene	overlapping	0	7.37428	7.22104	7.28746	7.69517
TCONS_00001461	1	75142248	75152679	+	1810031K17Rik	ENSMUSG00000033159	RIKEN cDNA 1810031K17 gene [Source:MGI Symbol;Acc:MGI:1916421]	-	gene	overlapping	0	3.35408	3.6507	3.44211	3.79207
TCONS_00001464	1	75168248	75171629	+	Zfand2b	ENSMUSG00000026197	zinc finger, AN1 type domain 2B [Source:MGI Symbol;Acc:MGI:1916068]	+	gene	overlapping	0	6.14777	5.94455	5.57297	5.73543
TCONS_00005555	1	75171640	75180438	-	Abcb6	ENSMUSG00000026198	ATP-binding cassette, sub-family B (MDR/TAP), member 6 [Source:MGI Symbol;Acc:MGI:1921354]	-	gene	overlapping	0	5.55899	5.81849	5.23663	5.71649
TCONS_00005559	1	75180858	75192232	-	Atg9a	ENSMUSG00000033124	autophagy-related 9A (yeast) [Source:MGI Symbol;Acc:MGI:2138446]	-	gene	overlapping	0	5.39472	5.31653	4.89951	5.29482
TCONS_00001466	1	75192050	75199387	+	Ankzf1	ENSMUSG00000026199	ankyrin repeat and zinc finger domain containing 1 [Source:MGI Symbol;Acc:MGI:1098746]	+	gene	overlapping	0	4.08376	4.31354	3.74847	4.21829
TCONS_00005560	1	75198243	75210778	-	Ankzf1	ENSMUSG00000026199	ankyrin repeat and zinc finger domain containing 1 [Source:MGI Symbol;Acc:MGI:1098746]	+	gene	overlapping	0	-0.555659	-0.883703	-0.800964	-0.60586
NOMERGE_TCONS_00000016	1	75210838	75215606	+	Stk16	ENSMUSG00000026201	serine/threonine kinase 16 [Source:MGI Symbol;Acc:MGI:1313271]	+	gene	overlapping	0	0.898641	-0.499701	-0.416963	0.546143
TCONS_00005562	1	75214974	75219329	-	Stk16	ENSMUSG00000026201	serine/threonine kinase 16 [Source:MGI Symbol;Acc:MGI:1313271]	+	gene	overlapping	0	7.05038	7.17787	7.09373	7.61486
TCONS_00001473	1	75219387	75221211	+	AC166150.1	ENSMUSG00000096094	uncharacterized protein LOC381272 isoform 2 [Source:RefSeq peptide;Acc:NP_001230020]	-	gene	overlapping	0	-0.555659	-0.883703	-0.800964	-0.60586
TCONS_00005563	1	75219429	75223654	-	AC166150.1	ENSMUSG00000096094	uncharacterized protein LOC381272 isoform 2 [Source:RefSeq peptide;Acc:NP_001230020]	-	gene	overlapping	0	-0.555659	-0.883703	-0.800964	-0.60586
TCONS_00005564	1	75233781	75234392	-	AC166150.1	ENSMUSG00000096094	uncharacterized protein LOC381272 isoform 2 [Source:RefSeq peptide;Acc:NP_001230020]	-	gene	downstream	1688	-0.555659	-0.883703	-0.800964	-0.60586
TCONS_00001475	1	75236405	75245692	+	Dnajb2	ENSMUSG00000026203	DnaJ (Hsp40) homolog, subfamily B, member 2 [Source:MGI Symbol;Acc:MGI:1928739]	+	gene	overlapping	0	4.72926	3.36401	4.30908	3.44982
TCONS_00005565	1	75247053	75252536	-	Ptprn	ENSMUSG00000026204	protein tyrosine phosphatase, receptor type, N [Source:MGI Symbol;Acc:MGI:102765]	-	gene	overlapping	0	-0.555659	-0.833035	-0.800964	-0.60586
TCONS_00001480	1	75271760	75276269	+	Resp18	ENSMUSG00000033061	regulated endocrine-specific protein 18 [Source:MGI Symbol;Acc:MGI:1098222]	-	gene	overlapping	0	-0.555659	-0.883703	-0.800964	-0.60586
TCONS_00005566	1	75272199	75278415	-	Resp18	ENSMUSG00000033061	regulated endocrine-specific protein 18 [Source:MGI Symbol;Acc:MGI:1098222]	-	gene	overlapping	0	-0.555659	-0.883703	-0.800964	-0.60586
TCONS_00001483	1	75279798	75280333	+	Resp18	ENSMUSG00000033061	regulated endocrine-specific protein 18 [Source:MGI Symbol;Acc:MGI:1098222]	-	gene	downstream	1383	-0.555659	-0.883703	-0.800964	-0.60586
TCONS_00001484	1	75284587	75285502	+	null					Not found	0	-0.555659	-0.883703	-0.800964	-0.60586
TCONS_00001485	1	75289224	75290200	+	null					Not found	0	-0.555659	-0.883703	-0.800964	-0.60586
TCONS_00001486	1	75292970	75302357	+	null					Not found	0	-0.504991	-0.883703	-0.0836299	-0.60586
TCONS_00005569	1	75307894	75317637	-	Dnpep	ENSMUSG00000026209	aspartyl aminopeptidase [Source:MGI Symbol;Acc:MGI:1278328]	-	gene	overlapping	0	-0.504991	-0.499701	0.87936	0.838624
TCONS_00001490	1	75310053	75322608	+	Dnpep	ENSMUSG00000026209	aspartyl aminopeptidase [Source:MGI Symbol;Acc:MGI:1278328]	-	gene	overlapping	0	-0.504991	0.658276	0.546026	-0.453857
TCONS_00001495	1	75362030	75363638	+	Des	ENSMUSG00000026208	desmin [Source:MGI Symbol;Acc:MGI:94885]	+	gene	overlapping	0	-0.171658	-0.883703	-0.800964	-0.60586
TCONS_00001496	1	75382138	75387895	+	Speg	ENSMUSG00000026207	SPEG complex locus [Source:MGI Symbol;Acc:MGI:109282]	+	gene	overlapping	0	-0.555659	-0.883703	-0.800964	-0.60586
TCONS_00001498	1	75399971	75404562	+	Speg	ENSMUSG00000026207	SPEG complex locus [Source:MGI Symbol;Acc:MGI:109282]	+	gene	overlapping	0	-0.504991	-0.833035	-0.800964	1.54614
TCONS_00001500	1	75412436	75412695	+	Speg	ENSMUSG00000026207	SPEG complex locus [Source:MGI Symbol;Acc:MGI:109282]	+	gene	overlapping	0	-0.555659	-0.883703	-0.800964	-0.60586
TCONS_00001501	1	75435214	75435400	+	Gmppa	ENSMUSG00000033021	GDP-mannose pyrophosphorylase A [Source:MGI Symbol;Acc:MGI:1916330]	+	gene	downstream	530	-0.555659	-0.883703	-0.800964	-0.60586
TCONS_00001504	1	75435930	75443179	+	Gmppa	ENSMUSG00000033021	GDP-mannose pyrophosphorylase A [Source:MGI Symbol;Acc:MGI:1916330]	+	gene	overlapping	0	1.84797	2.34457	0.986669	2.98133
TCONS_00001505	1	75448856	75450889	+	Accn4	ENSMUSG00000033007	amiloride-sensitive cation channel 4, pituitary [Source:MGI Symbol;Acc:MGI:2652846]	+	gene	overlapping	0	-0.555659	-0.883703	-0.800964	-0.60586
TCONS_00001507	1	75451024	75474343	+	Accn4	ENSMUSG00000033007	amiloride-sensitive cation channel 4, pituitary [Source:MGI Symbol;Acc:MGI:2652846]	+	gene	overlapping	0	-0.555659	-0.833035	-0.800964	-0.60586
TCONS_00005571	1	75474569	75479471	-	Chpf	ENSMUSG00000032997	chondroitin polymerizing factor [Source:MGI Symbol;Acc:MGI:106576]	-	gene	overlapping	0	3.48063	3.83605	3.18911	3.84981
TCONS_00001510	1	75479470	75485705	+	Chpf	ENSMUSG00000032997	chondroitin polymerizing factor [Source:MGI Symbol;Acc:MGI:106576]	-	gene	overlapping	0	-0.504991	-0.254046	-0.750297	-0.0298587
TCONS_00005572	1	75486668	75488056	-	Obsl1	ENSMUSG00000026211	obscurin-like 1 [Source:MGI Symbol;Acc:MGI:2138628]	-	gene	overlapping	0	-0.555659	-0.883703	-0.800964	-0.529859
TCONS_00005573	1	75490822	75506456	-	Obsl1	ENSMUSG00000026211	obscurin-like 1 [Source:MGI Symbol;Acc:MGI:2138628]	-	gene	overlapping	0	0.212343	0.501781	-0.416963	1.54614
TCONS_00001511	1	75507077	75510366	+	Inha	ENSMUSG00000032968	inhibin alpha [Source:MGI Symbol;Acc:MGI:96569]	+	gene	overlapping	0	2.79879	1.91385	0.407681	3.20711
TCONS_00001512	1	75521523	75537335	+	Stk11ip	ENSMUSG00000026213	serine/threonine kinase 11 interacting protein [Source:MGI Symbol;Acc:MGI:1918978]	+	gene	overlapping	0	1.56531	1.37561	1.23232	2.04614
TCONS_00001514	1	75546644	75562172	+	Slc4a3	ENSMUSG00000006576	solute carrier family 4 (anion exchanger), member 3 [Source:MGI Symbol;Acc:MGI:109350]	+	gene	overlapping	0	-0.504991	-0.449034	-0.800964	-0.529859
TCONS_00005575	1	75586160	75588272	-	null					Not found	0	-0.555659	-0.883703	-0.800964	-0.60586
TCONS_00001515	1	75588407	75605497	+	null					Not found	0	-0.555659	-0.883703	-0.800964	-0.60586
TCONS_00001517	1	75642791	75642996	+	null					Not found	0	-0.555659	-0.883703	-0.800964	-0.60586
TCONS_00005577	1	75659971	75663251	-	null					Not found	0	-0.555659	-0.883703	-0.800964	-0.60586
TCONS_00001518	1	75660934	75661718	+	null					Not found	0	-0.555659	-0.883703	-0.800964	-0.60586
TCONS_00001519	1	75675158	75996284	+	null					Not found	0	1.39378	1.46329	2.25579	0.338624
CUFF.1405.1	1	75968036	75968781	-	null					Not found	0	-0.555659	-0.833035	-0.800964	-0.0298587
TCONS_00001530	1	75996735	75999040	+	null					Not found	0	-0.555659	-0.883703	-0.800964	-0.60586
TCONS_00005578	1	76075223	76078447	-	null					Not found	0	0.0233297	-0.883703	-0.800964	0.0461428
TCONS_00001533	1	76161747	76219338	+	null					Not found	0	-0.504991	-0.883703	-0.699629	-0.60586
TCONS_00001534	1	76487504	76487873	+	null					Not found	0	-0.555659	-0.883703	-0.800964	-0.60586
TCONS_00001536	1	76489019	76503516	+	null					Not found	0	6.49791	7.00967	6.57096	7.05287
TCONS_00005579	1	76500342	76502104	-	null					Not found	0	-0.555659	-0.883703	-0.366296	-0.60586
TCONS_00005580	1	76580371	76580909	-	null					Not found	0	-0.555659	-0.883703	-0.800964	-0.60586
TCONS_00001540	1	76633053	76634542	+	null					Not found	0	-0.555659	-0.883703	-0.800964	-0.60586
TCONS_00001541	1	76637299	76639594	+	null					Not found	0	0.0233296	-0.883703	-0.750297	-0.60586
TCONS_00005583	1	76694028	76695212	-	null					Not found	0	-0.555659	-0.883703	-0.800964	-0.60586
TCONS_00001545	1	76845186	76847827	+	null					Not found	0	-0.454323	-0.499701	-0.800964	-0.60586
TCONS_00001546	1	77096131	77097996	+	null					Not found	0	-0.555659	-0.883703	-0.800964	-0.60586
TCONS_00005586	1	77366985	77515088	-	Epha4	ENSMUSG00000026235	Eph receptor A4 [Source:MGI Symbol;Acc:MGI:98277]	-	gene	overlapping	0	6.55297	7.10418	6.5516	6.73583
TCONS_00001547	1	77385576	77393423	+	Epha4	ENSMUSG00000026235	Eph receptor A4 [Source:MGI Symbol;Acc:MGI:98277]	-	gene	overlapping	0	-0.555659	-0.883703	-0.800964	-0.60586
CUFF.1425.1	1	77497152	77498307	+	Epha4	ENSMUSG00000026235	Eph receptor A4 [Source:MGI Symbol;Acc:MGI:98277]	-	gene	overlapping	0	0.407331	2.09892	-0.366296	4.81959
TCONS_00001548	1	77555957	77557020	+	null					Not found	0	-0.555659	-0.883703	-0.800964	-0.60586
TCONS_00005591	1	77940777	77972445	-	null					Not found	0	3.15909	3.50938	2.39413	2.86082
TCONS_00001550	1	77972628	77976978	+	null					Not found	0	3.58877	3.31439	3.30783	3.38236
TCONS_00001552	1	78006644	78007669	+	null					Not found	0	-0.555659	-0.883703	-0.800964	-0.60586
TCONS_00005598	1	78027537	78072317	-	null					Not found	0	3.01861	2.7709	4.03996	3.60041
TCONS_00005599	1	78101267	78196838	-	Pax3	ENSMUSG00000004872	paired box gene 3 [Source:MGI Symbol;Acc:MGI:97487]	-	gene	overlapping	0	0.652986	-0.254046	0.357013	0.0461428
TCONS_00005601	1	78214770	78219024	-	null					Not found	0	4.24677	4.64386	4.05093	4.90327
TCONS_00001553	1	78217465	78222203	+	null					Not found	0	-0.555659	-0.203379	-0.315628	0.470141
TCONS_00005602	1	78292185	78294074	-	null					Not found	0	-0.555659	-0.883703	-0.800964	-0.60586
TCONS_00001554	1	78292545	78293886	+	null					Not found	0	-0.555659	-0.883703	-0.800964	-0.60586
TCONS_00001555	1	78297172	78298153	+	null					Not found	0	-0.555659	-0.883703	-0.800964	-0.60586
TCONS_00005603	1	78298355	78299259	-	null					Not found	0	-0.555659	-0.883703	-0.800964	-0.60586
TCONS_00001557	1	78303713	78304946	+	null					Not found	0	-0.555659	-0.883703	-0.800964	-0.60586
NOMERGE_TCONS_00000020	1	78310346	78420286	+	Sgpp2	ENSMUSG00000032908	sphingosine-1-phosphate phosphotase 2 [Source:MGI Symbol;Acc:MGI:3589109]	+	gene	overlapping	0	1.9221	0.870752	1.95349	1.04614
TCONS_00005604	1	78354057	78354598	-	Sgpp2	ENSMUSG00000032908	sphingosine-1-phosphate phosphotase 2 [Source:MGI Symbol;Acc:MGI:3589109]	+	gene	overlapping	0	-0.555659	-0.883703	-0.800964	-0.60586
TCONS_00005606	1	78366845	78370540	-	Sgpp2	ENSMUSG00000032908	sphingosine-1-phosphate phosphotase 2 [Source:MGI Symbol;Acc:MGI:3589109]	+	gene	overlapping	0	-0.555659	-0.833035	-0.800964	-0.60586
TCONS_00005607	1	78417958	78488861	-	Sgpp2	ENSMUSG00000032908	sphingosine-1-phosphate phosphotase 2 [Source:MGI Symbol;Acc:MGI:3589109]	+	gene	overlapping	0	6.63942	6.49852	6.1592	6.3627
TCONS_00001558	1	78489205	78489737	+	Farsb	ENSMUSG00000026245	phenylalanyl-tRNA synthetase, beta subunit [Source:MGI Symbol;Acc:MGI:1346035]	-	gene	downstream	346	-0.555659	-0.883703	-0.800964	-0.60586
TCONS_00001559	1	78511867	78538173	+	BC035947	ENSMUSG00000090486	cDNA sequence BC035947 [Source:MGI Symbol;Acc:MGI:2652858]	-	gene	overlapping	0	-0.555659	-0.883703	-0.800964	-0.60586
TCONS_00001561	1	78615468	78621466	+	null					Not found	0	-0.555659	-0.883703	-0.800964	-0.60586
TCONS_00001564	1	78657825	78706987	+	Acsl3	ENSMUSG00000032883	acyl-CoA synthetase long-chain family member 3 [Source:MGI Symbol;Acc:MGI:1921455]	+	gene	overlapping	0	7.57673	7.69719	7.48102	7.69744
TCONS_00005613	1	78706955	78707508	-	Acsl3	ENSMUSG00000032883	acyl-CoA synthetase long-chain family member 3 [Source:MGI Symbol;Acc:MGI:1921455]	+	gene	overlapping	0	-0.555659	-0.883703	-0.800964	-0.60586
TCONS_00005617	1	78967637	78968079	-	Gm5830	ENSMUSG00000072978	predicted pseudogene 5830 [Source:MGI Symbol;Acc:MGI:3647375]	-	gene	overlapping	0	-0.555659	-0.883703	-0.800964	-0.60586
TCONS_00005619	1	79232274	79234010	-	null					Not found	0	-0.555659	-0.883703	-0.800964	-0.60586
TCONS_00005620	1	79287700	79289008	-	null					Not found	0	-0.555659	-0.883703	-0.800964	-0.60586
TCONS_00005621	1	79305486	79341380	-	null					Not found	0	2.09363	3.16087	3.25579	4.51446
TCONS_00005630	1	79434669	79451011	-	Scg2	ENSMUSG00000050711	secretogranin II [Source:MGI Symbol;Acc:MGI:103033]	-	gene	overlapping	0	0.847973	0.41262	0.357013	2.11078
TCONS_00005631	1	79506532	79508315	-	null					Not found	0	-0.555659	-0.883703	-0.800964	-0.60586
TCONS_00001574	1	79546219	79550177	+	null					Not found	0	1.83443	2.04825	2.14848	2.42359
TCONS_00001575	1	79556093	79565501	+	null					Not found	0	-0.504991	-0.883703	-0.800964	-0.60586
TCONS_00001578	1	79570987	79578876	+	null					Not found	0	1.86546	1.65828	2.81514	3.2423
TCONS_00001579	1	79584740	79585079	+	null					Not found	0	-0.555659	-0.883703	-0.800964	-0.60586
TCONS_00005639	1	79606876	79672187	-	Ap1s3	ENSMUSG00000054702	adaptor-related protein complex AP-1, sigma 3 [Source:MGI Symbol;Acc:MGI:1891304]	-	gene	overlapping	0	0.407331	-0.1157	0.40768	-0.529859
TCONS_00005645	1	79702262	79776143	-	Wdfy1	ENSMUSG00000073643	WD repeat and FYVE domain containing 1 [Source:MGI Symbol;Acc:MGI:1916618]	-	gene	overlapping	0	0.457998	0.853263	-0.12064	1.54614
TCONS_00001580	1	79776018	79781448	+	Wdfy1	ENSMUSG00000073643	WD repeat and FYVE domain containing 1 [Source:MGI Symbol;Acc:MGI:1916618]	-	gene	overlapping	0	4.05269	4.26239	3.40935	3.83107
TCONS_00001581	1	79787741	79788034	+	null					Not found	0	-0.555659	-0.883703	-0.800964	-0.60586
TCONS_00005650	1	79794197	79862103	-	Serpine2	ENSMUSG00000026249	serine (or cysteine) peptidase inhibitor, clade E, member 2 [Source:MGI Symbol;Acc:MGI:101780]	-	gene	overlapping	0	7.77429	7.59232	7.49394	7.92812
TCONS_00005653	1	79950834	79960091	-	null					Not found	0	-0.171658	0.991609	-0.221976	0.631105
TCONS_00001585	1	79959085	80001226	+	null					Not found	0	1.26301	3.08674	2.25579	4.00408
TCONS_00005656	1	79999495	80000205	-	null					Not found	0	-0.555659	-0.883703	-0.800964	-0.60586
TCONS_00005658	1	80034071	80038075	-	null					Not found	0	-0.555659	-0.833035	-0.699629	-0.529859
TCONS_00005661	1	80059545	80168329	-	AC083817.1	ENSMUSG00000096297	No description	+	gene	overlapping	0	3.35892	3.85959	3.9353	3.48133
TCONS_00005670	1	80170139	80174247	-	null					Not found	0	-0.12099	-0.449034	0.111358	-0.60586
TCONS_00001594	1	80173939	80176138	+	null					Not found	0	-0.555659	-0.883703	-0.800964	-0.60586
TCONS_00001597	1	80178979	80179774	+	null					Not found	0	-0.555659	-0.883703	-0.800964	-0.60586
TCONS_00005671	1	80183108	80184867	-	null					Not found	0	-0.555659	-0.883703	-0.800964	-0.60586
TCONS_00001599	1	80184124	80229572	+	Fam124b	ENSMUSG00000043230	family with sequence similarity 124, member B [Source:MGI Symbol;Acc:MGI:3026880]	-	gene	overlapping	0	4.56343	4.68677	4.89832	5.06663
TCONS_00005675	1	80198706	80218508	-	Fam124b	ENSMUSG00000043230	family with sequence similarity 124, member B [Source:MGI Symbol;Acc:MGI:3026880]	-	gene	overlapping	0	3.58494	2.5706	2.61149	1.7423
TCONS_00001608	1	80247842	80248973	+	null					Not found	0	-0.555659	-0.833035	-0.800964	-0.60586
TCONS_00005678	1	80264923	80340806	-	Cul3	ENSMUSG00000004364	cullin 3 [Source:MGI Symbol;Acc:MGI:1347360]	-	gene	overlapping	0	7.42	7.6144	7.74549	7.96662
TCONS_00001609	1	80340566	80340739	+	Cul3	ENSMUSG00000004364	cullin 3 [Source:MGI Symbol;Acc:MGI:1347360]	-	gene	downstream	86	-0.555659	-0.883703	-0.800964	-0.60586
TCONS_00005684	1	80501073	80758553	-	Dock10	ENSMUSG00000038608	dedicator of cytokinesis 10 [Source:MGI Symbol;Acc:MGI:2146320]	-	gene	overlapping	0	3.84427	3.45188	3.4176	3.36082
TCONS_00001612	1	81077317	81341764	+	9430031J16Rik	ENSMUSG00000054976	RIKEN cDNA 9430031J16 gene [Source:MGI Symbol;Acc:MGI:2443135]	+	gene	overlapping	0	3.09028	3.0347	3.69183	4.51446
TCONS_00005691	1	81644028	81650360	-	null					Not found	0	-0.555659	-0.883703	-0.800964	-0.60586
TCONS_00005692	1	81692618	81693970	-	null					Not found	0	0.0233296	0.129955	-0.315628	-0.60586
TCONS_00005693	1	81741985	81742969	-	null					Not found	0	-0.555659	-0.883703	-0.800964	-0.60586
TCONS_00001622	1	81982753	81983205	+	null					Not found	0	-0.555659	-0.883703	-0.800964	-0.60586
TCONS_00005695	1	82236394	82289390	-	Irs1	ENSMUSG00000055980	insulin receptor substrate 1 [Source:MGI Symbol;Acc:MGI:99454]	-	gene	overlapping	0	-0.555659	-0.833035	-0.750297	-0.60586
TCONS_00001626	1	82316308	82445366	+	Rhbdd1	ENSMUSG00000026142	rhomboid domain containing 1 [Source:MGI Symbol;Acc:MGI:1924117]	+	gene	overlapping	0	4.56919	4.51236	4.90161	4.71384
TCONS_00005696	1	82390041	82416074	-	Rhbdd1	ENSMUSG00000026142	rhomboid domain containing 1 [Source:MGI Symbol;Acc:MGI:1924117]	+	gene	overlapping	0	4.09853	4.94552	3.49278	5.88698
TCONS_00005705	1	82452558	82586849	-	Col4a4	ENSMUSG00000067158	collagen, type IV, alpha 4 [Source:MGI Symbol;Acc:MGI:104687]	-	gene	overlapping	0	-0.555659	-0.883703	-0.800964	-0.60586
TCONS_00001630	1	82586976	82722059	+	Col4a3	ENSMUSG00000079465	collagen, type IV, alpha 3 [Source:MGI Symbol;Acc:MGI:104688]	+	gene	overlapping	0	2.86546	2.89636	2.61149	2.36807
TCONS_00005707	1	82596863	82607809	-	Col4a3	ENSMUSG00000079465	collagen, type IV, alpha 3 [Source:MGI Symbol;Acc:MGI:104688]	+	gene	overlapping	0	-0.504991	-0.883703	-0.800964	-0.529859
TCONS_00005709	1	82661648	82689727	-	Col4a3	ENSMUSG00000079465	collagen, type IV, alpha 3 [Source:MGI Symbol;Acc:MGI:104688]	+	gene	overlapping	0	-0.504991	-0.883703	-0.800964	-0.0298587
TCONS_00001638	1	82724890	82752390	+	Mff	ENSMUSG00000026150	mitochondrial fission factor [Source:MGI Symbol;Acc:MGI:1922984]	+	gene	overlapping	0	7.79505	7.8451	7.48684	7.67201
TCONS_00005710	1	82823201	82823333	-	null					Not found	0	-0.555659	-0.883703	-0.800964	-0.60586
TCONS_00001643	1	82839344	82900996	+	AC138214.1	ENSMUSG00000093782	No description	+	gene	overlapping	0	6.16139	6.08667	6.23476	6.29432
TCONS_00005711	1	82896302	82896617	-	Agfg1	ENSMUSG00000026159	ArfGAP with FG repeats 1 [Source:MGI Symbol;Acc:MGI:1333754]	+	gene	upstream	27	-0.555659	-0.883703	-0.800964	-0.60586
TCONS_00001646	1	83008599	83008954	+	null					Not found	0	-0.555659	-0.883703	-0.800964	-0.60586
TCONS_00005716	1	83012523	83038448	-	Slc19a3	ENSMUSG00000038496	solute carrier family 19, member 3 [Source:MGI Symbol;Acc:MGI:1931307]	-	gene	overlapping	0	0.740664	1.2683	-0.0329623	2.67954
TCONS_00005717	1	83147137	83147161	-	null					Not found	0	-0.555659	-0.883703	-0.800964	-0.60586
TCONS_00001647	1	83196904	83210574	+	Wdr69	ENSMUSG00000053161	WD repeat domain 69 [Source:MGI Symbol;Acc:MGI:1923089]	+	gene	overlapping	0	3.11995	2.84541	2.70909	4.34981
TCONS_00005718	1	83211753	83223059	-	n-R5s214	ENSMUSG00000084443	nuclear encoded rRNA 5S 214 [Source:MGI Symbol;Acc:MGI:4422079]	-	gene	overlapping	0	-0.555659	-0.883703	-0.800964	1.49959
TCONS_00001650	1	83314513	83315298	+	Sphkap	ENSMUSG00000026163	SPHK1 interactor, AKAP domain containing [Source:MGI Symbol;Acc:MGI:1924879]	-	gene	overlapping	0	-0.555659	-0.883703	-0.800964	-0.60586
TCONS_00001653	1	83730377	83730587	+	null					Not found	0	-0.555659	-0.883703	-0.800964	-0.60586
TCONS_00001655	1	83733490	83735020	+	null					Not found	0	-0.555659	-0.883703	-0.800964	-0.60586
TCONS_00001657	1	83795789	83796087	+	AC158909.1	ENSMUSG00000094946	No description	+	gene	overlapping	0	-0.555659	-0.883703	-0.800964	-0.60586
TCONS_00001658	1	83802491	83803599	+	null					Not found	0	-0.555659	-0.883703	-0.800964	-0.60586
TCONS_00001659	1	83875159	83878109	+	null					Not found	0	-0.555659	-0.883703	-0.800964	-0.60586
TCONS_00001660	1	83890110	83901060	+	null					Not found	0	-0.555659	-0.883703	-0.800964	-0.60586
TCONS_00005726	1	84036294	84364379	-	Pid1	ENSMUSG00000045658	phosphotyrosine interaction domain containing 1 [Source:MGI Symbol;Acc:MGI:2138391]	-	gene	overlapping	0	4.9606	5.42485	4.68886	5.40455
TCONS_00001662	1	84364238	84388552	+	Dner	ENSMUSG00000036766	delta/notch-like EGF-related receptor [Source:MGI Symbol;Acc:MGI:2152889]	-	gene	overlapping	0	3.61793	3.22251	3.14344	3.2423
TCONS_00005735	1	84369839	84696221	-	Dner	ENSMUSG00000036766	delta/notch-like EGF-related receptor [Source:MGI Symbol;Acc:MGI:2152889]	-	gene	overlapping	0	-0.171658	-0.883703	-0.12064	2.44982
CUFF.1525.1	1	84513369	84514191	+	Dner	ENSMUSG00000036766	delta/notch-like EGF-related receptor [Source:MGI Symbol;Acc:MGI:2152889]	-	gene	overlapping	0	-0.555659	-0.883703	-0.800964	-0.60586
CUFF.1529.1	1	84689088	84689826	+	Dner	ENSMUSG00000036766	delta/notch-like EGF-related receptor [Source:MGI Symbol;Acc:MGI:2152889]	-	gene	overlapping	0	-0.555659	-0.883703	-0.800964	-0.60586
TCONS_00001670	1	84710708	84711408	+	null					Not found	0	-0.555659	-0.883703	-0.800964	-0.60586
TCONS_00005746	1	84721189	84873996	-	Trip12	ENSMUSG00000026219	thyroid hormone receptor interactor 12 [Source:MGI Symbol;Acc:MGI:1309481]	-	gene	overlapping	0	10.7635	10.7813	10.9831	10.8072
TCONS_00001671	1	84839841	84900598	+	Fbxo36	ENSMUSG00000073633	F-box protein 36 [Source:MGI Symbol;Acc:MGI:1289192]	+	gene	overlapping	0	3.66859	3.50638	3.64283	3.25507
TCONS_00001683	1	84908254	84908505	+	Slc16a14	ENSMUSG00000026220	solute carrier family 16 (monocarboxylic acid transporters), member 14 [Source:MGI Symbol;Acc:MGI:1919031]	-	gene	overlapping	0	-0.555659	-0.883703	-0.800964	-0.60586
TCONS_00001684	1	84961784	84965813	+	null					Not found	0	-0.555659	-0.883703	-0.800964	-0.60586
TCONS_00005754	1	84985578	85346062	-	C130026I21Rik	ENSMUSG00000052477	RIKEN cDNA C130026I21 gene [Source:MGI Symbol;Acc:MGI:3612702]	-	gene	overlapping	0	4.74675	5.41719	4.80547	5.69589
CUFF.7069.1	1	85040517	85040855	+	C130026I21Rik	ENSMUSG00000052477	RIKEN cDNA C130026I21 gene [Source:MGI Symbol;Acc:MGI:3612702]	-	gene	overlapping	0	-0.555659	-0.883703	-0.800964	-0.60586
ENSMUST00000160487	1	85061154	85062642	+	C130026I21Rik	ENSMUSG00000052477	RIKEN cDNA C130026I21 gene [Source:MGI Symbol;Acc:MGI:3612702]	-	gene	overlapping	0	-0.555659	-0.883703	-0.800964	-0.60586
TCONS_00001689	1	85096063	85264507	+	C130026I21Rik	ENSMUSG00000052477	RIKEN cDNA C130026I21 gene [Source:MGI Symbol;Acc:MGI:3612702]	-	gene	overlapping	0	6.57188	6.74527	6.05658	6.54517
TCONS_00001711	1	85271816	85289706	+	C130026I21Rik	ENSMUSG00000052477	RIKEN cDNA C130026I21 gene [Source:MGI Symbol;Acc:MGI:3612702]	-	gene	downstream	1250	5.54589	5.94477	5.49627	5.96996
TCONS_00001716	1	85326729	85342615	+	Gm16025	ENSMUSG00000089652	predicted gene 16025 [Source:MGI Symbol;Acc:MGI:3802144]	+	gene	overlapping	0	-0.555659	-0.833035	-0.800964	-0.60586
TCONS_00001717	1	85447109	85448888	+	null					Not found	0	-0.555659	-0.883703	-0.800964	-0.60586
TCONS_00005787	1	85483080	85485142	-	null					Not found	0	-0.555659	-0.883703	-0.800964	-0.60586
TCONS_00001726	1	85485527	85645037	+	Gm16092	ENSMUSG00000089714	predicted gene 16092 [Source:MGI Symbol;Acc:MGI:3841241]	-	gene	overlapping	0	2.1988	3.65261	2.32992	3.7423
CUFF.7108.1	1	85499081	85499924	-	null					Not found	0	-0.555659	-0.883703	-0.800964	-0.60586
TCONS_00005789	1	85511133	85527161	-	Gm16092	ENSMUSG00000089714	predicted gene 16092 [Source:MGI Symbol;Acc:MGI:3841241]	-	gene	overlapping	0	-0.555659	-0.883703	-0.800964	-0.60586
TCONS_00005790	1	85570323	85603878	-	AC147806.1	ENSMUSG00000094127	No description	+	gene	overlapping	0	8.63694	8.59709	8.65255	8.80112
CUFF.7127.1	1	85604498	85606611	-	Sp140	ENSMUSG00000070031	Sp140 nuclear body protein [Source:MGI Symbol;Acc:MGI:3702467]	+	gene	overlapping	0	-0.555659	-0.833035	-0.800964	-0.60586
TCONS_00001761	1	85649988	85709998	+	Gm17017	ENSMUSG00000090246	predicted gene 17017 [Source:MGI Symbol;Acc:MGI:4820558]	-	gene	overlapping	0	0.263011	0.324942	2.16811	-0.529859
TCONS_00001763	1	85763794	85763871	+	A630001G21Rik	ENSMUSG00000052760	RIKEN cDNA A630001G21 gene [Source:MGI Symbol;Acc:MGI:2443131]	-	gene	overlapping	0	-0.555659	-0.883703	-0.800964	-0.60586
TCONS_00001764	1	85771372	85771765	+	A630001G21Rik	ENSMUSG00000052760	RIKEN cDNA A630001G21 gene [Source:MGI Symbol;Acc:MGI:2443131]	-	gene	overlapping	0	-0.555659	-0.883703	-0.800964	-0.60586
TCONS_00001766	1	85793232	85851579	+	Cab39	ENSMUSG00000036707	calcium binding protein 39 [Source:MGI Symbol;Acc:MGI:107438]	+	gene	overlapping	0	5.95888	6.17399	6.62837	6.5562
TCONS_00001767	1	85894281	85908692	+	Itm2c	ENSMUSG00000026223	integral membrane protein 2C [Source:MGI Symbol;Acc:MGI:1927594]	+	gene	overlapping	0	1.30611	0.324942	1.84832	1.7423
TCONS_00005797	1	85938317	85997794	-	4933407L21Rik	ENSMUSG00000026224	RIKEN cDNA 4933407L21 gene [Source:MGI Symbol;Acc:MGI:1918391]	+	gene	overlapping	0	-0.555659	0.324942	0.87936	2.66055
TCONS_00001771	1	86064377	86139301	+	Psmd1	ENSMUSG00000026229	proteasome (prosome, macropain) 26S subunit, non-ATPase, 1 [Source:MGI Symbol;Acc:MGI:1917497]	+	gene	overlapping	0	8.53837	8.26995	8.43915	8.38218
TCONS_00001773	1	86154758	86252410	+	RP24-308M3.1	ENSMUSG00000094638	No description	+	gene	overlapping	0	3.41341	2.98106	3.61012	2.94982
TCONS_00005799	1	86275509	86301375	-	Armc9	ENSMUSG00000062590	armadillo repeat containing 9 [Source:MGI Symbol;Acc:MGI:1926045]	+	gene	overlapping	0	-0.504991	-0.883703	-0.750297	-0.453857
TCONS_00001774	1	86300434	86300836	+	Gm16341	ENSMUSG00000087538	predicted gene 16341 [Source:MGI Symbol;Acc:MGI:3840137]	-	gene	overlapping	0	-0.555659	-0.883703	-0.800964	-0.60586
TCONS_00001775	1	86301467	86310125	+	B3gnt7	ENSMUSG00000079445	UDP-GlcNAc:betaGal beta-1,3-N-acetylglucosaminyltransferase 7 [Source:MGI Symbol;Acc:MGI:2384394]	+	gene	overlapping	0	4.1256	4.92551	3.58155	4.81183
TCONS_00005806	1	86307213	86317930	-	B3gnt7	ENSMUSG00000079445	UDP-GlcNAc:betaGal beta-1,3-N-acetylglucosaminyltransferase 7 [Source:MGI Symbol;Acc:MGI:2384394]	+	gene	overlapping	0	-0.504991	-0.883703	-0.750297	-0.60586
TCONS_00005808	1	86320029	86320760	-	null					Not found	0	-0.555659	-0.883703	-0.800964	-0.60586
TCONS_00001778	1	86320108	86320680	+	null					Not found	0	-0.555659	-0.883703	-0.800964	-0.60586
TCONS_00005810	1	86344397	86359668	-	Ncl	ENSMUSG00000026234	nucleolin [Source:MGI Symbol;Acc:MGI:97286]	-	gene	overlapping	0	10.9928	11.0601	11.3286	11.2363
TCONS_00001781	1	86359532	86367964	+	C130036L24Rik	ENSMUSG00000073627	RIKEN cDNA C130036L24 gene [Source:MGI Symbol;Acc:MGI:2441877]	+	gene	overlapping	0	-0.171658	-0.883703	-0.800964	-0.60586
TCONS_00001784	1	86372264	86372863	+	C130036L24Rik	ENSMUSG00000073627	RIKEN cDNA C130036L24 gene [Source:MGI Symbol;Acc:MGI:2441877]	+	gene	overlapping	0	-0.555659	-0.883703	-0.800964	-0.60586
TCONS_00005812	1	86422000	86422805	-	null					Not found	0	-0.555659	-0.883703	-0.800964	-0.60586
TCONS_00005813	1	86456769	86457437	-	null					Not found	0	-0.555659	-0.883703	-0.800964	-0.60586
TCONS_00005814	1	86458942	86461373	-	null					Not found	0	-0.555659	-0.883703	-0.800964	-0.60586
TCONS_00005815	1	86465675	86467486	-	null					Not found	0	-0.555659	-0.883703	-0.800964	-0.60586
TCONS_00001785	1	86474216	86474387	+	null					Not found	0	-0.555659	-0.883703	-0.800964	-0.60586
TCONS_00005816	1	86486881	86487457	-	null					Not found	0	-0.555659	-0.883703	-0.800964	-0.60586
TCONS_00001786	1	86487762	86488305	+	null					Not found	0	-0.555659	-0.883703	-0.800964	-0.60586
TCONS_00001787	1	86513808	86514360	+	null					Not found	0	-0.555659	-0.883703	-0.800964	-0.60586
TCONS_00001788	1	86516380	86519049	+	null					Not found	0	-0.555659	-0.883703	-0.800964	-0.60586
TCONS_00001790	1	86526394	86530698	+	Ptma	ENSMUSG00000026238	prothymosin alpha [Source:MGI Symbol;Acc:MGI:97803]	+	gene	overlapping	0	6.0339	6.06628	5.62708	5.94548
TCONS_00005820	1	86542994	86582629	-	Pde6d	ENSMUSG00000026239	phosphodiesterase 6D, cGMP-specific, rod, delta [Source:MGI Symbol;Acc:MGI:1270843]	-	gene	overlapping	0	6.86735	6.90164	6.10532	6.43137
TCONS_00001795	1	86555256	86608994	+	Pde6d	ENSMUSG00000026239	phosphodiesterase 6D, cGMP-specific, rod, delta [Source:MGI Symbol;Acc:MGI:1270843]	-	gene	overlapping	0	4.07914	4.0184	4.40365	4.29207
TCONS_00005821	1	86607609	86608682	-	Cops7b	ENSMUSG00000026240	COP9 (constitutive photomorphogenic) homolog, subunit 7b (Arabidopsis thaliana) [Source:MGI Symbol;Acc:MGI:1349388]	+	gene	upstream	631	-0.555659	-0.883703	-0.800964	-0.60586
TCONS_00005822	1	86666293	86670580	-	Nppc	ENSMUSG00000026241	natriuretic peptide type C [Source:MGI Symbol;Acc:MGI:97369]	-	gene	overlapping	0	-0.555659	-0.833035	-0.800964	-0.529859
TCONS_00005823	1	86670862	86671645	-	Nppc	ENSMUSG00000026241	natriuretic peptide type C [Source:MGI Symbol;Acc:MGI:97369]	-	gene	downstream	289	-0.555659	-0.883703	-0.750297	-0.60586
TCONS_00005824	1	86675974	86677320	-	null					Not found	0	-0.555659	-0.883703	-0.800964	-0.60586
TCONS_00001803	1	86703648	87050097	+	Dis3l2	ENSMUSG00000053333	DIS3 mitotic control homolog (S. cerevisiae)-like 2 [Source:MGI Symbol;Acc:MGI:2442555]	+	gene	overlapping	0	3.37778	3.10637	3.51499	3.63111
TCONS_00005825	1	87052548	87057800	-	null					Not found	0	-0.555659	-0.883703	-0.800964	-0.60586
TCONS_00001806	1	87061010	87061247	+	null					Not found	0	-0.555659	-0.883703	-0.800964	-0.60586
TCONS_00001807	1	87073523	87074619	+	null					Not found	0	-0.555659	-0.883703	-0.800964	-0.60586
TCONS_00005826	1	87086690	87089977	-	Alppl2	ENSMUSG00000026246	alkaline phosphatase, placental-like 2 [Source:MGI Symbol;Acc:MGI:108009]	-	gene	overlapping	0	0.596344	0.708943	1.21269	3.89982
TCONS_00001808	1	87125008	87127912	+	Akp3	ENSMUSG00000036500	alkaline phosphatase 3, intestine, not Mn requiring [Source:MGI Symbol;Acc:MGI:87984]	+	gene	overlapping	0	-0.504991	-0.883703	-0.800964	-0.60586
TCONS_00001809	1	87183313	87188483	+	Prss56	ENSMUSG00000036480	protease, serine 56 [Source:MGI Symbol;Acc:MGI:1916703]	+	gene	overlapping	0	-0.12099	-0.449034	-0.699629	0.546143
TCONS_00001812	1	87190596	87212730	+	Chrnd	ENSMUSG00000026251	cholinergic receptor, nicotinic, delta polypeptide [Source:MGI Symbol;Acc:MGI:87893]	+	gene	overlapping	0	6.07306	5.55207	5.77582	5.28603
TCONS_00001818	1	87213715	87240488	+	Eif4e2	ENSMUSG00000026254	eukaryotic translation initiation factor 4E member 2 [Source:MGI Symbol;Acc:MGI:1914440]	+	gene	overlapping	0	6.19206	6.52814	5.77381	6.09079
TCONS_00005828	1	87243937	87246390	-	null					Not found	0	-0.555659	-0.883703	-0.416963	-0.60586
TCONS_00001824	1	87246059	87310839	+	U6	ENSMUSG00000088318	U6 spliceosomal RNA [Source:RFAM;Acc:RF00026]	+	gene	overlapping	0	0.212343	-0.203379	-0.221976	-0.529859
TCONS_00005829	1	87317246	87324886	-	null					Not found	0	0.457998	-0.782367	1.14848	-0.529859
CUFF.1570.1	1	87317910	87318153	+	null					Not found	0	-0.555659	-0.883703	-0.800964	-0.60586
TCONS_00005832	1	87326298	87326764	-	Gigyf2	ENSMUSG00000048000	GRB10 interacting GYF protein 2 [Source:MGI Symbol;Acc:MGI:2138584]	+	gene	downstream	234	-0.555659	-0.883703	-0.800964	-0.60586
TCONS_00001826	1	87326830	87450916	+	Gigyf2	ENSMUSG00000048000	GRB10 interacting GYF protein 2 [Source:MGI Symbol;Acc:MGI:2138584]	+	gene	overlapping	0	8.57874	8.80167	8.65144	8.74328
NOMERGE_TCONS_00000059	1	87386363	87394729	-	Gigyf2	ENSMUSG00000048000	GRB10 interacting GYF protein 2 [Source:MGI Symbol;Acc:MGI:2138584]	+	gene	overlapping	0	-0.504991	-0.883703	-0.800964	-0.60586
TCONS_00001829	1	87470264	87475459	+	3110079O15Rik	ENSMUSG00000026258	RIKEN cDNA 3110079O15 gene [Source:MGI Symbol;Acc:MGI:1920484]	+	gene	overlapping	0	-0.555659	-0.883703	-0.800964	-0.60586
TCONS_00005836	1	87473344	87573870	-	3110079O15Rik	ENSMUSG00000026258	RIKEN cDNA 3110079O15 gene [Source:MGI Symbol;Acc:MGI:1920484]	+	gene	overlapping	0	5.20347	5.44829	5.48026	5.04755
NOMERGE_TCONS_00000022	1	87509889	87596670	+	Ngef	ENSMUSG00000026259	neuronal guanine nucleotide exchange factor [Source:MGI Symbol;Acc:MGI:1858414]	-	gene	overlapping	0	0.0233296	-0.883703	-0.800964	0.546143
TCONS_00001831	1	87609034	87610082	+	null					Not found	0	-0.555659	-0.883703	-0.800964	-0.60586
TCONS_00001834	1	87619089	87720507	+	Inpp5d	ENSMUSG00000026288	inositol polyphosphate-5-phosphatase D [Source:MGI Symbol;Acc:MGI:107357]	+	gene	overlapping	0	6.16925	5.92362	5.42051	4.74712
CUFF.1587.1	1	87679407	87679430	-	Inpp5d	ENSMUSG00000026288	inositol polyphosphate-5-phosphatase D [Source:MGI Symbol;Acc:MGI:107357]	+	gene	overlapping	0	-0.555659	-0.883703	-0.800964	-0.60586
TCONS_00005841	1	87718438	87740854	-	Inpp5d	ENSMUSG00000026288	inositol polyphosphate-5-phosphatase D [Source:MGI Symbol;Acc:MGI:107357]	+	gene	overlapping	0	0.263011	2.2831	0.986669	2.11078
TCONS_00005849	1	87747702	87755818	-	Atg16l1	ENSMUSG00000026289	autophagy-related 16-like 1 (yeast) [Source:MGI Symbol;Acc:MGI:1924290]	+	gene	downstream	52	-0.555659	-0.883703	-0.750297	-0.60586
TCONS_00001840	1	87755870	87794304	+	Atg16l1	ENSMUSG00000026289	autophagy-related 16-like 1 (yeast) [Source:MGI Symbol;Acc:MGI:1924290]	+	gene	overlapping	0	7.52886	7.69278	7.54165	7.61957
TCONS_00001846	1	87796467	87796871	+	5830472F04Rik	ENSMUSG00000073623	RIKEN cDNA 5830472F04 gene [Source:MGI Symbol;Acc:MGI:1923354]	+	gene	overlapping	0	-0.555659	-0.883703	-0.800964	-0.60586
TCONS_00001847	1	87803680	87825382	+	Sag	ENSMUSG00000056055	retinal S-antigen [Source:MGI Symbol;Acc:MGI:98227]	+	gene	overlapping	0	-0.555659	-0.883703	-0.750297	-0.529859
TCONS_00001851	1	87853256	87945146	+	Dgkd	ENSMUSG00000070738	diacylglycerol kinase, delta [Source:MGI Symbol;Acc:MGI:2138334]	+	gene	overlapping	0	7.54281	7.38429	7.64848	7.11668
TCONS_00005853	1	87945111	88008551	-	Usp40	ENSMUSG00000005501	ubiquitin specific peptidase 40 [Source:MGI Symbol;Acc:MGI:2443184]	-	gene	overlapping	0	1.23197	2.34457	0.741014	2.49959
TCONS_00001856	1	88055388	88217403	+	Ugt1a10	ENSMUSG00000090165	UDP glycosyltransferase 1 family, polypeptide A10 [Source:MGI Symbol;Acc:MGI:3580642]	+	gene	overlapping	0	-0.555659	-0.883703	-0.800964	-0.60586
TCONS_00005854	1	88204732	88205751	-	Ugt1a10	ENSMUSG00000090165	UDP glycosyltransferase 1 family, polypeptide A10 [Source:MGI Symbol;Acc:MGI:3580642]	+	gene	overlapping	0	-0.555659	-0.782367	-0.800964	0.546143
TCONS_00001859	1	88226986	88262289	+	Heatr7b1	ENSMUSG00000079429	HEAT repeat containing 7B1 [Source:MGI Symbol;Acc:MGI:3705228]	+	gene	overlapping	0	-0.171658	-0.833035	-0.416963	-0.60586
TCONS_00005855	1	88258761	88259995	-	Heatr7b1	ENSMUSG00000079429	HEAT repeat containing 7B1 [Source:MGI Symbol;Acc:MGI:3705228]	+	gene	overlapping	0	0.986319	1.06574	0.986669	-0.60586
TCONS_00005858	1	88262471	88277737	-	Hjurp	ENSMUSG00000044783	Holliday junction recognition protein [Source:MGI Symbol;Acc:MGI:2685821]	-	gene	overlapping	0	8.83059	8.25166	9.04807	8.12858
TCONS_00005859	1	88522037	88523840	-	null					Not found	0	0.740664	3.57359	1.60267	5.08655
TCONS_00001865	1	88567513	88567790	+	null					Not found	0	-0.555659	-0.883703	-0.800964	0.0461428
TCONS_00001867	1	88614006	88622046	+	null					Not found	0	2.51129	2.20409	3.34347	5.11783
TCONS_00005861	1	88698225	88702221	-	Arl4c	ENSMUSG00000049866	ADP-ribosylation factor-like 4C [Source:MGI Symbol;Acc:MGI:2445172]	-	gene	overlapping	0	-0.555659	-0.883703	-0.800964	-0.60586
TCONS_00005864	1	88793232	88810846	-	null					Not found	0	0.407331	-0.254046	-0.750297	0.838624
TCONS_00005872	1	88816203	88823026	-	null					Not found	0	-0.555659	-0.883703	-0.221976	-0.529859
TCONS_00005874	1	88825314	88829309	-	null					Not found	0	-0.555659	-0.883703	-0.800964	-0.60586
TCONS_00005876	1	88836079	88836338	-	null					Not found	0	-0.555659	-0.883703	-0.800964	-0.60586
TCONS_00001868	1	89070415	89155174	+	Sh3bp4	ENSMUSG00000036206	SH3-domain binding protein 4 [Source:MGI Symbol;Acc:MGI:2138297]	+	gene	overlapping	0	5.04559	4.75646	4.81514	4.32535
CUFF.1625.1	1	89089535	89090193	-	Sh3bp4	ENSMUSG00000036206	SH3-domain binding protein 4 [Source:MGI Symbol;Acc:MGI:2138297]	+	gene	overlapping	0	-0.555659	-0.883703	-0.800964	-0.60586
TCONS_00001874	1	89188416	89189553	+	null					Not found	0	-0.555659	-0.883703	-0.800964	-0.60586
TCONS_00001876	1	89274934	89300579	+	null					Not found	0	2.4037	3.50638	3.38019	4.16055
TCONS_00005883	1	89302698	89359013	-	null					Not found	0	2.31965	2.72374	3.26148	2.71607
TCONS_00001886	1	89454790	89895461	+	Agap1	ENSMUSG00000055013	ArfGAP with GTPase domain, ankyrin repeat and PH domain 1 [Source:MGI Symbol;Acc:MGI:2653690]	+	gene	overlapping	0	6.80946	6.83963	6.69338	6.30939
TCONS_00005886	1	89577771	89582467	-	Agap1	ENSMUSG00000055013	ArfGAP with GTPase domain, ankyrin repeat and PH domain 1 [Source:MGI Symbol;Acc:MGI:2653690]	+	gene	overlapping	0	3.0896	3.81142	4.82459	4.77381
TCONS_00005888	1	89927957	89934293	-	Gbx2	ENSMUSG00000034486	gastrulation brain homeobox 2 [Source:MGI Symbol;Acc:MGI:95668]	-	gene	overlapping	0	8.39633	8.52476	8.0799	8.4357
TCONS_00001894	1	89930234	89931862	+	Gbx2	ENSMUSG00000034486	gastrulation brain homeobox 2 [Source:MGI Symbol;Acc:MGI:95668]	-	gene	overlapping	0	-0.555659	-0.883703	-0.800964	-0.60586
TCONS_00001895	1	90012558	90012941	+	Asb18	ENSMUSG00000067081	ankyrin repeat and SOCS box-containing 18 [Source:MGI Symbol;Acc:MGI:2655109]	-	gene	overlapping	0	-0.555659	-0.883703	-0.800964	-0.60586
TCONS_00001896	1	90040847	90054620	+	Iqca	ENSMUSG00000026301	IQ motif containing with AAA domain [Source:MGI Symbol;Acc:MGI:1922168]	-	gene	overlapping	0	0.0233296	-0.499701	1.21269	-0.453857
TCONS_00005890	1	90042130	90090158	-	Iqca	ENSMUSG00000026301	IQ motif containing with AAA domain [Source:MGI Symbol;Acc:MGI:1922168]	-	gene	overlapping	0	6.67474	6.97233	7.07023	7.18716
TCONS_00001897	1	90090226	90091145	+	Iqca	ENSMUSG00000026301	IQ motif containing with AAA domain [Source:MGI Symbol;Acc:MGI:1922168]	-	gene	overlapping	0	-0.555659	-0.883703	-0.800964	-0.60586
TCONS_00001898	1	90097097	90097979	+	Iqca	ENSMUSG00000026301	IQ motif containing with AAA domain [Source:MGI Symbol;Acc:MGI:1922168]	-	gene	overlapping	0	-0.555659	-0.883703	-0.800964	-0.60586
TCONS_00001899	1	90191626	90216830	+	Cxcr7	ENSMUSG00000044337	chemokine (C-X-C motif) receptor 7 [Source:MGI Symbol;Acc:MGI:109562]	+	gene	overlapping	0	1.12467	1.32494	0.162025	0.838624
TCONS_00001904	1	90286401	90304630	+	null					Not found	0	-0.504991	-0.883703	-0.800964	-0.0298587
TCONS_00001905	1	90329058	90334250	+	null					Not found	0	-0.555659	-0.0650327	-0.800964	2.04614
TCONS_00005892	1	90416246	90418139	-	null					Not found	0	-0.555659	-0.883703	-0.800964	-0.60586
TCONS_00005893	1	90420275	90421385	-	null					Not found	0	-0.555659	-0.883703	-0.800964	-0.60586
TCONS_00005894	1	90435943	90437546	-	null					Not found	0	-0.555659	-0.833035	-0.0329623	-0.60586
TCONS_00001906	1	90437794	90452358	+	null					Not found	0	-0.504991	0.658276	-0.416963	0.262623
TCONS_00005895	1	90517769	90521170	-	null					Not found	0	-0.504991	-0.883703	-0.800964	-0.60586
TCONS_00005897	1	90548499	90598092	-	null					Not found	0	1.65299	0.853263	1.12501	0.338624
TCONS_00001907	1	90594167	90594924	+	null					Not found	0	-0.555659	-0.883703	-0.800964	-0.60586
TCONS_00001908	1	90603255	90613341	+	Cops8	ENSMUSG00000034432	COP9 (constitutive photomorphogenic) homolog, subunit 8 (Arabidopsis thaliana) [Source:MGI Symbol;Acc:MGI:1915363]	+	gene	overlapping	0	6.51878	6.59425	6.94799	7.07582
TCONS_00001909	1	90620261	90631449	+	null					Not found	0	-0.555659	0.708943	-0.800964	0.338624
TCONS_00001912	1	90650353	90660593	+	null					Not found	0	-0.504991	-0.833035	-0.750297	0.338624
TCONS_00001916	1	90684517	90686135	+	null					Not found	0	-0.0703224	-0.883703	-0.699629	-0.60586
TCONS_00001917	1	90694516	90704628	+	null					Not found	0	1.51464	1.67791	1.40768	1.7423
TCONS_00005901	1	90758782	90760025	-	null					Not found	0	-0.555659	-0.883703	-0.800964	-0.60586
TCONS_00005904	1	90766860	90843952	-	Col6a3	ENSMUSG00000048126	collagen, type VI, alpha 3 [Source:MGI Symbol;Acc:MGI:88461]	-	gene	overlapping	0	6.16514	6.15771	6.18304	5.96051
TCONS_00005906	1	90886186	90892004	-	null					Not found	0	2.42696	2.90393	2.85364	2.99959
TCONS_00001920	1	90915085	90951142	+	Mlph	ENSMUSG00000026303	melanophilin [Source:MGI Symbol;Acc:MGI:2176380]	+	gene	overlapping	0	-0.555659	-0.449034	-0.800964	1.04614
TCONS_00005908	1	90921124	90925514	-	Mlph	ENSMUSG00000026303	melanophilin [Source:MGI Symbol;Acc:MGI:2176380]	+	gene	overlapping	0	-0.555659	0.0792871	-0.800964	-0.60586
TCONS_00005910	1	90958135	90967667	-	Rab17	ENSMUSG00000026304	RAB17, member RAS oncogene family [Source:MGI Symbol;Acc:MGI:104640]	-	gene	overlapping	0	-0.555659	-0.883703	-0.800964	-0.60586
CUFF.1725.1	1	90995627	91000526	-	Lrrfip1	ENSMUSG00000026305	leucine rich repeat (in FLII) interacting protein 1 [Source:MGI Symbol;Acc:MGI:1342770]	+	gene	overlapping	0	-0.555659	-0.883703	-0.800964	-0.60586
TCONS_00001922	1	90998727	91117435	+	Lrrfip1	ENSMUSG00000026305	leucine rich repeat (in FLII) interacting protein 1 [Source:MGI Symbol;Acc:MGI:1342770]	+	gene	overlapping	0	8.99493	9.28017	9.07292	9.44663
CUFF.1728.1	1	91049144	91052738	-	Lrrfip1	ENSMUSG00000026305	leucine rich repeat (in FLII) interacting protein 1 [Source:MGI Symbol;Acc:MGI:1342770]	+	gene	overlapping	0	-0.555659	-0.782367	-0.750297	-0.60586
TCONS_00001929	1	91119881	91131297	+	Lrrfip1	ENSMUSG00000026305	leucine rich repeat (in FLII) interacting protein 1 [Source:MGI Symbol;Acc:MGI:1342770]	+	gene	overlapping	0	0.791332	1.99161	0.87936	0.762622
TCONS_00001931	1	91133594	91134295	+	null					Not found	0	-0.555659	-0.883703	-0.800964	-0.60586
TCONS_00001934	1	91145008	91171373	+	Rbm44	ENSMUSG00000070732	RNA binding motif protein 44 [Source:MGI Symbol;Acc:MGI:2685663]	+	gene	overlapping	0	3.93079	3.13339	3.63496	2.2423
TCONS_00001937	1	91179822	91225196	+	Ramp1	ENSMUSG00000034353	receptor (calcitonin) activity modifying protein 1 [Source:MGI Symbol;Acc:MGI:1858418]	+	gene	overlapping	0	0.0233297	-0.883703	-0.699629	-0.60586
TCONS_00005914	1	91230878	91234673	-	null					Not found	0	-0.454323	-0.304714	-0.416963	-0.60586
TCONS_00005915	1	91238166	91241393	-	null					Not found	0	-0.12099	-0.833035	-0.750297	-0.529859
TCONS_00001939	1	91240256	91241632	+	null					Not found	0	-0.555659	-0.883703	-0.800964	-0.60586
TCONS_00001940	1	91246491	91289315	+	Ube2f	ENSMUSG00000034343	ubiquitin-conjugating enzyme E2F (putative) [Source:MGI Symbol;Acc:MGI:1915171]	+	gene	overlapping	0	4.30341	4.48183	4.31157	4.2194
TCONS_00001950	1	91296045	91296936	+	Scly	ENSMUSG00000026307	selenocysteine lyase [Source:MGI Symbol;Acc:MGI:1355310]	+	gene	downstream	1402	-0.555659	-0.883703	-0.750297	-0.529859
TCONS_00005916	1	91297203	91304405	-	Scly	ENSMUSG00000026307	selenocysteine lyase [Source:MGI Symbol;Acc:MGI:1355310]	+	gene	overlapping	0	-0.555659	-0.883703	-0.800964	-0.60586
TCONS_00001951	1	91298338	91321075	+	Scly	ENSMUSG00000026307	selenocysteine lyase [Source:MGI Symbol;Acc:MGI:1355310]	+	gene	overlapping	0	-0.504991	-0.254046	-0.750297	-0.60586
NOMERGE_TCONS_00000060	1	91305092	91321101	-	Scly	ENSMUSG00000026307	selenocysteine lyase [Source:MGI Symbol;Acc:MGI:1355310]	+	gene	overlapping	0	-0.555659	-0.883703	-0.800964	-0.60586
TCONS_00005917	1	91329451	91329950	-	Espnl	ENSMUSG00000049515	espin-like [Source:MGI Symbol;Acc:MGI:2685402]	+	gene	overlapping	0	-0.555659	-0.883703	-0.800964	-0.60586
TCONS_00001952	1	91330161	91331405	+	Espnl	ENSMUSG00000049515	espin-like [Source:MGI Symbol;Acc:MGI:2685402]	+	gene	overlapping	0	-0.555659	-0.883703	-0.800964	-0.60586
TCONS_00001953	1	91341867	91347591	+	Espnl	ENSMUSG00000049515	espin-like [Source:MGI Symbol;Acc:MGI:2685402]	+	gene	overlapping	0	-0.555659	-0.883703	-0.800964	-0.60586
TCONS_00001955	1	91349274	91362418	+	Klhl30	ENSMUSG00000026308	kelch-like 30 (Drosophila) [Source:MGI Symbol;Acc:MGI:1918038]	+	gene	overlapping	0	0.929678	0.268301	1.22261	2.27586
TCONS_00001961	1	91366034	91375913	+	Fam132b	ENSMUSG00000047443	family with sequence similarity 132, member B [Source:MGI Symbol;Acc:MGI:3606476]	+	gene	overlapping	0	3.08145	3.71871	3.56445	2.79207
TCONS_00005919	1	91375831	91398847	-	Ilkap	ENSMUSG00000026309	integrin-linked kinase-associated serine/threonine phosphatase 2C [Source:MGI Symbol;Acc:MGI:1914694]	-	gene	overlapping	0	4.02582	3.98707	4.20637	3.95303
CUFF.1680.1	1	91393673	91393851	+	Ilkap	ENSMUSG00000026309	integrin-linked kinase-associated serine/threonine phosphatase 2C [Source:MGI Symbol;Acc:MGI:1914694]	-	gene	overlapping	0	-0.555659	-0.883703	-0.800964	-0.60586
TCONS_00005920	1	91411482	91413222	-	Hes6	ENSMUSG00000067071	hairy and enhancer of split 6 (Drosophila) [Source:MGI Symbol;Acc:MGI:1859852]	-	gene	overlapping	0	3.78376	3.47975	3.62761	3.54332
TCONS_00005921	1	91414951	91459330	-	Per2	ENSMUSG00000055866	period homolog 2 (Drosophila) [Source:MGI Symbol;Acc:MGI:1195265]	-	gene	overlapping	0	0.0233297	-0.883703	-0.416963	0.262622
TCONS_00005925	1	91467998	91470354	-	null					Not found	0	-0.555659	-0.833035	-0.800964	-0.60586
TCONS_00005928	1	91487189	91489978	-	null					Not found	0	-0.171658	0.217633	-0.699629	-0.60586
TCONS_00001964	1	91494621	91532096	+	Traf3ip1	ENSMUSG00000034292	TRAF3 interacting protein 1 [Source:MGI Symbol;Acc:MGI:1921269]	+	gene	overlapping	0	4.33118	4.67322	4.11911	4.43189
TCONS_00001970	1	91540510	91559590	+	Asb1	ENSMUSG00000026311	ankyrin repeat and SOCS box-containing 1 [Source:MGI Symbol;Acc:MGI:1929735]	+	gene	overlapping	0	-0.171658	-0.499701	0.0743471	1.49959
TCONS_00001972	1	91625244	91625696	+	null					Not found	0	-0.555659	-0.883703	-0.800964	-0.60586
TCONS_00001973	1	91668537	91670416	+	null					Not found	0	-0.504991	-0.883703	-0.800964	-0.60586
TCONS_00001975	1	91734849	91742089	+	null					Not found	0	-0.555659	-0.883703	-0.366296	-0.60586
TCONS_00001976	1	91757275	91758070	+	null					Not found	0	-0.504991	-0.883703	-0.800964	-0.60586
TCONS_00005930	1	91887550	91888882	-	null					Not found	0	-0.171658	0.796622	-0.366296	1.70711
TCONS_00005938	1	91928762	92180859	-	Hdac4	ENSMUSG00000073617	histone deacetylase 4 [Source:MGI Symbol;Acc:MGI:3036234]	-	gene	overlapping	0	3.97454	4.51199	4.00365	3.83107
NOMERGE_TCONS_00000023	1	91989051	91992628	+	Hdac4	ENSMUSG00000026313	histone deacetylase 4 [Source:MGI Symbol;Acc:MGI:3036234]	-	gene	overlapping	0	-0.555659	-0.883703	-0.800964	-0.60586
TCONS_00001978	1	92180649	92191281	+	null					Not found	0	1.03699	1.2683	-0.171308	2.2423
TCONS_00005941	1	92217998	92245858	-	null					Not found	0	-0.504991	-0.254046	-0.800964	-0.60586
TCONS_00001983	1	92375411	92393626	+	null					Not found	0	-0.555659	-0.883703	-0.750297	-0.60586
TCONS_00005944	1	92424582	92473860	-	Ndufa10	ENSMUSG00000026260	NADH dehydrogenase (ubiquinone) 1 alpha subcomplex 10 [Source:MGI Symbol;Acc:MGI:1914523]	-	gene	overlapping	0	5.83008	5.65473	6.10204	5.99959
TCONS_00005949	1	92476074	92477743	-	Olfr1416	ENSMUSG00000067064	olfactory receptor 1416 [Source:MGI Symbol;Acc:MGI:3031250]	-	gene	upstream	1938	-0.555659	-0.883703	-0.800964	-0.529859
TCONS_00005950	1	92487281	92488678	-	null					Not found	0	-0.555659	-0.883703	-0.800964	-0.60586
TCONS_00001985	1	92500907	92502546	+	null					Not found	0	-0.555659	-0.883703	-0.800964	-0.60586
TCONS_00005951	1	92520046	92521277	-	Olfr1414	ENSMUSG00000042849	olfactory receptor 1414 [Source:MGI Symbol;Acc:MGI:3031248]	-	gene	downstream	1531	-0.555659	-0.883703	-0.750297	-0.60586
TCONS_00005952	1	92525958	92526599	-	null					Not found	0	-0.555659	-0.883703	-0.800964	-0.60586
TCONS_00005954	1	92637144	92642080	-	Myeov2	ENSMUSG00000073616	myeloma overexpressed 2 [Source:MGI Symbol;Acc:MGI:1914165]	-	gene	overlapping	0	4.03027	4.42133	4.9791	4.83012
TCONS_00005955	1	92685640	92686024	-	null					Not found	0	-0.555659	-0.883703	-0.800964	-0.60586
TCONS_00005956	1	92689161	92695910	-	null					Not found	0	-0.555659	-0.883703	-0.800964	-0.60586
TCONS_00001988	1	92704945	92709093	+	null					Not found	0	2.98128	2.33974	3.40935	4.1472
TCONS_00005959	1	92713145	92717262	-	null					Not found	0	4.73843	5.20299	4.80374	5.50632
TCONS_00001991	1	92715169	92722566	+	null					Not found	0	-0.171658	-0.499701	-0.366296	-0.529859
TCONS_00001993	1	92742102	92742919	+	null					Not found	0	-0.504991	-0.833035	-0.800964	-0.60586
TCONS_00001994	1	92831341	92860198	+	Gpc1	ENSMUSG00000034220	glypican 1 [Source:MGI Symbol;Acc:MGI:1194891]	+	gene	overlapping	0	2.76561	3.44217	3.50281	3.7293
TCONS_00005961	1	92861050	92902949	-	Ankmy1	ENSMUSG00000034212	ankyrin repeat and MYND domain containing 1 [Source:MGI Symbol;Acc:MGI:3045261]	-	gene	overlapping	0	0.847973	1.65828	1.87936	1.04614
CUFF.1712.1	1	92901455	92903667	+	Ankmy1	ENSMUSG00000034212	ankyrin repeat and MYND domain containing 1 [Source:MGI Symbol;Acc:MGI:3045261]	-	gene	overlapping	0	-0.555659	-0.883703	-0.800964	-0.60586
TCONS_00001996	1	92906989	92908620	+	Dusp28	ENSMUSG00000047067	dual specificity phosphatase 28 [Source:MGI Symbol;Acc:MGI:1914696]	+	gene	overlapping	0	-0.555659	-0.883703	-0.800964	-0.0298587
TCONS_00005966	1	92908380	92910727	-	Dusp28	ENSMUSG00000047067	dual specificity phosphatase 28 [Source:MGI Symbol;Acc:MGI:1914696]	+	gene	overlapping	0	-0.555659	-0.883703	-0.800964	-0.60586
TCONS_00001997	1	92910783	92925919	+	Rnpepl1	ENSMUSG00000026269	arginyl aminopeptidase (aminopeptidase B)-like 1 [Source:MGI Symbol;Acc:MGI:1914170]	+	gene	overlapping	0	1.72712	2.84991	0.95349	1.33862
TCONS_00002001	1	92931175	92932360	+	null					Not found	0	-0.555659	-0.883703	-0.800964	-0.60586
TCONS_00002003	1	92934218	92947965	+	Capn10	ENSMUSG00000026270	calpain 10 [Source:MGI Symbol;Acc:MGI:1344392]	+	gene	overlapping	0	3.5221	3.42008	3.60267	3.86807
TCONS_00002005	1	92955193	92956802	+	null					Not found	0	-0.504991	-0.833035	1.42731	0.262623
TCONS_00002006	1	92957100	92989247	+	Gpr35	ENSMUSG00000026271	G protein-coupled receptor 35 [Source:MGI Symbol;Acc:MGI:1929509]	+	gene	overlapping	0	5.76544	5.68413	5.84297	5.55211
TCONS_00005967	1	93015456	93101865	-	Kif1a	ENSMUSG00000014602	kinesin family member 1A [Source:MGI Symbol;Acc:MGI:108391]	-	gene	overlapping	0	-0.555659	-0.883703	-0.800964	-0.529859
TCONS_00002013	1	93121454	93122725	+	null					Not found	0	-0.555659	-0.883703	-0.800964	-0.60586
TCONS_00005969	1	93128661	93129122	-	null					Not found	0	-0.555659	-0.883703	-0.800964	-0.60586
TCONS_00005970	1	93172151	93172930	-	null					Not found	0	-0.555659	-0.883703	-0.800964	-0.60586
TCONS_00005971	1	93234863	93235707	-	Sned1	ENSMUSG00000047793	sushi, nidogen and EGF-like domains 1 [Source:MGI Symbol;Acc:MGI:3045960]	+	gene	downstream	134	-0.555659	-0.883703	-0.800964	-0.60586
TCONS_00002017	1	93235837	93301065	+	Sned1	ENSMUSG00000047793	sushi, nidogen and EGF-like domains 1 [Source:MGI Symbol;Acc:MGI:3045960]	+	gene	overlapping	0	4.00895	4.30632	4.01227	3.82726
TCONS_00005972	1	93299220	93308036	-	Sned1	ENSMUSG00000047793	sushi, nidogen and EGF-like domains 1 [Source:MGI Symbol;Acc:MGI:3045960]	+	gene	overlapping	0	7.53215	7.30368	7.55921	7.73924
TCONS_00005974	1	93308753	93343465	-	Pask	ENSMUSG00000026274	PAS domain containing serine/threonine kinase [Source:MGI Symbol;Acc:MGI:2155936]	-	gene	overlapping	0	2.59728	4.04039	3.06677	3.2423
TCONS_00002026	1	93337578	93373490	+	Pask	ENSMUSG00000026274	PAS domain containing serine/threonine kinase [Source:MGI Symbol;Acc:MGI:2155936]	-	gene	overlapping	0	6.39425	6.09406	6.4907	6.30939
TCONS_00002028	1	93373896	93404047	+	Ano7	ENSMUSG00000034107	anoctamin 7 [Source:MGI Symbol;Acc:MGI:3052714]	+	gene	overlapping	0	-0.504991	-0.833035	-0.750297	-0.529859
TCONS_00005976	1	93404689	93478808	-	Hdlbp	ENSMUSG00000034088	high density lipoprotein (HDL) binding protein [Source:MGI Symbol;Acc:MGI:99256]	-	gene	overlapping	0	9.63183	9.72566	9.7719	9.59132
TCONS_00002030	1	93478582	93510260	+	Hdlbp	ENSMUSG00000034088	high density lipoprotein (HDL) binding protein [Source:MGI Symbol;Acc:MGI:99256]	-	gene	overlapping	0	4.09279	4.10524	4.36907	3.64598
TCONS_00005981	1	93510274	93511916	-	2002-09-01	ENSMUSG00000026276	septin 2 [Source:MGI Symbol;Acc:MGI:97298]	+	gene	upstream	14	-0.171658	-0.883703	-0.800964	-0.60586
TCONS_00002033	1	93512079	93621972	+	Farp2	ENSMUSG00000034066	FERM, RhoGEF and pleckstrin domain protein 2 [Source:MGI Symbol;Acc:MGI:2385126]	+	gene	overlapping	0	5.63715	5.44634	5.32461	5.21607
TCONS_00005983	1	93621878	93658710	-	Farp2	ENSMUSG00000034066	FERM, RhoGEF and pleckstrin domain protein 2 [Source:MGI Symbol;Acc:MGI:2385126]	+	gene	overlapping	0	6.78266	7.07066	6.71522	6.70598
CUFF.1784.1	1	93657478	93665944	+	null					Not found	0	-0.504991	-0.883703	-0.750297	-0.60586
TCONS_00002045	1	93669982	93671310	+	null					Not found	0	-0.555659	-0.883703	-0.800964	-0.60586
TCONS_00002046	1	93685694	93695762	+	Bok	ENSMUSG00000026278	BCL2-related ovarian killer protein [Source:MGI Symbol;Acc:MGI:1858494]	+	gene	overlapping	0	-0.504991	-0.449034	-0.800964	-0.60586
TCONS_00005994	1	93705391	93754838	-	Thap4	ENSMUSG00000026279	THAP domain containing 4 [Source:MGI Symbol;Acc:MGI:1914276]	-	gene	overlapping	0	6.05776	6.20545	5.9953	6.17188
TCONS_00002047	1	93751490	93789434	+	Thap4	ENSMUSG00000026279	THAP domain containing 4 [Source:MGI Symbol;Acc:MGI:1914276]	-	gene	overlapping	0	6.651	6.72964	6.49412	6.75064
TCONS_00005995	1	93780634	93783495	-	Atg4b	ENSMUSG00000026280	autophagy-related 4B (yeast) [Source:MGI Symbol;Acc:MGI:1913865]	+	gene	overlapping	0	0.319653	-0.833035	2.18166	-0.60586
TCONS_00005996	1	93792576	93802122	-	Dtymk	ENSMUSG00000026281	deoxythymidylate kinase [Source:MGI Symbol;Acc:MGI:108396]	-	gene	overlapping	0	4.82058	4.87907	4.37964	4.64229
TCONS_00002050	1	93802049	93822101	+	Ing5	ENSMUSG00000026283	inhibitor of growth family, member 5 [Source:MGI Symbol;Acc:MGI:1922816]	+	gene	overlapping	0	4.56484	4.59139	4.67596	4.55455
TCONS_00002053	1	93825224	93852361	+	D2hgdh	ENSMUSG00000073609	D-2-hydroxyglutarate dehydrogenase [Source:MGI Symbol;Acc:MGI:2138209]	+	gene	overlapping	0	-0.555659	-0.782367	-0.800964	-0.60586
TCONS_00002057	1	93854460	94014437	+	Gal3st2	ENSMUSG00000094651	galactose-3-O-sulfotransferase 2 [Source:MGI Symbol;Acc:MGI:2685834]	+	gene	overlapping	0	1.56531	1.81625	2.20512	2.71607
TCONS_00005999	1	94038272	94052627	-	Pdcd1	ENSMUSG00000026285	programmed cell death 1 [Source:MGI Symbol;Acc:MGI:104879]	-	gene	overlapping	0	-0.555659	-0.499701	-0.750297	-0.453857
TCONS_00002073	1	94082450	94082805	+	null					Not found	0	-0.555659	-0.883703	-0.800964	-0.60586
TCONS_00002075	1	94332477	94461865	+	null					Not found	0	-0.555659	-0.883703	-0.750297	-0.60586
TCONS_00002096	1	94466735	94505183	+	null					Not found	0	-0.555659	-0.833035	-0.800964	-0.60586
TCONS_00006000	1	94469797	94469988	-	null					Not found	0	-0.555659	-0.304714	-0.699629	-0.60586
TCONS_00002098	1	94712970	94717386	+	null					Not found	0	-0.555659	-0.883703	-0.800964	-0.60586
TCONS_00002101	1	95169170	95170082	+	null					Not found	0	-0.555659	-0.883703	-0.800964	-0.60586
TCONS_00006001	1	95262236	95273200	-	null					Not found	0	1.06045	0.681739	0.162025	0.0461428
TCONS_00002102	1	95313628	95335284	+	Fam174a	ENSMUSG00000051185	family with sequence similarity 174, member A [Source:MGI Symbol;Acc:MGI:1914948]	+	gene	overlapping	0	1.56531	2.08811	3.28897	3.34981
TCONS_00006006	1	95537437	95541717	-	null					Not found	0	-0.555659	-0.883703	-0.800964	-0.60586
TCONS_00002105	1	95542925	95543807	+	null					Not found	0	-0.555659	-0.883703	-0.800964	-0.60586
TCONS_00006007	1	95562346	95565739	-	U7	ENSMUSG00000088333	U7 small nuclear RNA [Source:RFAM;Acc:RF00066]	-	gene	overlapping	0	2.76561	2.09892	-0.0329622	0.338624
TCONS_00002106	1	95565985	95572330	+	U7	ENSMUSG00000088333	U7 small nuclear RNA [Source:RFAM;Acc:RF00066]	-	gene	downstream	381	-0.555659	-0.883703	-0.800964	-0.60586
TCONS_00002114	1	95696794	95721535	+	null					Not found	0	0.212343	1.65828	-0.699629	1.33862
TCONS_00002119	1	95729939	95734170	+	null					Not found	0	-0.555659	-0.883703	-0.800964	-0.60586
TCONS_00002124	1	96118697	96119719	+	null					Not found	0	-0.555659	-0.883703	-0.800964	-0.60586
TCONS_00002125	1	96125223	96128535	+	null					Not found	0	-0.555659	-0.883703	-0.800964	-0.60586
TCONS_00006011	1	96629548	96630034	-	null					Not found	0	-0.555659	-0.883703	-0.800964	-0.60586
TCONS_00002127	1	96733616	96734417	+	null					Not found	0	-0.555659	-0.499701	-0.800964	-0.60586
TCONS_00006012	1	96735395	96736271	-	null					Not found	0	-0.555659	-0.883703	-0.800964	-0.60586
TCONS_00002128	1	96736435	96738416	+	null					Not found	0	-0.555659	-0.883703	-0.800964	-0.60586
TCONS_00006013	1	96816315	96872171	-	Slco4c1	ENSMUSG00000040693	solute carrier organic anion transporter family, member 4C1 [Source:MGI Symbol;Acc:MGI:2442784]	-	gene	overlapping	0	3.08145	2.76156	2.69183	4.3535
TCONS_00002131	1	96872221	96881230	+	Slco4c1	ENSMUSG00000040693	solute carrier organic anion transporter family, member 4C1 [Source:MGI Symbol;Acc:MGI:2442784]	-	gene	downstream	50	-0.555659	-0.883703	-0.800964	-0.60586
TCONS_00006014	1	96921925	96953158	-	Slco6b1	ENSMUSG00000090974	solute carrier organic anion transporter family, member 6b1 [Source:MGI Symbol;Acc:MGI:1915104]	-	gene	overlapping	0	-0.555659	-0.883703	-0.800964	-0.60586
TCONS_00006016	1	96960447	96968339	-	Slco6b1	ENSMUSG00000090974	solute carrier organic anion transporter family, member 6b1 [Source:MGI Symbol;Acc:MGI:1915104]	-	gene	overlapping	0	-0.555659	-0.883703	-0.800964	-0.60586
TCONS_00006020	1	96969086	96969664	-	Slco6b1	ENSMUSG00000090974	solute carrier organic anion transporter family, member 6b1 [Source:MGI Symbol;Acc:MGI:1915104]	-	gene	overlapping	0	-0.555659	-0.883703	-0.800964	-0.60586
TCONS_00002136	1	97196776	97198946	+	null					Not found	0	-0.555659	-0.883703	-0.800964	-0.60586
TCONS_00002138	1	97202838	97205676	+	null					Not found	0	-0.555659	-0.883703	-0.800964	-0.60586
TCONS_00002141	1	97301422	97318931	+	null					Not found	0	-0.555659	-0.304714	-0.800964	-0.60586
TCONS_00002142	1	97561988	97562878	+	null					Not found	0	-0.555659	-0.449034	-0.750297	-0.60586
TCONS_00006022	1	97572179	97572893	-	null					Not found	0	-0.555659	-0.883703	-0.800964	-0.60586
TCONS_00006024	1	97640179	97662074	-	D1Ertd622e	ENSMUSG00000044768	DNA segment, Chr 1, ERATO Doi 622, expressed [Source:MGI Symbol;Acc:MGI:1277184]	-	gene	overlapping	0	6.3099	6.11901	6.42926	6.09942
TCONS_00006030	1	97704677	97775450	-	Ppip5k2	ENSMUSG00000040648	diphosphoinositol pentakisphosphate kinase 2 [Source:MGI Symbol;Acc:MGI:2142810]	-	gene	overlapping	0	8.4103	8.25806	7.9652	7.63421
TCONS_00002143	1	97770165	97793006	+	Ppip5k2	ENSMUSG00000040648	diphosphoinositol pentakisphosphate kinase 2 [Source:MGI Symbol;Acc:MGI:2142810]	-	gene	overlapping	0	3.44707	3.48741	3.99413	2.83862
TCONS_00006041	1	97821090	98095811	-	Pam	ENSMUSG00000026335	peptidylglycine alpha-amidating monooxygenase [Source:MGI Symbol;Acc:MGI:97475]	-	gene	overlapping	0	1.98632	2.79662	2.01582	2.92359
TCONS_00002146	1	97993463	98001976	+	Pam	ENSMUSG00000026335	peptidylglycine alpha-amidating monooxygenase [Source:MGI Symbol;Acc:MGI:97475]	-	gene	overlapping	0	0.268985	0.41262	0.495359	1.99959
TCONS_00002149	1	98138072	98138556	+	null					Not found	0	-0.555659	-0.883703	-0.800964	-0.60586
TCONS_00002150	1	98457768	98459453	+	Slco6d1	ENSMUSG00000026336	solute carrier organic anion transporter family, member 6d1 [Source:MGI Symbol;Acc:MGI:1918116]	+	gene	overlapping	0	-0.171658	0.10275	-0.750297	-0.529859
TCONS_00002152	1	98692893	98695527	+	null					Not found	0	-0.555659	-0.883703	-0.800964	-0.60586
TCONS_00006047	1	98817536	98823294	-	null					Not found	0	0.0739973	3.39041	1.56566	3.83862
TCONS_00002154	1	99129324	99136783	+	null					Not found	0	-0.555659	-0.833035	-0.800964	-0.60586
TCONS_00002157	1	99151622	99159518	+	null					Not found	0	-0.555659	-0.883703	-0.800964	-0.529859
TCONS_00006048	1	99161261	99161823	-	null					Not found	0	-0.555659	-0.883703	0.0177054	-0.60586
TCONS_00002161	1	99791155	99792251	+	Cntnap5b	ENSMUSG00000067028	contactin associated protein-like 5B [Source:MGI Symbol;Acc:MGI:3664583]	+	gene	overlapping	0	-0.555659	-0.883703	-0.800964	-0.60586
TCONS_00006051	1	99910715	99967050	-	Cntnap5b	ENSMUSG00000067028	contactin associated protein-like 5B [Source:MGI Symbol;Acc:MGI:3664583]	+	gene	overlapping	0	-0.555659	-0.833035	-0.750297	-0.0298587
TCONS_00006068	1	99967460	99979239	-	Cntnap5b	ENSMUSG00000067028	contactin associated protein-like 5B [Source:MGI Symbol;Acc:MGI:3664583]	+	gene	overlapping	0	0.212343	-0.1157	0.40768	1.63111
TCONS_00002171	1	100647902	100863666	+	AC111074.1	ENSMUSG00000077039	No description	+	gene	overlapping	0	0.263011	0.129955	0.546026	0.262622
TCONS_00006070	1	101126382	101128076	-	null					Not found	0	0.602318	2.57805	0.569489	5.09779
TCONS_00006072	1	101988596	101988883	-	null					Not found	0	-0.555659	-0.883703	-0.800964	-0.60586
TCONS_00002192	1	102075695	102082376	+	null					Not found	0	-0.171658	-0.883703	-0.800964	-0.60586
TCONS_00002197	1	102085667	102086129	+	null					Not found	0	-0.555659	-0.883703	-0.800964	-0.60586
TCONS_00002198	1	102149838	102150242	+	null					Not found	0	-0.555659	-0.883703	-0.800964	-0.60586
TCONS_00006077	1	102307294	102308309	-	null					Not found	0	-0.555659	-0.883703	-0.800964	-0.60586
TCONS_00006078	1	102886418	102909481	-	null					Not found	0	-0.555659	-0.883703	-0.800964	-0.60586
TCONS_00002207	1	103154956	103197013	+	null					Not found	0	-0.504991	0.708943	-0.315628	0.838624
TCONS_00006086	1	103252168	103254447	-	null					Not found	0	-0.555659	-0.883703	-0.800964	-0.60586
TCONS_00006088	1	103767322	103768263	-	null					Not found	0	-0.555659	-0.883703	-0.800964	-0.60586
TCONS_00002218	1	103844641	103844709	+	null					Not found	0	-0.555659	-0.883703	-0.800964	-0.60586
TCONS_00006093	1	104026618	104036653	-	null					Not found	0	-0.555659	-0.883703	-0.800964	-0.60586
TCONS_00002220	1	104156873	104159683	+	null					Not found	0	-0.555659	-0.883703	-0.800964	-0.60586
TCONS_00002223	1	104372630	104382798	+	null					Not found	0	-0.555659	-0.883703	-0.800964	-0.60586
TCONS_00002227	1	104389052	104397248	+	null					Not found	0	-0.555659	-0.883703	-0.750297	-0.60586
TCONS_00002230	1	104399669	104426678	+	null					Not found	0	-0.555659	-0.0650327	-0.800964	-0.60586
TCONS_00006095	1	104401787	104403873	-	null					Not found	0	-0.555659	-0.883703	-0.800964	-0.60586
TCONS_00006096	1	104558305	104584078	-	null					Not found	0	0.0233297	0.0792871	0.162025	-0.60586
TCONS_00006110	1	104644786	104658535	-	null					Not found	0	1.51464	2.14475	0.653336	1.63111
TCONS_00002246	1	104736735	104740152	+	null					Not found	0	-0.171658	-0.833035	-0.800964	-0.60586
TCONS_00002248	1	104768529	104995481	+	Cdh20	ENSMUSG00000050840	cadherin 20 [Source:MGI Symbol;Acc:MGI:1346069]	+	gene	overlapping	0	3.64541	3.17519	2.85364	3.49959
NOMERGE_TCONS_00000061	1	104911431	104912333	-	Cdh20	ENSMUSG00000050840	cadherin 20 [Source:MGI Symbol;Acc:MGI:1346069]	+	gene	overlapping	0	-0.555659	-0.883703	-0.800964	-0.60586
TCONS_00006112	1	105276917	105356710	-	Rnf152	ENSMUSG00000047496	ring finger protein 152 [Source:MGI Symbol;Acc:MGI:2443787]	-	gene	overlapping	0	1.458	1.37561	2.39413	-0.0298587
TCONS_00002253	1	105356007	105361624	+	Rnf152	ENSMUSG00000047496	ring finger protein 152 [Source:MGI Symbol;Acc:MGI:2443787]	-	gene	overlapping	0	-0.555659	-0.883703	-0.800964	-0.60586
TCONS_00006113	1	105382243	105382638	-	null					Not found	0	-0.555659	-0.883703	-0.800964	-0.60586
TCONS_00006114	1	105490059	105490456	-	null					Not found	0	-0.555659	-0.883703	-0.800964	-0.60586
TCONS_00002256	1	105490855	105491055	+	null					Not found	0	-0.555659	-0.883703	-0.800964	-0.60586
TCONS_00002257	1	105507873	105508339	+	null					Not found	0	-0.555659	-0.883703	-0.800964	-0.60586
TCONS_00006117	1	105518310	105663721	-	Pign	ENSMUSG00000056536	phosphatidylinositol glycan anchor biosynthesis, class N [Source:MGI Symbol;Acc:MGI:1351629]	-	gene	overlapping	0	3.84825	3.73986	3.04331	4.20485
CUFF.1930.1	1	105615288	105615417	+	Pign	ENSMUSG00000056536	phosphatidylinositol glycan anchor biosynthesis, class N [Source:MGI Symbol;Acc:MGI:1351629]	-	gene	overlapping	0	-0.555659	-0.883703	-0.800964	-0.60586
TCONS_00002259	1	105618381	105631667	+	Pign	ENSMUSG00000056536	phosphatidylinositol glycan anchor biosynthesis, class N [Source:MGI Symbol;Acc:MGI:1351629]	-	gene	overlapping	0	-0.555659	-0.833035	-0.750297	-0.60586
TCONS_00002261	1	105663844	105755131	+	2310035C23Rik	ENSMUSG00000026319	RIKEN cDNA 2310035C23 gene [Source:MGI Symbol;Acc:MGI:1922832]	+	gene	overlapping	0	4.94053	5.14029	5.27458	5.71551
TCONS_00002265	1	105780723	105847981	+	Tnfrsf11a	ENSMUSG00000026321	tumor necrosis factor receptor superfamily, member 11a [Source:MGI Symbol;Acc:MGI:1314891]	+	gene	overlapping	0	-0.555659	-0.883703	-0.800964	-0.60586
TCONS_00006127	1	105863936	105875214	-	null					Not found	0	0.532129	2.61643	1.32	2.49959
TCONS_00002266	1	105912588	105912820	+	null					Not found	0	-0.555659	-0.883703	-0.800964	-0.60586
TCONS_00002268	1	105990324	106036788	+	Zcchc2	ENSMUSG00000038866	zinc finger, CCHC domain containing 2 [Source:MGI Symbol;Acc:MGI:2444114]	+	gene	overlapping	0	7.43936	7.81572	7.81	7.66298
TCONS_00002273	1	106088613	106098817	+	null					Not found	0	-0.555659	-0.1157	-0.416963	2.94982
TCONS_00002275	1	106103685	106104092	+	null					Not found	0	-0.555659	-0.883703	-0.800964	-0.0298587
TCONS_00002276	1	106171703	106394250	+	Phlpp1	ENSMUSG00000044340	PH domain and leucine rich repeat protein phosphatase 1 [Source:MGI Symbol;Acc:MGI:2138327]	+	gene	overlapping	0	2.99378	1.83972	2.61149	2.13111
TCONS_00002281	1	106445984	106459118	+	null					Not found	0	-0.555659	-0.883703	-0.800964	-0.60586
TCONS_00002287	1	106462074	106462548	+	null					Not found	0	-0.555659	-0.883703	-0.800964	-0.60586
TCONS_00002288	1	106518048	106519354	+	null					Not found	0	-0.555659	-0.883703	-0.800964	-0.60586
TCONS_00002289	1	106523998	106532627	+	null					Not found	0	-0.555659	-0.883703	-0.750297	-0.0298587
TCONS_00006134	1	106538178	106714291	-	Bcl2	ENSMUSG00000057329	B cell leukemia/lymphoma 2 [Source:MGI Symbol;Acc:MGI:88138]	-	gene	overlapping	0	-0.171658	-0.833035	-0.750297	-0.60586
CUFF.1940.1	1	106687973	106690666	+	Bcl2	ENSMUSG00000057329	B cell leukemia/lymphoma 2 [Source:MGI Symbol;Acc:MGI:88138]	-	gene	overlapping	0	-0.555659	-0.833035	-0.750297	-0.60586
TCONS_00006135	1	106720410	106759800	-	Kdsr	ENSMUSG00000009905	3-ketodihydrosphingosine reductase [Source:MGI Symbol;Acc:MGI:1918000]	-	gene	overlapping	0	2.74675	3.00722	2.56566	2.77586
TCONS_00006139	1	106764308	106796758	-	Vps4b	ENSMUSG00000009907	vacuolar protein sorting 4b (yeast) [Source:MGI Symbol;Acc:MGI:1100499]	-	gene	overlapping	0	4.85265	4.90035	4.9493	5.3306
TCONS_00006141	1	106925593	106936194	-	Serpinb12	ENSMUSG00000059956	serine (or cysteine) peptidase inhibitor, clade B (ovalbumin), member 12 [Source:MGI Symbol;Acc:MGI:1919119]	+	gene	overlapping	0	-0.504991	-0.499701	-0.699629	1.33862
TCONS_00002292	1	106933821	106958501	+	Serpinb12	ENSMUSG00000059956	serine (or cysteine) peptidase inhibitor, clade B (ovalbumin), member 12 [Source:MGI Symbol;Acc:MGI:1919119]	+	gene	overlapping	0	4.20691	5.27875	3.71026	5.06113
TCONS_00006142	1	107020137	107067581	-	Serpinb3a	ENSMUSG00000044594	serine (or cysteine) peptidase inhibitor, clade B (ovalbumin), member 3A [Source:MGI Symbol;Acc:MGI:3573933]	-	gene	overlapping	0	1.9221	4.28242	2.63496	5.53746
TCONS_00006148	1	107475082	107475812	-	null					Not found	0	-0.555659	-0.883703	-0.800964	-0.60586
TCONS_00006149	1	107520334	107522555	-	Serpinb2	ENSMUSG00000062345	serine (or cysteine) peptidase inhibitor, clade B, member 2 [Source:MGI Symbol;Acc:MGI:97609]	+	gene	overlapping	0	-0.504991	-0.883703	-0.800964	-0.60586
TCONS_00006151	1	107558893	107559391	-	null					Not found	0	-0.555659	-0.883703	-0.800964	-0.60586
TCONS_00002302	1	107589912	107608940	+	Serpinb8	ENSMUSG00000026315	serine (or cysteine) peptidase inhibitor, clade B, member 8 [Source:MGI Symbol;Acc:MGI:894657]	+	gene	overlapping	0	2.23197	0.486751	2.04331	1.70711
TCONS_00002304	1	107636494	107639308	+	null					Not found	0	0.986319	-0.254046	-0.416963	1.04614
TCONS_00002306	1	107686979	107693514	+	Gm15389	ENSMUSG00000086161	predicted gene 15389 [Source:MGI Symbol;Acc:MGI:3705287]	+	gene	overlapping	0	2.50109	4.07443	1.56566	5.28704
TCONS_00002307	1	107872713	107879920	+	null					Not found	0	-0.555659	-0.833035	-0.800964	-0.60586
TCONS_00002308	1	107891931	107896032	+	SNORA17	ENSMUSG00000077237	Small nucleolar RNA SNORA17 [Source:RFAM;Acc:RF00560]	+	gene	overlapping	0	-0.555659	-0.883703	-0.800964	-0.60586
TCONS_00002311	1	107896110	107901758	+	null					Not found	0	-0.555659	-0.883703	-0.800964	-0.60586
TCONS_00002317	1	107996501	108034365	+	null					Not found	0	-0.555659	-0.782367	-0.800964	-0.0298587
TCONS_00002324	1	108056359	108056848	+	null					Not found	0	-0.555659	-0.883703	-0.800964	-0.60586
TCONS_00006154	1	108316403	108320482	-	null					Not found	0	-0.555659	-0.883703	-0.800964	-0.60586
TCONS_00006156	1	108373494	108379938	-	null					Not found	0	2.39378	3.80485	2.40768	4.75296
TCONS_00006162	1	108992427	109000562	-	null					Not found	0	-0.555659	-0.782367	-0.800964	-0.60586
TCONS_00006164	1	109484498	109484746	-	null					Not found	0	-0.555659	-0.883703	-0.800964	-0.60586
TCONS_00006168	1	109938929	109942584	-	null					Not found	0	-0.555659	-0.883703	-0.800964	-0.60586
TCONS_00002332	1	109982710	110140157	+	Cdh7	ENSMUSG00000026312	cadherin 7, type 2 [Source:MGI Symbol;Acc:MGI:2442792]	+	gene	overlapping	0	-0.555659	-0.883703	-0.800964	-0.453857
TCONS_00002336	1	110647329	110652699	+	null					Not found	0	-0.555659	-0.883703	-0.800964	-0.60586
TCONS_00002338	1	110660304	110663240	+	null					Not found	0	-0.555659	-0.499701	-0.800964	-0.453857
TCONS_00006171	1	110671328	110672210	-	null					Not found	0	-0.555659	-0.883703	-0.800964	-0.60586
TCONS_00002339	1	110701377	110701475	+	null					Not found	0	-0.555659	-0.883703	-0.800964	-0.60586
TCONS_00006174	1	110887723	110977372	-	Cdh19	ENSMUSG00000047216	cadherin 19, type 2 [Source:MGI Symbol;Acc:MGI:3588198]	-	gene	overlapping	0	2.37032	2.90693	2.61149	2.83862
TCONS_00006180	1	111223730	111225796	-	null					Not found	0	-0.555659	-0.883703	-0.800964	-0.60586
TCONS_00006183	1	111228576	111239242	-	null					Not found	0	-0.504991	-0.883703	-0.750297	-0.60586
TCONS_00002340	1	111490908	111494237	+	null					Not found	0	-0.504991	-0.499701	-0.0836299	0.0461428
TCONS_00006187	1	111597092	111597599	-	null					Not found	0	-0.555659	-0.883703	-0.800964	-0.60586
TCONS_00002344	1	111730267	111733381	+	null					Not found	0	-0.555659	-0.833035	-0.800964	-0.60586
TCONS_00006189	1	111854025	111855208	-	null					Not found	0	-0.555659	-0.883703	-0.800964	-0.60586
TCONS_00006191	1	111858656	111864954	-	Dsel	ENSMUSG00000038702	dermatan sulfate epimerase-like [Source:MGI Symbol;Acc:MGI:2442948]	-	gene	overlapping	0	0.652986	1.39907	2.0608	2.61078
TCONS_00002345	1	111884610	111885218	+	null					Not found	0	-0.555659	-0.883703	-0.800964	-0.60586
TCONS_00006192	1	111979210	111981722	-	null					Not found	0	-0.555659	-0.883703	-0.800964	-0.60586
TCONS_00006194	1	112028447	112028900	-	null					Not found	0	-0.555659	-0.883703	-0.800964	-0.60586
TCONS_00006195	1	112038601	112040061	-	null					Not found	0	-0.555659	-0.883703	-0.800964	-0.60586
TCONS_00002350	1	112627601	112628465	+	null					Not found	0	-0.555659	-0.883703	-0.800964	-0.60586
TCONS_00002351	1	112765543	112771970	+	null					Not found	0	-0.555659	-0.833035	-0.800964	-0.60586
TCONS_00006199	1	113265412	113331458	-	null					Not found	0	-0.555659	-0.883703	-0.800964	-0.60586
TCONS_00006202	1	113680335	113681080	-	null					Not found	0	-0.555659	-0.883703	-0.800964	-0.60586
TCONS_00006205	1	113684372	113688757	-	null					Not found	0	-0.555659	-0.883703	-0.750297	-0.60586
TCONS_00006206	1	113691315	113693072	-	null					Not found	0	-0.555659	-0.833035	-0.800964	-0.60586
TCONS_00002356	1	113741055	113742174	+	null					Not found	0	-0.555659	-0.883703	-0.800964	-0.60586
TCONS_00006207	1	113891385	113964134	-	null					Not found	0	-0.555659	-0.883703	-0.800964	-0.60586
TCONS_00002358	1	114521264	114525371	+	null					Not found	0	-0.555659	-0.883703	-0.800964	-0.529859
TCONS_00002362	1	114775441	114777082	+	null					Not found	0	-0.555659	-0.883703	-0.800964	-0.60586
TCONS_00002364	1	114795873	114798480	+	null					Not found	0	-0.12099	0.268301	-0.800964	-0.529859
TCONS_00006210	1	114795931	114796156	-	null					Not found	0	-0.555659	-0.883703	-0.800964	-0.60586
TCONS_00002366	1	114809331	114814135	+	null					Not found	0	-0.171658	-0.883703	-0.366296	-0.60586
TCONS_00002368	1	114815553	114861365	+	null					Not found	0	3.57522	3.60152	3.06677	4.06423
TCONS_00002375	1	115384823	115401066	+	null					Not found	0	-0.504991	0.601634	-0.0329623	-0.0298587
TCONS_00002383	1	115684756	116583317	+	Cntnap5a	ENSMUSG00000070695	contactin associated protein-like 5A [Source:MGI Symbol;Acc:MGI:3643623]	+	gene	overlapping	0	-0.12099	-0.449034	-0.800964	1.63111
TCONS_00002388	1	116746718	116746949	+	null					Not found	0	-0.555659	-0.883703	-0.800964	-0.60586
TCONS_00002389	1	116803092	116823599	+	AC132379.1	ENSMUSG00000094429	No description	+	gene	overlapping	0	0.0233296	0.129955	-0.12064	0.470141
TCONS_00002391	1	117089202	117093485	+	null					Not found	0	-0.171658	2.32494	-0.800964	0.546143
TCONS_00002393	1	117247809	117248880	+	null					Not found	0	-0.555659	-0.883703	-0.800964	-0.60586
TCONS_00006215	1	117488404	117488668	-	null					Not found	0	-0.555659	-0.883703	-0.221976	-0.60586
TCONS_00002395	1	117603693	117604276	+	null					Not found	0	2.16776	2.36804	1.23232	1.33862
TCONS_00002397	1	117605983	117628546	+	null					Not found	0	4.38512	3.82622	4.14727	4.17129
TCONS_00006216	1	117628439	117629171	-	null					Not found	0	-0.555659	-0.883703	-0.800964	-0.60586
TCONS_00006217	1	117631576	117632195	-	null					Not found	0	-0.555659	-0.883703	-0.800964	-0.60586
TCONS_00006220	1	117657573	117658044	-	null					Not found	0	-0.555659	-0.883703	-0.800964	-0.60586
TCONS_00002398	1	117658194	117664664	+	null					Not found	0	3.77993	3.55339	3.73344	4.06834
TCONS_00002402	1	117677553	117678145	+	null					Not found	0	-0.555659	-0.883703	-0.800964	-0.60586
TCONS_00006222	1	117677755	117679121	-	null					Not found	0	-0.555659	-0.883703	-0.800964	-0.60586
TCONS_00006225	1	117708964	117711471	-	null					Not found	0	-0.555659	-0.883703	-0.800964	-0.60586
TCONS_00006228	1	117713936	117718335	-	null					Not found	0	-0.555659	-0.883703	-0.800964	-0.60586
TCONS_00006229	1	117723748	117736085	-	null					Not found	0	-0.555659	-0.883703	-0.750297	-0.60586
TCONS_00002404	1	117727765	117728445	+	null					Not found	0	-0.555659	-0.883703	-0.800964	-0.60586
TCONS_00002405	1	117739231	117739868	+	null					Not found	0	-0.555659	-0.883703	-0.800964	-0.529859
TCONS_00002406	1	117741375	117803363	+	null					Not found	0	3.46669	3.01721	4.10143	3.53478
CUFF.2089.1	1	117748363	117749174	-	null					Not found	0	-0.555659	-0.883703	-0.800964	-0.60586
TCONS_00002413	1	117830059	117830633	+	null					Not found	0	-0.555659	-0.883703	-0.800964	-0.60586
TCONS_00002414	1	117853430	117854335	+	null					Not found	0	-0.555659	-0.883703	-0.800964	-0.60586
TCONS_00002415	1	117866741	117867896	+	null					Not found	0	-0.555659	-0.883703	-0.800964	-0.60586
TCONS_00002416	1	117869307	117900267	+	null					Not found	0	-0.555659	-0.304714	-0.800964	-0.0298587
TCONS_00002417	1	117948607	117949976	+	null					Not found	0	-0.555659	-0.833035	-0.800964	-0.60586
TCONS_00002418	1	117965692	117966352	+	null					Not found	0	1.37032	2.0347	0.684372	0.873819
TCONS_00002420	1	117967930	117988075	+	null					Not found	0	3.91344	3.16656	4.19243	4.45303
TCONS_00002424	1	118010033	118012334	+	null					Not found	0	-0.504991	-0.883703	-0.750297	-0.60586
TCONS_00002427	1	118031059	118048941	+	null					Not found	0	-0.555659	-0.883703	-0.800964	-0.529859
TCONS_00002429	1	118062330	118063035	+	null					Not found	0	-0.555659	-0.883703	-0.800964	-0.60586
TCONS_00006230	1	118076456	118077374	-	null					Not found	0	-0.555659	-0.883703	-0.800964	-0.60586
TCONS_00006231	1	118081540	118082647	-	null					Not found	0	-0.555659	-0.883703	-0.800964	-0.60586
TCONS_00002430	1	118083108	118083665	+	null					Not found	0	-0.555659	-0.883703	-0.800964	-0.60586
TCONS_00002431	1	118096190	118096912	+	null					Not found	0	-0.555659	-0.883703	-0.800964	-0.60586
TCONS_00002433	1	118129728	118130293	+	null					Not found	0	-0.555659	-0.883703	-0.800964	-0.60586
TCONS_00002434	1	118176508	118176923	+	null					Not found	0	0.212343	-0.1157	-0.699629	0.546143
TCONS_00002435	1	118178292	118202418	+	null					Not found	0	3.31208	3.18325	3.34632	3.90327
TCONS_00006233	1	118204235	118205258	-	null					Not found	0	-0.555659	-0.883703	-0.800964	-0.60586
TCONS_00006234	1	118265673	118311411	-	Tsn	ENSMUSG00000026374	translin [Source:MGI Symbol;Acc:MGI:109263]	-	gene	overlapping	0	4.81331	5.15452	4.71942	4.98823
TCONS_00002436	1	118321701	118335886	+	Mki67ip	ENSMUSG00000026377	Mki67 (FHA domain) interacting nucleolar phosphoprotein [Source:MGI Symbol;Acc:MGI:1915199]	+	gene	overlapping	0	6.97751	6.75224	6.61235	6.58954
TCONS_00006241	1	118388075	118388878	-	Clasp1	ENSMUSG00000064302	CLIP associating protein 1 [Source:MGI Symbol;Acc:MGI:1923957]	+	gene	downstream	180	-0.555659	-0.883703	-0.800964	-0.60586
TCONS_00002441	1	118388947	118609463	+	Clasp1	ENSMUSG00000064302	CLIP associating protein 1 [Source:MGI Symbol;Acc:MGI:1923957]	+	gene	overlapping	0	7.23432	7.23841	7.17406	6.79407
CUFF.2170.1	1	118424984	118427087	-	Clasp1	ENSMUSG00000064302	CLIP associating protein 1 [Source:MGI Symbol;Acc:MGI:1923957]	+	gene	overlapping	0	-0.555659	-0.883703	-0.800964	-0.60586
ENSMUST00000116892	1	118459141	118459265	-	Clasp1	ENSMUSG00000064302	CLIP associating protein 1 [Source:MGI Symbol;Acc:MGI:1923957]	+	gene	overlapping	0	-0.555659	-0.883703	-0.800964	-0.60586
TCONS_00002450	1	118627918	118685167	+	Tfcp2l1	ENSMUSG00000026380	transcription factor CP2-like 1 [Source:MGI Symbol;Acc:MGI:2444691]	+	gene	overlapping	0	1.7603	0.570597	0.87936	-0.0298587
TCONS_00006246	1	118834132	119053619	-	Gli2	ENSMUSG00000048402	GLI-Kruppel family member GLI2 [Source:MGI Symbol;Acc:MGI:95728]	-	gene	overlapping	0	4.78479	2.70137	4.94824	4.00408
TCONS_00002455	1	119305393	119320740	+	null					Not found	0	-0.555659	-0.782367	-0.800964	-0.60586
TCONS_00006252	1	119415465	119422248	-	Inhbb	ENSMUSG00000037035	inhibin beta-B [Source:MGI Symbol;Acc:MGI:96571]	-	gene	overlapping	0	1.31965	0.37561	0.185488	1.33862
TCONS_00006253	1	119470305	119504794	-	Ralb	ENSMUSG00000004451	v-ral simian leukemia viral oncogene homolog B (ras related) [Source:MGI Symbol;Acc:MGI:1927244]	-	gene	overlapping	0	-0.555659	-0.833035	-0.750297	-0.60586
TCONS_00002457	1	119526109	119528277	+	U6	ENSMUSG00000084505	U6 spliceosomal RNA [Source:RFAM;Acc:RF00026]	+	gene	downstream	1934	0.847973	-0.203379	-0.0329623	-0.529859
TCONS_00006256	1	119545051	119579189	-	Epb4.1l5	ENSMUSG00000026383	erythrocyte protein band 4.1-like 5 [Source:MGI Symbol;Acc:MGI:103006]	-	gene	overlapping	0	1.1443	1.79662	1.65334	0.546143
TCONS_00002458	1	119562089	119564072	+	Epb4.1l5	ENSMUSG00000026383	erythrocyte protein band 4.1-like 5 [Source:MGI Symbol;Acc:MGI:103006]	-	gene	overlapping	0	-0.555659	-0.883703	-0.800964	-0.60586
TCONS_00002459	1	119581661	119586142	+	Epb4.1l5	ENSMUSG00000026383	erythrocyte protein band 4.1-like 5 [Source:MGI Symbol;Acc:MGI:103006]	-	gene	overlapping	0	-0.555659	-0.883703	-0.800964	-0.60586
TCONS_00006261	1	119586184	119649002	-	Epb4.1l5	ENSMUSG00000026383	erythrocyte protein band 4.1-like 5 [Source:MGI Symbol;Acc:MGI:103006]	-	gene	overlapping	0	7.16658	7.13925	7.12248	7.13666
TCONS_00006265	1	119652477	119837613	-	Ptpn4	ENSMUSG00000026384	protein tyrosine phosphatase, non-receptor type 4 [Source:MGI Symbol;Acc:MGI:1099792]	-	gene	overlapping	0	1.67262	2.88555	2.47315	3.2293
CUFF.2160.1	1	119703704	119706121	+	Ptpn4	ENSMUSG00000026384	protein tyrosine phosphatase, non-receptor type 4 [Source:MGI Symbol;Acc:MGI:1099792]	-	gene	overlapping	0	4.68902	3.92861	5.18856	5.11592
TCONS_00006267	1	119889400	119895148	-	null					Not found	0	-0.555659	-0.883703	-0.800964	-0.529859
TCONS_00006268	1	119907890	119913208	-	Tmem177	ENSMUSG00000036975	transmembrane protein 177 [Source:MGI Symbol;Acc:MGI:1913593]	-	gene	overlapping	0	-0.555659	-0.883703	-0.416963	-0.60586
TCONS_00006269	1	119923341	119997234	-	Gm101	ENSMUSG00000036962	predicted gene 101 [Source:MGI Symbol;Acc:MGI:2684947]	-	gene	overlapping	0	3.94539	3.49772	3.45647	3.39636
NOMERGE_TCONS_00000024	1	119986795	119987314	+	Gm101	ENSMUSG00000036962	predicted gene 101 [Source:MGI Symbol;Acc:MGI:2684947]	-	gene	overlapping	0	-0.555659	-0.883703	-0.800964	-0.60586
TCONS_00006289	1	120067377	120089305	-	Tmem37	ENSMUSG00000050777	transmembrane protein 37 [Source:MGI Symbol;Acc:MGI:2157899]	-	gene	overlapping	0	-0.504991	0.570597	-0.750297	0.0461428
TCONS_00002462	1	120085912	120093333	+	null					Not found	0	0.212343	-0.883703	-0.699629	-0.60586
TCONS_00006294	1	120103765	120106049	-	null					Not found	0	-0.555659	-0.883703	-0.800964	-0.60586
TCONS_00002465	1	120105354	120105898	+	null					Not found	0	-0.555659	-0.883703	-0.800964	-0.60586
TCONS_00002466	1	120106235	120188192	+	Dbi	ENSMUSG00000026385	diazepam binding inhibitor [Source:MGI Symbol;Acc:MGI:94865]	-	gene	overlapping	0	5.24103	4.37514	5.65705	5.37368
TCONS_00006296	1	120113280	120121128	-	Dbi	ENSMUSG00000026385	diazepam binding inhibitor [Source:MGI Symbol;Acc:MGI:94865]	-	gene	overlapping	0	3.78929	3.48487	4.11515	4.6082
TCONS_00006297	1	120190757	120265284	-	Steap3	ENSMUSG00000026389	STEAP family member 3 [Source:MGI Symbol;Acc:MGI:1915678]	-	gene	overlapping	0	-0.555659	-0.883703	-0.800964	-0.60586
TCONS_00006301	1	120374236	120378598	-	null					Not found	0	-0.555659	-0.883703	-0.800964	-0.529859
TCONS_00002476	1	120435774	120440809	+	null					Not found	0	-0.555659	-0.883703	-0.800964	-0.60586
TCONS_00002479	1	120466325	120466760	+	null					Not found	0	-0.555659	-0.883703	-0.800964	-0.60586
TCONS_00006306	1	120474538	120508676	-	Marco	ENSMUSG00000026390	macrophage receptor with collagenous structure [Source:MGI Symbol;Acc:MGI:1309998]	-	gene	overlapping	0	3.15027	1.50178	2.98667	1.70711
TCONS_00002480	1	120506421	120525937	+	Marco	ENSMUSG00000026390	macrophage receptor with collagenous structure [Source:MGI Symbol;Acc:MGI:1309998]	-	gene	downstream	1337	-0.504991	-0.883703	-0.800964	-0.60586
TCONS_00006307	1	120551097	120553261	-	null					Not found	0	-0.555659	-0.883703	-0.800964	-0.60586
TCONS_00002485	1	120602418	120609296	+	En1	ENSMUSG00000058665	engrailed 1 [Source:MGI Symbol;Acc:MGI:95389]	+	gene	overlapping	0	-0.555659	-0.833035	-0.800964	-0.60586
TCONS_00006309	1	121045841	121049403	-	null					Not found	0	-0.555659	-0.883703	-0.750297	0.0461428
TCONS_00002486	1	121055652	121056334	+	null					Not found	0	-0.555659	-0.883703	-0.800964	-0.60586
TCONS_00006316	1	121304352	121332589	-	Insig2	ENSMUSG00000003721	insulin induced gene 2 [Source:MGI Symbol;Acc:MGI:1920249]	-	gene	overlapping	0	2.53213	1.51993	0.791681	2.7423
TCONS_00002487	1	121431023	121506460	+	Ccdc93	ENSMUSG00000026339	coiled-coil domain containing 93 [Source:MGI Symbol;Acc:MGI:1918079]	+	gene	overlapping	0	5.97027	5.43433	5.73832	4.77175
TCONS_00006318	1	121488966	121493203	-	Ccdc93	ENSMUSG00000026339	coiled-coil domain containing 93 [Source:MGI Symbol;Acc:MGI:1918079]	+	gene	overlapping	0	-0.555659	-0.833035	-0.699629	-0.60586
TCONS_00006322	1	121509655	121528489	-	Htr5b	ENSMUSG00000050534	5-hydroxytryptamine (serotonin) receptor 5B [Source:MGI Symbol;Acc:MGI:96284]	-	gene	overlapping	0	-0.12099	1.08811	-0.366296	1.49959
TCONS_00002494	1	121528677	121533322	+	Htr5b	ENSMUSG00000050534	5-hydroxytryptamine (serotonin) receptor 5B [Source:MGI Symbol;Acc:MGI:96284]	-	gene	downstream	212	-0.171658	-0.883703	-0.750297	-0.529859
TCONS_00002497	1	121542625	121543725	+	null					Not found	0	-0.555659	-0.883703	-0.800964	-0.60586
TCONS_00002498	1	121544294	121549414	+	null					Not found	0	-0.555659	-0.883703	-0.800964	-0.60586
TCONS_00002499	1	121552242	121553539	+	Ddx18	ENSMUSG00000001674	DEAD (Asp-Glu-Ala-Asp) box polypeptide 18 [Source:MGI Symbol;Acc:MGI:1914192]	-	gene	upstream	296	-0.555659	-0.883703	-0.800964	-0.60586
TCONS_00006324	1	121553835	121568015	-	Ddx18	ENSMUSG00000001674	DEAD (Asp-Glu-Ala-Asp) box polypeptide 18 [Source:MGI Symbol;Acc:MGI:1914192]	-	gene	overlapping	0	6.20433	5.948	5.9011	5.83862
TCONS_00002500	1	121638689	121640144	+	null					Not found	0	-0.504991	-0.883703	-0.648961	-0.60586
TCONS_00002502	1	121648483	121706288	+	null					Not found	0	-0.555659	-0.883703	-0.800964	-0.529859
TCONS_00002505	1	121910634	121938790	+	null					Not found	0	3.70365	4.223	3.6839	3.66055
TCONS_00002519	1	121944244	121944971	+	null					Not found	0	-0.555659	-0.883703	-0.800964	-0.60586
TCONS_00002520	1	121960076	121971447	+	null					Not found	0	-0.555659	-0.499701	-0.750297	-0.60586
TCONS_00002529	1	122075814	122080122	+	null					Not found	0	-0.555659	-0.883703	-0.800964	-0.60586
TCONS_00002530	1	122157165	122168113	+	null					Not found	0	-0.555659	-0.883703	-0.800964	-0.60586
TCONS_00006329	1	122193839	122193917	-	null					Not found	0	-0.555659	-0.883703	-0.800964	-0.60586
TCONS_00002531	1	122357135	122357243	+	null					Not found	0	-0.555659	-0.883703	-0.800964	-0.60586
TCONS_00006336	1	123332142	124045255	-	Dpp10	ENSMUSG00000036815	dipeptidylpeptidase 10 [Source:MGI Symbol;Acc:MGI:2442409]	-	gene	overlapping	0	4.91207	4.94883	5.29024	5.01886
TCONS_00002533	1	124306785	124307060	+	null					Not found	0	-0.555659	-0.883703	-0.800964	-0.60586
TCONS_00006338	1	124354439	124358159	-	null					Not found	0	-0.555659	-0.883703	-0.800964	-0.60586
TCONS_00002534	1	124358402	124375187	+	null					Not found	0	-0.504991	-0.449034	0.162025	-0.60586
TCONS_00002542	1	124548116	124549480	+	null					Not found	0	-0.555659	-0.883703	-0.800964	-0.529859
TCONS_00006339	1	124711656	124712343	-	null					Not found	0	-0.555659	-0.883703	-0.800964	-0.529859
TCONS_00006343	1	124989269	125000904	-	null					Not found	0	-0.555659	-0.833035	-0.800964	-0.529859
TCONS_00002547	1	125229956	125230449	+	null					Not found	0	-0.555659	-0.883703	-0.800964	-0.60586
TCONS_00002548	1	125242423	125243175	+	null					Not found	0	-0.555659	-0.883703	-0.800964	-0.60586
TCONS_00006346	1	125252442	125258469	-	null					Not found	0	-0.555659	-0.883703	-0.800964	-0.60586
TCONS_00006350	1	125392904	125436087	-	Actr3	ENSMUSG00000026341	ARP3 actin-related protein 3 homolog (yeast) [Source:MGI Symbol;Acc:MGI:1921367]	-	gene	overlapping	0	7.84559	7.72665	7.89227	7.73415
TCONS_00006351	1	125483227	125484389	-	null					Not found	0	-0.555659	-0.883703	-0.800964	-0.60586
TCONS_00002552	1	125483248	125484466	+	null					Not found	0	-0.555659	-0.883703	-0.800964	-0.60586
TCONS_00002554	1	125487619	125488183	+	null					Not found	0	-0.555659	-0.883703	-0.800964	-0.60586
TCONS_00002555	1	125515408	125515663	+	null					Not found	0	-0.555659	-0.883703	-0.800964	-0.60586
TCONS_00002556	1	125560616	125595825	+	Slc35f5	ENSMUSG00000026342	solute carrier family 35, member F5 [Source:MGI Symbol;Acc:MGI:1921400]	+	gene	overlapping	0	1.89864	0.934967	0.162025	0.338624
TCONS_00006354	1	125867622	125912928	-	Gpr39	ENSMUSG00000026343	G protein-coupled receptor 39 [Source:MGI Symbol;Acc:MGI:1918361]	+	gene	overlapping	0	-0.555659	-0.883703	-0.800964	-0.60586
TCONS_00006360	1	125913607	126738202	-	Nckap5	ENSMUSG00000049690	NCK-associated protein 5 [Source:MGI Symbol;Acc:MGI:2686394]	-	gene	overlapping	0	6.28318	5.73758	5.96817	5.86998
TCONS_00002558	1	126479722	126488607	+	Nckap5	ENSMUSG00000049690	NCK-associated protein 5 [Source:MGI Symbol;Acc:MGI:2686394]	-	gene	overlapping	0	-0.555659	-0.0650327	-0.800964	-0.529859
TCONS_00006367	1	127010750	127014160	-	null					Not found	0	-0.555659	-0.883703	-0.800964	-0.60586
TCONS_00006370	1	127014461	127106221	-	null					Not found	0	-0.504991	-0.883703	-0.800964	-0.60586
TCONS_00002561	1	127105266	127106018	+	null					Not found	0	-0.555659	-0.883703	-0.800964	-0.60586
TCONS_00002562	1	127204976	127488336	+	Mgat5	ENSMUSG00000036155	mannoside acetylglucosaminyltransferase 5 [Source:MGI Symbol;Acc:MGI:894701]	+	gene	overlapping	0	5.25356	5.36165	5.59742	5.1986
TCONS_00006373	1	127452835	127455315	-	Mgat5	ENSMUSG00000036155	mannoside acetylglucosaminyltransferase 5 [Source:MGI Symbol;Acc:MGI:894701]	+	gene	overlapping	0	-0.555659	-0.883703	-0.800964	-0.60586
TCONS_00006375	1	127484212	127493996	-	Tmem163	ENSMUSG00000026347	transmembrane protein 163 [Source:MGI Symbol;Acc:MGI:1919410]	-	gene	overlapping	0	-0.555659	-0.833035	-0.416963	-0.60586
CUFF.2242.1	1	127493974	127494922	+	Tmem163	ENSMUSG00000026347	transmembrane protein 163 [Source:MGI Symbol;Acc:MGI:1919410]	-	gene	overlapping	0	-0.555659	-0.833035	-0.800964	-0.529859
TCONS_00006377	1	127578406	127578798	-	Tmem163	ENSMUSG00000026347	transmembrane protein 163 [Source:MGI Symbol;Acc:MGI:1919410]	-	gene	overlapping	0	-0.555659	-0.883703	-0.800964	-0.60586
TCONS_00006378	1	127585103	127588201	-	Tmem163	ENSMUSG00000026347	transmembrane protein 163 [Source:MGI Symbol;Acc:MGI:1919410]	-	gene	overlapping	0	-0.504991	-0.883703	-0.800964	-0.60586
TCONS_00006379	1	127590216	127590824	-	Tmem163	ENSMUSG00000026347	transmembrane protein 163 [Source:MGI Symbol;Acc:MGI:1919410]	-	gene	overlapping	0	-0.555659	-0.883703	-0.800964	-0.60586
TCONS_00006380	1	127700863	127701256	-	null					Not found	0	-0.555659	-0.883703	-0.800964	-0.60586
TCONS_00002569	1	127710593	127713888	+	null					Not found	0	-0.555659	-0.499701	-0.800964	-0.60586
TCONS_00006382	1	127753614	127774111	-	Acmsd	ENSMUSG00000026348	amino carboxymuconate semialdehyde decarboxylase [Source:MGI Symbol;Acc:MGI:2386323]	+	gene	overlapping	0	-0.454323	-0.304714	0.495359	-0.0298587
TCONS_00002572	1	127774164	127808061	+	Ccnt2	ENSMUSG00000026349	cyclin T2 [Source:MGI Symbol;Acc:MGI:1920199]	+	gene	overlapping	0	7.38878	7.33447	7.34246	7.17671
TCONS_00006386	1	127863068	127866445	-	null					Not found	0	-0.555659	-0.833035	-0.800964	-0.60586
TCONS_00002573	1	127868620	127943868	+	Rab3gap1	ENSMUSG00000036104	RAB3 GTPase activating protein subunit 1 [Source:MGI Symbol;Acc:MGI:2445001]	+	gene	overlapping	0	9.44672	8.73779	9.44869	8.48729
TCONS_00006390	1	127954184	128103048	-	Zranb3	ENSMUSG00000036086	zinc finger, RAN-binding domain containing 3 [Source:MGI Symbol;Acc:MGI:1918362]	-	gene	overlapping	0	3.96411	3.43624	3.47296	3.54332
TCONS_00002577	1	128103257	128237735	+	R3hdm1	ENSMUSG00000056211	R3H domain 1 (binds single-stranded nucleic acids) [Source:MGI Symbol;Acc:MGI:2448514]	+	gene	overlapping	0	7.29038	7.51632	7.46942	7.54882
TCONS_00002585	1	128243855	128279377	+	Ubxn4	ENSMUSG00000026353	UBX domain protein 4 [Source:MGI Symbol;Acc:MGI:1915062]	+	gene	overlapping	0	9.24647	9.34456	9.09902	9.33094
TCONS_00006394	1	128284756	128328318	-	Lct	ENSMUSG00000026354	lactase [Source:MGI Symbol;Acc:MGI:104576]	-	gene	overlapping	0	2.54693	0.268301	2.20512	0.838624
TCONS_00006396	1	128331588	128359770	-	Mcm6	ENSMUSG00000026355	minichromosome maintenance deficient 6 (MIS5 homolog, S. pombe) (S. cerevisiae) [Source:MGI Symbol;Acc:MGI:1298227]	-	gene	overlapping	0	7.30517	7.04954	7.37408	7.32881
TCONS_00006398	1	128361418	128417432	-	Dars	ENSMUSG00000026356	aspartyl-tRNA synthetase [Source:MGI Symbol;Acc:MGI:2442544]	-	gene	overlapping	0	6.22184	5.99567	5.69461	6.01354
TCONS_00002591	1	128429273	128474013	+	null					Not found	0	-0.504991	-0.782367	-0.221976	-0.60586
TCONS_00006401	1	128479888	128480142	-	null					Not found	0	-0.555659	-0.883703	-0.800964	-0.60586
TCONS_00006403	1	128588199	128592343	-	Cxcr4	ENSMUSG00000045382	chemokine (C-X-C motif) receptor 4 [Source:MGI Symbol;Acc:MGI:109563]	-	gene	overlapping	0	0.263011	-0.883703	-0.800964	-0.60586
TCONS_00002592	1	128747349	128747673	+	null					Not found	0	-0.555659	-0.883703	-0.800964	-0.60586
TCONS_00006404	1	128770599	128774421	-	null					Not found	0	-0.555659	-0.883703	-0.800964	-0.60586
TCONS_00006406	1	129183747	129184465	-	null					Not found	0	-0.555659	-0.883703	-0.800964	-0.60586
TCONS_00002594	1	129273302	129629046	+	Thsd7b	ENSMUSG00000042581	thrombospondin, type I, domain containing 7B [Source:MGI Symbol;Acc:MGI:2443925]	+	gene	overlapping	0	-0.555659	-0.883703	-0.800964	-0.60586
TCONS_00006408	1	129596125	129600703	-	Thsd7b	ENSMUSG00000042581	thrombospondin, type I, domain containing 7B [Source:MGI Symbol;Acc:MGI:2443925]	+	gene	overlapping	0	-0.555659	-0.499701	-0.800964	-0.60586
TCONS_00006409	1	129796608	129797858	-	Thsd7b	ENSMUSG00000042581	thrombospondin, type I, domain containing 7B [Source:MGI Symbol;Acc:MGI:2443925]	+	gene	overlapping	0	3.10843	3.27041	2.04331	2.61078
TCONS_00006411	1	129837856	129838647	-	Thsd7b	ENSMUSG00000042581	thrombospondin, type I, domain containing 7B [Source:MGI Symbol;Acc:MGI:2443925]	+	gene	overlapping	0	-0.555659	-0.883703	-0.800964	-0.60586
TCONS_00006413	1	129897622	129914529	-	Thsd7b	ENSMUSG00000042581	thrombospondin, type I, domain containing 7B [Source:MGI Symbol;Acc:MGI:2443925]	+	gene	overlapping	0	-0.171658	-0.782367	-0.750297	-0.60586
TCONS_00002596	1	129915539	130184122	+	Thsd7b	ENSMUSG00000042581	thrombospondin, type I, domain containing 7B [Source:MGI Symbol;Acc:MGI:2443925]	+	gene	overlapping	0	4.5326	4.88142	4.50512	5.1095
TCONS_00006414	1	130187973	130188279	-	Thsd7b	ENSMUSG00000042581	thrombospondin, type I, domain containing 7B [Source:MGI Symbol;Acc:MGI:2443925]	+	gene	overlapping	0	-0.555659	-0.883703	-0.800964	-0.60586
TCONS_00002597	1	130188362	130195393	+	Thsd7b	ENSMUSG00000042581	thrombospondin, type I, domain containing 7B [Source:MGI Symbol;Acc:MGI:2443925]	+	gene	overlapping	0	-0.555659	-0.883703	-0.750297	0.546143
TCONS_00002598	1	130306631	130308849	+	null					Not found	0	-0.555659	-0.883703	-0.800964	-0.60586
TCONS_00006417	1	130382322	130386271	-	null					Not found	0	-0.555659	-0.883703	-0.750297	-0.60586
TCONS_00006418	1	130388630	130422831	-	Daf2	ENSMUSG00000026401	decay accelerating factor 2 [Source:MGI Symbol;Acc:MGI:104849]	-	gene	overlapping	0	3.85666	3.89092	3.87393	3.24658
NOMERGE_TCONS_00000025	1	130422824	130437914	+	Daf2	ENSMUSG00000026401	decay accelerating factor 2 [Source:MGI Symbol;Acc:MGI:104849]	-	gene	overlapping	0	-0.555659	-0.833035	-0.800964	-0.60586
TCONS_00006424	1	130429779	130437191	-	Gm15674	ENSMUSG00000087691	predicted gene 15674 [Source:MGI Symbol;Acc:MGI:3783116]	+	gene	overlapping	0	-0.171658	-0.833035	-0.800964	-0.60586
TCONS_00006425	1	130439027	130462777	-	Cd55	ENSMUSG00000026399	CD55 antigen [Source:MGI Symbol;Acc:MGI:104850]	-	gene	overlapping	0	8.51235	8.40875	9.16293	8.76403
TCONS_00002600	1	130462908	130467043	+	Gm16083	ENSMUSG00000085526	predicted gene 16083 [Source:MGI Symbol;Acc:MGI:3802163]	+	gene	overlapping	0	-0.555659	-0.883703	-0.800964	-0.60586
TCONS_00006434	1	130575235	130629621	-	Zp3r	ENSMUSG00000042554	zona pellucida 3 receptor [Source:MGI Symbol;Acc:MGI:104965]	-	gene	overlapping	0	3.0953	2.81142	2.71529	1.33862
TCONS_00002605	1	130656605	130656776	+	C4bp	ENSMUSG00000026405	complement component 4 binding protein [Source:MGI Symbol;Acc:MGI:88229]	-	gene	overlapping	0	-0.555659	-0.883703	-0.800964	-0.60586
TCONS_00006436	1	130682226	130685532	-	null					Not found	0	-0.555659	-0.883703	-0.800964	-0.60586
TCONS_00006442	1	130689245	130718825	-	Pfkfb2	ENSMUSG00000026409ption=6-phosphofructo-2-kinase/fructose-2,6-biphosphatase2 [Source:MGI Symbol;Acc:MGI:107815]	No description	-	gene	overlapping	0	1.56047	1.87289	1.07435	0.838624
TCONS_00002606	1	130716141	130716906	+	Pfkfb2	ENSMUSG00000026409ption=6-phosphofructo-2-kinase/fructose-2,6-biphosphatase2 [Source:MGI Symbol;Acc:MGI:107815]	No description	-	gene	overlapping	0	-0.555659	-0.883703	-0.800964	-0.60586
NOMERGE_TCONS_00000026	1	130717327	130724265	+	Pfkfb2	ENSMUSG00000026409ption=6-phosphofructo-2-kinase/fructose-2,6-biphosphatase2 [Source:MGI Symbol;Acc:MGI:107815]	No description	-	gene	overlapping	0	-0.555659	-0.883703	-0.800964	-0.60586
TCONS_00002610	1	130778027	130824737	+	Fcamr	ENSMUSG00000026415	Fc receptor, IgA, IgM, high affinity [Source:MGI Symbol;Acc:MGI:1927803]	+	gene	overlapping	0	0.263011	1.12995	0.546026	1.92359
TCONS_00006444	1	130810203	130820674	-	Fcamr	ENSMUSG00000026415	Fc receptor, IgA, IgM, high affinity [Source:MGI Symbol;Acc:MGI:1927803]	+	gene	overlapping	0	-0.555659	-0.883703	-0.800964	-0.60586
TCONS_00002620	1	130829010	130852249	+	Pigr	ENSMUSG00000026417	polymeric immunoglobulin receptor [Source:MGI Symbol;Acc:MGI:103080]	+	gene	overlapping	0	-0.555659	-0.883703	-0.800964	-0.529859
TCONS_00006445	1	130862882	130866701	-	Faim3	ENSMUSG00000042474	Fas apoptotic inhibitory molecule 3 [Source:MGI Symbol;Acc:MGI:1916419]	+	gene	overlapping	0	-0.555659	-0.883703	-0.750297	-0.60586
TCONS_00002621	1	130865669	130880790	+	Faim3	ENSMUSG00000042474	Fas apoptotic inhibitory molecule 3 [Source:MGI Symbol;Acc:MGI:1916419]	+	gene	overlapping	0	-0.555659	-0.883703	-0.800964	-0.529859
TCONS_00006446	1	130882074	130887454	-	Il24	ENSMUSG00000026420	interleukin 24 [Source:MGI Symbol;Acc:MGI:2135548]	-	gene	overlapping	0	-0.555659	-0.883703	-0.800964	-0.60586
TCONS_00006448	1	130905123	130917606	-	Il20	ENSMUSG00000026416	interleukin 20 [Source:MGI Symbol;Acc:MGI:1890473]	-	gene	overlapping	0	0.212343	0.463288	0.212693	1.04614
TCONS_00006452	1	130932658	130940073	-	Il19	ENSMUSG00000016524	interleukin 19 [Source:MGI Symbol;Acc:MGI:1890472]	-	gene	overlapping	0	-0.555659	-0.883703	-0.800964	-0.60586
TCONS_00006454	1	131053704	131097847	-	Mapkapk2	ENSMUSG00000016528	MAP kinase-activated protein kinase 2 [Source:MGI Symbol;Acc:MGI:109298]	-	gene	overlapping	0	2.69608	1.83972	2.07435	1.49959
TCONS_00002623	1	131112846	131123154	+	null					Not found	0	-0.555659	-0.883703	-0.800964	-0.60586
TCONS_00006458	1	131128441	131151296	-	Dyrk3	ENSMUSG00000016526	dual-specificity tyrosine-(Y)-phosphorylation regulated kinase 3 [Source:MGI Symbol;Acc:MGI:1330300]	-	gene	overlapping	0	0.740664	2.31139	-0.366296	3.2423
TCONS_00002624	1	131151985	131173478	+	Eif2d	ENSMUSG00000026427	eukaryotic translation initiation factor 2D [Source:MGI Symbol;Acc:MGI:109342]	+	gene	overlapping	0	6.03613	5.96241	5.69681	5.71607
TCONS_00006460	1	131176409	131245699	-	Eif2d	ENSMUSG00000026427	eukaryotic translation initiation factor 2D [Source:MGI Symbol;Acc:MGI:109342]	+	gene	overlapping	0	6.9974	7.16739	7.0615	7.17129
TCONS_00006463	1	131250030	131270544	-	Ikbke	ENSMUSG00000042349	inhibitor of kappaB kinase epsilon [Source:MGI Symbol;Acc:MGI:1929612]	-	gene	overlapping	0	-0.555659	-0.833035	-0.800964	-0.60586
TCONS_00002625	1	131259479	131267402	+	Ikbke	ENSMUSG00000042349	inhibitor of kappaB kinase epsilon [Source:MGI Symbol;Acc:MGI:1929612]	-	gene	overlapping	0	1.1988	0.658276	1.65334	-0.60586
TCONS_00006471	1	131285251	131527549	-	Srgap2	ENSMUSG00000026425	SLIT-ROBO Rho GTPase activating protein 2 [Source:MGI Symbol;Acc:MGI:109605]	-	gene	overlapping	0	6.10529	6.10703	6.42932	6.2942
TCONS_00002628	1	131364857	131365137	+	Srgap2	ENSMUSG00000026425	SLIT-ROBO Rho GTPase activating protein 2 [Source:MGI Symbol;Acc:MGI:109605]	-	gene	overlapping	0	-0.555659	-0.883703	-0.800964	-0.60586
TCONS_00002630	1	131527781	131539872	+	Fam72a	ENSMUSG00000055184	family with sequence similarity 72, member A [Source:MGI Symbol;Acc:MGI:1919669]	+	gene	overlapping	0	4.38004	4.19865	4.68811	4.79207
TCONS_00006475	1	131564249	131564581	-	null					Not found	0	-0.555659	-0.883703	-0.800964	-0.60586
TCONS_00006478	1	131631238	131752633	-	AC120217.1	ENSMUSG00000095841	No description	-	gene	overlapping	0	1.58877	2.12995	1.72747	0.94982
TCONS_00002634	1	131688707	131713542	+	5430435G22Rik	ENSMUSG00000052688	RIKEN cDNA 5430435G22 gene [Source:MGI Symbol;Acc:MGI:2442295]	+	gene	overlapping	0	-0.555659	-0.883703	-0.800964	-0.60586
TCONS_00002638	1	131716555	131720380	+	null					Not found	0	-0.555659	-0.883703	-0.800964	-0.60586
TCONS_00002640	1	131744022	131771504	+	Slc26a9	ENSMUSG00000042268	solute carrier family 26, member 9 [Source:MGI Symbol;Acc:MGI:2444594]	+	gene	overlapping	0	6.07366	6.32375	6.12427	5.61223
TCONS_00002642	1	131797381	131821473	+	Pm20d1	ENSMUSG00000042251	peptidase M20 domain containing 1 [Source:MGI Symbol;Acc:MGI:2442939]	+	gene	overlapping	0	-0.555659	-0.883703	-0.416963	-0.60586
TCONS_00002644	1	131827594	131848973	+	Slc41a1	ENSMUSG00000013275	solute carrier family 41, member 1 [Source:MGI Symbol;Acc:MGI:2444823]	+	gene	overlapping	0	3.67859	2.94703	3.63884	3.88236
TCONS_00002648	1	131867224	131873265	+	Rab7l1	ENSMUSG00000026433	RAB7, member RAS oncogene family-like 1 [Source:MGI Symbol;Acc:MGI:2385107]	+	gene	overlapping	0	0.545677	-0.166368	1.936	-0.453857
TCONS_00002649	1	131908615	131936382	+	Nucks1	ENSMUSG00000026434	nuclear casein kinase and cyclin-dependent kinase substrate 1 [Source:MGI Symbol;Acc:MGI:1934811]	+	gene	overlapping	0	4.6186	4.97433	4.98043	5.1986
TCONS_00002652	1	131944992	131945293	+	null					Not found	0	-0.555659	-0.883703	-0.800964	-0.60586
TCONS_00002653	1	131956401	131957299	+	null					Not found	0	-0.403656	-0.1157	-0.699629	-0.0298587
TCONS_00006494	1	131957290	131961591	-	Slc45a3	ENSMUSG00000026435	solute carrier family 45, member 3 [Source:MGI Symbol;Acc:MGI:1922082]	+	gene	downstream	1376	-0.555659	-0.883703	-0.800964	-0.60586
TCONS_00002655	1	131962311	131982963	+	Slc45a3	ENSMUSG00000026435	solute carrier family 45, member 3 [Source:MGI Symbol;Acc:MGI:1922082]	+	gene	overlapping	0	9.80535	9.85225	9.91502	9.88347
TCONS_00002658	1	132007343	132026666	+	Elk4	ENSMUSG00000026436	ELK4, member of ETS oncogene family [Source:MGI Symbol;Acc:MGI:102853]	+	gene	overlapping	0	4.09028	4.09134	4.05077	3.87881
TCONS_00006495	1	132025474	132031648	-	Elk4	ENSMUSG00000026436	ELK4, member of ETS oncogene family [Source:MGI Symbol;Acc:MGI:102853]	+	gene	overlapping	0	-0.555659	-0.883703	-0.800964	-0.60586
TCONS_00002662	1	132028934	132032612	+	Elk4	ENSMUSG00000026436	ELK4, member of ETS oncogene family [Source:MGI Symbol;Acc:MGI:102853]	+	gene	overlapping	0	2.31965	1.73241	1.92245	1.13111
TCONS_00002663	1	132036780	132067945	+	Mfsd4	ENSMUSG00000059149	major facilitator superfamily domain containing 4 [Source:MGI Symbol;Acc:MGI:2442786]	-	gene	overlapping	0	-0.555659	-0.883703	-0.800964	-0.60586
TCONS_00006497	1	132038257	132055167	-	Mfsd4	ENSMUSG00000059149	major facilitator superfamily domain containing 4 [Source:MGI Symbol;Acc:MGI:2442786]	-	gene	overlapping	0	-0.171658	-0.833035	0.212693	1.54614
TCONS_00002664	1	132102435	132106390	+	U6	ENSMUSG00000088779	U6 spliceosomal RNA [Source:RFAM;Acc:RF00026]	+	gene	upstream	1681	-0.171658	-0.203379	0.791681	0.470141
TCONS_00006498	1	132201069	132203803	-	Lemd1	ENSMUSG00000079330	LEM domain containing 1 [Source:MGI Symbol;Acc:MGI:1922403]	+	gene	overlapping	0	-0.555659	-0.883703	-0.800964	-0.60586
TCONS_00002666	1	132221251	132257381	+	Lemd1	ENSMUSG00000079330	LEM domain containing 1 [Source:MGI Symbol;Acc:MGI:1922403]	+	gene	overlapping	0	1.03699	1.12995	0.87936	0.838624
TCONS_00002671	1	132267384	132267820	+	null					Not found	0	-0.555659	-0.883703	-0.800964	-0.60586
TCONS_00002673	1	132268199	132277668	+	null					Not found	0	0.0739973	-0.304714	-0.171308	-0.60586
TCONS_00002675	1	132316126	132333488	+	Nuak2	ENSMUSG00000009772	NUAK family, SNF1-like kinase, 2 [Source:MGI Symbol;Acc:MGI:1921387]	+	gene	overlapping	0	-0.555659	-0.883703	-0.800964	-0.60586
TCONS_00006504	1	132356313	132391774	-	Tmcc2	ENSMUSG00000042066	transmembrane and coiled-coil domains 2 [Source:MGI Symbol;Acc:MGI:1916125]	-	gene	overlapping	0	7.46313	7.135	7.43008	6.99966
TCONS_00002677	1	132410339	132411108	+	null					Not found	0	-0.555659	-0.883703	-0.800964	-0.60586
TCONS_00002678	1	132417453	132466959	+	Dstyk	ENSMUSG00000042046	dual serine/threonine and tyrosine protein kinase [Source:MGI Symbol;Acc:MGI:1925064]	+	gene	overlapping	0	6.97789	7.15318	7.05815	6.95588
TCONS_00006506	1	132429850	132430213	-	Dstyk	ENSMUSG00000042046	dual serine/threonine and tyrosine protein kinase [Source:MGI Symbol;Acc:MGI:1925064]	+	gene	overlapping	0	-0.555659	-0.883703	-0.800964	-0.60586
NOMERGE_TCONS_00000063	1	132466433	132477045	-	Dstyk	ENSMUSG00000042046	dual serine/threonine and tyrosine protein kinase [Source:MGI Symbol;Acc:MGI:1925064]	+	gene	overlapping	0	-0.555659	-0.883703	-0.800964	-0.60586
TCONS_00002687	1	132477107	132505665	+	Rbbp5	ENSMUSG00000026439	retinoblastoma binding protein 5 [Source:MGI Symbol;Acc:MGI:1918367]	+	gene	overlapping	0	7.21527	6.9898	7.11038	6.81144
TCONS_00002691	1	132506495	132508888	+	Tmem81	ENSMUSG00000048174	transmembrane protein 81 [Source:MGI Symbol;Acc:MGI:1921876]	+	gene	overlapping	0	0.0233297	0.0792871	0.936001	-0.529859
TCONS_00006511	1	132509425	132542940	-	Cntn2	ENSMUSG00000053024	contactin 2 [Source:MGI Symbol;Acc:MGI:104518]	-	gene	overlapping	0	5.30525	5.71798	5.51357	5.22106
TCONS_00002692	1	132545366	132547436	+	null					Not found	0	-0.555659	-0.883703	-0.800964	-0.60586
TCONS_00006515	1	132545537	132546588	-	null					Not found	0	-0.555659	-0.883703	-0.800964	-0.60586
TCONS_00002694	1	132562424	132564556	+	Nfasc	ENSMUSG00000026442	neurofascin [Source:MGI Symbol;Acc:MGI:104753]	-	gene	upstream	135	-0.555659	-0.883703	-0.750297	-0.60586
TCONS_00006521	1	132564689	132741797	-	Nfasc	ENSMUSG00000026442	neurofascin [Source:MGI Symbol;Acc:MGI:104753]	-	gene	overlapping	0	3.04776	4.84532	3.46134	6.33403
TCONS_00002697	1	132665244	132678034	+	Nfasc	ENSMUSG00000026442	neurofascin [Source:MGI Symbol;Acc:MGI:104753]	-	gene	overlapping	0	0.457998	1.14959	1.74101	0.94982
TCONS_00006526	1	132800926	132801323	-	null					Not found	0	-0.555659	-0.883703	-0.800964	-0.60586
TCONS_00002700	1	132802594	132805427	+	null					Not found	0	0.602318	-0.782367	0.162025	0.546143
TCONS_00006528	1	132983220	133030878	-	Mdm4	ENSMUSG00000054387	transformed mouse 3T3 cell double minute 4 [Source:MGI Symbol;Acc:MGI:107934]	-	gene	overlapping	0	11.3904	11.2222	10.9826	10.7997
TCONS_00002705	1	133031690	133033099	+	null					Not found	0	-0.555659	-0.883703	-0.800964	-0.60586
TCONS_00002708	1	133033214	133108939	+	Pik3c2b	ENSMUSG00000026447	phosphoinositide-3-kinase, class 2, beta polypeptide [Source:MGI Symbol;Acc:MGI:2685045]	+	gene	overlapping	0	4.04905	4.24831	3.36947	3.79207
TCONS_00006538	1	133117764	133118349	-	null					Not found	0	-0.555659	-0.883703	-0.800964	-0.60586
TCONS_00002712	1	133129488	133139783	+	Ppp1r15b	ENSMUSG00000046062	protein phosphatase 1, regulatory (inhibitor) subunit 15b [Source:MGI Symbol;Acc:MGI:2444211]	+	gene	overlapping	0	6.03749	6.3154	6.25717	6.44015
TCONS_00006540	1	133129775	133131782	-	Ppp1r15b	ENSMUSG00000046062	protein phosphatase 1, regulatory (inhibitor) subunit 15b [Source:MGI Symbol;Acc:MGI:2444211]	+	gene	overlapping	0	-0.555659	-0.883703	-0.800964	-0.60586
TCONS_00002715	1	133246097	133303435	+	Plekha6	ENSMUSG00000041757	pleckstrin homology domain containing, family A member 6 [Source:MGI Symbol;Acc:MGI:2388662]	+	gene	overlapping	0	7.01028	7.05801	6.94844	6.38236
TCONS_00006543	1	133249352	133270361	-	Plekha6	ENSMUSG00000041757	pleckstrin homology domain containing, family A member 6 [Source:MGI Symbol;Acc:MGI:2388662]	+	gene	overlapping	0	4.99099	4.87028	4.91276	4.58987
TCONS_00002720	1	133363572	133380336	+	Etnk2	ENSMUSG00000070644	ethanolamine kinase 2 [Source:MGI Symbol;Acc:MGI:2443760]	+	gene	overlapping	0	-0.555659	-0.883703	-0.800964	0.470141
TCONS_00006552	1	133382303	133430814	-	Sox13	ENSMUSG00000070643	SRY-box containing gene 13 [Source:MGI Symbol;Acc:MGI:98361]	-	gene	overlapping	0	1.70963	0.927394	2.07435	1.04614
TCONS_00002722	1	133551879	133551995	+	null					Not found	0	-0.555659	-0.883703	-0.800964	-0.60586
TCONS_00006553	1	133603871	133610399	-	Snrpe	ENSMUSG00000090553	small nuclear ribonucleoprotein E [Source:MGI Symbol;Acc:MGI:98346]	-	gene	overlapping	0	3.40858	3.84717	4.40011	4.34517
TCONS_00002724	1	133610411	133615721	+	Snrpe	ENSMUSG00000090553	small nuclear ribonucleoprotein E [Source:MGI Symbol;Acc:MGI:98346]	-	gene	downstream	120	-0.555659	-0.499701	-0.800964	-0.60586
TCONS_00006556	1	133619868	133661447	-	Zc3h11a	ENSMUSG00000026464	zinc finger CCCH type containing 11A [Source:MGI Symbol;Acc:MGI:1917829]	-	gene	overlapping	0	5.09488	5.57867	5.05771	5.45123
TCONS_00006561	1	133702674	133801051	-	Atp2b4	ENSMUSG00000026463	ATPase, Ca++ transporting, plasma membrane 4 [Source:MGI Symbol;Acc:MGI:88111]	-	gene	overlapping	0	4.87023	4.43058	5.2462	5.30103
TCONS_00002725	1	133767147	133767866	+	Atp2b4	ENSMUSG00000026463	ATPase, Ca++ transporting, plasma membrane 4 [Source:MGI Symbol;Acc:MGI:88111]	-	gene	overlapping	0	-0.555659	-0.883703	-0.800964	-0.60586
TCONS_00002726	1	133805111	133805568	+	null					Not found	0	-0.555659	-0.883703	-0.800964	-0.60586
TCONS_00006564	1	133831957	133844882	-	null					Not found	0	1.12467	-0.499701	2.45077	-0.0298587
TCONS_00006567	1	133849836	133855743	-	null					Not found	0	-0.504991	-0.449034	-0.800964	0.0461428
TCONS_00002727	1	133863803	133865222	+	null					Not found	0	-0.555659	-0.883703	-0.800964	-0.60586
TCONS_00002728	1	133884072	133885120	+	null					Not found	0	-0.555659	-0.883703	-0.800964	-0.60586
TCONS_00002729	1	133890755	133890963	+	null					Not found	0	-0.555659	-0.883703	-0.800964	-0.60586
TCONS_00002730	1	133906531	133945918	+	Optc	ENSMUSG00000010311	opticin [Source:MGI Symbol;Acc:MGI:2151113]	-	gene	overlapping	0	2.30611	2.47809	1.51499	1.83862
TCONS_00006576	1	133910272	133928913	-	Gm15851	ENSMUSG00000090208	predicted gene 15851 [Source:MGI Symbol;Acc:MGI:3801734]	+	gene	overlapping	0	6.02637	6.11265	6.00825	6.34032
TCONS_00002735	1	133945996	133953227	+	null					Not found	0	-0.555659	-0.499701	-0.800964	0.262622
TCONS_00002736	1	133982403	133995616	+	null					Not found	0	-0.504991	-0.833035	-0.416963	1.04614
TCONS_00006577	1	133997209	133999450	-	null					Not found	0	-0.555659	-0.883703	-0.800964	-0.60586
TCONS_00002740	1	133997869	134011304	+	null					Not found	0	-0.555659	-0.833035	-0.800964	-0.529859
TCONS_00006578	1	134075170	134079194	-	Btg2	ENSMUSG00000020423	B cell translocation gene 2, anti-proliferative [Source:MGI Symbol;Acc:MGI:108384]	-	gene	overlapping	0	3.77509	2.56556	3.85165	3.98133
TCONS_00002746	1	134138644	134151540	+	Chit1	ENSMUSG00000026450	chitinase 1 (chitotriosidase) [Source:MGI Symbol;Acc:MGI:1919134]	+	gene	overlapping	0	-0.403656	1.04228	0.741014	4.11078
TCONS_00006580	1	134201895	134234176	-	Adora1	ENSMUSG00000042429	adenosine A1 receptor [Source:MGI Symbol;Acc:MGI:99401]	-	gene	overlapping	0	-0.555659	-0.833035	-0.800964	-0.60586
TCONS_00002750	1	134271409	134272001	+	null					Not found	0	-0.555659	-0.883703	-0.800964	-0.60586
TCONS_00006582	1	134296783	134332970	-	Ppfia4	ENSMUSG00000026458	protein tyrosine phosphatase, receptor type, f polypeptide (PTPRF), interacting protein (liprin), alpha 4 [Source:MGI Symbol;Acc:MGI:1915757]	-	gene	overlapping	0	-0.12099	-0.833035	0.162025	-0.60586
TCONS_00006591	1	134346097	134362024	-	Tmem183a	ENSMUSG00000042305	transmembrane protein 183A [Source:MGI Symbol;Acc:MGI:1914729]	-	gene	overlapping	0	6.66841	6.53568	6.39676	6.29482
TCONS_00002752	1	134361287	134365144	+	Tmem183a	ENSMUSG00000042305	transmembrane protein 183A [Source:MGI Symbol;Acc:MGI:1914729]	-	gene	overlapping	0	-0.12099	-0.883703	-0.416963	-0.60586
TCONS_00002757	1	134405781	134411740	+	Cyb5r1	ENSMUSG00000026456	cytochrome b5 reductase 1 [Source:MGI Symbol;Acc:MGI:1919267]	+	gene	overlapping	0	-0.555659	-0.883703	-0.800964	-0.529859
TCONS_00002758	1	134415323	134433351	+	Adipor1	ENSMUSG00000026457	adiponectin receptor 1 [Source:MGI Symbol;Acc:MGI:1919924]	+	gene	overlapping	0	5.68617	5.64115	5.89427	6.12308
TCONS_00002763	1	134455508	134491018	+	Klhl12	ENSMUSG00000026455	kelch-like 12 (Drosophila) [Source:MGI Symbol;Acc:MGI:2385619]	+	gene	overlapping	0	5.68851	5.74325	5.23073	5.60187
TCONS_00002766	1	134494443	134508454	+	Rabif	ENSMUSG00000042229	RAB interacting factor [Source:MGI Symbol;Acc:MGI:2138605]	+	gene	overlapping	0	5.25051	5.48049	4.22005	4.52324
TCONS_00006596	1	134508570	134519054	-	Rabif	ENSMUSG00000042229	RAB interacting factor [Source:MGI Symbol;Acc:MGI:2138605]	+	gene	upstream	688	0.407331	0.37561	1.80648	2.53478
TCONS_00002768	1	134510690	134511032	+	null					Not found	0	-0.555659	-0.883703	-0.800964	-0.60586
TCONS_00002769	1	134519694	134523115	+	null					Not found	0	-0.555659	-0.883703	-0.800964	-0.60586
TCONS_00002771	1	134530496	134533278	+	null					Not found	0	-0.555659	-0.883703	-0.800964	-0.60586
TCONS_00002773	1	134547101	134547561	+	4931440L10Rik	ENSMUSG00000046367	RIKEN cDNA 4931440L10 gene [Source:MGI Symbol;Acc:MGI:1918251]	-	gene	overlapping	0	-0.555659	-0.883703	-0.800964	-0.60586
TCONS_00002775	1	134560170	134634237	+	Kdm5b	ENSMUSG00000042207	lysine (K)-specific demethylase 5B [Source:MGI Symbol;Acc:MGI:1922855]	+	gene	overlapping	0	1.12467	-0.254046	2.18166	2.89636
TCONS_00006597	1	134616953	134617142	-	Kdm5b	ENSMUSG00000042207	lysine (K)-specific demethylase 5B [Source:MGI Symbol;Acc:MGI:1922855]	+	gene	overlapping	0	-0.555659	-0.883703	-0.800964	-0.60586
TCONS_00006598	1	134637864	134638348	-	null					Not found	0	-0.555659	-0.883703	-0.800964	-0.60586
TCONS_00002777	1	134637920	134639507	+	null					Not found	0	-0.555659	-0.883703	-0.800964	-0.60586
TCONS_00006599	1	134642254	134646520	-	null					Not found	0	-0.555659	-0.883703	-0.416963	-0.60586
TCONS_00002780	1	134645968	134762272	+	Syt2	ENSMUSG00000026452	synaptotagmin II [Source:MGI Symbol;Acc:MGI:99666]	+	gene	overlapping	0	3.32711	3.27344	2.96095	3.05733
CUFF.2399.1	1	134659750	134660054	-	null					Not found	0	-0.555659	-0.883703	-0.800964	-0.60586
TCONS_00006600	1	134754658	134955942	-	Ppp1r12b	ENSMUSG00000073557	protein phosphatase 1, regulatory (inhibitor) subunit 12B [Source:MGI Symbol;Acc:MGI:1916417]	-	gene	overlapping	0	5.35872	5.62538	5.17404	5.7194
TCONS_00002783	1	134962142	134974162	+	Ube2t	ENSMUSG00000026429	ubiquitin-conjugating enzyme E2T (putative) [Source:MGI Symbol;Acc:MGI:1914446]	+	gene	overlapping	0	7.6027	7.46889	7.57417	7.67028
TCONS_00006609	1	134983298	135105345	-	Lgr6	ENSMUSG00000042793	leucine-rich repeat-containing G protein-coupled receptor 6 [Source:MGI Symbol;Acc:MGI:2441805]	-	gene	overlapping	0	5.17921	4.62946	5.3501	5.54491
CUFF.2402.1	1	135029851	135030020	+	Lgr6	ENSMUSG00000042793	leucine-rich repeat-containing G protein-coupled receptor 6 [Source:MGI Symbol;Acc:MGI:2441805]	-	gene	overlapping	0	-0.555659	-0.883703	-0.800964	-0.60586
TCONS_00006612	1	135108497	135127950	-	Ptprv	ENSMUSG00000066885	protein tyrosine phosphatase, receptor type, V [Source:MGI Symbol;Acc:MGI:108027]	-	gene	overlapping	0	-0.555659	0.796622	-0.750297	-0.60586
TCONS_00002784	1	135127826	135128750	+	null					Not found	0	-0.555659	-0.883703	-0.800964	-0.60586
TCONS_00002785	1	135132725	135145320	+	Ptpn7	ENSMUSG00000031506	protein tyrosine phosphatase, non-receptor type 7 [Source:MGI Symbol;Acc:MGI:2156893]	+	gene	overlapping	0	-0.555659	-0.883703	-0.800964	-0.60586
TCONS_00002787	1	135146746	135156272	+	Arl8a	ENSMUSG00000026426	ADP-ribosylation factor-like 8A [Source:MGI Symbol;Acc:MGI:1915974]	+	gene	overlapping	0	5.764	5.48087	5.88197	5.69532
TCONS_00006615	1	135211402	135211976	-	null					Not found	0	-0.555659	-0.883703	-0.750297	-0.60586
TCONS_00002791	1	135232045	135233411	+	Gm4204	ENSMUSG00000079139	predicted gene 4204 [Source:MGI Symbol;Acc:MGI:3782381]	+	gene	overlapping	0	5.93259	5.97844	5.72312	5.7423
TCONS_00006618	1	135253474	135259242	-	Elf3	ENSMUSG00000003051	E74-like factor 3 [Source:MGI Symbol;Acc:MGI:1101781]	-	gene	overlapping	0	5.0585	3.12524	5.20668	5.78401
TCONS_00006624	1	135262711	135279112	-	Rnpep	ENSMUSG00000041926	arginyl aminopeptidase (aminopeptidase B) [Source:MGI Symbol;Acc:MGI:2384902]	-	gene	overlapping	0	2.9606	3.04825	3.31243	3.12608
TCONS_00006625	1	135280446	135280591	-	Rnpep	ENSMUSG00000041926	arginyl aminopeptidase (aminopeptidase B) [Source:MGI Symbol;Acc:MGI:2384902]	-	gene	overlapping	0	-0.555659	-0.883703	-0.800964	-0.60586
TCONS_00006630	1	135294915	135313839	-	Timm17a	ENSMUSG00000062580	translocase of inner mitochondrial membrane 17a [Source:MGI Symbol;Acc:MGI:1343131]	-	gene	overlapping	0	6.22579	5.94867	6.04805	6.18935
TCONS_00006633	1	135371057	135375697	-	Shisa4	ENSMUSG00000041889	shisa homolog 4 (Xenopus laevis) [Source:MGI Symbol;Acc:MGI:1924802]	-	gene	overlapping	0	-0.12099	-0.203379	-0.699629	0.631105
TCONS_00006635	1	135380811	135430508	-	Ipo9	ENSMUSG00000041879	importin 9 [Source:MGI Symbol;Acc:MGI:1918944]	-	gene	overlapping	0	7.0344	6.9982	7.02454	7.16818
TCONS_00006643	1	135434580	135688179	-	Nav1	ENSMUSG00000009418	neuron navigator 1 [Source:MGI Symbol;Acc:MGI:2183683]	-	gene	overlapping	0	6.29861	5.79782	6.39857	5.23339
TCONS_00002792	1	135515065	135532181	+	Nav1	ENSMUSG00000009418	neuron navigator 1 [Source:MGI Symbol;Acc:MGI:2183683]	-	gene	overlapping	0	-0.555659	-0.883703	0.162025	-0.529859
CUFF.2425.1	1	135533073	135533944	+	Nav1	ENSMUSG00000009418	neuron navigator 1 [Source:MGI Symbol;Acc:MGI:2183683]	-	gene	overlapping	0	-0.555659	-0.883703	-0.750297	-0.529859
CUFF.2430.1	1	135564675	135566435	+	Nav1	ENSMUSG00000009418	neuron navigator 1 [Source:MGI Symbol;Acc:MGI:2183683]	-	gene	overlapping	0	-0.555659	-0.833035	0.162025	-0.60586
TCONS_00006652	1	135698631	135700542	-	null					Not found	0	-0.555659	-0.883703	-0.800964	-0.60586
TCONS_00002794	1	135703297	135703613	+	null					Not found	0	-0.555659	-0.883703	-0.800964	-0.60586
TCONS_00006653	1	135726852	135727572	-	Csrp1	ENSMUSG00000026421	cysteine and glycine-rich protein 1 [Source:MGI Symbol;Acc:MGI:88549]	+	gene	overlapping	0	-0.555659	-0.883703	-0.800964	-0.60586
TCONS_00002795	1	135729125	135752232	+	Csrp1	ENSMUSG00000026421	cysteine and glycine-rich protein 1 [Source:MGI Symbol;Acc:MGI:88549]	+	gene	overlapping	0	4.2606	4.13432	4.23044	3.78603
TCONS_00002800	1	135766119	135769136	+	Phlda3	ENSMUSG00000041801	pleckstrin homology-like domain, family A, member 3 [Source:MGI Symbol;Acc:MGI:1351485]	+	gene	overlapping	0	-0.555659	-0.883703	-0.800964	-0.60586
TCONS_00002802	1	135818598	135833341	+	Lad1	ENSMUSG00000041782	ladinin [Source:MGI Symbol;Acc:MGI:109343]	+	gene	overlapping	0	-0.504991	-0.782367	-0.800964	-0.60586
TCONS_00006654	1	135859547	135859847	-	null					Not found	0	-0.555659	-0.883703	-0.800964	-0.60586
TCONS_00006656	1	135864800	135866723	-	null					Not found	0	-0.504991	-0.883703	-0.750297	-0.60586
TCONS_00002803	1	135865800	135869856	+	Pkp1	ENSMUSG00000026413	plakophilin 1 [Source:MGI Symbol;Acc:MGI:1328359]	-	gene	upstream	1539	-0.555659	-0.883703	-0.750297	-0.529859
TCONS_00006657	1	135872950	135919120	-	Pkp1	ENSMUSG00000026413	plakophilin 1 [Source:MGI Symbol;Acc:MGI:1328359]	-	gene	overlapping	0	-0.555659	-0.883703	-0.800964	-0.60586
TCONS_00002804	1	135934243	135940806	+	null					Not found	0	2.94448	2.92404	4.11594	3.43682
TCONS_00002807	1	135951643	135952829	+	Igfn1	ENSMUSG00000051985	immunoglobulin-like and fibronectin type III domain containing 1 [Source:MGI Symbol;Acc:MGI:3045352]	-	gene	upstream	749	-0.555659	-0.883703	-0.800964	-0.60586
TCONS_00006660	1	135953550	136018876	-	Igfn1	ENSMUSG00000051985	immunoglobulin-like and fibronectin type III domain containing 1 [Source:MGI Symbol;Acc:MGI:3045352]	-	gene	overlapping	0	2.67262	2.20409	1.81514	1.99959
TCONS_00002808	1	136017724	136035308	+	Tmem9	ENSMUSG00000026411	transmembrane protein 9 [Source:MGI Symbol;Acc:MGI:1913491]	+	gene	overlapping	0	3.06045	3.87042	3.55747	4.17954
TCONS_00002811	1	136131389	136178010	+	Kif21b	ENSMUSG00000041642	kinesin family member 21B [Source:MGI Symbol;Acc:MGI:109234]	+	gene	overlapping	0	5.05165	4.89241	5.01403	6.10253
TCONS_00006672	1	136181474	136207097	-	2310006M14Rik	ENSMUSG00000087230	RIKEN cDNA 2310006M14 gene [Source:MGI Symbol;Acc:MGI:1923672]	-	gene	overlapping	0	2.81694	2.45571	1.89899	3.12608
TCONS_00002812	1	136216074	136225071	+	5730559C18Rik	ENSMUSG00000041605	RIKEN cDNA 5730559C18 gene [Source:MGI Symbol;Acc:MGI:1921579]	-	gene	overlapping	0	-0.555659	-0.833035	-0.800964	-0.60586
NOMERGE_TCONS_00000029	1	136259407	136274406	+	Gpr25	ENSMUSG00000052759	G protein-coupled receptor 25 [Source:MGI Symbol;Acc:MGI:2686146]	-	gene	overlapping	0	-0.504991	-0.833035	-0.221976	-0.60586
TCONS_00006679	1	136268122	136346142	-	Camsap2	ENSMUSG00000041570	calmodulin regulated spectrin-associated protein family, member 2 [Source:MGI Symbol;Acc:MGI:1922434]	-	gene	overlapping	0	8.48831	8.40571	8.66855	7.92982
TCONS_00002813	1	136379290	136401164	+	null					Not found	0	-0.454323	-0.0650327	-0.12064	3.40327
NOMERGE_TCONS_00000064	1	136411916	136415519	-	Ddx59	ENSMUSG00000026404	DEAD (Asp-Glu-Ala-Asp) box polypeptide 59 [Source:MGI Symbol;Acc:MGI:1915247]	+	gene	overlapping	0	-0.504991	-0.833035	-0.750297	-0.60586
TCONS_00002815	1	136415271	136440190	+	Ddx59	ENSMUSG00000026404	DEAD (Asp-Glu-Ala-Asp) box polypeptide 59 [Source:MGI Symbol;Acc:MGI:1915247]	+	gene	overlapping	0	4.79121	4.521	4.62872	4.34517
TCONS_00002816	1	136466286	136531511	+	Kif14	ENSMUSG00000041498	kinesin family member 14 [Source:MGI Symbol;Acc:MGI:1098226]	+	gene	overlapping	0	8.20539	8.34744	8.34298	8.00272
TCONS_00006682	1	136523227	136523565	-	Kif14	ENSMUSG00000041498	kinesin family member 14 [Source:MGI Symbol;Acc:MGI:1098226]	+	gene	overlapping	0	-0.555659	-0.883703	-0.800964	-0.60586
TCONS_00002821	1	136556645	136557166	+	null					Not found	0	-0.555659	-0.883703	-0.800964	-0.60586
TCONS_00002822	1	136569082	136569570	+	null					Not found	0	-0.555659	-0.883703	-0.800964	-0.60586
TCONS_00002823	1	136571156	136614616	+	null					Not found	0	-0.555659	-0.833035	-0.750297	0.762622
TCONS_00006683	1	136622098	136624730	-	Zfp281	ENSMUSG00000041483	zinc finger protein 281 [Source:MGI Symbol;Acc:MGI:3029290]	+	gene	downstream	171	-0.504991	-0.883703	-0.800964	-0.60586
TCONS_00002828	1	136624821	136633206	+	Zfp281	ENSMUSG00000041483	zinc finger protein 281 [Source:MGI Symbol;Acc:MGI:3029290]	+	gene	overlapping	0	1.89864	1.23726	1.89416	2.42359
TCONS_00006685	1	136635668	136642909	-	null					Not found	0	3.24677	2.1866	2.54603	1.33862
TCONS_00002829	1	136670769	136690804	+	null					Not found	0	2.99624	2.31139	3.00147	0.838624
TCONS_00002843	1	136696211	136728232	+	AC125186.1	ENSMUSG00000092912	No description	+	gene	overlapping	0	0.0739974	-0.398366	0.357013	-0.529859
TCONS_00006686	1	136706547	136707380	-	null					Not found	0	-0.555659	-0.883703	-0.800964	-0.60586
TCONS_00006689	1	136763182	136763575	-	null					Not found	0	-0.555659	-0.883703	-0.800964	-0.60586
TCONS_00002853	1	136820378	136820851	+	null					Not found	0	-0.555659	-0.883703	-0.800964	-0.60586
TCONS_00002854	1	136823080	136824409	+	null					Not found	0	-0.555659	-0.883703	-0.800964	-0.60586
TCONS_00006692	1	136842572	136954427	-	Nr5a2	ENSMUSG00000026398	nuclear receptor subfamily 5, group A, member 2 [Source:MGI Symbol;Acc:MGI:1346834]	-	gene	overlapping	0	6.74038	6.52897	6.23098	6.17954
TCONS_00006697	1	136970055	136978128	-	null					Not found	0	-0.555659	-0.883703	-0.800964	-0.60586
TCONS_00002856	1	136997337	137157755	+	null					Not found	0	-0.555659	0.745954	-0.221976	0.470141
TCONS_00002871	1	137220716	137475985	+	SNORA17	ENSMUSG00000088164	Small nucleolar RNA SNORA17 [Source:RFAM;Acc:RF00560]	-	gene	overlapping	0	1.03699	0.10275	0.741014	0.707107
TCONS_00006698	1	137222392	137223358	-	null					Not found	0	-0.555659	-0.883703	-0.800964	-0.60586
TCONS_00006700	1	137987657	137988692	-	5S_rRNA	ENSMUSG00000088564	5S ribosomal RNA [Source:RFAM;Acc:RF00001]	-	gene	overlapping	0	-0.555659	-0.883703	-0.800964	-0.60586
TCONS_00002884	1	138022374	138024288	+	null					Not found	0	-0.555659	-0.833035	-0.750297	-0.60586
TCONS_00006702	1	138432510	138433225	-	null					Not found	0	-0.555659	-0.883703	-0.800964	-0.60586
TCONS_00002885	1	138446604	138501147	+	Nek7	ENSMUSG00000026393	NIMA (never in mitosis gene a)-related expressed kinase 7 [Source:MGI Symbol;Acc:MGI:1890645]	-	gene	overlapping	0	0.407331	0.268301	1.48181	2.13111
TCONS_00006705	1	138483834	138619755	-	Nek7	ENSMUSG00000026393	NIMA (never in mitosis gene a)-related expressed kinase 7 [Source:MGI Symbol;Acc:MGI:1890645]	-	gene	overlapping	0	4.36332	3.84823	4.28997	4.00408
TCONS_00002887	1	138638586	138639441	+	null					Not found	0	-0.555659	-0.499701	-0.171308	-0.0298587
TCONS_00006706	1	138640188	138640662	-	null					Not found	0	-0.555659	-0.883703	-0.800964	-0.60586
TCONS_00006707	1	138688950	138691761	-	null					Not found	0	-0.12099	0.274275	0.633704	-0.60586
TCONS_00006709	1	138701131	138759232	-	null					Not found	0	-0.171658	-0.254046	-0.366296	-0.529859
TCONS_00006730	1	138760085	138777615	-	null					Not found	0	-0.555659	-0.833035	-0.366296	-0.529859
TCONS_00006734	1	138827997	138848576	-	Lhx9	ENSMUSG00000019230	LIM homeobox protein 9 [Source:MGI Symbol;Acc:MGI:1316721]	-	gene	overlapping	0	-0.555659	-0.883703	-0.800964	-0.60586
TCONS_00006737	1	138851979	138856854	-	2310009B15Rik	ENSMUSG00000079283	RIKEN cDNA 2310009B15 gene [Source:MGI Symbol;Acc:MGI:1916799]	-	gene	overlapping	0	-0.504991	-0.499701	-0.750297	-0.60586
TCONS_00006738	1	138903617	138903726	-	null					Not found	0	-0.555659	-0.883703	-0.800964	-0.60586
TCONS_00002892	1	138963102	139176043	+	Dennd1b	ENSMUSG00000056268	DENN/MADD domain containing 1B [Source:MGI Symbol;Acc:MGI:2447812]	+	gene	overlapping	0	0.791332	1.12995	2.11284	1.86807
TCONS_00006742	1	139197056	139377100	-	Crb1	ENSMUSG00000063681	crumbs homolog 1 (Drosophila) [Source:MGI Symbol;Acc:MGI:2136343]	-	gene	overlapping	0	5.05089	5.2194	4.87401	5.12608
TCONS_00006749	1	139399846	139407017	-	null					Not found	0	-0.555659	-0.883703	-0.800964	-0.529859
TCONS_00002899	1	139408276	139414085	+	null					Not found	0	-0.504991	-0.883703	-0.750297	-0.529859
TCONS_00002901	1	139422007	139453005	+	Zbtb41	ENSMUSG00000033964	zinc finger and BTB domain containing 41 homolog [Source:MGI Symbol;Acc:MGI:2444487]	+	gene	overlapping	0	4.77509	4.92356	4.69643	5.11528
TCONS_00002905	1	139454721	139494092	+	Aspm	ENSMUSG00000033952	asp (abnormal spindle)-like, microcephaly associated (Drosophila) [Source:MGI Symbol;Acc:MGI:1334448]	+	gene	overlapping	0	10.3769	10.2388	10.1277	10.1255
TCONS_00002910	1	139516394	139517904	+	F13b	ENSMUSG00000026368	coagulation factor XIII, beta subunit [Source:MGI Symbol;Acc:MGI:88379]	+	gene	overlapping	0	-0.555659	-0.883703	-0.800964	-0.529859
TCONS_00006750	1	139558532	139558652	-	Cfhr1	ENSMUSG00000057037	complement factor H-related 1 [Source:MGI Symbol;Acc:MGI:2138169]	-	gene	overlapping	0	-0.555659	-0.883703	-0.800964	-0.60586
TCONS_00006752	1	139697635	139781239	-	Gm4788	ENSMUSG00000070594	predicted gene 4788 [Source:MGI Symbol;Acc:MGI:3646434]	-	gene	overlapping	0	-0.555659	-0.883703	-0.800964	-0.60586
TCONS_00006754	1	139810293	140070729	-	Cfhr2	ENSMUSG00000033898	complement factor H-related 2 [Source:MGI Symbol;Acc:MGI:3611575]	-	gene	overlapping	0	0.0739974	1.37561	-0.0836299	2.61078
TCONS_00006773	1	140085855	140183317	-	Cfh	ENSMUSG00000026365	complement component factor h [Source:MGI Symbol;Acc:MGI:88385]	-	gene	overlapping	0	-0.555659	-0.833035	-0.800964	-0.529859
TCONS_00002912	1	140186964	140192987	+	null					Not found	0	-0.555659	-0.499701	-0.800964	-0.529859
TCONS_00006775	1	140798101	140833746	-	null					Not found	0	0.0739973	-0.0650327	0.495359	1.33862
CUFF.2536.1	1	140805153	140807630	+	null					Not found	0	-0.555659	-0.883703	-0.800964	-0.60586
CUFF.2538.1	1	140811304	140812067	+	null					Not found	0	-0.555659	-0.883703	-0.800964	-0.60586
TCONS_00006784	1	140835106	140835853	-	null					Not found	0	-0.555659	-0.883703	-0.800964	-0.453857
TCONS_00002916	1	140835985	140852527	+	null					Not found	0	4.04905	3.83972	3.91379	4.06834
TCONS_00002918	1	140856497	140857115	+	null					Not found	0	-0.555659	-0.883703	-0.800964	-0.60586
TCONS_00002921	1	141729211	141730266	+	null					Not found	0	-0.555659	-0.883703	-0.800964	-0.60586
TCONS_00006787	1	141742498	141743301	-	null					Not found	0	-0.555659	-0.883703	-0.800964	-0.60586
TCONS_00006788	1	141745444	141746501	-	null					Not found	0	-0.555659	-0.883703	-0.800964	-0.60586
TCONS_00006792	1	141949253	141998745	-	null					Not found	0	-0.171658	0.129955	-0.800964	-0.0298587
TCONS_00002922	1	142000692	142009682	+	null					Not found	0	-0.555659	-0.883703	-0.800964	-0.60586
TCONS_00002924	1	142277489	142278058	+	null					Not found	0	-0.555659	-0.883703	-0.800964	-0.60586
TCONS_00002925	1	142300247	142317670	+	null					Not found	0	-0.555659	-0.499701	-0.800964	-0.0298587
TCONS_00002932	1	142322111	142322822	+	null					Not found	0	-0.555659	-0.883703	-0.800964	-0.60586
TCONS_00002934	1	142327928	142388680	+	null					Not found	0	-0.555659	-0.883703	-0.750297	-0.60586
TCONS_00006804	1	142395193	142397230	-	null					Not found	0	-0.555659	-0.883703	-0.800964	-0.60586
TCONS_00006808	1	142890012	142934014	-	null					Not found	0	0.212343	-0.833035	-0.416963	-0.60586
TCONS_00006814	1	142975411	142978478	-	null					Not found	0	-0.555659	-0.883703	-0.800964	-0.60586
TCONS_00006817	1	142981252	142989434	-	null					Not found	0	-0.555659	-0.731699	-0.800964	-0.60586
TCONS_00006823	1	143006045	143295573	-	null					Not found	0	2.86546	2.98552	2.97398	2.99959
TCONS_00006834	1	143379140	143379418	-	null					Not found	0	-0.555659	-0.883703	-0.800964	-0.60586
TCONS_00006835	1	143504326	143520425	-	null					Not found	0	-0.555659	-0.883703	-0.416963	-0.60586
TCONS_00002939	1	143555618	143598527	+	Cdc73	ENSMUSG00000026361	cell division cycle 73, Paf1/RNA polymerase II complex component, homolog (S. cerevisiae) [Source:MGI Symbol;Acc:MGI:2384876]	-	gene	upstream	270	1.1988	0.51993	1.23232	2.61078
TCONS_00006837	1	143598797	143703107	-	Cdc73	ENSMUSG00000026361	cell division cycle 73, Paf1/RNA polymerase II complex component, homolog (S. cerevisiae) [Source:MGI Symbol;Acc:MGI:2384876]	-	gene	overlapping	0	4.2458	4.58752	4.11409	4.6533
TCONS_00002942	1	143739512	143749676	+	Glrx2	ENSMUSG00000018196	glutaredoxin 2 (thioltransferase) [Source:MGI Symbol;Acc:MGI:1916617]	+	gene	overlapping	0	-0.555659	-0.883703	-0.750297	-0.453857
TCONS_00006840	1	143750705	143777068	-	Trove2	ENSMUSG00000018199	TROVE domain family, member 2 [Source:MGI Symbol;Acc:MGI:106652]	-	gene	overlapping	0	1.26301	2.26073	1.83752	2.70711
TCONS_00002944	1	143777170	143807466	+	Uchl5	ENSMUSG00000018189	ubiquitin carboxyl-terminal esterase L5 [Source:MGI Symbol;Acc:MGI:1914848]	+	gene	overlapping	0	4.63513	4.91873	5.03692	4.83862
TCONS_00006842	1	143859848	143860850	-	null					Not found	0	-0.555659	-0.883703	-0.800964	-0.60586
TCONS_00006846	1	143999338	144004503	-	Rgs2	ENSMUSG00000026360	regulator of G-protein signaling 2 [Source:MGI Symbol;Acc:MGI:1098271]	-	gene	overlapping	0	9.36028	9.2338	8.78484	9.0193
TCONS_00002949	1	144252450	144278775	+	null					Not found	0	-0.555659	-0.499701	-0.800964	-0.0298587
TCONS_00006847	1	144262048	144265436	-	null					Not found	0	-0.171658	-0.883703	-0.750297	-0.529859
TCONS_00002953	1	144307728	144308942	+	null					Not found	0	-0.555659	-0.883703	-0.800964	-0.60586
TCONS_00002954	1	144336224	144339450	+	null					Not found	0	-0.504991	-0.883703	-0.800964	-0.60586
TCONS_00006850	1	144708823	144709785	-	null					Not found	0	-0.555659	-0.883703	-0.800964	-0.60586
TCONS_00006856	1	146112003	146113234	-	null					Not found	0	-0.555659	-0.883703	-0.800964	-0.60586
TCONS_00002959	1	146113414	146121072	+	null					Not found	0	-0.555659	-0.883703	-0.800964	-0.60586
TCONS_00006857	1	146285988	146286730	-	null					Not found	0	-0.555659	-0.883703	-0.800964	-0.60586
TCONS_00002965	1	146412017	146413312	+	null					Not found	0	1.26301	1.32494	2.43997	2.94982
TCONS_00002966	1	146420305	146421351	+	Gm5263	ENSMUSG00000090323	predicted gene 5263 [Source:MGI Symbol;Acc:MGI:3647343]	+	gene	overlapping	0	-0.12099	-0.1157	0.212693	1.83862
TCONS_00002967	1	146433502	146435894	+	null					Not found	0	3.05178	2.47074	3.01013	3.69575
TCONS_00002969	1	146497687	146902472	+	Fam5c	ENSMUSG00000035131	family with sequence similarity 5, member C [Source:MGI Symbol;Acc:MGI:2443035]	+	gene	overlapping	0	-0.504991	0.550966	-0.12064	0.546143
ENSMUST00000126596	1	146802965	146806022	-	Fam5c	ENSMUSG00000035131	family with sequence similarity 5, member C [Source:MGI Symbol;Acc:MGI:2443035]	+	gene	overlapping	0	-0.555659	-0.883703	-0.800964	-0.60586
TCONS_00006859	1	146809831	146841696	-	Fam5c	ENSMUSG00000035131	family with sequence similarity 5, member C [Source:MGI Symbol;Acc:MGI:2443035]	+	gene	overlapping	0	-0.555659	-0.883703	-0.800964	-0.60586
TCONS_00006860	1	147164926	147165815	-	null					Not found	0	-0.555659	-0.883703	-0.800964	-0.60586
TCONS_00006861	1	147171600	147176986	-	null					Not found	0	-0.555659	-0.883703	-0.800964	-0.60586
TCONS_00006863	1	147200576	147201684	-	null					Not found	0	-0.555659	-0.883703	-0.800964	-0.60586
TCONS_00002972	1	147203179	147204476	+	null					Not found	0	-0.555659	-0.883703	-0.800964	-0.60586
TCONS_00006868	1	147359873	147372534	-	null					Not found	0	0.0739974	1.59406	-0.221976	-0.60586
TCONS_00002974	1	147372598	147391218	+	null					Not found	0	2.56531	3.00438	3.09398	2.33862
TCONS_00002975	1	147419942	147421439	+	null					Not found	0	-0.555659	-0.883703	-0.800964	-0.60586
TCONS_00006877	1	148321190	148321214	-	null					Not found	0	-0.555659	-0.883703	-0.800964	-0.60586
TCONS_00002977	1	148436963	148481838	+	null					Not found	0	1.26898	1.76558	1.62016	1.86807
CUFF.2613.1	1	148447543	148449365	-	null					Not found	0	-0.555659	-0.883703	-0.800964	-0.60586
TCONS_00006881	1	148924958	148929700	-	null					Not found	0	-0.555659	-0.304714	-0.800964	-0.529859
TCONS_00002987	1	149419012	149420588	+	null					Not found	0	-0.555659	-0.883703	-0.800964	-0.60586
TCONS_00006890	1	149624613	149638868	-	null					Not found	0	-0.504991	-0.833035	-0.750297	-0.0298587
TCONS_00006893	1	149829618	149961290	-	Pla2g4a	ENSMUSG00000056220	phospholipase A2, group IVA (cytosolic, calcium-dependent) [Source:MGI Symbol;Acc:MGI:1195256]	-	gene	overlapping	0	-0.504991	-0.833035	-0.750297	-0.453857
TCONS_00002992	1	150100003	150108202	+	Ptgs2	ENSMUSG00000032487	prostaglandin-endoperoxide synthase 2 [Source:MGI Symbol;Acc:MGI:97798]	+	gene	overlapping	0	-0.171658	-0.008391	-0.750297	4.09779
TCONS_00002993	1	150164856	150165660	+	null					Not found	0	-0.555659	-0.883703	-0.800964	-0.60586
TCONS_00002996	1	150272303	150272703	+	null					Not found	0	-0.555659	-0.883703	-0.800964	-0.60586
NOMERGE_TCONS_00000068	1	150361305	150393080	-	BC003331	ENSMUSG00000006010	cDNA sequence BC003331 [Source:MGI Symbol;Acc:MGI:2385108]	-	gene	overlapping	0	4.38066	4.63981	4.90213	4.33862
TCONS_00002997	1	150392838	150449827	+	BC003331	ENSMUSG00000006010	cDNA sequence BC003331 [Source:MGI Symbol;Acc:MGI:2385108]	-	gene	overlapping	0	8.52069	8.56209	8.82474	8.57464
NOMERGE_TCONS_00000070	1	150449412	150466165	-	Tpr	ENSMUSG00000006005	translocated promoter region [Source:MGI Symbol;Acc:MGI:1922066]	+	gene	overlapping	0	3.27047	3.24311	3.71989	5.42858
TCONS_00002998	1	150625299	150783499	+	Hmcn1	ENSMUSG00000066842	hemicentin 1 [Source:MGI Symbol;Acc:MGI:2685047]	-	gene	overlapping	0	-0.555659	-0.883703	-0.800964	-0.60586
TCONS_00006896	1	150741988	150993435	-	Hmcn1	ENSMUSG00000066842	hemicentin 1 [Source:MGI Symbol;Acc:MGI:2685047]	-	gene	overlapping	0	-0.555659	-0.883703	-0.800964	-0.60586
TCONS_00006898	1	151013584	151015476	-	null					Not found	0	0.124665	0.463288	0.741014	-0.60586
TCONS_00006899	1	151017811	151033547	-	null					Not found	0	-0.171658	0.37561	-0.366296	0.0461428
TCONS_00002999	1	151036226	151037516	+	null					Not found	0	-0.555659	-0.883703	-0.800964	-0.60586
TCONS_00006901	1	151074408	151114452	-	null					Not found	0	-0.555659	-0.883703	-0.800964	-0.60586
TCONS_00003000	1	151110998	151128638	+	null					Not found	0	1.70963	0.903931	0.185488	2.11078
TCONS_00003013	1	151130987	151132597	+	null					Not found	0	-0.555659	-0.883703	-0.800964	-0.60586
TCONS_00003017	1	151132864	151144087	+	null					Not found	0	-0.504991	-0.499701	-0.750297	-0.60586
TCONS_00006902	1	151142201	151156344	-	null					Not found	0	-0.555659	-0.883703	-0.416963	-0.60586
TCONS_00003024	1	151154307	151167877	+	null					Not found	0	-0.555659	-0.883703	-0.800964	-0.60586
TCONS_00006904	1	151220185	151224445	-	null					Not found	0	-0.555659	-0.883703	-0.800964	-0.529859
TCONS_00006912	1	151239671	151252863	-	null					Not found	0	2.62195	3.13987	3.22015	2.83862
TCONS_00003026	1	151252193	151255752	+	null					Not found	0	-0.555659	-0.449034	-0.750297	-0.60586
TCONS_00003027	1	151291828	151292189	+	null					Not found	0	-0.555659	-0.883703	-0.800964	-0.60586
TCONS_00003029	1	151310697	151312598	+	Y_RNA	ENSMUSG00000089221	Y RNA [Source:RFAM;Acc:RF00019]	+	gene	downstream	949	-0.555659	-0.304714	0.602668	-0.0298587
NOMERGE_TCONS_00000071	1	151343905	151344736	-	Ivns1abp	ENSMUSG00000023150	influenza virus NS1A binding protein [Source:MGI Symbol;Acc:MGI:2152389]	+	gene	overlapping	0	-0.555659	-0.833035	-0.750297	-0.529859
TCONS_00003033	1	151344480	151364445	+	Ivns1abp	ENSMUSG00000023150	influenza virus NS1A binding protein [Source:MGI Symbol;Acc:MGI:2152389]	+	gene	overlapping	0	4.32916	4.66477	3.73913	4.39636
TCONS_00006914	1	151367699	151428684	-	1200016B10Rik	ENSMUSG00000052748	RIKEN cDNA 1200016B10 gene [Source:MGI Symbol;Acc:MGI:1914125]	-	gene	overlapping	0	7.05683	7.24685	7.22507	7.55819
TCONS_00003034	1	151424504	151424746	+	1200016B10Rik	ENSMUSG00000052748	RIKEN cDNA 1200016B10 gene [Source:MGI Symbol;Acc:MGI:1914125]	-	gene	overlapping	0	-0.555659	-0.883703	-0.800964	-0.60586
TCONS_00003035	1	151428560	151458182	+	1190005F20Rik	ENSMUSG00000053286	RIKEN cDNA 1190005F20 gene [Source:MGI Symbol;Acc:MGI:1916185]	+	gene	overlapping	0	4.80339	4.58059	5.09238	4.83154
TCONS_00006916	1	151469402	151501022	-	Rnf2	ENSMUSG00000026484	ring finger protein 2 [Source:MGI Symbol;Acc:MGI:1101759]	-	gene	overlapping	0	7.32569	7.41564	7.87506	7.84295
TCONS_00006917	1	151506513	151506785	-	null					Not found	0	-0.555659	-0.883703	-0.800964	-0.60586
TCONS_00003037	1	151607727	151608693	+	Fam129a	ENSMUSG00000026483	family with sequence similarity 129, member A [Source:MGI Symbol;Acc:MGI:2137237]	+	gene	overlapping	0	-0.555659	-0.883703	-0.800964	-0.60586
TCONS_00003038	1	151644944	151719539	+	Fam129a	ENSMUSG00000026483	family with sequence similarity 129, member A [Source:MGI Symbol;Acc:MGI:2137237]	+	gene	overlapping	0	-0.504991	-0.304714	-0.315628	-0.0298587
TCONS_00006918	1	151691417	151691491	-	Fam129a	ENSMUSG00000026483	family with sequence similarity 129, member A [Source:MGI Symbol;Acc:MGI:2137237]	+	gene	overlapping	0	-0.555659	-0.883703	-0.800964	-0.60586
TCONS_00003040	1	151724448	151725380	+	null					Not found	0	-0.555659	-0.883703	-0.800964	-0.60586
TCONS_00006919	1	151732711	151733693	-	null					Not found	0	-0.555659	-0.883703	-0.800964	-0.60586
TCONS_00006921	1	151749387	151750153	-	null					Not found	0	-0.555659	-0.883703	-0.800964	-0.60586
TCONS_00003042	1	151755140	151822328	+	Edem3	ENSMUSG00000043019	ER degradation enhancer, mannosidase alpha-like 3 [Source:MGI Symbol;Acc:MGI:1914217]	+	gene	overlapping	0	4.34672	4.96664	4.3256	4.56834
TCONS_00003045	1	151863426	151865974	+	null					Not found	0	-0.555659	-0.883703	-0.800964	-0.60586
TCONS_00003047	1	151875323	151884507	+	1700025G04Rik	ENSMUSG00000032666	RIKEN cDNA 1700025G04 gene [Source:MGI Symbol;Acc:MGI:1916649]	-	gene	upstream	17	-0.555659	-0.883703	-0.800964	-0.529859
TCONS_00006927	1	151884524	152090380	-	1700025G04Rik	ENSMUSG00000032666	RIKEN cDNA 1700025G04 gene [Source:MGI Symbol;Acc:MGI:1916649]	-	gene	overlapping	0	4.65405	4.70026	4.65708	4.40412
TCONS_00003048	1	152314036	152316919	+	null					Not found	0	-0.555659	-0.254046	-0.800964	-0.0298587
TCONS_00006929	1	152331231	152333699	-	null					Not found	0	-0.555659	-0.883703	-0.750297	-0.0298587
CUFF.2669.1	1	152332270	152332912	+	null					Not found	0	-0.555659	-0.883703	-0.800964	-0.60586
TCONS_00003049	1	152333561	152337792	+	null					Not found	0	-0.171658	-0.833035	-0.800964	0.262622
TCONS_00003053	1	152340201	152353347	+	null					Not found	0	-0.12099	0.708943	0.495359	0.707107
TCONS_00006932	1	152370735	152386682	-	Tsen15	ENSMUSG00000014980	tRNA splicing endonuclease 15 homolog (S. cerevisiae) [Source:MGI Symbol;Acc:MGI:1913887]	-	gene	overlapping	0	-0.504991	-0.883703	-0.800964	-0.60586
TCONS_00003056	1	152373712	152383336	+	Tsen15	ENSMUSG00000014980	tRNA splicing endonuclease 15 homolog (S. cerevisiae) [Source:MGI Symbol;Acc:MGI:1913887]	-	gene	overlapping	0	-0.504991	-0.499701	-0.315628	-0.453857
TCONS_00003059	1	152399830	152511182	+	Glt25d2	ENSMUSG00000032649	glycosyltransferase 25 domain containing 2 [Source:MGI Symbol;Acc:MGI:2138232]	+	gene	overlapping	0	4.21661	5.15333	3.80634	6.61592
TCONS_00006933	1	152431109	152438057	-	Glt25d2	ENSMUSG00000032649	glycosyltransferase 25 domain containing 2 [Source:MGI Symbol;Acc:MGI:2138232]	+	gene	overlapping	0	0.791332	2.09892	2.6223	5.11078
TCONS_00006939	1	152516759	152766351	-	Rgl1	ENSMUSG00000026482	ral guanine nucleotide dissociation stimulator,-like 1 [Source:MGI Symbol;Acc:MGI:107484]	-	gene	overlapping	0	3.74191	3.99942	3.10527	4.39027
TCONS_00003064	1	152548537	152550231	+	Rgl1	ENSMUSG00000026482	ral guanine nucleotide dissociation stimulator,-like 1 [Source:MGI Symbol;Acc:MGI:107484]	-	gene	overlapping	0	1.23197	2.95722	2.16811	1.33862
TCONS_00003065	1	152677002	152686838	+	Rgl1	ENSMUSG00000026482	ral guanine nucleotide dissociation stimulator,-like 1 [Source:MGI Symbol;Acc:MGI:107484]	-	gene	overlapping	0	1.56531	1.03744	1.87179	1.54614
TCONS_00003069	1	152766457	152775597	+	Arpc5	ENSMUSG00000008475	actin related protein 2/3 complex, subunit 5 [Source:MGI Symbol;Acc:MGI:1915021]	+	gene	overlapping	0	3.45296	3.57805	2.50281	3.39982
TCONS_00006943	1	152777310	152777500	-	Arpc5	ENSMUSG00000008475	actin related protein 2/3 complex, subunit 5 [Source:MGI Symbol;Acc:MGI:1915021]	+	gene	upstream	1713	-0.555659	-0.883703	-0.800964	-0.60586
TCONS_00003070	1	152807873	152836990	+	Ncf2	ENSMUSG00000026480	neutrophil cytosolic factor 2 [Source:MGI Symbol;Acc:MGI:97284]	+	gene	overlapping	0	-0.555659	-0.883703	-0.699629	-0.529859
TCONS_00006949	1	152836952	152902737	-	Ncf2	ENSMUSG00000026480	neutrophil cytosolic factor 2 [Source:MGI Symbol;Acc:MGI:97284]	+	gene	overlapping	0	6.03199	6.36584	6.76181	6.28981
TCONS_00006950	1	152902796	152903279	-	Smg7	ENSMUSG00000042772	Smg-7 homolog, nonsense mediated mRNA decay factor (C. elegans) [Source:MGI Symbol;Acc:MGI:2682334]	-	gene	downstream	150	0.212343	-0.304714	-0.800964	-0.529859
TCONS_00006951	1	152930448	152934722	-	null					Not found	0	-0.555659	-0.883703	-0.750297	-0.529859
TCONS_00003073	1	152955101	153119260	+	Nmnat2	ENSMUSG00000042751	nicotinamide nucleotide adenylyltransferase 2 [Source:MGI Symbol;Acc:MGI:2444155]	+	gene	overlapping	0	3.91344	4.7472	4.40862	4.34517
CUFF.2693.1	1	153082768	153083163	-	Nmnat2	ENSMUSG00000042751	nicotinamide nucleotide adenylyltransferase 2 [Source:MGI Symbol;Acc:MGI:2444155]	+	gene	overlapping	0	-0.555659	-0.883703	-0.800964	-0.60586
TCONS_00006954	1	153122754	153218053	-	Lamc2	ENSMUSG00000026479	laminin, gamma 2 [Source:MGI Symbol;Acc:MGI:99913]	-	gene	overlapping	0	5.28435	5.8367	5.47383	5.15814
TCONS_00003085	1	153216762	153218917	+	Lamc1	ENSMUSG00000026478	laminin, gamma 1 [Source:MGI Symbol;Acc:MGI:99914]	-	gene	upstream	5	2.11709	2.87926	3.39413	2.92359
TCONS_00006956	1	153218922	153333145	-	Lamc1	ENSMUSG00000026478	laminin, gamma 1 [Source:MGI Symbol;Acc:MGI:99914]	-	gene	overlapping	0	5.6256	5.74935	5.92371	6.29245
ENSMUST00000110797	1	153305432	153306478	+	Lamc1	ENSMUSG00000026478	laminin, gamma 1 [Source:MGI Symbol;Acc:MGI:99914]	-	gene	overlapping	0	-0.555659	-0.883703	-0.800964	-0.60586
TCONS_00006957	1	153377875	153381887	-	null					Not found	0	-0.555659	-0.883703	-0.800964	-0.60586
TCONS_00003086	1	153382411	153387798	+	null					Not found	0	5.55697	5.2056	6.32035	6.67284
TCONS_00003087	1	153398349	153403040	+	E330020D12Rik	ENSMUSG00000073538	Riken cDNA E330020D12 gene [Source:MGI Symbol;Acc:MGI:3761270]	-	gene	upstream	1787	1.84797	1.09892	2.01771	0.0461428
TCONS_00006958	1	153404357	153408429	-	E330020D12Rik	ENSMUSG00000073538	Riken cDNA E330020D12 gene [Source:MGI Symbol;Acc:MGI:3761270]	-	gene	overlapping	0	1.1443	1.37561	1.01771	2.99959
TCONS_00003090	1	153425083	153452583	+	1700012A16Rik	ENSMUSG00000042708	RIKEN cDNA 1700012A16 gene [Source:MGI Symbol;Acc:MGI:1919086]	+	gene	overlapping	0	3.45925	3.29055	2.79766	4.37346
TCONS_00006960	1	153434536	153434705	-	1700012A16Rik	ENSMUSG00000042708	RIKEN cDNA 1700012A16 gene [Source:MGI Symbol;Acc:MGI:1919086]	+	gene	overlapping	0	-0.555659	-0.883703	-0.800964	-0.60586
TCONS_00006964	1	153455758	153488889	-	Dhx9	ENSMUSG00000042699	DEAH (Asp-Glu-Ala-His) box polypeptide 9 [Source:MGI Symbol;Acc:MGI:108177]	-	gene	overlapping	0	5.32611	5.71387	5.54913	6.07994
TCONS_00006965	1	153503016	153549714	-	Npl	ENSMUSG00000042684	N-acetylneuraminate pyruvate lyase [Source:MGI Symbol;Acc:MGI:1921341]	-	gene	overlapping	0	-0.555659	-0.883703	-0.800964	-0.60586
TCONS_00003092	1	153548687	153548946	+	Npl	ENSMUSG00000042684	N-acetylneuraminate pyruvate lyase [Source:MGI Symbol;Acc:MGI:1921341]	-	gene	overlapping	0	-0.555659	-0.883703	-0.800964	-0.60586
TCONS_00003093	1	153586337	153588218	+	null					Not found	0	-0.555659	-0.304714	-0.800964	-0.60586
TCONS_00006967	1	153592339	153592817	-	null					Not found	0	-0.555659	-0.499701	-0.800964	-0.60586
TCONS_00003094	1	153664616	153693005	+	Rgs8	ENSMUSG00000042671	regulator of G-protein signaling 8 [Source:MGI Symbol;Acc:MGI:108408]	+	gene	overlapping	0	-0.555659	-0.883703	-0.750297	-0.0298587
TCONS_00003097	1	153714928	153716570	+	null					Not found	0	0.457998	0.934967	0.0177054	2.42359
TCONS_00003098	1	153740349	153745468	+	Rgs16	ENSMUSG00000026475	regulator of G-protein signaling 16 [Source:MGI Symbol;Acc:MGI:108407]	+	gene	overlapping	0	-0.555659	-0.883703	-0.800964	-0.529859
TCONS_00003100	1	153749426	153764221	+	Rnasel	ENSMUSG00000066800	ribonuclease L (2', 5'-oligoisoadenylate synthetase-dependent) [Source:MGI Symbol;Acc:MGI:1098272]	+	gene	overlapping	0	-0.504991	-0.883703	-0.800964	-0.60586
TCONS_00006972	1	153778824	153845346	-	Rgsl1	ENSMUSG00000042641	regulator of G-protein signaling like 1 [Source:MGI Symbol;Acc:MGI:2685048]	-	gene	overlapping	0	1.23197	0.853263	2.96829	2.53478
NOMERGE_TCONS_00000072	1	153846181	153900208	-	5830403L16Rik	ENSMUSG00000045968	RIKEN cDNA 5830403L16 gene [Source:MGI Symbol;Acc:MGI:1923273]	-	gene	overlapping	0	-0.555659	-0.499701	-0.800964	-0.60586
TCONS_00003102	1	153851520	153851869	+	5830403L16Rik	ENSMUSG00000045968	RIKEN cDNA 5830403L16 gene [Source:MGI Symbol;Acc:MGI:1923273]	-	gene	overlapping	0	-0.555659	-0.883703	-0.800964	-0.60586
TCONS_00003105	1	153899901	153916910	+	5830403L16Rik	ENSMUSG00000045968	RIKEN cDNA 5830403L16 gene [Source:MGI Symbol;Acc:MGI:1923273]	-	gene	overlapping	0	2.6038	2.32494	2.936	4.21829
TCONS_00006982	1	153910443	153912559	-	A930039A15Rik	ENSMUSG00000078493	RIKEN cDNA A930039A15 gene [Source:MGI Symbol;Acc:MGI:3641728]	+	gene	overlapping	0	-0.555659	-0.833035	-0.800964	-0.60586
TCONS_00003108	1	153929927	153931571	+	null					Not found	0	-0.555659	-0.883703	-0.800964	-0.60586
TCONS_00006983	1	154025974	154027295	-	null					Not found	0	-0.555659	-0.883703	-0.800964	-0.60586
TCONS_00006984	1	154088639	154089336	-	null					Not found	0	-0.555659	-0.883703	-0.800964	-0.60586
TCONS_00003109	1	154095739	154096301	+	null					Not found	0	-0.555659	-0.883703	-0.800964	-0.60586
TCONS_00006985	1	154102337	154103200	-	null					Not found	0	-0.555659	-0.883703	-0.800964	-0.60586
TCONS_00006986	1	154107070	154112328	-	null					Not found	0	2.56531	3.76475	2.21269	4.18884
TCONS_00003110	1	154111311	154111918	+	null					Not found	0	-0.555659	-0.883703	-0.800964	-0.60586
TCONS_00006988	1	154113130	154113321	-	null					Not found	0	-0.555659	0.601634	-0.315628	0.262622
TCONS_00003111	1	154347138	154348389	+	null					Not found	0	-0.171658	-0.782367	-0.750297	0.470141
TCONS_00006991	1	154394729	154767132	-	Cacna1e	ENSMUSG00000004110	calcium channel, voltage-dependent, R type, alpha 1E subunit [Source:MGI Symbol;Acc:MGI:106217]	-	gene	overlapping	0	2.58877	2.49421	2.91379	2.77586
TCONS_00003113	1	154774736	154778146	+	null					Not found	0	-0.555659	-0.883703	-0.800964	-0.60586
TCONS_00006998	1	155063523	155083266	-	null					Not found	0	-0.555659	-0.883703	-0.800964	-0.60586
TCONS_00006999	1	155096367	155099636	-	Ier5	ENSMUSG00000056708	immediate early response 5 [Source:MGI Symbol;Acc:MGI:1337072]	-	gene	overlapping	0	-0.555659	-0.883703	-0.800964	-0.60586
TCONS_00007000	1	155158033	155158384	-	Stx6	ENSMUSG00000026470	syntaxin 6 [Source:MGI Symbol;Acc:MGI:1926235]	+	gene	downstream	319	-0.555659	-0.883703	-0.800964	-0.60586
TCONS_00003116	1	155158576	155205581	+	Stx6	ENSMUSG00000026470	syntaxin 6 [Source:MGI Symbol;Acc:MGI:1926235]	+	gene	overlapping	0	5.58258	4.78006	5.53939	4.92108
TCONS_00007001	1	155192307	155192469	-	Stx6	ENSMUSG00000026470	syntaxin 6 [Source:MGI Symbol;Acc:MGI:1926235]	+	gene	overlapping	0	-0.555659	-0.883703	-0.800964	-0.60586
TCONS_00007002	1	155206892	155208066	-	null					Not found	0	-0.555659	-0.883703	-0.800964	-0.60586
TCONS_00007004	1	155210328	155242330	-	BC034090	ENSMUSG00000033722	cDNA sequence BC034090 [Source:MGI Symbol;Acc:MGI:2672904]	-	gene	overlapping	0	4.32526	4.61283	3.51348	4.1082
TCONS_00007010	1	155255390	155257019	-	null					Not found	0	-0.555659	-0.833035	-0.750297	-0.60586
TCONS_00007011	1	155262698	155262764	-	null					Not found	0	-0.555659	-0.883703	-0.800964	-0.60586
TCONS_00007015	1	155275701	155417415	-	Xpr1	ENSMUSG00000026469	xenotropic and polytropic retrovirus receptor 1 [Source:MGI Symbol;Acc:MGI:97932]	-	gene	overlapping	0	5.4791	5.10134	5.46206	5.08321
[truncated: 36,541 more rows]

## Sheet: cDKO DEGs Log2FC>1.5 Clusters
Probe	Chromosome	Start	End	Probe.Strand	Overlapping Gene	ID	P.value	FDR	Log2FC	Ehmt2 Control	Ehmt2 cKO	Ehmt1/2 Control	Ehmt1/2 cDKO	Cluster	Oocyte function
TCONS_00095260	7	118535843	118584736	-	Tmc7	ENSMUSG00000042246	0.000357	0.0134971	-5.95335	2.42696	-0.254046	2.9508	-0.60586	1
NOMERGE_TCONS_00001204	4	108622929	108625216	-	Cc2d1b	ENSMUSG00000028582	0.00146059	0.0398831	-5.10527	-0.555659	-0.254046	3.44211	-0.529859	1
TCONS_00028662	13	6019540	6029004	-	null		0.00194006	0.0495872	-4.93961	2.9061	2.37335	3.4176	-0.529859	1
TCONS_00022000	12	37589330	37598113	+	null		1.21e-06	0.000136	-4.60968	3.80613	2.04228	4.66153	0.0461428	1
TCONS_00097385	8	70152738	70167488	+	2310045N01Rik	ENSMUSG00000002345	1.28e-05	0.000953	-3.90161	3.50195	1.37561	4.34263	0.470141	1
TCONS_00047501	17	25565888	25570729	-	Sox8	ENSMUSG00000024176	0.000114	0.00550237	-3.09467	4.39952	2.43624	4.11958	1.04614	1	Transcription factor; nothing known for oocytes
TCONS_00035444	14	70583166	70599843	-	Fam160b2	ENSMUSG00000022095	0.000833	0.0260835	-2.98008	2.87292	1.23726	3.74796	0.546143	1
TCONS_00096800	8	33516621	33585582	+	Tex15	ENSMUSG00000009628	1.65e-26	8.57e-23	-2.89111	7.1019	4.54302	7.42209	4.57514	1	Male meiosis gene (Yang et al. 2008)
TCONS_00055154	19	45232688	45236836	-	Lbx1	ENSMUSG00000025216	1.33e-07	2.09e-05	-2.61811	5.01285	4.89413	5.30625	2.77586	1	Transcription factor; nothing known for oocytes
TCONS_00001186	1	60584135	60607054	+	null		0.00171071	0.0449413	-2.43737	0.596344	0.274275	3.88403	1.63111	1
TCONS_00101364	8	109447222	109450559	-	null		0.000406	0.0149954	-2.43515	3.6084	3.01721	4.19645	1.83862	1
TCONS_00108264	X	23875896	23912489	+	Gm4907	ENSMUSG00000068113	0.000254	0.0103479	-2.41239	4.1669	2.28036	4.6371	1.39636	1
TCONS_00109830	X	105926698	105933846	+	Atrx	ENSMUSG00000031229	0.000255	0.0103594	-2.29826	3.9629	3.09775	4.55348	1.83862	1	Oocyte meiosis gene (Baumann et al. 2010)
TCONS_00104986	9	8021523	8042881	-	9230110C19Rik	ENSMUSG00000053070	0.000289	0.0115191	-2.24872	4.53497	3.82341	4.41974	2.13111	1
TCONS_00059817	2	24790769	24919653	-	Ehmt1	ENSMUSG00000036893	3.12e-11	1.38e-08	-2.14694	5.99608	6.17284	6.29371	4.21829	1	GLP
TCONS_00089842	7	24610758	24629300	+	Phldb3	ENSMUSG00000074277	8.52e-05	0.00440592	-2.11846	3.90684	1.83972	4.75466	2.70711	1
TCONS_00070865	4	102986585	103004292	+	Gm12709	ENSMUSG00000085181	2.72e-05	0.0017782	-2.10356	3.72712	2.87289	4.95132	2.93682	1
TCONS_00082981	5	129676231	129710768	-	2014-09-01	ENSMUSG00000034219	0.000326	0.0125628	-2.03242	4.26474	2.51993	4.66882	2.44982	1
TCONS_00022305	12	57564113	57737928	+	4921506M07Rik	ENSMUSG00000046782	1.28e-05	0.000955	-1.9505	5.11968	4.98223	5.27679	3.29207	1
TCONS_00088616	6	124864692	124897581	-	Cd4	ENSMUSG00000023274	0.00130966	0.0371277	-1.93822	3.93377	2.59406	4.31157	2.44982	1
TCONS_00086473	6	6041217	6174160	-	Slc25a13	ENSMUSG00000015112	0.000424	0.0155495	-1.91009	4.4864	2.59406	4.69248	2.7423	1
TCONS_00038089	15	99373482	99379943	+	null		0.00109444	0.0321029	-1.87897	3.99501	3.60503	4.47892	2.71607	1
TCONS_00071908	4	138972892	139059171	+	Tmco4	ENSMUSG00000041143	0.000314	0.0122176	-1.84994	4.52017	4.2274	4.77252	2.94982	1
TCONS_00088836	6	134997700	135006348	-	null		1.67e-06	0.000179	-1.80494	5.25376	4.95861	5.81567	4.07378	1
TCONS_00107533	9	114789345	114844152	-	Cmtm8	ENSMUSG00000041012	1.81e-09	5.02e-07	-1.74697	6.01809	5.47131	6.49025	4.77688	1
TCONS_00016947	11	104607579	104674277	+	Itgb3	ENSMUSG00000020689	4.2e-10	1.41e-07	-1.73238	5.75881	5.3636	6.51205	4.84424	1
TCONS_00030225	13	63479778	63501433	-	Fancc	ENSMUSG00000021461	0.000868	0.0268467	-1.64103	4.26113	3.24718	4.8234	3.17484	1
TCONS_00012050	10	43525121	43541033	-	1700021F05Rik	ENSMUSG00000019797	0.000763	0.0242921	-1.60439	4.7755	4.44705	4.83777	3.29207	1
TCONS_00079136	5	122206751	122242297	+	Hvcn1	ENSMUSG00000064267	5.06e-07	6.61e-05	-1.60147	6.07848	5.52932	6.13015	4.60431	1
TCONS_00014514	11	10841011	10850045	+	null		6.67e-06	0.000555	1.50582	4.10514	4.85834	4.45398	6.04966	2
TCONS_00069344	4	11734358	11817895	+	Cdh17	ENSMUSG00000028217	0.00103113	0.0308745	1.5223	3.98975	3.65324	3.57163	5.21272	2
TCONS_00055996	2	27676440	27762957	+	Rxra	ENSMUSG00000015846	2.6e-08	5.09e-06	1.55041	4.34859	4.67761	5.07321	6.67358	2	Transcription factor; nothing known for oocytes
TCONS_00054858	19	32122727	32388512	-	Sgms1	ENSMUSG00000040451	5.3e-09	1.29e-06	1.55732	4.93154	5.42193	5.06646	6.69557	2
TCONS_00041014	16	13109356	13151983	+	Ercc4	ENSMUSG00000022545	2.69e-05	0.00176328	1.57271	3.68644	4.83571	4.07995	5.72794	2	Catalytic component of a structure-specific DNA repair endonuclease; nothing known for oocytes
TCONS_00038572	15	16853042	16858776	-	Cdh9	ENSMUSG00000025370	0.00140386	0.0388446	1.57953	2.66044	3.68782	3.21269	4.93846	2
TCONS_00000148	1	10993465	11303682	+	Prex2	ENSMUSG00000048960iption=phosphatidylinositol-3,4,5-trisphosphate-dependentRac exchange factor 2 [Source:MGI Symbol;Acc:MGI:1923385]	1.53e-09	4.36e-07	1.59105	4.7755	5.67571	5.22366	6.934	2
TCONS_00057779	2	125994244	126091185	+	4930525F21Rik	ENSMUSG00000027209	1.3e-05	0.000962	1.61111	4.08145	4.5193	4.04331	5.72189	2
TCONS_00109226	X	72824457	72842603	+	Gabrq	ENSMUSG00000031344	0.00102998	0.0308745	1.61154	3.6084	3.91139	3.22749	4.95543	2
TCONS_00098727	8	121730357	121790806	+	Gm20388	ENSMUSG00000092329	0.00166009	0.043833	1.6274	2.58011	3.12238	3.04331	4.75507	2
TCONS_00075699	4	143594788	143601010	-	null		0.00101171	0.0305127	1.62902	2.23197	3.4289	3.17662	4.88059	2
TCONS_00085807	6	118500234	118506414	+	Ankrd26	ENSMUSG00000007827	3.25e-06	0.000307	1.62909	4.06259	4.86878	4.25632	5.97241	2
TCONS_00112530	X	101731534	101734269	-	Cxcr3	ENSMUSG00000050232	0.000473	0.0168299	1.6345	3.73563	3.25738	3.36149	5.08321	2
NOMERGE_TCONS_00000070	1	150449412	150466165	-	Tpr	ENSMUSG00000006005	7.74e-05	0.00408289	1.63914	3.27047	3.24311	3.71989	5.42858	2
TCONS_00059792	2	24002910	24049475	-	Hnmt	ENSMUSG00000026986	0.000309	0.0120958	1.67506	3.61477	3.65994	3.37664	5.12985	2	Histamine N-methyltransferase; nothing known for oocytes
TCONS_00108915	X	48694911	48710723	+	Rbmx2	ENSMUSG00000031107	0.000136	0.00630739	1.68825	4.00895	4.49244	3.62827	5.33933	2	Involved in pre-mRNA splicing as component of the activated spliceosome; nothing known for oocytes
TCONS_00110128	X	139480367	139554588	+	D330045A20Rik	ENSMUSG00000042498	6.47e-05	0.00351851	1.70005	3.32711	4.3472	3.70359	5.45303	2
TCONS_00075103	4	127877927	127911239	-	null		0.000142	0.00654609	1.70305	2.95528	4.07386	3.47315	5.29482	2
TCONS_00001867	1	88614006	88622046	+	null		0.000241	0.00996148	1.73711	2.51129	2.20409	3.34347	5.11783	2
TCONS_00112416	X	95960470	95973407	-	null		1.24e-05	0.000928	1.75404	3.45894	3.84823	3.7626	5.60106	2
TCONS_00053586	19	44202842	44264248	+	Scd3	ENSMUSG00000025202	1.24e-07	1.96e-05	1.76095	4.06259	4.88459	4.2596	6.09203	2
TCONS_00105262	9	20345136	20385259	-	Zfp560	ENSMUSG00000045519	2.15e-05	0.00147614	1.76473	3.99501	4.66748	3.69643	5.51483	2
TCONS_00061280	2	95069173	95184611	-	null		0.00128173	0.0366273	1.7746	1.63944	3.43525	2.83752	4.69575	2
TCONS_00084165	6	34354119	34368463	+	Akr1b8	ENSMUSG00000029762	8.18e-09	1.81e-06	1.80685	4.24189	3.3541	4.42111	6.29432	2
TCONS_00064454	3	62338344	62462221	+	Arhgef26	ENSMUSG00000036885	9.35e-05	0.0047373	1.83885	2.63944	3.70988	3.30783	5.28704	2
TCONS_00073703	4	55527113	55532633	-	Klf4	ENSMUSG00000003032	1.68e-06	0.00018	1.86284	4.15624	4.61733	3.7898	5.7223	2	Transcription factor (reprogramming) (Niwa et al. 2009)
TCONS_00028579	13	120009990	120308764	+	AC238811.4	ENSMUSG00000095379	7.11e-05	0.00379793	1.8931	3.16084	3.9453	3.5306	5.385	2
TCONS_00069461	4	15879082	15908064	+	Calb1	ENSMUSG00000028222	8.77e-09	1.88e-06	1.91606	4.47112	4.15318	4.38656	6.38533	2
TCONS_00032664	14	50935253	50965237	+	Pnp	ENSMUSG00000021871	2.09e-09	5.71e-07	1.93088	4.50855	5.20902	4.37789	6.38616	2
NOMERGE_TCONS_00001627	8	106237903	106425728	-	Prmt7	ENSMUSG00000060098	0.000672	0.0220699	1.96137	3.34546	2.76958	2.56082	4.57378	2	Transcription factor; Reported as a potential oocyte-expressed reprogramming factor (Wang et al. 2016)
TCONS_00014994	11	34047201	34092295	+	4930469K13Rik	ENSMUSG00000085684	3.25e-05	0.00202473	2.01252	3.1443	3.40776	3.15944	5.43354	2
TCONS_00011377	10	12125169	12135058	-	null		3.77e-06	0.000345	2.03234	2.65299	4.42823	3.38721	5.71551	2
TCONS_00051308	18	20636105	20638983	-	Gm16090	ENSMUSG00000085595	6.59e-09	1.53e-06	2.0509	4.58108	4.34457	4.01759	6.1986	2
TCONS_00088736	6	129300670	129301825	-	null		0.00101621	0.0306041	2.06262	2.46545	3.17305	2.22749	4.47669	2
TCONS_00097271	8	61928087	62037701	+	Ddx60	ENSMUSG00000037921	6.68e-06	0.000555	2.11003	2.54693	1.23726	3.07247	5.27304	2
TCONS_00061303	2	96298736	96304337	-	null		0.00115227	0.0333378	2.11213	0.0739973	1.96057	2.09398	4.30004	2
TCONS_00091935	7	120102369	120120992	+	Tmem159	ENSMUSG00000030917	0.000212	0.00899981	2.18492	1.074	1.96589	2.3348	4.63298	2
CUFF.5056.1	10	73640109	73642431	-	Pcdh15	ENSMUSG00000052613	0.000729	0.0234389	2.2176	1.31965	2.20623	1.99264	4.44982	2
TCONS_00008913	10	45178098	45318452	+	Popdc3	ENSMUSG00000019848	0.000392	0.0145861	2.23426	2.09363	3.14959	2.11284	4.53977	2
TCONS_00014832	11	25241482	25244608	+	null		0.000375	0.0140812	2.23802	1.12467	2.69677	2.14848	4.44578	2
TCONS_00112916	X	135768447	135773373	-	Gprasp1	ENSMUSG00000043384	3.94e-07	5.31e-05	2.23963	2.96411	3.07425	3.27925	5.59351	2
TCONS_00095777	7	138208973	138397728	-	Tcerg1l	ENSMUSG00000091002	0.000582	0.0197121	2.24207	2.55313	3.25206	2.0608	4.3405	2
TCONS_00087652	6	76881496	77115072	-	Ctnna2	ENSMUSG00000063063	0.000467	0.0167478	2.24845	1.56531	3.34906	2.14848	4.90327	2
TCONS_00095149	7	112116019	112159737	-	Dkk3	ENSMUSG00000030772	0.000288	0.0115191	2.26385	0.791332	2.75204	2.13099	4.57514	2
TCONS_00060006	2	28907679	28918666	-	Barhl1	ENSMUSG00000026805	0.00061	0.0203923	2.26427	2.08008	-0.782367	1.94483	4.37346	2	Transcription factor; involved in neurogenesis; nothing known for oocytes
TCONS_00102841	9	45370048	45396159	+	Fxyd6	ENSMUSG00000066705	6.44e-08	1.15e-05	2.29742	3.27507	3.09388	3.23681	5.6226	2
TCONS_00032772	14	53590849	53595110	+	AC161872.3	ENSMUSG00000094966	0.000421	0.0154972	2.30853	1.18131	2.85326	2.08915	4.55315	2
TCONS_00040511	15	101884351	101892920	-	Krt76	ENSMUSG00000075402	3.68e-07	5.03e-05	2.31949	3.69741	3.2126	3.06677	5.63111	2
TCONS_00068760	3	134457784	134461483	-	null		9.06e-05	0.00465007	2.32183	1.97277	3.03756	2.27925	4.67011	2
TCONS_00005374	1	67203363	67207191	-	Cps1	ENSMUSG00000025991	0.00057	0.0194246	2.36024	1.7603	2.23223	1.84832	4.28603	2
TCONS_00094188	7	57008502	57016509	-	Gabrg3	ENSMUSG00000055026	9.31e-20	1.93e-16	2.36461	4.73808	5.37423	4.88912	7.36519	2
TCONS_00071571	4	131095265	131124237	+	null		0.00112937	0.0327768	2.36852	2.42696	0.570597	1.68437	4.13111	2
TCONS_00095047	7	109034312	109094591	-	Tub	ENSMUSG00000031028	2.59e-09	6.82e-07	2.37136	2.97277	4.38895	3.42248	5.91032	2	Transcription factor; Involved in photoreceptor survival; nothing known for oocytes
TCONS_00041426	16	28781784	28784679	+	null		0.00102193	0.0306874	2.3723	0.124665	0.796621	1.60267	4.17011	2
TCONS_00006933	1	152431109	152438057	-	Glt25d2	ENSMUSG00000032649	4.52e-06	0.000407	2.39326	0.791332	2.09892	2.6223	5.11078	2
TCONS_00095553	7	127718106	127729229	-	Ctf1	ENSMUSG00000042340	0.000745	0.023826	2.41348	0.703654	2.51993	1.60267	4.18884	2
TCONS_00102433	9	22225677	22243343	+	Zfp809	ENSMUSG00000057982	0.00156488	0.0417971	2.43051	1.39378	1.43225	1.35104	4.11975	2	KRAB Zinc finger protein; required for ERV repression; nothing known for oocytes
TCONS_00091576	7	104218779	104235152	+	Trim6	ENSMUSG00000072244	0.000178	0.00782926	2.46783	1.84797	2.32494	1.56082	4.60431	2
TCONS_00080865	5	39975667	39985621	-	null		7.25e-07	9.02e-05	2.48203	3.04296	3.97049	2.66079	5.30694	2
TCONS_00052041	18	62478812	62491923	-	null		0.000927	0.0283212	2.52923	1.31965	2.63606	1.45835	4.01886	2
TCONS_00040508	15	101793302	101802343	-	Krt73	ENSMUSG00000063661	3.53e-05	0.00217769	2.57381	0.847973	1.32494	2.12501	4.80103	2
TCONS_00038839	15	34794831	34860498	-	Kcns2	ENSMUSG00000050963	1.89e-07	2.81e-05	2.57892	2.39378	2.19542	2.93265	5.48017	2
TCONS_00041029	16	13903161	13950842	+	Mpv17l	ENSMUSG00000022679	3.78e-05	0.0023053	2.58892	0.898641	2.9744	2.0325	4.67543	2
TCONS_00055500	2	3114224	3227806	+	Fam171a1	ENSMUSG00000050530	0.000237	0.00981711	2.60159	1.9221	1.43225	1.65334	4.27175	2
TCONS_00035190	14	59347407	59366028	-	D14Ertd668e	ENSMUSG00000068245	4.57e-05	0.00271049	2.60185	1.51464	2.20623	1.87936	4.58788	2
TCONS_00004505	1	30673609	30682609	-	null		1.43e-06	0.000157	2.60954	2.6038	2.41387	2.35849	5.08455	2
TCONS_00005826	1	87086690	87089977	-	Alppl2	ENSMUSG00000026246	0.00104123	0.0309316	2.6246	0.596344	0.708943	1.21269	3.89982	2
TCONS_00031171	13	105486012	105492973	-	null		6.34e-06	0.000531	2.6452	2.51464	2.12238	2.21394	4.89027	2
TCONS_00100154	8	43907321	43912195	-	null		2.65e-10	1.02e-07	2.65097	2.31965	4.28219	3.33698	6.03353	2
TCONS_00010903	10	126785503	126795242	+	null		0.000558	0.0191096	2.69672	0.898641	1.60163	1.14848	4.06834	2
TCONS_00003059	1	152399830	152511182	+	Glt25d2	ENSMUSG00000032649	2.59e-15	2.56e-12	2.70464	4.21661	5.15333	3.80634	6.61592	2
TCONS_00066421	3	9972577	9977860	-	null		0.000209	0.00891167	2.7317	0.929678	2.01124	1.32	4.21829	2
TCONS_00064322	3	54361109	54391034	+	Postn	ENSMUSG00000027750	0.000524	0.0182106	2.77067	2.1443	1.70894	0.87936	4.11975	2
TCONS_00001339	1	67581570	67587036	+	null		0.00147019	0.0400642	2.78258	-0.12099	1.83972	0.986669	3.6842	2
TCONS_00097418	8	70697739	70702738	+	Jund	ENSMUSG00000071076	2.96e-05	0.001892	2.8093	1.51464	3.03756	1.58912	4.52179	2
TCONS_00057753	2	123358717	123368733	+	null		0.00168621	0.0444662	2.83212	0.791332	1.53742	0.741014	3.66055	2
TCONS_00113151	X	152079045	152083995	-	null		0.00116948	0.0337524	2.83512	1.34312	1.32494	0.828692	3.94982	2
TCONS_00056240	2	33521215	33525483	+	null		3.03e-05	0.00192412	2.84293	1.03699	0.217633	1.45835	4.52179	2
TCONS_00018416	11	40350562	40359649	-	null		0.000377	0.0140842	2.93375	-0.12099	-0.499701	0.986669	3.95303	2
TCONS_00004228	1	15205789	15212882	-	null		0.000401	0.0148407	2.96411	-0.12099	2.19542	0.87936	3.92359	2
TCONS_00034911	14	49680443	49783394	-	3632451O06Rik	ENSMUSG00000036242	7.15e-07	9e-05	2.96476	1.63944	1.92356	1.80648	5.00557	2
TCONS_00036503	15	25984151	25998482	+	Zfp622	ENSMUSG00000052253	0.000628	0.0208303	2.99005	-0.12099	1.70894	0.936001	3.75084	2	KRAB Zinc finger protein
TCONS_00077173	5	37242075	37292132	+	Crmp1	ENSMUSG00000029121	7.14e-09	1.63e-06	2.99527	1.81096	2.30273	2.26933	5.37814	2
TCONS_00086662	6	18366478	18514869	-	Cttnbp2	ENSMUSG00000000416	8.17e-09	1.81e-06	3.08855	1.37032	2.99906	2.14848	5.29207	2
TCONS_00065899	3	137634389	137638030	+	null		0.00178319	0.0463184	3.08856	-0.555659	-0.00839104	0.351039	3.49355	2
CUFF.40012.1	6	136747236	136748275	+	Gucy2c	ENSMUSG00000042638	0.00108115	0.031777	3.10267	-0.555659	0.324942	0.495359	3.78603	2
TCONS_00004917	1	49292612	49299058	-	C230029F24Rik	ENSMUSG00000051616	6.98e-05	0.0037558	3.12596	-0.12099	1.46329	1.02368	4.34888	2
TCONS_00023055	12	96110251	96114218	+	null		2e-14	1.34e-11	3.15753	2.82982	2.69677	2.84999	6.21801	2
TCONS_00053039	19	18139572	18143059	+	null		0.000324	0.0125335	3.26269	-0.171658	1.73241	0.351039	3.86627	2
TCONS_00002746	1	134138644	134151540	+	Chit1	ENSMUSG00000026450	6.57e-05	0.00356474	3.31464	-0.403656	1.04228	0.741014	4.11078	2
TCONS_00070467	4	74013444	74189928	+	Frmd3	ENSMUSG00000049122	0.000704	0.0229252	3.3243	1.00978	1.45825	0.300371	3.77586	2
TCONS_00051452	18	31959234	31998953	-	Myo7b	ENSMUSG00000024388	0.0010034	0.0303504	3.33773	0.0233296	0.37561	0.0743471	3.71607	2
TCONS_00053367	19	36202586	36206143	+	null		8.33e-05	0.00432538	3.35634	0.0233296	-0.0650327	0.546026	4.06697	2
TCONS_00097673	8	83389867	83428552	+	Clgn	ENSMUSG00000002190	1.66e-05	0.00119106	3.36157	-0.12099	2.22096	0.791681	4.40068	2
TCONS_00056988	2	82943634	83009796	+	Fsip2	ENSMUSG00000075249	9.49e-05	0.00478469	3.41171	0.457998	2.09892	0.351039	4.09252	2
TCONS_00097098	8	45885446	45919569	+	Pdlim3	ENSMUSG00000031636	9.15e-06	0.000715	3.44635	0.87901	0.708943	0.684372	4.40327	2
TCONS_00061480	2	108832787	108838571	-	null		4.81e-05	0.00279813	3.46679	-0.12099	1.39907	0.602668	4.2194	2
TCONS_00053192	19	27217020	27249862	+	Vldlr	ENSMUSG00000024924	9.05e-06	0.000714	3.4778	0.263011	2.39041	0.684372	4.39289	2
TCONS_00051480	18	33381853	33390399	-	null		5.33e-09	1.29e-06	3.64613	0.0739974	1.4732	1.26933	5.21272	2
TCONS_00095395	7	125283973	125297465	-	null		2e-07	2.92e-05	3.80791	-0.555659	1.99161	0.653336	4.77175	2
TCONS_00031521	14	9018192	9024955	+	null		4.46e-19	7.72e-16	3.8301	1.70365	3.08054	2.45078	6.36355	2
TCONS_00086623	6	15637535	15639754	-	null		0.00054	0.0186201	3.8497	0.407331	0.934967	-0.171308	3.56834	2
NOMERGE_TCONS_00001782	X	20860511	20921004	-	Araf	ENSMUSG00000001127	0.00140965	0.038953	3.88238	-0.171658	-0.883702	-0.366296	3.34981	2
TCONS_00109288	X	73774374	73778925	+	Srpk3	ENSMUSG00000002007	0.00133954	0.0376156	4.00653	-0.555659	1.26073	-0.221976	3.40327	2
TCONS_00095799	7	139978932	139992548	-	Gm16201	ENSMUSG00000086742	6.17e-10	2.03e-07	4.05388	-0.555659	1.08811	1.07435	5.1874	2
TCONS_00009677	10	79716634	79736108	+	Hcn2	ENSMUSG00000020331	0.000901	0.0276702	4.05521	0.740664	-0.254046	-0.366296	3.40327	2
TCONS_00042434	16	93672175	93690990	+	Cbr3	ENSMUSG00000022947	3.92e-06	0.000356	4.09642	0.986319	0.41262	0.0743471	4.42692	2
TCONS_00110033	X	130655311	130665634	+	null		8.93e-06	0.000708	4.12604	0.212343	0.903931	0.0177054	4.1923	2
TCONS_00102617	9	33338138	33343184	+	null		1.09e-08	2.3e-06	4.15437	0.791332	1.59023	0.684372	4.9474	2
TCONS_00050289	18	53843792	53859880	+	null		5.02e-05	0.00289208	4.15807	-0.555659	-0.166368	-0.315628	3.92359	2
TCONS_00097914	8	93809966	93969388	+	Gnao1	ENSMUSG00000031748	0.000474	0.0168299	4.1894	0.457998	0.658276	-0.366296	3.52033	2
TCONS_00006070	1	101126382	101128076	-	null		6.64e-09	1.53e-06	4.19737	0.602318	2.57805	0.569489	5.09779	2
TCONS_00042922	16	16620008	16624170	-	null		1.18e-05	0.00089	4.24515	1.56531	3.65953	1.60267	6.42045	2
TCONS_00077431	5	53049353	53071664	+	Slc34a2	ENSMUSG00000029188	5.55e-06	0.000473	4.24892	0.0739973	-0.1157	-0.0329623	4.32726	2
TCONS_00011790	10	33706834	33710944	-	null		1.24e-05	0.000928	4.37874	0.407331	1.15342	-0.0329622	4.16055	2
TCONS_00052271	18	73928486	74064929	-	Mapk4	ENSMUSG00000024558	7.62e-05	0.00404024	4.51836	-0.555659	-0.833035	-0.366296	3.82726	2
TCONS_00053327	19	34192229	34240333	+	Stambpl1	ENSMUSG00000024776	3.14e-05	0.00197707	4.72393	-0.555659	1.31139	-0.221976	4.03478	2
TCONS_00017987	11	20252018	20260028	-	null		8.89e-13	4.86e-10	4.97715	0.212343	1.2683	0.546026	5.57107	2
TCONS_00000171	1	12692430	12861183	+	Sulf1	ENSMUSG00000016918	0.0016423	0.0435849	5.00364	-0.504991	0.796621	-0.750297	2.92359	2
TCONS_00056002	2	28042316	28051837	+	null		0.00104265	0.0309316	5.12592	-0.504991	0.708943	-0.750297	3.03478	2
TCONS_00038818	15	33756755	33764535	-	null		0.000842	0.0262453	5.20106	-0.171658	1.20409	-0.750297	3.04614	2
CUFF.16555.1	15	8071307	8076450	+	Wdr70	ENSMUSG00000039828	0.000618	0.0205943	5.25064	0.0233296	-0.883702	-0.750297	3.18884	2
TCONS_00011622	10	24773814	24836195	-	Enpp3	ENSMUSG00000019989	0.000289	0.0115191	5.45624	-0.555659	0.41262	-0.750297	3.29207	2
CUFF.1425.1	1	77497152	77498307	+	Epha4	ENSMUSG00000026235	6.6e-08	1.16e-05	5.46138	0.407331	2.09892	-0.366296	4.81959	2
TCONS_00039310	15	64588680	64591189	-	null		0.000213	0.00905395	5.523	-0.504991	0.853263	-0.750297	3.36807	2
TCONS_00035685	14	79766772	79771312	-	Pcdh8	ENSMUSG00000036422	0.00145758	0.0398534	5.56326	-0.555659	-0.883702	-0.800964	2.49959	2
TCONS_00034233	14	20659033	20662583	-	Synpo2l	ENSMUSG00000039376	0.00139572	0.0386708	5.56643	-0.555659	-0.883702	-0.800964	2.53478	2
TCONS_00095622	7	130325868	130330764	-	Fgfr2	ENSMUSG00000030849	0.00136622	0.0380633	5.56958	-0.555659	-0.449034	-0.800964	2.54614	2	FGF2 and other fibroblast growth factors promote oocyte maturation (e.g. Du et al. 2021)
TCONS_00025151	12	82495419	82496537	-	AC156643.1	ENSMUSG00000094374	0.00136647	0.0380633	5.57272	-0.555659	-0.833035	-0.800964	2.53478	2
TCONS_00082398	5	114254164	114273807	-	Foxn4	ENSMUSG00000042002	0.000124	0.00586781	5.6438	0.0739973	-0.833035	-0.750297	3.50557	2	Transcription factor essential for neural and some non-neural tissues development; nothing known for oocytes
TCONS_00059490	2	11241891	11244064	-	Prkcq	ENSMUSG00000026778	0.00103682	0.0309114	5.6496	-0.171658	0.796621	-0.800964	2.56834	2	Mediates FSH-induced maturation of mouse cumulus-oocyte complexes (doi: 10.1371/journal.pone.0111423)
TCONS_00077714	5	73946938	73949303	+	null		0.00104275	0.0309316	5.66743	-0.555659	0.463288	-0.800964	2.49959	2
TCONS_00065025	3	94265687	94266784	+	Gm4778	ENSMUSG00000089696	0.000909	0.0278677	5.72531	-0.555659	-0.883702	-0.800964	2.44982	2
TCONS_00096109	8	9081814	9083373	+	null		0.000701	0.022905	5.73389	0.457998	-0.203379	-0.800964	2.67954	2
TCONS_00106866	9	93391167	93392227	-	null		0.00066	0.0217123	5.7395	-0.555659	0.601634	-0.800964	2.71607	2
TCONS_00016275	11	82030659	82037454	+	Gm17268	ENSMUSG00000092157	2.06e-06	0.000213	5.74014	-0.171658	0.927394	-0.416963	4.51886	2
TCONS_00003680	1	183073302	183078650	+	null		0.00066	0.0217123	5.7423	-0.555659	-0.782367	-0.800964	2.70711	2
TCONS_00093333	7	25802475	25816913	-	Cyp2s1	ENSMUSG00000040703	0.000703	0.0229252	5.7479	-0.504991	0.274275	-0.800964	2.63111	2
TCONS_00049165	17	92964869	92996214	-	null		0.000399	0.0147913	5.88135	-0.555659	0.129955	-0.800964	2.7423	2
TCONS_00016145	11	77930917	77964153	+	Sez6	ENSMUSG00000000632	3.35e-05	0.00207931	5.89127	-0.555659	-0.883702	-0.750297	3.82726	2
TCONS_00072087	4	144323456	144334521	+	Gm13128	ENSMUSG00000078508	0.000256	0.0103746	5.9703	-0.555659	0.0792871	-0.800964	2.8535	2
TCONS_00067086	3	49596845	49598566	-	null		0.00017	0.00753849	6.02901	-0.555659	0.463288	-0.800964	3.00557	2
TCONS_00104561	9	115909455	116041216	+	Gadl1	ENSMUSG00000056880	3.7e-07	5.03e-05	6.03465	-0.171658	1.32494	-0.416963	4.76761	2
TCONS_00056860	2	74762980	74765143	+	Hoxd1	ENSMUSG00000042448	0.000123	0.00585999	6.09423	-0.555659	-0.833035	-0.800964	3.06834	2	Transcription factor in embryo (anterior-posterior axis; Zakany et al. 2001)
TCONS_00033718	14	110970602	110972320	+	null		0.000116	0.0055845	6.14395	-0.555659	-0.782367	-0.800964	2.99355	2
TCONS_00002992	1	150100003	150108202	+	Ptgs2	ENSMUSG00000032487	8.14e-06	0.000656	6.16396	-0.171658	-0.008391	-0.750297	4.09779	2	Required for maternal-embryo communication; important for oocyte maturation, fertilization, implantation (Anamthathmakula and Winuthayanon 2021)
TCONS_00094228	7	62576686	62578188	-	null		4.91e-05	0.00284367	6.27195	-0.555659	-0.254046	-0.800964	3.2423	2
TCONS_00065898	3	137623585	137628333	+	Ddit4l	ENSMUSG00000046818	4.77e-05	0.00278193	6.36227	-0.555659	0.0792871	-0.800964	3.06834	2	Negative regulator of MTOR, needs to be supressed to promote COC development ( doi: 10.1242/jcs.182642)
TCONS_00040514	15	101996711	102004374	-	Krt8	ENSMUSG00000049382	2.87e-05	0.00185535	6.37334	0.212343	-0.833035	-0.800964	3.33862	2
TCONS_00111709	X	53069996	53114530	-	Plac1	ENSMUSG00000061082	2.09e-05	0.00144043	6.43016	-0.171658	-0.0590587	-0.800964	3.39636	2	oocyte meiois gene ( Shi et al. 2018)
TCONS_00003444	1	173013535	173014476	+	null		7.28e-06	0.000596	6.61169	-0.555659	-0.166368	-0.800964	3.58455	2
TCONS_00059614	2	16287526	16313534	-	null		7.91e-06	0.000642	6.62084	-0.504991	0.658276	-0.800964	3.53478	2
TCONS_00007553	1	175059096	175492685	-	Rgs7	ENSMUSG00000026527	3.32e-07	4.63e-05	6.73707	0.263011	0.934967	-0.750297	4.67543	2
TCONS_00074427	4	101834969	101844023	-	B020004J07Rik	ENSMUSG00000035201	3.63e-06	0.000336	6.7451	-0.555659	-0.1157	-0.800964	3.67954	2
TCONS_00017109	11	111023860	111027965	+	Kcnj16	ENSMUSG00000051497	3.63e-06	0.000336	6.7451	-0.555659	1.39907	-0.800964	3.67954	2
TCONS_00110012	X	126551734	126552743	+	null		2.09e-06	0.000214	6.81751	-0.555659	-0.166368	-0.800964	3.79407	2
TCONS_00010960	10	127801154	127815839	+	Rdh16	ENSMUSG00000069456	7.19e-07	9e-05	6.99993	-0.171658	0.991609	-0.800964	3.95303	2
TCONS_00105853	9	44803355	44881274	-	Mll1	ENSMUSG00000002028	1.01e-07	1.67e-05	7.29418	-0.504991	-0.833035	-0.800964	4.26137	2	H3K4 methyltransferase
TCONS_00091565	7	103416696	103419819	+	Usp17l5	ENSMUSG00000058976	8.6e-09	1.88e-06	7.69088	-0.555659	0.0792871	-0.800964	4.60041	2
TCONS_00059350	2	5896089	5942743	-	Gm13267	ENSMUSG00000085818	0.000123	0.00585999	1.50691	4.01232	4.8627	3.91597	5.50034	3
TCONS_00026238	13	15397500	15431551	+	null		5.97e-05	0.00331613	1.51271	3.84922	5.29682	4.05649	5.65087	3
TCONS_00029447	13	40501420	40518993	-	null		1.61e-05	0.0011691	1.61065	4.25275	5.33365	4.03929	5.71607	3
TCONS_00087793	6	85865422	85905073	-	Cml2	ENSMUSG00000033634	0.000105	0.00521797	1.64305	4.17373	4.99721	3.65733	5.44091	3
TCONS_00074244	4	90354429	90365081	-	null		1.14e-09	3.33e-07	1.66199	4.66451	6.12581	4.98681	6.75071	3
TCONS_00043770	16	57168863	57231604	-	Tbc1d23	ENSMUSG00000022749	2.23e-07	3.25e-05	1.662	5.31356	5.83214	4.58546	6.31572	3
TCONS_00069082	3	157894248	157925095	-	Cth	ENSMUSG00000028179	0.000111	0.00535475	1.75479	4.49224	5.34088	3.72071	5.43969	3
TCONS_00004414	1	23995939	24005656	-	1110058L19Rik	ENSMUSG00000026154	0.000189	0.00823188	1.80168	5.19122	5.57908	3.32	5.20315	3
TCONS_00051476	18	33199307	33213862	-	Stard4	ENSMUSG00000024378	1.52e-06	0.000165	1.81224	3.67859	4.96291	4.01013	5.86082	3
TCONS_00104119	9	102562604	102571647	+	null		0.00153544	0.0413295	1.82147	1.97277	3.72674	2.70998	4.54685	3
TCONS_00081986	5	102912347	103100081	-	Mapk10	ENSMUSG00000046709	0.000217	0.00916707	1.87315	3.12592	4.28726	2.99264	4.97202	3
TCONS_00039083	15	53973194	53978466	-	null		0.000148	0.00676081	1.90919	2.1988	4.308	3.22015	5.20513	3
TCONS_00073316	4	39636200	39644948	-	null		0.000694	0.0227048	1.94724	1.31965	3.70847	2.61149	4.6361	3
TCONS_00037392	15	77607063	77627172	+	AL592187.1	ENSMUSG00000095704	0.000711	0.0230984	1.94765	2.09363	3.87821	2.61258	4.77483	3
TCONS_00067087	3	50011825	50017614	-	null		0.000125	0.00593746	1.98776	3.38512	4.21614	2.86667	4.93271	3
TCONS_00112273	X	89403848	89409751	-	Pet2	ENSMUSG00000035395	1.04e-06	0.000121	1.99037	3.6084	5.84011	3.54837	5.6082	3
TCONS_00066473	3	11823006	11844402	-	null		0.000426	0.0155888	2.00048	3.64541	4.15467	2.61149	4.67129	3
TCONS_00050248	18	53082231	53096795	+	null		7.44e-07	9.1e-05	2.01419	3.18876	4.57322	3.52882	5.6226	3
TCONS_00055068	19	42785988	43388311	-	Hpse2	ENSMUSG00000074852	0.00181837	0.047002	2.02026	1.86546	3.72483	2.18166	4.32535	3
TCONS_00038483	15	10865674	10881530	-	null		9.55e-08	1.6e-05	2.02338	3.36674	5.4426	3.89142	6.02042	3
TCONS_00060638	2	60417378	60553308	-	Pla2r1	ENSMUSG00000054580	7.14e-05	0.00380172	2.03866	3.06045	4.07386	2.84832	4.95822	3
TCONS_00069552	4	21595686	21604701	+	null		0.00165049	0.0436906	2.05928	1.79133	3.22509	2.11744	4.27175	3
TCONS_00036166	15	5671298	5710019	+	null		0.000324	0.0125335	2.07578	2.71845	3.73294	2.48395	4.73258	3
TCONS_00089531	7	17074040	17133690	+	Psg16	ENSMUSG00000066760	3.19e-05	0.00199384	2.10162	3.11963	4.03027	2.90851	5.07378	3
TCONS_00112389	X	94771959	94774155	-	null		9.75e-05	0.00490653	2.12438	1.79133	3.99855	2.59197	4.864	3
TCONS_00042099	16	72563698	73046100	+	Robo1	ENSMUSG00000022883	5.45e-18	7.55e-15	2.12997	5.45257	6.79647	5.06294	7.30112	3	Robo 2 is also in cluster 3
TCONS_00043749	16	55811375	55822215	-	Nfkbiz	ENSMUSG00000035356	7.24e-22	2.15e-18	2.18096	5.40182	8.13798	5.4466	7.73817	3
TCONS_00088544	6	121502781	121514308	-	null		0.000106	0.00521797	2.18308	2.62195	4.53877	2.54603	5.07107	3
TCONS_00011642	10	25617254	25623066	-	null		0.000711	0.0230984	2.22812	1.56531	3.31991	1.87936	4.54614	3
TCONS_00050060	18	44327484	44359566	+	Myot	ENSMUSG00000024471	1.74e-06	0.000184	2.24289	3.43228	4.84346	3.00147	5.31427	3
TCONS_00006156	1	108373494	108379938	-	null		9.38e-05	0.00474449	2.25327	2.39378	3.80485	2.40768	4.75296	3
TCONS_00005696	1	82390041	82416074	-	Rhbdd1	ENSMUSG00000026142	1.04e-08	2.21e-06	2.28147	4.09853	4.94552	3.49278	5.88698	3
TCONS_00035708	14	82486039	82498102	-	snR78	ENSMUSG00000088757	0.000204	0.00880447	2.29161	2.98757	4.11372	2.22261	4.54685	3
TCONS_00062945	2	171914165	171933598	-	null		5.5e-07	7.1e-05	2.2926	3.16776	5.53343	3.08915	5.5117	3
TCONS_00110183	X	144427736	144477175	+	Trpc5	ENSMUSG00000041710	1.17e-05	0.000884	2.35389	2.70963	4.89868	2.54603	4.96614	3
TCONS_00091024	7	77111498	77128143	+	null		0.00173609	0.0454931	2.37112	0.986319	3.55919	1.40768	4.03764	3
TCONS_00007822	1	185538399	185557214	-	null		0.00181856	0.047002	2.37747	0.319653	3.22174	1.56566	3.95303	3
TCONS_00075718	4	143987375	144002214	-	Pramef17	ENSMUSG00000078509	4.7e-07	6.18e-05	2.38381	2.35194	4.52336	2.936	5.4323	3
TCONS_00033059	14	65266701	65321501	+	Fbxo16	ENSMUSG00000034532	1.44e-12	7.65e-10	2.39796	4.12592	5.58059	3.88866	6.34946	3
TCONS_00092023	7	122289309	122634402	+	Prkcb	ENSMUSG00000052889	9.12e-08	1.54e-05	2.41018	2.88026	4.90487	3.0818	5.67011	3	Protein Kinase C beta form. The alpha form is important for meiosis, fertilization and early embryo development (Quan et al. 2003)
CUFF.29093.1	3	39885180	39889121	+	null		2.95e-06	0.000286	2.41312	1.23197	4.52553	2.62016	5.14996	3
TCONS_00033035	14	64510931	64531513	+	null		6.46e-08	1.15e-05	2.43187	2.57522	4.2831	3.0325	5.63298	3
TCONS_00104666	9	120278988	120280316	+	null		0.000292	0.0115426	2.43262	2.03699	3.22969	1.56082	4.55733	3
TCONS_00021300	12	12865900	12907334	+	null		0.000291	0.0115348	2.44055	2.1443	3.36112	1.84832	4.41265	3
TCONS_00023858	12	15976160	15997744	-	null		8.32e-06	0.000668	2.44656	2.80613	4.49805	2.49661	4.98823	3
TCONS_00087847	6	87133851	87335775	-	Antxr1	ENSMUSG00000033420	1.44e-08	2.94e-06	2.48696	3.3163	5.37306	3.08712	5.63765	3
TCONS_00109320	X	74304998	74311862	+	Gdi1	ENSMUSG00000015291	1.98e-05	0.00137997	2.4945	3.30244	4.24657	2.22261	4.79357	3
TCONS_00091222	7	83631934	83642318	+	Stard5	ENSMUSG00000046027	1.1e-05	0.000836	2.51083	3.06259	3.87139	2.26933	4.8405	3
TCONS_00074826	4	118471191	118490061	-	Tie1	ENSMUSG00000033191	5.86e-08	1.07e-05	2.56209	3.25829	4.68782	2.87179	5.54332	3
TCONS_00100164	8	44753500	44785051	-	null		0.000939	0.028647	2.58339	0.161675	2.95655	1.32	3.95303	3
TCONS_00074119	4	85218544	85225599	-	Sh3gl2	ENSMUSG00000028488	5.61e-07	7.19e-05	2.59311	1.34312	4.16404	2.51499	5.17188	3
TCONS_00054736	19	26869750	26882808	-	null		6.27e-05	0.00344425	2.61334	2.62195	3.42238	1.74101	4.63111	3
TCONS_00033090	14	66297031	66311424	+	1700001G11Rik	ENSMUSG00000085984	2.13e-08	4.26e-06	2.62614	2.82225	4.54058	2.80648	5.49108	3
TCONS_00088733	6	129267324	129275552	-	Cd69	ENSMUSG00000030156	0.000108	0.00526425	2.65451	3.36045	4.34231	1.54603	4.47669	3
TCONS_00006521	1	132564689	132741797	-	Nfasc	ENSMUSG00000026442	5.36e-13	3.01e-10	2.67365	3.04776	4.84532	3.46134	6.33403	3
TCONS_00067577	3	82643792	82649711	-	null		1.33e-05	0.000983	2.67656	2.00595	3.82522	1.99658	4.71272	3
TCONS_00001458	1	74854990	74857732	+	Gm16582	ENSMUSG00000089964	4.48e-13	2.59e-10	2.67883	3.3873	5.60048	3.68425	6.52723	3
TCONS_00072179	4	146156597	146198844	+	Zfp600	ENSMUSG00000066007	3.05e-05	0.00192412	2.69528	1.53213	3.42144	1.79168	4.58455	3	KRAB Zinc finger protein
TCONS_00043976	16	73920214	73982048	-	Robo2	ENSMUSG00000052516	0.00189805	0.0486933	2.70669	2.31965	2.76559	0.741014	3.77175	3	Robo 1 also in cluster 3
TCONS_00037306	15	75969123	75975749	+	Zfp707	ENSMUSG00000034429	1.53e-07	2.34e-05	2.7163	3.37629	4.76605	2.61149	5.56182	3	KRAB Zinc finger protein
TCONS_00024480	12	44205600	44210143	-	Dnajb9	ENSMUSG00000014905	3.51e-07	4.83e-05	2.72925	3.04296	4.02713	2.32992	5.12828	3
TCONS_00012072	10	44548294	44592403	-	null		0.000777	0.024606	2.73691	0.263011	2.66573	1.07435	4.1082	3
TCONS_00019092	11	64440902	64458677	-	Hs3st3a1	ENSMUSG00000047759	4.6e-06	0.000411	2.7403	0.652986	4.31713	2.04862	4.99733	3
TCONS_00004799	1	40994686	41014387	-	null		0.00193946	0.0495872	2.77891	0.703654	3.29391	0.828692	3.80004	3
TCONS_00090288	7	36571325	36574161	+	null		2.98e-10	1.08e-07	2.78919	2.11709	5.12417	2.91553	5.89571	3
TCONS_00052554	19	3170005	3184351	+	null		0.00164854	0.0436906	2.79098	0.407331	2.59406	0.848323	3.82152	3
TCONS_00006142	1	107020137	107067581	-	Serpinb3a	ENSMUSG00000044594	2.59e-09	6.82e-07	2.8349	1.9221	4.28242	2.63496	5.53746	3
TCONS_00066423	3	10062859	10074034	-	null		0.000525	0.0182106	2.86722	0.986319	2.79787	0.791681	3.97202	3
TCONS_00049039	17	83146636	83154833	-	null		0.000121	0.00580393	2.91403	2.42696	3.6507	1.07435	4.32726	3
TCONS_00102908	9	48896348	48907770	+	Htr3a	ENSMUSG00000032269	0.000323	0.0125335	3.04707	1.89864	2.88242	0.764477	4.10041	3
TCONS_00106752	9	86133192	86137743	-	null		6.73e-08	1.17e-05	3.05102	1.65299	4.40091	1.98667	5.18884	3
TCONS_00023736	12	9489869	9495824	-	null		2.36e-06	0.000238	3.06303	1.79133	3.74612	1.48181	4.75349	3
CUFF.40519.1	7	11063384	11066431	-	null		6.46e-10	2.07e-07	3.12222	2.79133	4.90126	2.25579	5.55698	3
TCONS_00099565	8	23512385	23515336	-	null		3.15e-18	4.96e-15	3.16227	3.01861	4.96808	3.30949	6.55733	3
TCONS_00034503	14	33210356	33218606	-	Arhgap22	ENSMUSG00000063506	8.06e-28	5.58e-24	3.19215	3.56305	5.99023	3.87282	7.13228	3
TCONS_00005859	1	88522037	88523840	-	null		2.29e-07	3.3e-05	3.23343	0.740664	3.57359	1.60267	5.08655	3
TCONS_00050238	18	52965074	52980593	+	null		1.94e-05	0.00135664	3.26641	0.740664	3.65744	0.936001	4.46732	3
TCONS_00015713	11	67162843	67164138	+	null		0.00119776	0.0344575	3.26932	0.457998	2.77321	0.0177054	3.53764	3
TCONS_00043095	16	22381309	22441052	-	Etv5	ENSMUSG00000013089	1.87e-05	0.00132786	3.3266	-0.504991	3.17704	0.936001	4.31572	3	transcriptional regulator of the cyclooxygenase-2, which is important for oocyte maturation and ovulation (Eo et al. 2008)
TCONS_00027875	13	80883210	80896029	+	Arrdc3	ENSMUSG00000074794	0.000522	0.0181539	3.36871	1.89864	2.76223	0.357013	3.78603	3
TCONS_00091760	7	112167788	112172559	+	null		0.00136359	0.0380633	3.42053	1.23197	2.63123	0.162025	3.49355	3
TCONS_00081585	5	87124956	87424203	-	Ugt2b5	ENSMUSG00000054630	7.44e-07	9.1e-05	3.42782	1.458	4.53708	0.986669	4.76137	3
TCONS_00026556	13	27345668	27354216	+	Prl8a2	ENSMUSG00000018259	1.15e-07	1.85e-05	3.4857	2.06045	3.64687	0.986669	5.05733	3
TCONS_00000432	1	26117726	26125015	+	null		1.74e-08	3.5e-06	3.52706	0.935651	3.34457	1.28682	5.19575	3
TCONS_00106720	9	83109948	83146685	-	Hmgn3	ENSMUSG00000066456	3.88e-09	9.72e-07	3.54083	2.53427	3.9345	1.28682	5.46338	3
TCONS_00003329	1	167689239	167848741	+	Lmx1a	ENSMUSG00000026686	9.09e-06	0.000714	3.57465	0.87901	3.86806	0.458348	4.44009	3	TF in embryo development (mainly brain/domamin neurons) doi: 10.1523/JNEUROSCI.1077-11.2011.
TCONS_00052191	18	69755634	69779732	-	Y_RNA	ENSMUSG00000064706	3.44e-20	7.94e-17	3.58327	2.49649	4.75418	2.81729	6.48248	3
TCONS_00000163	1	12331495	12342763	+	null		1.25e-06	0.00014	3.59094	0.929678	3.53836	0.828692	4.81281	3
TCONS_00112793	X	122774979	122780321	-	null		1.37e-05	0.00101243	3.62443	1.37032	3.65356	0.546026	4.27381	3
TCONS_00002306	1	107686979	107693514	+	Gm15389	ENSMUSG00000086161	6.26e-10	2.03e-07	3.69332	2.50109	4.07443	1.56566	5.28704	3
TCONS_00029730	13	49898032	49924423	-	AC091683.1	ENSMUSG00000093976	4.04e-07	5.42e-05	3.71862	-0.12099	4.08261	0.764477	4.83107	3
TCONS_00052216	18	71256940	71299431	-	Dcc	ENSMUSG00000060534	5.13e-05	0.00294309	3.76529	-0.171658	2.51658	0.300371	4.07378	3
TCONS_00003801	1	186967416	186970902	+	D1Pas1	ENSMUSG00000039224	0.00046	0.0165266	3.78555	0.847973	3.78522	-0.315628	3.58455	3
TCONS_00031204	13	107297546	107329712	-	null		0.000245	0.0100621	3.80677	0.161676	3.13339	0.0236795	3.93682	3
TCONS_00041800	16	44716131	44720880	+	null		0.00048	0.017024	3.84026	-0.12099	2.1866	-0.171308	3.63111	3
TCONS_00068839	3	139795212	139808370	-	null		0.00181104	0.0469244	3.84732	-0.504991	1.83972	-0.366296	3.27586	3
TCONS_00036414	15	19103525	19107831	+	null		6.35e-05	0.00346596	3.86267	0.124665	2.61643	-0.12064	3.96889	3
TCONS_00066159	3	152052598	152058055	+	null		0.000399	0.0147913	3.93135	1.18131	1.73241	-0.171308	3.60041	3
TCONS_00000092	1	8258652	8268010	+	null		5.76e-07	7.35e-05	3.96797	1.79133	3.73241	0.546026	4.57986	3
TCONS_00006458	1	131128441	131151296	-	Dyrk3	ENSMUSG00000016526	0.00125429	0.0359012	4.02139	0.740664	2.3114	-0.366296	3.2423	3
TCONS_00085552	6	102219207	102243357	+	Cntn3	ENSMUSG00000030075	1.66e-06	0.000179	4.12478	1.70365	4.02049	0.300371	4.49355	3
TCONS_00020565	11	109450865	109473146	-	Amz2	ENSMUSG00000020610	2.65e-07	3.77e-05	4.15198	2.13946	3.47809	0.495359	4.68537	3
TCONS_00093073	7	17635299	17640629	-	null		2.98e-33	6.19e-29	4.25854	2.55313	5.87622	2.70998	7.17671	3
TCONS_00068904	3	144188530	144205588	-	Lmo4	ENSMUSG00000028266	1.04e-07	1.7e-05	4.31649	0.457998	2.55842	0.212693	4.73258	3	Lmo4 is involved in Sertoli cell differentiation.
TCONS_00066518	3	15296551	15332302	-	Gm9733	ENSMUSG00000078783	0.000222	0.00931919	4.32093	-0.504991	2.24126	-0.366296	3.67484	3
TCONS_00046019	17	48082366	48086849	+	null		1.32e-13	8.08e-11	4.33	0.740664	3.98404	1.14848	5.70922	3
TCONS_00041808	16	44943678	44981785	+	Cd200r3	ENSMUSG00000036172	0.0018391	0.047415	4.33865	0.212343	2.89406	-0.699629	3.13111	3
TCONS_00027422	13	61657048	61659471	+	null		0.000148	0.00676081	4.38219	-0.555659	2.49244	-0.366296	3.7423	3
TCONS_00113405	X	167241242	167287955	-	Tlr8	ENSMUSG00000040522	3.44e-09	8.82e-07	4.41459	1.70963	3.57929	0.236156	5.14598	3
TCONS_00061075	2	84721728	84727350	-	Clp1	ENSMUSG00000027079	6.9e-05	0.00372661	4.44618	0.457998	2.73241	-0.366296	3.89982	3
TCONS_00055849	2	22623304	22693874	+	Gad2	ENSMUSG00000026787	0.00131854	0.0371766	4.46305	-0.504991	1.51993	-0.699629	3.24658	3
TCONS_00084831	6	64859295	64861991	+	null		0.00156116	0.0417568	4.47647	-0.555659	2.67791	-0.699629	3.07378	3
TCONS_00018417	11	40494109	40586926	-	null		2.98e-06	0.000288	4.50799	-0.504991	2.99907	-0.315628	4.32726	3
TCONS_00100761	8	80764434	80880505	-	Gab1	ENSMUSG00000031714	7.51e-10	2.33e-07	4.58927	0.212343	4.25569	0.40768	5.18537	3	Intracellular signalling, FGRF1 signalling (function in oocyte?)
TCONS_00111511	X	40925535	40929602	-	null		1.78e-05	0.00127463	4.66539	0.814795	3.52739	-0.648961	4.06834	3
TCONS_00092846	7	11161269	11166414	-	Zscan4d	ENSMUSG00000090714	4.2e-19	7.72e-16	4.78774	1.03699	4.53708	1.07435	6.29806	3	Zygotic genome activation, late 2-cell stage (Falco et al. 2007)
TCONS_00067389	3	66443511	66470923	-	null		6.78e-06	0.000561	4.86294	-0.504991	2.46329	-0.366296	4.2194	3
TCONS_00093787	7	37472134	37743037	-	Zfp536	ENSMUSG00000043456	0.000264	0.010613	4.89227	-0.504991	3.52326	-0.416963	3.55733	3	KRAB zinc finger protein
TCONS_00071213	4	118722889	118729660	+	Olfr1340	ENSMUSG00000070821	9.09e-05	0.00465435	5.01384	0.652986	2.45572	-0.416963	3.82726	3
TCONS_00052215	18	70798282	70801345	-	null		0.00128319	0.0366273	5.06947	0.161676	1.90792	-0.750297	2.99959	3
TCONS_00070837	4	101907185	101945393	+	Gm12800	ENSMUSG00000037028	2.35e-07	3.37e-05	5.30068	0.263011	2.65828	-0.366296	4.66295	3
TCONS_00054970	19	39608842	39674020	-	Cyp2c67	ENSMUSG00000062624	0.000487	0.0171989	5.30822	-0.171658	1.50638	-0.750297	3.24658	3
TCONS_00021996	12	37073260	37075485	+	null		0.000159	0.00709915	5.56278	-0.555659	1.48292	-0.750297	3.49959	3
TCONS_00040620	16	3759033	3785796	+	null		0.00139572	0.0386708	5.56643	-0.555659	1.1866	-0.800964	2.53478	3
TCONS_00029732	13	49954670	49956413	-	null		0.000674	0.0220979	5.74509	-0.555659	1.1866	-0.800964	2.67954	3
TCONS_00010255	10	98113018	98116418	+	null		0.000482	0.0170505	5.81353	-0.555659	1.2683	-0.800964	2.77586	3
TCONS_00107065	9	101922128	102354693	-	Ephb1	ENSMUSG00000032537	6.25e-12	3.17e-09	5.81989	0.0233296	4.03384	-0.171308	5.60642	3
TCONS_00108938	X	52362542	52369219	+	Gpc3	ENSMUSG00000055653	3.71e-15	3.35e-12	5.88097	0.652986	4.37935	0.162025	6.01354	3
TCONS_00023008	12	89799351	89806138	+	Nrxn3	ENSMUSG00000066392	0.000349	0.0132248	5.88646	-0.504991	2.05707	-0.800964	2.83862	3
TCONS_00113086	X	149897574	149898419	-	null		0.000336	0.0128659	5.89654	0.0233297	2.85326	-0.800964	2.83862	3
TCONS_00068845	3	140686957	140760553	-	null		9.1e-06	0.000714	6.15651	-0.555659	3.3239	-0.750297	4.0601	3
TCONS_00094955	7	104767609	104784473	-	Dub3	ENSMUSG00000043073	7.1e-05	0.00379793	6.20839	-0.555659	1.37561	-0.800964	3.16055	3
TCONS_00024709	12	56091649	56098043	-	null		6.04e-06	0.000508	6.22096	-0.454323	3.23726	-0.750297	4.15814	3
TCONS_00111694	X	51968695	51972797	-	1700080O16Rik	ENSMUSG00000031118	4.41e-05	0.00263845	6.31602	0.161676	2.96057	-0.800964	3.21607	3
TCONS_00061049	2	83915079	83941226	-	Zswim2	ENSMUSG00000034552	2.88e-05	0.00185728	6.38232	-0.555659	1.37561	-0.800964	3.31959	3
TCONS_00092071	7	125908610	125925238	+	Gsg1l	ENSMUSG00000046182	2.47e-05	0.00164463	6.41971	-0.555659	1.45111	-0.800964	3.33107	3
TCONS_00087669	6	78375874	78379032	-	Reg3d	ENSMUSG00000068341	5.75e-06	0.000487	6.66148	0.0233296	1.91385	-0.800964	3.61078	3
TCONS_00022131	12	47542545	47545550	+	null		8.17e-10	2.5e-07	6.79759	-0.171658	4.20569	-0.699629	5.61207	3
TCONS_00079539	5	135974513	135975343	+	Srcrb4d	ENSMUSG00000029699	1.68e-07	2.53e-05	7.21243	-0.555659	2.52875	-0.800964	4.18884	3
TCONS_00077615	5	67043728	67057159	+	Limch1	ENSMUSG00000037736	8.69e-09	1.88e-06	7.33429	-0.171658	3.41387	-0.750297	5.27175	3
TCONS_00020214	11	99810623	99810910	-	null		1.86e-10	7.44e-08	8.18275	-0.555659	2.80408	-0.800964	5.15814	3
TCONS_00097923	8	94179089	94180325	+	Mt1	ENSMUSG00000031765	1.79e-14	1.28e-11	9.39779	-0.504991	5.79549	-0.800964	6.36953	3	Role in oocyte maturation and meiosis (Wang et al. 2021)

## Sheet: Ehmt2 cKO DEGs Log2FC>1.5
Probe	Chromosome	Start	End	Probe Strand	Overlapping Gene	ID	P-value	FDR	Log2FC	Ehmt2 Control	Ehmt2 cKO	Ehmt1/2 Control	Ehmt1/2 cDKO
TCONS_00001458	1	74854990	74857732	+	Gm16582	ENSMUSG00000089964	4.20228e-10	5.79718e-07	2.18111	3.3873	5.60048	3.68425	6.52723
TCONS_00006047	1	98817536	98823294	-	null		0.000389233	0.0433032	3.38513	0.0739973	3.39041	1.56566	3.83862
TCONS_00006142	1	107020137	107067581	-	Serpinb3a	ENSMUSG00000044594	4.42773e-05	0.0101803	2.28452	1.9221	4.28242	2.63496	5.53746
TCONS_00006246	1	118834132	119053619	-	Gli2	ENSMUSG00000048402	0.000179749	0.0259491	-1.79767	4.78479	2.70137	4.94824	4.00408
TCONS_00006521	1	132564689	132741797	-	Nfasc	ENSMUSG00000026442	0.000105916	0.0184477	1.70319	3.04776	4.84532	3.46134	6.33403
TCONS_00006618	1	135253474	135259242	-	Elf3	ENSMUSG00000003051	3.44216e-06	0.00136978	-1.86296	5.0585	3.12524	5.20668	5.78401
TCONS_00003329	1	167689239	167848741	+	Lmx1a	ENSMUSG00000026686	0.000326663	0.0388486	2.61039	0.87901	3.86806	0.458348	4.44009
TCONS_00003801	1	186967416	186970902	+	D1Pas1	ENSMUSG00000039224	0.000185492	0.0264716	2.80595	0.847973	3.78522	-0.315628	3.58455
TCONS_00062945	2	171914165	171933598	-	null		3.40878e-10	5.11342e-07	2.34663	3.16776	5.53343	3.08915	5.5117
CUFF.29093.1	3	39885180	39889121	+	null		2.06651e-07	0.000142541	3.1913	1.23197	4.52553	2.62016	5.14996
TCONS_00067858	3	91970132	91991183	-	null		0.000115584	0.0189824	2.59799	1.03699	3.94011	2.81514	4.44578
TCONS_00065512	3	108085976	108101432	+	Ampd2	ENSMUSG00000027889	0.000113913	0.0189824	-1.66019	4.69378	2.99907	3.82994	4.53977
TCONS_00068845	3	140686957	140760553	-	null		4.88277e-06	0.00174205	6.18768	-0.555659	3.3239	-0.750297	4.0601
TCONS_00074119	4	85218544	85225599	-	Sh3gl2	ENSMUSG00000028488	8.32533e-05	0.0156166	2.47709	1.34312	4.16404	2.51499	5.17188
TCONS_00075718	4	143987375	144002214	-	Pramef17	ENSMUSG00000078509	6.88416e-05	0.0139661	2.05023	2.35194	4.52336	2.936	5.4323
TCONS_00077615	5	67043728	67057159	+	Limch1	ENSMUSG00000037736	0.000137253	0.0216807	4.68518	-0.171658	3.41387	-0.750297	5.27175
TCONS_00081585	5	87124956	87424203	-	Ugt2b5	ENSMUSG00000054630	7.98407e-06	0.00254176	2.56962	1.458	4.53708	0.986669	4.76137
TCONS_00078449	5	104202617	104214102	+	Dmp1	ENSMUSG00000029307	0.000366338	0.041882	-5.48077	2.19013	-0.883702	2.18166	0.338624
TCONS_00079539	5	135974513	135975343	+	Srcrb4d	ENSMUSG00000029699	0.000245912	0.0324118	5.38201	-0.555659	2.52875	-0.800964	4.18884
TCONS_00086473	6	6041217	6174160	-	Slc25a13	ENSMUSG00000015112	5.64815e-05	0.0121747	-1.88867	4.4864	2.59406	4.69248	2.7423
TCONS_00084415	6	42032394	42035157	+	null		2.33555e-05	0.0061961	1.55004	3.58877	5.18051	4.39185	5.83308
TCONS_00084831	6	64859295	64861991	+	null		0.000123539	0.0199718	5.53689	-0.555659	2.67791	-0.699629	3.07378
TCONS_00087847	6	87133851	87335775	-	Antxr1	ENSMUSG00000033420	5.11413e-08	4.0653e-05	2.02154	3.3163	5.37306	3.08712	5.63765
TCONS_00085552	6	102219207	102243357	+	Cntn3	ENSMUSG00000030075	0.000154609	0.0240123	2.31378	1.70365	4.02049	0.300371	4.49355
TCONS_00088308	6	110566489	110571318	-	null		0.000259459	0.0331419	5.0087	-0.504991	3.09892	-0.416963	2.92359
TCONS_00088544	6	121502781	121514308	-	null		8.80582e-05	0.0161256	1.88942	2.62195	4.53877	2.54603	5.07107
CUFF.40519.1	7	11063384	11066431	-	null		5.33869e-06	0.00184123	1.99513	2.79133	4.90126	2.25579	5.55698
TCONS_00092846	7	11161269	11166414	-	Zscan4d	ENSMUSG00000090714	3.04133e-07	0.00019667	3.26908	1.03699	4.53708	1.07435	6.29806
TCONS_00093073	7	17635299	17640629	-	null		4.28666e-16	1.4784e-12	3.23385	2.55313	5.87622	2.70998	7.17671
TCONS_00089842	7	24610758	24629300	+	Phldb3	ENSMUSG00000074277	0.000353253	0.0410295	-2.12754	3.90684	1.83972	4.75466	2.70711
TCONS_00090288	7	36571325	36574161	+	null		2.41745e-09	2.77913e-06	2.83111	2.11709	5.12417	2.91553	5.89571
TCONS_00093787	7	37472134	37743037	-	Zfp536	ENSMUSG00000043456	3.11401e-05	0.00776365	5.56383	-0.504991	3.52326	-0.416963	3.55733
TCONS_00091085	7	80024814	80092751	+	Zfp710	ENSMUSG00000048897	6.2946e-05	0.013157	-1.88866	4.49743	2.59406	4.55484	3.81959
TCONS_00091795	7	113765998	114043370	+	Spon1	ENSMUSG00000038156	0.000108781	0.0184509	-1.79119	4.56128	2.73986	3.92095	3.08455
TCONS_00092023	7	122289309	122634402	+	Prkcb	ENSMUSG00000052889	5.20448e-06	0.00182536	1.94114	2.88026	4.90487	3.0818	5.67011
TCONS_00096113	8	9085639	9120255	+	null		3.8988e-05	0.00916793	1.57276	3.57128	5.22163	3.92331	5.42941
TCONS_00099565	8	23512385	23515336	-	null		3.03606e-05	0.00768703	1.88874	3.01861	4.96808	3.30949	6.55733
TCONS_00096800	8	33516621	33585582	+	Tex15	ENSMUSG00000009628	2.64735e-33	2.73908e-29	-2.57058	7.1019	4.54302	7.42209	4.57514
TCONS_00100154	8	43907321	43912195	-	null		0.000208813	0.0289998	1.94757	2.31965	4.28219	3.33698	6.03353
TCONS_00100761	8	80764434	80880505	-	Gab1	ENSMUSG00000031714	7.6526e-07	0.000414999	4.26912	0.212343	4.25569	0.40768	5.18537
TCONS_00097923	8	94179089	94180325	+	Mt1	ENSMUSG00000031765	2.54044e-10	4.38078e-07	7.66467	-0.504991	5.79549	-0.800964	6.36953
TCONS_00101953	8	127613029	127648983	-	null		0.000211815	0.0292206	2.8536	0.596344	3.68536	1.89899	3.46889
TCONS_00106752	9	86133192	86137743	-	null		1.49898e-05	0.00424909	2.50346	1.65299	4.40091	1.98667	5.18884
TCONS_00107065	9	101922128	102354693	-	Ephb1	ENSMUSG00000032537	5.90228e-06	0.00200223	4.44396	0.0233296	4.03384	-0.171308	5.60642
TCONS_00107738	9	122945089	122951261	-	1110059G10Rik	ENSMUSG00000032551	0.000180577	0.0259491	-1.51728	4.7934	3.28173	5.02067	4.1923
TCONS_00008488	10	22360552	22374139	+	Raet1c	ENSMUSG00000053219	0.000258772	0.0331419	-3.38743	3.25544	0.0792871	1.65334	0.631105
TCONS_00012046	10	43002501	43174530	-	Sobp	ENSMUSG00000038248	8.63012e-05	0.0159449	3.36496	0.124665	3.65994	0.300371	2.44982
TCONS_00009921	10	82985498	83195903	+	Chst11	ENSMUSG00000034612	2.59647e-07	0.000173318	-1.64978	5.56267	3.91873	5.86421	5.41265
TCONS_00018417	11	40494109	40586926	-	null		0.00037354	0.0422386	4.92138	-0.504991	2.99907	-0.315628	4.32726
TCONS_00019092	11	64440902	64458677	-	Hs3st3a1	ENSMUSG00000047759	1.2717e-06	0.000611981	3.47509	0.652986	4.31713	2.04862	4.99733
TCONS_00020214	11	99810623	99810910	-	null		6.25448e-05	0.013157	5.69611	-0.555659	2.80408	-0.800964	5.15814
TCONS_00023858	12	15976160	15997744	-	null		0.000305547	0.037635	1.68365	2.80613	4.49805	2.49661	4.98823
TCONS_00022131	12	47542545	47545550	+	null		4.239e-06	0.00155435	5.17109	-0.171658	4.20569	-0.699629	5.61207
TCONS_00029730	13	49898032	49924423	-	AC091683.1	ENSMUSG00000093976	3.85612e-06	0.00146265	4.48916	-0.12099	4.08261	0.764477	4.83107
TCONS_00027422	13	61657048	61659471	+	null		0.000179929	0.0259491	5.51412	-0.555659	2.49244	-0.366296	3.7423
TCONS_00030538	13	70142420	70152316	-	null		0.000282158	0.0356018	1.5754	3.05178	4.64248	3.58452	4.7645
TCONS_00030741	13	81671902	81711053	-	Polr3g	ENSMUSG00000035834	0.00019021	0.0267756	2.52069	1.26301	3.85068	1.55594	3.79407
TCONS_00034503	14	33210356	33218606	-	Arhgap22	ENSMUSG00000063506	7.46015e-14	2.20533e-10	2.39285	3.56305	5.99023	3.87282	7.13228
TCONS_00033090	14	66297031	66311424	+	1700001G11Rik	ENSMUSG00000085984	0.000256141	0.033127	1.67651	2.82225	4.54058	2.80648	5.49108
TCONS_00038483	15	10865674	10881530	-	null		2.63621e-08	2.37179e-05	2.00644	3.36674	5.4426	3.89142	6.02042
TCONS_00036613	15	33083129	33594552	+	Pgcp	ENSMUSG00000039007	0.000316353	0.0382824	5.35453	-0.555659	2.4187	0.902823	2.49959
TCONS_00039083	15	53973194	53978466	-	null		0.000117106	0.0190809	2.05996	2.1988	4.308	3.22015	5.20513
TCONS_00039746	15	80452240	80565138	-	Enthd1	ENSMUSG00000050439	0.000109704	0.0184562	5.59667	-0.555659	2.65828	-0.800964	2.04614
TCONS_00040932	16	9866481	9881296	+	Grin2a	ENSMUSG00000059003	8.89517e-06	0.00270688	1.62484	3.55773	5.20748	4.4931	5.94639
TCONS_00043095	16	22381309	22441052	-	Etv5	ENSMUSG00000013089	0.000134026	0.0213339	5.23056	-0.504991	3.17704	0.936001	4.31572
CUFF.19128.1	16	31673450	31675483	-	Dlg1	ENSMUSG00000022770	1.12372e-07	8.01836e-05	-1.68714	5.57456	3.92793	5.46775	5.96279
TCONS_00043468	16	38248121	38251096	-	Nr1i2	ENSMUSG00000022809	0.000445104	0.0489923	1.95636	2.1988	4.16446	1.14848	3.75507
TCONS_00043749	16	55811375	55822215	-	Nfkbiz	ENSMUSG00000035356	0	0	2.71508	5.40182	8.13798	5.4466	7.73817
TCONS_00047501	17	25565888	25570729	-	Sox8	ENSMUSG00000024176	6.04595e-05	0.0128978	-1.94897	4.39952	2.43624	4.11958	1.04614
TCONS_00046019	17	48082366	48086849	+	null		6.73189e-05	0.0137924	2.93238	0.740664	3.98404	1.14848	5.70922
TCONS_00050016	18	41362939	41369850	+	null		3.18725e-08	2.74808e-05	1.91578	3.70139	5.7122	3.8845	5.45283
TCONS_00052191	18	69755634	69779732	-	Y_RNA	ENSMUSG00000064706	0.00013167	0.0211214	1.83725	2.49649	4.75418	2.81729	6.48248
TCONS_00053474	19	40612397	40741602	+	Entpd1	ENSMUSG00000048120	1.02875e-05	0.00304114	-1.84974	4.8735	2.95339	4.86312	4.87257
TCONS_00108938	X	52362542	52369219	+	Gpc3	ENSMUSG00000055653	3.66716e-07	0.00022319	3.5523	0.652986	4.37935	0.162025	6.01354
TCONS_00112273	X	89403848	89409751	-	Pet2	ENSMUSG00000035395	4.97774e-11	1.03004e-07	2.23143	3.6084	5.84011	3.54837	5.6082
TCONS_00113048	X	144381225	144428272	-	Trpc5	ENSMUSG00000041710	0.000216646	0.0296212	1.60903	2.97363	4.97618	2.61258	4.47513
TCONS_00110183	X	144427736	144477175	+	Trpc5	ENSMUSG00000041710	1.02452e-06	0.000517085	2.19844	2.70963	4.89868	2.54603	4.96614
TCONS_00110226	X	150826972	150857089	+	null		0.00011507	0.0189824	5.58655	-0.555659	2.63824	-0.800964	1.83862
TCONS_00113400	X	167061242	167070389	-	Gm8817	ENSMUSG00000086008	7.82146e-07	0.000414999	1.91889	3.20094	5.14186	3.40893	4.99733

## Sheet: References
References oocyte function
Anamthathmakula P, Winuthayanon W. 2021. Prostaglandin-Endoperoxide Synthase 2 (PTGS2) in the Oviduct: Roles in Fertilization and Early Embryo Development. Endocrinology 162.
Baumann C, Viveiros MM, De La Fuente R. 2010. Loss of maternal ATRX results in centromere instability and aneuploidy in the mammalian oocyte and pre-implantation embryo. PLoS Genet 6: e1001137.
Chen Q, Zhang W, Ran H, Feng L, Yan H, Mu X, Han Y, Liu W, Xia G, Wang C. 2014. PKCdelta and theta possibly mediate FSH-induced mouse oocyte maturation via NOX-ROS-TACE cascade signaling pathway. PLoS One 9: e111423.
Du C, Davis JS, Chen C, Li Z, Cao Y, Sun H, Shao BS, Lin YX, Wang YS, Yang LG et al. 2021. FGF2/FGFR signaling promotes cumulus-oocyte complex maturation in vitro. Reproduction 161: 205-214.
Eo J, Han K, K MM, Song H, Lim HJ. 2008. Etv5, an ETS transcription factor, is expressed in granulosa and cumulus cells and serves as a transcriptional regulator of the cyclooxygenase-2. J Endocrinol 198: 281-290.
Falco G, Lee SL, Stanghellini I, Bassey UC, Hamatani T, Ko MS. 2007. Zscan4: a novel gene expressed exclusively in late 2-cell embryos and embryonic stem cells. Dev Biol 307: 539-550.
Guo J, Shi L, Gong X, Jiang M, Yin Y, Zhang X, Yin H, Li H, Emori C, Sugiura K et al. 2016. Oocyte-dependent activation of MTOR in cumulus cells controls the development and survival of cumulus-oocyte complexes. J Cell Sci 129: 3091-3103.
Niwa H, Ogawa K, Shimosato D, Adachi K. 2009. A parallel circuit of LIF signalling pathways maintains pluripotency of mouse ES cells. Nature 460: 118-122.
Quan HM, Fan HY, Meng XQ, Huo LJ, Chen DY, Schatten H, Yang PM, Sun QY. 2003. Effects of PKC activation on the meiotic maturation, fertilization and early embryonic development of mouse oocytes. Zygote 11: 329-337.
Shi LY, Ma Y, Zhu GY, Liu JW, Zhou CX, Chen LJ, Wang Y, Li RC, Yang ZX, Zhang D. 2018. Placenta-specific 1 regulates oocyte meiosis and fertilization through furin. FASEB J 32: 5483-5494.
Wang B, Pfeiffer MJ, Drexler HC, Fuellen G, Boiani M. 2016. Proteomic Analysis of Mouse Oocytes Identifies PRMT7 as a Reprogramming Factor that Replaces SOX2 in the Induction of Pluripotent Stem Cells. J Proteome Res 15: 2407-2421.
Wang J, Zhuo Z, Ma X, Liu Y, Xu J, He C, Fu Y, Wang F, Ji P, Zhang L et al. 2021. Melatonin Alleviates the Suppressive Effect of Hypoxanthine on Oocyte Nuclear Maturation and Restores Meiosis via the Melatonin Receptor 1 (MT1)-Mediated Pathway. Front Cell Dev Biol 9: 648148.
Yan CH, Levesque M, Claxton S, Johnson RL, Ang SL. 2011. Lmx1a and lmx1b function cooperatively to regulate proliferation, specification, and differentiation of midbrain dopaminergic progenitors. J Neurosci 31: 12413-12425.
Yang F, Eckardt S, Leu NA, McLaughlin KJ, Wang PJ. 2008. Mouse TEX15 is essential for DNA double-strand break repair and chromosomal synapsis during male meiosis. The Journal of cell biology 180: 673-679.
Zakany J, Kmita M, Alarcon P, de la Pompa JL, Duboule D. 2001. Localized and transient transcription of Hox genes suggests a link between patterning and the segmentation clock. Cell 106: 207-217.

## Sheet: README
Supplemental Table S3: RNA-seq analysis
RPKM all oocyte transcripts	Average Log2 RPKM values of three biological replicates for all oocyte transcripts for all analysed genotypes
cDKO DEGs Log2FC>1.5 Clusters	Differentially expressed genes with a Log2 fold change of >1.5 between Ehmt1/2 cDKO oocytes and controls. Indicated is probe name (oocyte transcript), genome location, closest overlapping gene, p-value, FDR, log2FC, the cluster from Fig. 3E, average Log2 RPKM values of three biological replicates for each genotype and the oocyte function.
Ehmt2 cKO DEGs Log2FC>1.5	Differentially expressed genes with a Log2 fold change of >1.5 between Ehmt2 cKO oocytes and controls. Indicated is probe name (oocyte transcript), genome location, closest overlapping gene, p-value, FDR, log2FC, the cluster from Fig. 3E, average Log2 RPKM values of three biological replicates for each genotype and the oocyte function.
References	References as listed in "cDKO DEGs Log2FC>1.5 Clusters" in column P (Oocyte function)
