# Supplementary material for: Multi-omics analyses demonstrate a critical role for EHMT1 methyltransferase in transcriptional repression during oogenesis
Source: Genome Res. 2023 Jan;33(1):18–31. doi: 10.1101/gr.277046.122 (PMC9977154; doi:10.1101/gr.277046.122)
Supplement: Supplemental Material [file supp_gr.277046.122_Supplemental_Table_S4.xlsx]

## Sheet: Ehmt2 cKO hyper DMRs
Probe	Chromosome	Start	End	Difference (Ehmt2 cKO-Ehmt2 Control )	Ehmt2 Control	Ehmt2 cKO	Ehmt1/2 Control	Ehmt1/2 cDKO
Chr1:12437120-12455114	1	12437120	12455114	46.8226	28.6991	75.5217	18.1386	76.9148
Chr1:12551051-12566105	1	12551051	12566105	40.8994	25.6269	66.5263	9.46597	49.2456
Chr1:12566263-12583059	1	12566263	12583059	38.9169	30.6429	69.5597	11.0246	60.1466
Chr1:12583070-12592308	1	12583070	12592308	34.9073	53.1747	88.0819	44.8653	82.9914
Chr1:24452104-24460435	1	24452104	24460435	42.289	8.91486	51.2038	13.4791	59.9143
Chr1:30085641-30090642	1	30085641	30090642	30.9486	62.8934	93.8419	45.36	87.9828
Chr1:35580083-35596593	1	35580083	35596593	27.7409	22.978	50.7189	6.4766	78.6007
Chr1:40029440-40039117	1	40029440	40039117	39.4211	40.811	80.2322	40.1531	78.299
Chr1:40052441-40060683	1	40052441	40060683	32.0484	54.9483	86.9967	45.1389	73.4619
Chr1:40992635-41002498	1	40992635	41002498	37.2396	23.6335	60.8731	26.5368	43.0402
Chr1:54143666-54161026	1	54143666	54161026	50.2125	20.1094	70.3219	12.1031	50.51
Chr1:88471166-88480176	1	88471166	88480176	52.5788	24.2443	76.8231	32.5426	69.1182
Chr1:90648212-90657093	1	90648212	90657093	14.1541	78.0143	92.1684	64.2439	86.9283
Chr1:120445030-120457835	1	120445030	120457835	44.7737	31.3907	76.1643	19.2576	30.1705
Chr1:120529161-120541930	1	120529161	120541930	31.2673	34.6099	65.8772	31.3267	50.3422
Chr1:120940427-120960394	1	120940427	120960394	39.8403	21.5138	61.3541	12.8766	72.7478
Chr1:120970235-120982212	1	120970235	120982212	46.4061	32.0641	78.4703	8.62229	78.8981
Chr1:134004065-134010644	1	134004065	134010644	16.6354	74.3718	91.0072	70.9136	85.0435
Chr1:134010669-134022057	1	134010669	134022057	31.3585	45.1697	76.5281	23.5611	73.5963
Chr1:141666668-141685094	1	141666668	141685094	34.6712	52.5252	87.1964	36.9163	87.004
Chr1:141685327-141703440	1	141685327	141703440	35.1884	50.6765	85.8649	41.4925	64.2109
Chr1:159627909-159641241	1	159627909	159641241	34.6544	22.1221	56.7765	8.50097	71.8171
Chr1:166904000-166912735	1	166904000	166912735	28.8953	37.4659	66.3612	23.2843	48.5996
Chr1:167519077-167531509	1	167519077	167531509	29.3884	53.3568	82.7452	43.3514	65.8459
Chr1:182824799-182833479	1	182824799	182833479	32.9156	27.5302	60.4457	18.5595	52.7829
Chr1:184584457-184595134	1	184584457	184595134	24.8228	23.3674	48.1902	21.144	47.8476
Chr2:10169806-10177764	2	10169806	10177764	36.7842	46.3015	83.0857	42.1488	83.8512
Chr2:59357245-59369764	2	59357245	59369764	50.0899	25.1504	75.2403	11.9204	52.9942
Chr2:83166004-83186539	2	83166004	83186539	45.981	22.8982	68.8791	15.0141	58.5317
Chr2:93606155-93614721	2	93606155	93614721	18.7355	74.2428	92.9783	57.586	88.1534
Chr2:93619750-93629157	2	93619750	93629157	34.4171	40.4582	74.8752	19.3882	68.7702
Chr2:122192741-122204088	2	122192741	122204088	33.3228	22.7323	56.0551	11.0038	57.4398
Chr2:128321433-128331024	2	128321433	128331024	36.4353	31.7261	68.1614	18.5278	74.8549
Chr2:147940975-147952931	2	147940975	147952931	35.2303	45.8479	81.0782	36.0232	39.2963
Chr2:149830541-149831961	2	149830541	149831961	40.7717	28.7865	69.5582	24.2311	64.3128
Chr2:150998538-151008180	2	150998538	151008180	35.6283	33.5968	69.225	16.7418	60.9813
Chr2:164300859-164312310	2	164300859	164312310	49.4005	39.8233	89.2238	14.18	86.9881
Chr2:164312313-164325428	2	164312313	164325428	47.545	40.5972	88.1422	14.4498	75.8913
Chr2:173294971-173301455	2	173294971	173301455	61.4141	18.5689	79.983	8.09159	74.7769
Chr2:173301530-173307645	2	173301530	173307645	25.3246	9.18764	34.5122	5.39071	13.6051
Chr2:173981236-173991580	2	173981236	173991580	42.3702	18.4744	60.8446	6.07616	52.6388
Chr2:173991630-174000526	2	173991630	174000526	38.9155	18.9033	57.8188	7.88573	56.6402
Chr2:174050799-174059540	2	174050799	174059540	35.3809	13.7733	49.1542	3.38639	39.1814
Chr2:174059616-174070881	2	174059616	174070881	27.2134	19.6633	46.8767	6.3359	42.4495
Chr2:174618194-174626481	2	174618194	174626481	44.2688	22.5504	66.8192	16.4228	94.7641
Chr2:174626513-174636528	2	174626513	174636528	35.1897	28.7727	63.9624	12.7797	95.668
Chr2:174636635-174646104	2	174636635	174646104	38.226	25.1523	63.3783	7.94965	95.9014
Chr2:174646128-174657824	2	174646128	174657824	48.4635	16.9119	65.3754	11.0108	89.8848
Chr2:174657835-174666676	2	174657835	174666676	31.405	16.4649	47.8699	10.2929	87.3085
Chr2:174666728-174673777	2	174666728	174673777	37.0888	12.0758	49.1646	6.90818	91.1335
Chr2:174680885-174689605	2	174680885	174689605	39.5183	24.4895	64.0078	9.5033	90.9807
Chr2:174689681-174701462	2	174689681	174701462	46.0181	24.8912	70.9093	10.3339	92.8232
Chr2:174701465-174707355	2	174701465	174707355	47.4893	27.8749	75.3642	25.2118	91.4975
Chr2:174786198-174802270	2	174786198	174802270	32.9387	25.4358	58.3745	8.05859	63.6207
Chr2:174802338-174815784	2	174802338	174815784	62.2615	17.2891	79.5506	7.44239	84.6468
Chr2:174815787-174826520	2	174815787	174826520	56.3014	16.8494	73.1509	4.26512	76.3013
Chr2:178470030-178478161	2	178470030	178478161	61.6097	16.4361	78.0458	8.85275	87.5979
Chr2:178478391-178490215	2	178478391	178490215	53.2746	13.8303	67.105	4.42507	76.7371
Chr3:34904393-34913018	3	34904393	34913018	58.4514	25.6397	84.0911	21.1544	76.5472
Chr3:34913080-34922492	3	34913080	34922492	37.9916	43.6456	81.6372	16.2108	75.7001
Chr3:34932469-34947385	3	34932469	34947385	40.8836	26.0268	66.9104	14.96	60.8046
Chr3:35041448-35053622	3	35041448	35053622	25.426	60.8077	86.2337	34.2597	95.5424
Chr3:49029579-49048230	3	49029579	49048230	49.5024	23.0233	72.5257	26.3717	87.7642
Chr3:49137873-49157947	3	49137873	49157947	30.3114	57.5977	87.9091	50.4976	95.553
Chr3:54572563-54581577	3	54572563	54581577	20.038	68.018	88.056	59.4374	80.549
Chr3:91908392-91934176	3	91908392	91934176	46.6898	29.224	75.9138	20.636	68.0539
Chr3:100360480-100376496	3	100360480	100376496	28.9661	54.3073	83.2733	46.0178	70.3297
Chr3:101119298-101130771	3	101119298	101130771	39.919	36.825	76.7439	15.6243	51.0426
Chr3:106919892-106930667	3	106919892	106930667	29.5628	57.5898	87.1526	35.6939	82.8766
Chr3:106931271-106959241	3	106931271	106959241	28.7299	62.8141	91.544	65.6257	95.2049
Chr3:115443081-115463664	3	115443081	115463664	36.2595	27.8861	64.1455	13.3047	63.1616
Chr3:126922435-126932136	3	126922435	126932136	33.5317	47.3231	80.8549	45.6592	89.1654
Chr3:126946078-126953805	3	126946078	126953805	51.0799	29	80.0799	27.8123	72.3925
Chr3:129560770-129569509	3	129560770	129569509	35.6813	42.9399	78.6212	30.8914	64.8991
Chr3:135382366-135393775	3	135382366	135393775	22.4204	67.3786	89.799	57.8848	76.6568
Chr3:140703063-140726424	3	140703063	140726424	34.156	48.6813	82.8373	33.3758	89.9526
Chr3:140726431-140741675	3	140726431	140741675	31.0656	35.0319	66.0975	26.8367	63.6079
Chr3:146541140-146555117	3	146541140	146555117	40.4418	15.5717	56.0135	5.165	42.3401
Chr3:148631979-148640631	3	148631979	148640631	44.0185	32.2633	76.2818	19.6519	83.7083
Chr3:148640903-148649778	3	148640903	148649778	53.3482	23.2337	76.5819	10.0345	94.2612
Chr3:148695270-148707817	3	148695270	148707817	46.8999	14.953	61.8529	5.98485	73.6066
Chr3:149415977-149425449	3	149415977	149425449	39.0916	31.7802	70.8718	14.1921	73.6545
Chr3:149488697-149502993	3	149488697	149502993	61.0955	16.5048	77.6002	8.73369	78.7806
Chr4:8472364-8485728	4	8472364	8485728	31.6345	46.0411	77.6756	30.7683	80.0642
Chr4:12595492-12606142	4	12595492	12606142	33.7709	27.7342	61.505	9.22749	73.7875
Chr4:12645008-12662827	4	12645008	12662827	34.2926	42.556	76.8487	36.2849	83.9693
Chr4:53311390-53318906	4	53311390	53318906	56.1027	22.7911	78.8938	15.9598	91.7893
Chr4:79940188-79963120	4	79940188	79963120	39.9046	43.4125	83.3171	46.6136	80.1688
Chr4:82043929-82059844	4	82043929	82059844	51.282	40.4057	91.6877	23.6418	93.7729
Chr4:85210196-85223897	4	85210196	85223897	32.7737	57.2517	90.0253	46.4454	93.1361
Chr4:125819417-125830753	4	125819417	125830753	32.9904	22.3702	55.3606	17.24	48.3321
Chr4:127846248-127859656	4	127846248	127859656	29.0943	30.561	59.6553	17.2912	49.7833
Chr4:153931758-153937577	4	153931758	153937577	29.2895	26.6247	55.9141	14.3797	17.7547
Chr5:4358748-4371479	5	4358748	4371479	38.9633	18.6408	57.6042	5.35545	56.3095
Chr5:22710496-22724832	5	22710496	22724832	27.7895	55.4455	83.235	41.2745	81.4146
Chr5:26341393-26356867	5	26341393	26356867	35.89	46.391	82.281	32.4022	87.3309
Chr5:26357040-26373615	5	26357040	26373615	45.5823	32.4747	78.057	32.4678	91.3051
Chr5:43596774-43613945	5	43596774	43613945	35.1785	52.7296	87.9081	34.4067	91.9536
Chr5:60674759-60695353	5	60674759	60695353	33.3109	31.6939	65.0049	23.0924	62.5985
Chr5:67038818-67046572	5	67038818	67046572	40.0373	16.7233	56.7606	9.37102	81.0401
Chr5:67046594-67055377	5	67046594	67055377	36.9411	20.3972	57.3383	8.33866	86.0884
Chr5:69336792-69341239	5	69336792	69341239	41.7008	22.9596	64.6604	33.1924	85.9038
Chr5:101142139-101156062	5	101142139	101156062	33.0542	41.3085	74.3627	23.5225	67.2081
Chr5:101156184-101167858	5	101156184	101167858	42.2679	27.6962	69.9641	20.9462	65.9197
Chr5:102993942-103001799	5	102993942	103001799	29.3208	61.3263	90.6471	45.3843	87.5258
Chr5:103001804-103011030	5	103001804	103011030	36.4831	46.2175	82.7006	27.1168	79.2088
Chr6:32665478-32679204	6	32665478	32679204	42.3343	44.7774	87.1117	23.7054	86.3314
Chr6:52486353-52495732	6	52486353	52495732	36.5028	31.0571	67.5599	23.3194	48.7538
Chr6:87207784-87219100	6	87207784	87219100	41.015	47.3209	88.3359	39.389	89.4652
Chr6:87219146-87229134	6	87219146	87229134	34.7386	17.7055	52.4441	15.8679	46.5112
Chr6:87239163-87248730	6	87239163	87248730	52.6819	30.292	82.9739	27.0037	85.0771
Chr6:87249025-87257143	6	87249025	87257143	47.4986	44.6214	92.12	28.9852	92.4525
Chr6:87257163-87268485	6	87257163	87268485	31.6553	16.3956	48.0508	9.95673	42.6425
Chr6:114032753-114041715	6	114032753	114041715	23.2834	9.34922	32.6327	5.68685	77.5671
Chr6:114231313-114242020	6	114231313	114242020	57.41	23.3188	80.7288	6.77449	90.6694
Chr6:114242023-114250087	6	114242023	114250087	58.369	15.004	73.373	8.30734	88.5352
Chr6:126124184-126133037	6	126124184	126133037	31.0909	55.8241	86.915	28.291	90.7666
Chr6:147660693-147674808	6	147660693	147674808	33.2664	14.3077	47.5741	3.64334	50.7307
Chr6:147688241-147699635	6	147688241	147699635	50.2428	23.4768	73.7196	6.92146	72.8035
Chr7:4701740-4706894	7	4701740	4706894	46.282	28.9411	75.2231	10.6096	66.2272
Chr7:4707026-4713103	7	4707026	4713103	54.4908	24.4875	78.9783	11.2418	83.394
Chr7:4713120-4720711	7	4713120	4720711	37.3003	20.5225	57.8228	7.75861	41.1574
Chr7:13170036-13174030	7	13170036	13174030	32.8466	44.3016	77.1483	20.2165	73.9786
Chr7:13174075-13179494	7	13174075	13179494	47.2421	31.8177	79.0598	28.7269	64.9914
Chr7:18548999-18571734	7	18548999	18571734	34.5451	22.7703	57.3154	15.3022	48.1165
Chr7:36754266-36764599	7	36754266	36764599	46.6604	24.8599	71.5203	3.67483	72.5294
Chr7:36764681-36770030	7	36764681	36770030	43.328	14.8022	58.1302	4.18161	61.9208
Chr7:36770117-36773605	7	36770117	36773605	40.5629	14.8493	55.4122	2.20366	51.4673
Chr7:36773653-36783432	7	36773653	36783432	52.6077	38.4654	91.073	15.3542	86.9965
Chr7:36783461-36791746	7	36783461	36791746	37.1813	37.864	75.0453	18.7374	81.6493
Chr7:37474313-37480280	7	37474313	37480280	44.7541	24.3954	69.1496	4.30522	62.8296
Chr7:37480353-37487605	7	37480353	37487605	60.5613	12.8299	73.3911	4.15359	68.7978
Chr7:37487689-37494187	7	37487689	37494187	50.4941	14.7834	65.2775	3.5454	48.3211
Chr7:37494281-37500058	7	37494281	37500058	41.0632	13.5758	54.639	6.66336	40.6887
Chr7:37500081-37507322	7	37500081	37507322	60.5677	12.9161	73.4838	6.43744	58.8161
Chr7:37507384-37515265	7	37507384	37515265	51.891	20.0897	71.9806	7.75332	72.8739
Chr7:37515464-37523885	7	37515464	37523885	36.8965	25.963	62.8595	2.53789	47.5511
Chr7:37523898-37532758	7	37523898	37532758	45.3644	25.5278	70.8922	15.7041	62.6279
Chr7:37532798-37543348	7	37532798	37543348	46.855	24.2019	71.057	10.9473	59.208
Chr7:37550764-37561353	7	37550764	37561353	45.2171	29.0309	74.248	14.7963	62.1755
Chr7:37561412-37567214	7	37561412	37567214	59.3539	12.8123	72.1661	5.02527	57.7757
Chr7:37567225-37570855	7	37567225	37570855	50.9144	19.799	70.7134	8.08075	66.6042
Chr7:37570979-37583099	7	37570979	37583099	45.7883	24.2744	70.0627	4.90626	62.3134
Chr7:37583452-37590526	7	37583452	37590526	57.7497	16.9892	74.7389	5.03167	69.6007
Chr7:37590527-37600165	7	37590527	37600165	61.3362	12.7009	74.0371	1.92461	61.1828
Chr7:37600228-37608941	7	37600228	37608941	47.3835	20.5472	67.9306	4.04956	55.9115
Chr7:37609046-37621024	7	37609046	37621024	58.2742	17.7672	76.0415	8.48032	60.4198
Chr7:37625882-37635888	7	37625882	37635888	46.0287	17.0364	63.065	6.58821	66.2464
Chr7:43078050-43092820	7	43078050	43092820	47.3955	20.8712	68.2667	9.67354	61.1028
Chr7:45674903-45680544	7	45674903	45680544	35.6783	31.748	67.4263	12.7079	26.0252
Chr7:64996092-65008210	7	64996092	65008210	37.0966	28.0158	65.1124	10.2912	61.5509
Chr7:65205715-65212653	7	65205715	65212653	32.1165	44.6443	76.7607	29.0791	84.0699
Chr7:71468218-71483950	7	71468218	71483950	35.8667	48.0706	83.9373	42.9138	78.6071
Chr7:84954236-84975617	7	84954236	84975617	35.5947	41.4299	77.0246	35.1149	81.3097
Chr7:89404416-89407740	7	89404416	89407740	14.7149	8.02062	22.7355	8.3132	57.4298
Chr7:96442497-96453874	7	96442497	96453874	33.538	35.599	69.137	17.7069	57.4865
Chr7:96453916-96466982	7	96453916	96466982	37.4173	21.7571	59.1744	10.1999	38.5322
Chr7:96477225-96492643	7	96477225	96492643	42.2269	27.5117	69.7386	17.7653	55.03
Chr7:96492659-96502514	7	96492659	96502514	41.4723	25.8653	67.3376	10.0389	38.5803
Chr7:96708040-96718690	7	96708040	96718690	33.6287	32.3751	66.0038	17.1406	48.3951
Chr7:96718709-96728764	7	96718709	96728764	34.4126	17.9522	52.3648	16.7452	48.1859
Chr7:96778740-96788581	7	96778740	96788581	28.531	37.2682	65.7992	14.5342	65.7119
Chr7:96788595-96797374	7	96788595	96797374	33.8794	21.479	55.3584	15.7551	36.1295
Chr7:96856800-96867247	7	96856800	96867247	32.5161	28.831	61.3471	11.9918	35.5155
Chr7:96867267-96873867	7	96867267	96873867	35.0471	31.5917	66.6387	15.0095	46.3884
Chr7:96873893-96882472	7	96873893	96882472	33.6563	24.6148	58.2712	7.0487	39.9363
Chr7:96889093-96895667	7	96889093	96895667	52.9877	19.0383	72.0259	16.5207	49.5721
Chr7:111782170-111791691	7	111782170	111791691	39.738	20.1132	59.8512	15.1049	42.2261
Chr7:122389796-122402046	7	122389796	122402046	45.3687	38.2472	83.6159	31.1186	89.4639
Chr7:122402171-122409410	7	122402171	122409410	49.6307	38.9607	88.5913	31.7692	93.8656
Chr7:122416304-122426913	7	122416304	122426913	33.992	37.9963	71.9883	25.5601	70.0922
Chr7:122436725-122445205	7	122436725	122445205	37.6011	43.5365	81.1376	26.4268	90.0245
Chr7:122464406-122471956	7	122464406	122471956	41.6199	31.7455	73.3654	18.8117	84.5354
Chr7:122481512-122488412	7	122481512	122488412	35.0186	43.8867	78.9053	33.9498	91.8598
Chr7:122495683-122505406	7	122495683	122505406	36.3871	46.1432	82.5303	27.8056	94.3355
Chr7:122523215-122531729	7	122523215	122531729	35.0649	44.4182	79.4831	39.0266	92.2087
Chr7:122543918-122553739	7	122543918	122553739	30.0261	54.9666	84.9927	32.5529	90.681
Chr7:122565059-122574615	7	122565059	122574615	35.6177	44.257	79.8748	31.2055	90.0878
Chr7:122592817-122600742	7	122592817	122600742	33.7597	48.9615	82.7212	30.803	91.3776
Chr7:122600760-122610368	7	122600760	122610368	33.2767	49.1122	82.3889	41.0433	90.3762
Chr7:122854629-122863344	7	122854629	122863344	44.5462	34.9639	79.5101	20.5087	95.5553
Chr7:124436447-124461594	7	124436447	124461594	39.4089	32.0953	71.5041	13.2505	93.1117
Chr7:137846735-137857444	7	137846735	137857444	42.0705	34.2638	76.3342	14.8724	72.7807
Chr7:140294673-140303898	7	140294673	140303898	37.8588	37.4828	75.3416	9.91154	75.5657
Chr7:140303978-140316604	7	140303978	140316604	30.5802	23.9805	54.5607	11.1549	51.7738
Chr8:4071201-4078644	8	4071201	4078644	37.4591	32.9939	70.453	38.0143	54.6838
Chr8:11249035-11257481	8	11249035	11257481	31.5883	53.6431	85.2314	36.1506	88.2201
Chr8:11257506-11267297	8	11257506	11267297	31.7385	55.2659	87.0044	41.2769	88.1485
Chr8:11267312-11274484	8	11267312	11274484	27.5314	45.5402	73.0716	27.1692	70.2461
Chr8:11329439-11337891	8	11329439	11337891	38.9568	10.2213	49.1781	5.99126	28.1723
Chr8:11337904-11346358	8	11337904	11346358	53.2561	31.6981	84.9542	22.1009	81.3343
Chr8:15914782-15924089	8	15914782	15924089	18.8001	72.696	91.4961	55.3047	92.6731
Chr8:16098741-16118131	8	16098741	16118131	27.8799	58.4698	86.3498	55.5768	77.233
Chr8:23333628-23344338	8	23333628	23344338	39.7782	32.0571	71.8353	32.1394	81.2037
Chr8:30175014-30199128	8	30175014	30199128	42.078	19.4784	61.5565	13.6575	34.8918
Chr8:30241867-30263481	8	30241867	30263481	45.2267	18.375	63.6017	4.40217	38.6923
Chr8:41439464-41447883	8	41439464	41447883	46.7044	21.7501	68.4545	2.81713	77.6296
Chr8:44752721-44763043	8	44752721	44763043	32.3558	46.2046	78.5604	34.4234	79.44
Chr8:65328280-65342376	8	65328280	65342376	37.42	37.6541	75.0741	28.2823	78.8462
Chr8:65342382-65359954	8	65342382	65359954	43.1259	40.7384	83.8643	31.4591	80.4644
Chr8:80760560-80769702	8	80760560	80769702	53.0727	18.473	71.5457	5.04725	66.0793
Chr8:80769732-80776787	8	80769732	80776787	64.6186	19.1646	83.7832	4.76969	81.7812
Chr8:80776842-80784989	8	80776842	80784989	49.0498	11.6473	60.6971	5.91279	65.3708
Chr8:80785007-80792605	8	80785007	80792605	74.1353	15.5026	89.6379	3.77853	87.3254
Chr8:80792634-80800194	8	80792634	80800194	51.6996	21.4376	73.1372	3.79519	72.6542
Chr8:80800197-80808345	8	80800197	80808345	61.8845	20.3047	82.1891	6.53101	90.2602
Chr8:80808394-80817985	8	80808394	80817985	39.041	12.5655	51.6066	3.57892	63.0681
Chr8:80818141-80825058	8	80818141	80825058	45.7606	10.1989	55.9595	1.99322	55.5009
Chr8:80825099-80833374	8	80825099	80833374	36.8683	7.60823	44.4766	1.58696	36.9108
Chr8:80833494-80843979	8	80833494	80843979	42.401	11.7401	54.1411	4.13658	52.2776
Chr8:80844118-80850280	8	80844118	80850280	55.8218	16.4292	72.251	2.48952	83.8835
Chr8:80850289-80857191	8	80850289	80857191	34.3834	19.0175	53.401	4.12863	48.237
Chr8:92981903-92997355	8	92981903	92997355	36.0209	17.4441	53.465	12.4742	63.8694
Chr8:112144911-112157118	8	112144911	112157118	25.3487	67.1098	92.4584	62.8714	93.2582
Chr8:112169524-112177303	8	112169524	112177303	51.5784	37.9067	89.4851	46.4265	82.9027
Chr8:112177374-112190903	8	112177374	112190903	30.7856	60.6328	91.4184	57.0687	93.6823
Chr8:112190947-112200703	8	112190947	112200703	37.8501	44.2905	82.1407	46.12	91.7396
Chr8:112466431-112476412	8	112466431	112476412	30.5278	14.86	45.3878	11.1835	38.5591
Chr8:126137713-126139391	8	126137713	126139391	24.0819	3.40873	27.4907	1.17504	31.7273
Chr9:23138794-23149518	9	23138794	23149518	49.8127	38.1486	87.9613	23.4511	90.2279
Chr9:24985340-25005523	9	24985340	25005523	32.2344	29.7748	62.0092	11.8729	37.8737
Chr9:33189613-33209087	9	33189613	33209087	33.2471	53.7712	87.0183	30.347	89.1
Chr9:46429688-46439940	9	46429688	46439940	40.2791	42.0443	82.3235	37.6189	82.5047
Chr9:53849551-53864815	9	53849551	53864815	27.4083	53.6169	81.0252	34.9315	80.8077
Chr9:68483442-68496578	9	68483442	68496578	18.4558	74.3122	92.768	76.8747	80.6102
Chr9:85467314-85478397	9	85467314	85478397	34.365	34.6432	69.0081	22.6107	45.186
Chr9:94831094-94839475	9	94831094	94839475	45.1924	29.6269	74.8193	14.0977	66.8232
Chr9:94885378-94905075	9	94885378	94905075	38.5335	52.1609	90.6944	53.3627	90.0027
Chr9:94932727-94944084	9	94932727	94944084	27.6266	64.3658	91.9924	54.7324	94.9389
Chr9:94959862-94976026	9	94959862	94976026	28.1696	62.4696	90.6392	55.5774	95.5542
Chr9:94976139-94992334	9	94976139	94992334	45.8095	37.7125	83.522	28.9403	85.9351
Chr9:94992465-95011189	9	94992465	95011189	37.941	50.6036	88.5446	44.3516	97.9929
Chr9:95011321-95021898	9	95011321	95021898	35.5481	53.9687	89.5168	39.4697	95.2807
Chr9:95053336-95070200	9	95053336	95070200	38.3163	34.3673	72.6836	19.9426	85.8286
Chr9:97763385-97774451	9	97763385	97774451	47.4582	28.1481	75.6063	17.0291	61.4324
Chr9:101422453-101428146	9	101422453	101428146	32.195	58.5638	90.7588	42.3142	84.0747
Chr9:101913187-101923333	9	101913187	101923333	29.1811	11.5713	40.7524	4.32474	39.2707
Chr9:101923479-101931848	9	101923479	101931848	56.1846	32.2089	88.3935	8.83416	94.3912
Chr9:101931938-101943442	9	101931938	101943442	61.39	23.9687	85.3587	17.8867	94.0877
Chr9:101943589-101954923	9	101943589	101954923	51.8173	26.1118	77.9291	10.4733	92.5306
Chr9:101954961-101966150	9	101954961	101966150	65.3698	22.1489	87.5187	18.5407	95.5031
Chr9:101966183-101974981	9	101966183	101974981	69.7915	18.9476	88.7391	9.94351	93.965
Chr9:101975011-101985127	9	101975011	101985127	43.5632	26.4542	70.0174	13.1192	92.6181
Chr9:101985163-101993871	9	101985163	101993871	55.2173	20.9086	76.126	4.29	88.8086
Chr9:101994136-102002071	9	101994136	102002071	56.5895	25.1512	81.7407	14.0733	93.3152
Chr9:102002172-102009828	9	102002172	102009828	52.7343	15.2412	67.9755	7.98659	82.8349
Chr9:102026209-102036812	9	102026209	102036812	57.3707	20.8973	78.268	11.0841	96.0626
Chr9:102036842-102047837	9	102036842	102047837	30.8002	43.5569	74.3572	27.5025	80.6425
Chr9:102047997-102061584	9	102047997	102061584	43.0326	32.0984	75.1311	19.8435	85.6721
Chr9:102061630-102072389	9	102061630	102072389	37.5477	40.6329	78.1805	20.3191	91.9897
Chr9:102072455-102082498	9	102072455	102082498	44.9375	29.8766	74.814	16.3344	93.8458
Chr9:102082763-102088804	9	102082763	102088804	51.2439	17.0328	68.2767	5.30796	89.418
Chr9:102088816-102101405	9	102088816	102101405	38.4402	40.4228	78.863	18.2031	95.8137
Chr9:102101506-102111479	9	102101506	102111479	54.1289	29.4107	83.5396	23.0713	95.2795
Chr9:102111538-102122756	9	102111538	102122756	52.2367	32.9685	85.2052	24.1046	92.9223
Chr9:102122851-102133999	9	102122851	102133999	44.0873	41.8156	85.9029	23.2485	94.6432
Chr9:102134136-102143411	9	102134136	102143411	48.1287	29.8927	78.0215	17.2138	92.1308
Chr9:102143412-102153713	9	102143412	102153713	37.4979	46.415	83.9128	28.1677	90.8923
Chr9:102153897-102162222	9	102153897	102162222	59.7745	27.4028	87.1774	20.3694	91.7509
Chr9:102183972-102192995	9	102183972	102192995	42.522	30.6217	73.1437	12.2746	79.321
Chr9:102193126-102202084	9	102193126	102202084	46.5022	44.1852	90.6874	28.0837	90.5683
Chr9:102202092-102213000	9	102202092	102213000	52.3881	31.0919	83.48	36.5026	92.3064
Chr9:102213027-102226218	9	102213027	102226218	35.4158	44.8792	80.295	32.9295	87.7383
Chr9:102226242-102236228	9	102226242	102236228	46.8498	43.3055	90.1553	36.529	93.4028
Chr9:102236267-102246495	9	102236267	102246495	42.9129	39.9322	82.8451	37.3296	93.9424
Chr9:102246555-102254657	9	102246555	102254657	48.4132	36.7056	85.1188	30.1838	94.3275
Chr9:102254744-102263351	9	102254744	102263351	46.9512	44.2426	91.1938	33.377	90.0063
Chr9:102536611-102542573	9	102536611	102542573	40.0265	31.9101	71.9366	25.5491	77.1231
Chr9:108126683-108136056	9	108126683	108136056	34.9434	29.4561	64.3995	19.7951	60.1772
Chr9:113295615-113308452	9	113295615	113308452	51.6936	14.8944	66.588	4.11948	75.4047
Chr9:116046867-116057956	9	116046867	116057956	34.702	28.398	63.1001	15.819	85.7078
Chr10:19608127-19617806	10	19608127	19617806	31.8967	43.2645	75.1612	25.5817	88.5437
Chr10:19629089-19644311	10	19629089	19644311	30.9131	50.9583	81.8714	51.9297	83.5243
Chr10:25595068-25611830	10	25595068	25611830	39.3841	42.0595	81.4436	31.1524	85.8641
Chr10:43059349-43068626	10	43059349	43068626	40.5159	30.7282	71.2441	11.9412	51.4404
Chr10:53411527-53427651	10	53411527	53427651	62.9692	15.5517	78.5209	7.67551	72.074
Chr10:53861534-53880349	10	53861534	53880349	25.2492	67.474	92.7232	33.4864	88.0023
Chr10:72009976-72026256	10	72009976	72026256	31.4188	58.7047	90.1235	44.0722	87.8516
Chr10:83771224-83777678	10	83771224	83777678	35.7416	50.2658	86.0074	63.6431	74.0641
Chr10:91323944-91332199	10	91323944	91332199	32.5394	12.4699	45.0093	3.85185	27.3125
Chr10:110509199-110522259	10	110509199	110522259	29.713	42.3484	72.0614	16.1573	84.5547
Chr10:119037313-119046494	10	119037313	119046494	38.8528	30.3921	69.2449	32.2329	54.897
Chr10:126329555-126338280	10	126329555	126338280	38.6041	35.1398	73.7439	46.3054	59.8308
Chr11:23528694-23535575	11	23528694	23535575	37.9974	39.7325	77.7298	33.8518	66.2735
Chr11:34971672-34984014	11	34971672	34984014	42.0541	24.3414	66.3955	9.50011	53.3369
Chr11:36155869-36163863	11	36155869	36163863	41.4399	18.1165	59.5564	7.45388	71.1335
Chr11:36163981-36172019	11	36163981	36172019	45.8627	23.2413	69.104	15.2526	70.0531
Chr11:36172040-36180849	11	36172040	36180849	36.3551	22.5107	58.8658	12.6412	52.1747
Chr11:40512901-40530883	11	40512901	40530883	37.423	27.7609	65.1839	15.0758	64.66
Chr11:49499178-49515778	11	49499178	49515778	46.6722	22.7409	69.4131	8.69	52.4408
Chr11:61310780-61319085	11	61310780	61319085	43.8003	40.767	84.5673	33.3144	92.9816
Chr11:63455081-63463843	11	63455081	63463843	33.8831	24.2727	58.1558	11.548	32.8769
Chr11:71217889-71239849	11	71217889	71239849	29.0454	36.4757	65.5211	31.2577	74.9245
Chr11:71490918-71504630	11	71490918	71504630	44.0508	21.9805	66.0313	9.00509	73.2655
Chr11:71512644-71525163	11	71512644	71525163	49.0991	15.3907	64.4898	4.77878	61.5943
Chr11:71525330-71542753	11	71525330	71542753	50.246	20.8756	71.1216	15.5125	73.5751
Chr11:81756801-81773518	11	81756801	81773518	34.2209	20.2107	54.4316	13.9881	39.6965
Chr11:89252674-89261092	11	89252674	89261092	17.2031	77.2623	94.4654	71.4353	93.1203
Chr11:89271138-89281158	11	89271138	89281158	28.2555	63.1555	91.411	49.726	95.314
Chr11:99808391-99823606	11	99808391	99823606	58.1456	17.5007	75.6463	12.6453	91.2226
Chr11:120236115-120237126	11	120236115	120237126	7.54873	1.34458	8.89331	1.41447	0.538462
Chr12:9720170-9735218	12	9720170	9735218	33.6846	38.2985	71.9831	40.2739	64.5217
Chr12:50943315-50954128	12	50943315	50954128	39.122	20.9095	60.0316	6.33629	63.2052
Chr12:50954129-50966532	12	50954129	50966532	33.5676	28.2642	61.8318	19.3006	49.3291
Chr12:59317841-59327009	12	59317841	59327009	32.9511	60.2714	93.2225	57.8569	88.166
Chr12:68796391-68813755	12	68796391	68813755	33.9995	39.0409	73.0404	18.1423	75.4458
Chr12:99057399-99067788	12	99057399	99067788	32.1858	40.7271	72.9129	14.9905	63.6476
Chr12:100259015-100269530	12	100259015	100269530	38.5481	47.003	85.5511	30.474	77.131
Chr12:100269637-100277906	12	100269637	100277906	49.908	17.9739	67.8819	6.74899	69.2471
Chr12:109326733-109345655	12	109326733	109345655	47.0337	25.5238	72.5575	24.3574	70.011
Chr12:109345895-109364746	12	109345895	109364746	44.1585	38.1212	82.2798	20.9449	88.5889
Chr13:3421462-3428790	13	3421462	3428790	32.3822	48.9407	81.3229	40.5181	52.3263
Chr13:8433973-8448333	13	8433973	8448333	33.894	22.5949	56.4889	20.3476	62.1773
Chr13:17944259-17950713	13	17944259	17950713	31.4541	14.1457	45.5998	17.0327	59.1391
Chr13:35615480-35630547	13	35615480	35630547	39.8089	43.6303	83.4392	33.6437	77.9391
Chr13:38863007-38882076	13	38863007	38882076	36.404	33.7542	70.1583	21.8751	75.8832
Chr13:38882377-38892866	13	38882377	38892866	43.476	29.3125	72.7885	11.6762	43.3501
Chr13:40069985-40086815	13	40069985	40086815	45.7535	39.5605	85.314	18.976	90.1001
Chr13:40086819-40099805	13	40086819	40099805	41.7286	25.968	67.6966	12.8407	80.3931
Chr13:47500704-47513094	13	47500704	47513094	32.8124	9.57341	42.3858	7.25789	17.5318
Chr13:49943667-49956199	13	49943667	49956199	51.7092	34.4895	86.1987	31.5026	90.5985
Chr13:69272113-69283782	13	69272113	69283782	38.0801	28.6252	66.7054	21.0404	74.011
Chr13:70208205-70218512	13	70208205	70218512	40.9863	23.2491	64.2353	13.4772	63.0125
Chr13:102576494-102588140	13	102576494	102588140	38.6755	29.088	67.7635	10.6732	77.096
Chr13:106452822-106471195	13	106452822	106471195	28.3832	61.2374	89.6205	50.6643	91.6648
Chr13:107546276-107556218	13	107546276	107556218	31.6756	22.5496	54.2252	28.7329	37.3773
Chr14:6604341-6615072	14	6604341	6615072	48.2011	23.1991	71.4002	43.8316	79.1203
Chr14:11469315-11481916	14	11469315	11481916	27.8098	53.2664	81.0762	50.6285	74.469
Chr14:12618832-12630680	14	12618832	12630680	33.6223	51.8623	85.4846	45.9573	90.6101
Chr14:12646869-12661643	14	12646869	12661643	36.4049	40.0559	76.4608	33.483	63.2952
Chr14:12661657-12683624	14	12661657	12683624	31.3042	51.3242	82.6284	32.9456	91.199
Chr14:17619537-17636979	14	17619537	17636979	36.088	39.7935	75.8815	25.8047	55.802
Chr14:32302511-32310864	14	32302511	32310864	35.7101	30.4494	66.1595	19.1117	91.6734
Chr14:39648828-39666114	14	39648828	39666114	32.4598	20.4347	52.8945	15.3442	37.2906
Chr14:43360306-43377149	14	43360306	43377149	38.8218	42.2011	81.0229	33.2741	75.3112
Chr14:44098910-44116716	14	44098910	44116716	32.5395	47.446	79.9855	23.8638	85.3552
Chr14:45344017-45351391	14	45344017	45351391	24.7955	14.9267	39.7222	28.0044	21.8289
Chr14:61229544-61238779	14	61229544	61238779	29.6682	14.5576	44.2258	4.56416	60.4123
Chr14:66047529-66055082	14	66047529	66055082	37.3214	29.1916	66.513	15.5918	71.3124
Chr14:99865346-99873972	14	99865346	99873972	49.0185	16.9762	65.9947	5.66323	68.2779
Chr14:99885099-99895389	14	99885099	99895389	46.7442	26.6312	73.3754	8.55324	73.8889
Chr14:99895481-99903053	14	99895481	99903053	46.6674	25.1154	71.7828	3.44551	78.7619
Chr14:99903341-99912967	14	99903341	99912967	42.4753	23.7505	66.2258	12.7399	67.7308
Chr14:99913064-99925316	14	99913064	99925316	53.9105	26.6865	80.597	4.25724	73.4308
Chr14:103843056-103847268	14	103843056	103847268	49.6958	25.1627	74.8585	25.1595	87.7276
Chr14:103887210-103899171	14	103887210	103899171	37.4376	24.791	62.2286	8.09473	79.9082
Chr15:10923403-10939471	15	10923403	10939471	32.1848	51.351	83.5358	41.0167	84.921
Chr15:25284609-25291716	15	25284609	25291716	41.4163	19.2415	60.6578	7.27264	52.4047
Chr15:31105219-31120141	15	31105219	31120141	28.3458	50.4716	78.8173	47.7069	85.7412
Chr15:72505859-72512989	15	72505859	72512989	40.5158	45.8792	86.3951	28.6451	93.3482
Chr15:79934543-79940973	15	79934543	79940973	57.2006	30.3223	87.5229	20.3134	84.7783
Chr15:79947296-79952878	15	79947296	79952878	36.1465	25.3752	61.5217	16.0557	51.1452
Chr15:79952912-79958766	15	79952912	79958766	42.2348	48.8862	91.121	32.9933	89.0651
Chr15:79958831-79964782	15	79958831	79964782	52.8649	40.8429	93.7079	27.56	85.4823
Chr15:80490841-80499978	15	80490841	80499978	54.9775	17.495	72.4724	2.99256	72.0392
Chr15:80500120-80510952	15	80500120	80510952	53.4337	27.8604	81.2942	7.48021	79.8751
Chr15:80511062-80520154	15	80511062	80520154	53.1685	20.4153	73.5838	6.99609	75.4764
Chr15:80520384-80530189	15	80520384	80530189	61.1935	24.1709	85.3644	7.61534	69.3386
Chr15:80530304-80535624	15	80530304	80535624	54.8488	21.4949	76.3437	5.13064	73.9988
Chr15:80547927-80559746	15	80547927	80559746	67.6663	20.3737	88.04	5.33263	82.8272
Chr15:80559763-80565552	15	80559763	80565552	39.1512	15.1238	54.275	2.18303	42.4597
Chr15:91207836-91219673	15	91207836	91219673	32.6228	60.9659	93.5887	55.3246	92.7203
Chr15:91219680-91237540	15	91219680	91237540	36.7119	56.0421	92.7539	43.2143	90.7976
Chr15:91248176-91257100	15	91248176	91257100	26.4915	65.6954	92.1869	52.1002	93.5861
Chr15:91836962-91850924	15	91836962	91850924	36.4003	32.5868	68.9871	14.5869	65.7809
Chr16:22395615-22401446	16	22395615	22401446	32.3423	35.9122	68.2546	25.5722	65.9139
Chr16:29409052-29420174	16	29409052	29420174	22.8885	64.5188	87.4074	60.1715	91.8158
Chr16:38255591-38267154	16	38255591	38267154	43.28	31.8803	75.1603	18.2794	85.675
Chr16:39202434-39220624	16	39202434	39220624	39.6896	22.6655	62.3551	12.8458	36.2352
Chr16:39220659-39234433	16	39220659	39234433	42.3876	26.4737	68.8613	9.76429	59.4828
Chr16:39267164-39287306	16	39267164	39287306	33.8154	49.2617	83.077	35.4031	83.2619
Chr16:39287323-39306419	16	39287323	39306419	41.0013	39.6089	80.6103	21.7777	73.7851
Chr16:41423280-41440291	16	41423280	41440291	35.4597	28.7083	64.168	17.5838	77.9835
Chr16:57606480-57612943	16	57606480	57612943	32.7267	16.7549	49.4816	17.6259	22.2594
Chr16:78576419-78579048	16	78576419	78579048	15.8819	6.77081	22.6527	14.7551	21.2611
Chr16:78579148-78589499	16	78579148	78589499	28.9739	55.9963	84.9702	57.5931	82.0101
Chr17:7348351-7356468	17	7348351	7356468	38.8143	15.7897	54.604	5.65028	60.1275
Chr17:7356516-7364726	17	7356516	7364726	45.1447	25.5283	70.6729	9.79448	80.3577
Chr17:7364751-7373112	17	7364751	7373112	64.1128	23.7191	87.8319	7.50332	86.8804
Chr17:7373154-7383490	17	7373154	7383490	52.4035	17.4752	69.8787	6.01839	81.3348
Chr17:7394438-7404136	17	7394438	7404136	55.007	18.4355	73.4424	5.90164	83.9539
Chr17:7861726-7868682	17	7861726	7868682	31.6125	43.0942	74.7067	44.5398	76.6204
Chr17:37259742-37274881	17	37259742	37274881	24.3513	11.8243	36.1756	15.3326	64.5127
Chr17:42728805-42742402	17	42728805	42742402	39.7873	35.5723	75.3596	25.9411	80.5601
Chr17:67545767-67550737	17	67545767	67550737	12.8306	83.6691	96.4997	84.9	93.9224
Chr17:67656063-67667492	17	67656063	67667492	40.6034	27.7804	68.3838	19.8545	57.9263
Chr17:86210212-86217683	17	86210212	86217683	38.1303	32.8899	71.0202	9.10542	89.4043
Chr17:92992073-93017088	17	92992073	93017088	29.6743	57.4392	87.1136	44.3094	95.3343
Chr17:94502424-94522618	17	94502424	94522618	41.4102	33.8916	75.3018	31.4979	73.4076
Chr18:14262182-14274133	18	14262182	14274133	18.5649	76.7129	95.2778	65.6183	91.8821
Chr18:14274170-14285786	18	14274170	14285786	28.685	58.7946	87.4797	53.7926	87.271
Chr18:15338222-15351618	18	15338222	15351618	30.8923	33.2986	64.1908	15.5266	51.476
Chr18:45555596-45559321	18	45555596	45559321	32.9982	7.3566	40.3548	13.4468	82.7999
Chr18:63530558-63540716	18	63530558	63540716	37.0972	33.3931	70.4903	15.7378	83.3902
Chr18:64312335-64326020	18	64312335	64326020	23.8419	69.2131	93.055	61.3368	94.6317
Chr18:65901818-65908932	18	65901818	65908932	21.3713	70.9314	92.3027	63.2124	94.3977
Chr18:69706143-69718519	18	69706143	69718519	33.8613	32.9873	66.8486	21.702	81.5643
Chr18:74063432-74064924	18	74063432	74064924	4.3536	0.120192	4.47379	0.3003	1.14245
Chr18:78342468-78350750	18	78342468	78350750	42.6078	24.5926	67.2004	11.8191	85.2663
Chr18:78350800-78362536	18	78350800	78362536	37.288	39.017	76.305	19.6237	87.6068
Chr18:78362593-78373165	18	78362593	78373165	55.3382	18.134	73.4722	14.137	72.4614
Chr18:78389435-78400202	18	78389435	78400202	39.6984	39.7868	79.4852	33.3929	68.9937
Chr18:78400250-78414965	18	78400250	78414965	38.4023	47.6406	86.0429	37.1862	97.8702
Chr18:81812022-81821824	18	81812022	81821824	28.0646	17.9024	45.967	4.9167	59.1362
Chr18:83482962-83490639	18	83482962	83490639	38.7199	38.56	77.28	18.8162	63.5321
Chr18:85835154-85853551	18	85835154	85853551	54.8332	29.3982	84.2314	10.0394	76.9805
Chr19:27148479-27159745	19	27148479	27159745	34.3302	22.3699	56.7001	3.95313	42.2893
Chr19:42284004-42291476	19	42284004	42291476	50.6482	33.3314	83.9796	33.767	78.6039
Chr19:47745366-47755266	19	47745366	47755266	36.1239	55.7239	91.8479	71.3949	94.1885
Chr19:48360245-48369308	19	48360245	48369308	29.0672	49.0358	78.103	37.1262	83.1646
Chr19:56098694-56105642	19	56098694	56105642	37.7511	14.8735	52.6247	10.2173	61.2271
Chr19:56105688-56113583	19	56105688	56113583	41.3384	26.8603	68.1987	14.8644	74.7989
Chr19:57524420-57533951	19	57524420	57533951	30.3003	57.5829	87.8833	54.5346	94.0858
Chr19:58465773-58473830	19	58465773	58473830	43.0247	20.0369	63.0617	9.36593	61.2807
ChrX:5172945-5196140	X	5172945	5196140	25.4455	54.5371	79.9826	45.3258	52.615
ChrX:5757351-5784065	X	5757351	5784065	32.2744	33.7427	66.0171	27.7822	53.5872
ChrX:8768364-8777035	X	8768364	8777035	30.6911	55.8921	86.5832	41.0341	81.5033
ChrX:9078557-9090037	X	9078557	9090037	31.97	34.8925	66.8625	25.8957	56.5248
ChrX:9615400-9626147	X	9615400	9626147	24.3843	52.0203	76.4046	40.6118	62.0791
ChrX:12478150-12491520	X	12478150	12491520	31.5678	17.8928	49.4606	12.3372	24.8621
ChrX:31128855-31151373	X	31128855	31151373	21.2646	40.9577	62.2223	34.9485	21.7463
ChrX:50975094-50991369	X	50975094	50991369	39.5086	40.7247	80.2333	23.6062	70.3405
ChrX:59819958-59839977	X	59819958	59839977	26.6824	64.3836	91.066	64.1268	66.933
ChrX:70361570-70369981	X	70361570	70369981	52.5299	30.3571	82.887	56.1829	89.1723
ChrX:77934488-77941073	X	77934488	77941073	43.1898	41.0306	84.2203	34.7134	63.3014
ChrX:148791318-148801895	X	148791318	148801895	26.0083	64.0837	90.0921	43.4633	80.0976
ChrX:150834202-150848589	X	150834202	150848589	26.7984	47.6422	74.4406	28.2659	79.3814
ChrX:156133689-156154321	X	156133689	156154321	19.0075	76.5802	95.5878	66.6573	86.7565
ChrX:166949228-166968652	X	166949228	166968652	47.3524	46.9386	94.2909	44.6039	92.5983
ChrX:167036460-167054571	X	167036460	167054571	37.8472	55.6684	93.5156	44.971	91.0039
ChrX:169459405-169487947	X	169459405	169487947	31.6928	44.7503	76.4431	36.8484	70.8294
ChrY:90743905-90746994	Y	90743905	90746994	20.3644	68.0729	88.4372	69.7755	76.0992
				39.4256
				38.0388

## Sheet: Ehmt2 cKO hypo DMRs
Probe	Chromosome	Start	End	Difference (Ehmt2 cKO-Ehmt2 Control )	Ehmt2 Control	Ehmt2 cKO	Ehmt1/2 Control	Ehmt1/2 cDKO
Chr1:52122396-52130859	1	52122396	52130859	-40.5635	67.4723	26.9088	68.9628	50.7021
Chr1:52143577-52149629	1	52143577	52149629	-33.1538	89.4903	56.3365	77.8162	64.3817
Chr1:52149764-52155508	1	52149764	52155508	-35.079	76.6123	41.5333	69.1333	62.8969
Chr1:63288384-63303464	1	63288384	63303464	-52.2414	84.7778	32.5363	80.166	27.9466
Chr1:63476749-63487402	1	63476749	63487402	-28.0223	63.4813	35.4589	62.767	57.2482
Chr1:63487430-63501415	1	63487430	63501415	-32.1829	64.3102	32.1273	42.8039	39.9722
Chr1:75238728-75243683	1	75238728	75243683	-36.8865	91.8287	54.9423	89.4793	44.5114
Chr1:75243712-75250196	1	75243712	75250196	-35.0066	93.9295	58.923	86.7022	54.5404
Chr1:76025154-76038372	1	76025154	76038372	-34.6741	50.5318	15.8578	29.4559	28.4767
Chr1:76038460-76052018	1	76038460	76052018	-36.5123	62.1735	25.6612	38.166	26.5961
Chr1:76181770-76197293	1	76181770	76197293	-35.6022	62.3026	26.7005	32.9193	29.6038
Chr1:86300949-86303984	1	86300949	86303984	-19.5045	26.1933	6.68887	19.6698	2.85849
Chr1:104738597-104754835	1	104738597	104754835	-15.7618	23.2002	7.43848	0.584795	3.72168
Chr1:105312856-105328877	1	105312856	105328877	-27.5094	73.363	45.8536	58.5723	17.7096
Chr1:118835483-118838381	1	118835483	118838381	-31.9738	87.2509	55.2771	82.0672	44.7665
Chr1:118838724-118846587	1	118838724	118846587	-25.6248	92.1788	66.554	85.9573	61.7939
Chr1:118855631-118863887	1	118855631	118863887	-22.9186	83.5694	60.6508	82.4924	50.4502
Chr1:118863910-118873263	1	118863910	118873263	-28.5029	84.2329	55.73	75.0392	41.4977
Chr1:118873284-118882993	1	118873284	118882993	-23.148	89.1109	65.9629	85.1521	59.3804
Chr1:118891771-118900709	1	118891771	118900709	-25.7943	87.3152	61.5209	78.5216	48.2744
Chr1:118900713-118908796	1	118900713	118908796	-37.0669	88.7136	51.6468	82.3671	65.0067
Chr1:131832600-131842212	1	131832600	131842212	-49.1262	79.4994	30.3732	76.4644	36.552
Chr1:131842335-131847801	1	131842335	131847801	-35.8196	71.1377	35.3181	66.8857	33.5708
Chr1:135227668-135233794	1	135227668	135233794	-43.1586	73.9193	30.7607	52.872	35.9252
Chr1:136964180-136974383	1	136964180	136974383	-29.1823	49.1594	19.977	39.3662	13.9839
Chr1:153280715-153289190	1	153280715	153289190	-19.0313	86.8971	67.8657	83.7268	65.9375
Chr1:164212317-164220324	1	164212317	164220324	-33.236	62.5805	29.3445	47.8413	54.5887
Chr1:167246905-167252283	1	167246905	167252283	-27.1684	35.9936	8.82519	33.1163	3.9904
Chr1:170149433-170159404	1	170149433	170159404	-36.9919	81.8682	44.8762	71.3531	35.0546
Chr1:170159508-170170994	1	170159508	170170994	-36.0748	66.9922	30.9174	43.6114	21.7877
Chr1:172036745-172046736	1	172036745	172046736	-35.9765	52.1855	16.209	26.9285	4.23566
Chr1:176397068-176415568	1	176397068	176415568	-34.312	55.5246	21.2126	28.4338	12.1937
Chr1:176432991-176447001	1	176432991	176447001	-30.3103	56.1768	25.8665	44.9034	25.8624
Chr1:180768226-180775560	1	180768226	180775560	-27.7074	40.7637	13.0563	27.4461	7.39019
Chr1:181693474-181704523	1	181693474	181704523	-35.4334	77.9138	42.4804	75.3785	45.5094
Chr1:181736504-181745890	1	181736504	181745890	-41.2734	64.2642	22.9908	55.9482	17.4634
Chr1:181745899-181752953	1	181745899	181752953	-41.1263	66.8407	25.7144	44.4604	20.1214
Chr1:181752970-181759490	1	181752970	181759490	-44.0019	66.0574	22.0555	55.4258	14.4826
Chr1:181759562-181768770	1	181759562	181768770	-38.8575	61.5656	22.7081	47.0234	6.13757
Chr1:181795876-181804297	1	181795876	181804297	-33.5492	57.1483	23.5991	43.8411	7.91995
Chr1:181804382-181813107	1	181804382	181813107	-32.3452	63.8452	31.5	43.4755	20.5421
Chr1:184830624-184838710	1	184830624	184838710	-27.2105	89.3258	62.1154	83.785	34.1114
Chr1:184838741-184845289	1	184838741	184845289	-36.0717	69.5476	33.4759	56.8576	23.025
Chr1:186563682-186573765	1	186563682	186573765	-43.0543	73.8203	30.766	51.3593	34.229
Chr1:189880320-189884081	1	189880320	189884081	-33.9346	63.7479	29.8133	52.0652	47.2555
Chr1:189889289-189894529	1	189889289	189894529	-32.7409	77.3113	44.5704	58.7034	72.3992
Chr1:191993307-192000002	1	191993307	192000002	-25.7127	81.2149	55.5023	68.8161	44.6106
Chr1:192000009-192060983	1	192000009	192060983	-27.0922	80.1884	53.0962	67.0893	51.4524
Chr1:192070623-192085449	1	192070623	192085449	-23.1482	86.0946	62.9464	86.1109	66.4354
Chr1:192890588-192902935	1	192890588	192902935	-34.3051	77.7859	43.4808	70.4797	60.3637
Chr1:192903136-192923144	1	192903136	192923144	-23.718	84.9189	61.201	75.2422	64.6348
Chr2:9626201-9636302	2	9626201	9636302	-36.2729	53.5453	17.2724	29.3154	42.7677
Chr2:13271920-13279696	2	13271920	13279696	-30.3812	59.2076	28.8263	51.2462	45.2404
Chr2:13427094-13443213	2	13427094	13443213	-44.1014	78.7997	34.6983	69.0696	74.2202
Chr2:25490942-25500162	2	25490942	25500162	-29.1698	71.8591	42.6893	63.7919	32.5099
Chr2:27035049-27043924	2	27035049	27043924	-28.7448	48.7423	19.9976	31.2275	17.2541
Chr2:27794864-27804108	2	27794864	27804108	-35.4058	57.7605	22.3547	63.2392	72.4534
Chr2:27815451-27824495	2	27815451	27824495	-32.0654	56.3103	24.2449	47.182	67.7279
Chr2:28961352-28969505	2	28961352	28969505	-30.5698	64.0156	33.4457	63.916	88.1849
Chr2:30186794-30194044	2	30186794	30194044	-36.4884	89.8771	53.3887	89.8026	36.5269
Chr2:30801895-30807975	2	30801895	30807975	-8.58136	12.6838	4.10244	4.58284	1.97062
Chr2:32199308-32204296	2	32199308	32204296	-22.5819	90.8727	68.2908	89.9173	34.4797
Chr2:32204318-32210530	2	32204318	32210530	-19.8266	94.3047	74.4781	87.7962	48.0597
Chr2:32210584-32214365	2	32210584	32214365	-26.5012	64.0533	37.5521	53.2142	9.15449
Chr2:32380041-32383158	2	32380041	32383158	-9.54214	12.382	2.83985	10.1774	5.82433
Chr2:35022763-35031812	2	35022763	35031812	-25.2072	88.1491	62.9419	86.9336	83.0315
Chr2:35093923-35103656	2	35093923	35103656	-38.1208	68.8515	30.7308	65.0626	21.7066
Chr2:49880515-49891686	2	49880515	49891686	-23.8532	86.9808	63.1275	78.4756	76.3328
Chr2:49903413-49913640	2	49903413	49913640	-33.1155	75.6517	42.5362	63.396	58.2753
Chr2:57339956-57350180	2	57339956	57350180	-33.6046	47.4481	13.8435	39.5699	9.22824
Chr2:57350231-57358923	2	57350231	57358923	-45.0722	72.6018	27.5295	59.4415	13.4866
Chr2:72070633-72080952	2	72070633	72080952	-25.2537	44.3789	19.1252	27.7213	8.01754
Chr2:72221287-72227501	2	72221287	72227501	-58.6444	82.1011	23.4568	66.4876	23.6949
Chr2:75467640-75477129	2	75467640	75477129	-37.0224	67.4175	30.395	42.1665	26.2375
Chr2:128698964-128706317	2	128698964	128706317	-25.6297	44.8288	19.1991	51.5238	14.6533
Chr2:128731232-128739513	2	128731232	128739513	-41.5357	72.9124	31.3767	77.2673	72.8241
Chr2:128739517-128749349	2	128739517	128749349	-43.3544	65.7741	22.4197	68.0187	72.1743
Chr2:128749387-128759942	2	128749387	128759942	-38.9618	65.6294	26.6676	63.1687	66.8751
Chr2:135963500-135969154	2	135963500	135969154	-24.7016	44.0111	19.3095	19.4216	30.9088
Chr2:136224879-136238388	2	136224879	136238388	-36.63	79.9107	43.2808	68.3559	50.8922
Chr2:136313966-136338838	2	136313966	136338838	-52.2864	67.2187	14.9323	69.1433	59.9078
Chr2:136358872-136385101	2	136358872	136385101	-47.2619	80.1466	32.8846	78.4528	79.0287
Chr2:141343455-141362175	2	141343455	141362175	-30.5421	50.737	20.1949	19.7769	25.5833
Chr2:155538792-155556438	2	155538792	155556438	-44.3159	83.0658	38.7499	72.987	38.561
Chr2:155568493-155578772	2	155568493	155578772	-19.5584	96.4106	76.8522	93.8897	88.5113
Chr2:155578945-155588185	2	155578945	155588185	-26.325	87.9555	61.6305	85.3593	64.3912
Chr2:158696130-158702025	2	158696130	158702025	-35.9096	57.5551	21.6455	49.7737	69.0525
Chr2:158770190-158776244	2	158770190	158776244	-40.6189	74.4034	33.7845	73.1518	25.5684
Chr2:160896469-160905043	2	160896469	160905043	-22.7723	91.6724	68.9001	90.9096	49.9253
Chr2:163204330-163206437	2	163204330	163206437	-8.51575	9.51065	0.994904	6.82245	1.00402
Chr2:163206472-163215239	2	163206472	163215239	-36.1348	67.084	30.9492	63.0501	11.5022
Chr2:163215262-163221555	2	163215262	163221555	-47.9423	74.5257	26.5835	60.7059	8.82235
Chr2:163228890-163234619	2	163228890	163234619	-48.4021	74.7496	26.3475	70.3635	11.6667
Chr2:163234620-163242561	2	163234620	163242561	-42.0805	72.0397	29.9592	64.0996	13.8591
Chr2:163242571-163250951	2	163242571	163250951	-38.5553	87.8387	49.2833	86.6692	35.7824
Chr2:163250995-163256736	2	163250995	163256736	-34.4932	58.8959	24.4027	39.7715	7.21514
Chr2:163256754-163265498	2	163256754	163265498	-38.2157	92.582	54.3662	88.4549	26.7555
Chr2:163265505-163273368	2	163265505	163273368	-35.829	84.6809	48.8519	86.3076	30.8691
Chr2:163285643-163292012	2	163285643	163292012	-37.7565	54.2323	16.4757	51.9286	4.35849
Chr2:163292187-163300052	2	163292187	163300052	-52.0752	81.0657	28.9906	74.3302	32.8886
Chr2:163300055-163305773	2	163300055	163305773	-40.8997	59.1495	18.2498	47.8671	3.65115
Chr2:163305787-163310924	2	163305787	163310924	-41.6432	66.1008	24.4576	62.5121	8.29619
Chr2:163311071-163318602	2	163311071	163318602	-27.9824	66.4956	38.5132	62.7006	13.0282
Chr2:163318961-163324076	2	163318961	163324076	-40.5033	90.8414	50.3381	82.9942	33.0353
Chr2:167084059-167092436	2	167084059	167092436	-30.6077	56.1998	25.5921	54.0392	15.0584
Chr2:168311641-168317091	2	168311641	168317091	-59.5778	82.7446	23.1668	85.3628	12.3779
Chr2:168317137-168324346	2	168317137	168324346	-34.1844	57.4973	23.313	47.7233	4.49612
Chr2:168324399-168332402	2	168324399	168332402	-61.7083	78.3844	16.6761	76.3594	10.9171
Chr2:169987058-169992891	2	169987058	169992891	-38.0632	59.2861	21.2228	40.392	4.11658
Chr2:170195249-170201754	2	170195249	170201754	-28.2873	63.7515	35.4642	36.5975	15.3185
Chr2:173607401-173614516	2	173607401	173614516	-19.7845	78.1573	58.3728	80.9294	73.3203
Chr2:173640279-173647660	2	173640279	173647660	-24.8499	79.0655	54.2156	68.4993	68.9934
Chr2:179652827-179660631	2	179652827	179660631	-18.5963	83.7153	65.119	74.096	42.7048
Chr2:179660827-179666636	2	179660827	179666636	-37.6177	70.7602	33.1425	57.3743	18.2118
Chr2:179685620-179693458	2	179685620	179693458	-34.6356	64.1774	29.5418	59.6894	18.7799
Chr2:179799526-179806320	2	179799526	179806320	-33.8354	86.7871	52.9517	77.5898	23.7508
Chr3:10309341-10316275	3	10309341	10316275	-40.9298	66.659	25.7292	41.3758	25.8202
Chr3:10316277-10323867	3	10316277	10323867	-44.6018	77.0626	32.4608	76.1639	24.745
Chr3:34112343-34121477	3	34112343	34121477	-26.6925	81.2515	54.559	84.2418	40.6659
Chr3:34232370-34242943	3	34232370	34242943	-33.2909	57.6507	24.3597	48.2834	8.70285
Chr3:34293790-34308127	3	34293790	34308127	-37.8209	67.034	29.2131	65.1062	15.4588
Chr3:34353722-34364253	3	34353722	34364253	-31.5369	73.1001	41.5633	73.7509	22.4868
Chr3:34364471-34375261	3	34364471	34375261	-35.3494	89.8355	54.4861	78.2498	31.2701
Chr3:34375361-34388547	3	34375361	34388547	-29.036	74.4324	45.3964	68.8319	40.0181
Chr3:34388570-34398308	3	34388570	34398308	-38.6382	87.6413	49.0032	81.4618	37.7482
Chr3:35951325-35963206	3	35951325	35963206	-34.7717	88.0382	53.2664	78.2566	38.0067
Chr3:35963236-35971716	3	35963236	35971716	-36.106	89.6067	53.5007	89.203	51.6358
Chr3:35971744-35976529	3	35971744	35976529	-31.2025	96.3516	65.1491	90.0422	73.6333
Chr3:35976543-35987265	3	35976543	35987265	-18.8667	94.0312	75.1645	97.3071	86.415
Chr3:35987321-35995858	3	35987321	35995858	-31.73	93.7095	61.9795	90.8399	63.9896
Chr3:54783753-54791140	3	54783753	54791140	-33.9883	52.7378	18.7495	26.7486	7.54232
Chr3:67374766-67397895	3	67374766	67397895	-44.7197	69.2477	24.528	52.9915	23.2905
Chr3:79359141-79371825	3	79359141	79371825	-41.0096	65.6562	24.6466	67.4881	53.9125
Chr3:79507854-79517092	3	79507854	79517092	-16.1972	92.5394	76.3421	87.5774	77.6146
Chr3:88239323-88243614	3	88239323	88243614	-38.6625	56.0547	17.3922	46.059	16.1429
Chr3:89877604-89886302	3	89877604	89886302	-49.6811	70.9787	21.2976	59.0332	53.4558
Chr3:89886304-89895981	3	89886304	89895981	-21.7557	36.0309	14.2752	24.6289	16.2328
Chr3:95994836-95996047	3	95994836	95996047	-20.0937	24.612	4.51833	18.0065	12.4157
Chr3:101818727-101826910	3	101818727	101826910	-46.932	82.5679	35.6359	77.3898	14.1686
Chr3:101826920-101835508	3	101826920	101835508	-46.4982	83.1559	36.6577	75.1632	9.54683
Chr3:104799141-104805056	3	104799141	104805056	-33.7923	71.7284	37.9362	52.6429	64.4684
Chr3:104961395-104962419	3	104961395	104962419	-30.1873	33.7912	3.60389	28.6713	4.21103
Chr3:105539915-105549802	3	105539915	105549802	-33.688	74.574	40.886	60.4036	75.5741
Chr3:108090663-108098032	3	108090663	108098032	-36.0154	76.6767	40.6614	71.7923	47.6373
Chr3:115916158-115924742	3	115916158	115924742	-32.1621	91.2716	59.1095	54.9131	52.9021
Chr3:116543459-116550147	3	116543459	116550147	-46.1992	82.5802	36.3809	63.7124	31.0909
Chr3:121343382-121349798	3	121343382	121349798	-24.1488	84.9465	60.7977	68.99	38.3724
Chr3:122639021-122649636	3	122639021	122649636	-34.9559	54.1544	19.1985	17.2058	16.5961
Chr3:133605067-133617179	3	133605067	133617179	-33.2031	79.304	46.1009	74.8061	23.6182
Chr3:135627661-135635663	3	135627661	135635663	-28.7845	93.0425	64.258	75.0999	41.3687
Chr3:136547778-136567366	3	136547778	136567366	-50.3302	82.3512	32.0209	59.2585	77.9458
Chr3:136712614-136724388	3	136712614	136724388	-35.9375	56.7838	20.8463	35.844	9.93721
Chr3:136776156-136786051	3	136776156	136786051	-35.2261	53.8411	18.615	34.7159	3.79939
Chr3:136828546-136836151	3	136828546	136836151	-28.4009	34.2765	5.87556	12.0327	4.04907
Chr3:136836210-136848118	3	136836210	136848118	-35.4593	63.9018	28.4425	67.6272	27.3706
Chr3:136862368-136874840	3	136862368	136874840	-37.8978	72.5401	34.6423	63.8711	22.2889
Chr3:136887713-136896289	3	136887713	136896289	-43.3208	92.0802	48.7594	83.9339	29.1874
Chr3:136912735-136922655	3	136912735	136922655	-30.4357	92.1009	61.6653	93.2324	58.9027
Chr3:136922803-136932503	3	136922803	136932503	-28.0562	93.9021	65.8459	78.5105	39.3625
Chr4:20046599-20062957	4	20046599	20062957	-40.2061	75.7673	35.5613	75.463	69.7654
Chr4:43661044-43668678	4	43661044	43668678	-33.3146	54.9303	21.6157	55.1342	21.9255
Chr4:45065397-45074300	4	45065397	45074300	-17.4146	87.0015	69.5869	89.5713	52.019
Chr4:48514109-48528161	4	48514109	48528161	-35.018	72.0047	36.9867	59.5471	36.2149
Chr4:57210114-57218533	4	57210114	57218533	-44.737	78.2925	33.5555	72.4001	25.0907
Chr4:57252907-57258852	4	57252907	57258852	-39.7273	50.0074	10.2802	38.5628	12.1262
Chr4:57258918-57266522	4	57258918	57266522	-36.9029	63.997	27.0941	63.0541	17.0786
Chr4:58610787-58619186	4	58610787	58619186	-33.2522	50.6071	17.3549	28.0398	11.165
Chr4:59040582-59052914	4	59040582	59052914	-44.9858	69.8457	24.8599	64.8678	14.5703
Chr4:83278503-83285874	4	83278503	83285874	-23.3681	67.2725	43.9044	63.473	53.9603
Chr4:89137436-89142136	4	89137436	89142136	-18.4388	28.653	10.2142	37.5046	4.43518
Chr4:89158408-89167394	4	89158408	89167394	-12.5452	95.7331	83.188	93.0203	74.7344
Chr4:99933749-99941457	4	99933749	99941457	-49.5157	80.619	31.1033	68.2337	29.6807
Chr4:99941495-99951648	4	99941495	99951648	-57.126	91.9966	34.8707	85.7249	42.2004
Chr4:99951697-99960398	4	99951697	99960398	-37.567	70.1201	32.5531	77.6486	36.6138
Chr4:99960432-99968722	4	99960432	99968722	-39.055	92.7601	53.7051	93.2953	60.2088
Chr4:99968954-99978934	4	99968954	99978934	-37.8492	91.1159	53.2667	92.5379	58.1498
Chr4:99978944-99986618	4	99978944	99986618	-40.1317	93.3944	53.2627	92.2439	44.8638
Chr4:103115001-103119492	4	103115001	103119492	-46.5838	61.839	15.2551	53.8652	26.8334
Chr4:116805541-116808661	4	116805541	116808661	-25.0567	86.2699	61.2131	85.9675	34.5287
Chr4:125119525-125124326	4	125119525	125124326	-19.8862	91.3522	71.466	83.199	37.0581
Chr4:126747036-126751847	4	126747036	126751847	-16.5957	92.3745	75.7788	84.0253	60.4074
Chr4:130958020-130966872	4	130958020	130966872	-38.37	79.7322	41.3622	69.0144	42.6035
Chr4:130966941-130974998	4	130966941	130974998	-38.9188	84.4666	45.5478	80.0188	62.5379
Chr4:130975062-130982012	4	130975062	130982012	-43.862	71.1308	27.2689	67.8002	27.4436
Chr4:130982104-130989356	4	130982104	130989356	-49.4148	79.6015	30.1867	64.2081	40.4348
Chr4:132492601-132497500	4	132492601	132497500	-29.4317	86.5895	57.1578	78.8298	47.0185
Chr4:134703612-134704340	4	134703612	134704340	-4.16791	4.91077	0.742862	4.71969	0.611672
Chr4:140611019-140616687	4	140611019	140616687	-29.1151	81.7201	52.605	70.4307	12.8708
Chr4:140637506-140643204	4	140637506	140643204	-24.6215	88.6437	64.0222	93.2433	27.2959
Chr4:141218151-141224532	4	141218151	141224532	-46.1641	58.9757	12.8116	46.2648	8.30688
Chr4:141817855-141823931	4	141817855	141823931	-32.3944	84.7787	52.3843	77.2769	29.3971
Chr4:141971309-141978196	4	141971309	141978196	-26.949	84.1529	57.204	80.7349	42.4516
Chr4:141978209-141985169	4	141978209	141985169	-36.402	86.026	49.624	76.1858	46.4749
Chr4:142226383-142232507	4	142226383	142232507	-32.8297	59.9533	27.1236	68.3333	59.9055
Chr4:142238626-142239658	4	142238626	142239658	-20.5539	24.7548	4.20097	31.4069	18.3641
Chr4:147910006-147916594	4	147910006	147916594	-42.8546	92.5327	49.6782	86.5514	24.0599
Chr4:147922298-147927538	4	147922298	147927538	-43.0482	76.6826	33.6344	58.3751	14.537
Chr4:149642979-149646865	4	149642979	149646865	-10.5645	93.1693	82.6048	77.5824	43.8152
Chr4:149895883-149901620	4	149895883	149901620	-36.6706	68.9867	32.3162	64.6056	20.2313
Chr4:149902029-149906966	4	149902029	149906966	-36.5384	76.7988	40.2604	72.4438	29.5298
Chr4:149906986-149913106	4	149906986	149913106	-32.6831	82.5505	49.8674	69.6541	42.7069
Chr4:149938784-149944940	4	149938784	149944940	-43.5487	60.4004	16.8517	46.7181	16.4827
Chr4:150120093-150126850	4	150120093	150126850	-33.2253	71.3471	38.1218	57.4939	6.83792
Chr4:152177942-152179387	4	152177942	152179387	-4.94937	6.63051	1.68114	1.50463	1.72523
Chr4:152656981-152665298	4	152656981	152665298	-24.7676	70.6306	45.863	70.8368	39.3574
Chr4:155269401-155276360	4	155269401	155276360	-36.2607	63.979	27.7184	42.031	71.0104
Chr5:4089204-4100132	5	4089204	4100132	-34.5521	83.3872	48.8351	68.9256	56.673
Chr5:5631778-5648423	5	5631778	5648423	-41.4704	64.0121	22.5418	33.6738	14.4066
Chr5:24971389-24977156	5	24971389	24977156	-33.4586	74.7955	41.3369	74.6676	80.6978
Chr5:31093152-31094988	5	31093152	31094988	-20.1866	24.3176	4.13097	11.7708	1.55257
Chr5:31871004-31887507	5	31871004	31887507	-36.6138	83.6795	47.0657	56.8672	41.2896
Chr5:31918843-31931402	5	31918843	31931402	-34.0458	81.6355	47.5897	59.1592	30.2176
Chr5:31931425-31947772	5	31931425	31947772	-40.4065	75.1142	34.7077	67.6889	24.9534
Chr5:31971905-31984892	5	31971905	31984892	-34.6577	68.4693	33.8116	51.1216	26.1808
Chr5:35687166-35695510	5	35687166	35695510	-40.4072	59.0259	18.6187	49.7764	21.3465
Chr5:35695548-35703325	5	35695548	35703325	-29.431	80.9281	51.4971	78.3056	39.2727
Chr5:35703340-35709648	5	35703340	35709648	-13.0079	95.2571	82.2491	94.5303	78.3176
Chr5:35728785-35739039	5	35728785	35739039	-29.6185	54.551	24.9325	48.8573	20.1461
Chr5:36385472-36393597	5	36385472	36393597	-26.0172	77.9569	51.9396	71.642	46.8447
Chr5:36403260-36417463	5	36403260	36417463	-39.0333	75.2894	36.2561	59.1571	14.4032
Chr5:36417470-36428194	5	36417470	36428194	-44.0569	75.4139	31.3571	58.601	12.0273
Chr5:37300834-37310285	5	37300834	37310285	-34.3144	64.6823	30.3679	54.8522	49.05
Chr5:37318900-37329358	5	37318900	37329358	-31.7675	82.9478	51.1803	66.4443	77.5973
Chr5:37330009-37336732	5	37330009	37336732	-19.7674	34.0225	14.2551	29.6846	15.8956
Chr5:37340049-37353049	5	37340049	37353049	-32.8448	76.4445	43.5997	70.6756	59.6411
Chr5:37353127-37365133	5	37353127	37365133	-36.9728	67.6145	30.6418	45.5213	25.1475
Chr5:37365155-37376400	5	37365155	37376400	-40.4866	79.6131	39.1265	69.5988	52.4769
Chr5:37376401-37385866	5	37376401	37385866	-30.8424	84.832	53.9895	81.4735	68.5532
Chr5:37392249-37402156	5	37392249	37402156	-37.8128	78.8764	41.0635	59.2301	48.9302
Chr5:37402655-37414275	5	37402655	37414275	-40.8951	79.6951	38.8	59.7445	50.0124
Chr5:37414375-37422750	5	37414375	37422750	-35.0014	88.5193	53.5179	72.1978	66.9339
Chr5:37659751-37671919	5	37659751	37671919	-29.9269	81.1987	51.2718	76.0992	47.183
Chr5:53115982-53125107	5	53115982	53125107	-38.7077	66.5567	27.849	61.5276	37.9226
Chr5:53125177-53133584	5	53125177	53133584	-39.8516	56.6599	16.8083	55.6999	35.0935
Chr5:53149190-53156642	5	53149190	53156642	-27.4719	39.8579	12.386	41.786	10.6971
Chr5:53164727-53172309	5	53164727	53172309	-43.7521	66.4462	22.6941	48.9705	22.115
Chr5:67262598-67271340	5	67262598	67271340	-30.9381	90.8103	59.8722	83.0887	59.925
Chr5:72367915-72377333	5	72367915	72377333	-34.3475	44.6645	10.3171	33.2143	4.27337
Chr5:72455538-72467355	5	72455538	72467355	-36.7927	58.4534	21.6607	50.866	5.78285
Chr5:76863770-76869346	5	76863770	76869346	-32.4314	72.9819	40.5504	56.3718	12.4288
Chr5:88178031-88199148	5	88178031	88199148	-35.8597	61.9312	26.0714	38.4723	10.8445
Chr5:92443906-92451685	5	92443906	92451685	-42.6525	72.1757	29.5232	53.9234	41.8676
Chr5:92451689-92460238	5	92451689	92460238	-33.3176	62.979	29.6615	38.0454	29.2595
Chr5:96438135-96447526	5	96438135	96447526	-33.6627	64.9476	31.2849	57.1465	22.3746
Chr5:96599959-96611807	5	96599959	96611807	-41.3404	61.5235	20.1832	45.8088	19.3516
Chr5:96612101-96623792	5	96612101	96623792	-31.7509	50.4824	18.7315	29.7513	10.1599
Chr5:96643248-96653290	5	96643248	96653290	-40.5967	75.6175	35.0208	52.2755	17.2954
Chr5:104089574-104096589	5	104089574	104096589	-22.4577	86.9049	64.4471	88.7222	45.5401
Chr5:107143810-107151866	5	107143810	107151866	-31.3885	67.4745	36.0859	62.4974	20.8908
Chr5:107183618-107192115	5	107183618	107192115	-41.8279	71.7095	29.8816	60.674	18.1532
Chr5:107207775-107217368	5	107207775	107217368	-34.7771	75.082	40.3049	72.9565	21.5849
Chr5:107234329-107244692	5	107234329	107244692	-28.2493	90.6495	62.4003	91.2129	44.7385
Chr5:108694288-108695069	5	108694288	108695069	-6.93332	8.61033	1.67701	5.47423	1.7153
Chr5:112284937-112291762	5	112284937	112291762	-22.0684	86.8273	64.7589	87.3493	34.7207
Chr5:117141419-117148642	5	117141419	117148642	-28.9161	86.8852	57.9691	77.0783	64.4682
Chr5:117658198-117663977	5	117658198	117663977	-27.0557	48.2556	21.1999	39.9543	1.92373
Chr5:118301517-118309470	5	118301517	118309470	-26.0098	84.5926	58.5828	69.6533	12.7593
Chr5:124049323-124055475	5	124049323	124055475	-36.9023	85.2001	48.2979	57.5347	24.6838
Chr5:125233670-125242312	5	125233670	125242312	-28.0728	65.747	37.6743	62.8874	14.0928
Chr5:125249183-125255355	5	125249183	125255355	-47.0463	75.2738	28.2275	66.7935	7.56996
Chr5:125255645-125262718	5	125255645	125262718	-35.8841	89.2076	53.3235	79.6019	18.8929
Chr5:125262812-125268822	5	125262812	125268822	-37.3395	57.372	20.0325	55.2465	3.6946
Chr5:125766316-125774881	5	125766316	125774881	-19.6424	87.9714	68.3289	79.0147	52.1387
Chr5:129167259-129178072	5	129167259	129178072	-41.9228	52.7046	10.7818	32.6582	6.39924
Chr5:134197629-134205854	5	134197629	134205854	-30.7022	81.1193	50.4171	64.3629	21.9396
Chr5:134933829-134941711	5	134933829	134941711	-28.4408	77.6795	49.2386	74.1589	43.061
Chr5:135969810-135976781	5	135969810	135976781	-31.2346	74.2117	42.977	65.9343	40.3441
Chr5:136661519-136671540	5	136661519	136671540	-47.8105	66.0144	18.2038	63.7216	11.4918
Chr5:137530663-137532378	5	137530663	137532378	-26.4907	30.01	3.51935	40.6201	1.44652
Chr5:139081108-139089515	5	139081108	139089515	-22.8776	78.2534	55.3758	48.725	36.3533
Chr5:139515575-139522099	5	139515575	139522099	-40.7918	61.6082	20.8164	48.9914	6.81214
Chr5:140658514-140665535	5	140658514	140665535	-27.7367	64.4424	36.7057	47.0247	19.8564
Chr5:146407242-146413398	5	146407242	146413398	-35.7581	73.7975	38.0393	69.0256	32.3664
Chr6:6117205-6125157	6	6117205	6125157	-36.0073	75.9334	39.926	80.9869	31.1188
Chr6:6125370-6135796	6	6125370	6135796	-32.4446	88.7816	56.337	90.0864	26.5069
Chr6:6135799-6145384	6	6135799	6145384	-33.4871	86.0567	52.5697	80.1327	29.1867
Chr6:6153067-6161977	6	6153067	6161977	-38.4296	87.0919	48.6623	83.0723	25.8088
Chr6:34359074-34368371	6	34359074	34368371	-42.7701	88.0619	45.2918	84.8777	89.834
Chr6:36915642-36929330	6	36915642	36929330	-36.8118	72.4941	35.6823	61.9976	48.2417
Chr6:36970164-36983232	6	36970164	36983232	-37.5232	70.8567	33.3335	65.3347	39.7156
Chr6:37016954-37029705	6	37016954	37029705	-35.7692	76.9998	41.2306	74.0885	52.5853
Chr6:37029716-37038848	6	37029716	37038848	-30.3918	56.1997	25.8079	45.8584	36.1729
Chr6:37154471-37167207	6	37154471	37167207	-37.5855	64.0214	26.4359	57.4558	24.5078
Chr6:37177890-37189139	6	37177890	37189139	-33.0809	63.9684	30.8875	66.9168	32.8887
Chr6:38311255-38319933	6	38311255	38319933	-43.3827	83.0308	39.6481	66.826	64.6048
Chr6:41938658-41970402	6	41938658	41970402	-35.1183	47.2779	12.1596	21.9265	8.11767
Chr6:42359041-42366096	6	42359041	42366096	-20.6278	78.526	57.8981	73.7585	49.1581
Chr6:56858639-56873272	6	56858639	56873272	-39.9032	78.3587	38.4554	55.1514	54.6053
Chr6:83219768-83230771	6	83219768	83230771	-33.5224	69.2592	35.7367	61.4688	15.8242
Chr6:83230820-83239078	6	83230820	83239078	-26.3542	41.8185	15.4644	31.2976	7.39999
Chr6:83456714-83461440	6	83456714	83461440	-35.5129	51.0003	15.4874	36.0179	1.28415
Chr6:83762143-83767873	6	83762143	83767873	-32.4207	56.9172	24.4965	46.1122	15.6724
Chr6:91640751-91649441	6	91640751	91649441	-31.326	64.7631	33.4372	41.7573	6.93964
Chr6:100204649-100212996	6	100204649	100212996	-31.0982	60.7707	29.6725	47.6361	6.71607
Chr6:113792805-113802331	6	113792805	113802331	-37.9689	73.7709	35.8021	62.9038	69.1872
Chr6:113802470-113813575	6	113802470	113813575	-19.047	89.0277	69.9806	86.0811	88.3635
Chr6:113813776-113823371	6	113813776	113823371	-37.2952	77.8247	40.5295	58.9234	69.1644
Chr6:113823374-113832496	6	113823374	113832496	-42.12	70.8764	28.7564	56.9863	53.8147
Chr6:113832593-113843500	6	113832593	113843500	-41.6251	68.6851	27.0599	53.1469	57.9105
Chr6:113843563-113859692	6	113843563	113859692	-39.2818	72.5841	33.3023	45.6524	50.4547
Chr6:121051647-121057676	6	121051647	121057676	-30.0126	88.2216	58.2089	91.7405	60.7514
Chr6:121057714-121064444	6	121057714	121064444	-32.3574	89.7234	57.366	88.3012	51.9706
Chr6:121064472-121070134	6	121064472	121070134	-30.7995	87.589	56.7895	87.0462	46.6324
Chr6:121093144-121099855	6	121093144	121099855	-20.6005	92.2943	71.6938	92.3026	70.2291
Chr6:121099861-121106757	6	121099861	121106757	-36.8785	69.603	32.7246	65.2117	18.9341
Chr6:124487939-124500431	6	124487939	124500431	-36.3715	61.5482	25.1766	42.2389	24.5412
Chr6:125649685-125657178	6	125649685	125657178	-36.8673	63.9395	27.0721	41.1344	90.2529
Chr6:127985686-127990900	6	127985686	127990900	-18.2907	90.5978	72.3071	91.3193	87.8445
Chr6:128000463-128007288	6	128000463	128007288	-29.1212	85.9931	56.8719	91.5167	56.5053
Chr6:128021933-128029339	6	128021933	128029339	-27.3801	81.8161	54.4361	71.2929	52.1451
Chr6:128029369-128034748	6	128029369	128034748	-44.0756	75.7876	31.7121	72.9327	23.213
Chr6:128034759-128038028	6	128034759	128038028	-46.0631	64.8043	18.7413	67.2927	17.7629
Chr6:128038060-128045473	6	128038060	128045473	-19.6944	84.2199	64.5255	84.1616	62.2111
Chr6:128045499-128053273	6	128045499	128053273	-35.1003	79.0224	43.9221	60.4258	38.0285
Chr6:128053439-128061566	6	128053439	128061566	-17.7501	87.5909	69.8408	87.629	81.347
Chr6:128061610-128067410	6	128061610	128067410	-23.7681	84.8169	61.0487	80.3724	71.0927
Chr6:128067485-128072967	6	128067485	128072967	-25.2297	89.0619	63.8322	87.5599	68.264
Chr6:128072985-128078449	6	128072985	128078449	-14.8718	93.0493	78.1775	89.1689	89.437
Chr6:128085106-128093117	6	128085106	128093117	-23.5158	91.5712	68.0553	92.1225	81.1232
Chr6:144009470-144022632	6	144009470	144022632	-44.5271	66.6012	22.074	41.8065	55.3681
Chr6:144033525-144041494	6	144033525	144041494	-34.5768	59.2077	24.6309	34.9611	51.2659
Chr6:144076819-144089300	6	144076819	144089300	-37.8319	51.0825	13.2506	28.2576	24.7942
Chr6:144139409-144146044	6	144139409	144146044	-38.6084	53.9965	15.3881	36.1378	45.6407
Chr6:144244909-144252542	6	144244909	144252542	-26.6126	42.1895	15.5769	38.5789	67.0316
Chr6:144406978-144414876	6	144406978	144414876	-42.013	56.0916	14.0786	41.4736	40.3056
Chr6:144414910-144424825	6	144414910	144424825	-39.9915	55.6496	15.6581	39.1514	53.8121
Chr6:144469296-144475928	6	144469296	144475928	-35.9686	54.4496	18.481	42.654	26.7781
Chr6:144520448-144531558	6	144520448	144531558	-37.8374	63.0487	25.2113	43.8396	65.8188
Chr6:144540905-144550229	6	144540905	144550229	-35.4907	54.1529	18.6622	44.9321	61.3315
Chr6:144620863-144633578	6	144620863	144633578	-34.5158	62.9954	28.4796	48.9888	73.8832
Chr6:144664954-144676480	6	144664954	144676480	-27.1992	55.8573	28.658	37.6139	70.5368
Chr7:19518727-19523042	7	19518727	19523042	-32.7437	50.052	17.3082	31.1565	15.4558
Chr7:19724220-19732275	7	19724220	19732275	-40.5176	87.8058	47.2882	90.3645	32.7783
Chr7:19732282-19738070	7	19732282	19738070	-60.3732	80.3222	19.9491	73.0043	7.97386
Chr7:19738087-19744355	7	19738087	19744355	-45.6395	66.7391	21.0996	53.8222	3.7413
Chr7:24614729-24620790	7	24614729	24620790	-47.1629	68.1749	21.012	50.5772	8.66089
Chr7:27502117-27507888	7	27502117	27507888	-37.0112	57.5234	20.5122	42.1358	15.8877
Chr7:30286087-30292713	7	30286087	30292713	-22.3927	39.2182	16.8255	35.5817	13.1346
Chr7:30292845-30297994	7	30292845	30297994	-35.9757	78.6635	42.6878	58.3464	11.8802
Chr7:30525040-30529896	7	30525040	30529896	-48.9068	70.4677	21.561	50.1272	5.10424
Chr7:30529951-30534751	7	30529951	30534751	-32.541	48.6115	16.0706	37.2587	3.5977
Chr7:39537679-39544955	7	39537679	39544955	-39.4505	59.5587	20.1082	53.4942	45.3376
Chr7:44595386-44601397	7	44595386	44601397	-32.0827	57.1927	25.1101	43.2152	21.968
Chr7:44616200-44622322	7	44616200	44622322	-37.5218	63.0008	25.479	45.6066	26.1858
Chr7:44627413-44632138	7	44627413	44632138	-35.7872	69.7132	33.926	46.6599	36.9776
Chr7:47040132-47050165	7	47040132	47050165	-38.3893	61.425	23.0358	46.9237	13.9407
Chr7:47225263-47242974	7	47225263	47242974	-25.308	91.877	66.569	80.6519	77.7353
Chr7:49383219-49393818	7	49383219	49393818	-24.9144	70.4095	45.4951	50.5564	43.9188
Chr7:57679524-57698640	7	57679524	57698640	-36.5226	65.5809	29.0583	54.4675	55.4178
Chr7:57698716-57715280	7	57698716	57715280	-32.6589	81.4996	48.8407	65.7823	86.041
Chr7:65638859-65645172	7	65638859	65645172	-40.6907	45.1269	4.43615	24.2194	40.7379
Chr7:65664026-65673621	7	65664026	65673621	-35.7758	82.843	47.0672	83.1418	91.649
Chr7:80052327-80058111	7	80052327	80058111	-24.3386	37.8094	13.4708	31.9051	15.6288
Chr7:80058136-80065094	7	80058136	80065094	-42.58	63.1624	20.5825	68.0429	37.8563
Chr7:80072214-80080255	7	80072214	80080255	-51.2259	69.5083	18.2825	63.0411	49.2931
Chr7:80080288-80084333	7	80080288	80084333	-34.8748	81.7675	46.8928	86.7125	87.1126
Chr7:80084411-80089714	7	80084411	80089714	-40.2914	82.567	42.2756	82.7268	90.0592
Chr7:81463866-81472437	7	81463866	81472437	-27.8393	60.9172	33.0779	55.736	53.06
Chr7:81695186-81701914	7	81695186	81701914	-15.0416	92.1031	77.0615	92.5541	71.0436
Chr7:90308063-90323594	7	90308063	90323594	-32.3733	62.5357	30.1624	57.8437	25.4408
Chr7:99813076-99817722	7	99813076	99817722	-46.052	83.0944	37.0424	84.37	20.1017
Chr7:99817804-99825812	7	99817804	99825812	-44.0237	61.3988	17.3751	58.3844	17.3923
Chr7:109227986-109240383	7	109227986	109240383	-29.5162	75.9907	46.4745	67.5986	41.3878
Chr7:109247243-109255921	7	109247243	109255921	-32.6995	53.0854	20.3859	29.9847	12.4566
Chr7:109614554-109625112	7	109614554	109625112	-22.0276	30.5158	8.48818	16.5478	23.77
Chr7:110245694-110257044	7	110245694	110257044	-29.2733	93.3281	64.0548	91.1019	78.7224
Chr7:110266389-110273834	7	110266389	110273834	-47.7994	79.3427	31.5433	67.2949	34.0758
Chr7:110273892-110280920	7	110273892	110280920	-33.5913	84.3995	50.8083	81.4958	59.6258
Chr7:118533317-118542093	7	118533317	118542093	-37.7214	62.2076	24.4862	52.3007	10.4617
Chr7:118542125-118550321	7	118542125	118550321	-35.326	84.6036	49.2776	78.3795	18.872
Chr7:118550340-118561146	7	118550340	118561146	-52.4765	83.9323	31.4558	75.8089	7.54848
Chr7:125406017-125418156	7	125406017	125418156	-35.6397	76.4774	40.8377	71.3628	85.8106
Chr7:125418233-125428395	7	125418233	125428395	-37.0757	59.9157	22.84	42.9074	54.4898
Chr7:125428454-125440699	7	125428454	125440699	-34.5049	46.9529	12.448	33.5988	38.2329
Chr7:126900939-126909595	7	126900939	126909595	-37.6615	76.1536	38.4921	63.9843	10.0673
Chr7:126909673-126922439	7	126909673	126922439	-32.1184	83.2069	51.0885	84.1525	35.7691
Chr7:127299600-127307276	7	127299600	127307276	-27.7421	87.1871	59.445	81.7046	85.6955
Chr7:127307286-127314315	7	127307286	127314315	-34.1574	83.5549	49.3975	73.0985	83.579
Chr7:127314359-127323825	7	127314359	127323825	-32.0013	77.7642	45.763	68.3917	68.094
Chr7:134584283-134598722	7	134584283	134598722	-30.8249	73.2233	42.3984	62.0266	15.2583
Chr7:144937627-144939517	7	144937627	144939517	-23.581	35.8286	12.2475	23.7182	2.19838
Chr7:145205515-145214929	7	145205515	145214929	-40.3803	70.59	30.2097	64.5904	43.881
Chr7:145215142-145226973	7	145215142	145226973	-30.8159	83.3112	52.4953	80.3656	70.6534
Chr8:3253287-3265082	8	3253287	3265082	-29.9567	82.2716	52.3148	65.1618	73.2634
Chr8:8803425-8809872	8	8803425	8809872	-31.2428	86.0453	54.8025	71.1493	63.3492
Chr8:11448135-11457660	8	11448135	11457660	-22.3304	81.6304	59.2999	71.2445	49.5318
Chr8:22746451-22754964	8	22746451	22754964	-44.2958	77.3308	33.035	63.8731	5.26677
Chr8:25090781-25099223	8	25090781	25099223	-30.754	82.7312	51.9771	70.2723	42.2562
Chr8:25518380-25519415	8	25518380	25519415	-24.3865	35.9991	11.6126	44.9246	3.31692
Chr8:27227561-27230073	8	27227561	27230073	-11.3254	16.2265	4.90103	25.2799	4.0465
Chr8:27230081-27242683	8	27230081	27242683	-40.7366	66.5033	25.7667	49.4586	27.0662
Chr8:31038945-31047845	8	31038945	31047845	-53.9991	69.5248	15.5257	52.7198	23.0684
Chr8:31047907-31060460	8	31047907	31060460	-37.7474	74.1829	36.4354	57.9577	34.2122
Chr8:33545616-33560396	8	33545616	33560396	-53.979	86.231	32.2519	75.0775	13.5946
Chr8:34107843-34112355	8	34107843	34112355	-11.4168	15.2749	3.85809	1.56538	0.1443
Chr8:47481323-47490886	8	47481323	47490886	-28.5272	80.875	52.3477	70.5807	23.6973
Chr8:48230797-48235816	8	48230797	48235816	-30.0453	47.5615	17.5162	27.7508	39.0311
Chr8:48315798-48323098	8	48315798	48323098	-32.4306	50.9858	18.5552	56.6817	47.6241
Chr8:70158216-70163773	8	70158216	70163773	-38.3239	67.0943	28.7704	57.1893	13.3657
Chr8:70163845-70167287	8	70163845	70167287	-34.2397	82.3963	48.1566	76.1134	31.1217
Chr8:70527857-70532685	8	70527857	70532685	-19.0406	71.9205	52.8799	61.8322	59.6003
Chr8:83607112-83608571	8	83607112	83608571	-5.26743	5.84365	0.576222	2.5843	0.343643
Chr8:83662082-83668033	8	83662082	83668033	-26.1759	41.0466	14.8707	25.5216	8.31227
Chr8:83673497-83680758	8	83673497	83680758	-38.7306	76.2519	37.5213	53.6445	32.938
Chr8:84723692-84730142	8	84723692	84730142	-30.0939	81.213	51.1191	82.2436	36.1622
Chr8:84730153-84737666	8	84730153	84737666	-36.1633	59.9874	23.8242	41.0576	6.22262
Chr8:84749909-84757040	8	84749909	84757040	-28.2649	81.2317	52.9667	72.5137	21.7054
Chr8:84757363-84764898	8	84757363	84764898	-28.2361	86.9292	58.6931	85.6318	27.2362
Chr8:84770792-84774813	8	84770792	84774813	-30.8427	38.7359	7.89318	24.8462	10.1954
Chr8:90848267-90857554	8	90848267	90857554	-30.7234	85.3899	54.6664	81.8697	47.1193
Chr8:90869029-90876492	8	90869029	90876492	-34.0082	77.4401	43.4319	80.3421	28.4235
Chr8:105356141-105361675	8	105356141	105361675	-54.2755	80.8144	26.5389	69.9417	55.9006
Chr8:105361721-105368175	8	105361721	105368175	-36.1383	83.9564	47.8181	75.2535	65.8303
Chr8:106170039-106184422	8	106170039	106184422	-28.9554	85.6847	56.7293	72.1124	33.0915
Chr8:106260786-106265869	8	106260786	106265869	-23.8385	89.9148	66.0763	71.7319	91.1947
Chr8:106265905-106274217	8	106265905	106274217	-27.2563	82.9142	55.6578	60.2499	93.3597
Chr8:110042221-110052254	8	110042221	110052254	-34.157	74.2251	40.0681	59.3434	32.3477
Chr8:120743349-120749562	8	120743349	120749562	-34.205	87.1787	52.9738	85.7659	58.2875
Chr8:124651573-124657225	8	124651573	124657225	-30.6143	77.2205	46.6062	73.4744	25.2859
Chr8:124657576-124663006	8	124657576	124663006	-13.5545	21.7299	8.17541	30.5089	4.21321
Chr9:21186653-21192647	9	21186653	21192647	-32.3155	53.6413	21.3257	53.5564	8.50801
Chr9:21192652-21201773	9	21192652	21201773	-35.7088	70.9463	35.2375	57.8366	12.2819
Chr9:21232539-21237106	9	21232539	21237106	-35.5098	78.9934	43.4836	78.0204	13.8384
Chr9:21816339-21821617	9	21816339	21821617	-32.3708	94.4742	62.1034	93.7501	54.2086
Chr9:21821671-21828688	9	21821671	21828688	-51.1951	82.0251	30.83	74.0896	11.173
Chr9:21828830-21832921	9	21828830	21832921	-44.367	89.5884	45.2214	89.842	25.2842
Chr9:21833050-21838782	9	21833050	21838782	-52.0152	71.8817	19.8666	60.213	12.9813
Chr9:27332411-27336014	9	27332411	27336014	-19.5536	94.8227	75.2691	95.3748	90.9878
Chr9:27421697-27432457	9	27421697	27432457	-44.1521	76.4484	32.2963	54.4924	73.1902
Chr9:27485709-27504960	9	27485709	27504960	-35.2767	53.8958	18.6191	34.561	42.0783
Chr9:42520879-42530567	9	42520879	42530567	-41.7434	73.5541	31.8107	61.891	12.5578
Chr9:42568465-42576708	9	42568465	42576708	-33.3319	46.7299	13.3981	29.8223	8.96605
Chr9:42576865-42584626	9	42576865	42584626	-27.39	65.531	38.141	51.7504	14.0698
Chr9:42584629-42594398	9	42584629	42594398	-25.7256	82.5609	56.8353	72.5543	31.978
Chr9:42614207-42621497	9	42614207	42621497	-39.7818	72.0399	32.2581	54.2187	19.2915
Chr9:42656798-42664925	9	42656798	42664925	-28.9194	52.4913	23.5719	44.2962	11.2673
Chr9:42707231-42717845	9	42707231	42717845	-28.2307	44.7125	16.4818	21.9363	8.33627
Chr9:43127299-43136104	9	43127299	43136104	-29.6282	78.3641	48.7359	68.5303	28.6596
Chr9:61020151-61027513	9	61020151	61027513	-28.884	80.6282	51.7443	69.1172	66.0819
Chr9:62410211-62416824	9	62410211	62416824	-31.8501	72.4836	40.6335	76.3158	22.4242
Chr9:64504756-64510543	9	64504756	64510543	-35.8692	74.7882	38.919	46.0829	17.5104
Chr9:64557639-64568443	9	64557639	64568443	-32.9517	66.713	33.7614	41.0549	29.3304
Chr9:65277776-65284690	9	65277776	65284690	-34.1816	50.3017	16.1201	34.1705	5.83864
Chr9:66168438-66180359	9	66168438	66180359	-47.8273	80.6128	32.7855	81.5885	37.0021
Chr9:66180416-66191346	9	66180416	66191346	-46.7044	69.0932	22.3888	70.5981	19.2644
Chr9:66191364-66202739	9	66191364	66202739	-48.8352	72.2912	23.456	60.0282	18.371
Chr9:66202809-66214406	9	66202809	66214406	-35.3279	53.7488	18.4209	58.7624	16.8907
Chr9:66234953-66247286	9	66234953	66247286	-39.3605	58.3649	19.0044	46.2274	11.3037
Chr9:84046585-84054874	9	84046585	84054874	-29.4265	88.0154	58.5889	82.7369	61.0458
Chr9:107295437-107299632	9	107295437	107299632	-8.47364	10.5624	2.08874	11.4334	4.97748
Chr9:107299653-107304959	9	107299653	107304959	-35.1255	80.0859	44.9604	67.4309	49.5359
Chr9:107936055-107942398	9	107936055	107942398	-20.7135	31.6059	10.8925	33.3759	29.7106
Chr9:108401583-108411852	9	108401583	108411852	-31.2779	75.3124	44.0345	68.7845	22.1403
Chr9:109009257-109015319	9	109009257	109015319	-43.0862	61.9008	18.8145	45.2487	29.2811
Chr9:109015338-109025179	9	109015338	109025179	-40.444	75.868	35.424	57.9733	51.9271
Chr9:109025220-109033772	9	109025220	109033772	-36.8422	66.0567	29.2145	49	36.2319
Chr9:110627062-110630082	9	110627062	110630082	-41.4475	92.6261	51.1787	91.9343	20.5133
Chr9:110630091-110633186	9	110630091	110633186	-40.1876	84.7384	44.5508	82.3144	12.3848
Chr9:110633260-110636659	9	110633260	110636659	-34.157	82.7768	48.6198	77.8653	24.8172
Chr9:110636684-110640473	9	110636684	110640473	-24.5236	89.3584	64.8348	93.859	22.3089
Chr9:110998762-111005870	9	110998762	111005870	-26.275	36.9143	10.6394	25.2265	5.10401
Chr9:114449376-114455365	9	114449376	114455365	-35.8366	87.4568	51.6202	85.7294	28.8837
Chr9:114461709-114467215	9	114461709	114467215	-28.628	88.2836	59.6556	89.259	33.6891
Chr9:114467289-114475169	9	114467289	114475169	-36.6579	70.7936	34.1357	47.5605	15.185
Chr9:114855380-114862669	9	114855380	114862669	-46.3381	58.7353	12.3971	32.3461	3.19883
Chr9:119042481-119049418	9	119042481	119049418	-31.6141	62.2093	30.5951	45.319	11.025
Chr9:122643928-122655794	9	122643928	122655794	-30.4057	61.6795	31.2738	57.5264	26.9712
Chr9:122655803-122664459	9	122655803	122664459	-40.8616	85.0437	44.1821	80.5583	48.2362
Chr9:122736333-122747344	9	122736333	122747344	-30.6995	55.0529	24.3534	33.7266	38.4524
Chr10:3755639-3772657	10	3755639	3772657	-23.4607	92.1982	68.7375	93.4722	76.6694
Chr10:3839637-3850705	10	3839637	3850705	-33.6473	84.1618	50.5145	83.5082	60.4238
Chr10:7862350-7867519	10	7862350	7867519	-27.3829	52.7008	25.3179	45.7373	6.75556
Chr10:13967743-13975486	10	13967743	13975486	-41.6354	69.8711	28.2357	79.4865	78.1649
Chr10:13983114-13993400	10	13983114	13993400	-39.1291	71.26	32.1309	65.2692	74.7878
Chr10:14085359-14095534	10	14085359	14095534	-18.2584	94.6224	76.364	89.2519	93.6057
Chr10:26329860-26338707	10	26329860	26338707	-42.8327	50.8799	8.04725	20.9211	12.1478
Chr10:41922185-41929070	10	41922185	41929070	-30.7737	83.1371	52.3633	74.3311	52.9233
Chr10:58618175-58626563	10	58618175	58626563	-27.4033	73.3673	45.964	60.4216	49.4243
Chr10:61533166-61540927	10	61533166	61540927	-32.6407	77.7745	45.1337	82.235	41.1001
Chr10:61742503-61748754	10	61742503	61748754	-33.4988	77.7796	44.2809	66.6212	19.7004
Chr10:61748764-61753320	10	61748764	61753320	-43.8811	64.4497	20.5686	42.8594	3.0271
Chr10:63680583-63690762	10	63680583	63690762	-28.9358	86.7228	57.787	72.4585	62.8575
Chr10:63823356-63836381	10	63823356	63836381	-42.361	74.6501	32.2891	59.782	30.7903
Chr10:63849337-63860408	10	63849337	63860408	-44.0463	82.3005	38.2542	64.7189	48.3122
Chr10:63861031-63872336	10	63861031	63872336	-45.3404	61.9716	16.6313	42.4901	13.3496
Chr10:63872648-63886534	10	63872648	63886534	-34.2769	62.3597	28.0829	43.7693	24.8351
Chr10:63911159-63925261	10	63911159	63925261	-38.6398	77.9769	39.3371	48.7983	27.2209
Chr10:69461280-69471761	10	69461280	69471761	-35.2093	72.7092	37.4999	63.7683	20.7861
Chr10:69502057-69513432	10	69502057	69513432	-36.8561	62.7723	25.9162	48.1673	8.30911
Chr10:69513461-69522318	10	69513461	69522318	-42.2313	73.8698	31.6385	54.6365	13.133
Chr10:71266712-71275412	10	71266712	71275412	-21.6092	45.0666	23.4575	34.2426	19.7782
Chr10:74998878-75005669	10	74998878	75005669	-15.1347	91.6799	76.5452	87.4014	59.4733
Chr10:78625159-78635267	10	78625159	78635267	-43.9584	85.2475	41.2891	88.6148	81.4701
Chr10:79997321-80001662	10	79997321	80001662	-23.0539	71.0579	48.0041	78.9595	34.3873
Chr10:80312983-80315246	10	80312983	80315246	-31.282	60.8449	29.563	38.8189	16.7318
Chr10:80333818-80336833	10	80333818	80336833	-35.1194	80.1628	45.0434	67.1206	19.7755
Chr10:83095750-83102935	10	83095750	83102935	-32.7841	68.2569	35.4727	51.5935	46.7685
Chr10:83102970-83109860	10	83102970	83109860	-29.9604	74.6727	44.7122	71.3274	71.3383
Chr10:83117961-83125888	10	83117961	83125888	-26.6897	79.4856	52.7959	78.2698	80.0223
Chr10:83147170-83154722	10	83147170	83154722	-27.7176	71.9316	44.214	69.4334	67.7772
Chr10:83177885-83185972	10	83177885	83185972	-36.0939	81.4068	45.3129	72.4579	68.9176
Chr10:83186003-83191674	10	83186003	83191674	-25.9446	85.127	59.1824	77.2963	71.9045
Chr10:84585423-84595566	10	84585423	84595566	-32.3508	89.007	56.6561	85.2426	68.1693
Chr10:84595596-84606303	10	84595596	84606303	-48.5651	87.3524	38.7873	79.4131	41.6564
Chr10:94169139-94177729	10	94169139	94177729	-25.9368	91.7652	65.8284	93.4117	60.5785
Chr10:94957134-94962983	10	94957134	94962983	-28.899	67.7747	38.8756	50.7773	31.4043
Chr10:95415900-95416949	10	95415900	95416949	-12.6885	15.5204	2.83189	8.60301	1.56481
Chr10:95594853-95602104	10	95594853	95602104	-40.8951	73.824	32.9288	61.7282	34.9077
Chr10:95602484-95610548	10	95602484	95610548	-42.2372	86.0942	43.857	74.8414	77.9549
Chr10:95610564-95616947	10	95610564	95616947	-47.293	80.6717	33.3787	77.6356	77.626
Chr10:95626206-95634168	10	95626206	95634168	-38.0088	67.8168	29.808	60.5812	39.6351
Chr10:105274145-105287359	10	105274145	105287359	-38.9818	71.388	32.4062	69.0012	32.226
Chr10:105402894-105414269	10	105402894	105414269	-28.2214	91.9576	63.7362	89.0402	79.6257
Chr10:105555318-105567062	10	105555318	105567062	-26.0964	92.5446	66.4482	85.0646	90.6805
Chr10:107761538-107778071	10	107761538	107778071	-44.2404	69.646	25.4056	49.9524	16.7756
Chr11:4035788-4044451	11	4035788	4044451	-51.7239	77.0945	25.3706	67.2029	16.4445
Chr11:24747192-24764702	11	24747192	24764702	-28.7644	82.8781	54.1136	67.1158	55.8821
Chr11:43601450-43611510	11	43601450	43611510	-30.3266	77.0418	46.7152	66.0248	14.6455
Chr11:45541737-45552576	11	45541737	45552576	-31.8709	50.0727	18.2018	30.5324	4.24036
Chr11:54337820-54346616	11	54337820	54346616	-36.3308	68.7137	32.3829	39.6775	64.8666
Chr11:55205122-55214995	11	55205122	55214995	-29.4385	58.3025	28.864	51.0134	14.8784
Chr11:60934420-60943047	11	60934420	60943047	-37.2202	82.8448	45.6246	81.4907	35.007
Chr11:60943156-60951216	11	60943156	60951216	-17.7371	95.3528	77.6157	93.4906	51.1313
Chr11:69849808-69854634	11	69849808	69854634	-43.0496	61.6178	18.5682	46.4144	57.3519
Chr11:72454326-72461914	11	72454326	72461914	-41.2463	64.3348	23.0885	43.4619	12.4657
Chr11:72552599-72564500	11	72552599	72564500	-27.7965	88.2028	60.4063	85.1121	35.4323
Chr11:75445373-75450886	11	75445373	75450886	-41.6291	67.9639	26.3348	55.4217	8.48014
Chr11:75775040-75784057	11	75775040	75784057	-32.6661	72.3009	39.6348	57.4314	28.47
Chr11:76019957-76027132	11	76019957	76027132	-34.2273	56.8922	22.6648	39.7147	13.6225
Chr11:76328874-76337081	11	76328874	76337081	-36.6102	66.6741	30.064	52.6014	26.3944
Chr11:76567914-76571690	11	76567914	76571690	-27.7978	47.3076	19.5098	52.3432	19.8897
Chr11:78826087-78830152	11	78826087	78830152	-8.62824	13.5812	4.95293	22.4332	1.86367
Chr11:78830266-78837132	11	78830266	78837132	-57.5324	73.4565	15.9242	70.1891	7.55367
Chr11:78837174-78843545	11	78837174	78843545	-40.2814	80.6491	40.3677	81.1652	18.304
Chr11:83850906-83852938	11	83850906	83852938	-24.5645	28.3713	3.80686	14.8756	0.68306
Chr11:88177337-88183590	11	88177337	88183590	-29.7668	55.007	25.2402	40.6916	23.1937
Chr11:88183688-88190621	11	88183688	88190621	-40.0541	65.6946	25.6404	55.8403	24.521
Chr11:88190649-88194783	11	88190649	88194783	-18.5114	27.3136	8.80218	20.0579	10.855
Chr11:88357825-88363972	11	88357825	88363972	-38.9277	77.6876	38.7599	61.1269	18.3112
Chr11:88473633-88482653	11	88473633	88482653	-35.4251	64.015	28.5898	50.9647	11.2785
Chr11:88554391-88562526	11	88554391	88562526	-38.8569	62.8059	23.9489	54.9253	11.4338
Chr11:88562734-88571457	11	88562734	88571457	-34.2095	69.5919	35.3824	65.333	14.8856
Chr11:88571619-88578252	11	88571619	88578252	-34.9278	59.4872	24.5594	41.103	10.0816
Chr11:88614783-88621588	11	88614783	88621588	-31.2433	49.7551	18.5119	41.1714	4.63959
Chr11:88621716-88627611	11	88621716	88627611	-27.9641	68.6625	40.6985	68.9368	13.046
Chr11:88645818-88653627	11	88645818	88653627	-26.9711	80.2713	53.3002	71.4016	32.3039
Chr11:97687541-97693928	11	97687541	97693928	-27.7436	56.3933	28.6497	48.4923	14.4801
Chr11:104613852-104622964	11	104613852	104622964	-32.07	73.7631	41.6931	74.1351	21.4897
Chr11:104632990-104641088	11	104632990	104641088	-17.8359	89.7751	71.9392	89.4625	49.8752
Chr11:107599759-107607188	11	107599759	107607188	-41.6635	67.5881	25.9246	55.6342	13.1079
Chr11:107701356-107707820	11	107701356	107707820	-38.948	72.1176	33.1696	74.5512	91.854
Chr11:107707872-107714189	11	107707872	107714189	-43.5511	75.1911	31.64	61.5133	87.4883
Chr11:107714227-107720830	11	107714227	107720830	-47.7463	67.5471	19.8007	57.9323	88.1982
Chr11:107720840-107728931	11	107720840	107728931	-38.2946	62.9135	24.6188	44.6137	81.4613
Chr11:107735301-107740421	11	107735301	107740421	-29.8277	76.503	46.6753	66.6567	54.1999
Chr11:108983280-108992613	11	108983280	108992613	-38.4392	73.588	35.1488	60.4347	50.6622
Chr11:109289633-109297421	11	109289633	109297421	-40.6746	84.9805	44.3059	70.6278	33.1807
Chr11:110309405-110322528	11	110309405	110322528	-30.0654	82.1684	52.103	85.1872	65.1751
Chr11:110505715-110513604	11	110505715	110513604	-42.7905	74.5976	31.8071	63.1911	47.1149
Chr11:113511765-113518227	11	113511765	113518227	-23.1744	42.9773	19.8028	20.8314	6.4905
Chr11:113553116-113558759	11	113553116	113558759	-32.0335	75.7758	43.7423	73.7107	34.2991
Chr11:114702705-114710559	11	114702705	114710559	-36.9885	62.6767	25.6882	56.9551	29.3502
Chr11:116453249-116458387	11	116453249	116458387	-14.4943	91.1217	76.6274	86.967	74.7438
Chr11:119081255-119084099	11	119081255	119084099	-29.3798	61.1047	31.7249	46.6837	7.78173
Chr11:120810771-120814003	11	120810771	120814003	-29.9397	74.6571	44.7174	48.0495	4.14413
Chr12:4071271-4082222	12	4071271	4082222	-36.7068	70.2219	33.5151	59.5598	3.47991
Chr12:11149998-11152629	12	11149998	11152629	-9.73167	13.0229	3.29126	4.91084	6.44667
Chr12:33241672-33248312	12	33241672	33248312	-48.871	72.976	24.1049	60.7656	20.7868
Chr12:33323574-33330231	12	33323574	33330231	-27.4279	44.7737	17.3458	33.1458	7.16395
Chr12:36117067-36130043	12	36117067	36130043	-38.4475	63.3149	24.8674	33.513	16.4404
Chr12:53179514-53189499	12	53179514	53189499	-23.3494	27.6475	4.29808	2.56031	1.77875
Chr12:56270030-56280540	12	56270030	56280540	-32.5046	50.9479	18.4433	42.8998	15.9311
Chr12:69542663-69547855	12	69542663	69547855	-36.1682	84.2111	48.0429	53.6997	14.3317
Chr12:70179686-70187086	12	70179686	70187086	-28.6037	87.5362	58.9325	75.6709	78.6179
Chr12:70833542-70843776	12	70833542	70843776	-51.8484	81.5991	29.7507	76.3725	36.4199
Chr12:70855185-70863541	12	70855185	70863541	-27.2858	84.8431	57.5573	87.5477	70.2859
Chr12:73112969-73120389	12	73112969	73120389	-10.6005	11.1213	0.520833	2.72417	7.07921
Chr12:76869228-76876174	12	76869228	76876174	-22.7428	80.6822	57.9394	70.1542	23.2726
Chr12:78959420-78968745	12	78959420	78968745	-32.2561	90.7551	58.499	83.0979	68.3524
Chr12:79741215-79750280	12	79741215	79750280	-32.2017	53.769	21.5673	39.6531	22.3338
Chr12:79782307-79790843	12	79782307	79790843	-41.276	78.5971	37.3212	79.1548	34.295
Chr12:83523676-83529237	12	83523676	83529237	-22.8217	90.3538	67.5321	80.9741	37.3657
Chr12:84151665-84156511	12	84151665	84156511	-17.6172	88.9305	71.3132	90.613	85.3951
Chr12:88764650-88786829	12	88764650	88786829	-35.9834	63.5059	27.5225	57.2504	57.9692
Chr12:101702427-101718059	12	101702427	101718059	-19.9437	93.5026	73.5589	78.0479	66.5094
Chr12:101944115-101953620	12	101944115	101953620	-22.0587	93.938	71.8792	89.4838	72.0355
Chr12:118197810-118206782	12	118197810	118206782	-16.7502	22.9298	6.17961	20.5827	2.23896
Chr13:12439229-12448462	13	12439229	12448462	-33.1332	89.4911	56.3579	85.3397	46.2981
Chr13:12448665-12457074	13	12448665	12457074	-40.6629	64.536	23.8731	40.5403	6.0769
Chr13:20367559-20379414	13	20367559	20379414	-27.5055	78.0228	50.5173	70.3639	29.7232
Chr13:20391867-20407104	13	20391867	20407104	-23.8141	90.119	66.3049	89.3293	46.2349
Chr13:21418658-21434332	13	21418658	21434332	-42.51	76.8878	34.3778	82.473	44.568
Chr13:34045184-34054782	13	34045184	34054782	-35.9062	70.1371	34.2309	52.1843	14.1703
Chr13:34525103-34538213	13	34525103	34538213	-40.877	58.9209	18.0439	50.6266	40.7975
Chr13:34975986-34985589	13	34975986	34985589	-45.823	82.0796	36.2566	71.0774	34.3512
Chr13:53427905-53435856	13	53427905	53435856	-31.9354	54.3385	22.4031	27.0999	11.8972
Chr13:54202242-54209230	13	54202242	54209230	-46.6117	75.863	29.2513	70.6322	95.6439
Chr13:54228671-54239376	13	54228671	54239376	-28.919	46.3441	17.4251	49.2199	56.5091
Chr13:54248828-54255947	13	54248828	54255947	-28.3299	45.0065	16.6766	36.1921	54.8116
Chr13:54256013-54263367	13	54256013	54263367	-41.8223	56.5062	14.684	49.1058	80.2942
Chr13:54263368-54272373	13	54263368	54272373	-34.6398	59.5326	24.8928	56.1599	82.7592
Chr13:55386289-55395584	13	55386289	55395584	-28.257	52.1016	23.8446	36.6819	8.05657
Chr13:58068745-58074676	13	58068745	58074676	-20.824	89.0208	68.1969	80.3409	51.2803
Chr13:58596669-58603515	13	58596669	58603515	-31.9805	68.0346	36.0541	44.871	26.1691
Chr13:84475890-84489539	13	84475890	84489539	-50.9452	77.488	26.5428	58.955	20.1256
Chr13:92629314-92639453	13	92629314	92639453	-51.7518	83.1186	31.3668	81.7478	32.6915
Chr13:92639474-92649152	13	92639474	92649152	-41.6049	75.7771	34.1722	71.766	24.912
Chr13:92649185-92661079	13	92649185	92661079	-47.8025	89.9463	42.1437	87.2282	38.9503
Chr13:92672653-92681874	13	92672653	92681874	-43.227	77.9054	34.6784	82.5962	27.1882
Chr13:92682014-92693809	13	92682014	92693809	-35.2334	82.5624	47.329	72.0482	30.0558
Chr13:93981176-93991460	13	93981176	93991460	-34.0943	60.8949	26.8006	39.7263	8.17469
Chr13:99540370-99546793	13	99540370	99546793	-27.6338	49.7776	22.1438	50.91	58.1127
Chr13:108357486-108366846	13	108357486	108366846	-31.6989	92.0991	60.4003	88.6993	72.2238
Chr14:5001145-5009325	14	5001145	5009325	-12.6524	12.6524	0	7.14275	1.96078
Chr14:8251538-8262892	14	8251538	8262892	-30.2286	55.3454	25.1168	51.9713	17.8034
Chr14:8349165-8357752	14	8349165	8357752	-44.5835	83.5741	38.9905	67.0881	82.7961
Chr14:8357776-8369791	14	8357776	8369791	-49.4624	83.7524	34.29	80.9557	86.6405
Chr14:10942358-10960971	14	10942358	10960971	-23.3706	84.3736	61.003	74.1611	48.2619
Chr14:21985716-21987320	14	21985716	21987320	-33.2359	48.5167	15.2808	24.9432	2.63533
Chr14:25866894-25874613	14	25866894	25874613	-44.1672	70.6594	26.4922	68.2348	29.7437
Chr14:27363400-27373063	14	27363400	27373063	-52.8325	70.019	17.1865	82.869	50.4078
Chr14:27373158-27381637	14	27373158	27381637	-51.0182	76.4812	25.463	62.7604	20.676
Chr14:34826671-34835181	14	34826671	34835181	-30.3042	84.702	54.3978	83.0316	32.9796
Chr14:34835230-34844537	14	34835230	34844537	-31.4442	81.9848	50.5406	71.4934	37.0425
Chr14:34893257-34900258	14	34893257	34900258	-32.75	46.9108	14.1609	41.5447	15.957
Chr14:34910774-34919945	14	34910774	34919945	-32.832	56.9042	24.0722	43.0404	13.9215
Chr14:34971819-34984827	14	34971819	34984827	-22.8326	92.5746	69.742	80.686	89.1629
Chr14:34985634-35001610	14	34985634	35001610	-31.3251	86.7435	55.4185	81.4464	82.3854
Chr14:35045009-35059626	14	35045009	35059626	-31.5119	85.7748	54.2629	77.2325	75.8647
Chr14:35059641-35076358	14	35059641	35076358	-39.0787	74.9345	35.8558	58.7951	61.7758
Chr14:35076698-35089191	14	35076698	35089191	-25.732	91.4459	65.7138	83.8328	83.5328
Chr14:46849746-46862475	14	46849746	46862475	-23.5755	82.2	58.6245	86.124	61.0287
Chr14:48178743-48187442	14	48178743	48187442	-25.4308	41.1705	15.7397	15.2702	3.69468
Chr14:55081953-55090876	14	55081953	55090876	-29.6009	80.0621	50.4612	78.8018	38.1541
Chr14:60675067-60683441	14	60675067	60683441	-34.3546	56.5099	22.1553	63.7858	30.8731
Chr14:60752621-60759421	14	60752621	60759421	-26.4534	86.3067	59.8533	75.8919	53.1818
Chr14:60759449-60765927	14	60759449	60765927	-34.1792	71.7232	37.544	64.9223	43.2094
Chr14:67897371-67907957	14	67897371	67907957	-21.9619	90.0411	68.0792	90.4703	50.2779
Chr14:67908258-67918791	14	67908258	67918791	-16.8633	91.9035	75.0403	88.8916	63.1817
Chr14:69245953-69252862	14	69245953	69252862	-35.6506	85.2156	49.565	74.4991	33.172
Chr14:70587681-70596160	14	70587681	70596160	-36.4893	82.3377	45.8484	71.0432	28.1336
Chr14:118563614-118569472	14	118563614	118569472	-30.1611	54.7996	24.6384	34.4781	9.27629
Chr15:12559439-12566391	15	12559439	12566391	-33.8756	82.5388	48.6632	72.3616	34.8489
Chr15:12605125-12614281	15	12605125	12614281	-27.9362	83.8545	55.9183	78.8111	42.7028
Chr15:12614295-12619943	15	12614295	12619943	-12.7005	93.6264	80.9259	96.1774	75.5507
Chr15:27922368-27927148	15	27922368	27927148	-30.3856	42.4522	12.0666	28.4934	3.82942
Chr15:27934618-27941381	15	27934618	27941381	-25.4207	62.3648	36.9441	44.1871	25.8953
Chr15:27995106-28003590	15	27995106	28003590	-30.1004	73.0521	42.9517	58.6441	23.9379
Chr15:28222348-28234400	15	28222348	28234400	-29.2546	88.5878	59.3331	56.3846	59.3738
Chr15:42116449-42136920	15	42116449	42136920	-31.6474	78.9183	47.2709	67.6426	67.2727
Chr15:56876634-56886101	15	56876634	56886101	-29.6081	44.6149	15.0067	11.2896	12.6984
Chr15:58537494-58549456	15	58537494	58549456	-33.6835	51.1728	17.4894	28.3832	5.87302
Chr15:58562528-58575097	15	58562528	58575097	-43.6024	57.1159	13.5134	21.4215	6.64983
Chr15:58612286-58619406	15	58612286	58619406	-49.3953	64.2329	14.8375	23.8081	9.51101
Chr15:58619651-58632259	15	58619651	58632259	-47.7724	64.6046	16.8321	36.4371	9.19935
Chr15:58632263-58642954	15	58632263	58642954	-42.5534	53.3769	10.8235	20.5435	4.42055
Chr15:58643404-58652163	15	58643404	58652163	-38.4267	50.9993	12.5726	22.9904	6.03825
Chr15:58652251-58662963	15	58652251	58662963	-36.2737	48.5839	12.3101	20.3152	5.10088
Chr15:59315986-59322894	15	59315986	59322894	-29.6422	60.9531	31.311	37.0203	23.5097
Chr15:59699450-59710651	15	59699450	59710651	-36.1067	64.4847	28.378	58.2769	59.1975
Chr15:59723721-59730380	15	59723721	59730380	-48.087	73.6256	25.5386	65.7051	67.1814
Chr15:59730399-59741070	15	59730399	59741070	-53.1534	79.4231	26.2696	61.2365	82.0111
Chr15:59741092-59749777	15	59741092	59749777	-46.906	59.6603	12.7543	50.7743	51.4694
Chr15:59749778-59760946	15	59749778	59760946	-34.5358	52.9642	18.4284	36.5472	50.5681
Chr15:76166851-76172829	15	76166851	76172829	-37.1345	69.0138	31.8793	45.3191	24.583
Chr15:76172859-76174753	15	76172859	76174753	-59.9049	84.7193	24.8144	61.6432	13.5241
Chr15:76174763-76176865	15	76174763	76176865	-66.4166	89.858	23.4414	64.6941	17.0258
Chr15:76176867-76178658	15	76176867	76178658	-58.9368	89.0403	30.1035	85.4003	34.0686
Chr15:76178675-76180066	15	76178675	76180066	-59.046	90.2384	31.1925	79.622	22.3197
Chr15:76180079-76181452	15	76180079	76181452	-64.8816	76.9444	12.0628	74.0241	12.981
Chr15:76181475-76183753	15	76181475	76183753	-61.1373	82.3063	21.169	68.8657	11.6977
Chr15:76183765-76187710	15	76183765	76187710	-51.7139	89.4912	37.7773	83.7217	41.9691
Chr15:76187739-76191591	15	76187739	76191591	-42.5962	92.6049	50.0088	90.3336	61.7214
Chr15:76191598-76197695	15	76191598	76197695	-53.844	83.4163	29.5723	78.5048	39.3826
Chr15:76200494-76205892	15	76200494	76205892	-50.2293	73.7792	23.55	67.5109	23.9976
Chr15:76205910-76210755	15	76205910	76210755	-38.7258	55.5802	16.8544	53.8584	21.9373
Chr15:76210784-76220354	15	76210784	76220354	-30.719	64.0686	33.3496	51.949	15.5437
Chr15:79617775-79624057	15	79617775	79624057	-38.9069	87.0676	48.1606	84.4926	12.4141
Chr15:79624104-79631739	15	79624104	79631739	-28.5681	87.7195	59.1514	80.9506	24.7047
Chr15:79640480-79647743	15	79640480	79647743	-23.1779	91.572	68.3941	87.1098	24.7141
Chr15:80012951-80014334	15	80012951	80014334	-30.9598	44.2723	13.3125	26.0092	0.510204
Chr15:83736046-83746275	15	83736046	83746275	-29.3844	47.3865	18.0021	31.2984	45.3845
Chr15:98670140-98675710	15	98670140	98675710	-52.7776	73.997	21.2194	59.8109	16.1026
Chr15:100577269-100581082	15	100577269	100581082	-38.8336	69.3037	30.4701	56.0041	3.1521
Chr15:101061341-101068978	15	101061341	101068978	-46.0548	60.3073	14.2525	36.1206	12.352
Chr15:101069184-101076782	15	101069184	101076782	-40.3443	51.5123	11.168	35.2673	10.336
Chr15:103027435-103034240	15	103027435	103034240	-23.0192	32.3158	9.29664	25.5374	3.51428
Chr16:13723591-13733973	16	13723591	13733973	-42.8613	69.0626	26.2013	68.3013	54.1747
Chr16:13733986-13745918	16	13733986	13745918	-40.5721	67.404	26.8319	62.6911	59.6226
Chr16:20716334-20718001	16	20716334	20718001	-6.65297	7.34576	0.69279	7.04616	7.05446
Chr16:30064425-30066643	16	30064425	30066643	-4.42642	4.42642	0	0.301205	1.33566
Chr16:31157970-31163283	16	31157970	31163283	-20.0833	85.5267	65.4434	87.1405	62.2295
Chr16:31182468-31192623	16	31182468	31192623	-37.5557	68.8391	31.2833	59.8876	19.3148
Chr16:33743321-33751919	16	33743321	33751919	-28.4708	42.2109	13.7401	21.4309	7.15217
Chr16:35646327-35652348	16	35646327	35652348	-35.3053	70.0475	34.7422	74.6185	25.2051
Chr16:35652384-35660024	16	35652384	35660024	-30.8812	62.4812	31.6	71.1312	24.1597
Chr16:35660026-35664116	16	35660026	35664116	-42.8498	65.767	22.9172	63.986	11.156
Chr16:35697288-35704467	16	35697288	35704467	-32.0791	60.6111	28.532	51.9738	46.5076
Chr16:64043700-64062910	16	64043700	64062910	-33.8544	40.4997	6.6453	10.8937	2.44444
Chr16:75194930-75216915	16	75194930	75216915	-36.4062	82.963	46.5568	82.9599	71.0814
Chr16:75260347-75275981	16	75260347	75275981	-44.9697	85.8333	40.8636	79.3843	72.7878
Chr16:75344704-75360703	16	75344704	75360703	-43.4475	92.5758	49.1283	85.3452	76.4853
Chr16:87601621-87609383	16	87601621	87609383	-37.8511	67.5932	29.742	63.3453	46.6609
Chr16:90037320-90043096	16	90037320	90043096	-31.6366	82.0439	50.4072	65.2622	8.59561
Chr16:92396881-92402242	16	92396881	92402242	-16.484	90.9683	74.4843	79.6015	81.8666
Chr16:92419127-92425052	16	92419127	92425052	-23.093	80.4976	57.4046	72.8689	32.6395
Chr16:94240737-94246784	16	94240737	94246784	-14.4871	86.5833	72.0962	69.6816	45.5385
Chr16:96451764-96466142	16	96451764	96466142	-26.5091	41.8212	15.312	28.1491	48.7653
Chr17:6005469-6013270	17	6005469	6013270	-36.3695	50.2876	13.9181	45.5382	8.97868
Chr17:6013437-6020746	17	6013437	6020746	-32.8296	48.0323	15.2027	43.0916	13.8871
Chr17:6020782-6026921	17	6020782	6026921	-36.4828	55.8901	19.4072	38.1542	7.37169
Chr17:6033919-6041108	17	6033919	6041108	-26.1658	75.894	49.7282	78.7612	36.9749
Chr17:7066834-7076815	17	7066834	7076815	-40.9718	71.5309	30.5592	44.9479	20.0652
Chr17:7183148-7190473	17	7183148	7190473	-28.1072	42.5304	14.4232	20.8134	12.8565
Chr17:8001474-8008941	17	8001474	8008941	-44.9337	59.2543	14.3207	39.0307	8.49514
Chr17:10411709-10421441	17	10411709	10421441	-27.5785	82.3283	54.7498	82.3104	35.0661
Chr17:10430220-10439677	17	10430220	10439677	-22.7994	92.6849	69.8855	90.1827	57.0256
Chr17:10467846-10477777	17	10467846	10477777	-20.3661	85.7602	65.3941	84.1411	52.1761
Chr17:10486142-10494791	17	10486142	10494791	-21.8369	87.5385	65.7016	86.6873	49.6366
Chr17:12397425-12407610	17	12397425	12407610	-30.4688	52.9344	22.4656	51.7317	19.0887
Chr17:12415383-12421284	17	12415383	12421284	-28.2051	57.7598	29.5546	51.1077	25.0806
Chr17:12943524-12956456	17	12943524	12956456	-33.9314	90.7929	56.8616	89.0013	39.7831
Chr17:25579358-25586154	17	25579358	25586154	-22.2437	33.6366	11.3929	28.9602	5.18211
Chr17:25586207-25593620	17	25586207	25593620	-36.4103	69.8977	33.4874	54.6374	14.8716
Chr17:25608276-25614517	17	25608276	25614517	-32.7363	49.9109	17.1746	35.9415	8.54409
Chr17:25614574-25622756	17	25614574	25622756	-39.8653	58.8797	19.0144	34.2788	10.0947
Chr17:27020409-27025378	17	27020409	27025378	-33.3703	77.8746	44.5043	68.1761	10.4364
Chr17:27071666-27077444	17	27071666	27077444	-36.1606	70.4637	34.303	63.0737	9.88486
Chr17:27077456-27084848	17	27077456	27084848	-42.0256	76.9362	34.9106	64.3718	12.1231
Chr17:27084853-27089972	17	27084853	27089972	-40.126	76.2362	36.1102	56.585	4.22733
Chr17:27094888-27099827	17	27094888	27099827	-32.9	69.2901	36.3901	60.2309	10.6486
Chr17:27099911-27105522	17	27099911	27105522	-48.7771	85.1902	36.4131	78.1385	3.73561
Chr17:27110719-27113832	17	27110719	27113832	-43.213	78.987	35.774	67.2032	4.58841
Chr17:27113841-27116726	17	27113841	27116726	-45.4596	80.8346	35.375	59.5304	2.77398
Chr17:27116756-27120041	17	27116756	27120041	-30.4194	89.9767	59.5573	79.4619	16.2507
Chr17:27468482-27474036	17	27468482	27474036	-30.8126	73.9471	43.1345	71.9871	11.6946
Chr17:27474056-27480470	17	27474056	27480470	-40.0159	79.102	39.0861	75.104	9.10337
Chr17:28340889-28347631	17	28340889	28347631	-25.4995	38.4673	12.9677	41.1701	4.9697
Chr17:29156598-29162484	17	29156598	29162484	-29.0393	77.4064	48.3671	66.5953	28.4653
Chr17:29197733-29206589	17	29197733	29206589	-29.059	47.6796	18.6206	19.8954	3.39571
Chr17:29239030-29244914	17	29239030	29244914	-41.7778	65.1644	23.3865	38.048	5.88116
Chr17:31456736-31465570	17	31456736	31465570	-37.3346	52.0401	14.7055	45.5776	30.5632
Chr17:31465887-31474514	17	31465887	31474514	-31.5815	53.5339	21.9524	53.1954	28.2356
Chr17:31564331-31565125	17	31564331	31565125	-8.0354	9.5655	1.53009	6.00573	1.83621
Chr17:32774765-32784207	17	32774765	32784207	-38.5599	61.5785	23.0186	44.2036	12.1002
Chr17:35002466-35008680	17	35002466	35008680	-35.8854	83.7463	47.8609	56.6126	18.7198
Chr17:56449202-56456556	17	56449202	56456556	-23.5778	84.96	61.3822	89.2012	36.7222
Chr17:69997771-70012392	17	69997771	70012392	-28.9246	44.3813	15.4566	22.2832	40.3155
Chr18:5220978-5235535	18	5220978	5235535	-18.0245	96.1594	78.1349	86.7074	81.9939
Chr18:10973207-10988179	18	10973207	10988179	-37.2301	66.6654	29.4353	59.1694	42.9307
Chr18:10988261-11001643	18	10988261	11001643	-38.771	75.4421	36.6711	62.2665	51.4011
Chr18:12517640-12526722	18	12517640	12526722	-42.9236	67.6656	24.742	47.7991	14.1955
Chr18:12527122-12537356	18	12527122	12537356	-24.6645	86.6645	62	85.0649	52.5423
Chr18:12544842-12553387	18	12544842	12553387	-34.3603	79.5827	45.2223	69.2746	31.7343
Chr18:12566690-12578308	18	12566690	12578308	-35.6013	80.5366	44.9353	85.7076	36.9758
Chr18:12806375-12816572	18	12806375	12816572	-24.2249	87.308	63.0832	93.4886	76.4
Chr18:20453736-20471246	18	20453736	20471246	-37.7912	63.3025	25.5114	50.5449	13.8959
Chr18:25589505-25596073	18	25589505	25596073	-27.861	53.0495	25.1886	47.0682	45.7215
Chr18:29977412-30000911	18	29977412	30000911	-37.1669	70.5842	33.4173	53.6498	58.4799
Chr18:67297384-67303641	18	67297384	67303641	-20.9148	89.7537	68.8389	87.5651	65.8558
Chr18:67303712-67310695	18	67303712	67310695	-34.3099	80.5592	46.2493	72.9867	50.0376
Chr18:67310712-67316280	18	67310712	67316280	-32.7305	82.1205	49.39	81.4635	45.1661
Chr18:67316368-67321716	18	67316368	67321716	-33.7134	52.6346	18.9211	26.9366	8.83764
Chr18:82557872-82562582	18	82557872	82562582	-50.0019	75.9474	25.9455	55.8838	45.349
Chr18:82581685-82585549	18	82581685	82585549	-46.9423	76.7527	29.8104	53.2359	54.2075
Chr18:82932305-82941022	18	82932305	82941022	-30.5301	83.4847	52.9545	78.7007	26.9864
Chr18:82955672-82959049	18	82955672	82959049	-31.4636	85.9252	54.4616	85.4588	20.534
Chr18:82964840-82971498	18	82964840	82971498	-40.6927	74.5343	33.8416	78.2931	18.962
Chr18:82977097-82983564	18	82977097	82983564	-35.8539	89.2304	53.3766	89.7741	28.8577
Chr18:82983598-82988717	18	82983598	82988717	-29.0817	66.574	37.4923	70.1787	16.352
Chr19:5512203-5522526	19	5512203	5522526	-47.7194	61.4149	13.6955	53.5523	16.5815
Chr19:5522578-5529642	19	5522578	5529642	-41.6525	66.7081	25.0556	54.8477	14.4869
Chr19:5529669-5536744	19	5529669	5536744	-36.8975	69.0387	32.1412	55.4553	25.3252
Chr19:5536801-5544216	19	5536801	5544216	-45.626	71.2214	25.5954	71.1812	16.1067
Chr19:9034945-9047616	19	9034945	9047616	-35.1883	67.3282	32.1399	52.1672	3.24786
Chr19:10403868-10413414	19	10403868	10413414	-21.9158	87.9014	65.9856	82.5405	57.2027
Chr19:17646770-17659547	19	17646770	17659547	-31.4562	74.1579	42.7016	61.4377	64.8081
Chr19:17705267-17723228	19	17705267	17723228	-38.4183	83.8782	45.4599	66.566	70.1773
Chr19:19137003-19153641	19	19137003	19153641	-31.0024	63.8154	32.8129	29.8077	22.2222
Chr19:25266360-25273774	19	25266360	25273774	-37.2624	55.3737	18.1113	40.819	15.5849
Chr19:25321195-25328168	19	25321195	25328168	-37.193	63.2072	26.0142	49.851	14.0668
Chr19:25406337-25410090	19	25406337	25410090	-30.7328	39.0283	8.29544	50.6173	10.8972
Chr19:25410095-25413931	19	25410095	25413931	-24.1704	77.3031	53.1326	77.0241	35.5126
Chr19:31139949-31153452	19	31139949	31153452	-33.0543	55.6598	22.6055	38.5977	16.8447
Chr19:31329678-31342520	19	31329678	31342520	-33.5834	69.0423	35.4589	55.5191	25.2431
Chr19:32641639-32648935	19	32641639	32648935	-31.6368	56.5159	24.879	41.0267	9.57994
Chr19:40672643-40681286	19	40672643	40681286	-38.0184	88.1642	50.1458	81.4094	71.6727
Chr19:40681493-40691338	19	40681493	40691338	-37.4016	92.4202	55.0186	80.8223	80.9614
Chr19:40691457-40699309	19	40691457	40699309	-42.4175	90.3562	47.9387	84.0331	77.555
Chr19:40699418-40711782	19	40699418	40711782	-28.1634	88.6624	60.499	82.4601	73.4593
Chr19:40711852-40720018	19	40711852	40720018	-31.2904	94.4238	63.1334	91.4782	82.3033
Chr19:42084970-42090248	19	42084970	42090248	-23.0823	34.6651	11.5829	38.3447	7.24806
Chr19:43348001-43365938	19	43348001	43365938	-30.1713	77.5551	47.3838	58.6385	36.6883
Chr19:43895421-43901941	19	43895421	43901941	-37.0775	68.5111	31.4336	50.5519	11.9219
Chr19:43907188-43915335	19	43907188	43915335	-35.6733	57.324	21.6507	50.0226	10.1232
Chr19:43915492-43921000	19	43915492	43921000	-25.8278	35.8105	9.98273	19.5544	1.16361
Chr19:43933006-43939915	19	43933006	43939915	-17.3172	32.1434	14.8262	22.868	8.02004
Chr19:46319527-46326260	19	46319527	46326260	-31.7602	78.5024	46.7422	70.0495	27.3027
Chr19:46732639-46739205	19	46732639	46739205	-35.099	71.1334	36.0345	58.9913	23.1274
Chr19:47218040-47226837	19	47218040	47226837	-43.1655	74.0538	30.8883	63.5076	54.3071
Chr19:47227138-47233131	19	47227138	47233131	-43.3904	74.4165	31.0261	48.8728	55.0664
Chr19:53001723-53005754	19	53001723	53005754	-23.4995	91.9018	68.4023	88.9005	68.4148
Chr19:53011511-53016911	19	53011511	53016911	-28.02	83.9317	55.9117	72.1501	56.41
Chr19:53027182-53032046	19	53027182	53032046	-33.4631	93.8222	60.359	90.8842	67.1163
Chr19:57701486-57710503	19	57701486	57710503	-40.5667	59.4124	18.8456	41.995	32.4306
Chr19:58082568-58087384	19	58082568	58087384	-39.363	66.2612	26.8982	48.6598	13.0666
ChrX:7819447-7824744	X	7819447	7824744	-27.3892	69.3422	41.953	54.377	69.6027
ChrX:20382805-20396534	X	20382805	20396534	-37.3309	61.2088	23.878	45.1361	80.1182
ChrX:50616660-50623798	X	50616660	50623798	-42.0039	72.3947	30.3908	55.6413	21.0997
ChrX:81363137-81388928	X	81363137	81388928	-40.9038	71.4747	30.5709	54.837	23.4217
ChrX:99141328-99147459	X	99141328	99147459	-21.7165	90.1443	68.4277	85.6069	41.4799
ChrX:100788336-100798103	X	100788336	100798103	-43.1801	71.3394	28.1594	60.3572	45.2565
ChrX:100798200-100809883	X	100798200	100809883	-25.0886	88.7043	63.6157	88.0943	78.0221
ChrX:100810037-100817258	X	100810037	100817258	-27.7976	90.0967	62.2991	89.3234	71.3148
ChrX:112551400-112578520	X	112551400	112578520	-34.1022	42.5219	8.41971	26.7733	25.997
ChrX:116894056-116921538	X	116894056	116921538	-35.8349	68.9802	33.1454	52.746	22.2258
ChrX:119017406-119050343	X	119017406	119050343	-37.1331	64.1706	27.0375	53.0406	27.91
ChrX:128616867-128650080	X	128616867	128650080	-34.5024	58.4894	23.987	42.699	11.1288
ChrX:134257249-134263882	X	134257249	134263882	-33.6201	72.4435	38.8234	61.2858	33.381
ChrX:155527261-155552025	X	155527261	155552025	-27.5886	41.4354	13.8467	26.4681	8.80867
				-33.8209
				-34.157

## Sheet: cDKO hyper DMRs
Probe	Chromosome	Start	End	Difference (Ehmt1/2 cDKO-Ehmt1/2 Control)	Ehmt2 Control	Ehmt2 cKO	Ehmt1/2 Control	Ehmt1/2 cDKO
Chr1:3345192-3368188	1	3345192	3368188	27.8724	64.9208	84.6352	53.3622	81.2346
Chr1:3392220-3413800	1	3392220	3413800	28.0687	80.1198	88.8666	62.6889	90.7576
Chr1:4947269-4961661	1	4947269	4961661	36.5149	56.0372	69.2382	39.0476	75.5625
Chr1:5248269-5259615	1	5248269	5259615	31.6075	21.193	38.9403	10.2841	41.8916
Chr1:12437120-12455114	1	12437120	12455114	58.7762	28.6991	75.5217	18.1386	76.9148
Chr1:12551051-12566105	1	12551051	12566105	39.7796	25.6269	66.5263	9.46597	49.2456
Chr1:12566263-12583059	1	12566263	12583059	49.122	30.6429	69.5597	11.0246	60.1466
Chr1:12583070-12592308	1	12583070	12592308	38.126	53.1747	88.0819	44.8653	82.9914
Chr1:12592319-12601363	1	12592319	12601363	30.7986	66.2043	86.8395	53.0625	83.861
Chr1:12831286-12837534	1	12831286	12837534	37.5382	32.9228	48.8957	20.4008	57.939
Chr1:12837599-12846562	1	12837599	12846562	18.9095	82.4489	81.7824	74.4046	93.3141
Chr1:14366180-14386470	1	14366180	14386470	34.7962	58.2003	51.6146	41.4053	76.2015
Chr1:16154348-16165119	1	16154348	16165119	33.9469	53.4704	67.9264	37.4972	71.4441
Chr1:16165176-16174501	1	16165176	16174501	32.6515	49.7991	55.9755	27.986	60.6375
Chr1:18650656-18663280	1	18650656	18663280	45.6391	50.2763	68.8108	23.7765	69.4156
Chr1:18663326-18682573	1	18663326	18682573	33.4296	60.4053	60.076	47.1	80.5296
Chr1:18975362-18988241	1	18975362	18988241	29.8397	35.1492	42.5872	14.024	43.8636
Chr1:18988716-19008249	1	18988716	19008249	36.9084	48.2768	61.117	23.447	60.3555
Chr1:19137834-19153154	1	19137834	19153154	25.9097	18.7659	39.3379	7.34104	33.2507
Chr1:19450000-19460559	1	19450000	19460559	30.2313	35.9333	38.996	26.1273	56.3587
Chr1:24452104-24460435	1	24452104	24460435	46.4352	8.91486	51.2038	13.4791	59.9143
Chr1:25813739-25827309	1	25813739	25827309	24.9514	15.0616	20.7163	6.40718	31.3586
Chr1:26168566-26190246	1	26168566	26190246	45.0521	42.2521	54.6747	15.6027	60.6549
Chr1:28697466-28726636	1	28697466	28726636	38.8941	49.1588	56.0016	34.8742	73.7683
Chr1:28985881-29010531	1	28985881	29010531	32.0716	29.6577	22.0225	10.2123	42.2839
Chr1:29454072-29479422	1	29454072	29479422	35.8828	44.8085	78.0027	42.9994	78.8822
Chr1:29574645-29588051	1	29574645	29588051	34.3509	39.0873	63.6074	27.9659	62.3168
Chr1:30071671-30085633	1	30071671	30085633	41.946	31.4703	56.8228	11.672	53.6181
Chr1:30085641-30090642	1	30085641	30090642	42.6228	62.8934	93.8419	45.36	87.9828
Chr1:30640529-30660163	1	30640529	30660163	35.5699	50.2732	56.1176	30.2278	65.7977
Chr1:31095117-31110180	1	31095117	31110180	35.0008	79.0452	71.0286	58.6897	93.6904
Chr1:31441021-31458317	1	31441021	31458317	42.1273	73.7623	88.9318	47.5852	89.7125
Chr1:32693413-32707080	1	32693413	32707080	44.8597	28.9895	50.7792	13.1883	58.048
Chr1:32707154-32727111	1	32707154	32727111	59.4421	48.6826	73.255	26.806	86.2481
Chr1:35564257-35579792	1	35564257	35579792	62.1078	30.2699	33.0254	8.42071	70.5285
Chr1:35580083-35596593	1	35580083	35596593	72.1241	22.978	50.7189	6.4766	78.6007
Chr1:35596619-35612059	1	35596619	35612059	24.7579	30.7281	33.5965	10.2852	35.0431
Chr1:36034415-36042036	1	36034415	36042036	25.2815	14.9044	31.9697	10.2798	35.5613
Chr1:39300285-39309224	1	39300285	39309224	26.4269	19.5328	33.4334	8.6713	35.0982
Chr1:39315366-39323474	1	39315366	39323474	56.371	38.3384	69.108	25.1046	81.4756
Chr1:39331631-39339025	1	39331631	39339025	29.2525	81.6964	82.6952	57.6511	86.9035
Chr1:40029440-40039117	1	40029440	40039117	38.1459	40.811	80.2322	40.1531	78.299
Chr1:40052441-40060683	1	40052441	40060683	28.323	54.9483	86.9967	45.1389	73.4619
Chr1:41850148-41873515	1	41850148	41873515	36.0822	21.6846	22.3326	12.5074	48.5896
Chr1:42261971-42274885	1	42261971	42274885	45.6619	38.2749	50.1453	13.9119	59.5738
Chr1:42274916-42283891	1	42274916	42283891	46.2169	58.3474	81.4999	28.7853	75.0022
Chr1:44006836-44027200	1	44006836	44027200	39.6122	46.4847	59.5203	39.9047	79.5169
Chr1:44027204-44041820	1	44027204	44041820	50.7329	20.8839	30.2191	2.63018	53.3631
Chr1:46551379-46563877	1	46551379	46563877	23.5578	81.4231	89.4451	67.9057	91.4635
Chr1:46595055-46610444	1	46595055	46610444	32.9412	62.235	74.4202	47.6773	80.6185
Chr1:48100615-48124908	1	48100615	48124908	52.8429	60.7738	63.8493	31.7192	84.5621
Chr1:51052332-51068785	1	51052332	51068785	34.302	37.9096	44.5398	28.4147	62.7167
Chr1:51118565-51132239	1	51118565	51132239	20.2003	24.3664	26.5439	6.78489	26.9852
Chr1:51147626-51164740	1	51147626	51164740	23.8541	76.6987	81.5506	73.9155	97.7696
Chr1:51349190-51362402	1	51349190	51362402	33.7745	26.2547	14.2361	3.84094	37.6155
Chr1:51362531-51372868	1	51362531	51372868	54.391	23.5373	14.5352	3.4157	57.8067
Chr1:51372978-51385749	1	51372978	51385749	45.0794	46.8909	50.093	35.0208	80.1002
Chr1:51400738-51412247	1	51400738	51412247	23.9625	20.2965	20.4977	3.97312	27.9356
Chr1:54143666-54161026	1	54143666	54161026	38.4069	20.1094	70.3219	12.1031	50.51
Chr1:57768779-57774879	1	57768779	57774879	8.22092	9.48847	9.53682	0	8.22092
Chr1:58241207-58254246	1	58241207	58254246	30.7698	45.8603	38.2774	27.3264	58.0962
Chr1:58254270-58263046	1	58254270	58263046	44.2223	50.6796	37.9574	46.5425	90.7648
Chr1:58263051-58275561	1	58263051	58275561	34.7307	35.8251	25.8506	19.4925	54.2232
Chr1:58768243-58781786	1	58768243	58781786	33.3655	38.4583	39.3132	16.4304	49.7958
Chr1:62644712-62655432	1	62644712	62655432	14.2038	18.8975	13.2053	2.32456	16.5283
Chr1:63667391-63680105	1	63667391	63680105	35.7978	13.7024	21.7991	6.45336	42.2512
Chr1:64168866-64178409	1	64168866	64178409	42.895	45.1166	49.4231	30.3053	73.2003
Chr1:64183959-64191078	1	64183959	64191078	25.8724	57.4172	76.9184	61.1744	87.0468
Chr1:64191166-64203483	1	64191166	64203483	53.3198	22.3482	15.5592	3.85963	57.1794
Chr1:64203524-64220831	1	64203524	64220831	30.963	25.3726	22.7392	3.79819	34.7612
Chr1:68745262-68764840	1	68745262	68764840	68.8906	31.2624	21.0383	7.14057	76.0311
Chr1:73211085-73223761	1	73211085	73223761	24.2132	77.3522	86.0405	66.6264	90.8396
Chr1:73297955-73310412	1	73297955	73310412	33.5923	35.8247	53.213	18.8698	52.4621
Chr1:73528159-73541115	1	73528159	73541115	40.785	27.2872	41.3304	8.73461	49.5196
Chr1:73553067-73572277	1	73553067	73572277	28.6929	57.9469	63.0071	36.7335	65.4263
Chr1:73852282-73860319	1	73852282	73860319	25.7699	27.5099	41.7753	10.0739	35.8438
Chr1:73860346-73870062	1	73860346	73870062	19.5446	11.9657	23.5809	1.93995	21.4845
Chr1:75403802-75408133	1	75403802	75408133	16.4374	29.2794	27.3256	4.70876	21.1462
Chr1:76871423-76884304	1	76871423	76884304	44.3233	57.2251	81.2326	26.6725	70.9958
Chr1:76901363-76920356	1	76901363	76920356	37.2907	37.8336	65.3675	19.1561	56.4468
Chr1:76921325-76944058	1	76921325	76944058	28.7404	26.8124	45.818	11.6142	40.3546
Chr1:77510346-77514458	1	77510346	77514458	13.0712	3.53746	7.21438	0.806452	13.8776
Chr1:77516342-77521741	1	77516342	77521741	17.4559	5.11736	9.53763	2.92797	20.3839
Chr1:77521746-77533703	1	77521746	77533703	16.5527	16.7364	7.85818	3.75706	20.3097
Chr1:77533917-77545912	1	77533917	77545912	31.9886	20.9538	25.866	3.13749	35.126
Chr1:77546180-77557982	1	77546180	77557982	34.3471	21.6934	25.8467	4.17958	38.5266
Chr1:77932509-77943501	1	77932509	77943501	37.8918	20.6224	34.1985	9.30807	47.1999
Chr1:79951045-79960492	1	79951045	79960492	21.9164	25.882	42.1123	8.21783	30.1342
Chr1:81281376-81300140	1	81281376	81300140	27.8872	64.747	63.9336	38.3165	66.2037
Chr1:81300158-81318605	1	81300158	81318605	34.6576	34.2597	54.1937	29.8632	64.5209
Chr1:83014926-83029514	1	83014926	83029514	31.5308	48.409	37.9135	16.8275	48.3583
Chr1:84388585-84405256	1	84388585	84405256	38.2097	62.0289	52.9378	52.3055	90.5152
Chr1:84405295-84418726	1	84405295	84418726	52.8853	54.9196	41.0384	33.0594	85.9448
Chr1:84418804-84437016	1	84418804	84437016	37.6222	48.0562	36.8361	27.6664	65.2887
Chr1:84437097-84450132	1	84437097	84450132	47.1881	65.2884	46.1074	39.2646	86.4527
Chr1:84495230-84512326	1	84495230	84512326	30.8048	32.7722	21.1257	11.0393	41.8441
Chr1:84512728-84528094	1	84512728	84528094	45.0437	40.5584	38.0821	27.8295	72.8731
Chr1:84571824-84584215	1	84571824	84584215	28.2163	70.746	46.7607	54.6126	82.829
Chr1:84584672-84596293	1	84584672	84596293	37.5262	35.9214	30.3108	27.8395	65.3657
Chr1:84596455-84611664	1	84596455	84611664	30.7152	47.5112	27.4749	33.4352	64.1504
Chr1:84621621-84630991	1	84621621	84630991	15.8374	15.4646	13.1973	3.46553	19.303
Chr1:84667506-84680151	1	84667506	84680151	27.9705	24.1852	19.5712	13.6362	41.6068
Chr1:85933020-85942102	1	85933020	85942102	40.4478	18.9887	17.2402	4.61265	45.0605
Chr1:85942393-85952814	1	85942393	85952814	37.0958	30.907	19.8961	9.58043	46.6762
Chr1:85952946-85963970	1	85952946	85963970	73.1375	35.8478	41.2543	16.6085	89.7459
Chr1:85964034-85978612	1	85964034	85978612	35.8939	54.5123	57.5974	40.4049	76.2988
Chr1:85978776-85990106	1	85978776	85990106	66.0077	45.821	58.0171	30.7386	96.7463
Chr1:85990122-86000169	1	85990122	86000169	29.4415	14.5832	19.6148	11.7655	41.2071
Chr1:86000206-86008784	1	86000206	86008784	44.3406	16.0637	27.9987	7.59123	51.9319
Chr1:86016960-86022086	1	86016960	86022086	15.4335	3.50026	8.54464	3.012	18.4455
Chr1:86022088-86031438	1	86022088	86031438	35.1083	24.7666	12.3915	4.17682	39.2851
Chr1:86260354-86269911	1	86260354	86269911	16.1119	91.315	91.6352	78.9094	95.0212
Chr1:86269924-86278405	1	86269924	86278405	27.1828	82.8995	87.5309	65.924	93.1067
Chr1:88053133-88074259	1	88053133	88074259	40.1829	55.9029	67.9358	34.1495	74.3325
Chr1:88377463-88391240	1	88377463	88391240	30.4618	16.8326	16.9828	5.30372	35.7655
Chr1:88471166-88480176	1	88471166	88480176	36.5756	24.2443	76.8231	32.5426	69.1182
Chr1:88498633-88508138	1	88498633	88508138	9.29238	11.3426	16.3958	1.45253	10.7449
Chr1:88638893-88651014	1	88638893	88651014	45.4032	46.522	69.6826	26.7536	72.1568
Chr1:88651037-88663429	1	88651037	88663429	47.2053	27.7967	47.5108	15.3449	62.5502
Chr1:88663470-88675272	1	88663470	88675272	27.4538	15.3413	19.4241	5.8279	33.2817
Chr1:88675508-88690630	1	88675508	88690630	22.4626	17.5879	20.6706	6.00475	28.4674
Chr1:89232834-89241434	1	89232834	89241434	29.8275	35.9266	47.1407	18.335	48.1626
Chr1:90335687-90347387	1	90335687	90347387	19.7143	26.3396	18.3237	5.96844	25.6827
Chr1:90347618-90361577	1	90347618	90361577	26.0929	26.3517	27.0595	5.62897	31.7219
Chr1:90381945-90393474	1	90381945	90393474	21.9802	12.8151	28.5754	2.49183	24.4721
Chr1:90393532-90402640	1	90393532	90402640	27.0691	15.1384	19.1425	4.3048	31.3739
Chr1:90402728-90411954	1	90402728	90411954	24.9781	19.8351	36.9744	8.53313	33.5112
Chr1:90648212-90657093	1	90648212	90657093	22.6844	78.0143	92.1684	64.2439	86.9283
Chr1:90657112-90667084	1	90657112	90667084	35.3921	41.37	40.5056	25.2284	60.6205
Chr1:90667162-90684630	1	90667162	90684630	52.7093	32.9092	43.635	14.227	66.9363
Chr1:90802078-90807979	1	90802078	90807979	34.3748	33.4093	48.9704	13.5456	47.9204
Chr1:90808001-90813612	1	90808001	90813612	9.31294	22.7981	23.6198	1.91973	11.2327
Chr1:90813645-90822108	1	90813645	90822108	30.8997	27.5942	40.0686	7.49929	38.399
Chr1:90822157-90829995	1	90822157	90829995	35.1669	29.0331	38.3148	7.38121	42.5481
Chr1:90830018-90838709	1	90830018	90838709	32.2353	29.574	32.78	3.90218	36.1375
Chr1:90838738-90846995	1	90838738	90846995	19.7596	20.6092	30.123	6.19207	25.9517
Chr1:90863995-90877612	1	90863995	90877612	24.2767	36.7115	42.1981	22.0234	46.3
Chr1:91203199-91213370	1	91203199	91213370	36.2262	39.3924	45.8833	26.0271	62.2532
Chr1:91213484-91223342	1	91213484	91223342	26.8098	48.6508	59.5708	33.9888	60.7986
Chr1:91566500-91574919	1	91566500	91574919	19.8641	37.6221	22.9227	11.988	31.8521
Chr1:91585892-91596780	1	91585892	91596780	35.575	31.0635	31.4979	18.8551	54.4301
Chr1:92186529-92198178	1	92186529	92198178	31.0321	31.5897	43.8946	20.1848	51.2169
Chr1:92198860-92209438	1	92198860	92209438	26.7185	27.3686	44.9827	10.0959	36.8144
Chr1:92989173-92999296	1	92989173	92999296	36.6839	52.0895	65.7029	38.1603	74.8443
Chr1:92999303-93009592	1	92999303	93009592	24.3642	29.4586	37.4711	8.64247	33.0067
Chr1:93009605-93018465	1	93009605	93018465	17.0896	21.9196	22.6943	6.01238	23.102
Chr1:93685942-93689151	1	93685942	93689151	9.70015	11.4772	15.3289	4.23895	13.9391
Chr1:97289266-97316983	1	97289266	97316983	33.5554	39.6503	56.3996	22.5993	56.1547
Chr1:102875011-102897696	1	102875011	102897696	40.7725	51.5679	56.5019	34.0735	74.8459
Chr1:105989887-105990813	1	105989887	105990813	4.09429	1.04381	2.44949	0	4.09429
Chr1:106119282-106130533	1	106119282	106130533	12.2583	31.5751	36.2477	3.70261	15.9609
Chr1:107465586-107487135	1	107465586	107487135	26.8261	28.1918	41.6695	14.1271	40.9531
Chr1:107487156-107506880	1	107487156	107506880	37.3386	62.7839	68.8454	42.1689	79.5076
Chr1:107507016-107526972	1	107507016	107526972	25.8517	71.6053	88.6564	67.5843	93.436
Chr1:113342675-113364325	1	113342675	113364325	41.7426	28.5363	59.8259	14.2059	55.9485
Chr1:113364772-113385120	1	113364772	113385120	44.7796	34.0791	56.7884	17.3211	62.1007
Chr1:114644079-114662682	1	114644079	114662682	44.6368	44.0877	48.2037	34.3859	79.0226
Chr1:114662709-114687330	1	114662709	114687330	45.6198	33.2506	36.6678	13.0514	58.6712
Chr1:115663643-115685586	1	115663643	115685586	11.2626	6.19435	7.63754	1.76519	13.0278
Chr1:115686089-115713198	1	115686089	115713198	40.6207	17.9174	14.0613	12.8421	53.4628
Chr1:115763540-115790057	1	115763540	115790057	30.5666	22.6405	16.7758	11.7308	42.2974
Chr1:115805355-115837020	1	115805355	115837020	34.4435	34.3371	16.8038	8.90576	43.3492
Chr1:115837070-115863173	1	115837070	115863173	23.4217	27.5442	18.4758	10.3404	33.7621
Chr1:116418119-116439233	1	116418119	116439233	32.0453	57.0059	45.6454	26.1122	58.1575
Chr1:116457598-116484456	1	116457598	116484456	30.1143	33.423	41.1225	19.8872	50.0014
Chr1:120369197-120378746	1	120369197	120378746	14.3924	12.2264	19.0822	6.49812	20.8905
Chr1:120924521-120940412	1	120924521	120940412	22.5094	15.1767	32.3129	5.37838	27.8878
Chr1:120940427-120960394	1	120940427	120960394	59.8713	21.5138	61.3541	12.8766	72.7478
Chr1:120970235-120982212	1	120970235	120982212	70.2758	32.0641	78.4703	8.62229	78.8981
Chr1:120982264-120994169	1	120982264	120994169	48.2446	23.544	62.6087	10.8975	59.1421
Chr1:121240113-121253788	1	121240113	121253788	16.7078	24.6532	21.9267	3.0271	19.7349
Chr1:121716832-121735562	1	121716832	121735562	30.5413	41.6752	34.0191	25.4255	55.9668
Chr1:121735664-121748911	1	121735664	121748911	21.4906	36.0383	39.6145	6.39064	27.8812
Chr1:125779447-125791260	1	125779447	125791260	13.4013	21.4035	15.4212	5.42894	18.8303
Chr1:125791349-125803501	1	125791349	125803501	8.08044	17.3974	18.9269	1.10892	9.18937
Chr1:125835716-125847663	1	125835716	125847663	22.1058	18.3539	22.6027	5.68625	27.792
Chr1:125866540-125874283	1	125866540	125874283	17.5188	19.1506	18.6393	6.47174	23.9906
Chr1:129141303-129157334	1	129141303	129157334	18.5616	17.1657	33.1005	7.97003	26.5316
Chr1:129157395-129179447	1	129157395	129179447	25.6582	21.522	43.6143	5.95742	31.6157
Chr1:129463596-129484598	1	129463596	129484598	38.9836	13.5393	30.7229	8.48367	47.4673
Chr1:129484725-129506351	1	129484725	129506351	32.7887	33.0935	24.0727	9.02131	41.81
Chr1:129586757-129604808	1	129586757	129604808	34.266	15.9159	27.7232	4.89413	39.1601
Chr1:129678153-129698426	1	129678153	129698426	19.6777	14.2015	34.776	5.89924	25.5769
Chr1:134010669-134022057	1	134010669	134022057	50.0352	45.1697	76.5281	23.5611	73.5963
Chr1:139197722-139206886	1	139197722	139206886	44.3974	28.9461	51.8253	8.87987	53.2773
Chr1:141666668-141685094	1	141666668	141685094	50.0877	52.5252	87.1964	36.9163	87.004
Chr1:144043173-144056524	1	144043173	144056524	39.7889	50.8904	66.3238	36.5537	76.3426
Chr1:145584243-145605566	1	145584243	145605566	27.8399	58.5019	39.7785	20.4715	48.3114
Chr1:150165589-150185495	1	150165589	150185495	32.7049	31.1706	39.4436	23.4409	56.1458
Chr1:150185725-150200520	1	150185725	150200520	31.3521	31.5948	34.3838	8.28595	39.638
Chr1:150914475-150927566	1	150914475	150927566	22.2994	18.0389	24.5833	4.67175	26.9711
Chr1:150927605-150939756	1	150927605	150939756	50.141	27.2646	32.3237	12.7876	62.9286
Chr1:150939815-150952370	1	150939815	150952370	27.8875	25.3741	19.4784	4.0982	31.9857
Chr1:152204369-152220632	1	152204369	152220632	35.288	42.6856	23.9983	25.6375	60.9255
Chr1:152220950-152231591	1	152220950	152231591	41.1478	59.3515	29.4016	36.5259	77.6737
Chr1:152231689-152241023	1	152231689	152241023	42.8942	42.2239	26.2891	23.6386	66.5328
Chr1:153332940-153340738	1	153332940	153340738	19.9349	7.29941	9.10755	2.08359	22.0185
Chr1:153340850-153354302	1	153340850	153354302	33.0358	73.7674	67.0095	51.1971	84.233
Chr1:153720285-153727619	1	153720285	153727619	34.4199	52.0478	64.0932	31.5357	65.9556
Chr1:154022621-154033168	1	154022621	154033168	24.0494	31.65	34.2435	20.4695	44.5189
Chr1:154033189-154050985	1	154033189	154050985	40.2171	41.0449	53.8207	23.897	64.1141
Chr1:154051280-154065510	1	154051280	154065510	39.4933	49.6631	56.7769	23.5238	63.0171
Chr1:154065608-154077990	1	154065608	154077990	44.871	45.2001	65.1936	22.8393	67.7103
Chr1:154787835-154794764	1	154787835	154794764	40.4353	22.5265	30.0166	7.00167	47.437
Chr1:154794798-154800826	1	154794798	154800826	12.8235	18.1784	15.5025	2.07037	14.8938
Chr1:156758597-156767292	1	156758597	156767292	22.4485	68.3972	87.4231	66.0947	88.5431
Chr1:157718769-157726395	1	157718769	157726395	45.3831	20.277	30.4582	2.5777	47.9608
Chr1:157726407-157738939	1	157726407	157738939	30.2795	18.6025	28.8587	7.43961	37.7191
Chr1:157750862-157762520	1	157750862	157762520	34.3977	19.3765	25.6071	3.66345	38.0612
Chr1:158616113-158631483	1	158616113	158631483	45.1619	50.135	40.4381	24.455	69.6169
Chr1:158631513-158647234	1	158631513	158647234	23.3499	28.5228	33.6726	8.66409	32.014
Chr1:158822485-158838634	1	158822485	158838634	34.7487	76.0071	73.051	53.6058	88.3545
Chr1:158838871-158848057	1	158838871	158848057	36.3691	39.262	39.0795	28.922	65.2911
Chr1:158848089-158861390	1	158848089	158861390	46.3749	61.6874	64.454	38.4257	84.8006
Chr1:158861669-158879649	1	158861669	158879649	30.5855	54.6302	45.9666	43.5467	74.1322
Chr1:158890422-158908495	1	158890422	158908495	42.5103	46.7618	44.4846	39.9523	82.4626
Chr1:159627909-159641241	1	159627909	159641241	63.3161	22.1221	56.7765	8.50097	71.8171
Chr1:159641249-159657072	1	159641249	159657072	39.9037	22.2268	30.8469	6.34028	46.244
Chr1:159657460-159668920	1	159657460	159668920	24.727	12.3914	18.1909	4.05872	28.7857
Chr1:159668941-159680670	1	159668941	159680670	12.6951	13.6392	9.72502	2.45579	15.1509
Chr1:159680733-159693352	1	159680733	159693352	17.0871	19.4567	15.5524	3.80048	20.8876
Chr1:164050780-164057076	1	164050780	164057076	19.4633	27.4208	22.4076	6.36928	25.8326
Chr1:164667977-164686817	1	164667977	164686817	26.2931	26.8504	46.3555	13.818	40.1111
Chr1:165243466-165253873	1	165243466	165253873	35.429	24.8912	40.9599	5.13849	40.5675
Chr1:166811489-166823369	1	166811489	166823369	25.9967	32.7234	50.7408	9.52881	35.5256
Chr1:166858940-166873224	1	166858940	166873224	32.5566	36.5238	68.1993	13.1083	45.665
Chr1:166873468-166890126	1	166873468	166890126	37.4916	55.5961	84.4557	35.6098	73.1015
Chr1:166890400-166903984	1	166890400	166903984	37.3281	45.4713	54.0494	20.4989	57.8269
Chr1:167078934-167093464	1	167078934	167093464	24.275	19.777	24.5997	5.76468	30.0397
Chr1:167093472-167103014	1	167093472	167103014	26.1031	17.4326	16.853	3.82532	29.9284
Chr1:167103044-167113096	1	167103044	167113096	26.3099	24.8945	10.4349	3.50461	29.8145
Chr1:167113190-167125284	1	167113190	167125284	20.1481	14.8239	18.5995	5.82627	25.9744
Chr1:167125733-167137343	1	167125733	167137343	78.8188	28.0853	58.3356	6.23967	85.0585
Chr1:167180055-167190527	1	167180055	167190527	39.3325	31.6874	49.8234	25.5541	64.8865
Chr1:167453804-167466330	1	167453804	167466330	30.1639	28.4704	19.5989	6.39621	36.5601
Chr1:167466420-167478023	1	167466420	167478023	44.6436	25.4808	23.6652	21.3354	65.9789
Chr1:167933196-167942506	1	167933196	167942506	24.802	63.7081	79.7231	50.7101	75.5121
Chr1:168061823-168076873	1	168061823	168076873	45.5386	50.6673	58.9701	32.8908	78.4294
Chr1:168077108-168087373	1	168077108	168087373	20.6125	34.1903	35.3128	12.4549	33.0674
Chr1:168161166-168170292	1	168161166	168170292	21.32	26.3164	17.6008	6.11871	27.4387
Chr1:168459901-168473906	1	168459901	168473906	35.0321	22.6534	26.0131	13.0874	48.1195
Chr1:168473980-168481122	1	168473980	168481122	30.6616	22.0494	17.7823	5.26936	35.931
Chr1:168567266-168582200	1	168567266	168582200	41.2348	37.0384	40.9833	25.1532	66.388
Chr1:168779772-168797486	1	168779772	168797486	36.1093	20.46	27.7404	6.76729	42.8766
Chr1:168885972-168903113	1	168885972	168903113	39.9	35.6884	15.0693	7.24164	47.1416
Chr1:169299862-169312652	1	169299862	169312652	21.0428	19.1948	32.1239	3.45399	24.4968
Chr1:169312668-169326852	1	169312668	169326852	24.4191	23.6594	48.7898	13.7331	38.1521
Chr1:169326909-169344537	1	169326909	169344537	43.0721	20.3926	41.2563	10.1362	53.2083
Chr1:169344568-169359589	1	169344568	169359589	49.43	29.7058	52.5435	7.04677	56.4768
Chr1:169359719-169372341	1	169359719	169372341	53.9018	30.0915	51.79	6.96171	60.8635
Chr1:169372352-169393216	1	169372352	169393216	60.2177	46.8648	64.2844	18.6677	78.8853
Chr1:169393354-169407129	1	169393354	169407129	46.905	25.4254	54.5476	8.58701	55.4921
Chr1:169407284-169420377	1	169407284	169420377	17.0538	17.4363	30.7476	0	17.0538
Chr1:169420396-169433330	1	169420396	169433330	43.0823	30.4829	45.5464	7.78422	50.8665
Chr1:169433514-169450739	1	169433514	169450739	58.1223	27.5699	59.3135	10.4017	68.524
Chr1:169450916-169462129	1	169450916	169462129	14.5338	21.6768	17.5856	4.59352	19.1273
Chr1:169815907-169830785	1	169815907	169830785	40.5057	32.8343	52.4215	13.7474	54.2531
Chr1:169844771-169858719	1	169844771	169858719	19.7312	17.1794	29.2017	7.45484	27.1861
Chr1:169858783-169872861	1	169858783	169872861	23.3359	18.3868	17.6025	9.72329	33.0592
Chr1:169873003-169884527	1	169873003	169884527	15.8287	27.1068	25.4525	8.14007	23.9688
Chr1:170174904-170180101	1	170174904	170180101	2.81992	4.69849	11.6813	0	2.81992
Chr1:171206789-171217154	1	171206789	171217154	27.2241	20.9215	13.5598	6.43677	33.6609
Chr1:171617236-171625301	1	171617236	171625301	35.0145	47.4571	33.7667	34.2857	69.3002
Chr1:172214899-172221541	1	172214899	172221541	24.3188	15.4192	28.0954	5.65934	29.9781
Chr1:172221626-172232082	1	172221626	172232082	35.8146	21.4479	24.9635	4.26114	40.0758
Chr1:172232139-172239713	1	172232139	172239713	23.1163	16.1266	23.8656	3.92336	27.0396
Chr1:175056635-175071935	1	175056635	175071935	59.0611	21.1464	13.4562	11.9114	70.9725
Chr1:175072051-175087402	1	175072051	175087402	82.8593	31.578	20.9886	8.25891	91.1182
Chr1:175087447-175103886	1	175087447	175103886	59.1176	26.4562	24.1767	12.7728	71.8904
Chr1:175103896-175123612	1	175103896	175123612	27.0536	25.3294	21.5552	8.55682	35.6104
Chr1:175166012-175186587	1	175166012	175186587	33.8667	15.4358	20.8996	5.38632	39.253
Chr1:175186630-175210608	1	175186630	175210608	50.9952	21.8954	25.9823	10.3851	61.3803
Chr1:175210691-175226960	1	175210691	175226960	59.9284	18.5909	13.9389	5.59263	65.5211
Chr1:175226979-175240297	1	175226979	175240297	55.3325	37.8727	43.1417	19.5221	74.8546
Chr1:175254947-175271835	1	175254947	175271835	56.2966	26.4574	19.1639	8.89225	65.1889
Chr1:175285579-175303305	1	175285579	175303305	73.1383	27.5546	30.3068	17.4877	90.626
Chr1:175303344-175319923	1	175303344	175319923	66.6122	36.961	24.5862	13.9773	80.5895
Chr1:175319982-175337274	1	175319982	175337274	55.1847	33.5965	17.9968	18.5556	73.7403
Chr1:175337647-175347539	1	175337647	175347539	34.8008	49.176	27.9159	1.47059	36.2714
Chr1:175347715-175363686	1	175347715	175363686	42.6842	31.1974	13.88	7.84772	50.5319
Chr1:175363989-175381665	1	175363989	175381665	59.306	27.7252	14.4632	9.01099	68.317
Chr1:175382012-175399095	1	175382012	175399095	66.3927	35.0566	41.5228	25.3007	91.6934
Chr1:175415540-175431171	1	175415540	175431171	69.633	36.8012	35.5456	21.1585	90.7915
Chr1:175431545-175443440	1	175431545	175443440	72.7615	43.6408	36.1503	22.245	95.0064
Chr1:175443672-175459222	1	175443672	175459222	71.1598	35.3516	34.8809	18.0731	89.2329
Chr1:175459363-175474923	1	175459363	175474923	47.9372	33.4604	24.9941	17.8908	65.828
Chr1:175475379-175485798	1	175475379	175485798	54.2189	33.0067	40.3141	19.2428	73.4617
Chr1:175555862-175574393	1	175555862	175574393	29.2564	29.8199	31.8794	10.1004	39.3568
Chr1:177550409-177562378	1	177550409	177562378	28.9025	15.1118	19.3563	6.5979	35.5004
Chr1:177562439-177571802	1	177562439	177571802	44.6952	22.8977	33.9985	7.9058	52.601
Chr1:177571931-177580408	1	177571931	177580408	28.6743	21.9928	17.8773	7.71031	36.3846
Chr1:178621051-178629424	1	178621051	178629424	34.3639	57.7069	59.3284	39.5931	73.957
Chr1:178636894-178645442	1	178636894	178645442	30.6958	45.7468	44.9179	26.9348	57.6306
Chr1:178645687-178655790	1	178645687	178655790	24.1283	74.3989	76.2473	60.0309	84.1592
Chr1:178655938-178667407	1	178655938	178667407	28.9697	71.0852	62.3313	48.7649	77.7346
Chr1:178866332-178875644	1	178866332	178875644	30.5526	57.8479	68.0565	44.9568	75.5093
Chr1:178895520-178911104	1	178895520	178911104	39.8894	58.9769	69.7676	48.3494	88.2387
Chr1:178911141-178916167	1	178911141	178916167	37.0796	71.0057	74.9031	57.0789	94.1585
Chr1:178916192-178920336	1	178916192	178920336	40.0792	57.0136	64.327	46.8903	86.9695
Chr1:182782368-182789840	1	182782368	182789840	31.2873	32.0409	52.37	16.1218	47.4091
Chr1:182789888-182795105	1	182789888	182795105	29.4162	28.71	50.8048	19.8637	49.2799
Chr1:182795216-182802248	1	182795216	182802248	36.5402	41.6788	73.1478	27.4222	63.9625
Chr1:182802307-182811417	1	182802307	182811417	34.3434	37.6872	56.6288	28.7146	63.058
Chr1:182811434-182818015	1	182811434	182818015	22.4176	27.8034	43.7273	16.9431	39.3607
Chr1:182818046-182824771	1	182818046	182824771	26.3334	25.3308	36.2966	6.4225	32.7559
Chr1:182824799-182833479	1	182824799	182833479	34.2234	27.5302	60.4457	18.5595	52.7829
Chr1:182833482-182840906	1	182833482	182840906	37.122	46.7485	64.457	24.9333	62.0553
Chr1:182849892-182856786	1	182849892	182856786	48.0311	38.7324	59.2189	20.1274	68.1585
Chr1:182856791-182864084	1	182856791	182864084	37.7637	28.8001	54.4429	9.84875	47.6125
Chr1:184116797-184134213	1	184116797	184134213	24.892	72.7366	82.841	64.5131	89.4052
Chr1:184134430-184148402	1	184134430	184148402	47.5304	62.692	77.484	41.8626	89.393
Chr1:184573325-184584455	1	184573325	184584455	13.464	15.552	18.0675	2.391	15.855
Chr1:184584457-184595134	1	184584457	184595134	26.7036	23.3674	48.1902	21.144	47.8476
Chr1:185037651-185047599	1	185037651	185047599	37.7702	24.9128	33.5463	18.9207	56.6909
Chr1:185047708-185056997	1	185047708	185056997	33.1492	59.0557	73.8356	52.4739	85.6231
Chr1:185572991-185586514	1	185572991	185586514	24.3914	72.097	81.1637	64.8608	89.2521
Chr1:185598134-185610807	1	185598134	185610807	31.0782	21.0946	38.0944	18.4519	49.5301
Chr1:185610880-185620540	1	185610880	185620540	38.2223	64.0414	86.0408	46.0938	84.3161
Chr1:185791037-185805956	1	185791037	185805956	30.2059	45.6202	49.4299	31.0564	61.2623
Chr1:186368080-186381747	1	186368080	186381747	19.3341	28.7795	24.2915	6.77432	26.1084
Chr1:186857127-186865978	1	186857127	186865978	37.4003	15.3624	27.7802	6.55668	43.9569
Chr1:190324684-190334456	1	190324684	190334456	34.5974	19.4726	44.417	4.073	38.6704
Chr1:190334618-190345818	1	190334618	190345818	52.6456	17.7881	42.8547	3.504	56.1496
Chr1:190345910-190355198	1	190345910	190355198	20.5036	20.572	17.5817	4.0456	24.5492
Chr1:190549652-190557157	1	190549652	190557157	26.2033	44.4485	55.0593	14.0351	40.2385
Chr1:193514472-193530150	1	193514472	193530150	30.6214	26.7635	28.7164	9.63449	40.2559
Chr1:193541958-193556798	1	193541958	193556798	21.5735	24.6531	31.033	14.1997	35.7732
Chr1:193556825-193572825	1	193556825	193572825	22.597	29.448	30.6963	13.4843	36.0812
Chr1:193972181-193992266	1	193972181	193992266	21.5362	15.7369	22.5369	10.21	31.7463
Chr1:193993402-194021553	1	193993402	194021553	36.7866	26.5402	22.74	21.4169	58.2036
Chr1:194021687-194042599	1	194021687	194042599	33.8188	21.2653	20.3078	7.05424	40.873
Chr2:3161125-3170617	2	3161125	3170617	26.1056	77.2384	52.9893	69.4055	95.5111
Chr2:3570487-3584012	2	3570487	3584012	25.0924	29.5863	48.434	12.572	37.6645
Chr2:4481844-4490000	2	4481844	4490000	14.9428	22.6026	26.5565	3.33597	18.2788
Chr2:7671285-7697558	2	7671285	7697558	21.9692	74.2085	85.8713	67.8789	89.8481
Chr2:8024399-8037570	2	8024399	8037570	29.631	22.1178	45.7584	6.22362	35.8546
Chr2:10169806-10177764	2	10169806	10177764	41.7025	46.3015	83.0857	42.1488	83.8512
Chr2:10672292-10685836	2	10672292	10685836	53.8548	27.8984	34.0367	8.40009	62.2549
Chr2:11072594-11090429	2	11072594	11090429	36.9942	74.2053	85.5223	45.6545	82.6486
Chr2:11696780-11706012	2	11696780	11706012	32.5152	34.5899	34.499	24.3209	56.8362
Chr2:11706078-11715385	2	11706078	11715385	38.2876	22.9627	32.146	10.5568	48.8444
Chr2:13784996-13793554	2	13784996	13793554	22.1741	9.73667	22.5345	13.0777	35.2518
Chr2:13803085-13818046	2	13803085	13818046	48.8142	50.9456	63.3929	21.1325	69.9467
Chr2:19261559-19273279	2	19261559	19273279	15.471	14.1705	21.4264	4.58986	20.0608
Chr2:19460328-19479518	2	19460328	19479518	18.4614	19.3229	31.4745	6.08403	24.5454
Chr2:19515966-19527256	2	19515966	19527256	11.0758	7.29711	16.0354	2.14286	13.2187
Chr2:20014738-20027281	2	20014738	20027281	77.2057	24.9791	59.0894	11.3477	88.5534
Chr2:20229224-20239081	2	20229224	20239081	32.7551	32.4759	49.4957	15.1224	47.8776
Chr2:20261785-20278772	2	20261785	20278772	35.4316	35.3813	46.4047	19.2623	54.6939
Chr2:20351299-20372654	2	20351299	20372654	18.9657	28.0189	31.2419	10.2771	29.2427
Chr2:20519388-20523100	2	20519388	20523100	41.5673	43.7205	43.3531	36.2355	77.8028
Chr2:20523345-20535515	2	20523345	20535515	31.3655	31.9777	38.6884	20.9739	52.3394
Chr2:20535532-20547253	2	20535532	20547253	38.2766	51.951	59.853	39.0281	77.3048
Chr2:20547380-20559200	2	20547380	20559200	37.8475	48.905	65.074	38.1124	75.9599
Chr2:20559209-20571992	2	20559209	20571992	37.8862	59.629	52.0982	39.2838	77.17
Chr2:20628957-20642904	2	20628957	20642904	36.7676	31.9643	45.5869	32.1457	68.9133
Chr2:20642912-20654969	2	20642912	20654969	32.2958	37.2799	33.8196	18.1488	50.4445
Chr2:20654972-20667092	2	20654972	20667092	29.1888	37.2075	36.3594	16.2572	45.446
Chr2:20667110-20675074	2	20667110	20675074	14.3875	28.9952	24.2383	5.70316	20.0906
Chr2:20675214-20685765	2	20675214	20685765	36.2063	38.1062	41.9683	19.5025	55.7088
Chr2:20713430-20722880	2	20713430	20722880	37.0566	57.4921	60.2329	36.9802	74.0368
Chr2:25803034-25813347	2	25803034	25813347	15.7223	17.5488	16.9823	3.58288	19.3052
Chr2:25888912-25898781	2	25888912	25898781	14.4714	27.4917	20.3261	4.36766	18.8391
Chr2:25905320-25912063	2	25905320	25912063	15.4479	27.3719	27.3893	9.00296	24.4509
Chr2:26237491-26245741	2	26237491	26245741	24.5978	14.7667	34.3644	4.35652	28.9543
Chr2:26245882-26256948	2	26245882	26256948	15.1013	14.8545	23.7025	3.78133	18.8827
Chr2:27824527-27835426	2	27824527	27835426	31.2226	37.3841	18.1308	22.2523	53.4749
Chr2:28047254-28056609	2	28047254	28056609	16.3519	18.5595	26.0689	2.90396	19.2559
Chr2:28907556-28909860	2	28907556	28909860	34.877	2.27146	4.19792	3.19039	38.0674
Chr2:28909877-28912639	2	28909877	28912639	36.7098	8.69713	5.20681	5.6563	42.3661
Chr2:30517296-30527230	2	30517296	30527230	19.2005	23.5538	27.3192	9.33267	28.5332
Chr2:33537050-33544251	2	33537050	33544251	40.5325	30.3479	26.3181	27.4466	67.9792
Chr2:33544252-33549677	2	33544252	33549677	48.6101	17.5064	16.2789	10.1102	58.7203
Chr2:33549757-33557359	2	33549757	33557359	41.9743	20.363	21.4222	3.20924	45.1836
Chr2:33557608-33564134	2	33557608	33564134	18.04	19.1024	11.9526	2.8401	20.8801
Chr2:38406556-38417290	2	38406556	38417290	39.9924	11.3984	11.4469	4.99668	44.9891
Chr2:40291485-40315441	2	40291485	40315441	20.0273	19.8573	33.5554	9.7566	29.7839
Chr2:43743708-43758205	2	43743708	43758205	52.4867	26.1527	48.9938	10.0206	62.5073
Chr2:43758240-43775053	2	43758240	43775053	36.117	21.2541	30.5265	7.06002	43.1771
Chr2:45414877-45435831	2	45414877	45435831	18.5801	79.9738	77.7083	76.2818	94.8619
Chr2:45711907-45725900	2	45711907	45725900	48.9967	21.0929	27.3552	5.15316	54.1499
Chr2:45928752-45946299	2	45928752	45946299	32.1661	78.8522	79.05	48.1165	80.2826
Chr2:48563197-48577187	2	48563197	48577187	28.801	40.9943	70.372	10.9755	39.7765
Chr2:59357245-59369764	2	59357245	59369764	41.0738	25.1504	75.2403	11.9204	52.9942
Chr2:60638649-60647402	2	60638649	60647402	25.8182	17.216	27.4921	6.78931	32.6075
Chr2:60647551-60661177	2	60647551	60661177	40.3617	25.1738	22.9553	4.87128	45.233
Chr2:61567957-61580201	2	61567957	61580201	29.7161	20.4127	11.0993	14.8449	44.5609
Chr2:62268176-62281054	2	62268176	62281054	31.9408	41.413	47.694	31.112	63.0528
Chr2:62670116-62681009	2	62670116	62681009	29.6996	66.8354	84.7885	64.3869	94.0865
Chr2:62681022-62694895	2	62681022	62694895	17.9968	80.0886	90.7739	79.3365	97.3333
Chr2:64555976-64574722	2	64555976	64574722	46.6844	37.918	47.0898	13.9036	60.5879
Chr2:65401051-65414464	2	65401051	65414464	16.2284	92.5266	73.9962	80.5216	96.75
Chr2:66016647-66022913	2	66016647	66022913	19.0994	80.2646	88.5704	74.9139	94.0134
Chr2:67097549-67117160	2	67097549	67117160	46.6358	41.9458	46.6058	22.728	69.3638
Chr2:67117163-67137184	2	67117163	67137184	39.0662	29.0081	20.132	9.63998	48.7061
Chr2:67137206-67152190	2	67137206	67152190	35.385	49.4621	48.4999	31.1368	66.5217
Chr2:69243636-69256983	2	69243636	69256983	38.0082	20.657	38.0371	12.8189	50.8271
Chr2:69257007-69270166	2	69257007	69270166	24.1542	36.9382	32.9466	15.5448	39.6991
Chr2:69270231-69287608	2	69270231	69287608	29.2605	28.7493	23.605	13.6401	42.9007
Chr2:69728454-69745847	2	69728454	69745847	10.5776	93.3306	91.2329	89.4224	100
Chr2:72571422-72581956	2	72571422	72581956	20.4053	15.9656	24.9893	3.17736	23.5826
Chr2:72582545-72595552	2	72582545	72595552	42.1619	24.5884	53.3156	2.80668	44.9686
Chr2:74070978-74079346	2	74070978	74079346	11.385	16.4502	12.7482	2.88094	14.266
Chr2:74378934-74392895	2	74378934	74392895	67.7782	22.2077	44.8821	14.5216	82.2998
Chr2:74479171-74486876	2	74479171	74486876	27.3189	70.9142	79.4154	56.298	83.6168
Chr2:74617365-74629202	2	74617365	74629202	61.2761	34.4429	45.5828	16.9473	78.2234
Chr2:74749505-74752977	2	74749505	74752977	9.4025	6.23296	3.17916	1.60132	11.0038
Chr2:74752979-74760782	2	74752979	74760782	12.5072	15.3352	4.03966	1.13075	13.638
Chr2:75027278-75035618	2	75027278	75035618	35.0695	50.3011	54.5953	29.4285	64.4981
Chr2:75951268-75958779	2	75951268	75958779	17.8508	22.402	29.4694	5.52756	23.3784
Chr2:78595413-78605955	2	78595413	78605955	23.1683	16.978	20.0534	8.08973	31.258
Chr2:79273176-79289391	2	79273176	79289391	17.3639	16.9113	27.8172	4.66711	22.031
Chr2:79945677-79959158	2	79945677	79959158	31.2949	38.6685	58.8917	28.4416	59.7365
Chr2:82978733-82993806	2	82978733	82993806	51.1245	20.7146	58.1358	6.71127	57.8357
Chr2:83166004-83186539	2	83166004	83186539	43.5177	22.8982	68.8791	15.0141	58.5317
Chr2:83923985-83933254	2	83923985	83933254	45.2981	55.3266	88.0787	36.2566	81.5547
Chr2:83933918-83947497	2	83933918	83947497	62.8783	28.0304	43.3898	9.10942	71.9877
Chr2:84439547-84452541	2	84439547	84452541	48.3486	37.9284	39.3577	27.4948	75.8434
Chr2:84482139-84490988	2	84482139	84490988	55.5744	32.3284	23.8732	11.8181	67.3925
Chr2:89909388-89917170	2	89909388	89917170	32.5192	58.4982	57.9976	39.1579	71.677
Chr2:89917190-89942163	2	89917190	89942163	43.8222	49.2824	60.407	36.7148	80.537
Chr2:93606155-93614721	2	93606155	93614721	30.5674	74.2428	92.9783	57.586	88.1534
Chr2:93614762-93619678	2	93614762	93619678	57.8698	66.2686	88.4134	22.7089	80.5787
Chr2:93619750-93629157	2	93619750	93629157	49.382	40.4582	74.8752	19.3882	68.7702
Chr2:95190554-95211107	2	95190554	95211107	24.4751	56.8169	70.824	46.4845	70.9596
Chr2:101196787-101213886	2	101196787	101213886	34.7958	41.088	51.9512	21.3224	56.1182
Chr2:101317287-101330637	2	101317287	101330637	32.7594	42.1625	17.0061	10.5635	43.3229
Chr2:101330667-101345477	2	101330667	101345477	45.7986	41.2959	34.9257	13.5687	59.3672
Chr2:103897074-103906313	2	103897074	103906313	16.14	23.8281	14.1526	3.96595	20.106
Chr2:103916167-103928467	2	103916167	103928467	14.2177	16.2446	25.1326	4.72303	18.9407
Chr2:103992302-104002306	2	103992302	104002306	49.7658	51.0404	45.7184	27.5694	77.3352
Chr2:104002330-104011928	2	104002330	104011928	18.8017	20.9656	26.8096	5.4596	24.2613
Chr2:105324777-105331391	2	105324777	105331391	33.5309	60.9182	75.4107	28.7775	62.3084
Chr2:106042078-106052852	2	106042078	106052852	27.5396	40.7943	42.508	18.4741	46.0137
Chr2:106471311-106488936	2	106471311	106488936	37.6649	75.0877	70.0242	49.2531	86.918
Chr2:106506311-106522326	2	106506311	106522326	43.5466	61.9832	77.1239	36.107	79.6535
Chr2:106858731-106864925	2	106858731	106864925	40.2206	38.1733	17.1295	15.3669	55.5875
Chr2:106865097-106873394	2	106865097	106873394	28.4785	46.8421	17.5232	25.3591	53.8376
Chr2:109645012-109662936	2	109645012	109662936	37.595	11.0926	13.7428	4.51653	42.1115
Chr2:109697348-109719340	2	109697348	109719340	36.4727	17.8139	10.1644	8.38112	44.8538
Chr2:109720107-109727695	2	109720107	109727695	20.7079	16.3367	14.8491	2.56516	23.273
Chr2:110141450-110157596	2	110141450	110157596	37.9213	74.405	73.4653	50.9769	88.8982
Chr2:110157598-110172791	2	110157598	110172791	62.953	28.0674	50.3883	21.9323	84.8853
Chr2:110172811-110186186	2	110172811	110186186	54.5439	17.6738	14.57	6.61546	61.1594
Chr2:110186223-110198782	2	110186223	110198782	21.0867	9.87447	18.6385	2.1185	23.2052
Chr2:110198844-110209208	2	110198844	110209208	28.6015	14.9475	17.1927	1.39123	29.9927
Chr2:113903058-113919894	2	113903058	113919894	33.9692	25.4676	43.5082	10.2695	44.2388
Chr2:114789165-114807842	2	114789165	114807842	12.8357	26.8128	9.61991	3.95323	16.7889
Chr2:114807845-114823959	2	114807845	114823959	12.3926	22.0323	12.8195	2.56538	14.958
Chr2:117615943-117631345	2	117615943	117631345	41.5228	71.4268	72.3106	37.7284	79.2511
Chr2:120303346-120313768	2	120303346	120313768	30.7479	61.6376	83.6668	52.9728	83.7207
Chr2:121069773-121080754	2	121069773	121080754	29.606	56.9722	54.1808	13.2026	42.8085
Chr2:121080757-121093914	2	121080757	121093914	26.436	33.5404	38.9612	11.6168	38.0528
Chr2:122160237-122168325	2	122160237	122168325	31.4274	17.9998	42.3716	3.6233	35.0507
Chr2:122168414-122182003	2	122168414	122182003	43.2755	34.3424	58.2055	12.2787	55.5542
Chr2:122182243-122192738	2	122182243	122192738	27.2339	24.6611	32.8596	10.8588	38.0927
Chr2:122192741-122204088	2	122192741	122204088	46.4361	22.7323	56.0551	11.0038	57.4398
Chr2:122638334-122644057	2	122638334	122644057	13.8841	34.5215	23.9156	1.50735	15.3914
Chr2:123376227-123395091	2	123376227	123395091	33.8396	74.271	82.2925	43.9689	77.8086
Chr2:123395316-123420498	2	123395316	123420498	44.6164	35.7151	42.8316	13.2384	57.8548
Chr2:125190825-125200874	2	125190825	125200874	32.8573	61.7934	47.0633	45.5842	78.4415
Chr2:125200887-125210035	2	125200887	125210035	36.819	57.6377	33.4154	43.229	80.048
Chr2:125210355-125218003	2	125210355	125218003	31.0385	50.4989	24.3932	35.6247	66.6632
Chr2:125297860-125306523	2	125297860	125306523	18.7704	30.5436	36.1986	10.7471	29.5175
Chr2:128301921-128310409	2	128301921	128310409	20.4054	18.963	25.3864	3.33186	23.7373
Chr2:128310624-128321336	2	128310624	128321336	60.7319	36.3648	63.2266	14.3596	75.0915
Chr2:128321433-128331024	2	128321433	128331024	56.3271	31.7261	68.1614	18.5278	74.8549
Chr2:128369934-128378752	2	128369934	128378752	10.1955	21.3846	17.3129	3.09598	13.2915
Chr2:128412209-128419115	2	128412209	128419115	25.5546	12.8623	19.9828	3.71563	29.2703
Chr2:128419319-128429113	2	128419319	128429113	69.3024	17.7168	39.6893	3.52751	72.8299
Chr2:128429118-128437403	2	128429118	128437403	81.6088	28.5096	50.7301	6.24657	87.8554
Chr2:128437576-128447624	2	128437576	128447624	76.5435	21.4524	42.8339	3.5796	80.1231
Chr2:128447716-128458026	2	128447716	128458026	72.5355	25.5863	56.5366	5.94842	78.4839
Chr2:128458083-128468288	2	128458083	128468288	83.8962	25.1765	63.1841	4.90522	88.8014
Chr2:128468311-128477532	2	128468311	128477532	76.9858	17.0932	54.1267	12.1956	89.1815
Chr2:128487167-128498528	2	128487167	128498528	17.3568	13.5528	17.7961	2.46644	19.8232
Chr2:131647834-131659494	2	131647834	131659494	25.3387	66.6758	85.7667	58.8071	84.1458
Chr2:131728851-131742010	2	131728851	131742010	16.3719	18.5558	15.4446	4.41903	20.7909
Chr2:132580999-132593063	2	132580999	132593063	17.5703	21.7866	19.9203	4.18003	21.7503
Chr2:133023203-133037506	2	133023203	133037506	27.0258	56.621	65.681	35.1172	62.1429
Chr2:133135027-133147348	2	133135027	133147348	19.7566	18.4466	14.445	7.54334	27.2999
Chr2:133976909-133994479	2	133976909	133994479	18.6242	17.2776	9.88636	6.16933	24.7935
Chr2:134333550-134351154	2	134333550	134351154	33.6772	60.8754	71.6786	46.7228	80.4
Chr2:135486426-135500107	2	135486426	135500107	36.1024	26.7198	48.8989	18.4337	54.5361
Chr2:135947468-135956251	2	135947468	135956251	27.8495	22.9417	18.9389	14.5239	42.3734
Chr2:135956302-135963452	2	135956302	135963452	23.4207	17.508	19.905	8.6894	32.1101
Chr2:136442897-136459014	2	136442897	136459014	30.0071	27.6229	36.8611	14.5261	44.5332
Chr2:136631582-136647818	2	136631582	136647818	30.4254	23.6293	25.1562	8.0754	38.5008
Chr2:136647885-136669478	2	136647885	136669478	59.369	24.1969	33.0819	7.44115	66.8102
Chr2:136669798-136679094	2	136669798	136679094	11.1608	4.5126	7.59137	1.94236	13.1032
Chr2:136714360-136727227	2	136714360	136727227	25.8123	18.237	29.8812	4.6309	30.4432
Chr2:136727383-136744559	2	136727383	136744559	38.9686	21.4816	15.5338	9.03544	48.004
Chr2:136744621-136760107	2	136744621	136760107	53.9076	22.5688	19.2899	12.0968	66.0044
Chr2:136777390-136791007	2	136777390	136791007	49.038	29.2598	25.3414	14.6501	63.6881
Chr2:139539943-139562421	2	139539943	139562421	36.0574	37.8842	41.4217	23.2753	59.3327
Chr2:139678786-139694277	2	139678786	139694277	26.4442	14.299	21.2724	11.1656	37.6099
Chr2:139694654-139712327	2	139694654	139712327	14.3798	25.9385	16.7151	5.37237	19.7522
Chr2:139730330-139745823	2	139730330	139745823	44.9785	32.0623	26.0913	14.1839	59.1624
Chr2:139745842-139757324	2	139745842	139757324	39.8706	30.8589	19.9815	15.2978	55.1684
Chr2:140089400-140105149	2	140089400	140105149	32.2977	49.802	45.0993	32.3636	64.6614
Chr2:140105177-140119853	2	140105177	140119853	36.6524	60.0389	40.7549	43.4791	80.1315
Chr2:140238800-140250756	2	140238800	140250756	23.4043	17.5204	26.1784	3.82108	27.2254
Chr2:140250787-140263468	2	140250787	140263468	35.8669	21.1197	18.4538	7.21314	43.0801
Chr2:140263488-140277826	2	140263488	140277826	51.5256	26.1736	32.152	10.0728	61.5984
Chr2:140277909-140292870	2	140277909	140292870	50.7569	25.1568	33.7082	7.85576	58.6127
Chr2:140292875-140312068	2	140292875	140312068	30.5694	21.9377	24.5217	13.2721	43.8415
Chr2:140331867-140347234	2	140331867	140347234	49.0869	32.6957	56.5477	20.8408	69.9277
Chr2:140363542-140379615	2	140363542	140379615	40.2086	18.4821	28.8991	11.0177	51.2263
Chr2:142339648-142361265	2	142339648	142361265	30.6965	58.5284	65.1191	43.7508	74.4473
Chr2:142513944-142529096	2	142513944	142529096	61.2308	23.2955	54.9637	9.57702	70.8079
Chr2:142529595-142548050	2	142529595	142548050	30.9249	23.377	42.1057	6.41204	37.3369
Chr2:143741371-143753520	2	143741371	143753520	31.3836	15.8411	19.5273	8.60724	39.9909
Chr2:146721093-146731308	2	146721093	146731308	43.0501	18.5099	41.8603	3.56003	46.6101
Chr2:146731576-146745481	2	146731576	146745481	70.3299	31.4142	75.4512	7.17906	77.509
Chr2:146745483-146758739	2	146745483	146758739	18.2145	19.0238	15.5177	8.08532	26.2998
Chr2:147179016-147183152	2	147179016	147183152	27.492	7.46972	12.3152	3.21003	30.7021
Chr2:149546595-149564381	2	149546595	149564381	34.7567	43.5069	55.2999	25.4394	60.1961
Chr2:149564676-149592170	2	149564676	149592170	39.2025	66.4257	79.2454	37.512	76.7145
Chr2:149677572-149700567	2	149677572	149700567	39.6509	58.3719	82.7782	37.7285	77.3793
Chr2:149700762-149721256	2	149700762	149721256	38.4723	59.8681	84.1329	43.4721	81.9445
Chr2:149830541-149831961	2	149830541	149831961	40.0817	28.7865	69.5582	24.2311	64.3128
Chr2:150678125-150686360	2	150678125	150686360	23.4682	17.9723	17.1366	0.944445	24.4127
Chr2:150998538-151008180	2	150998538	151008180	44.2395	33.5968	69.225	16.7418	60.9813
Chr2:151008193-151012320	2	151008193	151012320	11.7648	4.61677	6.31081	1.62292	13.3877
Chr2:152830617-152832198	2	152830617	152832198	3.12627	3.01043	4.06579	0	3.12627
Chr2:152968549-152981180	2	152968549	152981180	53.4641	51.1049	67.3522	27.4308	80.8949
Chr2:152981186-152988963	2	152981186	152988963	52.9721	47.1649	47.0559	29.9323	82.9044
Chr2:152988995-152995867	2	152988995	152995867	35.9443	59.83	73.8485	52.6147	88.559
Chr2:152996050-153005420	2	152996050	153005420	39.2868	69.8964	77.2488	49.9386	89.2254
Chr2:153649491-153650842	2	153649491	153650842	23.7942	54.7941	56.7648	70.9475	94.7417
Chr2:157009800-157018442	2	157009800	157018442	10.5221	17.6319	18.6096	3.88263	14.4048
Chr2:157018450-157023016	2	157018450	157023016	23.0036	34.4614	23.9439	9.56208	32.5657
Chr2:157023042-157029001	2	157023042	157029001	18.0662	23.4765	28.3517	7.38513	25.4514
Chr2:157066190-157074489	2	157066190	157074489	9.28004	11.7731	16.5552	2.47224	11.7523
Chr2:158122470-158129358	2	158122470	158129358	22.0754	30.8247	28.136	10.8626	32.9381
Chr2:158195250-158203109	2	158195250	158203109	35.5017	23.3918	19.8586	7.84703	43.3488
Chr2:158203110-158209807	2	158203110	158209807	13.1698	13.6547	13.6194	3.50922	16.679
Chr2:158209823-158217307	2	158209823	158217307	26.8276	23.0717	15.5017	2.43458	29.2621
Chr2:158290164-158297688	2	158290164	158297688	33.9674	10.8687	19.8197	4.51223	38.4796
Chr2:158297724-158308466	2	158297724	158308466	27.8905	24.9844	34.3279	8.63648	36.527
Chr2:158308507-158317072	2	158308507	158317072	44.7892	60.4465	67.2846	41.0523	85.8415
Chr2:158376087-158382519	2	158376087	158382519	13.5204	11.5813	19.7484	4.16695	17.6873
Chr2:158743814-158750634	2	158743814	158750634	26.0171	42.0829	18.1019	23.5579	49.575
Chr2:158750700-158759547	2	158750700	158759547	32.4401	49.6448	21.6504	31.9126	64.3527
Chr2:158920544-158931128	2	158920544	158931128	28.2619	32.865	32.6458	16.853	45.115
Chr2:159008899-159019604	2	159008899	159019604	13.2536	20.4881	17.3259	2.19081	15.4444
Chr2:159776576-159789097	2	159776576	159789097	30.5912	38.8535	34.8959	5.62095	36.2121
Chr2:159789150-159803780	2	159789150	159803780	48.9952	42.2741	55.1173	5.48845	54.4837
Chr2:159803853-159819078	2	159803853	159819078	38.866	51.4683	70.7146	34.8509	73.7169
Chr2:159950069-159968715	2	159950069	159968715	31.3222	22.8839	30.1102	7.22802	38.5502
Chr2:159968891-159984681	2	159968891	159984681	19.9208	23.8805	23.7929	3.67424	23.595
Chr2:162472540-162485837	2	162472540	162485837	27.7285	58.2112	48.0394	61.8573	89.5858
Chr2:162882463-162891388	2	162882463	162891388	39.6096	56.4364	59.0968	35.2261	74.8356
Chr2:162899079-162906110	2	162899079	162906110	41.4561	30.8542	46.0896	11.1035	52.5596
Chr2:163177509-163187100	2	163177509	163187100	6.31902	16.8237	12.2826	0.543478	6.8625
Chr2:163514965-163523675	2	163514965	163523675	59.0588	21.8404	55.8006	14.0253	73.0842
Chr2:164300859-164312310	2	164300859	164312310	72.8081	39.8233	89.2238	14.18	86.9881
Chr2:164312313-164325428	2	164312313	164325428	61.4415	40.5972	88.1422	14.4498	75.8913
Chr2:164326091-164337734	2	164326091	164337734	20.036	19.2499	37.9791	7.63177	27.6677
Chr2:166258555-166265207	2	166258555	166265207	8.292	12.671	17.5161	1.9902	10.2822
Chr2:166354152-166360592	2	166354152	166360592	22.9497	23.6816	30.6495	5.40709	28.3568
Chr2:166360622-166366521	2	166360622	166366521	46.0836	38.2861	38.5995	4.81752	50.9011
Chr2:166366704-166375650	2	166366704	166375650	52.1804	44.0304	61.2314	10.0774	62.2578
Chr2:166375670-166382950	2	166375670	166382950	42.4337	43.5654	52.219	6.93343	49.3671
Chr2:166383049-166390928	2	166383049	166390928	30.6181	69.4039	79.093	46.8736	77.4916
Chr2:169320952-169330785	2	169320952	169330785	41.6249	22.4961	55.8992	8.36035	49.9852
Chr2:169330867-169340014	2	169330867	169340014	19.1656	15.4753	36.2907	8.30494	27.4705
Chr2:170568205-170577078	2	170568205	170577078	23.5127	24.97	39.2795	4.88925	28.402
Chr2:170584783-170592043	2	170584783	170592043	26.2871	74.0359	85.4843	63.1742	89.4613
Chr2:171016852-171027623	2	171016852	171027623	52.1625	19.2159	30.6247	9.99663	62.1591
Chr2:171027662-171038880	2	171027662	171038880	65.6069	25.9779	30.0559	6.94981	72.5567
Chr2:171038970-171048279	2	171038970	171048279	50.7362	17.322	30.2508	5.72159	56.4578
Chr2:171048517-171059256	2	171048517	171059256	49.3156	22.8685	24.2885	5.3515	54.6671
Chr2:171752243-171760047	2	171752243	171760047	15.89	20.8561	14.8111	6.6831	22.5731
Chr2:171760226-171770757	2	171760226	171770757	36.3351	16.1765	11.7161	5.94558	42.2807
Chr2:171893112-171903380	2	171893112	171903380	30.9644	32.4358	35.9832	19.7767	50.741
Chr2:173066560-173073044	2	173066560	173073044	39.9688	53.7177	69.1469	28.5589	68.5277
Chr2:173073060-173080614	2	173073060	173080614	37.9191	23.9157	56.3695	9.95632	47.8754
Chr2:173232572-173238524	2	173232572	173238524	30.2718	51.2854	60.1333	17.6734	47.9452
Chr2:173280534-173287140	2	173280534	173287140	10.8849	15.9389	28.5056	4.20331	15.0882
Chr2:173287149-173294721	2	173287149	173294721	17.4854	22.1008	36.3682	4.46288	21.9483
Chr2:173294971-173301455	2	173294971	173301455	66.6853	18.5689	79.983	8.09159	74.7769
Chr2:173495510-173507123	2	173495510	173507123	27.7004	22.782	26.0934	4.01937	31.7197
Chr2:173849298-173857111	2	173849298	173857111	19.4582	15.8986	23.5174	6.48227	25.9405
Chr2:173940270-173949960	2	173940270	173949960	31.6838	49.7594	73.4141	36.0884	67.7722
Chr2:173969939-173981137	2	173969939	173981137	24.2608	31.7788	51.1637	15.5978	39.8587
Chr2:173981236-173991580	2	173981236	173991580	46.5627	18.4744	60.8446	6.07616	52.6388
Chr2:173991630-174000526	2	173991630	174000526	48.7545	18.9033	57.8188	7.88573	56.6402
Chr2:174050799-174059540	2	174050799	174059540	35.795	13.7733	49.1542	3.38639	39.1814
Chr2:174059616-174070881	2	174059616	174070881	36.1136	19.6633	46.8767	6.3359	42.4495
Chr2:174578033-174591114	2	174578033	174591114	15.2954	14.8738	17.4761	6.58554	21.881
Chr2:174599519-174607381	2	174599519	174607381	73.9944	35.3795	63.7511	9.53905	83.5335
Chr2:174607687-174618128	2	174607687	174618128	77.3429	29.0814	64.0467	15.4106	92.7536
Chr2:174618194-174626481	2	174618194	174626481	78.3413	22.5504	66.8192	16.4228	94.7641
Chr2:174626513-174636528	2	174626513	174636528	82.8883	28.7727	63.9624	12.7797	95.668
Chr2:174636635-174646104	2	174636635	174646104	87.9517	25.1523	63.3783	7.94965	95.9014
Chr2:174646128-174657824	2	174646128	174657824	78.8739	16.9119	65.3754	11.0108	89.8848
Chr2:174657835-174666676	2	174657835	174666676	77.0157	16.4649	47.8699	10.2929	87.3085
Chr2:174666728-174673777	2	174666728	174673777	84.2254	12.0758	49.1646	6.90818	91.1335
Chr2:174673788-174680785	2	174673788	174680785	84.744	13.5512	43.0119	5.59866	90.3426
Chr2:174680885-174689605	2	174680885	174689605	81.4774	24.4895	64.0078	9.5033	90.9807
Chr2:174689681-174701462	2	174689681	174701462	82.4893	24.8912	70.9093	10.3339	92.8232
Chr2:174701465-174707355	2	174701465	174707355	66.2857	27.8749	75.3642	25.2118	91.4975
Chr2:174786198-174802270	2	174786198	174802270	55.5621	25.4358	58.3745	8.05859	63.6207
Chr2:174802338-174815784	2	174802338	174815784	77.2044	17.2891	79.5506	7.44239	84.6468
Chr2:174815787-174826520	2	174815787	174826520	72.0362	16.8494	73.1509	4.26512	76.3013
Chr2:174826559-174834348	2	174826559	174834348	47.1265	19.7184	52.0146	7.21218	54.3387
Chr2:178460080-178470019	2	178460080	178470019	44.6006	24.7336	43.1178	4.82689	49.4275
Chr2:178470030-178478161	2	178470030	178478161	78.7452	16.4361	78.0458	8.85275	87.5979
Chr2:178478391-178490215	2	178478391	178490215	72.312	13.8303	67.105	4.42507	76.7371
Chr2:178558449-178567708	2	178558449	178567708	22.2501	15.6041	27.1916	8.64425	30.8944
Chr2:178567803-178577166	2	178567803	178577166	32.9845	20.9091	31.6264	6.62433	39.6089
Chr2:178577169-178583790	2	178577169	178583790	20.9694	21.8673	25.9315	7.8121	28.7815
Chr2:178583809-178594758	2	178583809	178594758	15.6992	20.2003	22.6835	6.3719	22.0711
Chr2:178646429-178657449	2	178646429	178657449	15.6437	16.1707	13.8411	5.26031	20.904
Chr2:178657452-178668568	2	178657452	178668568	26.8591	23.5357	22.3849	8.30245	35.1615
Chr2:178668654-178677211	2	178668654	178677211	42.8115	26.1077	12.4228	16.5784	59.3899
Chr2:181787209-181804027	2	181787209	181804027	30.5238	39.9944	30.7858	30.1023	60.6261
Chr3:5242896-5255605	3	5242896	5255605	28.1456	47.7547	40.9508	15.9712	44.1169
Chr3:5403460-5418102	3	5403460	5418102	21.5255	36.2706	29.1435	13.6433	35.1688
Chr3:8030600-8052436	3	8030600	8052436	22.4528	23.5876	50.3496	7.97312	30.4259
Chr3:8081008-8105373	3	8081008	8105373	21.8613	73.934	90.4114	73.5334	95.3947
Chr3:9314465-9322703	3	9314465	9322703	38.9026	76.2349	90.7471	49.5095	88.4121
Chr3:9323025-9331352	3	9323025	9331352	33.8656	55.6633	66.9674	25.7522	59.6178
Chr3:10079965-10088243	3	10079965	10088243	32.112	27.6436	32.9009	5.65571	37.7677
Chr3:12625088-12646560	3	12625088	12646560	41.4701	48.6395	54.9021	33.3461	74.8162
Chr3:15297761-15310345	3	15297761	15310345	54.467	63.1992	74.326	31.756	86.223
Chr3:15310408-15335023	3	15310408	15335023	46.5172	47.7172	71.9638	24.7997	71.3169
Chr3:15335034-15358754	3	15335034	15358754	41.1711	34.1986	53.03	18.9952	60.1662
Chr3:15358904-15387954	3	15358904	15387954	39.4464	50.709	68.0071	29.0888	68.5352
Chr3:15387975-15407761	3	15387975	15407761	30.8713	62.1698	66.2405	41.4829	72.3542
Chr3:15407931-15435368	3	15407931	15435368	52.1126	33.8442	50.2796	18.1697	70.2823
Chr3:15435381-15458557	3	15435381	15458557	37.5601	45.8518	74.4666	35.0874	72.6475
Chr3:15525614-15548765	3	15525614	15548765	41.3287	35.4071	58.1595	19.4594	60.7881
Chr3:15548787-15577444	3	15548787	15577444	41.1117	50.6763	61.2565	27.3221	68.4338
Chr3:17814367-17831014	3	17814367	17831014	22.8509	24.8582	28.3859	10.5481	33.3991
Chr3:18290641-18306084	3	18290641	18306084	50.7592	31.0773	38.9885	13.3307	64.0898
Chr3:18353861-18369390	3	18353861	18369390	29.0258	27.1369	27.5819	5.35747	34.3833
Chr3:19002825-19017435	3	19002825	19017435	22.9521	35.3762	25.3509	7.90003	30.8521
Chr3:20820814-20834417	3	20820814	20834417	17.9431	29.655	40.7448	5.62596	23.569
Chr3:21531020-21546374	3	21531020	21546374	61.433	35.8874	54.4927	17.8072	79.2401
Chr3:21565052-21586114	3	21565052	21586114	26.9495	60.8212	71.2302	54.547	81.4965
Chr3:26031606-26052288	3	26031606	26052288	20.1948	77.3657	88.7809	76.9145	97.1093
Chr3:26321465-26331773	3	26321465	26331773	8.69069	8.07384	6.80084	1.19634	9.88703
Chr3:28727977-28742744	3	28727977	28742744	34.771	34.4731	33.1182	15.2047	49.9757
Chr3:28755083-28765331	3	28755083	28765331	28.3614	58.5134	42.2205	29.3312	57.6926
Chr3:29744097-29759821	3	29744097	29759821	22.0434	27.1819	33.5465	6.41758	28.461
Chr3:31229015-31237646	3	31229015	31237646	18.4171	20.2406	25.4555	4.29526	22.7123
Chr3:32996761-33009687	3	32996761	33009687	18.9643	23.8076	19.6079	7.27384	26.2381
Chr3:33009698-33022619	3	33009698	33022619	19.766	21.9466	20.7017	8.20718	27.9732
Chr3:33022676-33033538	3	33022676	33033538	19.7388	17.6155	18.487	8.15551	27.8944
Chr3:33033784-33045881	3	33033784	33045881	20.6024	13.9592	15.1259	5.50138	26.1038
Chr3:33059798-33072886	3	33059798	33072886	54.5452	25.5526	27.4722	23.5589	78.1041
Chr3:33072943-33086089	3	33072943	33086089	46.8283	33.1115	29.7938	25.8138	72.6422
Chr3:33097326-33111862	3	33097326	33111862	26.1265	19.1715	27.1786	12.5157	38.6422
Chr3:33282613-33300251	3	33282613	33300251	24.1991	56.5881	81.5508	44.1167	68.3157
Chr3:33600956-33611291	3	33600956	33611291	38.3587	19.5086	49.3078	19.7146	58.0733
Chr3:33623173-33638450	3	33623173	33638450	50.3741	40.8842	60.4199	17.7185	68.0926
Chr3:33661686-33687865	3	33661686	33687865	37.8356	43.0105	72.9093	28.0799	65.9156
Chr3:33958089-33967464	3	33958089	33967464	57.2176	18.7969	37.6848	4.64541	61.863
Chr3:33967480-33975845	3	33967480	33975845	48.9881	31	37.5744	6.7254	55.7135
Chr3:34872412-34881932	3	34872412	34881932	22.7526	30.135	41.6561	11.0199	33.7724
Chr3:34890428-34897590	3	34890428	34897590	13.8514	25.6269	22.4394	4.08817	17.9396
Chr3:34904393-34913018	3	34904393	34913018	55.3928	25.6397	84.0911	21.1544	76.5472
Chr3:34913080-34922492	3	34913080	34922492	59.4893	43.6456	81.6372	16.2108	75.7001
Chr3:34922511-34932452	3	34922511	34932452	16.7015	19.979	27.1229	3.741	20.4425
Chr3:34932469-34947385	3	34932469	34947385	45.8446	26.0268	66.9104	14.96	60.8046
Chr3:35020210-35030612	3	35020210	35030612	52.4002	51.2112	78.3928	31.5299	83.93
Chr3:35030681-35041027	3	35030681	35041027	60.377	54.2217	81.2782	32.0737	92.4507
Chr3:35041448-35053622	3	35041448	35053622	61.2827	60.8077	86.2337	34.2597	95.5424
Chr3:35053768-35062124	3	35053768	35062124	34.5098	31.2857	44.995	20.4902	55
Chr3:35320631-35329114	3	35320631	35329114	23.3882	23.5549	35.5705	16.2819	39.6701
Chr3:35329202-35339537	3	35329202	35339537	54.3237	47.9414	61.9623	34.9589	89.2826
Chr3:35339639-35348100	3	35339639	35348100	23.7598	69.2137	86.5935	67.9842	91.7439
Chr3:35734584-35747056	3	35734584	35747056	27.4738	15.8482	17.0768	2.24709	29.7209
Chr3:36536636-36551484	3	36536636	36551484	20.2669	30.7989	25.2181	18.4003	38.6672
Chr3:36642354-36651513	3	36642354	36651513	15.8104	24.4038	17.0264	3.94793	19.7583
Chr3:36659182-36670957	3	36659182	36670957	21.1125	30.6992	19.5611	9.26996	30.3824
Chr3:36712084-36724317	3	36712084	36724317	16.7568	35.8146	29.2018	7.59719	24.3539
Chr3:38655441-38663985	3	38655441	38663985	32.8988	18.3363	27.7529	11.2568	44.1556
Chr3:38886175-38887578	3	38886175	38887578	6.01928	4.46263	1.46501	0.0462963	6.06558
Chr3:38964816-38978187	3	38964816	38978187	33.8712	58.2421	62.9054	31.1814	65.0526
Chr3:39835321-39847736	3	39835321	39847736	26.3999	72.1543	89.9856	55.0655	81.4654
Chr3:41470799-41477977	3	41470799	41477977	16.7632	18.5126	26.599	7.5734	24.3366
Chr3:41478102-41487138	3	41478102	41487138	15.0762	21.493	24.8574	4.97154	20.0478
Chr3:41487267-41496785	3	41487267	41496785	11.6076	23.0379	9.84595	3.40278	15.0103
Chr3:49029579-49048230	3	49029579	49048230	61.3925	23.0233	72.5257	26.3717	87.7642
Chr3:49066742-49080998	3	49066742	49080998	37.8401	57.8089	78.6732	32.7653	70.6055
Chr3:49119784-49137810	3	49119784	49137810	35.1446	67.9058	85.327	59.3138	94.4583
Chr3:49137873-49157947	3	49137873	49157947	45.0554	57.5977	87.9091	50.4976	95.553
Chr3:49158350-49165746	3	49158350	49165746	26.5653	75.7899	89.0002	63.832	90.3973
Chr3:49593322-49607304	3	49593322	49607304	44.0501	52.9077	77.9076	31.9561	76.0062
Chr3:50702706-50715753	3	50702706	50715753	16.8105	29.7689	27.6227	7.74887	24.5594
Chr3:52515965-52523056	3	52515965	52523056	30.5377	72.1906	54.7847	54.785	85.3227
Chr3:52533106-52541843	3	52533106	52541843	12.0601	18.3742	18.8509	3.16195	15.222
Chr3:52542035-52551172	3	52542035	52551172	31.351	38.8536	19.1193	10.8487	42.1997
Chr3:52895789-52905532	3	52895789	52905532	24.0844	28.1697	22.2032	6.05552	30.1399
Chr3:54369708-54381771	3	54369708	54381771	38.8347	36.5906	35.959	12.5356	51.3704
Chr3:54382454-54397543	3	54382454	54397543	33.6182	38.3616	48.2978	19.1629	52.7811
Chr3:54563043-54572536	3	54563043	54572536	30.0804	46.5858	74.3484	31.1519	61.2323
Chr3:55285792-55297237	3	55285792	55297237	44.8385	66.6326	83.6412	44.6397	89.4782
Chr3:55381929-55395236	3	55381929	55395236	37.1371	24.1676	45.6332	6.40528	43.5424
Chr3:55395247-55405631	3	55395247	55405631	27.8481	19.1631	40.2755	4.49394	32.342
Chr3:55973739-55985711	3	55973739	55985711	31.0718	64.205	50.648	43.5993	74.6712
Chr3:56259138-56277066	3	56259138	56277066	37.5175	34.0587	37.9146	6.94341	44.4609
Chr3:56444809-56464669	3	56444809	56464669	18.913	20.338	19.1893	10.279	29.192
Chr3:57581694-57594122	3	57581694	57594122	30.3921	34.5421	67.703	21.736	52.1281
Chr3:57871668-57887577	3	57871668	57887577	34.83	42.2119	68.7479	21.3047	56.1346
Chr3:58810607-58820340	3	58810607	58820340	25.913	24.5065	36.5569	8.52203	34.435
Chr3:60859892-60877431	3	60859892	60877431	28.7813	44.063	43.2061	23.0539	51.8352
Chr3:60877448-60889902	3	60877448	60889902	28.1973	34.758	22.995	9.60691	37.8042
Chr3:60927864-60953289	3	60927864	60953289	21.7519	30.4836	28.6916	10.4006	32.1526
Chr3:60990905-61002918	3	60990905	61002918	32.6118	11.289	17.0273	16.251	48.8629
Chr3:61002919-61006374	3	61002919	61006374	59.9821	11.3761	32.9666	6.03685	66.019
Chr3:61006574-61025619	3	61006574	61025619	43.7247	66.4695	83.043	47.8971	91.6218
Chr3:65608769-65617603	3	65608769	65617603	36.1551	38.1105	33.2881	24.3745	60.5296
Chr3:65901655-65914939	3	65901655	65914939	12.7976	14.5485	17.3932	5.71931	18.5169
Chr3:66468335-66488806	3	66468335	66488806	23.4137	78.4765	85.6825	64.75	88.1637
Chr3:66516068-66533396	3	66516068	66533396	17.0345	83.0893	85.3947	79.072	96.1064
Chr3:66695713-66710802	3	66695713	66710802	23.2007	41.0628	20.684	9.00058	32.2013
Chr3:67923404-67937361	3	67923404	67937361	16.9395	16.5075	20.1633	2.20292	19.1424
Chr3:68837852-68846263	3	68837852	68846263	17.4329	27.999	31.8048	9.0176	26.4505
Chr3:69214063-69224556	3	69214063	69224556	27.2268	27.501	44.1811	6.11014	33.3369
Chr3:69688777-69703023	3	69688777	69703023	22.3323	17.6585	22.919	8.02965	30.362
Chr3:69854705-69861257	3	69854705	69861257	26.3412	10.8969	25.8477	10.2253	36.5666
Chr3:69861262-69870578	3	69861262	69870578	27.8607	44.4312	57.8611	40.3712	68.2319
Chr3:69951486-69964014	3	69951486	69964014	50.5169	55.2835	60.7514	31.1586	81.6755
Chr3:70240549-70258431	3	70240549	70258431	26.4181	65.6233	84.8837	55.9122	82.3303
Chr3:77105278-77126513	3	77105278	77126513	28.07	61.4385	35.246	45.9464	74.0164
Chr3:78365364-78384419	3	78365364	78384419	28.5687	29.83	23.95	11.1744	39.743
Chr3:78384571-78405730	3	78384571	78405730	29.3161	23.5737	25.0517	10.8794	40.1954
Chr3:78555846-78559681	3	78555846	78559681	29.7395	84.7211	87.769	53.1029	82.8425
Chr3:78796103-78812496	3	78796103	78812496	30.9112	23.5585	38.1998	7.44155	38.3528
Chr3:79672212-79680092	3	79672212	79680092	15.3153	30.3092	19.0123	3.95755	19.2728
Chr3:81118635-81138919	3	81118635	81138919	46.1436	56.4242	65.9034	28.2971	74.4408
Chr3:81915717-81926095	3	81915717	81926095	20.5936	16.1628	35.7672	6.64563	27.2392
Chr3:85145363-85158880	3	85145363	85158880	18.4995	10.5444	13.2978	6.57847	25.0779
Chr3:85158900-85168799	3	85158900	85168799	75.8472	21.3673	26.6741	9.8797	85.727
Chr3:85168920-85176124	3	85168920	85176124	72.0444	16.1989	17.075	5.18187	77.2262
Chr3:86920963-86926766	3	86920963	86926766	5.46575	17.6103	16.6997	0.431034	5.89678
Chr3:88758040-88763802	3	88758040	88763802	13.5095	92.5968	88.2072	82.3987	95.9082
Chr3:91908392-91934176	3	91908392	91934176	47.4179	29.224	75.9138	20.636	68.0539
Chr3:92738522-92767239	3	92738522	92767239	31.0571	36.0298	41.2046	14.1398	45.1969
Chr3:95683076-95687940	3	95683076	95687940	29.0964	45.7827	50.7576	23.1574	52.2537
Chr3:96680110-96685031	3	96680110	96685031	28.5131	33.8016	21.3448	35.9313	64.4444
Chr3:97188674-97196913	3	97188674	97196913	12.7232	9.28386	13.2801	1.97621	14.6994
Chr3:100341715-100360454	3	100341715	100360454	42.5106	38.538	64.9056	24.9214	67.432
Chr3:100426553-100437573	3	100426553	100437573	29.5172	61.58	80.7802	44.8183	74.3355
Chr3:101119298-101130771	3	101119298	101130771	35.4183	36.825	76.7439	15.6243	51.0426
Chr3:101130795-101139824	3	101130795	101139824	24.2908	24.9478	50.002	14.5886	38.8793
Chr3:101766439-101779516	3	101766439	101779516	22.1512	28.2495	22.6293	5.05148	27.2027
Chr3:101863133-101874638	3	101863133	101874638	48.0048	18.3698	26.4052	10.9559	58.9607
Chr3:101874794-101882423	3	101874794	101882423	50.6518	26.4568	22.2912	10.6942	61.346
Chr3:101882663-101889141	3	101882663	101889141	63.4681	26.5235	24.8215	9.16667	72.6348
Chr3:101889194-101897772	3	101889194	101897772	63.3208	17.1944	7.33496	9.38551	72.7064
Chr3:101897776-101906382	3	101897776	101906382	54.5348	15.2647	23.0135	8.61717	63.1519
Chr3:101906487-101913679	3	101906487	101913679	21.8793	16.7332	20.0277	10.238	32.1173
Chr3:102935588-102940944	3	102935588	102940944	7.39271	15.3288	18.8775	0.748525	8.14123
Chr3:105215683-105226817	3	105215683	105226817	29.5874	32.4159	46.7071	22.6312	52.2185
Chr3:105307736-105323768	3	105307736	105323768	39.8553	35.1495	30.7064	20.0814	59.9366
Chr3:105361703-105372797	3	105361703	105372797	9.77211	22.5948	15.8201	2.9956	12.7677
Chr3:106858583-106879308	3	106858583	106879308	32.7784	43.3931	63.7674	25.683	58.4614
Chr3:106879705-106897914	3	106879705	106897914	40.4347	42.1954	73.8315	18.4084	58.8431
Chr3:106898076-106919747	3	106898076	106919747	39.7899	70.3446	88.3619	52.3116	92.1014
Chr3:106919892-106930667	3	106919892	106930667	47.1827	57.5898	87.1526	35.6939	82.8766
Chr3:106931271-106959241	3	106931271	106959241	29.5792	62.8141	91.544	65.6257	95.2049
Chr3:106959721-106979932	3	106959721	106979932	39.4777	61.7066	74.5505	34.4407	73.9184
Chr3:107968185-107979713	3	107968185	107979713	35.3645	22.4078	42.1084	8.91452	44.279
Chr3:114908405-114926044	3	114908405	114926044	28.3996	19.3984	17.611	5.51046	33.91
Chr3:115443081-115463664	3	115443081	115463664	49.8569	27.8861	64.1455	13.3047	63.1616
Chr3:117575411-117582105	3	117575411	117582105	34.2421	22.1422	34.1908	18.9013	53.1434
Chr3:119837540-119848011	3	119837540	119848011	27.9026	10.3055	22.1844	2.78201	30.6846
Chr3:121091705-121100226	3	121091705	121100226	17.0618	20.1913	9.28533	1.5407	18.6025
Chr3:121100238-121106898	3	121100238	121106898	19.4717	9.00385	11.4332	2.63981	22.1115
Chr3:121106964-121115901	3	121106964	121115901	24.2607	12.7035	14.9749	3.57652	27.8372
Chr3:121115915-121125046	3	121115915	121125046	50.541	32.4792	54.0163	24.8603	75.4013
Chr3:121125099-121134173	3	121125099	121134173	47.8422	22.5458	41.8084	8.79519	56.6373
Chr3:121206312-121211361	3	121206312	121211361	23.5755	47.9984	42.6688	19.2886	42.8642
Chr3:121211437-121223857	3	121211437	121223857	38.2006	42.7525	54.107	20.7802	58.9808
Chr3:121551936-121559001	3	121551936	121559001	33.4245	54.3828	80.918	43.386	76.8105
Chr3:122746029-122761431	3	122746029	122761431	33.5557	30.9729	10.9451	4.74822	38.3039
Chr3:122761434-122771264	3	122761434	122771264	16.1838	22.9536	11.9707	2.70327	18.887
Chr3:122771342-122780471	3	122771342	122780471	32.1151	21.3392	20.711	4.27528	36.3904
Chr3:122780881-122794505	3	122780881	122794505	35.7658	24.2382	23.6265	16.4083	52.1741
Chr3:122794612-122802057	3	122794612	122802057	32.5853	19.6375	14.5192	4.6234	37.2086
Chr3:125676936-125690529	3	125676936	125690529	13.2443	23.4287	12.8984	2.6331	15.8774
Chr3:126596915-126597923	3	126596915	126597923	2.32909	1.48585	1.2607	0	2.32909
Chr3:126922435-126932136	3	126922435	126932136	43.5063	47.3231	80.8549	45.6592	89.1654
Chr3:126932280-126941646	3	126932280	126941646	33.6142	55.318	82.4836	51.9033	85.5175
Chr3:126941703-126946070	3	126941703	126946070	46.0148	28.8063	55.1357	8.2414	54.2562
Chr3:126946078-126953805	3	126946078	126953805	44.5802	29	80.0799	27.8123	72.3925
Chr3:126953958-126964870	3	126953958	126964870	40.3366	37.8741	62.4871	26.9851	67.3216
Chr3:126975618-126982989	3	126975618	126982989	48.7239	40.8103	68.9082	20.1757	68.8996
Chr3:126983029-126996316	3	126983029	126996316	46.5543	32.1451	69.7454	17.0762	63.6305
Chr3:127675177-127683515	3	127675177	127683515	23.8251	32.352	18.0078	6.50685	30.3319
Chr3:127683571-127694606	3	127683571	127694606	24.8052	21.1578	19.092	4.15696	28.9621
Chr3:129297410-129306639	3	129297410	129306639	18.892	27.5438	14.5037	8.5086	27.4006
Chr3:129306824-129315544	3	129306824	129315544	17.5846	9.31441	19.3897	5.95086	23.5354
Chr3:129560770-129569509	3	129560770	129569509	34.0078	42.9399	78.6212	30.8914	64.8991
Chr3:129569514-129576651	3	129569514	129576651	41.4323	47.6431	75.584	32.2336	73.6659
Chr3:131013257-131018730	3	131013257	131018730	31.0129	13.9604	23.3326	6.39781	37.4107
Chr3:131904074-131913114	3	131904074	131913114	24.9149	15.0874	19.6522	4.59087	29.5058
Chr3:132358140-132378646	3	132358140	132378646	33.3487	55.9447	76.0908	21.8476	55.1964
Chr3:133997879-134009833	3	133997879	134009833	29.4761	20.3981	32.2011	3.78585	33.262
Chr3:134050111-134083203	3	134050111	134083203	47.5725	51.8981	77.4039	37.1418	84.7143
Chr3:134118070-134134769	3	134118070	134134769	20.5048	17.2153	22.7589	5.06046	25.5653
Chr3:137457508-137477065	3	137457508	137477065	31.891	35.7241	59.5714	15.9115	47.8025
Chr3:137498183-137517442	3	137498183	137517442	40.0443	44.6668	69.1116	17.887	57.9313
Chr3:137517690-137535133	3	137517690	137535133	38.767	28.6903	51.9859	14.9212	53.6881
Chr3:138218569-138225203	3	138218569	138225203	21.293	24.251	27.4615	10.7468	32.0398
Chr3:138396433-138406011	3	138396433	138406011	43.7483	37.8593	52.5886	23.8876	67.6359
Chr3:138406086-138417755	3	138406086	138417755	35.3857	68.211	77.0618	48.8596	84.2452
Chr3:140703063-140726424	3	140703063	140726424	56.5767	48.6813	82.8373	33.3758	89.9526
Chr3:140726431-140741675	3	140726431	140741675	36.7712	35.0319	66.0975	26.8367	63.6079
Chr3:140970621-140990900	3	140970621	140990900	16.1978	20.8468	25.0926	4.19823	20.3961
Chr3:142958228-142966895	3	142958228	142966895	43.9291	52.5533	69.1316	44.8678	88.7969
Chr3:144139586-144149351	3	144139586	144149351	48.7436	21.6876	22.4099	2.10963	50.8533
Chr3:144149355-144158546	3	144149355	144158546	20.8657	19.0704	17.1577	5.83003	26.6958
Chr3:144185609-144190995	3	144185609	144190995	23.3129	26.2737	29.4409	9.84905	33.1619
Chr3:144190998-144196963	3	144190998	144196963	48.0899	21.8829	28.9625	20.6884	68.7783
Chr3:144225685-144232502	3	144225685	144232502	32.9383	34.4975	17.5003	5.00327	37.9415
Chr3:144232552-144238734	3	144232552	144238734	29.5766	36.5102	19.8473	14.7708	44.3474
Chr3:144341528-144348607	3	144341528	144348607	21.8308	17.518	17.8304	3.58354	25.4144
Chr3:144527694-144540037	3	144527694	144540037	12.2671	89.0118	89.1988	85.9808	98.2479
Chr3:146033040-146038732	3	146033040	146038732	20.2255	11.643	11.0964	4.8125	25.038
Chr3:146038788-146043084	3	146038788	146043084	31.1507	19.859	27.8033	8.92006	40.0708
Chr3:146541140-146555117	3	146541140	146555117	37.1751	15.5717	56.0135	5.165	42.3401
Chr3:146555134-146564957	3	146555134	146564957	17.7998	11.9103	24.3501	3.24964	21.0494
Chr3:146564983-146574011	3	146564983	146574011	8.87089	20.614	19.5956	2.62106	11.492
Chr3:146944035-146951532	3	146944035	146951532	32.9057	78.9832	83.1488	53.9228	86.8285
Chr3:146960607-146971938	3	146960607	146971938	31.6228	87.9175	91.7868	60.5368	92.1597
Chr3:147462276-147487691	3	147462276	147487691	24.7991	32.5734	30	13.9109	38.71
Chr3:147487778-147511248	3	147487778	147511248	70.9721	18.8102	40.9913	13.5118	84.4839
Chr3:147968473-147976579	3	147968473	147976579	14.6877	25.7375	24.2739	3.64621	18.3339
Chr3:147976672-147985484	3	147976672	147985484	35.2057	46.6178	52.226	34.8286	70.0343
Chr3:148631979-148640631	3	148631979	148640631	64.0564	32.2633	76.2818	19.6519	83.7083
Chr3:148640903-148649778	3	148640903	148649778	84.2267	23.2337	76.5819	10.0345	94.2612
Chr3:148649897-148658861	3	148649897	148658861	62.7426	55.3557	77.0146	24.5994	87.3419
Chr3:148658934-148671281	3	148658934	148671281	33.911	63.1492	75.5717	43.559	77.4699
Chr3:148695270-148707817	3	148695270	148707817	67.6218	14.953	61.8529	5.98485	73.6066
Chr3:148716103-148729699	3	148716103	148729699	32.1214	57.2245	65.1355	33.3088	65.4302
Chr3:148729721-148739447	3	148729721	148739447	43.1266	51.5414	63.9684	25.4179	68.5445
Chr3:148822142-148827642	3	148822142	148827642	32.5439	85.3078	76.5618	64.3797	96.9236
Chr3:148835303-148839219	3	148835303	148839219	35.9265	83.0025	70.6522	59.3969	95.3234
Chr3:148839252-148849315	3	148839252	148849315	25.9377	86.6259	76.8407	68.8858	94.8235
Chr3:148849506-148856286	3	148849506	148856286	19.0244	78.145	79.3258	75.9907	95.0151
Chr3:148887510-148895265	3	148887510	148895265	41.6014	74.9825	65.2883	38.3981	79.9995
Chr3:148895306-148901913	3	148895306	148901913	33.7551	83.1994	70.6869	57.7324	91.4875
Chr3:149103110-149111555	3	149103110	149111555	21.9477	18.3099	33.8077	4.90921	26.857
Chr3:149396516-149406507	3	149396516	149406507	53.4561	39.8114	68.8139	23.0921	76.5481
Chr3:149415977-149425449	3	149415977	149425449	59.4624	31.7802	70.8718	14.1921	73.6545
Chr3:149425495-149434566	3	149425495	149434566	36.0066	26.0537	37.848	5.08425	41.0909
Chr3:149477344-149488427	3	149477344	149488427	23.6276	26.2066	24.701	5.00986	28.6375
Chr3:149488697-149502993	3	149488697	149502993	70.0469	16.5048	77.6002	8.73369	78.7806
Chr3:149503212-149512455	3	149503212	149512455	31.6341	20.3474	48.2829	7.24932	38.8834
Chr3:150683787-150702564	3	150683787	150702564	42.922	31.4049	25.3641	6.42434	49.3464
Chr3:152058877-152067665	3	152058877	152067665	21.3264	17.0028	13.0293	2.17503	23.5014
Chr3:152067784-152076008	3	152067784	152076008	21.4053	12.7536	21.4492	3.34077	24.746
Chr3:152991688-153000871	3	152991688	153000871	13.6799	18.2614	19.5406	4.06498	17.7449
Chr3:153012117-153019766	3	153012117	153019766	30.4551	25.8844	43.1901	7.38896	37.8441
Chr3:154815577-154826009	3	154815577	154826009	21.9869	12.5567	26.5493	4.16073	26.1477
Chr3:157190413-157208604	3	157190413	157208604	29.1232	20.9271	34.8239	8.76344	37.8866
Chr3:157921854-157929285	3	157921854	157929285	7.57514	10.3804	14.8202	2.0151	9.59023
Chr4:4102206-4121321	4	4102206	4121321	36.7187	57.3451	65.8624	22.4808	59.1996
Chr4:6786891-6801816	4	6786891	6801816	28.4902	69.746	74.4596	58.9243	87.4146
Chr4:7147272-7165784	4	7147272	7165784	34.3114	31.2821	29.8637	15.9051	50.2165
Chr4:8458801-8472353	4	8458801	8472353	25.7682	73.6258	87.0763	60.6057	86.3739
Chr4:8472364-8485728	4	8472364	8485728	49.296	46.0411	77.6756	30.7683	80.0642
Chr4:9485650-9496855	4	9485650	9496855	31.2513	45.9443	58.1895	25.2144	56.4658
Chr4:10928381-10939335	4	10928381	10939335	17.3008	19.2075	32.4902	5.76406	23.0649
Chr4:11724846-11735288	4	11724846	11735288	26.827	19.9006	20.4073	6.51923	33.3462
Chr4:12578866-12595407	4	12578866	12595407	37.7556	31.8216	57.7544	20.184	57.9396
Chr4:12595492-12606142	4	12595492	12606142	64.56	27.7342	61.505	9.22749	73.7875
Chr4:12626142-12644989	4	12626142	12644989	33.3065	68.1783	93.544	57.9268	91.2333
Chr4:12645008-12662827	4	12645008	12662827	47.6845	42.556	76.8487	36.2849	83.9693
Chr4:12663397-12687036	4	12663397	12687036	25.3643	22.9035	46.8343	12.1088	37.4731
Chr4:15149764-15169291	4	15149764	15169291	17.9028	18.544	29.896	6.35875	24.2615
Chr4:15316014-15328428	4	15316014	15328428	35.0893	24.5833	50.7317	17.4387	52.5281
Chr4:15831354-15850563	4	15831354	15850563	30.4382	75.1422	79.4624	63.4128	93.8509
Chr4:15883097-15899250	4	15883097	15899250	22.7965	86.9444	80.6976	71.8399	94.6364
Chr4:16924000-16951807	4	16924000	16951807	31.2069	63.9086	73.2848	50.0973	81.3042
Chr4:17171556-17184681	4	17171556	17184681	47.3134	42.9208	75.6344	20.0721	67.3855
Chr4:18703673-18715602	4	18703673	18715602	38.1675	61.2204	70.6455	38.2322	76.3997
Chr4:19992575-20007875	4	19992575	20007875	17.4718	31.474	27.3485	4.00152	21.4733
Chr4:20546693-20568025	4	20546693	20568025	31.385	41.6681	24.5773	12.418	43.803
Chr4:20568040-20589626	4	20568040	20589626	21.355	33.9208	38.6867	11.2905	32.6455
Chr4:21158948-21179213	4	21158948	21179213	22.582	30.0812	22.5833	9.52029	32.1023
Chr4:22263414-22276773	4	22263414	22276773	43.4948	37.2738	25.0472	20.4852	63.98
Chr4:22294453-22312371	4	22294453	22312371	53.5495	58.6642	38.6174	32.1205	85.67
Chr4:22312595-22324470	4	22312595	22324470	36.1558	72.1405	51.0791	49.1813	85.3371
Chr4:31239433-31256033	4	31239433	31256033	25.1844	36.0795	36.2965	13	38.1844
Chr4:31906808-31915587	4	31906808	31915587	30.5111	49.9905	70.0344	44.6412	75.1523
Chr4:33755610-33766448	4	33755610	33766448	21.2062	23.0844	23.3339	4.26179	25.468
Chr4:34227788-34236874	4	34227788	34236874	29.9687	24.7123	43.176	7.73115	37.6998
Chr4:34402191-34412633	4	34402191	34412633	36.1501	65.2104	50.4656	35.1364	71.2865
Chr4:35099404-35105460	4	35099404	35105460	27.0616	32.9423	34.4685	9.28287	36.3444
Chr4:35105516-35114004	4	35105516	35114004	39.3466	33.825	65.145	17.4247	56.7713
Chr4:35114109-35123094	4	35114109	35123094	20.4978	18.9187	31.0087	11.3694	31.8672
Chr4:35123250-35130390	4	35123250	35130390	19.9885	18.7467	26.3321	2.81084	22.7993
Chr4:39463237-39483110	4	39463237	39483110	16.6483	31.0308	32.776	4.85058	21.4988
Chr4:39483184-39502415	4	39483184	39502415	35.901	27.3441	67.6334	20.5959	56.497
Chr4:39502594-39524892	4	39502594	39524892	45.9242	43.3369	54.234	25.284	71.2082
Chr4:39524901-39541590	4	39524901	39541590	43.7531	26.1263	61.5513	14.9561	58.7093
Chr4:39825394-39846737	4	39825394	39846737	23.5485	23.7805	19.3005	8.91748	32.466
Chr4:39860321-39878031	4	39860321	39878031	38.0116	19.3499	32.6495	11.2899	49.3016
Chr4:40472462-40477777	4	40472462	40477777	69.2783	5.91471	16.2142	4.11408	73.3924
Chr4:41597641-41605390	4	41597641	41605390	24.827	49.7161	37.9746	20.806	45.633
Chr4:44236636-44247348	4	44236636	44247348	27.6421	56.4642	61.3197	49.0757	76.7178
Chr4:44247351-44255364	4	44247351	44255364	40.0613	49.4048	71.3865	40.9091	80.9703
Chr4:44522221-44530469	4	44522221	44530469	31.8743	57.6276	65.8631	37.2246	69.0989
Chr4:45408998-45415762	4	45408998	45415762	25.1083	30.188	45.9406	12.3538	37.4621
Chr4:45629174-45639319	4	45629174	45639319	28.5966	41.3496	59.8505	25.0371	53.6337
Chr4:47133994-47142330	4	47133994	47142330	22.5868	17.4185	31.7297	6.11308	28.6999
Chr4:47142415-47152874	4	47142415	47152874	41.4802	27.8883	29.3267	10.2403	51.7205
Chr4:47164276-47176023	4	47164276	47176023	27.5187	24.2074	45.9769	22.0135	49.5322
Chr4:47601350-47610338	4	47601350	47610338	23.0087	77.828	80.1029	71.1511	94.1599
Chr4:47610480-47623048	4	47610480	47623048	29.1489	38.7379	47.6891	19.3059	48.4548
Chr4:47738583-47750345	4	47738583	47750345	32.8353	37.8783	47.0291	13.3019	46.1372
Chr4:50611475-50632324	4	50611475	50632324	34.8897	28.302	21.6925	14.8572	49.7469
Chr4:50632552-50656078	4	50632552	50656078	52.6361	26.6092	29.5652	16.2483	68.8844
Chr4:50656236-50687522	4	50656236	50687522	41.7333	40.6596	33.5305	31.422	73.1553
Chr4:50694169-50706208	4	50694169	50706208	27.8361	33.9472	36.5978	22.3417	50.1778
Chr4:50706253-50716554	4	50706253	50716554	39.597	49.5554	61.592	34.7879	74.3848
Chr4:50716559-50742195	4	50716559	50742195	35.9843	38.9055	26.7714	19.4933	55.4776
Chr4:52343100-52362199	4	52343100	52362199	40.3444	9.64981	27.8438	7.82874	48.1732
Chr4:52362261-52378268	4	52362261	52378268	61.0137	21.0077	26.4705	15.7356	76.7493
Chr4:53266873-53277760	4	53266873	53277760	19.8907	30.7851	30.473	7.11338	27.004
Chr4:53277836-53288105	4	53277836	53288105	47.5924	24.1665	30.6605	2.40584	49.9983
Chr4:53288291-53297450	4	53288291	53297450	46.0301	36.3472	58.016	27.1061	73.1363
Chr4:53311390-53318906	4	53311390	53318906	75.8294	22.7911	78.8938	15.9598	91.7893
Chr4:53318945-53330056	4	53318945	53330056	66.6376	30.82	68.705	20.7347	87.3723
Chr4:53389604-53398646	4	53389604	53398646	37.5427	29.5161	36.0782	6.20377	43.7465
Chr4:53398678-53406722	4	53398678	53406722	30.0163	60.0122	85.1159	45.6277	75.644
Chr4:53989110-54009082	4	53989110	54009082	25.4857	31.7603	58.647	18.4317	43.9173
Chr4:54419773-54433636	4	54419773	54433636	34.0743	53.9776	72.838	45.3368	79.4111
Chr4:54629386-54640069	4	54629386	54640069	12.616	30.0135	31.6448	8.19241	20.8084
Chr4:55112925-55124020	4	55112925	55124020	33.7084	35.2428	43.1231	17.9623	51.6708
Chr4:55124050-55133482	4	55124050	55133482	27.71	65.2095	84.051	58.9844	86.6944
Chr4:56160935-56172977	4	56160935	56172977	16.7322	35.3929	37.7533	11.8452	28.5773
Chr4:56173272-56190483	4	56173272	56190483	32.1638	59.9434	66.2076	38.3773	70.5411
Chr4:56217957-56231678	4	56217957	56231678	27.5285	63.9086	65.4006	28.0809	55.6095
Chr4:56231717-56251870	4	56231717	56251870	40.6005	68.3362	81.8043	52.328	92.9285
Chr4:56251956-56268110	4	56251956	56268110	42.9746	50.3268	80.7981	32.7959	75.7705
Chr4:63135096-63142021	4	63135096	63142021	21.5307	19.5845	33.1698	6.92106	28.4517
Chr4:63965514-63979454	4	63965514	63979454	33.0091	69.1214	71.0679	56.0307	89.0398
Chr4:63979510-63994685	4	63979510	63994685	40.1367	59.4199	53.7758	47.4733	87.61
Chr4:64920054-64947672	4	64920054	64947672	40.0654	70.484	78.0843	24.7737	64.8391
Chr4:65430503-65450980	4	65430503	65450980	26.5015	30.2821	36.5278	18.3299	44.8314
Chr4:65884497-65901912	4	65884497	65901912	25.7747	12.5012	18.3707	6.02329	31.798
Chr4:65902002-65916058	4	65902002	65916058	31.921	25.1904	22.9957	6.38155	38.3026
Chr4:65958436-65978024	4	65958436	65978024	24.5826	24.8339	16.9151	8.12153	32.7042
Chr4:65990405-66010799	4	65990405	66010799	33.5163	38.3338	45.2091	22.8747	56.391
Chr4:66011083-66030928	4	66011083	66030928	37.1038	21.9255	30.9147	12.2018	49.3056
Chr4:66031264-66044822	4	66031264	66044822	38.5335	32.2976	39.1468	20.7698	59.3033
Chr4:66143118-66159898	4	66143118	66159898	42.0782	63.3392	68.1409	24.5881	66.6664
Chr4:66160284-66175892	4	66160284	66175892	19.1893	26.0136	16.4525	6.39407	25.5834
Chr4:66488683-66506001	4	66488683	66506001	35.3129	47.3445	61.6319	33.3546	68.6675
Chr4:67495393-67514100	4	67495393	67514100	34.2538	72.7694	89.6359	55.1738	89.4276
Chr4:70978602-71001122	4	70978602	71001122	29.3482	30.2914	31.7891	21.0905	50.4387
Chr4:71001179-71021974	4	71001179	71021974	26.4809	32.9346	33.5405	14.4878	40.9687
Chr4:73733157-73750705	4	73733157	73750705	29.2581	35.8269	55.8078	28.3985	57.6566
Chr4:74101821-74121240	4	74101821	74121240	27.1644	25.3357	22.702	13.4197	40.5841
Chr4:74458396-74483094	4	74458396	74483094	34.9629	38.2047	30.0455	15.5439	50.5069
Chr4:75825817-75845726	4	75825817	75845726	26.4078	34.2949	32.3809	4.88234	31.2901
Chr4:75845959-75863913	4	75845959	75863913	52.2401	32.0989	58.292	18.5389	70.7789
Chr4:75863923-75883936	4	75863923	75883936	56.672	23.467	45.8582	14.2401	70.9121
Chr4:75884102-75905178	4	75884102	75905178	38.7559	31.9456	45.7795	15.9968	54.7527
Chr4:75905522-75926003	4	75905522	75926003	56.0438	26.5129	53.0167	22.3472	78.3909
Chr4:75989898-76005609	4	75989898	76005609	23.5547	13.3803	22.9015	3.90549	27.4602
Chr4:76914542-76936592	4	76914542	76936592	42.6346	56.944	82.8898	38.298	80.9326
Chr4:76958979-76976177	4	76958979	76976177	20.5654	18.2118	40.1261	6.12179	26.6872
Chr4:78193737-78211857	4	78193737	78211857	18.8038	6.76398	4.53983	4.20381	23.0076
Chr4:78403526-78434278	4	78403526	78434278	28.0823	12.9633	19.2594	15.9708	44.0531
Chr4:79940188-79963120	4	79940188	79963120	33.5552	43.4125	83.3171	46.6136	80.1688
Chr4:80005748-80031365	4	80005748	80031365	48.6627	35.3356	61.9296	22.9332	71.5959
Chr4:80031368-80050286	4	80031368	80050286	36.5672	22.6775	46.1593	14.469	51.0361
Chr4:80926628-80932566	4	80926628	80932566	29.6902	27.0789	36.0885	20.6103	50.3004
Chr4:81717531-81733449	4	81717531	81733449	39.0613	47.3943	41.9305	28.2141	67.2754
Chr4:81993980-82004006	4	81993980	82004006	13.3784	15.781	18.8954	2.7824	16.1608
Chr4:82024488-82036231	4	82024488	82036231	15.3902	19.3995	32.6571	3.11111	18.5013
Chr4:82043929-82059844	4	82043929	82059844	70.1311	40.4057	91.6877	23.6418	93.7729
Chr4:82076720-82095511	4	82076720	82095511	32.0096	33.7067	41.7477	21.9472	53.9568
Chr4:82123820-82140965	4	82123820	82140965	31.9489	52.0967	58.8027	24.9724	56.9213
Chr4:83083049-83094781	4	83083049	83094781	50.2462	15.4105	39.3081	7.13475	57.3809
Chr4:83095102-83108048	4	83095102	83108048	65.319	28.8592	50.1886	16.1686	81.4875
Chr4:83108069-83124110	4	83108069	83124110	54.7352	47.3079	58.2725	21.3528	76.088
Chr4:83141937-83152879	4	83141937	83152879	29.6964	60.3772	85.1785	56.0767	85.7731
Chr4:83162909-83174138	4	83162909	83174138	15.6299	18.6118	30.2862	2.46549	18.0954
Chr4:83174237-83185396	4	83174237	83185396	20.7293	14.0627	22.0044	2.18956	22.9188
Chr4:84182772-84191013	4	84182772	84191013	36.609	27.5091	36.0834	21.0032	57.6122
Chr4:85210196-85223897	4	85210196	85223897	46.6907	57.2517	90.0253	46.4454	93.1361
Chr4:85402799-85413444	4	85402799	85413444	41.7866	32.2712	65.2589	16.7183	58.5049
Chr4:87608299-87619120	4	87608299	87619120	34.7538	80.5403	68.9088	53.2836	88.0374
Chr4:87648117-87659222	4	87648117	87659222	25.5111	68.995	66.4919	64.1269	89.638
Chr4:90621251-90646759	4	90621251	90646759	34.4891	27.7078	35.1017	11.2653	45.7544
Chr4:90948988-90964725	4	90948988	90964725	14.8569	23.1799	26.3048	5.50024	20.3571
Chr4:92386138-92404578	4	92386138	92404578	37.4021	40.7263	69.1401	23.2783	60.6804
Chr4:97121194-97142688	4	97121194	97142688	19.2278	32.7515	39.9903	8.90583	28.1337
Chr4:98817353-98820339	4	98817353	98820339	20.8568	9.50087	19.3476	3.19044	24.0473
Chr4:101718509-101730952	4	101718509	101730952	43.0934	41.8653	55.9911	20.0967	63.1901
Chr4:103426467-103439556	4	103426467	103439556	47.8148	50.5999	71.3012	32.5402	80.355
Chr4:103565064-103579531	4	103565064	103579531	46.8906	21.6983	44.3601	10.5781	57.4687
Chr4:103579546-103594527	4	103579546	103594527	42.7233	54.3254	74.8803	48.1562	90.8795
Chr4:105547058-105561920	4	105547058	105561920	34.628	58.2929	75.222	39.9855	74.6135
Chr4:105835210-105844174	4	105835210	105844174	16.3084	14.991	18.3734	2.5522	18.8606
Chr4:105844224-105859323	4	105844224	105859323	39.0041	25.4611	23.9079	4.65578	43.6599
Chr4:105874044-105887836	4	105874044	105887836	16.537	20.542	16.0808	3.48709	20.0241
Chr4:105887987-105901985	4	105887987	105901985	69.9926	30.3301	46.5448	12.7527	82.7453
Chr4:105902236-105911886	4	105902236	105911886	15.867	28.8113	21.0522	3.43209	19.2991
Chr4:105924050-105936237	4	105924050	105936237	22.8669	26.3826	31.5386	2.04604	24.9129
Chr4:105936322-105944376	4	105936322	105944376	24.9857	17.4695	24.5927	6.81417	31.7998
Chr4:105944445-105958662	4	105944445	105958662	19.9192	17.5365	22.1403	9.20938	29.1285
Chr4:105959084-105971288	4	105959084	105971288	41.0182	30.7162	45.3378	20.6165	61.6347
Chr4:105971295-105981811	4	105971295	105981811	28.0798	21.9504	30.7299	8.64551	36.7254
Chr4:105981848-105994702	4	105981848	105994702	62.8029	25.4083	36.5343	6.01223	68.8151
Chr4:105994708-106004455	4	105994708	106004455	24.8966	21.0813	28.7255	9.10827	34.0048
Chr4:106275928-106289502	4	106275928	106289502	24.746	75.1868	86.5955	65.902	90.648
Chr4:106829414-106836574	4	106829414	106836574	23.4876	59.8451	69.3766	68.6445	92.1321
Chr4:107500901-107506643	4	107500901	107506643	35.6787	38.2737	47.235	22.3893	58.068
Chr4:107514333-107520510	4	107514333	107520510	26.9433	25.2685	31.4169	8.60118	35.5445
Chr4:107520629-107527379	4	107520629	107527379	43.9455	27.7725	48.1104	16.7766	60.722
Chr4:107567440-107571656	4	107567440	107571656	30.5519	55.998	54.3638	39.1223	69.6742
Chr4:107585815-107590646	4	107585815	107590646	17.4554	87.765	87.2518	77.4015	94.8569
Chr4:107599139-107605131	4	107599139	107605131	21.0064	85.556	87.1776	75.9562	96.9626
Chr4:107605220-107611789	4	107605220	107611789	19.1677	85.2847	84.3721	74.4928	93.6605
Chr4:113060316-113082265	4	113060316	113082265	42.8702	23.0614	51.4793	17.2971	60.1673
Chr4:118504421-118514830	4	118504421	118514830	28.5861	40.0542	60.8215	27.4754	56.0615
Chr4:118725900-118741553	4	118725900	118741553	38.5549	43.4758	60.7733	27.6256	66.1806
Chr4:125819417-125830753	4	125819417	125830753	31.0921	22.3702	55.3606	17.24	48.3321
Chr4:125901078-125908988	4	125901078	125908988	10.1834	15.0527	14.9678	4.12708	14.3105
Chr4:127651695-127663326	4	127651695	127663326	25.1472	25.4371	36.451	10.9071	36.0543
Chr4:127756167-127764816	4	127756167	127764816	18.3499	24.2863	34.4005	9.06433	27.4142
Chr4:127764904-127777732	4	127764904	127777732	25.5173	18.5343	20.1995	4.96446	30.4818
Chr4:127777770-127785843	4	127777770	127785843	18.8661	10.2389	15.5428	5.54811	24.4142
Chr4:127785871-127794113	4	127785871	127794113	36.6172	18.4239	26.9981	7.85277	44.4699
Chr4:127794145-127803810	4	127794145	127803810	36.8747	23.6741	23.9911	2.48065	39.3553
Chr4:127803877-127812938	4	127803877	127812938	19.0241	25.7969	26.1138	5.80225	24.8264
Chr4:127812995-127822096	4	127812995	127822096	58.4035	19.6749	57.0688	11.6732	70.0766
Chr4:127822416-127834245	4	127822416	127834245	46.7429	28.5347	49.7422	10.2117	56.9545
Chr4:127834265-127846053	4	127834265	127846053	37.0348	21.017	44.0451	12.9171	49.9519
Chr4:127846248-127859656	4	127846248	127859656	32.4921	30.561	59.6553	17.2912	49.7833
Chr4:127913608-127923630	4	127913608	127923630	32.4444	13.4937	17.9608	5.2957	37.7401
Chr4:127923856-127931393	4	127923856	127931393	48.5394	8.48521	25.2124	3.29448	51.8339
Chr4:128150965-128158904	4	128150965	128158904	10.8221	23.375	22.1214	2.61938	13.4415
Chr4:128178450-128186920	4	128178450	128186920	23.833	13.2544	16.8581	4.65297	28.4859
Chr4:130889359-130897000	4	130889359	130897000	11.2642	19.2129	20.1973	2.29882	13.563
Chr4:131349016-131358000	4	131349016	131358000	38.9711	14.2537	37.3524	4.25927	43.2303
Chr4:131358018-131368479	4	131358018	131368479	18.5479	15.8703	26.5043	5.88195	24.4299
Chr4:132212104-132220019	4	132212104	132220019	16.9992	12.947	12.6233	10.2282	27.2274
Chr4:139885961-139894863	4	139885961	139894863	11.1434	26.5387	16.3287	2.2779	13.4213
Chr4:149437946-149445369	4	149437946	149445369	19.9382	24.0172	20.1316	6.71147	26.6497
Chr4:152392062-152396992	4	152392062	152396992	35.1123	57.6047	43.2084	43.9539	79.0662
Chr4:152396998-152402181	4	152396998	152402181	44.6057	44.06	25.9486	24.4576	69.0634
Chr4:152408930-152415015	4	152408930	152415015	39.3528	34.6938	22.5094	24.9765	64.3293
Chr4:152415049-152420532	4	152415049	152420532	54.3269	29.0426	16.6262	16.6332	70.9601
Chr4:153590508-153598672	4	153590508	153598672	17.487	16.7062	18.2165	4.22217	21.7092
Chr4:153678838-153688223	4	153678838	153688223	32.7488	33.8159	40.9008	14.6492	47.398
Chr4:153816858-153823395	4	153816858	153823395	9.25822	16.4603	19.5246	1.16184	10.4201
Chr4:153830093-153836177	4	153830093	153836177	25.7329	27.9821	29.5176	5.46591	31.1988
Chr4:153836178-153844154	4	153836178	153844154	20.2915	19.3019	21.2973	2.8553	23.1468
Chr4:153844178-153850575	4	153844178	153850575	29.2212	17.1794	12.815	5.69474	34.9159
Chr4:153850660-153857910	4	153850660	153857910	42.1406	40.702	48.3025	27.1526	69.2931
Chr4:153857923-153866506	4	153857923	153866506	31.3908	48.2656	50.4137	34.2331	65.6239
Chr4:154689546-154699481	4	154689546	154699481	15.0164	26.7041	23.0545	8.99963	24.0161
Chr4:155269401-155276360	4	155269401	155276360	28.9794	63.979	27.7184	42.031	71.0104
Chr5:3373242-3382479	5	3373242	3382479	12.2367	12.4444	21.3537	4.15219	16.3889
Chr5:4317534-4331557	5	4317534	4331557	32.3853	51.3191	73.3893	31.59	63.9753
Chr5:4332176-4345000	5	4332176	4345000	44.7112	49.2886	77.7834	24.9624	69.6736
Chr5:4358748-4371479	5	4358748	4371479	50.9541	18.6408	57.6042	5.35545	56.3095
Chr5:4371751-4382125	5	4371751	4382125	33.9375	68.2042	84.9651	48.199	82.1365
Chr5:4391417-4407388	5	4391417	4407388	31.5901	29.6803	63.1327	16.3444	47.9346
Chr5:4581639-4597329	5	4581639	4597329	38.9981	36.3301	68.0842	25.2696	64.2677
Chr5:4706444-4720924	5	4706444	4720924	33.3967	40.4408	44.7734	21.2862	54.6828
Chr5:4721171-4732520	5	4721171	4732520	48.1549	55.6887	53.5301	33.8196	81.9745
Chr5:4732554-4745194	5	4732554	4745194	66.7843	26.0939	31.9522	5.25667	72.041
Chr5:6435245-6457551	5	6435245	6457551	44.5073	45.5767	52.7027	27.052	71.5593
Chr5:7390664-7411702	5	7390664	7411702	35.1757	57.5288	62.1161	36.1416	71.3173
Chr5:9194283-9205483	5	9194283	9205483	15.5667	28.2375	23.1997	2.66711	18.2338
Chr5:10382161-10404984	5	10382161	10404984	32.0655	21.253	21.3911	12.3542	44.4196
Chr5:12023697-12041300	5	12023697	12041300	28.8977	57.8803	69.4177	54.0504	82.948
Chr5:14178686-14184345	5	14178686	14184345	34.421	45.5736	40.0794	31.2254	65.6464
Chr5:14184376-14198472	5	14184376	14198472	51.4555	51.7176	40.0743	30.3829	81.8384
Chr5:14234433-14247404	5	14234433	14247404	23.3033	42.2476	20.6449	2.87166	26.1749
Chr5:16759343-16782122	5	16759343	16782122	30.9692	34.3331	44.925	16.8159	47.7851
Chr5:17970504-17986251	5	17970504	17986251	27.8097	28.2409	40.9483	22.3569	50.1667
Chr5:17986774-18005184	5	17986774	18005184	34.536	29.7545	35.3935	13.3391	47.8751
Chr5:18005615-18023884	5	18005615	18023884	38.268	49.2145	47.881	31.2338	69.5018
Chr5:18187973-18213646	5	18187973	18213646	26.6726	27.4051	38.8053	16.8887	43.5613
Chr5:21813730-21821056	5	21813730	21821056	14.4304	23.1207	31.2473	4.46209	18.8924
Chr5:21840424-21848983	5	21840424	21848983	33.7315	62.0818	88.1119	57.9196	91.6511
Chr5:21848984-21861994	5	21848984	21861994	31.2581	29.9014	44.6497	12.1202	43.3783
Chr5:22605463-22621707	5	22605463	22621707	15.0096	86.3878	92.6224	81.0916	96.1012
Chr5:22710496-22724832	5	22710496	22724832	40.1401	55.4455	83.235	41.2745	81.4146
Chr5:22746039-22750151	5	22746039	22750151	31.3602	2.26264	10.0376	9.1613	40.5215
Chr5:22750393-22770957	5	22750393	22770957	33.4029	33.0552	56.5457	24.1185	57.5215
Chr5:22771390-22787412	5	22771390	22787412	23.4786	20.9268	32.2379	10.3281	33.8067
Chr5:22845001-22858188	5	22845001	22858188	30.6771	19.8669	28.6901	9.47101	40.1481
Chr5:22871264-22888495	5	22871264	22888495	21.2675	18.8007	25.5784	4.98591	26.2534
Chr5:25210863-25222289	5	25210863	25222289	32.1407	44.9472	41.4661	19.8765	52.0173
Chr5:26341393-26356867	5	26341393	26356867	54.9287	46.391	82.281	32.4022	87.3309
Chr5:26357040-26373615	5	26357040	26373615	58.8373	32.4747	78.057	32.4678	91.3051
Chr5:26386973-26400536	5	26386973	26400536	41.1503	51.6956	73.8181	42.9523	84.1026
Chr5:26586157-26602447	5	26586157	26602447	44.0917	57.3311	69.7196	30.8444	74.9361
Chr5:26602646-26625270	5	26602646	26625270	38.3178	43.7832	61.514	24.1319	62.4497
Chr5:26702141-26725243	5	26702141	26725243	24.6555	29.7778	40.5439	15.7807	40.4362
Chr5:27933207-27952080	5	27933207	27952080	18.7569	22.2883	29.9516	5.14161	23.8985
Chr5:27952429-27970320	5	27952429	27970320	49.759	46.8612	62.9908	28.8012	78.5602
Chr5:27970348-27985798	5	27970348	27985798	48.7293	43.5889	73.6442	29.3524	78.0817
Chr5:30578068-30587915	5	30578068	30587915	20.4352	25.0163	29.1541	12.7403	33.1755
Chr5:32211458-32220538	5	32211458	32220538	29.8315	28.5267	42.0008	16.8662	46.6977
Chr5:35512843-35523114	5	35512843	35523114	44.2746	35.4042	18.5233	21.6974	65.972
Chr5:35523129-35530154	5	35523129	35530154	21.4246	10.8683	7.97666	4.57721	26.0018
Chr5:35634273-35644388	5	35634273	35644388	31.2328	56.5726	71.2009	33.9868	65.2195
Chr5:35644546-35655241	5	35644546	35655241	26.5077	31.1947	42.6814	12.7636	39.2713
Chr5:36852210-36861882	5	36852210	36861882	22.5549	16.2401	19.1515	5.07287	27.6278
Chr5:37245974-37252211	5	37245974	37252211	21.2926	8.68659	8.8242	7.81431	29.1069
Chr5:37252227-37265042	5	37252227	37265042	47.1166	30.8183	28.9635	23.8537	70.9704
Chr5:37265053-37275628	5	37265053	37275628	25.0622	75.7994	58.0741	66.3512	91.4134
Chr5:37275737-37284116	5	37275737	37284116	28.5018	80.9049	57.6635	64.8444	93.3462
Chr5:37284120-37291936	5	37284120	37291936	28.2434	66.5149	53.5052	57.4556	85.699
Chr5:39644486-39653220	5	39644486	39653220	5.47183	6.08464	4.50564	0.362319	5.83415
Chr5:39688229-39709060	5	39688229	39709060	26.4917	75.9362	80.0096	67.37	93.8616
Chr5:39730423-39755702	5	39730423	39755702	30.4248	32.0098	47.3922	20.9045	51.3292
Chr5:40173408-40197850	5	40173408	40197850	45.6185	31.2244	67.4816	16.4207	62.0392
Chr5:41056228-41077481	5	41056228	41077481	47.1884	18.244	28.1787	8.35873	55.5472
Chr5:43133910-43148670	5	43133910	43148670	29.2775	53.447	62.2683	26.0609	55.3384
Chr5:43383842-43400585	5	43383842	43400585	45.7696	41.3041	71.8445	30.9155	76.6851
Chr5:43401112-43418358	5	43401112	43418358	44.7107	24.7658	39.0828	7.05949	51.7702
Chr5:43539147-43552705	5	43539147	43552705	18.7334	16.4336	11.0174	2.04403	20.7774
Chr5:43552836-43568379	5	43552836	43568379	53.7044	35.4738	38.8307	7.05556	60.7599
Chr5:43581596-43596763	5	43581596	43596763	35.4591	36.1716	67.7876	30.194	65.6531
Chr5:43596774-43613945	5	43596774	43613945	57.547	52.7296	87.9081	34.4067	91.9536
Chr5:43685457-43696675	5	43685457	43696675	43.9728	49.4717	51.9681	23.1325	67.1052
Chr5:45175352-45194474	5	45175352	45194474	26.3443	37.531	40.0906	18.2576	44.6019
Chr5:51463607-51474661	5	51463607	51474661	45.2072	44.9139	46.6173	18.2086	63.4158
Chr5:51474721-51491273	5	51474721	51491273	34.7767	31.7206	43.5409	12.0508	46.8275
Chr5:53700289-53706291	5	53700289	53706291	29.0182	66.7303	82.9688	60.3889	89.4071
Chr5:55656478-55664659	5	55656478	55664659	25.3269	75.8739	84.4681	62.027	87.3539
Chr5:57899287-57917945	5	57899287	57917945	16.0636	13.7679	20.2589	4.30817	20.3717
Chr5:59473271-59500925	5	59473271	59500925	40.6918	56.3873	73.6736	35.332	76.0238
Chr5:60655523-60674715	5	60655523	60674715	26.5954	72.6789	83.0057	58.0513	84.6467
Chr5:60674759-60695353	5	60674759	60695353	39.5061	31.6939	65.0049	23.0924	62.5985
Chr5:62163445-62187661	5	62163445	62187661	39.0452	57.6524	78.9863	46.2504	85.2956
Chr5:62225157-62228812	5	62225157	62228812	33.3019	57.5408	83.8209	46.2918	79.5937
Chr5:62243978-62265180	5	62243978	62265180	27.6559	75.2824	75.8081	59.3852	87.041
Chr5:64694010-64701943	5	64694010	64701943	23.4072	19.3602	28.166	1.79644	25.2036
Chr5:64701963-64709923	5	64701963	64709923	46.8037	28.2019	66.6632	22.6674	69.4711
Chr5:64709931-64724047	5	64709931	64724047	30.7626	41.8455	76.3505	48.8306	79.5932
Chr5:65944233-65952842	5	65944233	65952842	33.6651	31.7894	46.249	9.82708	43.4922
Chr5:65958792-65966914	5	65958792	65966914	20.3638	25.8976	25.015	5.61084	25.9747
Chr5:65967041-65973850	5	65967041	65973850	15.9421	17.3328	24.1511	2.8744	18.8165
Chr5:67038818-67046572	5	67038818	67046572	71.6691	16.7233	56.7606	9.37102	81.0401
Chr5:67046594-67055377	5	67046594	67055377	77.7498	20.3972	57.3383	8.33866	86.0884
Chr5:67055400-67062682	5	67055400	67062682	24.8858	9.44577	28.4939	5.67041	30.5562
Chr5:67062815-67071250	5	67062815	67071250	21.9664	17.1633	31.5777	3.45543	25.4219
Chr5:68012573-68026175	5	68012573	68026175	20.6815	18.7652	36.0027	2.00823	22.6897
Chr5:68026247-68043436	5	68026247	68043436	58.0247	41.4422	60.0225	18.5546	76.5793
Chr5:68384858-68407803	5	68384858	68407803	31.2913	27.7418	47.9652	28.3524	59.6437
Chr5:69336792-69341239	5	69336792	69341239	52.7114	22.9596	64.6604	33.1924	85.9038
Chr5:69341250-69352137	5	69341250	69352137	59.9287	20.2779	47.5612	27.9083	87.837
Chr5:72648042-72656506	5	72648042	72656506	21.6447	12.5799	12.9241	4.25631	25.901
Chr5:73631297-73637946	5	73631297	73637946	31.9366	42.9822	37.5149	27.2898	59.2264
Chr5:73638172-73645299	5	73638172	73645299	59.8087	34.0609	42.4407	17.8397	77.6484
Chr5:73645318-73647989	5	73645318	73647989	10.018	4.7614	7.80573	0.800319	10.8183
Chr5:74618343-74626406	5	74618343	74626406	12.9426	20.6954	21.2882	2.89168	15.8343
Chr5:74673494-74684069	5	74673494	74684069	12.9866	18.1966	18.9595	4.08015	17.0667
Chr5:75189344-75195637	5	75189344	75195637	31.3338	35.5332	44.8216	36.4645	67.7983
Chr5:75223746-75239575	5	75223746	75239575	52.0293	26.634	34.2463	16.6672	68.6965
Chr5:75239595-75248191	5	75239595	75248191	20.1254	14.2411	12.3333	3.77134	23.8967
Chr5:75668669-75678944	5	75668669	75678944	45.0002	62.8084	89.8748	29.1985	74.1988
Chr5:75678975-75690440	5	75678975	75690440	54.3924	70.6803	81.875	28.8009	83.1933
Chr5:75690485-75698765	5	75690485	75698765	37.9416	30.6871	66.8982	7.55142	45.4931
Chr5:75838129-75848258	5	75838129	75848258	33.5991	21.2254	27.1084	6.95573	40.5548
Chr5:75855783-75863877	5	75855783	75863877	25.6864	25.3699	29.2566	6.20659	31.893
Chr5:75864075-75875468	5	75864075	75875468	36.7164	38.0079	50.0146	15.6565	52.3728
Chr5:75875681-75888495	5	75875681	75888495	22.9053	28.453	21.2462	4.72324	27.6286
Chr5:75933742-75940298	5	75933742	75940298	45.1374	48.2806	68.1328	34.2485	79.3859
Chr5:75940439-75948838	5	75940439	75948838	53.2844	64.3731	65.5597	33.0282	86.3126
Chr5:75948853-75957180	5	75948853	75957180	45.0416	53.053	73.5982	32.9795	78.0211
Chr5:76470533-76481293	5	76470533	76481293	15.3604	21.8676	38.9344	6.14465	21.505
Chr5:77608891-77620981	5	77608891	77620981	21.7659	21.3086	20.1811	7.68165	29.4476
Chr5:77640208-77652143	5	77640208	77652143	45.0912	14.173	30.0568	10.122	55.2132
Chr5:77652187-77665164	5	77652187	77665164	26.9218	28.402	21.9139	8.51331	35.4351
Chr5:81151279-81161752	5	81151279	81161752	26.6544	32.3122	39.126	16.0296	42.684
Chr5:86299602-86310353	5	86299602	86310353	50.1205	27.0856	49.5471	17.9577	68.0782
Chr5:87380258-87395862	5	87380258	87395862	32.3649	50.0571	71.9459	41.5367	73.9016
Chr5:89259799-89275733	5	89259799	89275733	35.7253	53.1068	65.8985	42.9979	78.7232
Chr5:90000851-90016493	5	90000851	90016493	34.5988	60.0878	60.2402	32.702	67.3008
Chr5:90016530-90029743	5	90016530	90029743	39.3835	63.3374	71.7869	45.7233	85.1067
Chr5:90029745-90044384	5	90029745	90044384	27.2266	77.9461	83.0835	63.6842	90.9108
Chr5:90485232-90492903	5	90485232	90492903	31.7971	63.5556	76.2183	57.1409	88.938
Chr5:90762659-90772678	5	90762659	90772678	42.8597	21.5698	25.537	4.68136	47.5411
Chr5:90772735-90781493	5	90772735	90781493	60.7203	27.2546	38.4724	5.02805	65.7483
Chr5:90781561-90790057	5	90781561	90790057	58.2327	32.8219	34.4669	9.07142	67.3041
Chr5:91245805-91261460	5	91245805	91261460	38.9864	58.5389	32.7396	29.8678	68.8541
Chr5:91261528-91279684	5	91261528	91279684	39.3764	50.5059	56.1107	47.2894	86.6658
Chr5:91280258-91295629	5	91280258	91295629	39.4727	51.8845	67.4045	46.1992	85.6719
Chr5:91295634-91305469	5	91295634	91305469	58.0124	36.4353	44.5364	31.1976	89.21
Chr5:99978818-99980153	5	99978818	99980153	4.2735	1.83	2.45818	0	4.2735
Chr5:100107407-100115513	5	100107407	100115513	10.4031	20.3331	21.2781	2.60255	13.0057
Chr5:100856728-100865950	5	100856728	100865950	14.4065	18.8237	12.8644	5.00649	19.413
Chr5:101114951-101126745	5	101114951	101126745	25.5722	40.1296	49.9222	24.3677	49.9399
Chr5:101142139-101156062	5	101142139	101156062	43.6857	41.3085	74.3627	23.5225	67.2081
Chr5:101156184-101167858	5	101156184	101167858	44.9734	27.6962	69.9641	20.9462	65.9197
Chr5:101167889-101175591	5	101167889	101175591	36.3624	24.0248	37.1911	10.0723	46.4347
Chr5:101175790-101186442	5	101175790	101186442	27.3021	22.494	29.1908	3.16562	30.4677
Chr5:101274688-101286624	5	101274688	101286624	27.8572	15.3431	22.0536	5.74946	33.6067
Chr5:101286742-101295583	5	101286742	101295583	53.7751	21.3068	38.3842	3.5743	57.3494
Chr5:101295616-101306717	5	101295616	101306717	43.6235	16.9671	31.8913	3.71798	47.3414
Chr5:101306725-101316488	5	101306725	101316488	25.1893	34.3608	45.7794	10.0088	35.1981
Chr5:102173042-102187420	5	102173042	102187420	42.6734	61.9076	85.0982	39.4275	82.1009
Chr5:102203337-102209313	5	102203337	102209313	45.722	53.8805	52.1809	22.2747	67.9966
Chr5:102227531-102239936	5	102227531	102239936	46.6893	46.8764	60.743	18.98	65.6693
Chr5:102240008-102248071	5	102240008	102248071	25.0542	30.9858	38.4013	14.9129	39.9671
Chr5:102248080-102259889	5	102248080	102259889	26.5561	39.8417	46.0104	9.84672	36.4029
Chr5:102867677-102875575	5	102867677	102875575	40.7485	46.7294	39.5564	32.142	72.8905
Chr5:102887887-102894573	5	102887887	102894573	39.493	51.22	56.8402	37.2435	76.7365
Chr5:102904396-102912879	5	102904396	102912879	13.2974	17.8219	29.3751	3.98616	17.2835
Chr5:102912882-102921847	5	102912882	102921847	20.4936	35.0547	52.5781	9.9097	30.4033
Chr5:102921849-102933349	5	102921849	102933349	36.7104	80.8428	89.3786	58.3549	95.0653
Chr5:102944692-102952863	5	102944692	102952863	31.7927	31.3876	53.2611	11.7239	43.5166
Chr5:102952895-102963524	5	102952895	102963524	35.7793	51.3913	73.3386	35.4712	71.2505
Chr5:102963530-102976066	5	102963530	102976066	47.8466	69.313	85.8894	37.8056	85.6522
Chr5:102986218-102993895	5	102986218	102993895	17.7561	81.3728	92.9925	78.3378	96.0939
Chr5:102993942-103001799	5	102993942	103001799	42.1415	61.3263	90.6471	45.3843	87.5258
Chr5:103001804-103011030	5	103001804	103011030	52.0919	46.2175	82.7006	27.1168	79.2088
Chr5:103589185-103596140	5	103589185	103596140	12.6729	87.8406	93.224	81.9914	94.6643
Chr5:104238258-104252586	5	104238258	104252586	16.7292	17.7784	22.8228	4.49123	21.2204
Chr5:104269401-104281502	5	104269401	104281502	35.7022	73.4084	87.979	55.3953	91.0975
Chr5:104281875-104293113	5	104281875	104293113	50.2158	47.3826	59.6118	27.1667	77.3825
Chr5:104293124-104302629	5	104293124	104302629	38.3444	19.7443	30.2332	10.6362	48.9806
Chr5:104302676-104310903	5	104302676	104310903	38.2293	23.8391	41.9948	7.67139	45.9007
Chr5:104444368-104455024	5	104444368	104455024	24.22	13.7951	20.3131	3.60944	27.8295
Chr5:106158052-106166246	5	106158052	106166246	13.4595	18.4562	19.7213	4.95983	18.4193
Chr5:106177345-106183158	5	106177345	106183158	10.2837	9.34934	9.44625	2.44098	12.7247
Chr5:106363965-106370305	5	106363965	106370305	28.4745	59.516	77.8197	50.837	79.3115
Chr5:106738580-106748518	5	106738580	106748518	34.7293	29.4085	29.7974	13.3448	48.0741
Chr5:106797860-106803080	5	106797860	106803080	37.9038	33.4584	37.4155	19.72	57.6238
Chr5:106803148-106811917	5	106803148	106811917	31.6971	29.6477	48.0565	16.9811	48.6782
Chr5:109552981-109555677	5	109552981	109555677	22.402	30.728	50.926	7.9148	30.3168
Chr5:111634884-111641104	5	111634884	111641104	12.2022	10.7597	9.99427	2.13512	14.3373
Chr5:112069588-112076495	5	112069588	112076495	33.0376	64.4023	65.1808	34.8149	67.8525
Chr5:113379535-113386673	5	113379535	113386673	40.8164	21.4238	33.1662	8.27712	49.0935
Chr5:114259997-114265775	5	114259997	114265775	34.6726	37.4705	40.801	17.0403	51.713
Chr5:114265776-114271181	5	114265776	114271181	43.9857	19.9525	26.1325	5.49204	49.4777
Chr5:117069871-117078813	5	117069871	117078813	27.9606	23.1282	23.9737	7.9578	35.9183
Chr5:118154641-118156624	5	118154641	118156624	2.7037	4.77342	8.22485	0	2.7037
Chr5:119932638-119943883	5	119932638	119943883	36.8017	59.5537	73.9849	43.8676	80.6692
Chr5:119943903-119952612	5	119943903	119952612	28.5159	21.7973	34.7015	7.61859	36.1345
Chr5:119952646-119960985	5	119952646	119960985	13.9503	15.0939	18.5823	4.81433	18.7647
Chr5:119961022-119969316	5	119961022	119969316	16.1887	16.7686	12.2933	0.591532	16.7803
Chr5:125835343-125848015	5	125835343	125848015	39.6419	51.9025	49.7303	19.6915	59.3334
Chr5:126595134-126602691	5	126595134	126602691	30.5725	68.3846	77.8167	42.8676	73.4402
Chr5:126602888-126616646	5	126602888	126616646	22.2093	16.1726	30.1348	6.4426	28.6519
Chr5:126897049-126912818	5	126897049	126912818	27.7917	28.5027	38.5032	12.2139	40.0056
Chr5:132584688-132594062	5	132584688	132594062	39.8375	49.1974	42.9524	20.6671	60.5046
Chr5:132661898-132672888	5	132661898	132672888	35.2171	26.6022	39.2403	12.907	48.1241
Chr5:132673014-132684644	5	132673014	132684644	38.7214	35.1825	26.262	9.70457	48.4259
Chr5:133749259-133764511	5	133749259	133764511	48.537	15.3994	36.9714	7.46649	56.0035
Chr5:133764739-133783311	5	133764739	133783311	56.6705	28.87	51.1946	8.44916	65.1197
Chr5:134887110-134892973	5	134887110	134892973	20.2481	24.2788	32.6721	5.5057	25.7538
Chr5:134893018-134901444	5	134893018	134901444	28.9229	19.5651	46.5099	4.70884	33.6318
Chr5:134901498-134910325	5	134901498	134910325	22.9178	16.9292	35.3493	6.23485	29.1526
Chr5:138263581-138266590	5	138263581	138266590	35.7473	23.4813	22.2526	34.298	70.0453
Chr5:140892976-140903514	5	140892976	140903514	30.0346	69.0438	77.1591	53.4441	83.4787
Chr5:146336140-146344550	5	146336140	146344550	24.4604	21.5405	13.0721	7.44098	31.9014
Chr5:149502255-149508679	5	149502255	149508679	24.2784	29.7798	33.2774	6.27952	30.5579
Chr5:149508725-149516158	5	149508725	149516158	25.3577	21.5052	26.8166	3.69919	29.0569
Chr5:149516366-149525184	5	149516366	149525184	8.20267	16.0296	17.781	2.80676	11.0094
Chr5:149877201-149886634	5	149877201	149886634	24.469	29.0083	41.835	8.78352	33.2525
Chr5:151684334-151695285	5	151684334	151695285	32.3971	42.7296	50.1983	26.1231	58.5202
Chr5:151695410-151713595	5	151695410	151713595	58.4309	36.2002	61.9563	18.3595	76.7903
Chr5:151713613-151728950	5	151713613	151728950	27.9308	15.7903	21.1685	9.21599	37.1468
Chr6:4604667-4613539	6	4604667	4613539	44.104	22.7892	25.3397	3.82788	47.9319
Chr6:4613590-4624125	6	4613590	4624125	39.3765	26.875	20.2929	4.46825	43.8447
Chr6:4624211-4634664	6	4624211	4634664	72.0016	22.5126	38.0136	8.64846	80.65
Chr6:6756961-6772006	6	6756961	6772006	48.8571	54.4727	83.2145	40.3739	89.231
Chr6:7177319-7190779	6	7177319	7190779	37.262	62.9277	84.5477	41.2677	78.5297
Chr6:10761755-10786026	6	10761755	10786026	44.1902	52.6134	57.4659	36.2428	80.433
Chr6:17065542-17074175	6	17065542	17074175	11.0028	11.4249	9.885	1.62264	12.6255
Chr6:17100136-17108738	6	17100136	17108738	19.4912	33.0022	25.0149	7.03324	26.5245
Chr6:17141200-17154510	6	17141200	17154510	18.5592	16.2895	19.5918	5.30375	23.863
Chr6:17154617-17170056	6	17154617	17170056	39.5993	40.2878	39.2108	13.8769	53.4763
Chr6:17170115-17177061	6	17170115	17177061	41.056	34.6635	35.4383	14.0271	55.0831
Chr6:18449703-18465726	6	18449703	18465726	34.7448	43.8915	40.9051	17.8	52.5448
Chr6:18465739-18482209	6	18465739	18482209	31.4624	31.091	39.2912	30.5901	62.0525
Chr6:20550708-20570952	6	20550708	20570952	41.0274	28.8762	35.0119	14.1667	55.1941
Chr6:22469184-22481353	6	22469184	22481353	35.2283	64.1032	81.0523	49.6011	84.8294
Chr6:22540095-22560378	6	22540095	22560378	48.3806	20.5224	22.0602	12.7092	61.0898
Chr6:22578902-22598873	6	22578902	22598873	26.493	24.1025	15.261	10.4235	36.9165
Chr6:29447772-29452288	6	29447772	29452288	18.0095	31.0696	16.416	8.55763	26.5672
Chr6:29452308-29456477	6	29452308	29456477	19.4065	30.9212	19.7408	13.0738	32.4802
Chr6:31010366-31017455	6	31010366	31017455	22.6639	19.6186	26.6339	5.59774	28.2616
Chr6:32081412-32094154	6	32081412	32094154	32.8347	66.2783	67.3636	47.6856	80.5203
Chr6:32665478-32679204	6	32665478	32679204	62.626	44.7774	87.1117	23.7054	86.3314
Chr6:37617667-37632253	6	37617667	37632253	30.444	50.4432	53.4142	30.4686	60.9126
Chr6:39025958-39036259	6	39025958	39036259	26.508	77.8491	72.9792	63.2798	89.7878
Chr6:39632979-39647280	6	39632979	39647280	5.46224	95.4701	92.2126	93.6831	99.1453
Chr6:41149665-41171288	6	41149665	41171288	38.4313	56.7213	71.4963	32.3098	70.7412
Chr6:41655558-41673591	6	41655558	41673591	30.5701	24.7022	13.7638	4.12829	34.6984
Chr6:48840337-48851627	6	48840337	48851627	34.6408	26.8123	30.2035	11.4137	46.0545
Chr6:50488491-50502683	6	50488491	50502683	23.7946	19.6233	27.4032	6.70132	30.4959
Chr6:50502825-50515131	6	50502825	50515131	39.258	21.8764	21.1968	4.12066	43.3787
Chr6:53338504-53350184	6	53338504	53350184	28.8147	30.398	28.0353	8.27579	37.0905
Chr6:53350269-53363902	6	53350269	53363902	16.3017	33.391	14.2191	5.8841	22.1858
Chr6:53461265-53472069	6	53461265	53472069	25.1584	24.2671	43.016	11.1197	36.278
Chr6:53472179-53481207	6	53472179	53481207	67.3103	29.7372	54.3927	14.6495	81.9598
Chr6:53489572-53501234	6	53489572	53501234	16.7611	22.6757	22.4606	7.82141	24.5825
Chr6:53516807-53530417	6	53516807	53530417	11.307	20.5853	18.4532	5.2227	16.5297
Chr6:53692922-53701777	6	53692922	53701777	14.5291	19.1932	11.7626	3.3366	17.8657
Chr6:53735775-53750325	6	53735775	53750325	16.8944	26.1534	16.6911	3.97301	20.8674
Chr6:53750331-53762502	6	53750331	53762502	28.1732	25.0196	32.3382	5.79378	33.967
Chr6:53762521-53770186	6	53762521	53770186	34.0659	37.1584	49.4692	26.5886	60.6545
Chr6:53783060-53790760	6	53783060	53790760	47.7412	67.7683	85.5595	42.3218	90.0631
Chr6:57439742-57453522	6	57439742	57453522	49.6249	53.1349	66.4724	23.5811	73.206
Chr6:59804024-59824543	6	59804024	59824543	36.9942	67.84	76.8139	48.8558	85.85
Chr6:59824579-59848252	6	59824579	59848252	39.8147	63.4709	65.8054	45.1246	84.9394
Chr6:59858004-59873469	6	59858004	59873469	36.0785	45.1501	41.8265	30.286	66.3645
Chr6:61119623-61140349	6	61119623	61140349	24.6174	33.3596	47.9999	20.0024	44.6199
Chr6:61255302-61271577	6	61255302	61271577	42.2218	22.9294	25.6029	2.76596	44.9877
Chr6:61271644-61286182	6	61271644	61286182	34.4002	67.317	81.567	49.7489	84.1491
Chr6:61311991-61322468	6	61311991	61322468	46.9557	61.1712	66.3262	33.0569	80.0127
Chr6:61322508-61337285	6	61322508	61337285	41.3919	60.7057	72.4068	41.8639	83.2558
Chr6:64839925-64859785	6	64839925	64859785	29.5823	26.4086	39.5384	10.5293	40.1116
Chr6:64910981-64923603	6	64910981	64923603	59.3198	24.0653	43.1062	7.66147	66.9813
Chr6:65338376-65353454	6	65338376	65353454	28.1356	18.2222	35.7851	10.1435	38.2791
Chr6:71440142-71440748	6	71440142	71440748	6.06312	1.34919	0.650705	0.230055	6.29318
Chr6:72158185-72165100	6	72158185	72165100	14.2289	18.339	16.9665	7.92033	22.1493
Chr6:73743382-73761188	6	73743382	73761188	47.3582	46.428	72.5167	32.4525	79.8107
Chr6:73761342-73780849	6	73761342	73780849	34.3688	73.8183	80.1099	56.6178	90.9866
Chr6:73780895-73802235	6	73780895	73802235	27.1427	52.9666	76.9871	58.526	85.6687
Chr6:77904083-77924217	6	77904083	77924217	27.1857	66.2009	63.7562	52.9919	80.1776
Chr6:80918025-80943368	6	80918025	80943368	45.0585	13.4837	10.4614	11.444	56.5025
Chr6:80943489-80966362	6	80943489	80966362	22.3205	20.7465	19.6126	15.3088	37.6294
Chr6:82913537-82918906	6	82913537	82918906	16.6679	16.9247	22.2316	2.71482	19.3827
Chr6:83001014-83010218	6	83001014	83010218	14.3269	32.8811	13.3881	4.67939	19.0063
Chr6:83010222-83020325	6	83010222	83020325	47.504	34.6494	21.3561	16.193	63.697
Chr6:83020385-83029374	6	83020385	83029374	36.0581	30.9543	23.6815	22.076	58.1341
Chr6:83029452-83033226	6	83029452	83033226	15.6331	11.8377	10.3968	2.23654	17.8696
Chr6:87133480-87143178	6	87133480	87143178	17.4719	83.0583	88.6596	76.9625	94.4344
Chr6:87152063-87160100	6	87152063	87160100	37.9346	63.0613	82.3629	44.7104	82.645
Chr6:87202041-87207772	6	87202041	87207772	23.7718	27.4977	29.0975	4.60763	28.3795
Chr6:87207784-87219100	6	87207784	87219100	50.0762	47.3209	88.3359	39.389	89.4652
Chr6:87219146-87229134	6	87219146	87229134	30.6434	17.7055	52.4441	15.8679	46.5112
Chr6:87239163-87248730	6	87239163	87248730	58.0734	30.292	82.9739	27.0037	85.0771
Chr6:87249025-87257143	6	87249025	87257143	63.4673	44.6214	92.12	28.9852	92.4525
Chr6:87257163-87268485	6	87257163	87268485	32.6857	16.3956	48.0508	9.95673	42.6425
Chr6:87268601-87277056	6	87268601	87277056	33.7122	22.8697	49.2633	9.10648	42.8186
Chr6:87720993-87730358	6	87720993	87730358	16.5584	16.4941	18.778	2.82206	19.3804
Chr6:91257973-91266376	6	91257973	91266376	23.4065	36.6497	25.2061	24.0148	47.4212
Chr6:94759697-94769324	6	94759697	94769324	20.2971	18.2644	20.6586	3.60962	23.9068
Chr6:94769340-94777319	6	94769340	94777319	38.2038	11.5843	19.7029	4.58778	42.7916
Chr6:94777321-94788226	6	94777321	94788226	42.5685	21.9679	38.6067	4.92739	47.4959
Chr6:94788228-94801163	6	94788228	94801163	13.6946	15.6573	21.176	4.18104	17.8756
Chr6:95981045-95996917	6	95981045	95996917	42.5161	56.7027	34.2024	29.1232	71.6392
Chr6:96010473-96023658	6	96010473	96023658	29.084	33.23	18.5332	11.577	40.661
Chr6:96023664-96040857	6	96023664	96040857	43.9164	55.5679	43.8573	39.7492	83.6656
Chr6:96040861-96064827	6	96040861	96064827	35.2222	47.7256	34.8115	36.5716	71.7939
Chr6:96087353-96103862	6	96087353	96103862	40.288	36.1604	32.9399	18.5791	58.8671
Chr6:96458267-96472523	6	96458267	96472523	29.571	33.3873	51.2405	15.3892	44.9602
Chr6:98354244-98366350	6	98354244	98366350	24.9466	14.5866	23.6152	11.0102	35.9568
Chr6:99823190-99833415	6	99823190	99833415	16.0825	21.961	35.074	7.44379	23.5263
Chr6:99833419-99844469	6	99833419	99844469	19.2427	22.4598	39.6145	6.72495	25.9677
Chr6:100362599-100371520	6	100362599	100371520	31.8191	30.2709	24.6462	11.5781	43.3973
Chr6:100484529-100495181	6	100484529	100495181	28.1746	44.0797	58.6632	21.3836	49.5582
Chr6:102247617-102267792	6	102247617	102267792	21.0294	76.6495	91.0427	76.264	97.2935
Chr6:103726925-103742077	6	103726925	103742077	24.7144	16.4035	12.5209	9.30347	34.0178
Chr6:103742229-103756271	6	103742229	103756271	50.9873	27.2867	22.2528	8.68893	59.6762
Chr6:104276457-104304264	6	104276457	104304264	34.2806	58.062	81.4177	42.8053	77.0859
Chr6:104687441-104705942	6	104687441	104705942	48.9547	45.5393	47.2173	36.5989	85.5536
Chr6:105574061-105593357	6	105574061	105593357	28.6454	53.0843	46.8361	18.1372	46.7827
Chr6:111831387-111852653	6	111831387	111852653	60.8043	25.6035	43.4145	10.0287	70.833
Chr6:111852673-111870095	6	111852673	111870095	71.5285	23.0242	29.1381	9.1783	80.7068
Chr6:111870465-111888800	6	111870465	111888800	55.2142	17.9874	39.7452	11.4219	66.6361
Chr6:114001085-114013064	6	114001085	114013064	33.7612	14.396	27.7911	3.49052	37.2517
Chr6:114013124-114021261	6	114013124	114021261	88.2139	16.6735	46.7959	1.61199	89.8259
Chr6:114021609-114032553	6	114021609	114032553	62.0184	18.756	26.8626	3.96147	65.9799
Chr6:114032753-114041715	6	114032753	114041715	71.8803	9.34922	32.6327	5.68685	77.5671
Chr6:114041717-114044353	6	114041717	114044353	32.2654	3.10091	11.9098	3.2661	35.5315
Chr6:114044394-114054455	6	114044394	114054455	51.966	18.5262	37.0492	4.17157	56.1376
Chr6:114054580-114064734	6	114054580	114064734	44.3055	16.8836	28.2813	8.22522	52.5307
Chr6:114094576-114101585	6	114094576	114101585	23.7215	19.9127	30.623	10.946	34.6675
Chr6:114108782-114121947	6	114108782	114121947	25.8695	32.4746	47.2857	19.574	45.4435
Chr6:114231313-114242020	6	114231313	114242020	83.8949	23.3188	80.7288	6.77449	90.6694
Chr6:114242023-114250087	6	114242023	114250087	80.2279	15.004	73.373	8.30734	88.5352
Chr6:114363900-114374384	6	114363900	114374384	40.5755	17.611	24.0795	4.95907	45.5346
Chr6:114374542-114387548	6	114374542	114387548	17.2724	17.2067	18.3603	6.37678	23.6491
Chr6:114387701-114397995	6	114387701	114397995	21.3199	13.487	20.695	8.7643	30.0842
Chr6:114417308-114426309	6	114417308	114426309	15.8544	19.133	15.6851	4.4174	20.2718
Chr6:114435050-114446709	6	114435050	114446709	20.5583	15.7876	17.4073	4.02589	24.5841
Chr6:114456655-114463899	6	114456655	114463899	19.0842	9.56816	15.6558	5.0624	24.1466
Chr6:114464034-114474718	6	114464034	114474718	38.2894	28.7922	40.142	12.7751	51.0645
Chr6:114474905-114481744	6	114474905	114481744	14.8484	28.2599	13.8077	7.40709	22.2555
Chr6:117065116-117074983	6	117065116	117074983	29.4526	19.0991	48.5253	8.27873	37.7313
Chr6:117406956-117416721	6	117406956	117416721	19.6625	18.6384	27.0729	6.5707	26.2332
Chr6:117554918-117568373	6	117554918	117568373	27.6011	29.347	47.4331	17.5496	45.1507
Chr6:117568466-117575587	6	117568466	117575587	41.2365	75.7002	88.7596	50.8604	92.0969
Chr6:117591118-117599501	6	117591118	117599501	22.6929	77.9897	90.02	69.6818	92.3747
Chr6:118235275-118247162	6	118235275	118247162	23.7924	24.8302	18.5199	5.67349	29.4659
Chr6:118607815-118617623	6	118607815	118617623	14.0875	14.3667	12.9471	3.49914	17.5866
Chr6:118667581-118675538	6	118667581	118675538	20.5055	20.3581	29.7413	7.74953	28.255
Chr6:118735072-118743187	6	118735072	118743187	58.6865	48.7312	77.1346	35.0632	93.7498
Chr6:118743231-118752977	6	118743231	118752977	83.7748	36.9483	59.8353	9.4842	93.259
Chr6:118753009-118760818	6	118753009	118760818	72.1493	17.827	25.9257	5.32263	77.4719
Chr6:118760843-118770840	6	118760843	118770840	52.5314	25.0171	27.5032	7.13383	59.6653
Chr6:118770842-118778244	6	118770842	118778244	27.4246	17.7519	26.4533	4.54573	31.9703
Chr6:119523715-119531550	6	119523715	119531550	21.0867	35.9257	51.1843	14.8561	35.9428
Chr6:121351340-121360959	6	121351340	121360959	38.1678	38.7437	51.7521	27.1307	65.2985
Chr6:121520534-121532220	6	121520534	121532220	10.2405	16.4021	12.6159	3.21403	13.4545
Chr6:122094331-122107680	6	122094331	122107680	34.8763	62.968	71.011	38.8514	73.7276
Chr6:122135509-122157733	6	122135509	122157733	26.0729	74.984	80.7114	67.0238	93.0967
Chr6:122395694-122408617	6	122395694	122408617	26.894	71.7231	80.4358	60.7301	87.6241
Chr6:123068352-123083894	6	123068352	123083894	39.3166	29.284	48.2589	31.5682	70.8848
Chr6:124339680-124355693	6	124339680	124355693	23.0648	31.6259	29.8472	9.74539	32.8102
Chr6:125649685-125657178	6	125649685	125657178	49.1185	63.9395	27.0721	41.1344	90.2529
Chr6:125657180-125666142	6	125657180	125666142	35.2366	61.5686	41.0114	47.121	82.3576
Chr6:125666307-125677887	6	125666307	125677887	34.2356	59.4241	41.8584	48.491	82.7267
Chr6:125677900-125687973	6	125677900	125687973	33.8335	61.5184	33.3932	50.3251	84.1586
Chr6:126096010-126103599	6	126096010	126103599	49.162	22.5395	44.356	6.49302	55.6551
Chr6:126103683-126113206	6	126103683	126113206	66.5513	39.8837	68.3241	24.2257	90.7769
Chr6:126113271-126124175	6	126113271	126124175	59.5214	44.7657	78.1957	30.5786	90.1
Chr6:126124184-126133037	6	126124184	126133037	62.4756	55.8241	86.915	28.291	90.7666
Chr6:126133162-126143408	6	126133162	126143408	24.8298	39.7574	58.1039	24.1414	48.9711
Chr6:126143424-126153536	6	126143424	126153536	40.9711	37.8584	56.8235	20.0623	61.0334
Chr6:126516608-126529871	6	126516608	126529871	36.1832	22.4699	35.2938	7.84248	44.0257
Chr6:126529995-126535452	6	126529995	126535452	8.68058	12.7645	13.6498	1.76282	10.4434
Chr6:126553077-126564692	6	126553077	126564692	40.2607	43.1069	53.7645	30.0019	70.2627
Chr6:126564751-126573024	6	126564751	126573024	32.7522	48.2603	65.7951	32.5622	65.3144
Chr6:126573207-126581737	6	126573207	126581737	36.4565	53.9582	60.2614	25.7624	62.2189
Chr6:126581753-126592057	6	126581753	126592057	32.7539	43.8727	42.408	27.3377	60.0916
Chr6:126592142-126599029	6	126592142	126599029	36.9495	61.7544	71.5603	44.1976	81.1471
Chr6:126617528-126627596	6	126617528	126627596	38.9386	58.017	78.1716	53.8537	92.7923
Chr6:127554171-127562786	6	127554171	127562786	33.4996	22.3682	30.5593	16.4773	49.9768
Chr6:127572246-127582078	6	127572246	127582078	26.9658	39.613	24.1529	11.6492	38.615
Chr6:127582116-127589629	6	127582116	127589629	26.1263	30.961	25.2297	8.71131	34.8376
Chr6:127589715-127600055	6	127589715	127600055	21.2527	27.5656	22.3892	12.1303	33.3829
Chr6:127611452-127619725	6	127611452	127619725	38.8963	34.9361	44.1056	25.1994	64.0958
Chr6:127619726-127629898	6	127619726	127629898	39.2654	40.8543	42.5519	24.6452	63.9106
Chr6:127629911-127640660	6	127629911	127640660	42.0422	46.1325	47.1511	26.9315	68.9737
Chr6:127640755-127655089	6	127640755	127655089	37.2952	46.0405	50.2265	35.1285	72.4237
Chr6:127669670-127679111	6	127669670	127679111	18.4522	23.2125	19.0739	11.5805	30.0326
Chr6:128977209-128993984	6	128977209	128993984	43.1822	33.6962	66.7158	23.3508	66.5329
Chr6:135458946-135470275	6	135458946	135470275	32.5912	76.0147	89.2615	60.2112	92.8024
Chr6:135509378-135524330	6	135509378	135524330	26.351	38.2812	58.3287	14.2775	40.6286
Chr6:135524873-135532694	6	135524873	135532694	14.3974	26.0806	26.3975	3.99749	18.3949
Chr6:135532771-135544415	6	135532771	135544415	12.478	26.1438	31.9943	5.34605	17.824
Chr6:137438211-137445782	6	137438211	137445782	39.094	43.3477	76.9585	27.3887	66.4827
Chr6:138069237-138080228	6	138069237	138080228	40.0223	22.1289	58.4428	8.50885	48.5311
Chr6:138080239-138093761	6	138080239	138093761	25.4559	36.005	32.345	3.15037	28.6062
Chr6:138093834-138103766	6	138093834	138103766	23.9184	21.5183	35.6983	3.36689	27.2853
Chr6:138318473-138332925	6	138318473	138332925	38.7594	60.5069	77.6044	45.3909	84.1503
Chr6:138333130-138351474	6	138333130	138351474	30.8644	68.573	75.738	58.7397	89.604
Chr6:139009281-139024457	6	139009281	139024457	29.5284	15.5961	47.8255	7.05064	36.579
Chr6:139239190-139250376	6	139239190	139250376	9.73502	18.9307	20.0661	2.75212	12.4871
Chr6:139250398-139264819	6	139250398	139264819	60.5491	14.021	34.2576	7.03191	67.581
Chr6:139859645-139870487	6	139859645	139870487	10.1567	15.4642	16.2853	1.62955	11.7863
Chr6:141027137-141037746	6	141027137	141037746	17.8567	29.6284	27.056	8.14815	26.0049
Chr6:141140232-141151459	6	141140232	141151459	29.0927	27.9242	23.7198	12.1225	41.2152
Chr6:141710719-141732090	6	141710719	141732090	31.5034	74.3154	84.407	56.6545	88.1579
Chr6:142790152-142794692	6	142790152	142794692	4.94738	13.8187	13.5645	0	4.94738
Chr6:143393792-143399987	6	143393792	143399987	43.3648	67.1837	38.7306	53.16	96.5248
Chr6:143400034-143408531	6	143400034	143408531	35.7919	76.747	47.0345	53.5986	89.3905
Chr6:143408575-143415115	6	143408575	143415115	31.617	71.55	41.5409	63.3176	94.9346
Chr6:143415136-143423755	6	143415136	143423755	44.8689	59.3676	47.8452	39.9173	84.7862
Chr6:143423756-143431321	6	143423756	143431321	36.8816	65.0681	49.2413	52.4614	89.343
Chr6:143438207-143443930	6	143438207	143443930	41.8681	62.9203	28.4147	24.3975	66.2656
Chr6:143444044-143453946	6	143444044	143453946	39.265	61.2893	49.5537	51.1675	90.4325
Chr6:143454192-143461639	6	143454192	143461639	53.281	59.2495	38.9708	40.5773	93.8584
Chr6:143461665-143471669	6	143461665	143471669	35.9816	63.2272	44.5912	50.7898	86.7714
Chr6:143472052-143479415	6	143472052	143479415	39.9291	52.6454	52.2574	33.641	73.5701
Chr6:143479430-143488238	6	143479430	143488238	26.3413	26.2004	17.1265	10.9136	37.2549
Chr6:143776844-143785967	6	143776844	143785967	51.9461	52.4402	78.2698	41.0224	92.9685
Chr6:143786016-143804041	6	143786016	143804041	65.7787	28.5824	62.4534	16.7673	82.546
Chr6:143804164-143815453	6	143804164	143815453	54.7242	54.9215	78.5315	38.4925	93.2167
Chr6:143815503-143828469	6	143815503	143828469	91.1787	25.3825	60.8915	3.45247	94.6312
Chr6:143828520-143834525	6	143828520	143834525	71.9213	40.6054	47.3797	25.2856	97.2068
Chr6:143834560-143841472	6	143834560	143841472	45.8687	47.1029	26.277	24.6779	70.5466
Chr6:143841574-143851434	6	143841574	143851434	39.2861	34.9544	29.1646	17.8702	57.1564
Chr6:143851474-143859643	6	143851474	143859643	54.4555	41.9558	42.4591	25.1095	79.5651
Chr6:143859659-143866639	6	143859659	143866639	47.2496	49.8057	44.1623	34.6405	81.8902
Chr6:143866711-143879171	6	143866711	143879171	42.1471	52.9686	47.5271	35.407	77.5541
Chr6:143902005-143910373	6	143902005	143910373	41.922	54.917	31.903	34.1369	76.0588
Chr6:143910596-143918408	6	143910596	143918408	37.0209	39.3037	17.597	22.6879	59.7088
Chr6:143918433-143925610	6	143918433	143925610	47.1798	49.7253	26.9186	20.5656	67.7454
Chr6:144575452-144582610	6	144575452	144582610	33.4983	64.1267	28.1977	43.1223	76.6206
Chr6:144600840-144610056	6	144600840	144610056	30.5573	66.8997	43.2898	56.7315	87.2888
Chr6:144687871-144697827	6	144687871	144697827	27.9992	73.5495	49.9883	64.045	92.0442
Chr6:144697859-144711155	6	144697859	144711155	27.3301	58.7045	48.6812	66.8167	94.1469
Chr6:147660693-147674808	6	147660693	147674808	47.0874	14.3077	47.5741	3.64334	50.7307
Chr6:147674817-147688048	6	147674817	147688048	37.8292	25.7757	45.7448	9.64935	47.4786
Chr6:147688241-147699635	6	147688241	147699635	65.8821	23.4768	73.7196	6.92146	72.8035
Chr6:148111813-148125640	6	148111813	148125640	13.2128	18.9946	21.015	7.91829	21.131
Chr7:4201516-4226206	7	4201516	4226206	27.0944	16.0448	28.9215	8.46775	35.5622
Chr7:4694692-4701674	7	4694692	4701674	60.1631	29.0716	73.2638	12.4408	72.6039
Chr7:4701740-4706894	7	4701740	4706894	55.6177	28.9411	75.2231	10.6096	66.2272
Chr7:4707026-4713103	7	4707026	4713103	72.1522	24.4875	78.9783	11.2418	83.394
Chr7:4713120-4720711	7	4713120	4720711	33.3988	20.5225	57.8228	7.75861	41.1574
Chr7:5224938-5238570	7	5224938	5238570	29.8159	52.0452	75.086	53.397	83.2128
Chr7:13152601-13169945	7	13152601	13169945	30.4753	62.0499	74.3858	46.3078	76.7831
Chr7:13170036-13174030	7	13170036	13174030	53.7621	44.3016	77.1483	20.2165	73.9786
Chr7:13174075-13179494	7	13174075	13179494	36.2644	31.8177	79.0598	28.7269	64.9914
Chr7:13528807-13547751	7	13528807	13547751	33.3492	54.7995	73.6165	24.1999	57.5491
Chr7:16398250-16400561	7	16398250	16400561	4.57609	2.2735	1.2463	0	4.57609
Chr7:18548999-18571734	7	18548999	18571734	32.8143	22.7703	57.3154	15.3022	48.1165
Chr7:18738993-18749078	7	18738993	18749078	34.5644	30.8935	45.3648	20.3705	54.9349
Chr7:19012250-19018235	7	19012250	19018235	22.2024	15.3352	17.7567	3.68599	25.8884
Chr7:19507211-19508626	7	19507211	19508626	5.59206	1.15129	1.76909	0.373134	5.96519
Chr7:25799494-25805908	7	25799494	25805908	20.3184	14.5012	17.5906	1.36154	21.6799
Chr7:25805950-25814349	7	25805950	25814349	24.6922	20.2442	18.2251	7.03303	31.7252
Chr7:26797547-26817380	7	26797547	26817380	16.3235	16.1263	25.3412	3.07501	19.3985
Chr7:27356223-27361583	7	27356223	27361583	23.6926	7.9239	4.80441	4.32455	28.0172
Chr7:29071624-29075750	7	29071624	29075750	8.19911	17.9013	9.33371	2.53981	10.7389
Chr7:29226191-29232448	7	29226191	29232448	2.79073	7.21282	7.21728	0	2.79073
Chr7:34502515-34514182	7	34502515	34514182	39.6411	20.4353	46.6201	18.4446	58.0857
Chr7:35941212-35951607	7	35941212	35951607	43.3567	47.0964	70.7755	39.5546	82.9113
Chr7:35951857-35960157	7	35951857	35960157	30.8531	12.5549	23.0022	3.91756	34.7706
Chr7:35960179-35969957	7	35960179	35969957	39.8777	17.1464	43.0218	11.9457	51.8234
Chr7:36328812-36333998	7	36328812	36333998	20.2637	73.6153	90.1042	72.5207	92.7844
Chr7:36334044-36342033	7	36334044	36342033	29.466	72.7792	85.1693	63.0199	92.4859
Chr7:36745370-36754232	7	36745370	36754232	38.3729	20.0143	27.0275	4.97229	43.3452
Chr7:36754266-36764599	7	36754266	36764599	68.8546	24.8599	71.5203	3.67483	72.5294
Chr7:36764681-36770030	7	36764681	36770030	57.7392	14.8022	58.1302	4.18161	61.9208
Chr7:36770117-36773605	7	36770117	36773605	49.2637	14.8493	55.4122	2.20366	51.4673
Chr7:36773653-36783432	7	36773653	36783432	71.6423	38.4654	91.073	15.3542	86.9965
Chr7:36783461-36791746	7	36783461	36791746	62.9119	37.864	75.0453	18.7374	81.6493
Chr7:37325641-37332509	7	37325641	37332509	13.8414	28.4505	18.602	1.22951	15.0709
Chr7:37332554-37337856	7	37332554	37337856	14.7018	13.5263	6.35801	1.70723	16.409
Chr7:37416270-37427099	7	37416270	37427099	37.8142	32.2482	51.3505	13.4877	51.3019
Chr7:37427117-37435707	7	37427117	37435707	41.5994	37.6622	62.3456	29.3554	70.9548
Chr7:37467059-37474218	7	37467059	37474218	20.5545	21.0262	37.6124	3.27733	23.8319
Chr7:37474313-37480280	7	37474313	37480280	58.5244	24.3954	69.1496	4.30522	62.8296
Chr7:37480353-37487605	7	37480353	37487605	64.6443	12.8299	73.3911	4.15359	68.7978
Chr7:37487689-37494187	7	37487689	37494187	44.7757	14.7834	65.2775	3.5454	48.3211
Chr7:37494281-37500058	7	37494281	37500058	34.0254	13.5758	54.639	6.66336	40.6887
Chr7:37500081-37507322	7	37500081	37507322	52.3786	12.9161	73.4838	6.43744	58.8161
Chr7:37507384-37515265	7	37507384	37515265	65.1206	20.0897	71.9806	7.75332	72.8739
Chr7:37515464-37523885	7	37515464	37523885	45.0132	25.963	62.8595	2.53789	47.5511
Chr7:37523898-37532758	7	37523898	37532758	46.9238	25.5278	70.8922	15.7041	62.6279
Chr7:37532798-37543348	7	37532798	37543348	48.2607	24.2019	71.057	10.9473	59.208
Chr7:37543407-37550716	7	37543407	37550716	53.622	25.1589	68.9024	11.7811	65.4031
Chr7:37550764-37561353	7	37550764	37561353	47.3792	29.0309	74.248	14.7963	62.1755
Chr7:37561412-37567214	7	37561412	37567214	52.7504	12.8123	72.1661	5.02527	57.7757
Chr7:37567225-37570855	7	37567225	37570855	58.5234	19.799	70.7134	8.08075	66.6042
Chr7:37570979-37583099	7	37570979	37583099	57.4071	24.2744	70.0627	4.90626	62.3134
Chr7:37583452-37590526	7	37583452	37590526	64.5691	16.9892	74.7389	5.03167	69.6007
Chr7:37590527-37600165	7	37590527	37600165	59.2582	12.7009	74.0371	1.92461	61.1828
Chr7:37600228-37608941	7	37600228	37608941	51.8619	20.5472	67.9306	4.04956	55.9115
Chr7:37609046-37621024	7	37609046	37621024	51.9395	17.7672	76.0415	8.48032	60.4198
Chr7:37625882-37635888	7	37625882	37635888	59.6581	17.0364	63.065	6.58821	66.2464
Chr7:39766232-39778246	7	39766232	39778246	25.0469	34.5042	38.8909	14.0868	39.1338
Chr7:40797036-40810865	7	40797036	40810865	28.959	27.5952	44.0047	8.04796	37.0069
Chr7:40811014-40827830	7	40811014	40827830	26.4759	21.3017	25.9659	7.93125	34.4071
Chr7:40952013-40978647	7	40952013	40978647	64.3048	28.7044	34.547	24.1475	88.4523
Chr7:40979663-41006391	7	40979663	41006391	18.9802	29.8442	19.4241	10.16	29.1402
Chr7:41069418-41090059	7	41069418	41090059	27.93	29.7192	30.9288	10.3474	38.2774
Chr7:41090060-41111559	7	41090060	41111559	39.0361	26.5984	31.0457	10.8421	49.8783
Chr7:41196031-41217544	7	41196031	41217544	36.3455	24.9752	35.9052	16.8317	53.1772
Chr7:41793855-41806701	7	41793855	41806701	38.9947	73.2574	85.2419	48.5251	87.5198
Chr7:42817603-42838906	7	42817603	42838906	27.3168	27.1978	39.084	11.7125	39.0293
Chr7:42839007-42854543	7	42839007	42854543	49.6472	28.3328	65.1086	9.10962	58.7568
Chr7:42854879-42869636	7	42854879	42869636	26.1316	22.6239	23.5283	5.66812	31.7997
Chr7:43078050-43092820	7	43078050	43092820	51.4292	20.8712	68.2667	9.67354	61.1028
Chr7:43685287-43698183	7	43685287	43698183	24.7513	40.2298	38.1096	14.9465	39.6977
Chr7:43908347-43918557	7	43908347	43918557	32.4515	30.9976	35.5077	9.61454	42.0661
Chr7:43943591-43961626	7	43943591	43961626	31.5122	41.0463	29.3334	12.8151	44.3273
Chr7:43961710-43980909	7	43961710	43980909	40.0235	53.1762	38.063	14.5125	54.536
Chr7:43981100-44000053	7	43981100	44000053	43.5177	50.7234	29.7483	13.7528	57.2705
Chr7:44000477-44021458	7	44000477	44021458	39.4144	46.8598	38.6364	14.6849	54.0993
Chr7:48749302-48759539	7	48749302	48759539	47.3639	20.3625	51.1689	7.88522	55.2491
Chr7:48759699-48774218	7	48759699	48774218	31.2302	19.9388	32.3543	8.50314	39.7334
Chr7:48836437-48846891	7	48836437	48846891	24.8273	17.5735	21.4149	3.6086	28.4359
Chr7:48846954-48857921	7	48846954	48857921	13.938	13.3203	20.6045	3.47562	17.4136
Chr7:51743538-51752860	7	51743538	51752860	72.4764	35.8001	41.429	16.7231	89.1994
Chr7:51752882-51765530	7	51752882	51765530	57.2479	31.514	46.8256	25.6091	82.857
Chr7:51765917-51783971	7	51765917	51783971	39.3702	37.4149	47.6248	50.3491	89.7193
Chr7:51783999-51795861	7	51783999	51795861	36.8543	58.799	61.4146	44.2171	81.0714
Chr7:52056331-52082554	7	52056331	52082554	37.7183	28.7509	38.5628	15.1679	52.8862
Chr7:52082583-52100456	7	52082583	52100456	44.0221	37.0185	48.5527	30.417	74.4391
Chr7:52100576-52122771	7	52100576	52122771	33.74	30.5537	59.8988	29.6231	63.3632
Chr7:53251628-53276672	7	53251628	53276672	31.9183	25.5214	43.7556	12.7251	44.6434
Chr7:53744315-53762054	7	53744315	53762054	21.6	20.5968	27.6531	5.17434	26.7743
Chr7:53762063-53778540	7	53762063	53778540	33.6015	30.3143	46.7302	21.26	54.8614
Chr7:53778601-53803054	7	53778601	53803054	49.9539	50.3005	56.8469	21.029	70.9828
Chr7:54190599-54218159	7	54190599	54218159	28.7792	26.3197	34.4284	6.98785	35.767
Chr7:54913852-54925194	7	54913852	54925194	23.125	22.113	24.8649	5.84869	28.9737
Chr7:56577683-56596534	7	56577683	56596534	32.9512	40.0356	66.4865	24.4186	57.3698
Chr7:57875098-57891653	7	57875098	57891653	34.5577	34.6264	39.0649	21.566	56.1237
Chr7:58741105-58756056	7	58741105	58756056	31.4426	31.5079	32.7493	21.8056	53.2482
Chr7:58756535-58770284	7	58756535	58770284	54.8664	63.2344	55.3698	39.0533	93.9197
Chr7:58770421-58785685	7	58770421	58785685	32.0005	75.218	81.5357	63.698	95.6984
Chr7:58785909-58797373	7	58785909	58797373	36.8704	79.7261	80.1183	58.3144	95.1848
Chr7:62592865-62617394	7	62592865	62617394	28.765	53.5982	74.8229	52.4688	81.2338
Chr7:62680198-62687187	7	62680198	62687187	30.3847	47.5471	58.9161	27.0365	57.4212
Chr7:63099280-63111659	7	63099280	63111659	28.955	29.7352	24.5257	20.6816	49.6366
Chr7:63163423-63178909	7	63163423	63178909	15.6439	15.213	17.0734	3.17014	18.8141
Chr7:63193683-63205296	7	63193683	63205296	39.8051	26.946	33.3371	34.5888	74.3939
Chr7:63493636-63508919	7	63493636	63508919	33.4758	78.9738	86.5911	61.1058	94.5816
Chr7:63509170-63528978	7	63509170	63528978	34.7614	70.5201	85.3465	54.9014	89.6628
Chr7:63543436-63555733	7	63543436	63555733	67.6238	51.6172	68.3388	17.348	84.9718
Chr7:63555795-63576645	7	63555795	63576645	26.6583	64.9821	82.5816	53.1454	79.8038
Chr7:63594424-63608967	7	63594424	63608967	34.2329	70.3605	81.3962	56.9076	91.1405
Chr7:63623492-63640512	7	63623492	63640512	33.9638	39.762	55.0931	28.0794	62.0432
Chr7:63657670-63670155	7	63657670	63670155	38.2261	69.8195	81.3654	53.9405	92.1667
Chr7:63670189-63687460	7	63670189	63687460	32.7501	72.8859	80.9461	57.4895	90.2397
Chr7:63687649-63700926	7	63687649	63700926	14.0171	83.1273	92.0634	82.8485	96.8655
Chr7:63707912-63719655	7	63707912	63719655	51.7482	74.2792	84.8441	38.5719	90.3201
Chr7:63751407-63757483	7	63751407	63757483	57.3405	25.4733	38.858	8.54075	65.8812
Chr7:63807025-63815012	7	63807025	63815012	36.7483	40.6516	53.8523	30.6178	67.3661
Chr7:63815180-63825206	7	63815180	63825206	25.4276	18.3364	18.6301	2.70114	28.1287
Chr7:63825208-63837636	7	63825208	63837636	38.2017	24.7825	47.0918	10.0046	48.2063
Chr7:63837668-63853781	7	63837668	63853781	22.5467	15.7317	21.5488	8.00498	30.5517
Chr7:64996092-65008210	7	64996092	65008210	51.2597	28.0158	65.1124	10.2912	61.5509
Chr7:65008392-65019759	7	65008392	65019759	45.4271	16.1007	49.9076	6.45744	51.8845
Chr7:65171360-65187361	7	65171360	65187361	27.3078	37.1285	52.7933	18.9334	46.2412
Chr7:65195746-65205680	7	65195746	65205680	55.4437	57.5507	76.9134	30.6596	86.1033
Chr7:65205715-65212653	7	65205715	65212653	54.9908	44.6443	76.7607	29.0791	84.0699
Chr7:65212658-65226662	7	65212658	65226662	32.192	50.8845	48.5223	32.8077	64.9997
Chr7:65226686-65235517	7	65226686	65235517	8.66327	12.1931	15.9552	1.03745	9.70072
Chr7:65235531-65245179	7	65235531	65245179	25.5955	24.4997	25.2302	3.57312	29.1686
Chr7:65645179-65653294	7	65645179	65653294	27.4888	59.0755	22.982	51.9906	79.4794
Chr7:66043581-66049695	7	66043581	66049695	26.7236	79.1554	81.2055	60.8717	87.5952
Chr7:67840865-67849263	7	67840865	67849263	31.4232	27.888	30.4918	11.9901	43.4133
Chr7:68859835-68875647	7	68859835	68875647	27.6515	19.6508	26.2367	10.7735	38.425
Chr7:68921107-68936601	7	68921107	68936601	28.8499	38.9791	47.103	24.0465	52.8964
Chr7:68936794-68952883	7	68936794	68952883	33.7749	37.0819	57.1362	22.9641	56.739
Chr7:68974923-68983426	7	68974923	68983426	44.6775	21.4364	28.9461	10.5698	55.2473
Chr7:71324743-71343219	7	71324743	71343219	31.5807	31.0302	41.9412	10.817	42.3977
Chr7:71353025-71367358	7	71353025	71367358	23.496	29.0466	22.8405	4.51631	28.0123
Chr7:71468218-71483950	7	71468218	71483950	35.6933	48.0706	83.9373	42.9138	78.6071
Chr7:71538496-71550830	7	71538496	71550830	55.3603	48.4919	75.1627	31.2969	86.6571
Chr7:71588815-71605801	7	71588815	71605801	29.1688	59.6347	75.4374	52.9124	82.0812
Chr7:71672972-71696132	7	71672972	71696132	33.8629	32.4297	36.5062	9.23109	43.094
Chr7:72059546-72074289	7	72059546	72074289	39.2773	54.2471	67.518	23.4194	62.6967
Chr7:72589649-72608178	7	72589649	72608178	46.27	37.0645	64.0933	22.1277	68.3976
Chr7:73657631-73666913	7	73657631	73666913	47.5893	31.388	32.9087	8.60543	56.1947
Chr7:74122184-74137518	7	74122184	74137518	14.4127	16.8704	18.5816	2.29043	16.7031
Chr7:75092380-75105341	7	75092380	75105341	44.9004	40.7505	76.5689	38.4168	83.3172
Chr7:75105508-75116801	7	75105508	75116801	63.3257	29.3935	61.965	7.951	71.2767
Chr7:77850423-77865331	7	77850423	77865331	36.4101	36.9798	63.2309	28.724	65.1341
Chr7:78733929-78746907	7	78733929	78746907	24.1144	24.0935	20.5472	9.08732	33.2017
Chr7:79509067-79515227	7	79509067	79515227	9.36031	1.33867	4.30713	1.04274	10.4031
Chr7:79515296-79518966	7	79515296	79518966	24.0831	8.58409	8.10272	5.2941	29.3772
Chr7:79519074-79530168	7	79519074	79530168	48.7075	44.3917	65.0781	24.3616	73.0691
Chr7:79530247-79535970	7	79530247	79535970	11.5036	10.0618	13.4193	2.79419	14.2978
Chr7:79592655-79599739	7	79592655	79599739	9.37505	14.5537	6.24987	1.62458	10.9996
Chr7:79617968-79626696	7	79617968	79626696	27.9205	18.7438	27.1551	7.47543	35.3959
Chr7:79626795-79636997	7	79626795	79636997	41.5608	26.9565	33.7044	20.9011	62.4619
Chr7:80089947-80096857	7	80089947	80096857	54.7709	45.9034	37.0647	35.9785	90.7494
Chr7:80364563-80370515	7	80364563	80370515	41.5872	53.8839	56.8671	25.5103	67.0975
Chr7:82404915-82417004	7	82404915	82417004	13.5655	25.8396	15.1836	4.28547	17.851
Chr7:82417225-82428960	7	82417225	82428960	16.029	17.9221	10.2173	2.72887	18.7579
Chr7:82429008-82442441	7	82429008	82442441	18.8361	22.7128	18.3938	5.41275	24.2488
Chr7:82544410-82556985	7	82544410	82556985	30.2448	15.6706	25.9502	7.42041	37.6652
Chr7:82557013-82568260	7	82557013	82568260	23.0762	16.0687	12.1258	1.23679	24.313
Chr7:82568354-82582049	7	82568354	82582049	45.7755	24.9997	21.3407	22.4915	68.267
Chr7:82582088-82598039	7	82582088	82598039	56.9038	35.1723	24.9792	21.9446	78.8484
Chr7:82598052-82612206	7	82598052	82612206	59.8596	25.4442	28.6548	12.3949	72.2545
Chr7:82612342-82625524	7	82612342	82625524	20.6007	26.4492	23.7382	6.00923	26.61
Chr7:83639736-83652103	7	83639736	83652103	31.4245	64.8434	69.2801	49.3356	80.7601
Chr7:83768996-83782748	7	83768996	83782748	50.0147	12.614	18.5277	6.5668	56.5815
Chr7:83782919-83792740	7	83782919	83792740	55.6921	21.2855	26.2128	4.08394	59.7761
Chr7:83792756-83802384	7	83792756	83802384	60.5769	12.0981	17.7591	3.74576	64.3226
Chr7:83802539-83812128	7	83802539	83812128	64.4949	19.7106	26.6917	6.44677	70.9417
Chr7:83812154-83828004	7	83812154	83828004	54.7828	23.2867	28.0256	5.49134	60.2741
Chr7:83828042-83844558	7	83828042	83844558	37.7231	19.1203	21.8978	3.99997	41.7231
Chr7:84236387-84249306	7	84236387	84249306	21.2426	18.2073	20.3394	2.74881	23.9914
Chr7:84249445-84262251	7	84249445	84262251	68.1651	16.0998	9.90113	5.22425	73.3893
Chr7:84262268-84274134	7	84262268	84274134	38.7157	23.9951	15.2572	3.03151	41.7472
Chr7:84274232-84286004	7	84274232	84286004	49.7471	14.0945	22.3729	5.36652	55.1137
Chr7:84286080-84299451	7	84286080	84299451	39.5954	13.0239	13.6336	5.62063	45.2161
Chr7:84299699-84312680	7	84299699	84312680	60.91	14.2516	12.1439	3.73244	64.6424
Chr7:84313010-84326577	7	84313010	84326577	41.3327	14.2427	10.0997	4.95003	46.2828
Chr7:84326812-84339730	7	84326812	84339730	21.7544	12.7462	12.6324	2.12026	23.8746
Chr7:84340040-84351081	7	84340040	84351081	72.3633	18.2665	20.7991	9.20526	81.5686
Chr7:84351692-84363342	7	84351692	84363342	71.0848	23.4535	17.2886	6.833	77.9178
Chr7:84363362-84375024	7	84363362	84375024	20.795	24.0056	22.3389	9.4854	30.2804
Chr7:84925033-84954218	7	84925033	84954218	42.0949	58.582	68.229	38.8536	80.9485
Chr7:84954236-84975617	7	84954236	84975617	46.1948	41.4299	77.0246	35.1149	81.3097
Chr7:84975634-84986819	7	84975634	84986819	42.4616	72.6487	77.3788	48.1961	90.6578
Chr7:85124165-85156281	7	85124165	85156281	39.3019	54.215	75.4741	47.2118	86.5138
Chr7:88144896-88167673	7	88144896	88167673	30.1533	38.1362	36.7271	23.181	53.3344
Chr7:89388671-89401767	7	89388671	89401767	35.9577	51.2889	69.8385	47.9563	83.9141
Chr7:89404416-89407740	7	89404416	89407740	49.1166	8.02062	22.7355	8.3132	57.4298
Chr7:89407793-89419775	7	89407793	89419775	47.0191	23.4137	49.7016	11.3412	58.3603
Chr7:89770343-89787806	7	89770343	89787806	36.934	18.6515	32.6946	11.6561	48.5901
Chr7:89787847-89800326	7	89787847	89800326	47.9369	17.4029	28.7124	9.54935	57.4862
Chr7:89800443-89818537	7	89800443	89818537	56.1275	25.397	35.3977	9.75779	65.8853
Chr7:89829166-89838229	7	89829166	89838229	67.3856	41.561	66.8202	26.2113	93.5969
Chr7:89838259-89845921	7	89838259	89845921	51.207	43.1462	64.6489	32.1852	83.3922
Chr7:89846671-89856727	7	89846671	89856727	33.3696	60.735	83.8934	56.3154	89.685
Chr7:92940036-92955301	7	92940036	92955301	27.1505	27.627	37.2622	11.7837	38.9341
Chr7:92979654-92992600	7	92979654	92992600	62.6829	23.2145	50.0542	11.7054	74.3883
Chr7:93722361-93743223	7	93722361	93743223	17.5798	20.0181	32.9247	6.26863	23.8484
Chr7:94339178-94363548	7	94339178	94363548	35.6106	30.6602	28.6925	10.9386	46.5491
Chr7:95920783-95941919	7	95920783	95941919	44.5847	35.6873	58.6513	23.7832	68.3679
Chr7:96428775-96442341	7	96428775	96442341	38.7427	37.2723	70.6771	18.0598	56.8025
Chr7:96442497-96453874	7	96442497	96453874	39.7795	35.599	69.137	17.7069	57.4865
Chr7:96453916-96466982	7	96453916	96466982	28.3324	21.7571	59.1744	10.1999	38.5322
Chr7:96467098-96477207	7	96467098	96477207	19.2411	26.7287	52.7427	7.53596	26.7771
Chr7:96477225-96492643	7	96477225	96492643	37.2648	27.5117	69.7386	17.7653	55.03
Chr7:96492659-96502514	7	96492659	96502514	28.5414	25.8653	67.3376	10.0389	38.5803
Chr7:96502566-96512306	7	96502566	96512306	23.2973	16.3051	44.0697	3.75507	27.0524
Chr7:96699753-96707963	7	96699753	96707963	38.4913	40.7727	70.5566	22.5824	61.0737
Chr7:96708040-96718690	7	96708040	96718690	31.2544	32.3751	66.0038	17.1406	48.3951
Chr7:96718709-96728764	7	96718709	96728764	31.4407	17.9522	52.3648	16.7452	48.1859
Chr7:96739213-96748957	7	96739213	96748957	15.3943	11.5207	21.3487	5.21761	20.6119
Chr7:96749031-96755916	7	96749031	96755916	18.7169	21.8039	49.2068	8.58482	27.3017
Chr7:96755945-96764428	7	96755945	96764428	19.0172	21.209	51.2071	7.76887	26.7861
Chr7:96778740-96788581	7	96778740	96788581	51.1777	37.2682	65.7992	14.5342	65.7119
Chr7:96826964-96835879	7	96826964	96835879	25.1324	20.5031	42.4812	11.8071	36.9395
Chr7:96844650-96856751	7	96844650	96856751	30.3097	34.935	70.9507	18.7628	49.0726
Chr7:96856800-96867247	7	96856800	96867247	23.5236	28.831	61.3471	11.9918	35.5155
Chr7:96867267-96873867	7	96867267	96873867	31.3789	31.5917	66.6387	15.0095	46.3884
Chr7:96873893-96882472	7	96873893	96882472	32.8876	24.6148	58.2712	7.0487	39.9363
Chr7:96882510-96889063	7	96882510	96889063	33.4106	28.662	47.3993	5.50036	38.9109
Chr7:96889093-96895667	7	96889093	96895667	33.0514	19.0383	72.0259	16.5207	49.5721
Chr7:96895681-96903884	7	96895681	96903884	34.7949	25.0481	58.1403	12.4327	47.2276
Chr7:96903889-96910777	7	96903889	96910777	24.8317	25.2886	37.0245	7.05953	31.8912
Chr7:97546220-97555547	7	97546220	97555547	19.5252	85.7898	85.289	75.5918	95.1171
Chr7:99779878-99791085	7	99779878	99791085	30.6266	24.2236	16.7123	6.44778	37.0744
Chr7:103958581-103970739	7	103958581	103970739	38.9608	27.177	32.2227	17.3485	56.3093
Chr7:103970978-103989629	7	103970978	103989629	56.6964	29.0622	41.3383	12.3255	69.0219
Chr7:111782170-111791691	7	111782170	111791691	27.1212	20.1132	59.8512	15.1049	42.2261
Chr7:112122248-112132496	7	112122248	112132496	43.7324	44.1863	53.3914	42.1395	85.8719
Chr7:112132516-112140467	7	112132516	112140467	32.075	50.7202	62.6348	51.7891	83.8641
Chr7:112140784-112150176	7	112140784	112150176	35.9786	40.4781	54.5323	35.4044	71.383
Chr7:112326114-112335112	7	112326114	112335112	28.4316	24.1147	23.8226	6.44886	34.8805
Chr7:112564775-112575055	7	112564775	112575055	36.2793	31.5248	41.5821	8.13481	44.4141
Chr7:112575219-112584642	7	112575219	112584642	50.8223	42.8272	56.8759	21.5985	72.4209
Chr7:115303473-115319309	7	115303473	115319309	24.5424	25.0095	31.5127	11.6144	36.1568
Chr7:115388294-115399150	7	115388294	115399150	24.9804	21.0805	12.6783	6.42451	31.4049
Chr7:115399524-115410987	7	115399524	115410987	28.7201	15.7366	21.208	4.99729	33.7174
Chr7:115410999-115425889	7	115410999	115425889	29.4349	13.71	22.3267	6.3596	35.7945
Chr7:115425893-115442137	7	115425893	115442137	25.5909	20.8084	21.9408	8.68188	34.2727
Chr7:115442298-115452801	7	115442298	115452801	34.6614	13.8562	18.9841	10.1464	44.8078
Chr7:116654777-116666469	7	116654777	116666469	34.2379	37.3517	21.9002	19.4517	53.6896
Chr7:116666778-116680931	7	116666778	116680931	29.4328	23.691	22.4419	17.645	47.0778
Chr7:116680986-116692655	7	116680986	116692655	40.4451	26.5948	23.1771	20.2039	60.6491
Chr7:116703682-116717427	7	116703682	116717427	34.6988	28.6608	23.7689	20.7906	55.4894
Chr7:117129761-117142349	7	117129761	117142349	38.0252	26.8195	47.5994	11.7005	49.7257
Chr7:119491881-119501990	7	119491881	119501990	13.3892	85.071	88.3453	81.5867	94.9759
Chr7:120272216-120291277	7	120272216	120291277	41.3061	34.3323	60.5246	17.9366	59.2427
Chr7:120291995-120301772	7	120291995	120301772	58.9714	50.1667	83.5516	31.5757	90.5471
Chr7:122369238-122380496	7	122369238	122380496	49.4384	43.304	61.0477	21.781	71.2194
Chr7:122380805-122389652	7	122380805	122389652	43.3135	38.0112	68.2128	27.233	70.5465
Chr7:122389796-122402046	7	122389796	122402046	58.3453	38.2472	83.6159	31.1186	89.4639
Chr7:122402171-122409410	7	122402171	122409410	62.0964	38.9607	88.5913	31.7692	93.8656
Chr7:122409471-122416291	7	122409471	122416291	39.8787	33.1442	57.8993	17.4142	57.293
Chr7:122416304-122426913	7	122416304	122426913	44.5321	37.9963	71.9883	25.5601	70.0922
Chr7:122427012-122436696	7	122427012	122436696	47.9901	26.0067	54.313	19.139	67.1291
Chr7:122436725-122445205	7	122436725	122445205	63.5977	43.5365	81.1376	26.4268	90.0245
Chr7:122445218-122455777	7	122445218	122455777	58.7836	43.6874	64.6619	24.2646	83.0483
Chr7:122455784-122464143	7	122455784	122464143	62.8048	46.3521	67.0896	24.9714	87.7762
Chr7:122464406-122471956	7	122464406	122471956	65.7237	31.7455	73.3654	18.8117	84.5354
Chr7:122472041-122481440	7	122472041	122481440	29.2994	35.2619	51.2816	26.6625	55.9619
Chr7:122481512-122488412	7	122481512	122488412	57.9099	43.8867	78.9053	33.9498	91.8598
Chr7:122488489-122495558	7	122488489	122495558	66.3915	49.9528	75.0621	26.7103	93.1018
Chr7:122495683-122505406	7	122495683	122505406	66.5299	46.1432	82.5303	27.8056	94.3355
Chr7:122505436-122513905	7	122505436	122513905	64.7719	45.8199	72.523	26.4506	91.2225
Chr7:122514131-122523132	7	122514131	122523132	55.8614	58.2777	86.4325	34.2774	90.1389
Chr7:122523215-122531729	7	122523215	122531729	53.1822	44.4182	79.4831	39.0266	92.2087
Chr7:122531741-122541392	7	122531741	122541392	41.9712	60.4101	82.6814	42.6285	84.5997
Chr7:122543918-122553739	7	122543918	122553739	58.1281	54.9666	84.9927	32.5529	90.681
Chr7:122554479-122565012	7	122554479	122565012	70.1799	50.9945	78.8772	25.9826	96.1625
Chr7:122565059-122574615	7	122565059	122574615	58.8823	44.257	79.8748	31.2055	90.0878
Chr7:122574636-122582978	7	122574636	122582978	55.5612	49.578	69.4904	34.5422	90.1034
Chr7:122583129-122592816	7	122583129	122592816	56.2182	53.806	79.9404	33.4355	89.6536
Chr7:122592817-122600742	7	122592817	122600742	60.5746	48.9615	82.7212	30.803	91.3776
Chr7:122600760-122610368	7	122600760	122610368	49.3329	49.1122	82.3889	41.0433	90.3762
Chr7:122610452-122622970	7	122610452	122622970	54.1901	37.8283	69.6848	30.0847	84.2748
Chr7:122623133-122631873	7	122623133	122631873	53.59	36.3282	57.8084	20.6555	74.2455
Chr7:122632005-122643348	7	122632005	122643348	30.5879	38.0294	49.1519	14.777	45.3648
Chr7:122843898-122854288	7	122843898	122854288	47.6986	22.2229	34.6955	11.8394	59.538
Chr7:122854629-122863344	7	122854629	122863344	75.0465	34.9639	79.5101	20.5087	95.5553
Chr7:122863366-122874283	7	122863366	122874283	44.7268	51.1573	66.9028	40.105	84.8318
Chr7:122874660-122890965	7	122874660	122890965	35.1819	52.7894	58.2033	33.5725	68.7545
Chr7:122890985-122901913	7	122890985	122901913	35.8037	62.9749	77.1863	48.2628	84.0665
Chr7:123486938-123497449	7	123486938	123497449	55.7484	23.0841	33.5199	14.93	70.6784
Chr7:123510808-123523429	7	123510808	123523429	45.6772	31.3246	14.5383	5.8087	51.4859
Chr7:123523575-123535901	7	123523575	123535901	63.758	26.1156	28.1787	17.5882	81.3462
Chr7:123535909-123552666	7	123535909	123552666	56.7259	28.5324	30.702	16.6359	73.3619
Chr7:123552707-123560465	7	123552707	123560465	52.106	41.194	35.4568	27.5567	79.6627
Chr7:123561159-123577983	7	123561159	123577983	23.0684	31.3029	19.7152	8.92206	31.9905
Chr7:124363296-124380837	7	124363296	124380837	21.1087	14.5871	37.821	10.7377	31.8463
Chr7:124436447-124461594	7	124436447	124461594	79.8612	32.0953	71.5041	13.2505	93.1117
Chr7:124462032-124481628	7	124462032	124481628	69.9381	35.6231	67.5743	12.4421	82.3803
Chr7:124481694-124499290	7	124481694	124499290	55.9839	20.5681	53.5024	7.88099	63.8649
Chr7:125260004-125271259	7	125260004	125271259	42.0262	11.3613	15.1439	1.21592	43.2421
Chr7:125271298-125284353	7	125271298	125284353	59.1544	19.6659	34.8193	10.5113	69.6657
Chr7:125284476-125298453	7	125284476	125298453	48.7186	50.9599	76.9808	36.8948	85.6134
Chr7:125308713-125321295	7	125308713	125321295	21.7598	18.0622	19.4415	4.82361	26.5834
Chr7:125332511-125343218	7	125332511	125343218	38.3335	51.3932	60.8693	36.9049	75.2384
Chr7:125343227-125355143	7	125343227	125355143	55.4184	33.426	57.4443	22.3153	77.7336
Chr7:125355182-125365041	7	125355182	125365041	53.819	44.4411	65.5353	32.3676	86.1866
Chr7:125365137-125378902	7	125365137	125378902	35.208	52.7485	71.2382	41.1112	76.3192
Chr7:125904250-125914621	7	125904250	125914621	49.1169	32.6321	50.6869	9.41601	58.5329
Chr7:125914898-125924304	7	125914898	125924304	60.0646	35.3222	62.2901	19.3212	79.3858
Chr7:125924404-125933736	7	125924404	125933736	24.5451	24.7471	21.4204	6.5611	31.1062
Chr7:126575782-126582896	7	126575782	126582896	13.8505	22.3343	18.9708	7.61211	21.4626
Chr7:129080213-129092098	7	129080213	129092098	75.3185	22.3947	35.2147	11.6115	86.9301
Chr7:129092265-129105750	7	129092265	129105750	72.7961	30.64	57.9572	16.5844	89.3806
Chr7:129215623-129223612	7	129215623	129223612	30.6607	48.1028	47.6868	29.9031	60.5638
Chr7:129497837-129509814	7	129497837	129509814	15.1256	18.5372	16.837	3.11301	18.2386
Chr7:129771007-129778136	7	129771007	129778136	22.0864	45.0439	41.3486	10.6175	32.7039
Chr7:129790537-129801328	7	129790537	129801328	31.7878	67.313	68.4231	41.9139	73.7016
Chr7:129826290-129840487	7	129826290	129840487	36.6977	59.2463	68.2125	31.9065	68.6042
Chr7:130293517-130302649	7	130293517	130302649	29.6601	13.1114	21.5913	4.92116	34.5813
Chr7:130302731-130313818	7	130302731	130313818	50.3699	19.1546	35.5409	7.50821	57.8782
Chr7:130314105-130323880	7	130314105	130323880	24.5555	23.8632	23.1822	3.49741	28.0529
Chr7:130323924-130331226	7	130323924	130331226	22.6007	12.7679	15.8235	3.66452	26.2652
Chr7:130331422-130341483	7	130331422	130341483	48.2319	21.2855	36.2145	0.875604	49.1075
Chr7:131270201-131281504	7	131270201	131281504	39.7684	34.3986	18.0353	18.2649	58.0333
Chr7:131281538-131291463	7	131281538	131291463	42.7107	33.9405	22.631	16.6159	59.3266
Chr7:131291526-131301194	7	131291526	131301194	42.2622	27.5483	17.5407	16.7578	59.02
Chr7:132257448-132266484	7	132257448	132266484	15.0044	15.6394	13.0607	5.9433	20.9477
Chr7:133286718-133296321	7	133286718	133296321	26.5227	25.7699	44.5054	10.7371	37.2599
Chr7:133296456-133308449	7	133296456	133308449	33.6626	58.4977	81.7312	50.9399	84.6025
Chr7:133367417-133378425	7	133367417	133378425	29.8568	51.6066	57.6485	41.074	70.9308
Chr7:133378477-133388133	7	133378477	133388133	49.8553	45.704	41.5737	27.295	77.1503
Chr7:133388151-133398579	7	133388151	133398579	54.6262	20.6098	23.566	8.43072	63.0569
Chr7:133461567-133472255	7	133461567	133472255	6.27824	17.0121	9.28013	0.5	6.77824
Chr7:135411317-135421121	7	135411317	135421121	20.3244	20.1053	32.9649	3.77675	24.1011
Chr7:135421149-135435907	7	135421149	135435907	19.1903	31.0365	28.213	5.72701	24.9173
Chr7:135906357-135922906	7	135906357	135922906	49.6808	28.8613	35.0612	14.0857	63.7665
Chr7:135923219-135938633	7	135923219	135938633	25.9254	32.776	21.9209	16.2096	42.1349
Chr7:137137061-137146339	7	137137061	137146339	30.81	44.3658	53.3659	24.1912	55.0012
Chr7:137846735-137857444	7	137846735	137857444	57.9083	34.2638	76.3342	14.8724	72.7807
Chr7:138209797-138220972	7	138209797	138220972	30.0129	60.4854	73.4335	57.8982	87.9111
Chr7:138221027-138231383	7	138221027	138231383	31.1678	41.1138	62.3105	34.5243	65.6921
Chr7:138231424-138244977	7	138231424	138244977	36.9218	26.8002	43.0194	15.4027	52.3245
Chr7:138281732-138292743	7	138281732	138292743	32.4156	27.255	33.2969	21.1845	53.6001
Chr7:138292755-138306154	7	138292755	138306154	31.2716	24.3428	19.4103	17.9591	49.2308
Chr7:138336905-138348002	7	138336905	138348002	21.1642	18.9042	17.3682	12.4809	33.645
Chr7:138348195-138361696	7	138348195	138361696	31.3792	23.6284	19.438	11.0528	42.432
Chr7:138370622-138380425	7	138370622	138380425	18.2274	17.6234	18.3896	6.27383	24.5012
Chr7:138388448-138397021	7	138388448	138397021	24.2066	28.4806	9.41367	17.7643	41.9709
Chr7:139581608-139582544	7	139581608	139582544	3.82656	3.20916	3.25805	0.150602	3.97716
Chr7:139612819-139618577	7	139612819	139618577	28.1923	75.2058	77.8867	62.77	90.9623
Chr7:139618601-139625392	7	139618601	139625392	24.1888	79.3538	93.1073	69.8023	93.9911
Chr7:140251020-140273634	7	140251020	140273634	28.4346	19.1372	20.9844	7.00073	35.4353
Chr7:140273982-140294664	7	140273982	140294664	29.4885	27.4416	48.5022	12.8327	42.3213
Chr7:140294673-140303898	7	140294673	140303898	65.6541	37.4828	75.3416	9.91154	75.5657
Chr7:140303978-140316604	7	140303978	140316604	40.6189	23.9805	54.5607	11.1549	51.7738
Chr7:142354637-142366314	7	142354637	142366314	35.4435	29.6188	17.6126	16.8457	52.2891
Chr7:142449871-142469303	7	142449871	142469303	31.0829	58.054	43.817	45.4744	76.5573
Chr7:142670319-142691962	7	142670319	142691962	34.6776	21.9045	26.1754	11.809	46.4866
Chr8:6830253-6852840	8	6830253	6852840	33.9654	23.1664	31.8914	11.6945	45.66
Chr8:7230849-7253686	8	7230849	7253686	33.6287	55.48	67.2523	42.9391	76.5678
Chr8:7266032-7289609	8	7266032	7289609	15.1998	22.1121	16.9913	3.75	18.9498
Chr8:10030554-10041449	8	10030554	10041449	16.3812	83.0811	87.6117	76.5053	92.8865
Chr8:10086975-10102886	8	10086975	10102886	33.1998	48.4314	70.5654	26.2333	59.433
Chr8:10645964-10657224	8	10645964	10657224	36.5561	41.3182	51.2216	21.4188	57.9748
Chr8:10839052-10848124	8	10839052	10848124	46.3529	57.2062	75.93	38.1108	84.4637
Chr8:11241260-11249009	8	11241260	11249009	34.1797	62.2759	83.0874	44.7614	78.9411
Chr8:11249035-11257481	8	11249035	11257481	52.0696	53.6431	85.2314	36.1506	88.2201
Chr8:11257506-11267297	8	11257506	11267297	46.8716	55.2659	87.0044	41.2769	88.1485
Chr8:11267312-11274484	8	11267312	11274484	43.0768	45.5402	73.0716	27.1692	70.2461
Chr8:11274544-11280631	8	11274544	11280631	42.269	29.2554	55.6636	24.2448	66.5138
Chr8:11289566-11298547	8	11289566	11298547	53.6205	48.7163	74.8539	28.7852	82.4057
Chr8:11298699-11307177	8	11298699	11307177	33.8814	43.532	72.2089	31.8247	65.7062
Chr8:11329439-11337891	8	11329439	11337891	22.1811	10.2213	49.1781	5.99126	28.1723
Chr8:11337904-11346358	8	11337904	11346358	59.2334	31.6981	84.9542	22.1009	81.3343
Chr8:13727601-13736195	8	13727601	13736195	37.6416	48.6082	55.0151	27.5871	65.2286
Chr8:13736248-13744158	8	13736248	13744158	32.5381	45.4678	50.6087	26.5147	59.0529
Chr8:14846847-14853137	8	14846847	14853137	23.3882	75.2194	89.2616	71.333	94.7212
Chr8:14970727-14975896	8	14970727	14975896	23.9643	39.1767	26.3054	25.4197	49.384
Chr8:14986786-14992642	8	14986786	14992642	32.5687	79.611	52.9932	63.0487	95.6174
Chr8:14997637-15004097	8	14997637	15004097	36.61	68.2394	53.9326	45.5208	82.1308
Chr8:15012076-15017080	8	15012076	15017080	31.2305	31.0475	57.6378	17.0436	48.2741
Chr8:15017096-15024109	8	15017096	15024109	27.0929	29.1638	48.4849	9.54681	36.6397
Chr8:15659465-15672413	8	15659465	15672413	39.2053	45.2612	62.7759	30.5574	69.7627
Chr8:15672464-15689331	8	15672464	15689331	36.2826	42.647	61.0691	25.8362	62.1188
Chr8:15901849-15914755	8	15901849	15914755	21.5929	82.763	85.1127	72.7155	94.3083
Chr8:15914782-15924089	8	15914782	15924089	37.3684	72.696	91.4961	55.3047	92.6731
Chr8:15936831-15953897	8	15936831	15953897	35.3461	71.67	91.8865	52.0825	87.4286
Chr8:15953933-15967953	8	15953933	15967953	34.8309	80.1792	86.7416	55.0216	89.8524
Chr8:15968087-15982207	8	15968087	15982207	36.687	75.4216	88.7625	55.246	91.933
Chr8:15999986-16014173	8	15999986	16014173	20.1517	78.1285	90.4864	69.0278	89.1795
Chr8:16014504-16032935	8	16014504	16032935	18.6623	73.5931	92.6132	73.7317	92.3941
Chr8:16058403-16071408	8	16058403	16071408	17.0872	74.3012	85.3923	75.9699	93.0571
Chr8:16071446-16083140	8	16071446	16083140	19.6649	77.5446	91.3873	73.2874	92.9523
Chr8:16193564-16207880	8	16193564	16207880	17.328	86.9766	94.911	77.5821	94.9101
Chr8:16217639-16231425	8	16217639	16231425	49.3069	25.3586	47.8129	14.9144	64.2213
Chr8:16231626-16248927	8	16231626	16248927	40.2452	28.4182	33.9181	4.38871	44.6339
Chr8:16331180-16353775	8	16331180	16353775	36.1008	15.3588	31.8531	6.28699	42.3878
Chr8:16873143-16893926	8	16873143	16893926	42.1132	26.4511	36.2609	20.6994	62.8126
Chr8:16957840-16976630	8	16957840	16976630	35.6134	45.0052	59.9298	42.8393	78.4526
Chr8:17009217-17026942	8	17009217	17026942	36.9662	67.7476	68.0226	47.5505	84.5167
Chr8:17026944-17043330	8	17026944	17043330	28.2829	65.1156	72.2097	50.2462	78.5292
Chr8:17043582-17058793	8	17043582	17058793	32.0764	80.657	85.3004	62.0857	94.1621
Chr8:17298890-17323748	8	17298890	17323748	22.2683	21.7658	27.1073	11.4246	33.6929
Chr8:17350714-17374925	8	17350714	17374925	39.8744	36.7849	54.8803	18.7475	58.6219
Chr8:17375323-17393786	8	17375323	17393786	30.5891	37.4444	54.412	11.541	42.1301
Chr8:17393948-17409706	8	17393948	17409706	32.825	28.1369	55.4709	11.4501	44.2751
Chr8:17432336-17449877	8	17432336	17449877	34.0441	52.7647	68.0835	33.6458	67.69
Chr8:17547594-17565031	8	17547594	17565031	40.012	46.678	55.3556	17.6361	57.6481
Chr8:19127694-19141449	8	19127694	19141449	18.8914	26.6789	23.3885	8.26224	27.1536
Chr8:21970845-21983740	8	21970845	21983740	18.978	19.3931	32.6849	5.19397	24.172
Chr8:23048155-23055989	8	23048155	23055989	22.5653	24.7185	12.9577	6.8596	29.4249
Chr8:23093890-23099668	8	23093890	23099668	57.3584	58.305	56.0783	24.9351	82.2935
Chr8:23132043-23136842	8	23132043	23136842	42.0878	69.4229	70.8832	41.5094	83.5973
Chr8:23136904-23141209	8	23136904	23141209	48.806	57.4788	43.6219	31.9286	80.7346
Chr8:23141223-23146323	8	23141223	23146323	39.729	46.8064	53.3864	37.72	77.449
Chr8:23146432-23150132	8	23146432	23150132	19.4596	20.7229	28.92	12.3291	31.7886
Chr8:23289353-23297820	8	23289353	23297820	17.5932	20.7455	13.8064	3.23476	20.8279
Chr8:23297941-23310705	8	23297941	23310705	25.9636	28.7909	22.3214	6.69436	32.658
Chr8:23310921-23319759	8	23310921	23319759	14.2262	16.7782	20.8137	5.87021	20.0964
Chr8:23333628-23344338	8	23333628	23344338	49.0643	32.0571	71.8353	32.1394	81.2037
Chr8:23344355-23353153	8	23344355	23353153	44.6198	48.5537	62.0627	23.8634	68.4832
Chr8:23427038-23433987	8	23427038	23433987	66.2333	27.4891	60.5866	4.84925	71.0826
Chr8:23480931-23493136	8	23480931	23493136	20.7761	16.1863	17.3247	4.94518	25.7213
Chr8:24194155-24207625	8	24194155	24207625	31.9562	18.016	34.9206	6.85524	38.8114
Chr8:24220586-24232417	8	24220586	24232417	22.9591	78.9083	87.4245	66.9284	89.8874
Chr8:24582237-24591169	8	24582237	24591169	17.3039	93.2605	94.3664	78.9653	96.2692
Chr8:24596456-24603620	8	24596456	24603620	29.3386	30.5462	26.208	9.23098	38.5696
Chr8:24603624-24610905	8	24603624	24610905	14.5868	28.806	16.1456	5.3502	19.937
Chr8:26184926-26197273	8	26184926	26197273	19.1686	22.693	35.1189	5.44914	24.6177
Chr8:26513279-26522966	8	26513279	26522966	34.1603	44.5836	62.7317	22.0301	56.1905
Chr8:26692540-26703230	8	26692540	26703230	14.5342	28.0322	13.3653	4.65959	19.1938
Chr8:26703629-26712616	8	26703629	26712616	16.4548	19.0411	16.9443	1.74499	18.1998
Chr8:26712657-26724666	8	26712657	26724666	11.5257	25.5942	27.2476	4.22997	15.7557
Chr8:26737809-26747693	8	26737809	26747693	30.6175	25.7501	12.8591	3.74033	34.3578
Chr8:26747766-26759096	8	26747766	26759096	31.007	14.7312	23.1235	9.87381	40.8808
Chr8:26759128-26768006	8	26759128	26768006	43.4611	34.6219	34.4522	9.72193	53.183
Chr8:26768012-26775586	8	26768012	26775586	49.7374	68.4356	63.8254	28.8503	78.5877
Chr8:26775758-26782708	8	26775758	26782708	55.4664	48.0983	55.6386	25.5712	81.0376
Chr8:27365013-27377502	8	27365013	27377502	26.0237	20.3499	17.3052	6.02486	32.0485
Chr8:27388471-27396681	8	27388471	27396681	7.0569	19.0085	20.3393	0.219298	7.2762
Chr8:27710856-27729243	8	27710856	27729243	30.5212	20.1825	20.0185	7.59333	38.1146
Chr8:27749559-27768463	8	27749559	27768463	22.8108	19.0802	30.1267	6.69135	29.5022
Chr8:27768672-27782830	8	27768672	27782830	44.1098	27.3744	33.3088	4.19411	48.3039
Chr8:28260430-28282525	8	28260430	28282525	30.5933	29.804	24.1065	14.3005	44.8938
Chr8:29219485-29223916	8	29219485	29223916	26.2827	9.65064	11.4689	11.6345	37.9172
Chr8:30241867-30263481	8	30241867	30263481	34.2901	18.375	63.6017	4.40217	38.6923
Chr8:30910217-30919443	8	30910217	30919443	20.3233	16.5062	18.483	5.03348	25.3568
Chr8:33439565-33451060	8	33439565	33451060	13.8869	20.9368	28.4852	3.21698	17.1039
Chr8:35212128-35221045	8	35212128	35221045	45.4509	46.1205	69.5948	28.6652	74.1161
Chr8:35221123-35227655	8	35221123	35227655	26.1424	29.892	23.4554	2.02491	28.1673
Chr8:35508966-35522431	8	35508966	35522431	31.5928	79.8993	86.8387	49.9048	81.4976
Chr8:35916612-35926898	8	35916612	35926898	33.6964	30.33	24.7617	3.44228	37.1387
Chr8:35927316-35937291	8	35927316	35937291	23.2611	24.8438	21.4959	2.27612	25.5372
Chr8:35969273-35980817	8	35969273	35980817	12.9513	21.4488	20.6644	2.76018	15.7115
Chr8:35981497-35995095	8	35981497	35995095	55.9089	30.8941	59.5929	17.2278	73.1367
Chr8:35995431-36009416	8	35995431	36009416	39.2901	21.3688	44.1061	8.22122	47.5113
Chr8:36382174-36394115	8	36382174	36394115	19.2348	84.9695	93.6212	73.3423	92.5771
Chr8:36501286-36511744	8	36501286	36511744	31.7957	47.6965	58.1193	8.59849	40.3942
Chr8:36813262-36827279	8	36813262	36827279	41.6271	57.0843	78.8395	28.0729	69.6999
Chr8:36827439-36838604	8	36827439	36838604	17.8521	16.6531	23.4821	3.02754	20.8796
Chr8:37085309-37097224	8	37085309	37097224	24.5008	32.3627	27.4505	9.10159	33.6024
Chr8:37481366-37494011	8	37481366	37494011	18.5875	29.2658	21.4988	11.398	29.9854
Chr8:38485209-38508547	8	38485209	38508547	42.1575	37.9317	64.1315	31.413	73.5705
Chr8:40092289-40114012	8	40092289	40114012	33.6532	54.3791	29.675	39.6446	73.2978
Chr8:40162110-40177447	8	40162110	40177447	33.9515	48.9218	40.8767	24.665	58.6165
Chr8:40177546-40190014	8	40177546	40190014	35.003	57.6179	27.1203	33.6692	68.6722
Chr8:40216850-40229736	8	40216850	40229736	36.2077	41.67	22.526	29.7683	65.9761
Chr8:41426567-41439302	8	41426567	41439302	23.2181	20.7388	49.5924	3.13647	26.3546
Chr8:41439464-41447883	8	41439464	41447883	74.8125	21.7501	68.4545	2.81713	77.6296
Chr8:41448052-41460492	8	41448052	41460492	34.6711	25.3842	49.6224	9.23214	43.9032
Chr8:41899796-41913689	8	41899796	41913689	23.5094	79.5036	85.4458	54.0034	77.5128
Chr8:41913858-41932375	8	41913858	41932375	24.5465	31.3243	30.7247	7.10227	31.6487
Chr8:43886349-43904549	8	43886349	43904549	51.3953	57.5758	78.6521	34.4006	85.7959
Chr8:43931475-43951734	8	43931475	43951734	40.7029	25.3784	37.5834	11.0125	51.7154
Chr8:43951779-43961715	8	43951779	43961715	29.1234	45.8191	31.3729	5.74903	34.8724
Chr8:43961717-43973434	8	43961717	43973434	34.9439	37.6183	37.4368	14.3378	49.2817
Chr8:43973670-43987314	8	43973670	43987314	25.2394	31.7651	38.1644	5.44562	30.685
Chr8:44734897-44745666	8	44734897	44745666	34.0742	19.5891	35.8815	6.62886	40.703
Chr8:44752721-44763043	8	44752721	44763043	45.0167	46.2046	78.5604	34.4234	79.44
Chr8:44763056-44773566	8	44763056	44773566	23.2395	83.5579	86.7028	74.0211	97.2606
Chr8:45398728-45410090	8	45398728	45410090	35.0746	54.1338	44.4067	39.2225	74.2971
Chr8:45850999-45859725	8	45850999	45859725	14.1999	16.114	17.8646	3.85564	18.0556
Chr8:45902056-45910870	8	45902056	45910870	17.3243	18.967	9.90946	7.78817	25.1125
Chr8:56748956-56766251	8	56748956	56766251	50.6552	27.1324	38.9775	10.1822	60.8374
Chr8:56766457-56791427	8	56766457	56791427	41.4193	20.3507	31.1257	14.5941	56.0134
Chr8:57349396-57358205	8	57349396	57358205	28.6464	60.0711	57.4162	41.9413	70.5877
Chr8:57402817-57409516	8	57402817	57409516	4.08602	16.636	10.5914	0	4.08602
Chr8:58445448-58465466	8	58445448	58465466	28.4744	66.4931	62.3381	50.4084	78.8828
Chr8:58465495-58477806	8	58465495	58477806	42.1132	60.9488	82.2557	42.6585	84.7717
Chr8:61981937-61995337	8	61981937	61995337	45.0591	50.5845	39.6858	33.4835	78.5426
Chr8:62012703-62028067	8	62012703	62028067	36.0504	47.7346	52.862	44.1408	80.1912
Chr8:64942558-64947403	8	64942558	64947403	8.57128	6.83537	8.46861	2.25202	10.8233
Chr8:65318837-65328146	8	65318837	65328146	56.9915	70.6098	89.8952	34.1075	91.099
Chr8:65328280-65342376	8	65328280	65342376	50.5639	37.6541	75.0741	28.2823	78.8462
Chr8:65342382-65359954	8	65342382	65359954	49.0052	40.7384	83.8643	31.4591	80.4644
Chr8:65359989-65382137	8	65359989	65382137	33.8864	59.1057	78.2801	45.0313	78.9177
Chr8:65414402-65432434	8	65414402	65432434	51.3824	31.0516	62.3902	10.1565	61.5389
Chr8:70704204-70711291	8	70704204	70711291	14.7368	15.924	29.8902	6.08468	20.8215
Chr8:71090492-71102664	8	71090492	71102664	55.4742	60.3321	69.0388	28.9524	84.4266
Chr8:71102761-71119407	8	71102761	71119407	50.2859	52.9665	62.9424	35.8151	86.101
Chr8:71119444-71144980	8	71119444	71144980	44.8348	44.5167	57.7485	27.8661	72.7009
Chr8:71798830-71814754	8	71798830	71814754	26.825	42.8205	41.648	17.6166	44.4417
Chr8:71814774-71827725	8	71814774	71827725	24.3705	47.4847	38.7521	23.4017	47.7722
Chr8:71827762-71848583	8	71827762	71848583	22.4754	55.4384	65.2221	42.3995	64.8749
Chr8:71848610-71870290	8	71848610	71870290	26.6794	42.8513	53.6593	27.3646	54.044
Chr8:74012788-74032738	8	74012788	74032738	47.9139	49.3099	73.665	39.9471	87.861
Chr8:74646712-74672107	8	74646712	74672107	28.8996	40.5825	45.9276	18.9362	47.8358
Chr8:74672659-74700333	8	74672659	74700333	47.7566	35.0892	44.7119	11.1825	58.9391
Chr8:74700393-74717409	8	74700393	74717409	46.7202	50.8979	69.0288	25.5602	72.2804
Chr8:74760088-74783275	8	74760088	74783275	42.5527	40.6661	45.1677	22.9056	65.4583
Chr8:79827202-79838856	8	79827202	79838856	43.8958	15.2349	21.7065	2.62305	46.5188
[truncated: 2,187 more rows]

## Sheet: cDKO hypo DMRs
Probe	Chromosome	Start	End	Difference (Ehmt1/2 cDKO-Ehmt1/2 Control)	Ehmt2 Control	Ehmt2 cKO	Ehmt1/2 Control	Ehmt1/2 cDKO
Chr1:6727495-6743511	1	6727495	6743511	-38.5371	48.9118	28.0258	42.3166	3.77946
Chr1:8713194-8728423	1	8713194	8728423	-24.9702	49.9107	49.9258	41.2249	16.2547
Chr1:13063112-13071628	1	13063112	13071628	-23.5687	29.7263	25.91	30.5263	6.95767
Chr1:13081229-13090627	1	13081229	13090627	-43.4765	58.7932	36.1431	48.6364	5.15994
Chr1:13090686-13100910	1	13090686	13100910	-35.6782	64.014	47.6927	56.6077	20.9295
Chr1:13100959-13107333	1	13100959	13107333	-26.6643	49.38	38.4412	36.6908	10.0266
Chr1:13373872-13375490	1	13373872	13375490	-6.92406	0.890047	2.72193	7.07026	0.146199
Chr1:15308940-15321876	1	15308940	15321876	-34.5041	80.1145	78.7236	84.4007	49.8966
Chr1:16086577-16093337	1	16086577	16093337	-33.93	64.1432	53.6337	65.4128	31.4828
Chr1:21044600-21053286	1	21044600	21053286	-31.3012	55.6292	30.2088	48.7079	17.4067
Chr1:21053309-21062051	1	21053309	21062051	-32.8505	82.4511	69.5584	76.7866	43.9361
Chr1:21062091-21070190	1	21062091	21070190	-23.6145	62.7249	39.957	51.9001	28.2856
Chr1:21100135-21111165	1	21100135	21111165	-13.857	28.1345	28.5899	20.2604	6.40336
Chr1:21157300-21166515	1	21157300	21166515	-3.16262	13.9515	17.3742	3.16262	0
Chr1:21448859-21461116	1	21448859	21461116	-11.0617	28.6154	24.3685	12.9466	1.88492
Chr1:21556924-21581000	1	21556924	21581000	-8.08076	23.0178	22.1069	9.41409	1.33333
Chr1:21656557-21676129	1	21656557	21676129	-37.0414	60.5869	37.3513	48.7405	11.6991
Chr1:21715915-21742655	1	21715915	21742655	-32.0478	67.1779	61.3916	62.0333	29.9855
Chr1:21805696-21826687	1	21805696	21826687	-34.7849	78.6621	72.8584	74.5428	39.7578
Chr1:22163042-22185505	1	22163042	22185505	-11.5002	21.3282	19.3126	11.5002	0
Chr1:22627512-22644339	1	22627512	22644339	-30.1079	53.5733	50.4121	43.6519	13.544
Chr1:22659614-22678817	1	22659614	22678817	-28.8501	46.9639	44.785	41.0922	12.2421
Chr1:24759093-24767491	1	24759093	24767491	-32.5561	52.7638	48.5931	48.6473	16.0912
Chr1:24953751-24975041	1	24953751	24975041	-10.3546	31.2629	18.3622	12.4274	2.0728
Chr1:24975106-24997546	1	24975106	24997546	-15.0015	32.2633	16.4703	17.7226	2.72109
Chr1:25273222-25284971	1	25273222	25284971	-33.0185	70.1311	54.9343	56.3598	23.3414
Chr1:27875212-27904363	1	27875212	27904363	-22.5932	25.8986	22.4618	22.5932	0
Chr1:35936501-35945763	1	35936501	35945763	-9.88131	17.8428	25.4879	12.5527	2.67139
Chr1:36117405-36125271	1	36117405	36125271	-7.02038	23.8828	18.634	9.63054	2.61015
Chr1:36374690-36384346	1	36374690	36384346	-32.684	80.0948	73.0391	83.1816	50.4976
Chr1:37285281-37297138	1	37285281	37297138	-27.1629	50.9137	24.4708	35.7411	8.57819
Chr1:38348449-38356508	1	38348449	38356508	-26.5928	83.9988	78.986	82.2271	55.6343
Chr1:38365066-38373487	1	38365066	38373487	-41.7565	57.2917	70.8632	68.3257	26.5693
Chr1:38456879-38467524	1	38456879	38467524	-34.5513	64.8906	56.9924	67.642	33.0906
Chr1:38520202-38527999	1	38520202	38527999	-18.3893	91.2232	89.7884	92.2474	73.8581
Chr1:39495607-39503829	1	39495607	39503829	-25.2685	37.7072	35.7933	35.0973	9.82879
Chr1:39578590-39588831	1	39578590	39588831	-5.4343	12.6025	23.2378	5.4343	0
Chr1:39757132-39762551	1	39757132	39762551	-4.21022	14.6684	7.73378	4.21022	0
Chr1:40427341-40440544	1	40427341	40440544	-8.61269	17.2199	17.9368	8.82233	0.209644
Chr1:40717435-40729916	1	40717435	40729916	-12.5751	22.6593	11.8813	16.6678	4.09278
Chr1:40739252-40748222	1	40739252	40748222	-18.8395	22.1596	13.4738	20.6919	1.85248
Chr1:41420257-41431447	1	41420257	41431447	-20.5692	39.6435	25.9247	22.6419	2.07265
Chr1:41782543-41800621	1	41782543	41800621	-10.04	26.6035	15.1996	10.04	0
Chr1:46101444-46123800	1	46101444	46123800	-10.4153	30.4267	30.1402	11.457	1.04167
Chr1:46900909-46913594	1	46900909	46913594	-10.9648	9.50087	15.8604	12.5513	1.58645
Chr1:46979253-46997378	1	46979253	46997378	-27.0214	40.8737	38.6011	34.5667	7.54526
Chr1:47199088-47220577	1	47199088	47220577	-22.0545	44.4261	27.6713	28.0375	5.98303
Chr1:48607546-48633515	1	48607546	48633515	-14.1339	28.3532	19.0377	16.3186	2.18468
Chr1:50235034-50268715	1	50235034	50268715	-18.3069	31.8273	23.3518	21.1843	2.87741
Chr1:50662392-50688709	1	50662392	50688709	-15.7673	35.6614	24.0492	17.2213	1.45406
Chr1:51896527-51905711	1	51896527	51905711	-31.1812	59.1343	54.7772	68.9948	37.8136
Chr1:54484554-54498998	1	54484554	54498998	-27.4945	88.8804	81.9116	85.3384	57.8439
Chr1:54499047-54512371	1	54499047	54512371	-29.8136	82.3015	87.3281	86.7308	56.9172
Chr1:54539207-54552303	1	54539207	54552303	-15.3615	93.266	90.5789	93.6528	78.2913
Chr1:55126951-55131518	1	55126951	55131518	-20.3991	16.8665	11.9699	27.8828	7.4836
Chr1:55174356-55184133	1	55174356	55184133	-29.0707	61.8682	54.8809	41.9706	12.8999
Chr1:55184140-55193256	1	55184140	55193256	-25.7263	56.1491	37.9935	31.7025	5.97619
Chr1:55193306-55202329	1	55193306	55202329	-44.3024	70.5156	62.0776	60.4935	16.1911
Chr1:55202361-55210276	1	55202361	55210276	-27.5718	68.4393	54.5663	38.6833	11.1115
Chr1:56645185-56665043	1	56645185	56665043	-14.9928	27.2059	25.321	16.2404	1.24756
Chr1:56969086-56971552	1	56969086	56971552	-27.2514	38.6356	25.2431	29.9731	2.72169
Chr1:57310690-57326206	1	57310690	57326206	-25.5405	68.577	43.7953	46.6131	21.0726
Chr1:58164605-58177040	1	58164605	58177040	-7.81062	16.8099	17.2729	8.72803	0.917407
Chr1:59457335-59464970	1	59457335	59464970	-39.8312	62.1639	56.224	66.1801	26.3489
Chr1:62459670-62474403	1	62459670	62474403	-10.8292	38.8298	16.166	14.8836	4.05434
Chr1:62696006-62703231	1	62696006	62703231	-10.3091	9.58064	10.6288	12.8028	2.49371
Chr1:63288384-63303464	1	63288384	63303464	-52.2194	84.7778	32.5363	80.166	27.9466
Chr1:64460719-64474374	1	64460719	64474374	-7.25661	7.36291	18.5952	7.25661	0
Chr1:69539099-69551007	1	69539099	69551007	-35.5856	54.2994	47.5358	54.5524	18.9667
Chr1:69551039-69564876	1	69551039	69564876	-34.4564	81.6226	66.7024	85.1194	50.663
Chr1:69611063-69626965	1	69611063	69626965	-31.4091	51.2626	41.344	56.4737	25.0647
Chr1:69627047-69641914	1	69627047	69641914	-32.1609	49.999	29.357	54.8413	22.6804
Chr1:71225821-71243369	1	71225821	71243369	-18.4791	31.179	18.9505	23.3403	4.86111
Chr1:71243440-71254057	1	71243440	71254057	-38.4757	73.7738	81.6994	87.7097	49.234
Chr1:72243911-72249610	1	72243911	72249610	-24.5858	23.3985	19.5626	32.6503	8.06454
Chr1:72758193-72765960	1	72758193	72765960	-5.59211	24.3003	16.6651	5.59211	0
Chr1:74191867-74198446	1	74191867	74198446	-3.3629	19.877	7.29181	3.3629	0
Chr1:74223505-74234722	1	74223505	74234722	-5.5746	20.1042	17.9406	5.5746	0
Chr1:74398690-74407006	1	74398690	74407006	-44.8407	62.7307	30.4552	58.6433	13.8026
Chr1:74407137-74416679	1	74407137	74416679	-44.8117	73.1341	29.0195	62.6895	17.8778
Chr1:74416709-74422652	1	74416709	74422652	-31.6564	59.5871	40.9779	51.0369	19.3806
Chr1:75224897-75234945	1	75224897	75234945	-16.4647	31.6092	17.5867	23.9652	7.50041
Chr1:75235140-75238724	1	75235140	75238724	-19.056	17.3696	5.40665	21.9855	2.9295
Chr1:75238728-75243683	1	75238728	75243683	-44.9678	91.8287	54.9423	89.4793	44.5114
Chr1:75243712-75250196	1	75243712	75250196	-32.1618	93.9295	58.923	86.7022	54.5404
Chr1:76075087-76090413	1	76075087	76090413	-10.7099	25.413	24.0056	12.1283	1.41844
Chr1:77399700-77409779	1	77399700	77409779	-43.8001	52.0358	42.6093	54.5986	10.7984
Chr1:78382922-78392773	1	78382922	78392773	-42.7664	66.1654	41.3585	59.3002	16.5337
Chr1:78392848-78402417	1	78392848	78402417	-33.2513	76.5239	47.7152	66.3731	33.1218
Chr1:78658314-78666350	1	78658314	78666350	-30.272	29.824	33.8626	48.6236	18.3516
Chr1:78741844-78759735	1	78741844	78759735	-8.98687	18.2112	18.0614	9.16902	0.182149
Chr1:82835240-82839647	1	82835240	82839647	-2.47806	7.76686	5.9198	2.47806	0
Chr1:84707361-84717020	1	84707361	84717020	-4.21181	18.6362	11.7765	4.21181	0
Chr1:84886191-84895510	1	84886191	84895510	-26.0616	89.4697	83.9354	85.7276	59.6659
Chr1:84934140-84936991	1	84934140	84936991	-1.88993	2.86867	1.99267	1.88993	0
Chr1:85896561-85905023	1	85896561	85905023	-36.7585	56.8832	29.4428	61.186	24.4275
Chr1:85905128-85911045	1	85905128	85911045	-52.5332	80.9014	58.4309	77.5133	24.9801
Chr1:86300949-86303984	1	86300949	86303984	-16.8114	26.1933	6.68887	19.6698	2.85849
Chr1:86310718-86317904	1	86310718	86317904	-34.9228	65.171	48.4783	60.2928	25.3701
Chr1:86398557-86407785	1	86398557	86407785	-20.2886	38.1302	19	26.1724	5.88384
Chr1:86407838-86417190	1	86407838	86417190	-25.7135	44.7968	32.5134	34.5132	8.79975
Chr1:86585000-86594066	1	86585000	86594066	-35.8633	63.2541	69.8755	71.1806	35.3173
Chr1:86951718-86968207	1	86951718	86968207	-15.4189	89.7686	89.8999	95.6334	80.2145
Chr1:87001563-87017997	1	87001563	87017997	-33.1312	77.8433	59.6094	70.5086	37.3774
Chr1:88256020-88263246	1	88256020	88263246	-19.5005	46.4887	35.7546	35.4415	15.941
Chr1:89927505-89930259	1	89927505	89930259	-20.9369	23.2072	20.2569	29.7343	8.79738
Chr1:90623172-90628250	1	90623172	90628250	-28.1792	90.1638	89.1562	94.4287	66.2495
Chr1:91332201-91339364	1	91332201	91339364	-16.9735	25.7161	14.8795	19.3197	2.34621
Chr1:91832993-91842553	1	91832993	91842553	-4.1939	25.7873	14.9278	4.51802	0.32412
Chr1:94462081-94475424	1	94462081	94475424	-28.0803	31.4806	31.4757	42.8769	14.7965
Chr1:94856907-94879318	1	94856907	94879318	-8.31993	21.9212	9.04253	10.2123	1.89239
Chr1:100903379-100929997	1	100903379	100929997	-21.9921	28.1381	25.3548	30.0893	8.09715
Chr1:102386799-102409144	1	102386799	102409144	-12.2952	28.3282	32.0542	13.0889	0.793651
Chr1:103489005-103517731	1	103489005	103517731	-22.1663	36.1023	24.9863	29.6993	7.53299
Chr1:103873778-103895247	1	103873778	103895247	-12.2857	28.5239	22.9099	13.4999	1.21427
Chr1:105312856-105328877	1	105312856	105328877	-40.8627	73.363	45.8536	58.5723	17.7096
Chr1:105328902-105344022	1	105328902	105344022	-25.9166	55.1924	35.7623	36.8777	10.9611
Chr1:105344091-105355608	1	105344091	105355608	-33.9832	66.6667	30.1008	54.7368	20.7536
Chr1:105896136-105905582	1	105896136	105905582	-7.29107	18.8568	18.2936	8.39776	1.1067
Chr1:106273780-106284793	1	106273780	106284793	-40.6388	88.3468	77.8238	78.0678	37.4291
Chr1:108670502-108698358	1	108670502	108698358	-17.3782	40.1625	28.5993	23.7156	6.33741
Chr1:111302453-111325400	1	111302453	111325400	-17.0494	28.8684	25.6795	19.9457	2.89634
Chr1:112456477-112479021	1	112456477	112479021	-9.71862	23.0563	23.4923	10.1062	0.387597
Chr1:112841448-112865065	1	112841448	112865065	-16.1986	23.631	25.625	17.7425	1.54386
Chr1:115315705-115347401	1	115315705	115347401	-21.5857	24.7552	22.3308	25.7181	4.13239
Chr1:116977072-117011156	1	116977072	117011156	-16.0487	32.1162	15.1426	20.1182	4.06953
Chr1:118835483-118838381	1	118835483	118838381	-37.3007	87.2509	55.2771	82.0672	44.7665
Chr1:118846597-118855617	1	118846597	118855617	-22.4685	85.0461	70.2467	89.2681	66.7995
Chr1:118855631-118863887	1	118855631	118863887	-32.0422	83.5694	60.6508	82.4924	50.4502
Chr1:118863910-118873263	1	118863910	118873263	-33.5416	84.2329	55.73	75.0392	41.4977
Chr1:118891771-118900709	1	118891771	118900709	-30.2472	87.3152	61.5209	78.5216	48.2744
Chr1:120129628-120140129	1	120129628	120140129	-32.738	63.108	39.6271	47.5388	14.8008
Chr1:120140139-120147842	1	120140139	120147842	-28.6493	52.0741	22.7729	37.7721	9.12277
Chr1:120322860-120332224	1	120322860	120332224	-4.3947	11.762	12.0485	4.3947	0
Chr1:120586465-120595198	1	120586465	120595198	-13.4137	22.6614	7.78615	15.8607	2.44709
Chr1:123564860-123593785	1	123564860	123593785	-10.1959	20.4286	7.96875	10.5505	0.35461
Chr1:123760801-123791531	1	123760801	123791531	-10.1644	32.2663	15.6436	10.3958	0.231481
Chr1:126996242-127006125	1	126996242	127006125	-28.1022	54.7473	28.5887	34.8061	6.70392
Chr1:127006205-127019356	1	127006205	127019356	-54.4404	74.1471	81.0362	81.1119	26.6715
Chr1:127019388-127035465	1	127019388	127035465	-27.0287	44.6811	44.8161	44.1067	17.078
Chr1:127035963-127052085	1	127035963	127052085	-40.2106	78.2985	51.7973	56.1222	15.9116
Chr1:127052095-127071443	1	127052095	127071443	-41.8258	64.8486	61.7619	62.5707	20.7449
Chr1:127071646-127090063	1	127071646	127090063	-32.8118	85.4071	72.1826	80.5446	47.7329
Chr1:127215045-127224429	1	127215045	127224429	-45.7484	74.1526	46.3828	66.9217	21.1733
Chr1:127224520-127236293	1	127224520	127236293	-41.4571	73.8567	55.2168	73.7674	32.3103
Chr1:128583598-128591167	1	128583598	128591167	-21.5512	44.9981	25.905	25.7179	4.16667
Chr1:130478286-130491350	1	130478286	130491350	-29.0695	60.1691	65.7343	56.0141	26.9446
Chr1:131041863-131051574	1	131041863	131051574	-9.85688	22.6789	16.9983	11.6878	1.83092
Chr1:131524999-131526633	1	131524999	131526633	-17.5947	18.6328	10.7539	23.6877	6.09305
Chr1:131832600-131842212	1	131832600	131842212	-39.9123	79.4994	30.3732	76.4644	36.552
Chr1:131842335-131847801	1	131842335	131847801	-33.3149	71.1377	35.3181	66.8857	33.5708
Chr1:132233811-132241970	1	132233811	132241970	-29.5021	44.782	27.8982	41.5799	12.0778
Chr1:132536198-132542950	1	132536198	132542950	-34.1105	66.9759	56.62	65.8036	31.6931
Chr1:132542964-132550187	1	132542964	132550187	-29.491	50.7831	40.7904	40.1541	10.663
Chr1:133207984-133214579	1	133207984	133214579	-17.4344	30.1847	13.2991	20.8452	3.41083
Chr1:135272381-135281883	1	135272381	135281883	-22.8564	39.0175	31.2878	33.0949	10.2386
Chr1:135484929-135492384	1	135484929	135492384	-31.5787	67.8196	56.3538	66.1609	34.5822
Chr1:135500748-135507733	1	135500748	135507733	-15.7387	92.2952	89.4707	96.045	80.3063
Chr1:135512692-135521009	1	135512692	135521009	-30.3084	84.3377	75.0639	81.3427	51.0343
Chr1:135537251-135544683	1	135537251	135544683	-18.1513	90.5761	86.4595	91.6574	73.5061
Chr1:135711941-135722079	1	135711941	135722079	-35.288	66.0058	53.3777	64.1108	28.8228
Chr1:135722139-135729325	1	135722139	135729325	-20.1335	77.3402	66.5494	90.9219	70.7884
Chr1:135966130-135974980	1	135966130	135974980	-18.6941	90.8876	91.0515	94.3722	75.6782
Chr1:136880526-136888241	1	136880526	136888241	-43.5897	66.9344	54.0226	64.5242	20.9345
Chr1:136964180-136974383	1	136964180	136974383	-25.3823	49.1594	19.977	39.3662	13.9839
Chr1:137012830-137018814	1	137012830	137018814	-8.67409	24.5086	18.0989	9.08065	0.406565
Chr1:138289128-138304058	1	138289128	138304058	-6.91921	22.5911	19.4129	6.91921	0
Chr1:138513322-138523154	1	138513322	138523154	-45.1436	80.8892	63.4565	80.4947	35.3512
Chr1:138533936-138546808	1	138533936	138546808	-24.8037	82.7881	87.8338	92.8201	68.0165
Chr1:138605386-138614081	1	138605386	138614081	-17.6999	25.8109	24.8017	20.335	2.6351
Chr1:138856677-138867022	1	138856677	138867022	-17.4684	10.9365	6.7248	20.3695	2.90109
Chr1:138964029-138974006	1	138964029	138974006	-28.868	64.7602	64.9339	78.0247	49.1568
Chr1:138991865-139006622	1	138991865	139006622	-19.6323	87.9975	89.7514	91.7284	72.0961
Chr1:139006630-139021488	1	139006630	139021488	-37.7234	58.3328	35.6997	53.6842	15.9608
Chr1:139021513-139038362	1	139021513	139038362	-36.62	72.1358	65.1151	78.6186	41.9986
Chr1:139093965-139103820	1	139093965	139103820	-24.3585	90.3364	81.855	91.1748	66.8163
Chr1:139140142-139150769	1	139140142	139150769	-36.5461	80.5766	65.5104	72.6543	36.1082
Chr1:139287622-139301886	1	139287622	139301886	-19.9832	42.0832	13.8781	23.6869	3.7037
Chr1:139319487-139334272	1	139319487	139334272	-33.0666	41.4465	37.1261	42.3909	9.32438
Chr1:139334288-139347667	1	139334288	139347667	-21.9885	42.7084	21.0858	30.1829	8.19444
Chr1:142418179-142446647	1	142418179	142446647	-25.602	59.2181	26.9329	33.24	7.63801
Chr1:142508482-142540069	1	142508482	142540069	-14.8054	18.0318	12.6566	14.8054	0
Chr1:145331464-145355433	1	145331464	145355433	-6.26759	26.1001	24.9013	7.62562	1.35802
Chr1:151043659-151053203	1	151043659	151053203	-3.39931	18.0907	11.5461	3.39931	0
Chr1:151278877-151289807	1	151278877	151289807	-5.86619	24.7557	20.8749	6.3637	0.497512
Chr1:151950540-151960213	1	151950540	151960213	-30.7611	80.0141	56.0819	77.4647	46.7036
Chr1:151960245-151968405	1	151960245	151968405	-29.4065	84.1136	75.5474	86.5714	57.165
Chr1:151993947-152002442	1	151993947	152002442	-22.7233	90.9968	85.8605	89.897	67.1737
Chr1:152396910-152401344	1	152396910	152401344	-37.0836	40.662	42.3917	61.7991	24.7155
Chr1:152445056-152454114	1	152445056	152454114	-15.5704	44.8935	37.5539	17.2371	1.66667
Chr1:152606855-152612710	1	152606855	152612710	-16.8695	20.6833	25.3897	22.725	5.85548
Chr1:153052686-153061804	1	153052686	153061804	-31.3679	72.6085	67.9798	68.3951	37.0272
Chr1:153061966-153071649	1	153061966	153071649	-24.9458	36.319	20.0959	33.8064	8.86066
Chr1:155098626-155099548	1	155098626	155099548	-2.7027	2.51554	1.58694	3.13551	0.43281
Chr1:155099569-155108760	1	155099569	155108760	-4.68372	6.26096	9.86344	4.68372	0
Chr1:155515396-155524613	1	155515396	155524613	-15.5347	16.9798	6.21258	20.5966	5.06189
Chr1:157631758-157644831	1	157631758	157644831	-6.22487	19.9874	16.9505	6.91931	0.694444
Chr1:159142863-159157835	1	159142863	159157835	-4.43931	18.1076	10.0916	4.43931	0
Chr1:161483235-161499538	1	161483235	161499538	-10.0967	17.3174	11.763	10.7027	0.606061
Chr1:161919329-161931949	1	161919329	161931949	-17.2176	35.62	34.2954	22.5681	5.35051
Chr1:161969153-161974203	1	161969153	161974203	-21.1852	31.7547	24.4744	28.2421	7.05693
Chr1:162476088-162478715	1	162476088	162478715	-38.0974	61.547	56.5261	77.1639	39.0665
Chr1:163245974-163261643	1	163245974	163261643	-12.5399	24.5192	9.56298	14.055	1.51515
Chr1:164254608-164262652	1	164254608	164262652	-25.9796	51.0851	33.7927	46.3892	20.4095
Chr1:166099097-166103589	1	166099097	166103589	-45.6672	62.0404	62.132	57.8	12.1329
Chr1:166163818-166169223	1	166163818	166169223	-21.7301	64.6114	34.8848	36.1633	14.4332
Chr1:166339854-166348860	1	166339854	166348860	-11.5165	22.5384	13.8731	14.3272	2.81075
Chr1:166572494-166581271	1	166572494	166581271	-15.039	85.6967	90.893	90.6149	75.5759
Chr1:167246905-167252283	1	167246905	167252283	-29.1259	35.9936	8.82519	33.1163	3.9904
Chr1:167263689-167270104	1	167263689	167270104	-25.6785	37.753	22.8755	32.4506	6.77205
Chr1:167270138-167276083	1	167270138	167276083	-35.2856	46.5289	21.7149	41.97	6.68438
Chr1:167276113-167283624	1	167276113	167283624	-39.5395	71.6408	58.9652	71.2466	31.7071
Chr1:170140128-170149415	1	170140128	170149415	-28.2341	48.0727	19.6346	38.0592	9.82513
Chr1:170149433-170159404	1	170149433	170159404	-36.2985	81.8682	44.8762	71.3531	35.0546
Chr1:170656233-170662943	1	170656233	170662943	-6.70012	19.8108	20.0375	7.87757	1.17745
Chr1:171053072-171060628	1	171053072	171060628	-18.3243	44.168	33.5743	27.2951	8.97076
Chr1:171460888-171467500	1	171460888	171467500	-23.0839	38.6165	21.9109	32.4237	9.33981
Chr1:171833692-171852577	1	171833692	171852577	-39.1906	43.2567	33.2613	51.5363	12.3457
Chr1:172036745-172046736	1	172036745	172046736	-22.6929	52.1855	16.209	26.9285	4.23566
Chr1:172823475-172843805	1	172823475	172843805	-12.2028	23.9426	20.9504	13.4974	1.29462
Chr1:172889645-172914237	1	172889645	172914237	-11.4124	21.0824	13.8235	11.968	0.555556
Chr1:173510885-173535523	1	173510885	173535523	-14.814	21.2881	22.4877	17.2367	2.42272
Chr1:175707836-175723946	1	175707836	175723946	-16.9797	27.8674	11.7739	24.6435	7.66374
Chr1:176872628-176884866	1	176872628	176884866	-24.705	82.8042	78.8262	81.933	57.228
Chr1:180205870-180214506	1	180205870	180214506	-16.2562	33.1077	27.1355	20.5894	4.33317
Chr1:180214509-180223383	1	180214509	180223383	-20.1974	34.261	28.7802	22.8611	2.66376
Chr1:180768226-180775560	1	180768226	180775560	-20.0559	40.7637	13.0563	27.4461	7.39019
Chr1:181227940-181234080	1	181227940	181234080	-35.1455	88.8554	86.3145	86.0695	50.9239
Chr1:181234241-181244010	1	181234241	181244010	-28.4447	59.1105	45.2883	41.9057	13.461
Chr1:181666374-181678475	1	181666374	181678475	-31.3934	78.7304	53.0963	80.2638	48.8703
Chr1:181693474-181704523	1	181693474	181704523	-29.8691	77.9138	42.4804	75.3785	45.5094
Chr1:181736504-181745890	1	181736504	181745890	-38.4847	64.2642	22.9908	55.9482	17.4634
Chr1:181752970-181759490	1	181752970	181759490	-40.9432	66.0574	22.0555	55.4258	14.4826
Chr1:181759562-181768770	1	181759562	181768770	-40.8858	61.5656	22.7081	47.0234	6.13757
Chr1:181784676-181795757	1	181784676	181795757	-30.113	38.8196	18.1654	37.4691	7.3561
Chr1:181795876-181804297	1	181795876	181804297	-35.9212	57.1483	23.5991	43.8411	7.91995
Chr1:181969742-181981164	1	181969742	181981164	-31.6701	72.7919	72.0698	82.739	51.069
Chr1:182528958-182541824	1	182528958	182541824	-4.04823	16.768	15.1584	4.04823	0
Chr1:182983779-182989488	1	182983779	182989488	-5.9565	16.3374	9.9025	6.6485	0.691996
Chr1:184450572-184457673	1	184450572	184457673	-32.3568	69.1337	56.5412	54.6903	22.3335
Chr1:184830624-184838710	1	184830624	184838710	-49.6737	89.3258	62.1154	83.785	34.1114
Chr1:184838741-184845289	1	184838741	184845289	-33.8325	69.5476	33.4759	56.8576	23.025
Chr1:185191956-185199109	1	185191956	185199109	-12.9321	20.462	19.5292	13.2944	0.362319
Chr1:185199150-185204131	1	185199150	185204131	-18.0645	18.3554	13.516	26.5457	8.48123
Chr1:186546790-186553493	1	186546790	186553493	-19.2183	43.7004	19.6924	28.8814	9.66318
Chr1:188024761-188035090	1	188024761	188035090	-24.0413	48.3916	40.6926	35.5533	11.5119
Chr1:188055789-188065250	1	188055789	188065250	-34.3848	68.8062	53.1159	56.2822	21.8973
Chr1:188651776-188661114	1	188651776	188661114	-38.4543	87.8534	83.9719	82.3411	43.8867
Chr1:188671721-188679276	1	188671721	188679276	-30.2963	62.5757	70.5047	40.0987	9.80235
Chr1:188703052-188712193	1	188703052	188712193	-13.0693	38.3886	28.1648	18.3421	5.2728
Chr1:188937570-188944721	1	188937570	188944721	-44.9238	83.5625	78.2557	83.7385	38.8147
Chr1:189013043-189020284	1	189013043	189020284	-3.85587	7.07068	10.0239	3.85587	0
Chr1:189573000-189580582	1	189573000	189580582	-30.9335	92.4913	91.5294	88.3293	57.3958
Chr1:189580765-189587511	1	189580765	189587511	-38.511	55.161	64.5763	57.6451	19.1341
Chr1:189912490-189917551	1	189912490	189917551	-4.77188	10.0895	15.9987	4.99711	0.225225
Chr1:190147360-190153865	1	190147360	190153865	-6.75807	11.6826	13.6647	7.24116	0.483092
Chr1:190773250-190784106	1	190773250	190784106	-42.824	74.2	57.8446	72.1061	29.2821
Chr1:190792113-190798683	1	190792113	190798683	-17.3895	37.7225	31.0297	20.0901	2.70058
Chr1:190798688-190805766	1	190798688	190805766	-50.3441	70.9442	52.6402	61.0012	10.6571
Chr1:190805806-190812503	1	190805806	190812503	-29.5702	50.5203	31.6998	38.6674	9.09725
Chr1:190812583-190820896	1	190812583	190820896	-35.9635	55.5284	46.4806	50.3272	14.3638
Chr1:190820981-190828059	1	190820981	190828059	-47.722	77.9044	57.8892	66.6773	18.9552
Chr1:190828133-190837128	1	190828133	190837128	-44.7718	74.3666	66.0398	67.1248	22.353
Chr1:190837170-190846708	1	190837170	190846708	-51.2632	83.6307	75.5711	79.0598	27.7966
Chr1:190846830-190852415	1	190846830	190852415	-40.3459	62.8482	50.9636	48.679	8.33308
Chr1:190852485-190859641	1	190852485	190859641	-35.1927	74.049	59.705	60.9653	25.7726
Chr1:190859656-190870020	1	190859656	190870020	-48.09	73.8694	64.8795	73.6501	25.56
Chr1:190870311-190877550	1	190870311	190877550	-27.5127	54.8667	51.8059	45.3487	17.836
Chr1:190887169-190894911	1	190887169	190894911	-14.202	34.8872	23.8846	19.6721	5.47009
Chr1:190894943-190904704	1	190894943	190904704	-28.4563	61.1472	53.9979	46.7677	18.3114
Chr1:191103460-191109609	1	191103460	191109609	-32.8956	47.5338	30.2473	38.09	5.1944
Chr1:191109774-191118647	1	191109774	191118647	-26.3667	49.8984	44.2152	43.3563	16.9895
Chr1:191719066-191727752	1	191719066	191727752	-34.7501	75.4373	74.5827	88.627	53.8769
Chr1:191906805-191907528	1	191906805	191907528	-0.815611	0.791811	1.59971	0.815611	0
Chr1:191941470-191947572	1	191941470	191947572	-4.76196	18.265	17.8254	4.76196	0
Chr1:192070623-192085449	1	192070623	192085449	-19.6755	86.0946	62.9464	86.1109	66.4354
Chr1:195155636-195176391	1	195155636	195176391	-27.8573	42.7163	26.8511	33.3099	5.45259
Chr1:195198738-195220799	1	195198738	195220799	-42.6304	66.5323	46.8109	60.1701	17.5397
Chr2:4925095-4935469	2	4925095	4935469	-29.7915	81.8412	59.4456	75.546	45.7546
Chr2:4935542-4942292	2	4935542	4942292	-47.6889	70.3762	47.8269	69.7643	22.0754
Chr2:4958302-4968735	2	4958302	4968735	-45.9008	78.2573	71.1533	65.9425	20.0418
Chr2:5893552-5897297	2	5893552	5897297	-11.4558	8.05779	5.34975	12.9888	1.53299
Chr2:9243949-9262818	2	9243949	9262818	-50.3166	87.3114	73.3575	79.1963	28.8798
Chr2:9263135-9280478	2	9263135	9280478	-46.722	85.4708	65.2706	74.7243	28.0023
Chr2:9280483-9296941	2	9280483	9296941	-29.5649	90.231	85.447	90.6429	61.078
Chr2:9319275-9332663	2	9319275	9332663	-26.7881	84.4383	77.0344	93.9584	67.1703
Chr2:12198232-12209727	2	12198232	12209727	-22.4989	44.1822	25.1397	28.8061	6.3072
Chr2:12222998-12240291	2	12222998	12240291	-17.6678	43.9186	29.7888	23.8913	6.22349
Chr2:13085797-13096768	2	13085797	13096768	-28.732	92.2936	82.2568	87.1302	58.3982
Chr2:13165881-13175617	2	13165881	13175617	-27.4057	90.1236	83.2824	90.8675	63.4618
Chr2:14619068-14630668	2	14619068	14630668	-34.7919	85.4231	60.5697	72.4697	37.6779
Chr2:16117560-16145084	2	16117560	16145084	-41.148	74.8282	53.0682	66.007	24.859
Chr2:21246698-21257824	2	21246698	21257824	-15.1932	27.4211	13.9818	19.6804	4.48718
Chr2:24545954-24559948	2	24545954	24559948	-31.7421	82.9989	77.8266	83.8082	52.0661
Chr2:25399446-25403155	2	25399446	25403155	-28.7519	38.7353	24.4971	43.608	14.8562
Chr2:25482272-25490668	2	25482272	25490668	-15.5391	21.3275	16.7973	20.0251	4.486
Chr2:25490942-25500162	2	25490942	25500162	-31.282	71.8591	42.6893	63.7919	32.5099
Chr2:26049794-26059657	2	26049794	26059657	-25.258	58.6276	43.0551	48.8108	23.5528
Chr2:26091757-26101674	2	26091757	26101674	-24.7253	86.4601	78.8994	93.8069	69.0816
Chr2:26112065-26121996	2	26112065	26121996	-23.4726	52.0511	32.4855	41.2745	17.8019
Chr2:26604072-26608067	2	26604072	26608067	-26.7235	21.2033	28.3698	38.3393	11.6157
Chr2:27342224-27352047	2	27342224	27352047	-26.7748	60.7642	45.6806	46.2768	19.502
Chr2:27352088-27361684	2	27352088	27361684	-26.8136	57.2343	41.2483	36.464	9.65047
Chr2:27361721-27370307	2	27361721	27370307	-41.5033	66.4402	63.0257	53.9096	12.4063
Chr2:27370376-27377709	2	27370376	27377709	-30.9526	62.1532	50.4381	48.534	17.5814
Chr2:27385737-27394570	2	27385737	27394570	-29.8678	54.152	33.6362	37.0775	7.20964
Chr2:27501294-27509974	2	27501294	27509974	-24.3212	56.2852	52.4329	45.3583	21.0371
Chr2:27578792-27588542	2	27578792	27588542	-6.68701	27.3727	23.116	7.60078	0.913771
Chr2:27915984-27924591	2	27915984	27924591	-4.6868	12.7589	16.3767	4.6868	0
Chr2:30121619-30125158	2	30121619	30125158	-19.0257	18.721	10.5191	26.4981	7.47235
Chr2:30178567-30186693	2	30178567	30186693	-22.2006	43.8577	19.7672	32.7337	10.5331
Chr2:30186794-30194044	2	30186794	30194044	-53.2758	89.8771	53.3887	89.8026	36.5269
Chr2:30194067-30204914	2	30194067	30204914	-25.2412	33.7153	26.5689	33.3763	8.13509
Chr2:30237371-30238561	2	30237371	30238561	-3.54423	3.42686	1.43803	3.84185	0.297619
Chr2:30650123-30657778	2	30650123	30657778	-6.17272	19.3843	17.1672	7.17248	0.999758
Chr2:30828650-30837137	2	30828650	30837137	-33.8516	83.2797	79.8113	84.9348	51.0832
Chr2:30870140-30876576	2	30870140	30876576	-16.2018	29.5049	26.9892	22.1356	5.93383
Chr2:30876734-30882984	2	30876734	30882984	-45.9878	85.923	74.1911	83.9238	37.936
Chr2:31049223-31053489	2	31049223	31053489	-35.968	85.9976	76.9253	61.3259	25.358
Chr2:31060864-31067279	2	31060864	31067279	-37.8456	92.8306	78.3231	80.2846	42.4391
Chr2:31067280-31075883	2	31067280	31075883	-28.7262	87.1324	81.9845	80.2392	51.513
Chr2:31096219-31102137	2	31096219	31102137	-35.7383	59.5059	36.5705	39.8145	4.07626
Chr2:31458105-31462427	2	31458105	31462427	-18.6236	32.3875	12.474	27.3298	8.70626
Chr2:31627607-31635453	2	31627607	31635453	-10.8124	18.1039	10.4925	14.2125	3.4001
Chr2:31753003-31760359	2	31753003	31760359	-38.4095	72.475	66.7285	76.1814	37.772
Chr2:31935759-31946086	2	31935759	31946086	-3.65653	12.8573	13.2127	4.21209	0.555555
Chr2:32133824-32140597	2	32133824	32140597	-8.57554	5.7067	10.0451	8.57554	0
Chr2:32167267-32173986	2	32167267	32173986	-32.9323	53.2575	28.6613	45.7693	12.837
Chr2:32174007-32180398	2	32174007	32180398	-20.8597	44.0335	24.677	27.8675	7.00781
Chr2:32180475-32186583	2	32180475	32186583	-41.3712	70.0117	51.6414	61.6095	20.2383
Chr2:32186634-32193370	2	32186634	32193370	-44.47	81.2549	62.2642	74.0594	29.5893
Chr2:32193407-32199289	2	32193407	32199289	-50.4033	91.9303	74.3593	90.2088	39.8056
Chr2:32199308-32204296	2	32199308	32204296	-55.4376	90.8727	68.2908	89.9173	34.4797
Chr2:32204318-32210530	2	32204318	32210530	-39.7365	94.3047	74.4781	87.7962	48.0597
Chr2:32210584-32214365	2	32210584	32214365	-44.0597	64.0533	37.5521	53.2142	9.15449
Chr2:32223421-32229336	2	32223421	32229336	-43.1305	82.9322	69.6567	80.7808	37.6503
Chr2:32362975-32366687	2	32362975	32366687	-10.8016	12.383	10.7206	13.7046	2.90299
Chr2:32366730-32374074	2	32366730	32374074	-26.2226	35.9791	18.6628	34.6369	8.41429
Chr2:32374243-32379934	2	32374243	32379934	-30.3382	54.8201	34.575	50.3694	20.0312
Chr2:32713664-32720096	2	32713664	32720096	-21.7734	43.1114	32.1324	35.5913	13.8179
Chr2:32760716-32766743	2	32760716	32766743	-26.6874	84.2746	79.9571	86.5348	59.8474
Chr2:32766852-32772644	2	32766852	32772644	-48.9666	76.8484	54.4892	71.7123	22.7458
Chr2:32772801-32776506	2	32772801	32776506	-7.18409	11.0141	7.5333	9.61583	2.43175
Chr2:33631691-33636405	2	33631691	33636405	-6.57625	6.53102	3.34805	6.76565	0.189394
Chr2:34207654-34224286	2	34207654	34224286	-31.0641	82.3497	66.111	81.2802	50.2161
Chr2:34329136-34348984	2	34329136	34348984	-26.2007	76.5548	63.1211	81.0367	54.836
Chr2:34913018-34914305	2	34913018	34914305	-44.6737	43.1429	35.0435	59.2504	14.5767
Chr2:35093923-35103656	2	35093923	35103656	-43.356	68.8515	30.7308	65.0626	21.7066
Chr2:35544846-35552977	2	35544846	35552977	-5.27721	14.5782	14.9413	5.63564	0.358423
Chr2:36055893-36067553	2	36055893	36067553	-22.8916	36.277	18.122	26.608	3.71639
Chr2:36968700-36986282	2	36968700	36986282	-17.7679	33.8039	31.3149	25.9424	8.17451
Chr2:38354698-38357073	2	38354698	38357073	-22.6065	17.5987	11.9756	23.7515	1.145
Chr2:38560964-38569722	2	38560964	38569722	-19.6772	16.2814	15.8886	28.4998	8.82261
Chr2:38569761-38577692	2	38569761	38577692	-39.515	67.1994	45.1754	75.5071	35.9922
Chr2:38925267-38926616	2	38925267	38926616	-3.65563	1.16971	2.65154	3.65563	0
Chr2:39329824-39355976	2	39329824	39355976	-7.266	20.168	20.0148	8.1207	0.854701
Chr2:40056558-40090890	2	40056558	40090890	-40.4519	27.7981	26.1012	62.5865	22.1345
Chr2:41367368-41389078	2	41367368	41389078	-5.932	14.8569	15.3358	5.932	0
Chr2:41967433-41987938	2	41967433	41987938	-28.1579	32.4975	30.2626	39.5467	11.3889
Chr2:43816828-43836028	2	43816828	43836028	-10.7688	26.4829	17.2618	12.0034	1.23457
Chr2:44981239-44989868	2	44981239	44989868	-9.57373	26.094	11.1214	10.8264	1.25264
Chr2:47799006-47829058	2	47799006	47829058	-18.5468	36.3136	31.0468	28.6373	10.0906
Chr2:50119547-50131135	2	50119547	50131135	-34.2649	53.4155	32.677	50.9986	16.7338
Chr2:51078817-51086471	2	51078817	51086471	-7.12488	9.28116	24.3161	7.61507	0.490196
Chr2:51610562-51621424	2	51610562	51621424	-25.2095	42.4466	33.1661	29.5573	4.34783
Chr2:52742489-52752386	2	52742489	52752386	-20.445	26.1757	21.8811	29.014	8.56899
Chr2:56037298-56057580	2	56037298	56057580	-14.2877	40.0998	29.6744	15.7355	1.44781
Chr2:56077935-56099584	2	56077935	56099584	-15.464	36.7256	19.8742	23.1359	7.67196
Chr2:56099622-56117658	2	56099622	56117658	-9.50997	17.8989	14.403	9.50997	0
Chr2:56343274-56364147	2	56343274	56364147	-23.1564	44.5426	39.5896	25.3786	2.22222
Chr2:57291510-57299907	2	57291510	57299907	-16.9008	21.3735	28.1376	20.6151	3.71429
Chr2:57299909-57308877	2	57299909	57308877	-22.5111	44.2463	24.8477	26.0199	3.50877
Chr2:57322558-57333110	2	57322558	57333110	-32.5793	57.6175	38.6067	41.8018	9.22247
Chr2:57333237-57339632	2	57333237	57339632	-14.0136	29.8132	11.8361	17.3314	3.31781
Chr2:57339956-57350180	2	57339956	57350180	-30.3417	47.4481	13.8435	39.5699	9.22824
Chr2:57350231-57358923	2	57350231	57358923	-45.9549	72.6018	27.5295	59.4415	13.4866
Chr2:57359017-57367522	2	57359017	57367522	-38.1028	59.2725	25.4995	50.9179	12.8151
Chr2:58159406-58170213	2	58159406	58170213	-7.94192	17.3477	12.8781	7.94192	0
Chr2:58850298-58868563	2	58850298	58868563	-33.9826	68.2589	73.9166	64.1992	30.2167
Chr2:58901840-58909324	2	58901840	58909324	-24.2459	83.6843	86.2397	89.4354	65.1895
Chr2:58921074-58936812	2	58921074	58936812	-27.3235	88.9548	85.762	87.2442	59.9206
Chr2:58975921-58985671	2	58975921	58985671	-34.2553	61.8787	51.1017	50.1181	15.8628
Chr2:59548365-59558979	2	59548365	59558979	-21.6365	40.636	23.5511	27.5755	5.93906
Chr2:61007059-61021129	2	61007059	61021129	-8.39975	25.0167	15.8008	8.39975	0
Chr2:61297258-61312065	2	61297258	61312065	-11.1319	26.4745	17.4648	12.9602	1.82836
Chr2:62443779-62456080	2	62443779	62456080	-5.48062	16.1563	10.9415	5.48062	0
Chr2:68486592-68499596	2	68486592	68499596	-8.11041	30.2659	20.5134	9.0267	0.916287
Chr2:68757602-68770932	2	68757602	68770932	-20.8446	51.6975	15.4042	26.2486	5.40404
Chr2:68901374-68912707	2	68901374	68912707	-30.4409	71.4227	55.7452	70.1781	39.7372
Chr2:69670793-69679321	2	69670793	69679321	-33.5526	70.6038	57.629	51.1231	17.5706
Chr2:69679494-69687246	2	69679494	69687246	-27.3925	78.2934	63.3965	64.4158	37.0233
Chr2:71467513-71477357	2	71467513	71477357	-31.8468	45.3804	40.6823	48.7852	16.9384
Chr2:71496766-71504996	2	71496766	71504996	-49.7501	61.7934	41.9025	65.8187	16.0685
Chr2:71511499-71518151	2	71511499	71518151	-18.4033	90.416	78.5709	94.0002	75.5969
Chr2:71518152-71525616	2	71518152	71525616	-36.6433	59.2843	31.8047	52.1249	15.4816
Chr2:71746132-71755226	2	71746132	71755226	-6.46526	33.6081	12.8128	7.01171	0.546448
Chr2:71922830-71936338	2	71922830	71936338	-20.5612	22.5736	20.8206	22.8699	2.30864
Chr2:72027123-72036599	2	72027123	72036599	-33.1895	55.1681	31.3432	46.3098	13.1202
Chr2:72036717-72044058	2	72036717	72044058	-14.3041	35.2432	24.065	22.0761	7.77193
Chr2:72044070-72051281	2	72044070	72051281	-19.7289	37.0222	17.6725	22.1336	2.40469
Chr2:72070633-72080952	2	72070633	72080952	-19.7038	44.3789	19.1252	27.7213	8.01754
Chr2:72221287-72227501	2	72221287	72227501	-42.7927	82.1011	23.4568	66.4876	23.6949
Chr2:72311463-72321166	2	72311463	72321166	-25.7853	90.5042	81.3631	89.9793	64.194
Chr2:72321283-72328118	2	72321283	72328118	-36.0025	77.0697	76.7846	81.5414	45.5389
Chr2:72352471-72364720	2	72352471	72364720	-34.4786	85.6314	66.8029	74.3071	39.8284
Chr2:72388914-72396247	2	72388914	72396247	-17.3406	88.3517	90.2971	93.8616	76.521
Chr2:72396322-72402538	2	72396322	72402538	-15.539	89.1325	86.1273	95.0286	79.4896
Chr2:73561262-73567387	2	73561262	73567387	-18.6763	31.5777	22.5424	26.4636	7.78731
Chr2:73768058-73775165	2	73768058	73775165	-4.59767	6.11599	4.37762	4.59767	0
Chr2:75112784-75119955	2	75112784	75119955	-2.59002	15.5277	13.4632	2.59002	0
Chr2:77443809-77451342	2	77443809	77451342	-30.944	53.8601	31.6963	45.5104	14.5664
Chr2:77451361-77460171	2	77451361	77460171	-17.6953	36.3792	30.9996	21.4549	3.75959
Chr2:77468540-77475165	2	77468540	77475165	-36.354	58.7869	40.1091	50.9322	14.5782
Chr2:77492566-77501986	2	77492566	77501986	-29.8153	70.4526	44.7623	71.848	42.0327
Chr2:78710591-78724089	2	78710591	78724089	-9.92264	16.2393	15.073	11.2628	1.34017
Chr2:80026531-80039809	2	80026531	80039809	-37.3154	60.1755	61.9275	55.444	18.1286
Chr2:81262171-81283267	2	81262171	81283267	-14.8211	33.3902	23.5203	15.954	1.13287
Chr2:82783609-82807161	2	82783609	82807161	-13.4559	29.2671	17.6562	16.9884	3.53248
Chr2:83724746-83730058	2	83724746	83730058	-29.1156	22.3971	13.4022	31.8559	2.74024
Chr2:83730083-83739151	2	83730083	83739151	-63.0823	92.1777	70.4574	86.5891	23.5067
Chr2:83739368-83748474	2	83739368	83748474	-42.1773	92.7446	85.3085	94.8926	52.7153
Chr2:83748564-83759144	2	83748564	83759144	-20.3349	91.4881	86.8723	92.0431	71.7082
Chr2:83759163-83771176	2	83759163	83771176	-32.7287	90.9321	85.3984	93.1072	60.3785
Chr2:83771183-83785067	2	83771183	83785067	-40.2051	93.4885	90.6865	94.9479	54.7428
Chr2:83785134-83793411	2	83785134	83793411	-49.8179	95.6909	78.6109	91.5422	41.7243
Chr2:83793417-83801874	2	83793417	83801874	-40.364	82.5962	72.439	78.1844	37.8204
Chr2:84659116-84666429	2	84659116	84666429	-19.9257	29.3374	22.2141	25.9438	6.01808
Chr2:84666456-84671618	2	84666456	84671618	-52.8648	71.3427	51.2659	74.8883	22.0235
Chr2:84993158-85006607	2	84993158	85006607	-33.5152	85.2991	70.7707	84.8602	51.345
Chr2:85032260-85037499	2	85032260	85037499	-13.8366	12.6323	7.78038	17.2967	3.4601
Chr2:85341499-85365327	2	85341499	85365327	-31.5647	58.7853	37.6283	48.6172	17.0525
Chr2:85433152-85455296	2	85433152	85455296	-9.87378	18.6046	11.1612	10.8262	0.952381
Chr2:85619694-85644062	2	85619694	85644062	-19.9828	44.0081	22.5262	24.6605	4.67775
Chr2:87306037-87326368	2	87306037	87326368	-25.4868	41.3558	35.1286	34.1985	8.71169
Chr2:87962776-87986126	2	87962776	87986126	-32.0255	33.1586	35.6203	41.8609	9.83538
Chr2:89310069-89333365	2	89310069	89333365	-20.0131	41.8013	30.1416	26.3469	6.33381
Chr2:89965465-89992743	2	89965465	89992743	-17.6196	20.777	22.3284	21.9967	4.3771
Chr2:90020557-90048632	2	90020557	90048632	-10.6315	28.7929	10.8528	12.9173	2.28583
Chr2:90798864-90805849	2	90798864	90805849	-19.2325	35.4654	36.3484	27.8202	8.58763
Chr2:90805868-90815994	2	90805868	90815994	-20.5583	30.8068	25.2892	25.6255	5.06717
Chr2:90886112-90889817	2	90886112	90889817	-9.15825	6.68616	8.02468	11.7092	2.55094
Chr2:91019255-91032706	2	91019255	91032706	-47.9715	83.349	82.8133	76.5423	28.5708
Chr2:91032795-91040445	2	91032795	91040445	-29.8983	65.6036	67.529	56.0818	26.1835
Chr2:91040487-91046820	2	91040487	91046820	-31.1839	70.2551	59.2193	59.2688	28.0849
Chr2:91317247-91328406	2	91317247	91328406	-18.2228	29.5743	24.1691	23.8503	5.62755
Chr2:91328466-91341994	2	91328466	91341994	-26.8672	28.6982	23.3382	34.4963	7.62908
Chr2:91342198-91356627	2	91342198	91356627	-46.8212	77.8495	50.3995	70.5253	23.7041
Chr2:91356770-91372965	2	91356770	91372965	-33.9487	63.662	42.1511	53.2781	19.3295
Chr2:91383991-91396842	2	91383991	91396842	-50.4978	70.5213	41.7888	72.1724	21.6745
Chr2:91396936-91412325	2	91396936	91412325	-30.5358	55.4808	30.0699	47.4802	16.9444
Chr2:91412397-91426073	2	91412397	91426073	-25.8193	51.4363	30.8695	41.3972	15.5779
Chr2:92457336-92460145	2	92457336	92460145	-18.6436	15.6327	8.94566	22.2613	3.61773
Chr2:92576848-92587575	2	92576848	92587575	-7.65287	13.8782	19.9198	8.39199	0.739116
Chr2:93430733-93441144	2	93430733	93441144	-6.21062	21.6803	15.8115	7.59428	1.38366
Chr2:93961736-93971585	2	93961736	93971585	-36.9	69.9526	66.065	59.0727	22.1727
Chr2:96373398-96392689	2	96373398	96392689	-20.7957	25.8855	13.3805	25.4661	4.67047
Chr2:98479355-98507251	2	98479355	98507251	-16.3651	28.4279	34.9657	18.7669	2.40181
Chr2:99174400-99203989	2	99174400	99203989	-14.2394	25.2301	19.8757	15.2198	0.980392
Chr2:99204551-99226337	2	99204551	99226337	-23.8344	52.7427	51.0554	39.662	15.8276
Chr2:99506482-99530740	2	99506482	99530740	-20.5104	51.7229	25.5387	34.4852	13.9748
Chr2:100195541-100225873	2	100195541	100225873	-14.3733	28.2726	25.5979	16.4092	2.03588
Chr2:101404614-101425847	2	101404614	101425847	-7.5901	15.3595	16.0339	7.5901	0
Chr2:101570519-101581942	2	101570519	101581942	-24.4603	40.9223	19.1054	35.2445	10.7842
Chr2:101958526-101966018	2	101958526	101966018	-10.6323	35.8339	18.6946	13.763	3.1307
Chr2:102018415-102026445	2	102018415	102026445	-19.7115	52.6568	30.1298	30.2337	10.5222
Chr2:102044144-102052084	2	102044144	102052084	-28.8267	37.7553	21.5497	37.39	8.56332
Chr2:102052111-102058691	2	102052111	102058691	-38.4791	72.1227	55.2284	73.5878	35.1087
Chr2:102088261-102097072	2	102088261	102097072	-32.1295	58.7504	32.5954	49.5809	17.4514
Chr2:102135965-102144859	2	102135965	102144859	-16.4271	47.0449	21.7122	23.0339	6.60679
Chr2:102144901-102153143	2	102144901	102153143	-24.617	53.8409	25.7768	34.9242	10.3072
Chr2:102153275-102163235	2	102153275	102163235	-18.5697	32.4317	16.9722	25.0646	6.49493
Chr2:102799100-102816623	2	102799100	102816623	-11.8319	15.4891	14.8304	13.9883	2.15647
Chr2:103453311-103458000	2	103453311	103458000	-4.72165	21.1176	18.2284	5.2267	0.50505
Chr2:104096326-104108358	2	104096326	104108358	-11.6766	35.3755	22.0902	13.456	1.77933
Chr2:104816057-104817024	2	104816057	104817024	-5.58172	0.890882	4.39933	5.69173	0.110011
Chr2:105850305-105861467	2	105850305	105861467	-26.6901	77.1541	86.157	80.9779	54.2878
Chr2:108033023-108048118	2	108033023	108048118	-29.499	67.5642	40.3605	39.3165	9.81748
Chr2:109110119-109124435	2	109110119	109124435	-27.8581	81.1731	75.9808	87.5936	59.7355
Chr2:110582197-110603679	2	110582197	110603679	-14.0985	17.2564	17.7016	16.8561	2.75758
Chr2:111292638-111320306	2	111292638	111320306	-7.62618	23.703	12.8694	7.62618	0
Chr2:113304965-113320713	2	113304965	113320713	-25.4384	43.242	32.9636	33.8759	8.43749
Chr2:114201166-114214387	2	114201166	114214387	-9.44522	8.76168	6.36019	10.6148	1.16959
Chr2:115123953-115139240	2	115123953	115139240	-6.18852	16.6617	13.1155	6.18852	0
Chr2:115533641-115545576	2	115533641	115545576	-25.7474	84.2718	72.5521	83.672	57.9246
Chr2:115733385-115747731	2	115733385	115747731	-19.4143	92.1691	82.6558	93.609	74.1948
Chr2:116614058-116633536	2	116614058	116633536	-14.2516	19.3683	17.8513	14.2516	0
Chr2:117155688-117174543	2	117155688	117174543	-32.5991	70.6672	65.8342	79.5287	46.9296
Chr2:117474388-117488034	2	117474388	117488034	-9.46678	18.382	17.8297	9.71188	0.245098
Chr2:118147810-118159589	2	118147810	118159589	-9.05568	26.2659	28.9496	11.858	2.8023
Chr2:119749786-119757746	2	119749786	119757746	-14.9396	27.3569	24.1396	17.2958	2.35621
Chr2:121299620-121303458	2	121299620	121303458	-12.6206	25.0298	17.7483	16.8364	4.21579
Chr2:121303497-121308055	2	121303497	121308055	-20.1148	37.2626	21.1451	26.8486	6.73373
Chr2:121755666-121762882	2	121755666	121762882	-8.49174	18.7915	13.0153	9.237	0.745257
Chr2:121817305-121829268	2	121817305	121829268	-8.34126	17.8682	19.9356	9.73015	1.38889
Chr2:121891748-121909615	2	121891748	121909615	-28.6498	80.1282	72.4273	79.7699	51.1201
Chr2:122141409-122148895	2	122141409	122148895	-16.8123	16.7456	21.0819	24.6492	7.83694
Chr2:122630794-122631779	2	122630794	122631779	-13.4323	9.89014	9.25388	18.2548	4.8225
Chr2:122665174-122674867	2	122665174	122674867	-4.69953	20.6202	15.0979	4.69953	0
Chr2:124624814-124634864	2	124624814	124634864	-33.3002	55.9361	51.2916	56.2908	22.9906
Chr2:124687001-124705966	2	124687001	124705966	-10.4816	24.2687	13.2125	12.1984	1.71677
Chr2:126100723-126118492	2	126100723	126118492	-12.0062	38.5043	20.6905	16.0217	4.01559
Chr2:128152995-128158252	2	128152995	128158252	-24.8173	81.8932	69.5256	81.8609	57.0436
Chr2:128360068-128369808	2	128360068	128369808	-4.17537	16.2898	13.6465	4.17537	0
Chr2:128698964-128706317	2	128698964	128706317	-36.8705	44.8288	19.1991	51.5238	14.6533
Chr2:129181880-129193678	2	129181880	129193678	-12.2244	23.724	20.5726	13.0718	0.847458
Chr2:130297070-130305292	2	130297070	130305292	-27.3472	71.57	51.1933	56.6592	29.312
Chr2:130312084-130323603	2	130312084	130323603	-31.9375	71.3694	59.3687	64.1501	32.2126
Chr2:130422367-130424548	2	130422367	130424548	-9.50852	10.1048	7.51798	11.6027	2.09415
Chr2:130636476-130642462	2	130636476	130642462	-26.9432	75.0821	73.8499	75.1683	48.2251
Chr2:131171040-131174851	2	131171040	131174851	-5.0793	11.6093	4.11033	6.25805	1.17874
Chr2:131175028-131179610	2	131175028	131179610	-9.32497	6.35789	5.60824	11.1081	1.78313
Chr2:131875830-131887683	2	131875830	131887683	-5.37424	25.8939	18.9297	5.37424	0
Chr2:132731219-132743278	2	132731219	132743278	-34.8318	82.4505	62.9042	79.8987	45.0669
Chr2:136791295-136808229	2	136791295	136808229	-10.0053	28.2754	17.0236	13.0802	3.07487
Chr2:137432881-137453706	2	137432881	137453706	-38.3403	59.1634	43.445	56.2796	17.9392
Chr2:137760014-137779444	2	137760014	137779444	-11.7618	16.1955	11.9103	12.238	0.47619
Chr2:139382503-139401741	2	139382503	139401741	-8.23805	25.2389	27.0773	8.23805	0
Chr2:139931443-139945670	2	139931443	139945670	-32.0273	74.5905	53.1799	61.9028	29.8755
Chr2:140679490-140692997	2	140679490	140692997	-25.909	60.2308	37.9244	43.1942	17.2852
Chr2:140779226-140798660	2	140779226	140798660	-36.9492	70.4293	62.0867	63.4874	26.5382
Chr2:140977054-140996748	2	140977054	140996748	-37.4552	66.0125	52.399	53.6816	16.2264
Chr2:141029894-141046472	2	141029894	141046472	-33.8132	55.7	37.6521	43.4677	9.65447
Chr2:142634709-142649013	2	142634709	142649013	-19.436	92.7578	90.2761	92.5194	73.0834
Chr2:143055097-143063672	2	143055097	143063672	-4.15422	3.87339	4.82008	4.15422	0
Chr2:144466292-144477565	2	144466292	144477565	-26.9818	89.4863	78.7711	83.547	56.5652
Chr2:144488366-144497838	2	144488366	144497838	-26.6239	85.6279	73.2761	78.3183	51.6944
Chr2:145979085-145990016	2	145979085	145990016	-35.0379	80.6743	72.6262	55.9891	20.9512
Chr2:146014740-146027575	2	146014740	146027575	-32.905	78.3903	79.8161	81.529	48.624
Chr2:146045593-146053341	2	146045593	146053341	-23.6316	58.5797	40.3952	31.8385	8.20687
Chr2:151632182-151638717	2	151632182	151638717	-9.13127	7.83638	6.73248	11.1863	2.05499
Chr2:152553728-152562173	2	152553728	152562173	-4.97495	15.5688	15.2514	5.22748	0.252525
Chr2:152643759-152653343	2	152643759	152653343	-4.91096	14.6208	9.2864	5.59123	0.680272
Chr2:152908762-152914613	2	152908762	152914613	-18.5059	19.4864	15.1413	19.5812	1.07527
Chr2:152920195-152926398	2	152920195	152926398	-21.601	37.3325	18.2834	33.5717	11.9707
Chr2:153142659-153153024	2	153142659	153153024	-29.4152	77.1231	74.0347	70.8899	41.4747
Chr2:153497175-153506537	2	153497175	153506537	-42.2423	80.0774	74.9612	71.1659	28.9236
Chr2:153513935-153522144	2	153513935	153522144	-30.6934	63.8907	54.7798	49.4438	18.7504
Chr2:154240874-154253308	2	154240874	154253308	-30.8145	73.6487	66.2789	68.087	37.2725
Chr2:154253368-154268538	2	154253368	154268538	-22.4311	86.4953	85.6981	87.4275	64.9964
Chr2:154314165-154328881	2	154314165	154328881	-27.04	83.6663	79.6616	83.0443	56.0044
Chr2:154376992-154384187	2	154376992	154384187	-42.8197	68.2964	56.264	62.1286	19.3089
Chr2:154733975-154741260	2	154733975	154741260	-24.7035	35.6914	22.2606	32.5626	7.85904
Chr2:155485542-155497128	2	155485542	155497128	-12.5387	21.8914	20.3375	15.6801	3.14139
Chr2:155505039-155512464	2	155505039	155512464	-3.00286	19.7532	14.1629	3.00286	0
Chr2:155538792-155556438	2	155538792	155556438	-34.426	83.0658	38.7499	72.987	38.561
Chr2:156829800-156834271	2	156829800	156834271	-33.8237	93.1361	85.5447	86.1338	52.3101
Chr2:156834278-156839594	2	156834278	156839594	-46.1459	64.9939	61.2274	75.3161	29.1702
Chr2:157958399-157968114	2	157958399	157968114	-11.5556	24.8634	20.9775	12.5973	1.04167
Chr2:158648522-158656376	2	158648522	158656376	-25.4285	37.4051	25.7309	31.9173	6.48878
Chr2:158656553-158666774	2	158656553	158666774	-19.8791	30.9892	17.3598	26.3594	6.48033
Chr2:158668397-158675296	2	158668397	158675296	-14.3355	18.9837	8.68546	16.5963	2.2608
Chr2:158675320-158682507	2	158675320	158682507	-21.1976	48.8613	25.7847	22.5579	1.36028
Chr2:158770190-158776244	2	158770190	158776244	-47.5834	74.4034	33.7845	73.1518	25.5684
Chr2:158776246-158783146	2	158776246	158783146	-31.339	80.6605	53.5247	71.1196	39.7806
Chr2:158783195-158789964	2	158783195	158789964	-23.9997	86.5256	75.4935	86.8572	62.8575
Chr2:159300656-159323688	2	159300656	159323688	-9.80018	19.8164	21.4613	12.4642	2.66407
Chr2:159500060-159513853	2	159500060	159513853	-11.278	31.5382	13.805	11.278	0
Chr2:160891046-160896197	2	160891046	160896197	-18.9818	89.8559	76.5357	93.237	74.2552
Chr2:160896469-160905043	2	160896469	160905043	-40.9842	91.6724	68.9001	90.9096	49.9253
Chr2:160905063-160908930	2	160905063	160908930	-32.7934	46.862	19.2382	39.1804	6.38703
Chr2:161990996-162003705	2	161990996	162003705	-16.7581	82.5036	90.2927	91.869	75.1108
Chr2:162927418-162931559	2	162927418	162931559	-2.09253	3.36055	3.18118	2.09253	0
Chr2:163206472-163215239	2	163206472	163215239	-51.548	67.084	30.9492	63.0501	11.5022
Chr2:163215262-163221555	2	163215262	163221555	-51.8835	74.5257	26.5835	60.7059	8.82235
Chr2:163221568-163228603	2	163221568	163228603	-34.4258	49.104	22.8638	40.4437	6.01795
Chr2:163228890-163234619	2	163228890	163234619	-58.6968	74.7496	26.3475	70.3635	11.6667
Chr2:163234620-163242561	2	163234620	163242561	-50.2405	72.0397	29.9592	64.0996	13.8591
Chr2:163242571-163250951	2	163242571	163250951	-50.8867	87.8387	49.2833	86.6692	35.7824
Chr2:163250995-163256736	2	163250995	163256736	-32.5564	58.8959	24.4027	39.7715	7.21514
Chr2:163256754-163265498	2	163256754	163265498	-61.6994	92.582	54.3662	88.4549	26.7555
Chr2:163265505-163273368	2	163265505	163273368	-55.4385	84.6809	48.8519	86.3076	30.8691
Chr2:163273491-163279179	2	163273491	163279179	-41.7658	54.3693	22.1195	45.318	3.5522
Chr2:163279180-163285570	2	163279180	163285570	-62.8816	69.8095	35.6435	74.7803	11.8986
Chr2:163285643-163292012	2	163285643	163292012	-47.5701	54.2323	16.4757	51.9286	4.35849
Chr2:163292187-163300052	2	163292187	163300052	-41.4416	81.0657	28.9906	74.3302	32.8886
Chr2:163300055-163305773	2	163300055	163305773	-44.216	59.1495	18.2498	47.8671	3.65115
Chr2:163305787-163310924	2	163305787	163310924	-54.2159	66.1008	24.4576	62.5121	8.29619
Chr2:163311071-163318602	2	163311071	163318602	-49.6725	66.4956	38.5132	62.7006	13.0282
Chr2:163318961-163324076	2	163318961	163324076	-49.9589	90.8414	50.3381	82.9942	33.0353
Chr2:163675857-163688993	2	163675857	163688993	-26.5698	87.8712	79.245	84.9765	58.4067
Chr2:164802513-164805776	2	164802513	164805776	-6.31678	6.27344	7.36783	6.70438	0.387597
Chr2:164968432-164971001	2	164968432	164971001	-47.4321	54.5064	26.8002	58.403	10.9709
Chr2:165055256-165062088	2	165055256	165062088	-4.93996	19.4072	12.4659	5.15364	0.213675
Chr2:165724172-165731930	2	165724172	165731930	-31.1117	87.5019	75.0223	85.4836	54.3719
Chr2:165732043-165738571	2	165732043	165738571	-30.2832	63.973	66.4464	58.4596	28.1764
Chr2:166502678-166509924	2	166502678	166509924	-37.0174	68.1453	50.8526	46.3727	9.35534
Chr2:166509956-166517725	2	166509956	166517725	-34.2386	67.8142	60.9656	62.9652	28.7266
Chr2:166517726-166523260	2	166517726	166523260	-14.3674	29.7733	23.0593	17.2029	2.83552
Chr2:167084059-167092436	2	167084059	167092436	-38.9808	56.1998	25.5921	54.0392	15.0584
Chr2:167224072-167232249	2	167224072	167232249	-22.3391	85.4421	90.1542	85.1673	62.8282
Chr2:167242061-167251547	2	167242061	167251547	-34.9529	53.1433	51.1081	49.5894	14.6365
Chr2:167260677-167267324	2	167260677	167267324	-33.9916	86.0751	83.8086	80.1481	46.1565
Chr2:167562708-167568330	2	167562708	167568330	-43.8788	62.7779	36.8621	48.2003	4.3215
Chr2:167646748-167652368	2	167646748	167652368	-29.6741	59.4135	46.5813	48.2582	18.5841
Chr2:167652411-167657937	2	167652411	167657937	-38.3072	68.0848	60.2811	63.5484	25.2413
Chr2:168060440-168065742	2	168060440	168065742	-11.5045	23.9383	22.2503	13.568	2.06349
Chr2:168311641-168317091	2	168311641	168317091	-72.9849	82.7446	23.1668	85.3628	12.3779
Chr2:168317137-168324346	2	168317137	168324346	-43.2272	57.4973	23.313	47.7233	4.49612
Chr2:168324399-168332402	2	168324399	168332402	-65.4423	78.3844	16.6761	76.3594	10.9171
Chr2:168524736-168529999	2	168524736	168529999	-27.0059	45.7673	40.3825	50.2593	23.2534
Chr2:168530004-168536829	2	168530004	168536829	-24.0082	89.8337	91.6135	92.2673	68.2592
Chr2:168537052-168543857	2	168537052	168543857	-14.3186	94.4486	94.349	95.3489	81.0302
Chr2:168543959-168549651	2	168543959	168549651	-20.2024	87.8045	88.6334	93.9322	73.7299
Chr2:168549667-168554747	2	168549667	168554747	-20.7415	88.1109	85.1054	95.0155	74.274
Chr2:168554873-168560189	2	168554873	168560189	-19.878	89.276	91.2301	93.687	73.809
Chr2:168560309-168565549	2	168560309	168565549	-16.2112	90.9742	90.0875	94.7239	78.5127
Chr2:168571169-168575183	2	168571169	168575183	-25.6386	93.0637	93.3335	94.688	69.0494
Chr2:168587193-168590809	2	168587193	168590809	-10.8472	10.1284	16.4643	14.7662	3.919
Chr2:168917711-168921859	2	168917711	168921859	-15.3676	25.5475	21.7998	19.6494	4.28182
Chr2:169566061-169571190	2	169566061	169571190	-6.38923	29.2737	19.5314	6.96394	0.574713
Chr2:169969475-169976911	2	169969475	169976911	-19.9161	45.6233	17.7578	21.9734	2.05738
Chr2:169976936-169986975	2	169976936	169986975	-42.4651	63.4365	31.599	51.092	8.62688
Chr2:169987058-169992891	2	169987058	169992891	-36.2755	59.2861	21.2228	40.392	4.11658
Chr2:169992893-169998107	2	169992893	169998107	-32.5	34.4554	15.1413	33.7471	1.24709
Chr2:169998265-170003684	2	169998265	170003684	-15.6889	36.203	13.1383	17.4798	1.79097
Chr2:170009877-170017116	2	170009877	170017116	-22.6313	55.5502	36.3323	33.9999	11.3686
Chr2:170079154-170089760	2	170079154	170089760	-7.67599	21.5948	22.9032	8.37261	0.696621
Chr2:170215192-170220233	2	170215192	170220233	-8.04942	9.17928	11.7851	8.88275	0.833333
Chr2:170321137-170326685	2	170321137	170326685	-20.3416	33.3369	27.1785	26.9527	6.61105
Chr2:170326689-170332477	2	170326689	170332477	-41.5501	85.6257	70.1508	81.4892	39.9391
Chr2:170967780-170975666	2	170967780	170975666	-7.98356	20.2295	9.87806	8.22166	0.238095
Chr2:172822213-172826276	2	172822213	172826276	-4.85978	9.24112	11.8125	4.85978	0
Chr2:174229327-174239315	2	174229327	174239315	-6.41247	28.3892	11.0151	7.3384	0.925926
Chr2:178076813-178095520	2	178076813	178095520	-9.27176	7.48519	8.72814	9.27176	0
Chr2:178416294-178423490	2	178416294	178423490	-23.0459	78.903	83.3503	76.1183	53.0724
Chr2:178870031-178879846	2	178870031	178879846	-5.24896	17.7681	16.6143	5.24896	0
Chr2:179465658-179475035	2	179465658	179475035	-33.3179	51.0877	54.25	51.2739	17.956
Chr2:179475154-179482721	2	179475154	179482721	-50.5875	58.1606	48.5082	54.3805	3.79296
Chr2:179490096-179500369	2	179490096	179500369	-21.3358	78.1992	73.9308	80.6929	59.357
Chr2:179522159-179529075	2	179522159	179529075	-31.3183	58.842	42.4877	42.7282	11.4099
Chr2:179529106-179537464	2	179529106	179537464	-31.5979	60.9274	51.2614	57.1876	25.5896
Chr2:179537470-179545198	2	179537470	179545198	-34.3876	68.7634	61.9724	77.3077	42.9201
Chr2:179545278-179553813	2	179545278	179553813	-29.7339	94.6028	89.196	93.6501	63.9162
Chr2:179553836-179564042	2	179553836	179564042	-28.756	91.6069	81.0295	87.9088	59.1529
Chr2:179564078-179572083	2	179564078	179572083	-31.9365	60.2458	48.5991	57.2513	25.3148
Chr2:179572102-179579113	2	179572102	179579113	-39.4438	77.8331	59.7908	63.5426	24.0988
Chr2:179579116-179585956	2	179579116	179585956	-49.7761	87.362	73.2545	86.1949	36.4187
Chr2:179585974-179596349	2	179585974	179596349	-41.2514	73.7472	56.2833	75.8274	34.576
Chr2:179605304-179612719	2	179605304	179612719	-38.2961	87.3018	72.2369	75.3033	37.0072
Chr2:179612826-179620968	2	179612826	179620968	-49.0124	67.9719	47.7708	71.1883	22.1759
Chr2:179621294-179630827	2	179621294	179630827	-24.5571	92.4773	88.3816	90.8143	66.2572
Chr2:179630845-179639015	2	179630845	179639015	-39.3156	79.5137	66.0409	76.9039	37.5883
Chr2:179639045-179646208	2	179639045	179646208	-47.2215	81.9173	59.0274	74.3273	27.1058
Chr2:179646220-179652746	2	179646220	179652746	-49.1108	72.4317	38.903	64.133	15.0222
Chr2:179652827-179660631	2	179652827	179660631	-31.3912	83.7153	65.119	74.096	42.7048
Chr2:179660827-179666636	2	179660827	179666636	-39.1625	70.7602	33.1425	57.3743	18.2118
Chr2:179674756-179685614	2	179674756	179685614	-40.0246	77.0998	66.15	69.8835	29.8589
Chr2:179685620-179693458	2	179685620	179693458	-40.9095	64.1774	29.5418	59.6894	18.7799
Chr2:179693463-179701630	2	179693463	179701630	-20.3165	92.4543	85.8367	94.8571	74.5406
Chr2:179701732-179710822	2	179701732	179710822	-43.9492	78.4377	65.3828	74.0279	30.0786
Chr2:179719300-179725866	2	179719300	179725866	-28.7984	62.8544	48.0249	61.6324	32.834
Chr2:179725931-179733447	2	179725931	179733447	-20.1904	37.7585	22.6752	28.0667	7.87629
Chr2:179733489-179743633	2	179733489	179743633	-37.1548	81.4089	75.6988	78.1309	40.976
Chr2:179743834-179754835	2	179743834	179754835	-19.7584	47.0201	41.3914	39.0442	19.2858
Chr2:179754883-179763297	2	179754883	179763297	-32.0518	81.3921	71.9264	76.5492	44.4974
Chr2:179799526-179806320	2	179799526	179806320	-53.839	86.7871	52.9517	77.5898	23.7508
Chr2:179806451-179817727	2	179806451	179817727	-30.6922	87.736	79.3787	90.8937	60.2015
Chr2:179818042-179825722	2	179818042	179825722	-54.2202	86.8117	76.0842	88.8964	34.6761
Chr2:179825778-179831649	2	179825778	179831649	-42.763	86.2064	69.6633	81.9008	39.1378
Chr2:179831666-179838152	2	179831666	179838152	-37.2371	89.7256	82.66	89.2257	51.9886
Chr2:179838267-179848289	2	179838267	179848289	-28.2975	60.7263	36.7317	40.0435	11.746
Chr2:179848401-179854871	2	179848401	179854871	-35.9351	62.5605	65.4406	61.7944	25.8593
Chr2:180093980-180100693	2	180093980	180100693	-4.60933	20.0344	11.1885	5.04793	0.438597
Chr2:180170488-180171839	2	180170488	180171839	-5.63736	5.34943	5.84473	6.51849	0.881136
Chr2:180833511-180842806	2	180833511	180842806	-4.25659	19.8776	14.6795	4.25659	0
Chr2:181171599-181180837	2	181171599	181180837	-32.9762	64.8782	45.0742	48.2904	15.3142
Chr3:8879630-8888224	3	8879630	8888224	-44.2504	80.3796	59.0345	84.7041	40.4537
Chr3:8993284-8999981	3	8993284	8999981	-23.2366	44.7837	32.7832	34.2593	11.0227
Chr3:9000007-9004486	3	9000007	9004486	-5.32811	2.19424	3.55364	5.32811	0
Chr3:9081859-9091479	3	9081859	9091479	-11.3299	23.7304	15.6645	14.9652	3.63536
Chr3:10316277-10323867	3	10316277	10323867	-51.4189	77.0626	32.4608	76.1639	24.745
Chr3:14090060-14109477	3	14090060	14109477	-26.9263	73.6181	61.6044	62.5495	35.6232
Chr3:17643509-17658581	3	17643509	17658581	-17.33	28.1609	26.9558	18.6813	1.35135
Chr3:18104772-18129620	3	18104772	18129620	-33.9922	79.044	67.8641	70.8516	36.8594
Chr3:19273321-19286364	3	19273321	19286364	-33.1794	82.4287	71.9523	74.6725	41.4931
Chr3:22075915-22076852	3	22075915	22076852	-3.76868	2.49436	4.23824	4.2797	0.511019
Chr3:22886875-22902656	3	22886875	22902656	-8.08493	23.4127	23.1865	8.43954	0.35461
Chr3:26904166-26914403	3	26904166	26914403	-13.5526	30.2229	28.2424	15.8867	2.33417
Chr3:29988901-29998568	3	29988901	29998568	-25.0681	42.8643	26.9135	37.3792	12.3111
Chr3:30149598-30160811	3	30149598	30160811	-15.61	30.9092	32.0024	22.2612	6.65113
Chr3:30177131-30190780	3	30177131	30190780	-33.2053	61.2034	44.723	59.9718	26.7665
Chr3:31965911-31978982	3	31965911	31978982	-5.43552	11.3757	13.3375	5.43552	0
Chr3:33846813-33862802	3	33846813	33862802	-19.0335	49.6923	45.7014	25.5588	6.52536
Chr3:33903953-33911805	3	33903953	33911805	-19.6568	44.6647	17.4213	23.7514	4.09465
Chr3:34112343-34121477	3	34112343	34121477	-43.5759	81.2515	54.559	84.2418	40.6659
Chr3:34121588-34135437	3	34121588	34135437	-48.6525	80.3028	58.0815	81.0346	32.3821
Chr3:34135576-34150064	3	34135576	34150064	-31.9759	46.3798	30.5276	47.9802	16.0043
Chr3:34150413-34164480	3	34150413	34164480	-46.5614	72.7381	53.0736	75.3219	28.7605
Chr3:34164513-34177988	3	34164513	34177988	-35.3523	80.5132	65.6959	80.6139	45.2615
Chr3:34178547-34190306	3	34178547	34190306	-35.1587	89.8743	76.7547	90.141	54.9823
Chr3:34190475-34198567	3	34190475	34198567	-45.1333	80.0597	67.5591	95.0091	49.8758
Chr3:34209761-34221421	3	34209761	34221421	-41.9329	72.6454	52.2255	67.9902	26.0573
Chr3:34221471-34232315	3	34221471	34232315	-21.4984	48.2354	27.3628	31.191	9.69262
Chr3:34232370-34242943	3	34232370	34242943	-39.5805	57.6507	24.3597	48.2834	8.70285
Chr3:34243008-34255565	3	34243008	34255565	-39.1624	59.0447	32.8603	48.6796	9.5172
Chr3:34255805-34267803	3	34255805	34267803	-45.2404	82.195	65.4458	87.3701	42.1297
Chr3:34267844-34280248	3	34267844	34280248	-39.9957	79.6309	52.0571	81.4935	41.4978
Chr3:34280638-34293562	3	34280638	34293562	-41.0233	68.3825	45.13	70.4823	29.459
Chr3:34293790-34308127	3	34293790	34308127	-49.6474	67.034	29.2131	65.1062	15.4588
Chr3:34308266-34317631	3	34308266	34317631	-19.6542	27.595	29.85	23.7385	4.08432
Chr3:34318281-34327388	3	34318281	34327388	-23.222	42.7601	19.9323	31.0619	7.83981
Chr3:34327510-34335323	3	34327510	34335323	-17.0751	25.6926	20.3538	19.7867	2.71164
Chr3:34335385-34353717	3	34335385	34353717	-37.1108	53.4856	39.3255	53.8969	16.7861
Chr3:34353722-34364253	3	34353722	34364253	-51.2641	73.1001	41.5633	73.7509	22.4868
Chr3:34364471-34375261	3	34364471	34375261	-46.9797	89.8355	54.4861	78.2498	31.2701
Chr3:34375361-34388547	3	34375361	34388547	-28.8139	74.4324	45.3964	68.8319	40.0181
Chr3:34388570-34398308	3	34388570	34398308	-43.7135	87.6413	49.0032	81.4618	37.7482
Chr3:34398314-34410064	3	34398314	34410064	-40.6179	84.2706	62.3145	75.045	34.4271
Chr3:34434485-34443261	3	34434485	34443261	-40.3936	66.8052	34.879	58.9179	18.5243
Chr3:34443355-34451426	3	34443355	34451426	-43.5712	78.274	50.5197	74.493	30.9217
Chr3:34451501-34458520	3	34451501	34458520	-44.818	85.9071	75.3293	85.9734	41.1554
Chr3:34458641-34469710	3	34458641	34469710	-26.0459	90.6231	79.361	83.2556	57.2097
Chr3:34469731-34482130	3	34469731	34482130	-36.2885	85.2119	83.1594	86.4774	50.1888
Chr3:34482296-34491784	3	34482296	34491784	-38.154	83.8842	75.3486	88.5961	50.4421
Chr3:34577168-34587688	3	34577168	34587688	-18.4715	25.1389	18.6202	20.6502	2.17865
Chr3:34615623-34624819	3	34615623	34624819	-21.8313	27.2514	21.2833	30.1861	8.35485
Chr3:34642743-34648692	3	34642743	34648692	-6.25455	6.88685	5.67961	6.25455	0
Chr3:34654704-34661303	3	34654704	34661303	-17.8861	22.0406	13.8457	18.8828	0.996732
Chr3:35490112-35502712	3	35490112	35502712	-30.1237	55.002	34.563	43.7367	13.613
Chr3:35516119-35531665	3	35516119	35531665	-32.8841	63.7107	45.2255	56.3468	23.4627
Chr3:35531886-35546722	3	35531886	35546722	-32.9909	73.3898	63.755	62.9861	29.9952
Chr3:35951325-35963206	3	35951325	35963206	-40.2499	88.0382	53.2664	78.2566	38.0067
Chr3:35963236-35971716	3	35963236	35971716	-37.5672	89.6067	53.5007	89.203	51.6358
Chr3:35987321-35995858	3	35987321	35995858	-26.8503	93.7095	61.9795	90.8399	63.9896
Chr3:36184691-36195379	3	36184691	36195379	-5.29278	15.6559	27.0068	5.29278	0
Chr3:38379892-38396238	3	38379892	38396238	-7.56725	23.5085	19.0543	7.56725	0
Chr3:40395587-40404148	3	40395587	40404148	-5.24422	11.5846	15.041	5.56473	0.320513
Chr3:40531626-40538805	3	40531626	40538805	-7.5178	13.2687	9.20928	7.96826	0.45045
Chr3:43423838-43451382	3	43423838	43451382	-15.4452	38.9698	28.2476	18.4436	2.99841
Chr3:47100160-47127001	3	47100160	47127001	-17.5196	36.5962	19.5446	20.4043	2.88467
Chr3:48545368-48573959	3	48545368	48573959	-14.8672	36.4977	17.4169	18.0367	3.16952
Chr3:50638408-50655393	3	50638408	50655393	-7.71108	18.998	13.271	8.4203	0.70922
Chr3:50873180-50882535	3	50873180	50882535	-36.1235	38.4399	22.3865	41.6606	5.53716
Chr3:50882571-50892940	3	50882571	50892940	-19.0582	32.4997	20.0491	26.3393	7.28107
Chr3:50991462-51000953	3	50991462	51000953	-9.8219	12.4375	14.6721	11.1224	1.30051
Chr3:51261990-51270044	3	51261990	51270044	-26.0888	90.0124	90.609	97.8643	71.7755
Chr3:51802091-51808870	3	51802091	51808870	-3.23823	14.5942	11.3631	3.23823	0
Chr3:52060104-52069509	3	52060104	52069509	-34.2566	53.4539	25.5117	42.2767	8.02017
Chr3:52077456-52086289	3	52077456	52086289	-26.2718	53.9482	29.3612	32.0609	5.78908
Chr3:52086326-52093974	3	52086326	52093974	-10.9444	24.6627	7.63506	13.1049	2.16049
Chr3:54493174-54508063	3	54493174	54508063	-37.0942	60.3898	38.4218	55.2574	18.1633
Chr3:54902876-54915025	3	54902876	54915025	-9.25033	14.7568	13.0297	10.513	1.26263
Chr3:54960608-54980274	3	54960608	54980274	-5.15913	13.847	16.0974	5.15913	0
Chr3:55418942-55431344	3	55418942	55431344	-5.26595	15.1369	14.1045	5.26595	0
Chr3:55783508-55787963	3	55783508	55787963	-11.2285	10.3925	13.9128	13.7423	2.51374
Chr3:56199441-56210241	3	56199441	56210241	-7.29206	20.7128	22.4896	8.75574	1.46368
Chr3:56869677-56896687	3	56869677	56896687	-16.3236	29.5165	13.0852	18.0805	1.75689
Chr3:56896689-56907846	3	56896689	56907846	-25.6419	24.7138	40.1222	32.0871	6.44517
Chr3:58573131-58577145	3	58573131	58577145	-1.94066	2.69143	4.28234	1.94066	0
Chr3:59397782-59410808	3	59397782	59410808	-17.3485	24.8909	19.1432	20.906	3.5575
Chr3:59410838-59431739	3	59410838	59431739	-19.1328	32.1466	30.3287	23.1954	4.06251
Chr3:60588678-60603126	3	60588678	60603126	-24.6931	83.9282	80.4895	84.9834	60.2902
Chr3:61991031-62014387	3	61991031	62014387	-11.6535	26.5596	16.343	14.3005	2.64706
Chr3:66054763-66063573	3	66054763	66063573	-28.55	87.631	84.8038	91.6599	63.1099
Chr3:67374766-67397895	3	67374766	67397895	-29.701	69.2477	24.528	52.9915	23.2905
Chr3:67582909-67588873	3	67582909	67588873	-16.2298	25.5984	12.927	24.1061	7.87629
Chr3:68268496-68283949	3	68268496	68283949	-4.0041	15.117	7.84774	4.0041	0
Chr3:68718931-68724950	3	68718931	68724950	-6.8022	18.2361	17.1842	8.70877	1.90657
Chr3:68813672-68825389	3	68813672	68825389	-5.17265	13.9506	15.935	5.17265	0
Chr3:69845110-69854676	3	69845110	69854676	-39.0259	56.4719	79.2199	59.1272	20.1013
Chr3:72475911-72498075	3	72475911	72498075	-22.1169	45.0903	32.7994	28.3005	6.18359
Chr3:72783181-72815346	3	72783181	72815346	-22.8829	38.6564	30.0549	31.8985	9.01568
Chr3:73134477-73157238	3	73134477	73157238	-10.3489	19.0985	21.2306	11.3693	1.02041
Chr3:73444856-73460495	3	73444856	73460495	-26.7697	64.4802	54.1419	52.8924	26.1227
Chr3:74228292-74248748	3	74228292	74248748	-25.2748	47.5946	30.0072	31.639	6.36427
Chr3:74881809-74901825	3	74881809	74901825	-33.0237	57.6076	53.4161	45.6341	12.6105
Chr3:75261917-75282433	3	75261917	75282433	-29.3082	60.8371	50.113	57.1754	27.8672
Chr3:77006526-77030527	3	77006526	77030527	-18.6406	32.0019	17.3206	18.6406	0
Chr3:78507468-78525069	3	78507468	78525069	-9.97372	25.3458	17.2801	11.1642	1.19048
Chr3:78993441-79009451	3	78993441	79009451	-4.13202	28.9269	15.0005	4.13202	0
Chr3:79524137-79533844	3	79524137	79533844	-33.9257	73.2724	61.4454	61.2201	27.2943
Chr3:79559882-79567424	3	79559882	79567424	-34.5983	69.044	49.5147	67.3907	32.7924
Chr3:80045343-80061801	3	80045343	80061801	-7.22851	12.8593	11.8262	7.22851	0
Chr3:82487640-82504433	3	82487640	82504433	-21.0175	25.1634	16.8418	22.9048	1.88729
Chr3:82819165-82829596	3	82819165	82829596	-10.0752	25.0883	19.1519	10.7041	0.628931
Chr3:83764499-83766562	3	83764499	83766562	-5.50442	2.71035	2.88238	5.50442	0
Chr3:84060132-84070976	3	84060132	84070976	-31.3005	55.749	43.2352	57.6738	26.3733
Chr3:84155022-84160382	3	84155022	84160382	-3.46149	6.66144	6.12825	3.94458	0.483092
Chr3:87266036-87282093	3	87266036	87282093	-7.8366	21.3232	9.74068	8.776	0.939394
Chr3:87998487-88000323	3	87998487	88000323	-3.88864	2.44705	1.64769	4.02753	0.138889
Chr3:88070309-88078875	3	88070309	88078875	-44.4949	55.733	26.301	58.3317	13.8368
Chr3:89223112-89227117	3	89223112	89227117	-45.4261	88.9431	77.1972	84.9422	39.5162
Chr3:89266163-89270336	3	89266163	89270336	-19.6923	13.1484	11.9625	23.1276	3.4353
Chr3:89270420-89276350	3	89270420	89276350	-30.7312	49.8838	45.4422	55.3414	24.6102
Chr3:89276355-89280233	3	89276355	89280233	-20.1466	24.2593	11.2116	28.9365	8.7899
Chr3:89530872-89540526	3	89530872	89540526	-29.3429	43.5915	29.9211	43.5956	14.2527
Chr3:89540687-89550015	3	89540687	89550015	-16.1277	44.4028	20.4135	23.3059	7.17822
Chr3:89557946-89564822	3	89557946	89564822	-10.0937	24.1561	15.8758	11.9862	1.89249
Chr3:90509024-90513112	3	90509024	90513112	-13.3163	10.0131	7.77861	14.759	1.44267
Chr3:91788913-91811113	3	91788913	91811113	-29.903	68.4689	67.795	66.5473	36.6443
Chr3:94669120-94674635	3	94669120	94674635	-43.0644	74.6313	77.4709	73.0623	29.9979
Chr3:95653366-95658951	3	95653366	95658951	-13.3605	13.0694	16.5387	19.5532	6.19263
Chr3:95935322-95940703	3	95935322	95940703	-21.0572	93.4863	84.5126	93.1228	72.0656
Chr3:97610202-97617603	3	97610202	97617603	-5.9185	7.2318	11.7002	6.45613	0.537634
Chr3:98031754-98040237	3	98031754	98040237	-45.9552	86.2829	69.4031	78.7913	32.8361
Chr3:98040274-98047626	3	98040274	98047626	-41.4624	85.739	76.1672	89.3047	47.8423
Chr3:98047671-98055059	3	98047671	98055059	-27.2811	91.5723	84.8105	92.1715	64.8903
Chr3:98071109-98080324	3	98071109	98080324	-20.6389	85.6499	86.0479	93.7494	73.1105
Chr3:98089586-98097312	3	98089586	98097312	-24.682	87.1067	81.1634	85.2835	60.6015
Chr3:100978080-100985814	3	100978080	100985814	-29.1437	82.3969	78.2664	84.2733	55.1296
Chr3:101811302-101818712	3	101811302	101818712	-52.8942	71.4113	39.1798	62.2147	9.32045
Chr3:101818727-101826910	3	101818727	101826910	-63.2212	82.5679	35.6359	77.3898	14.1686
Chr3:101826920-101835508	3	101826920	101835508	-65.6163	83.1559	36.6577	75.1632	9.54683
Chr3:102963430-102975137	3	102963430	102975137	-5.18413	21.5975	18.6819	5.18413	0
Chr3:103422131-103427531	3	103422131	103427531	-2.32367	15.7227	22.3429	2.32367	0
Chr3:103562079-103571984	3	103562079	103571984	-7.26859	10.7244	13.5909	8.31161	1.04302
Chr3:103791343-103803329	3	103791343	103803329	-18.0124	17.7513	10.5858	23.4849	5.47255
Chr3:104353239-104364260	3	104353239	104364260	-12.2206	27.9586	14.0119	13.4678	1.24722
Chr3:104961395-104962419	3	104961395	104962419	-24.4603	33.7912	3.60389	28.6713	4.21103
Chr3:104962425-104968070	3	104962425	104968070	-35.8307	41.2154	19.8151	47.4322	11.6015
Chr3:105704179-105708659	3	105704179	105708659	-44.5116	43.7493	47.2039	51.4987	6.98718
Chr3:106029962-106047303	3	106029962	106047303	-22.9978	37.4313	18.8764	25.5745	2.57663
Chr3:106599998-106618488	3	106599998	106618488	-14.6894	23.9456	22.154	18.8526	4.16322
Chr3:107425178-107435888	3	107425178	107435888	-5.85974	8.88952	15.8726	6.07904	0.219298
Chr3:107546735-107554710	3	107546735	107554710	-41.1339	59.573	44.8993	49.9762	8.84229
Chr3:107554728-107565108	3	107554728	107565108	-13.6094	33.3934	20.242	19.5054	5.89603
Chr3:108863884-108875023	3	108863884	108875023	-20.6779	40.648	22.8753	29.9306	9.2526
Chr3:109042348-109052330	3	109042348	109052330	-4.20218	15.9072	18.0961	4.20218	0
Chr3:110727747-110752571	3	110727747	110752571	-11.2009	24.9612	32.9813	12.4467	1.24579
Chr3:111640426-111674168	3	111640426	111674168	-15.029	34.2752	24.5636	17.1458	2.11676
Chr3:112780145-112810285	3	112780145	112810285	-17.5648	33.9815	26.5257	20.2156	2.65079
Chr3:113814544-113834637	3	113814544	113834637	-9.63431	13.1245	25.312	11.0746	1.44033
Chr3:116324636-116329235	3	116324636	116329235	-33.1421	77.0238	63.306	62.0695	28.9274
Chr3:116419845-116423728	3	116419845	116423728	-36.0944	66.8164	44.7701	62.9687	26.8743
Chr3:116423737-116427776	3	116423737	116427776	-28.3654	52.1081	26.8787	31.834	3.46852
Chr3:116526951-116535352	3	116526951	116535352	-34.9854	60.728	31.9006	52.4389	17.4536
Chr3:119173354-119189717	3	119173354	119189717	-7.57827	14.2361	8.77018	7.57827	0
Chr3:119337132-119354870	3	119337132	119354870	-13.012	21.3923	18.5394	15.1486	2.13663
Chr3:121300144-121309185	3	121300144	121309185	-34.0571	77.1947	64.447	77.096	43.0388
Chr3:121343382-121349798	3	121343382	121349798	-30.6176	84.9465	60.7977	68.99	38.3724
Chr3:121496735-121504523	3	121496735	121504523	-25.1362	35.7576	18.2651	28.0348	2.89855
Chr3:121504750-121512551	3	121504750	121512551	-50.7079	69.5281	58.12	69.9943	19.2863
Chr3:121651690-121661046	3	121651690	121661046	-8.03152	20.7831	10.9053	8.87344	0.841919
Chr3:123607985-123620214	3	123607985	123620214	-7.60428	21.6072	23.4236	7.60428	0
Chr3:126223453-126246455	3	126223453	126246455	-23.2258	43.1548	33.916	37.6011	14.3753
Chr3:126301270-126331923	3	126301270	126331923	-16.4765	35.7359	16.4961	19.2783	2.80177
Chr3:127283787-127294202	3	127283787	127294202	-6.71017	18.2874	14.7336	7.41939	0.70922
Chr3:128029015-128039526	3	128029015	128039526	-6.15347	8.80276	9.14965	6.15347	0
Chr3:128051666-128067584	3	128051666	128067584	-10.928	19.6001	18.2177	12.945	2.01703
Chr3:128183088-128194865	3	128183088	128194865	-6.17098	11.0372	14.3917	6.17098	0
Chr3:128812922-128833277	3	128812922	128833277	-11.0264	23.925	22.9003	11.784	0.757576
Chr3:129074976-129089683	3	129074976	129089683	-6.22235	17.9487	12.5099	6.22235	0
Chr3:129624403-129632955	3	129624403	129632955	-3.79298	30.9986	22.3831	3.79298	0
Chr3:131481354-131487716	3	131481354	131487716	-8.88109	12.4	17.6646	9.21442	0.333333
Chr3:132149647-132168274	3	132149647	132168274	-6.01083	21.0175	23.5011	6.01083	0
Chr3:133310136-133311890	3	133310136	133311890	-7.48735	2.31277	1.54398	8.03537	0.548014
Chr3:133311925-133318965	3	133311925	133318965	-33.5999	63.9326	46.6858	59.4395	25.8396
Chr3:133358944-133366981	3	133358944	133366981	-40.393	70.9018	58.4327	69.457	29.064
Chr3:133605067-133617179	3	133605067	133617179	-51.1879	79.304	46.1009	74.8061	23.6182
Chr3:134762413-134782511	3	134762413	134782511	-15.532	32.1527	24.3468	16.5267	0.994745
Chr3:134940854-134961997	3	134940854	134961997	-10.3859	30.696	21.6697	11.4729	1.08696
Chr3:135403444-135411255	3	135403444	135411255	-32.9387	53.8372	58.5046	61.6787	28.7399
Chr3:135469785-135481048	3	135469785	135481048	-5.88976	22.4729	24.5708	5.88976	0
Chr3:135627661-135635663	3	135627661	135635663	-33.7311	93.0425	64.258	75.0999	41.3687
Chr3:135657896-135666371	3	135657896	135666371	-24.3469	92.7557	80.6716	93.1777	68.8308
Chr3:135686096-135691150	3	135686096	135691150	-18.7305	29.1455	13.6484	27.0444	8.31385
Chr3:135906681-135920371	3	135906681	135920371	-29.7152	56.6509	46.1726	48.3707	18.6555
Chr3:135920398-135933505	3	135920398	135933505	-24.5368	27.0631	28.525	25.8526	1.31579
Chr3:136681708-136689490	3	136681708	136689490	-29.0753	47.6795	21.0688	37.5584	8.48312
Chr3:136689596-136700906	3	136689596	136700906	-34.0978	55.0563	33.6382	52.504	18.4062
Chr3:136712614-136724388	3	136712614	136724388	-25.9068	56.7838	20.8463	35.844	9.93721
Chr3:136754760-136763564	3	136754760	136763564	-13.027	21.8641	9.1344	13.8868	0.859788
Chr3:136763588-136776039	3	136763588	136776039	-20.1744	23.4521	16.5872	26.3797	6.20527
Chr3:136776156-136786051	3	136776156	136786051	-30.9165	53.8411	18.615	34.7159	3.79939
Chr3:136836210-136848118	3	136836210	136848118	-40.2566	63.9018	28.4425	67.6272	27.3706
Chr3:136848259-136862261	3	136848259	136862261	-31.4974	47.5589	29.3152	58.1064	26.609
Chr3:136862368-136874840	3	136862368	136874840	-41.5821	72.5401	34.6423	63.8711	22.2889
Chr3:136875091-136887605	3	136875091	136887605	-41.0469	92.4205	72.7678	91.0139	49.967
Chr3:136887713-136896289	3	136887713	136896289	-54.7465	92.0802	48.7594	83.9339	29.1874
Chr3:136912735-136922655	3	136912735	136922655	-34.3297	92.1009	61.6653	93.2324	58.9027
Chr3:136922803-136932503	3	136922803	136932503	-39.1481	93.9021	65.8459	78.5105	39.3625
Chr3:137160049-137181114	3	137160049	137181114	-10.6638	28.702	15.9555	11.373	0.70922
Chr3:137181257-137203571	3	137181257	137203571	-13.4099	31.9595	13.0168	14.8706	1.46076
Chr3:137293375-137311972	3	137293375	137311972	-18.0705	29.7282	18.5636	23.0585	4.98803
Chr3:137312096-137323154	3	137312096	137323154	-5.94006	15.5105	30.269	5.94006	0
Chr3:138065104-138067899	3	138065104	138067899	-1.84113	20.0039	16.2343	1.93296	0.0918274
Chr3:138436267-138443091	3	138436267	138443091	-14.4256	22.4169	13.8915	22.1602	7.73459
Chr3:140384915-140413699	3	140384915	140413699	-22.4255	29.1138	19.2513	25.7498	3.32428
Chr3:142276284-142287174	3	142276284	142287174	-36.2894	52.4317	31.2594	50.3458	14.0564
Chr3:142592471-142618186	3	142592471	142618186	-19.8986	33.1103	19.4657	25.691	5.79242
Chr3:146404562-146405841	3	146404562	146405841	-8.60571	5.65919	7.54515	8.70988	0.104167
Chr3:146813896-146825329	3	146813896	146825329	-7.81752	16.765	11.5345	7.81752	0
Chr3:147012132-147025483	3	147012132	147025483	-8.00961	22.8024	15.5264	8.60484	0.595238
Chr3:147288015-147296711	3	147288015	147296711	-5.30008	24.7499	15.0841	5.50972	0.209644
Chr3:147433192-147447469	3	147433192	147447469	-5.9672	20.2694	10.907	5.9672	0
Chr3:150195015-150220537	3	150195015	150220537	-11.3483	20.1158	13.2354	11.3483	0
Chr3:151544629-151557690	3	151544629	151557690	-25.5587	50.9436	45.1794	45.5485	19.9898
Chr3:152276387-152284936	3	152276387	152284936	-29.5452	64.4496	53.2241	50.3908	20.8457
Chr3:152340786-152346533	3	152340786	152346533	-6.16938	12.4298	9.84224	6.40748	0.238095
Chr3:152640584-152653526	3	152640584	152653526	-4.13853	21.4321	12.7188	4.13853	0
Chr3:152694728-152702657	3	152694728	152702657	-5.78606	10.3571	16.7405	5.78606	0
Chr3:153605150-153611663	3	153605150	153611663	-7.03456	9.94157	12.3012	7.4177	0.383142
Chr3:155336027-155361103	3	155336027	155361103	-15.3563	22.0148	23.5159	19.6476	4.29128
Chr3:155465212-155488327	3	155465212	155488327	-16.8215	28.3514	20.9286	18.6133	1.79172
Chr3:155572848-155596667	3	155572848	155596667	-14.4971	21.083	19.4658	17.7877	3.2906
Chr3:155780108-155805508	3	155780108	155805508	-31.2505	52.5399	27.967	40.4266	9.17608
Chr3:155850219-155874751	3	155850219	155874751	-14.8335	26.7667	20.4724	16.0681	1.23457
Chr3:155899282-155919963	3	155899282	155919963	-16.4526	30.6936	27.6326	19.7	3.24743
Chr3:156131681-156149793	3	156131681	156149793	-11.767	24.5987	22.7324	11.767	0
Chr3:159571251-159600870	3	159571251	159600870	-13.2004	43.4425	19.2526	13.8414	0.641026
Chr3:159644029-159660295	3	159644029	159660295	-12.2322	44.6047	32.2055	13.6607	1.42857
Chr4:3835176-3836809	4	3835176	3836809	-21.6478	26.1967	22.1025	29.5518	7.90398
Chr4:4704935-4723182	4	4704935	4723182	-4.49469	20.107	15.3524	4.49469	0
Chr4:8647431-8651201	4	8647431	8651201	-7.94775	0.920104	1.45922	7.94775	0
Chr4:12034512-12048560	4	12034512	12048560	-29.9456	54.2636	33.7705	40.0266	10.081
Chr4:12070363-12085634	4	12070363	12085634	-26.4443	63.6094	40.7329	40.3065	13.8621
Chr4:14826375-14837524	4	14826375	14837524	-6.9175	7.99874	6.26563	7.9276	1.0101
Chr4:16168409-16189754	4	16168409	16189754	-34.1688	86.4245	72.3515	83.39	49.2212
Chr4:16333994-16355758	4	16333994	16355758	-22.1456	42.9972	34.2675	33.7879	11.6423
Chr4:18187955-18214063	4	18187955	18214063	-20.3561	37.6645	25.9001	27.8958	7.53968
Chr4:22400979-22413524	4	22400979	22413524	-23.9273	90.4998	79.6207	91.6949	67.7677
Chr4:22443135-22457010	4	22443135	22457010	-8.34308	24.1383	14.2243	9.17641	0.833333
Chr4:26349594-26369641	4	26349594	26369641	-13.3914	28.1912	19.6688	15.9515	2.56007
Chr4:26892055-26916982	4	26892055	26916982	-14.8122	35.775	14.5988	18.5187	3.70653
Chr4:28054110-28080810	4	28054110	28080810	-22.3548	34.0501	33.4661	29.6216	7.26678
Chr4:29296258-29316702	4	29296258	29316702	-10.9768	31.7629	19.9523	12.0521	1.07527
Chr4:33265267-33277053	4	33265267	33277053	-8.98121	18.8406	13.7833	9.48626	0.50505
Chr4:33866910-33887484	4	33866910	33887484	-8.37817	22.0767	15.0024	9.04484	0.666667
Chr4:35384161-35392826	4	35384161	35392826	-34.1906	66.482	67.4031	64.1894	29.9988
Chr4:35392831-35399315	4	35392831	35399315	-42.2079	87.1191	78.7181	82.8335	40.6256
Chr4:35457812-35477731	4	35457812	35477731	-33.2247	64.7721	60.7034	64.9829	31.7582
Chr4:35477977-35497204	4	35477977	35497204	-32.9349	61.1111	41.1233	52.494	19.5591
Chr4:35497261-35518187	4	35497261	35518187	-38.1012	81.8285	70.9158	78.6152	40.514
Chr4:35547062-35564450	4	35547062	35564450	-32.3483	67.5203	48.7526	53.1488	20.8004
Chr4:35566252-35579353	4	35566252	35579353	-25.6972	60.8871	32.3169	34.0535	8.3563
Chr4:37054584-37081056	4	37054584	37081056	-12.8404	28	23.0507	13.3166	0.47619
Chr4:37669275-37698604	4	37669275	37698604	-18.2851	46.8138	30.9698	22.8976	4.61244
Chr4:38338795-38366964	4	38338795	38366964	-42.1666	60.796	49.672	61.8589	19.6923
Chr4:39076527-39110961	4	39076527	39110961	-22.2466	29.1281	23.1674	27.4027	5.15612
Chr4:40209213-40216533	4	40209213	40216533	-22.7084	46.4885	35.4542	31.5628	8.85433
Chr4:40846750-40853728	4	40846750	40853728	-7.32382	4.50458	3.0461	7.65451	0.330688
Chr4:41497575-41498706	4	41497575	41498706	-2.52842	3.74116	2.94621	2.59875	0.0703235
Chr4:41785229-41795593	4	41785229	41795593	-18.1802	87.8346	84.4703	96.0677	77.8875
Chr4:43404087-43409671	4	43404087	43409671	-41.0691	75.5842	65.7889	71.8854	30.8163
Chr4:43431770-43441427	4	43431770	43441427	-39.0935	62.0283	56.8314	66.6469	27.5534
Chr4:43661044-43668678	4	43661044	43668678	-33.2088	54.9303	21.6157	55.1342	21.9255
Chr4:43836681-43849362	4	43836681	43849362	-7.77468	16.6349	13.9347	9.51536	1.74068
Chr4:45065397-45074300	4	45065397	45074300	-37.5523	87.0015	69.5869	89.5713	52.019
Chr4:45074354-45082814	4	45074354	45082814	-26.4658	90.4782	82.7886	89.6802	63.2144
Chr4:45320217-45323454	4	45320217	45323454	-3.60871	3.91472	3.99971	3.60871	0
Chr4:46439355-46448921	4	46439355	46448921	-5.0446	11.5218	19.1992	5.59105	0.546448
Chr4:47092187-47098881	4	47092187	47098881	-20.7235	25.6036	17.8654	30.1878	9.46433
Chr4:47103517-47110526	4	47103517	47110526	-21.173	92.2663	86.112	89.1242	67.9511
Chr4:47110556-47116411	4	47110556	47116411	-41.4932	89.2588	72.6605	88.0065	46.5133
Chr4:47116554-47123777	4	47116554	47123777	-21.6936	91.239	82.084	91.3846	69.691
Chr4:48541808-48549598	4	48541808	48549598	-30.8948	41.4783	23.8259	43.0189	12.1241
Chr4:48549661-48556597	4	48549661	48556597	-23.062	44.9187	19.5312	26.6171	3.55509
Chr4:49169156-49188160	4	49169156	49188160	-11.8525	28.9961	17.9079	12.408	0.555555
Chr4:49188795-49207572	4	49188795	49207572	-5.87159	19.0456	12.577	5.87159	0
Chr4:49290132-49308141	4	49290132	49308141	-13.0507	28.2578	16.1761	15.9089	2.85814
Chr4:49401418-49414964	4	49401418	49414964	-7.2339	21.4403	23.3093	7.97464	0.740741
Chr4:49593884-49597610	4	49593884	49597610	-1.55508	1.10158	2.35203	1.55508	0
Chr4:49631244-49633872	4	49631244	49633872	-10.7826	17.4136	12.968	19.3604	8.57785
Chr4:50291682-50316495	4	50291682	50316495	-12.1616	35.0882	24.1956	15.5959	3.43434
Chr4:51119033-51149526	4	51119033	51149526	-21.2388	37.2571	21.2031	27.0036	5.76478
Chr4:55882669-55895300	4	55882669	55895300	-12.1591	22.7145	17.5425	12.7544	0.595238
Chr4:56711256-56722129	4	56711256	56722129	-6.06439	17.4409	11.331	6.06439	0
Chr4:56722152-56730268	4	56722152	56730268	-12.8965	31.6496	31.2809	18.3129	5.41636
Chr4:57010009-57018378	4	57010009	57018378	-19.4861	34.0027	21.5104	24.9011	5.41498
Chr4:57189806-57196230	4	57189806	57196230	-22.4173	51.339	18.6037	29.9753	7.55801
Chr4:57196333-57202401	4	57196333	57202401	-36.4846	60.5254	25.0076	50.4471	13.9626
Chr4:57210114-57218533	4	57210114	57218533	-47.3094	78.2925	33.5555	72.4001	25.0907
Chr4:57226376-57232450	4	57226376	57232450	-45.8645	62.4194	28.1493	63.0745	17.21
Chr4:57232460-57240529	4	57232460	57240529	-37.9873	71.3692	35.9043	73.4321	35.4447
Chr4:57240602-57246767	4	57240602	57246767	-34.0635	79.4091	40.3133	66.3296	32.2661
Chr4:57246960-57252894	4	57246960	57252894	-20.677	33.4272	21.5632	23.1543	2.47723
Chr4:57252907-57258852	4	57252907	57258852	-26.4366	50.0074	10.2802	38.5628	12.1262
Chr4:57258918-57266522	4	57258918	57266522	-45.9755	63.997	27.0941	63.0541	17.0786
Chr4:57266555-57271989	4	57266555	57271989	-19.5779	34.0927	10.2066	26.2049	6.62698
Chr4:57783298-57792538	4	57783298	57792538	-22.7668	38.6197	14.58	27.7811	5.01426
Chr4:57792588-57802480	4	57792588	57802480	-49.4009	50.4274	18.9928	53.029	3.62801
Chr4:57802509-57814387	4	57802509	57814387	-28.3821	37.5275	18.242	33.1516	4.76957
Chr4:57814605-57822325	4	57814605	57822325	-33.4468	56.606	28.7733	47.149	13.7022
Chr4:57822388-57831917	4	57822388	57831917	-28.0769	47.7184	19.0501	32.5512	4.47435
Chr4:57831979-57840926	4	57831979	57840926	-25.5749	29.8405	18.4546	35.9756	10.4006
Chr4:57840927-57849616	4	57840927	57849616	-28.0684	41.3293	19.5046	36.0326	7.96418
Chr4:57849709-57856118	4	57849709	57856118	-23.8045	31.3414	19.3825	30.5469	6.74238
Chr4:57990665-58005791	4	57990665	58005791	-7.16897	12.1987	11.711	7.16897	0
Chr4:59035336-59040459	4	59035336	59040459	-27.6779	29.9443	18.2864	33.1726	5.49474
Chr4:59040582-59052914	4	59040582	59052914	-50.2975	69.8457	24.8599	64.8678	14.5703
Chr4:59361378-59368415	4	59361378	59368415	-2.20506	24.0052	19.9093	2.20506	0
Chr4:59800361-59806075	4	59800361	59806075	-21.6793	36.2041	43.3448	37.0392	15.3599
Chr4:64067674-64093317	4	64067674	64093317	-11.5242	18.0667	16.2711	12.6112	1.08696
Chr4:64257336-64281043	4	64257336	64281043	-13.1699	20.441	7.66599	14.4199	1.25
Chr4:67031539-67052668	4	67031539	67052668	-10.489	31.5003	15.6676	10.489	0
Chr4:67196064-67222380	4	67196064	67222380	-18.9015	34.4586	22.3579	21.2337	2.33211
Chr4:67427214-67456381	4	67427214	67456381	-18.1317	30.421	22.7323	20.4629	2.33115
Chr4:67607693-67634485	4	67607693	67634485	-19.8052	36.1905	14.4799	22.6036	2.79839
Chr4:68234342-68261404	4	68234342	68261404	-17.9623	35.5127	22.4138	20.1128	2.15054
Chr4:68853375-68877060	4	68853375	68877060	-14.8162	22.6892	19.9447	16.1934	1.37722
Chr4:68877228-68901346	4	68877228	68901346	-22.0438	29.2969	13.091	26.5753	4.53149
Chr4:68920929-68944637	4	68920929	68944637	-12.2831	26.2842	19.228	15.4568	3.17375
Chr4:69020425-69040835	4	69020425	69040835	-8.65414	30.5345	17.8436	8.65414	0
Chr4:69216575-69234422	4	69216575	69234422	-16.4011	41.0098	39.1713	20.8984	4.49732
Chr4:69803508-69819214	4	69803508	69819214	-15.7693	28.4261	20.2723	21.1003	5.33107
Chr4:69836518-69851265	4	69836518	69851265	-8.30722	20.245	11.5919	8.30722	0
Chr4:69866707-69880973	4	69866707	69880973	-7.44635	26.0417	19.4194	7.44635	0
Chr4:72212152-72237776	4	72212152	72237776	-19.5862	32.526	17.289	25.4222	5.836
Chr4:75425269-75452594	4	75425269	75452594	-18.3965	29.843	9.51968	18.3965	0
Chr4:76179771-76199044	4	76179771	76199044	-9.07131	17.4469	17.9534	9.07131	0
Chr4:78337336-78361923	4	78337336	78361923	-6.45398	21.351	17.9267	6.45398	0
Chr4:78935660-78961897	4	78935660	78961897	-21.997	43.7057	16.5471	25.2876	3.29057
Chr4:79044381-79071347	4	79044381	79071347	-20.1985	22.6613	26.4498	26.2737	6.07527
Chr4:79346307-79370120	4	79346307	79370120	-26.0971	44.9903	34.0057	36.6859	10.5888
Chr4:79577313-79596836	4	79577313	79596836	-17.364	35.0037	33.5888	20.0632	2.69928
Chr4:80114879-80138852	4	80114879	80138852	-15.613	25.3403	13.9642	24.0081	8.39506
Chr4:80664278-80686111	4	80664278	80686111	-8.41755	25.3272	20.203	9.27225	0.854701
Chr4:81201643-81218144	4	81201643	81218144	-13.9852	18.4868	25.5767	15.6801	1.69492
Chr4:84460103-84471339	4	84460103	84471339	-24.6896	63.984	61.7581	52.7291	28.0395
Chr4:84759725-84769494	4	84759725	84769494	-7.32428	27.7229	10.1739	7.32428	0
Chr4:84898010-84915998	4	84898010	84915998	-22.4617	80.7147	79.0072	75.825	53.3633
Chr4:85596263-85615220	4	85596263	85615220	-20.9014	29.233	16.5687	23.3579	2.45643
Chr4:85666543-85686278	4	85666543	85686278	-14.0839	18.3929	13.4596	14.3017	0.217865
Chr4:85810746-85828860	4	85810746	85828860	-13.6927	18.7698	17.2404	15.0816	1.38889
Chr4:86993540-87008773	4	86993540	87008773	-31.0523	65.8906	46.3608	56.3108	25.2585
Chr4:87467156-87476967	4	87467156	87476967	-8.10435	15.519	16.1174	8.10435	0
Chr4:89137436-89142136	4	89137436	89142136	-33.0695	28.653	10.2142	37.5046	4.43518
Chr4:89142154-89151328	4	89142154	89151328	-41.7005	80.5208	58.3202	80.2483	38.5478
Chr4:89158408-89167394	4	89158408	89167394	-18.286	95.7331	83.188	93.0203	74.7344
Chr4:90797657-90828631	4	90797657	90828631	-16.4912	26.1533	11.5751	18.5566	2.06541
Chr4:92253572-92275364	4	92253572	92275364	-21.8225	34.0627	21.6482	23.0571	1.23457
Chr4:92522385-92538510	4	92522385	92538510	-19.1812	39.4335	37.6059	28.1909	9.00971
Chr4:93556302-93579518	4	93556302	93579518	-6.57954	24.0476	16.3621	6.57954	0
Chr4:94330977-94350109	4	94330977	94350109	-12.1107	32.5933	11.54	14.1905	2.07977
Chr4:94470727-94481245	4	94470727	94481245	-53.3447	74.0195	47.7241	78.4405	25.0958
Chr4:96378994-96389531	4	96378994	96389531	-28.0391	68.6993	46.9112	65.7302	37.6911
Chr4:96947821-96952595	4	96947821	96952595	-32.9117	79.4879	83.8689	84.7666	51.8549
Chr4:99798248-99813851	4	99798248	99813851	-39.0288	90.0473	69.6015	82.9462	43.9174
Chr4:99933749-99941457	4	99933749	99941457	-38.5529	80.619	31.1033	68.2337	29.6807
Chr4:99941495-99951648	4	99941495	99951648	-43.5245	91.9966	34.8707	85.7249	42.2004
Chr4:99951697-99960398	4	99951697	99960398	-41.0348	70.1201	32.5531	77.6486	36.6138
Chr4:99960432-99968722	4	99960432	99968722	-33.0866	92.7601	53.7051	93.2953	60.2088
Chr4:99968954-99978934	4	99968954	99978934	-34.3881	91.1159	53.2667	92.5379	58.1498
Chr4:99978944-99986618	4	99978944	99986618	-47.3801	93.3944	53.2627	92.2439	44.8638
Chr4:102086484-102088936	4	102086484	102088936	-22.6884	69.7115	71.3942	94.8519	72.1635
Chr4:103119493-103124370	4	103119493	103124370	-38.0646	58.7357	27.5284	78.0023	39.9377
Chr4:105585005-105599075	4	105585005	105599075	-14.097	30.2374	39.8454	16.1485	2.05145
Chr4:105636928-105650843	4	105636928	105650843	-13.8138	27.2447	16.4525	15.4741	1.66032
Chr4:106593238-106601025	4	106593238	106601025	-5.72044	18.9021	9.93523	6.37403	0.653595
Chr4:106700358-106707820	4	106700358	106707820	-41.765	70.2485	52.5562	59.7533	17.9884
Chr4:106707969-106714677	4	106707969	106714677	-22.4736	38.184	33.7313	30.0127	7.53916
Chr4:106715281-106724509	4	106715281	106724509	-26.6503	59.3608	60.2149	54.3884	27.7381
Chr4:106724522-106736732	4	106724522	106736732	-20.3573	35.1496	33.5583	26.5081	6.15079
Chr4:107840435-107846235	4	107840435	107846235	-7.53537	21.0715	17.7372	8.57703	1.04167
Chr4:108030520-108032145	4	108030520	108032145	-5.00861	2.3858	6.54914	5.39175	0.383142
Chr4:108516986-108539327	4	108516986	108539327	-46.1278	87.88	75.5357	86.6528	40.525
Chr4:109489945-109501566	4	109489945	109501566	-21.5193	39.448	37.714	28.2992	6.77994
Chr4:109501820-109522869	4	109501820	109522869	-27.2824	88.4875	79.0953	84.9841	57.7017
Chr4:112590503-112616321	4	112590503	112616321	-22.7438	47.6112	36.3993	38.5498	15.806
Chr4:116805541-116808661	4	116805541	116808661	-51.4387	86.2699	61.2131	85.9675	34.5287
Chr4:116825604-116832592	4	116825604	116832592	-33.2961	71.2129	44.0306	51.7731	18.477
Chr4:117320012-117327375	4	117320012	117327375	-5.58441	21.3363	10.4651	6.50539	0.92098
Chr4:119320938-119333536	4	119320938	119333536	-32.0848	80.3207	69.9907	80.1889	48.1041
Chr4:119333641-119342247	4	119333641	119342247	-39.3043	64.1163	39.6335	53.5749	14.2706
Chr4:119382347-119393185	4	119382347	119393185	-34.1305	63.0085	41.5809	56.889	22.7585
Chr4:123073687-123082784	4	123073687	123082784	-13.4506	30.673	27.0407	16.1497	2.69916
Chr4:123239609-123244267	4	123239609	123244267	-24.8407	43.0532	50.1765	71.7099	46.8692
Chr4:125119525-125124326	4	125119525	125124326	-46.1409	91.3522	71.466	83.199	37.0581
Chr4:125248609-125255728	4	125248609	125255728	-3.61362	18.8721	10.4717	3.95376	0.340136
Chr4:125485427-125490002	4	125485427	125490002	-3.98526	6.98416	3.84838	3.98526	0
Chr4:125543360-125553534	4	125543360	125553534	-11.8046	24.3361	14.7528	14.2535	2.44886
Chr4:125801965-125810852	4	125801965	125810852	-23.3206	24.7438	19.9342	28.5486	5.22803
Chr4:126092616-126098087	4	126092616	126098087	-15.6287	11.759	12.1394	16.278	0.649351
Chr4:126747036-126751847	4	126747036	126751847	-23.6179	92.3745	75.7788	84.0253	60.4074
Chr4:127170099-127178648	4	127170099	127178648	-5.09963	12.3912	5.64847	5.09963	0
Chr4:127386925-127398920	4	127386925	127398920	-47.1735	81.1515	64.5332	73.5366	26.3631
Chr4:127398956-127407459	4	127398956	127407459	-43.7903	83.4341	75.8146	77.2501	33.4598
Chr4:127415294-127421496	4	127415294	127421496	-15.2013	28.9179	13.3196	17.5707	2.36944
Chr4:127421760-127429807	4	127421760	127429807	-30.9601	56.7065	42.2698	40.8648	9.90474
Chr4:127502557-127514498	4	127502557	127514498	-27.1785	46.1947	37.3294	40.1777	12.9992
Chr4:128413250-128421419	4	128413250	128421419	-34.4572	60.3701	41.2785	53.2117	18.7545
Chr4:128569165-128577688	4	128569165	128577688	-27.1474	54.5497	55.1738	53.6863	26.5389
Chr4:128661806-128670598	4	128661806	128670598	-28.944	43.4189	19.6123	49.2172	20.2732
Chr4:128720703-128726735	4	128720703	128726735	-20.3327	37.6094	18.4272	26.1633	5.83053
Chr4:129739650-129742028	4	129739650	129742028	-5.52733	3.54457	1.21196	6.21226	0.684932
Chr4:130056535-130064804	4	130056535	130064804	-17.6332	87.1596	84.5133	92.3749	74.7417
Chr4:130183388-130190075	4	130183388	130190075	-6.41039	22.8883	11.3753	6.50843	0.0980392
Chr4:130975062-130982012	4	130975062	130982012	-40.3566	71.1308	27.2689	67.8002	27.4436
Chr4:132109673-132114391	4	132109673	132114391	-36.7398	64.9205	55.0974	57.8472	21.1073
Chr4:132114437-132122522	4	132114437	132122522	-28.4377	85.8829	82.591	91.7019	63.2642
Chr4:132135748-132143546	4	132135748	132143546	-24.605	51.653	48.8813	44.5693	19.9644
Chr4:132492601-132497500	4	132492601	132497500	-31.8112	86.5895	57.1578	78.8298	47.0185
Chr4:132497546-132503434	4	132497546	132503434	-37.4133	85.7045	50.7712	72.8954	35.4822
Chr4:133508370-133517307	4	133508370	133517307	-14.5255	30.798	24.2301	21.9422	7.41666
Chr4:133813607-133814407	4	133813607	133814407	-3.78631	1.37681	1.30709	3.78631	0
Chr4:133902478-133910358	4	133902478	133910358	-12.5858	25.8442	13.8779	14.4739	1.88816
Chr4:134088916-134095116	4	134088916	134095116	-27.1959	54.9163	27.1379	43.1826	15.9867
Chr4:134237998-134244388	4	134237998	134244388	-25.8188	39.8523	31.1423	35.2635	9.44463
Chr4:134244399-134247357	4	134244399	134247357	-9.361	11.0097	6.0675	10.3526	0.991553
Chr4:134340253-134343966	4	134340253	134343966	-4.68059	4.92903	3.83118	5.22703	0.546448
Chr4:134343971-134350020	4	134343971	134350020	-44.9292	59.8168	44.4388	55.9548	11.0257
Chr4:134691952-134700148	4	134691952	134700148	-22.8781	45.4956	21.9038	29.6904	6.81232
Chr4:134700269-134703606	4	134700269	134703606	-6.74957	8.1605	10.6424	7.59754	0.847972
Chr4:134739941-134745829	4	134739941	134745829	-22.34	88.3495	79.2909	89.9915	67.6515
Chr4:134755688-134761594	4	134755688	134761594	-43.4417	68.5253	68.5646	70.929	27.4873
Chr4:135273057-135278816	4	135273057	135278816	-22.1412	37.833	24.9382	24.619	2.47779
Chr4:135352436-135353324	4	135352436	135353324	-3.52829	3.32296	3.24646	3.61578	0.0874891
Chr4:135447556-135453604	4	135447556	135453604	-21.5012	33.7127	25.5777	27.6902	6.189
Chr4:135508342-135512101	4	135508342	135512101	-37.1676	69.009	51.8548	67.1749	30.0073
Chr4:135639739-135647812	4	135639739	135647812	-5.45757	12.7649	17.8609	5.83211	0.374532
Chr4:135659141-135666584	4	135659141	135666584	-24.7512	44.197	33.286	44.3966	19.6454
Chr4:135705995-135712472	4	135705995	135712472	-9.76214	22.5396	14.8132	13.1773	3.41514
Chr4:137038338-137044713	4	137038338	137044713	-38.4984	69.5254	52.8696	71.9065	33.4081
Chr4:137404403-137416906	4	137404403	137416906	-5.71025	22.5686	15.0262	5.71025	0
Chr4:138250504-138254425	4	138250504	138254425	-7.01539	11.3996	5.42954	9.03374	2.01835
Chr4:139130973-139138567	4	139130973	139138567	-18.1933	27.5802	18.4446	29.3723	11.1791
Chr4:140109853-140116282	4	140109853	140116282	-8.52598	23.8553	17.4038	10.1603	1.63431
Chr4:140116411-140124949	4	140116411	140124949	-13.7031	24.3565	12.6279	19.2242	5.52112
Chr4:140512911-140518504	4	140512911	140518504	-27.3502	85.2869	76.5862	81.3754	54.0252
Chr4:140518618-140525628	4	140518618	140525628	-35.6208	85.8338	76.9823	88.3611	52.7404
Chr4:140525637-140532308	4	140525637	140532308	-55.9189	80.7334	65.6333	82.0412	26.1223
Chr4:140532316-140538050	4	140532316	140538050	-29.7859	88.3296	86.76	93.877	64.0911
Chr4:140538075-140543821	4	140538075	140543821	-45.8884	86.3196	71.1926	81.0332	35.1448
Chr4:140543845-140551048	4	140543845	140551048	-35.4283	70.0067	66.6968	63.2489	27.8206
Chr4:140551184-140555933	4	140551184	140555933	-65.893	87.9928	74.21	84.5864	18.6934
Chr4:140555937-140563470	4	140555937	140563470	-54.086	90.0344	74.4001	86.1608	32.0748
Chr4:140563487-140568898	4	140563487	140568898	-39.2613	92.2619	83.4836	92.5111	53.2499
Chr4:140568954-140574140	4	140568954	140574140	-59.7937	92.4388	83.8626	93.5143	33.7206
Chr4:140574190-140579375	4	140574190	140579375	-43.0183	92.1282	85.2049	92.2568	49.2385
Chr4:140579398-140583498	4	140579398	140583498	-56.0408	89.8652	81.0119	85.5029	29.4622
Chr4:140583646-140590740	4	140583646	140590740	-47.8591	89.8948	77.5935	91.2495	43.3904
Chr4:140590749-140596495	4	140590749	140596495	-60.5045	86.7301	82.7987	87.6128	27.1084
Chr4:140596504-140604034	4	140596504	140604034	-60.4154	91.3939	81.0509	93.001	32.5856
Chr4:140604074-140610938	4	140604074	140610938	-34.3521	94.2359	86.9516	93.3373	58.9852
Chr4:140611019-140616687	4	140611019	140616687	-57.5599	81.7201	52.605	70.4307	12.8708
Chr4:140616714-140623825	4	140616714	140623825	-53.612	67.8543	44.1357	60.219	6.60703
Chr4:140624000-140630922	4	140624000	140630922	-50.5887	89.2108	73.9625	85.8239	35.2353
Chr4:140630940-140637456	4	140630940	140637456	-54.4822	84.6571	78.869	93.7226	39.2404
Chr4:140637506-140643204	4	140637506	140643204	-65.9474	88.6437	64.0222	93.2433	27.2959
Chr4:140643362-140648761	4	140643362	140648761	-32.7899	44.8153	39.2837	45.64	12.8501
Chr4:140655248-140661383	4	140655248	140661383	-12.2152	19.3803	19.6027	14.7662	2.55101
Chr4:140800882-140807709	4	140800882	140807709	-3.12391	12.7663	13.3286	3.12391	0
Chr4:141211760-141218086	4	141211760	141218086	-16.8523	25.6948	15.364	22.2311	5.37879
Chr4:141218151-141224532	4	141218151	141224532	-37.958	58.9757	12.8116	46.2648	8.30688
Chr4:141532298-141536808	4	141532298	141536808	-30.4196	34.268	41.9377	52.2645	21.8449
Chr4:141575395-141581200	4	141575395	141581200	-5.48761	21.6547	19.6619	6.7839	1.2963
Chr4:141817855-141823931	4	141817855	141823931	-47.8798	84.7787	52.3843	77.2769	29.3971
Chr4:141909798-141916465	4	141909798	141916465	-38.0749	69.6097	36.9818	50.2234	12.1485
Chr4:141971309-141978196	4	141971309	141978196	-38.2833	84.1529	57.204	80.7349	42.4516
Chr4:141978209-141985169	4	141978209	141985169	-29.7109	86.026	49.624	76.1858	46.4749
Chr4:141985201-141992012	4	141985201	141992012	-27.9412	85.3474	64.3205	85.333	57.3918
Chr4:141992053-141999090	4	141992053	141999090	-33.6462	51.2173	29.4232	41.8367	8.19056
Chr4:142004752-142010049	4	142004752	142010049	-22.2262	43.9804	23.8577	25.3271	3.10096
Chr4:142020146-142028450	4	142020146	142028450	-17.5196	33.6898	23.4709	24.9347	7.41507
Chr4:142685175-142695000	4	142685175	142695000	-40.1078	86.9759	71.7503	87.3492	47.2413
Chr4:142716293-142728639	4	142716293	142728639	-29.6141	52.7506	37.628	44.9541	15.3399
Chr4:144896037-144909560	4	144896037	144909560	-27.2041	73.9249	69.6667	77.6975	50.4935
Chr4:144909645-144920877	4	144909645	144920877	-18.9985	92.7087	85.5003	90.5303	71.5318
Chr4:147904590-147909932	4	147904590	147909932	-24.4538	33.441	13.6831	32.6698	8.216
Chr4:147910006-147916594	4	147910006	147916594	-62.4914	92.5327	49.6782	86.5514	24.0599
Chr4:147916620-147922142	4	147916620	147922142	-13.3583	27.8953	18.6404	16.427	3.06876
Chr4:147922298-147927538	4	147922298	147927538	-43.8381	76.6826	33.6344	58.3751	14.537
Chr4:147927604-147933473	4	147927604	147933473	-46.6012	67.8959	39.3978	66.874	20.2728
Chr4:148102687-148109869	4	148102687	148109869	-24.5666	85.6259	76.0419	86.6054	62.0388
Chr4:148146015-148151607	4	148146015	148151607	-35.3205	67.8496	56.1682	59.4115	24.0911
Chr4:148217517-148223710	4	148217517	148223710	-4.86143	8.84788	8.76115	5.46652	0.605091
Chr4:148670692-148677081	4	148670692	148677081	-28.3425	49.3785	29.5591	36.0316	7.6891
Chr4:148743306-148748651	4	148743306	148748651	-4.03527	14.2269	10.6711	4.03527	0
Chr4:148938769-148942983	4	148938769	148942983	-23.5991	48.2203	31.8066	38.2546	14.6555
Chr4:149587764-149595220	4	149587764	149595220	-35.4844	52.5013	53.624	51.5878	16.1034
Chr4:149595376-149603072	4	149595376	149603072	-25.4241	88.6748	81.2728	88.1444	62.7203
Chr4:149603080-149608617	4	149603080	149608617	-38.2378	46.3398	38.8624	43.5274	5.28964
Chr4:149619621-149627554	4	149619621	149627554	-26.3358	90.8304	93.0378	93.5629	67.2271
Chr4:149627562-149631648	4	149627562	149631648	-14.1645	90.1999	92.677	94.7424	80.578
Chr4:149642979-149646865	4	149642979	149646865	-33.7672	93.1693	82.6048	77.5824	43.8152
Chr4:149895883-149901620	4	149895883	149901620	-44.3743	68.9867	32.3162	64.6056	20.2313
Chr4:149902029-149906966	4	149902029	149906966	-42.914	76.7988	40.2604	72.4438	29.5298
Chr4:149906986-149913106	4	149906986	149913106	-26.9472	82.5505	49.8674	69.6541	42.7069
Chr4:149913158-149919426	4	149913158	149919426	-27.9825	54.6332	29.1598	46.9524	18.9699
Chr4:149931832-149938778	4	149931832	149938778	-38.2081	71.023	42.3932	65.8716	27.6635
Chr4:149938784-149944940	4	149938784	149944940	-30.2355	60.4004	16.8517	46.7181	16.4827
Chr4:149944980-149949932	4	149944980	149949932	-17.0453	25.53	17.3689	20.8988	3.85348
Chr4:149950003-149954632	4	149950003	149954632	-16.2826	19.3353	6.97143	18.5706	2.28802
Chr4:150115085-150120089	4	150115085	150120089	-18.3718	33.3232	14.15	21.7997	3.42786
Chr4:150120093-150126850	4	150120093	150126850	-50.656	71.3471	38.1218	57.4939	6.83792
Chr4:150126871-150133076	4	150126871	150133076	-32.9093	48.805	24.5495	38.543	5.63369
Chr4:150365822-150372277	4	150365822	150372277	-15.0502	14.4156	15.5547	20.3788	5.32864
Chr4:150707596-150714195	4	150707596	150714195	-4.41027	13.9752	8.60485	4.69763	0.287356
Chr4:150744219-150751566	4	150744219	150751566	-8.39219	18.4055	9.57856	9.38722	0.995025
Chr4:150909646-150913813	4	150909646	150913813	-15.0777	12.6947	9.80891	21.219	6.14126
Chr4:151672488-151680425	4	151672488	151680425	-6.45191	22.775	19.4094	8.26282	1.81091
Chr4:151949667-151955229	4	151949667	151955229	-60.2307	84.8262	86.0675	80.3807	20.15
Chr4:151955565-151962145	4	151955565	151962145	-44.3462	73.9129	68.0779	68.663	24.3168
Chr4:152023886-152027648	4	152023886	152027648	-19.9068	29.3045	25.9072	38.9475	19.0407
Chr4:152094066-152099464	4	152094066	152099464	-32.5396	89.6256	77.65	89.2041	56.6644
Chr4:152099517-152105579	4	152099517	152105579	-33.4004	88.3038	84.4429	85.9694	52.5689
Chr4:152105641-152108847	4	152105641	152108847	-54.6652	82.3054	80.4324	87.2519	32.5867
Chr4:152133027-152138877	4	152133027	152138877	-21.7713	33.5078	9.05366	27.6925	5.92113
Chr4:152161861-152167821	4	152161861	152167821	-30.8801	57.3518	41.3332	54.9274	24.0473
Chr4:152173855-152177941	4	152173855	152177941	-13.6891	13.8524	10.42	17.7926	4.10348
Chr4:152316317-152322378	4	152316317	152322378	-58.6739	67.6629	46.7269	75.3583	16.6844
Chr4:152483453-152488927	4	152483453	152488927	-22.433	93.8223	87.5243	91.4831	69.0501
Chr4:152488934-152492336	4	152488934	152492336	-36.3856	85.8987	70.2345	85.8333	49.4477
Chr4:152492341-152495959	4	152492341	152495959	-37.3087	68.2176	51.6125	63.8016	26.4929
Chr4:152496033-152500968	4	152496033	152500968	-23.7002	89.7784	83.2746	91.8886	68.1884
Chr4:152521245-152527282	4	152521245	152527282	-28.4125	91.6674	76.7004	81.3296	52.9171
Chr4:152527486-152534010	4	152527486	152534010	-30.5195	76.0064	66.381	77.9367	47.4172
Chr4:152541950-152546055	4	152541950	152546055	-15.7709	29.6906	33.1998	23.9135	8.14266
Chr4:152546070-152549001	4	152546070	152549001	-32.6288	59.9003	34.4342	50.1988	17.57
Chr4:152549036-152553530	4	152549036	152553530	-37.3876	72.7632	50.065	67.33	29.9424
Chr4:152553794-152558643	4	152553794	152558643	-28.0358	90.1072	84.1834	88.7667	60.7309
Chr4:152656981-152665298	4	152656981	152665298	-31.4794	70.6306	45.863	70.8368	39.3574
Chr4:154413492-154421634	4	154413492	154421634	-22.6339	48.0093	39.2301	39.9657	17.3317
Chr4:155481812-155491047	4	155481812	155491047	-12.8758	27.1135	12.3495	17.7204	4.84461
Chr4:155496005-155506087	4	155496005	155506087	-42.4464	74.4588	60.1838	69.0749	26.6285
Chr4:155506147-155519994	4	155506147	155519994	-23.8496	85.225	89.258	88.4313	64.5818
Chr4:155520042-155532872	4	155520042	155532872	-26.6904	87.6559	89.6253	93.9738	67.2834
Chr4:155763970-155770430	4	155763970	155770430	-21.8091	29.1174	18.4142	28.9037	7.09459
Chr4:155837641-155841726	4	155837641	155841726	-14.1053	13.8549	10.9947	16.0759	1.97063
Chr4:156163268-156170749	4	156163268	156170749	-14.0574	93.4051	93.0976	93.3764	79.319
Chr4:156185375-156190955	4	156185375	156190955	-20.1511	87.4201	89.5872	93.7321	73.581
Chr4:156217935-156223942	4	156217935	156223942	-24.7755	71.6523	66.4613	72.5475	47.7721
Chr4:156224138-156229966	4	156224138	156229966	-32.4516	70.502	61.1519	74.8537	42.402
Chr5:4345046-4358632	5	4345046	4358632	-23.4653	33.3601	32.3276	39.5468	16.0815
Chr5:5366250-5373868	5	5366250	5373868	-33.8957	64.9806	52.0779	59.4742	25.5785
Chr5:9882850-9908270	5	9882850	9908270	-20.6592	40.0482	22.404	25.846	5.18676
Chr5:13443524-13464990	5	13443524	13464990	-33.8295	56.1542	46.4324	48.2619	14.4324
Chr5:13465785-13480728	5	13465785	13480728	-35.3672	39.7646	24.6162	41.5826	6.21549
Chr5:13594965-13610665	5	13594965	13610665	-29.4391	60.2141	27.2028	36.2043	6.76519
Chr5:19762760-19783894	5	19762760	19783894	-33.9825	69.3116	57.4643	72.3424	38.3599
Chr5:20270887-20287455	5	20270887	20287455	-30.1826	80.5439	75.4921	77.966	47.7834
Chr5:20333188-20347905	5	20333188	20347905	-34.6313	62.2317	44.8063	55.8929	21.2616
Chr5:20375236-20387699	5	20375236	20387699	-38.9297	84.8713	71.2584	72.4788	33.5491
Chr5:24386959-24388757	5	24386959	24388757	-19.9162	22.6515	7.53289	22.2827	2.36647
Chr5:24388786-24394666	5	24388786	24394666	-18.4093	34.3033	24.1344	22.9803	4.57098
Chr5:24533927-24540601	5	24533927	24540601	-8.33958	23.341	16.104	9.37792	1.03834
Chr5:25011149-25018269	5	25011149	25018269	-27.2579	47.228	29.5911	42.0717	14.8138
Chr5:26001466-26008362	5	26001466	26008362	-4.57115	7.23094	6.42928	4.93243	0.361274
Chr5:27191159-27209319	5	27191159	27209319	-30.0036	61.7932	40.0025	59.3974	29.3938
Chr5:27209442-27226355	5	27209442	27226355	-20.865	46.3905	33.0273	29.0372	8.17214
Chr5:27287019-27297904	5	27287019	27297904	-28.225	64.8843	34.9066	45.1656	16.9406
Chr5:28458288-28459874	5	28458288	28459874	-6.5723	1.59677	3.94977	6.72521	0.152905
Chr5:29134706-29150975	5	29134706	29150975	-7.21758	22.4132	13.9679	8.7971	1.57952
Chr5:30739123-30746234	5	30739123	30746234	-26.851	83.911	83.9782	89.0998	62.2488
Chr5:31093152-31094988	5	31093152	31094988	-10.2182	24.3176	4.13097	11.7708	1.55257
Chr5:31136084-31138200	5	31136084	31138200	-3.10674	5.93749	1.328	3.10674	0
Chr5:31192693-31194800	5	31192693	31194800	-2.21992	3.03454	1.74445	2.21992	0
Chr5:31588933-31596835	5	31588933	31596835	-9.95653	21.3397	20.1379	10.5626	0.606061
Chr5:31763727-31781386	5	31763727	31781386	-29.2951	85.1145	72.3242	80.6741	51.379
Chr5:31781399-31794310	5	31781399	31794310	-25.9319	57.8851	31.4735	49.3448	23.4129
Chr5:31806970-31820523	5	31806970	31820523	-32.4797	81.52	77.4382	86.1472	53.6674
Chr5:31820564-31836267	5	31820564	31836267	-36.6546	83.9583	67.1373	84.5713	47.9167
Chr5:31887518-31905946	5	31887518	31905946	-38.6219	84.7538	69.129	83.4155	44.7937
Chr5:31905989-31918795	5	31905989	31918795	-29.5105	84.8888	56.6017	79.5069	49.9964
Chr5:31931425-31947772	5	31931425	31947772	-42.7355	75.1142	34.7077	67.6889	24.9534
Chr5:32009676-32022180	5	32009676	32022180	-32.8165	82.8238	74.6413	83.8011	50.9846
Chr5:32022187-32038072	5	32022187	32038072	-30.0901	83.8646	60.7968	78.043	47.953
Chr5:32689563-32705068	5	32689563	32705068	-31.4651	60.9101	52.1995	54.5226	23.0575
Chr5:33977230-33983510	5	33977230	33983510	-12.1169	13.6325	8.8384	18.0165	5.89956
Chr5:34964950-34972959	5	34964950	34972959	-48.2884	88.8577	75.5644	91.5769	43.2885
Chr5:34973057-34982953	5	34973057	34982953	-44.0515	87.1915	70.0135	89.5786	45.5271
Chr5:35687166-35695510	5	35687166	35695510	-28.4298	59.0259	18.6187	49.7764	21.3465
Chr5:35695548-35703325	5	35695548	35703325	-39.0329	80.9281	51.4971	78.3056	39.2727
Chr5:35703340-35709648	5	35703340	35709648	-16.2127	95.2571	82.2491	94.5303	78.3176
Chr5:35718677-35728766	5	35718677	35728766	-24.2489	75.1297	64.4389	72.184	47.935
Chr5:35728785-35739039	5	35728785	35739039	-28.7112	54.551	24.9325	48.8573	20.1461
Chr5:36403260-36417463	5	36403260	36417463	-44.754	75.2894	36.2561	59.1571	14.4032
Chr5:36417470-36428194	5	36417470	36428194	-46.5737	75.4139	31.3571	58.601	12.0273
Chr5:36428279-36440063	5	36428279	36440063	-31.425	69.6377	53.6784	60.1398	28.7148
Chr5:38475691-38482062	5	38475691	38482062	-22.5391	51.0912	30.4403	42.6748	20.1357
Chr5:38716993-38732010	5	38716993	38732010	-11.721	25.8523	19.2471	12.4533	0.732254
Chr5:45363630-45382071	5	45363630	45382071	-6.08464	17.7943	17.7648	6.08464	0
Chr5:45646505-45659657	5	45646505	45659657	-21.0238	83.0648	70.1702	80.4129	59.3891
Chr5:49488360-49509997	5	49488360	49509997	-9.57494	25.9433	24.5508	10.3879	0.813008
Chr5:50289881-50310038	5	50289881	50310038	-19.4811	44.2489	21.937	25.1528	5.6717
Chr5:50456829-50479973	5	50456829	50479973	-12.0699	21.4384	10.4646	14.0578	1.98786
Chr5:51785520-51799131	5	51785520	51799131	-5.67133	17.582	20.9147	5.67133	0
Chr5:52016254-52025807	5	52016254	52025807	-8.8345	30.4992	18.9742	9.90292	1.06842
Chr5:52630496-52637959	5	52630496	52637959	-8.92445	18.5316	22.8427	9.48942	0.564972
Chr5:53149190-53156642	5	53149190	53156642	-31.0889	39.8579	12.386	41.786	10.6971
Chr5:53172321-53180223	5	53172321	53180223	-13.1717	31.3913	15.5024	17.4761	4.30444
Chr5:54615064-54638214	5	54615064	54638214	-11.199	28.9638	16.2407	11.199	0
Chr5:56307551-56335654	5	56307551	56335654	-15.8802	20.4837	28.8253	17.0707	1.19048
Chr5:56592543-56624001	5	56592543	56624001	-21.7042	30.2348	14.4246	28.945	7.24079
Chr5:56849768-56875873	5	56849768	56875873	-19.5787	52.1994	27.2728	27.7115	8.13287
Chr5:57462604-57484056	5	57462604	57484056	-16.0648	28.9113	32.5021	18.141	2.07625
Chr5:58133100-58159200	5	58133100	58159200	-14.4556	30.1042	22.1946	14.7824	0.326797
Chr5:60231450-60252962	5	60231450	60252962	-9.43843	19.5189	15.6602	9.43843	0
Chr5:61433133-61461625	5	61433133	61461625	-18.8204	38.3214	11.1152	20.0109	1.19048
Chr5:61559456-61595551	5	61559456	61595551	-15.1741	32.284	23.7762	18.3884	3.21429
Chr5:62552898-62570086	5	62552898	62570086	-8.02073	26.0586	13.5146	9.0624	1.04167
Chr5:62822252-62847450	5	62822252	62847450	-15.0202	43.4053	15.8166	15.6491	0.628931
Chr5:63464525-63490472	5	63464525	63490472	-11.3756	29.4298	18.4185	12.2765	0.900901
Chr5:64094158-64102862	5	64094158	64102862	-27.7633	91.9786	86.1581	85.0765	57.3132
Chr5:64102871-64109470	5	64102871	64109470	-36.5902	88.962	84.4151	84.7744	48.1842
Chr5:64126374-64137258	5	64126374	64137258	-30.6262	50.5027	29.7153	36.6656	6.03937
Chr5:64548478-64559979	5	64548478	64559979	-24.8457	34.4132	39.5566	30.2816	5.43582
Chr5:66044491-66053112	5	66044491	66053112	-35.3033	88.8675	79.0079	78.1471	42.8438
Chr5:66676250-66678904	5	66676250	66678904	-6.15331	7.66313	7.45732	6.80717	0.653861
Chr5:66823948-66832870	5	66823948	66832870	-7.47349	15.1656	16.0644	8.34073	0.867247
Chr5:66863968-66874023	5	66863968	66874023	-7.8297	16.7973	11.079	8.53568	0.705985
Chr5:69451115-69468286	5	69451115	69468286	-7.65702	17.9408	12.3934	8.06353	0.406504
Chr5:70706844-70734437	5	70706844	70734437	-21.7869	25.8703	18.6654	24.026	2.23906
Chr5:71345358-71360285	5	71345358	71360285	-16.4501	31.557	13.4151	20.7979	4.34783
Chr5:71701173-71721382	5	71701173	71721382	-8.93833	17.8381	11.1932	8.93833	0
Chr5:71879306-71900452	5	71879306	71900452	-42.5791	68.6992	30.2783	75.1897	32.6105
Chr5:72127882-72138192	5	72127882	72138192	-5.6483	27.2347	13.3597	5.95694	0.308642
Chr5:72367915-72377333	5	72367915	72377333	-28.9409	44.6645	10.3171	33.2143	4.27337
Chr5:72377624-72387721	5	72377624	72387721	-18.943	35.5909	21.4175	25.8478	6.90481
Chr5:72387767-72399951	5	72387767	72399951	-29.4892	59.7578	34.055	38.3801	8.89087
Chr5:72399994-72408394	5	72399994	72408394	-22.4151	49.2046	22.9634	28.6225	6.20744
Chr5:72408486-72420124	5	72408486	72420124	-38.0476	59.8326	27.4167	45.3357	7.28812
Chr5:72420150-72434332	5	72420150	72434332	-37.8922	65.6863	36.1886	48.3324	10.4402
Chr5:72434407-72446365	5	72434407	72446365	-27.6901	42.7927	31.7692	34.2375	6.54734
Chr5:72446380-72455423	5	72446380	72455423	-38.0695	64.4347	28.6669	42.6744	4.60493
Chr5:72455538-72467355	5	72455538	72467355	-45.0832	58.4534	21.6607	50.866	5.78285
Chr5:72467524-72481100	5	72467524	72481100	-22.1403	28.7996	18.7115	24.3999	2.25957
Chr5:72587218-72598023	5	72587218	72598023	-11.7313	23.8943	20.7409	16.0884	4.35712
Chr5:72745440-72755861	5	72745440	72755861	-6.77553	13.4911	10.4029	7.52614	0.750613
Chr5:73003902-73007643	5	73003902	73007643	-7.93827	15.9852	4.82764	8.80565	0.867381
Chr5:73342953-73349768	5	73342953	73349768	-4.64992	18.985	17.5432	4.64992	0
Chr5:73729068-73737441	5	73729068	73737441	-8.58739	24.2763	17.9551	8.75833	0.17094
Chr5:74880633-74889242	5	74880633	74889242	-5.50251	16.3648	18.3613	5.50251	0
Chr5:75309947-75326790	5	75309947	75326790	-8.39002	26.2787	18.9176	8.39002	0
Chr5:76856660-76858060	5	76856660	76858060	-4.61151	5.50859	6.46491	4.61151	0
Chr5:76863770-76869346	5	76863770	76869346	-43.9431	72.9819	40.5504	56.3718	12.4288
Chr5:76923182-76928818	5	76923182	76928818	-31.6991	84.1698	78.3363	80.2217	48.5227
Chr5:77665197-77677654	5	77665197	77677654	-10.2789	10.4368	16.3946	11.2568	0.977891
Chr5:78547747-78573465	5	78547747	78573465	-22.1109	59.4269	40.6384	34.216	12.1051
Chr5:79614277-79642727	5	79614277	79642727	-12.2766	19.1501	22.7764	14.0969	1.82033
Chr5:80576168-80593045	5	80576168	80593045	-41.4471	51.4644	39.2519	57.3903	15.9432
Chr5:80708686-80740259	5	80708686	80740259	-21.0972	41.3155	29.1698	26.5148	5.41764
Chr5:82065111-82081173	5	82065111	82081173	-12.3017	32.5706	14.6566	16.8534	4.55171
Chr5:82273401-82294379	5	82273401	82294379	-12.8432	26.4301	9.34845	14.1667	1.32353
Chr5:83396120-83422954	5	83396120	83422954	-6.43751	19.9484	14.4118	6.43751	0
Chr5:84003693-84027872	5	84003693	84027872	-18.2921	35.2202	18.4654	21.6943	3.40224
Chr5:84096639-84116314	5	84096639	84116314	-18.9688	28.6207	20.7452	22.6966	3.72782
Chr5:84195418-84216847	5	84195418	84216847	-25.3938	46.1746	21.5027	29.5605	4.16667
Chr5:85139205-85166571	5	85139205	85166571	-14.6344	42.1576	22.9986	20.0067	5.37231
Chr5:85499019-85514404	5	85499019	85514404	-27.5217	60.552	51.8453	50.7105	23.1888
Chr5:86804495-86812103	5	86804495	86812103	-24.7875	10.5177	25.9797	42.2435	17.456
Chr5:86893768-86916257	5	86893768	86916257	-16.3641	32.0691	19.0879	18.6055	2.24138
Chr5:87752746-87779289	5	87752746	87779289	-12.7905	30.5059	13.6268	15.116	2.32558
Chr5:87992896-88022720	5	87992896	88022720	-21.9193	27.8946	15.0125	28.0304	6.11111
Chr5:88061739-88095890	5	88061739	88095890	-19.5421	45.8405	26.3913	25.3567	5.81459
Chr5:88178031-88199148	5	88178031	88199148	-27.6278	61.9312	26.0714	38.4723	10.8445
Chr5:88554687-88563277	5	88554687	88563277	-30.7102	45.4148	25.3805	45.3803	14.67
Chr5:88574145-88584768	5	88574145	88584768	-12.0954	24.6621	22.9696	15.0204	2.92498
Chr5:88642454-88650014	5	88642454	88650014	-29.7903	50.9711	49.5874	51.8679	22.0776
Chr5:88981693-88991491	5	88981693	88991491	-5.78477	17.8427	13.3016	5.78477	0
Chr5:90523026-90536606	5	90523026	90536606	-19.3269	94.3822	87.7209	90.4738	71.1469
Chr5:91364702-91372651	5	91364702	91372651	-4.52524	18.4421	11.027	4.52524	0
Chr5:91519904-91530524	5	91519904	91530524	-9.00771	30.8689	13.3669	9.60295	0.595238
Chr5:92256259-92263740	5	92256259	92263740	-29.4215	88.0091	69.6966	87.7545	58.333
Chr5:92264102-92272302	5	92264102	92272302	-23.6704	90.0202	78.0092	91.951	68.2807
Chr5:92272315-92277827	5	92272315	92277827	-22.8532	43.7078	33.2372	33.6502	10.797
Chr5:96170680-96179594	5	96170680	96179594	-6.51277	20.9315	18.1332	6.51277	0
Chr5:96379202-96389781	5	96379202	96389781	-5.98675	15.6843	10.8067	5.98675	0
Chr5:96438135-96447526	5	96438135	96447526	-34.7719	64.9476	31.2849	57.1465	22.3746
Chr5:96500886-96515095	5	96500886	96515095	-17.5155	35.1715	24.5354	23.012	5.49645
Chr5:96515323-96527924	5	96515323	96527924	-14.5695	25.3293	27.3002	18.5036	3.93416
Chr5:96540198-96551226	5	96540198	96551226	-31.1962	54.7255	30.2246	38.8056	7.60939
Chr5:96551381-96561340	5	96551381	96561340	-29.0405	69.6455	52.5155	65.5119	36.4714
Chr5:96571789-96586782	5	96571789	96586782	-23.627	52.6418	31.4433	33.8779	10.2509
Chr5:96599959-96611807	5	96599959	96611807	-26.4572	61.5235	20.1832	45.8088	19.3516
Chr5:96623862-96633416	5	96623862	96633416	-38.9951	63.1034	24.2307	42.872	3.87693
Chr5:96634102-96643018	5	96634102	96643018	-34.8289	59.0879	27.8303	41.7088	6.87984
Chr5:96643248-96653290	5	96643248	96653290	-34.98	75.6175	35.0208	52.2755	17.2954
Chr5:97719445-97737696	5	97719445	97737696	-13.7596	22.8707	9.83565	15.9151	2.15552
Chr5:99869406-99877907	5	99869406	99877907	-5.71322	13.6891	18.2243	6.34215	0.628931
Chr5:101083980-101092155	5	101083980	101092155	-4.98419	33.2223	21.1229	5.60148	0.617284
Chr5:101326096-101332035	5	101326096	101332035	-4.35353	30.1284	17.9299	4.35353	0
Chr5:102562197-102574560	5	102562197	102574560	-6.37729	14.8697	9.79907	6.37729	0
Chr5:102760012-102769368	5	102760012	102769368	-17.2932	31.9246	14.9287	22.0706	4.77746
Chr5:102778140-102792354	5	102778140	102792354	-18.6613	36.5162	25.7639	28.1439	9.48258
Chr5:104067903-104074374	5	104067903	104074374	-32.1201	61.1895	51.3704	56.5064	24.3864
Chr5:104074380-104080760	5	104074380	104080760	-34.2032	89.5976	70.1022	84.4691	50.2659
Chr5:104080901-104089549	5	104080901	104089549	-34.0792	86.2205	76.5617	83.9312	49.852
Chr5:104089574-104096589	5	104089574	104096589	-43.1821	86.9049	64.4471	88.7222	45.5401
Chr5:104096679-104106973	5	104096679	104106973	-41.5946	73.213	49.1681	55.0799	13.4854
Chr5:104107179-104114029	5	104107179	104114029	-25.661	38.9804	21.7546	29.4791	3.81805
Chr5:105264722-105290090	5	105264722	105290090	-11.5689	22.2766	22.5637	13.0841	1.51515
Chr5:105971213-105977692	5	105971213	105977692	-33.0528	53.0202	48.3762	43.7304	10.6776
Chr5:107143810-107151866	5	107143810	107151866	-41.6065	67.4745	36.0859	62.4974	20.8908
Chr5:107151868-107162207	5	107151868	107162207	-38.1568	62.9935	42.1412	57.7539	19.5971
Chr5:107162266-107171588	5	107162266	107171588	-40.2385	50.7934	45.3449	60.118	19.8795
Chr5:107171712-107183423	5	107171712	107183423	-29.2269	40.5543	20.099	36.2267	6.99983
Chr5:107183618-107192115	5	107183618	107192115	-42.5208	71.7095	29.8816	60.674	18.1532
Chr5:107199586-107207690	5	107199586	107207690	-38.8832	56.4368	27.1122	54.6204	15.7372
Chr5:107207775-107217368	5	107207775	107217368	-51.3716	75.082	40.3049	72.9565	21.5849
Chr5:107217714-107225229	5	107217714	107225229	-51.5442	53.085	23.5009	55.99	4.44588
Chr5:107234329-107244692	5	107234329	107244692	-46.4743	90.6495	62.4003	91.2129	44.7385
Chr5:108500642-108510286	5	108500642	108510286	-26.5066	48.2193	56.9923	38.5923	12.0857
Chr5:108521145-108536496	5	108521145	108536496	-17.6147	38.9664	26.9754	25.9183	8.30361
Chr5:108650562-108658237	5	108650562	108658237	-18.3223	91.2152	87.2817	88.8615	70.5392
Chr5:109516986-109528531	5	109516986	109528531	-27.658	80.8964	71.3796	77.0178	49.3598
Chr5:109528592-109539145	5	109528592	109539145	-33.2908	91.3833	72.666	87.4504	54.1596
Chr5:109834435-109851654	5	109834435	109851654	-27.1262	75.7158	58.9762	64.7636	37.6375
Chr5:110361788-110363528	5	110361788	110363528	-11.1368	11.0151	8.30258	12.9802	1.84344
Chr5:112278732-112284900	5	112278732	112284900	-44.7495	51.5329	27.257	55.0658	10.3162
Chr5:112284937-112291762	5	112284937	112291762	-52.6285	86.8273	64.7589	87.3493	34.7207
Chr5:112291783-112298427	5	112291783	112298427	-36.6636	74.1825	69.1371	75.4632	38.7997
Chr5:113726155-113732393	5	113726155	113732393	-25.6774	46.0564	43.0675	34.8235	9.14615
Chr5:114423545-114428954	5	114423545	114428954	-17.4522	32.3579	24.8205	22.6881	5.23591
Chr5:114429014-114434022	5	114429014	114434022	-31.174	83.2376	77.1839	83.7478	52.5738
Chr5:114453610-114457711	5	114453610	114457711	-40.4212	76.1576	49.0374	73.3182	32.897
Chr5:114874739-114879523	5	114874739	114879523	-23.9562	53.995	45.8121	37.625	13.6689
Chr5:115383927-115391827	5	115383927	115391827	-7.92603	35.0168	19.7996	9.29215	1.36612
Chr5:115398537-115403856	5	115398537	115403856	-5.05305	7.24377	8.86141	5.39319	0.340136
Chr5:115507134-115512534	5	115507134	115512534	-43.607	85.4213	83.8848	91.5624	47.9554
Chr5:115512548-115516340	5	115512548	115516340	-40.8986	68.9331	59.7549	57.7678	16.8691
Chr5:115516359-115520674	5	115516359	115520674	-34.9439	87.1475	87.1629	72.1053	37.1614
Chr5:115534484-115540339	5	115534484	115540339	-47.636	71.3715	63.84	72.4199	24.7839
Chr5:115555707-115559626	5	115555707	115559626	-4.91546	14.3041	5.30171	5.67304	0.757576
Chr5:115732254-115733637	5	115732254	115733637	-8.49826	1.86228	6.45428	8.49826	0
Chr5:116143805-116148414	5	116143805	116148414	-30.8858	60.3258	34.2304	51.1042	20.2185
Chr5:117287321-117292275	5	117287321	117292275	-6.86321	3.3313	5.23713	8.45474	1.59153
Chr5:117414346-117422219	5	117414346	117422219	-19.6014	24.5358	16.9078	24.6448	5.0434
Chr5:117422362-117430919	5	117422362	117430919	-62.1382	63.0867	51.085	80.8551	18.7169
Chr5:117445511-117452263	5	117445511	117452263	-51.7921	62.5863	29.0558	62.2493	10.4572
Chr5:117452589-117458683	5	117452589	117458683	-30.8949	40.6496	22.3594	34.5409	3.64594
Chr5:117458705-117463808	5	117458705	117463808	-33.3718	44.2876	29.6939	38.6138	5.24206
Chr5:117463947-117471817	5	117463947	117471817	-37.7452	49.241	26.1544	45.1375	7.39238
Chr5:117479681-117484263	5	117479681	117484263	-7.64812	37.4453	18.1777	9.9683	2.32018
Chr5:117495100-117500738	5	117495100	117500738	-14.0867	25.732	17.6264	16.5522	2.46543
Chr5:117500776-117507673	5	117500776	117507673	-28.3201	58.7188	57.3905	57.0872	28.7671
Chr5:117525345-117533554	5	117525345	117533554	-24.1572	91.9322	84.8316	91.5142	67.357
Chr5:117533669-117539543	5	117533669	117539543	-36.0763	81.6612	78.1881	91.4588	55.3824
Chr5:117539759-117545703	5	117539759	117545703	-19.5766	39.5655	30.4359	27.9123	8.33567
Chr5:117607290-117616890	5	117607290	117616890	-25.9388	38.4314	32.2195	33.9585	8.01968
[truncated: 3,585 more rows]

## Sheet: DMD clustering
Probe	Ehmt2 Control	Ehmt2 cKO	Ehmt1/2 Control	Ehmt1/2 cDKO	Cluster
[truncated: 1,621 more rows]

## Sheet: README
Supplemental Table S4: DNA methylation (PBAT) analysis
[truncated: 5 more rows]
