# Supplementary material for: Multi-omics analyses demonstrate a critical role for EHMT1 methyltransferase in transcriptional repression during oogenesis
Source: Genome Res. 2023 Jan;33(1):18–31. doi: 10.1101/gr.277046.122 (PMC9977154; doi:10.1101/gr.277046.122)
Supplement: Supplemental Material [file supp_gr.277046.122_Supplemental_Table_S6.xlsx]

## Sheet: ChIP-seq_H3K9me2
Sample	Genotype	% Aligned	% Trimmed	% Duplicates	% GC	Total reads (million)
2_Control_H3K9me2	Control	0.967	0.0135	0.726	0.44	87.4
5_DKO_H3K9me2	Ehmt1/2 cDKO	0.941	0.015	0.783	0.44	34.4
1_G9a-KO_H3K9me2	Ehmt2 cKO	0.936	0.017	0.8355	0.43	65.6
5_DKO_input	Ehmt1/2 cDKO	0.988	0.029	0.402	0.42	63.6
3_G9a-KO_H3K9me2	Ehmt2 cKO	0.931	0.016	0.838	0.43	42.4
2_Control_input	Control	0.986	0.034	0.4465	0.42	51.2
7_DKO_H3K9me2	Ehmt1/2 cDKO	0.952	0.014	0.792	0.435	41
1_G9a-KO_input	Ehmt2 cKO	0.988	0.022	0.3925	0.415	49.8
6_Control_IgG	Control	0.842	0.01	0.4305	0.41	30.4
4_Control_H3K9me2	Control	0.988	0.011	0.5325	0.44	106.4
7_DKO_input	Ehmt1/2 cDKO	0.988	0.017	0.249	0.43	53.4
3_G9a-KO_input	Ehmt2 cKO	0.988	0.023	0.4305	0.42	67.6
8_Control_IgG	Control	0.967	0.011	0.449	0.41	44.4
4_Control_input	Control	0.989	0.0185	0.2555	0.43	59.8
AVERAGE		0.960786	0.0179286	0.540179	0.426429	56.9571

## Sheet: RNA-seq
Sample	Genotype	% Aligned	% Base Pairs Trimmed	% Duplicates	% GC	Total sequences (Millions)
G9a-cKO_GKAO109-4c	Ehmt2 cKO	0.911	0.012	0.374	0.49	2.4
G9a-cKO_GKAO115-4c	Ehmt2 cKO	0.906	0.012	0.346	0.49	1.8
G9a-Control_GKAO115-3g	Ehmt2 control	0.909	0.012	0.381	0.49	1.7
G9a-cKO_GKAO115-4d	Ehmt2 cKO	0.905	0.012	0.415	0.49	2.1
G9a_Control_GKAO109-4d	Ehmt2 control	0.912	0.012	0.383	0.49	1.9
G9a-Control_GKAO109-4b	Ehmt2 control	0.912	0.012	0.343	0.49	1.4
AVERAGE		0.909167	0.012	0.373667	0.49	1.88333
G9a-Glp-cDKO_GKAQ51-1c	Ehmt1/2 cDKO	0.864	0.012	0.361	0.5	1.9
G9a-Glp-cDKO_GKAQ54-1d	Ehmt1/2 cDKO	0.836	0.016	0.716	0.5	1.4
G9a-Glp-Control_GKAQ54-1e	Ehmt1/2 control	0.886	0.012	0.396	0.49	1.6
G9a-Glp-cDKO_GKAQ55-1e	Ehmt1/2 cDKO	0.832	0.012	0.383	0.49	1.9
G9a-Glp-Control_GKAQ57-1f	Ehmt1/2 control	0.884	0.012	0.413	0.49	2.1
G9a-Glp-Control_GKAQ55-1b	Ehmt1/2 control	0.885	0.012	0.424	0.49	2.5
AVERAGE		0.8645	0.0126667	0.448833	0.493333	1.9

## Sheet: PBAT_BS-seq
Sample	Genotype	Total reads	Aligned uniquely	CpG Methylation	CpG count	Total CpGs	% Covered CpGs
GKAQ_Control_45-2e	Ehmt1/2 control	30727751	10523131	0.315	11671070	43735674	26.6855
GKAQ_G9a-Glp-cDKO_46-2m	Ehmt1/2 cDKO	31087643	9994260	0.341	11537355	43735674	26.3797
GKAQ_G9a-Glp-cDKO_51-1f	Ehmt1/2 cDKO	27356975	9417433	0.36	11025707	43735674	25.2099
GKAQ_Control_45-2d	Ehmt1/2 control	27262881	12520498	0.362	14279351	43735674	32.6492
GKAQ_G9a-Glp-cDKO_46-2k	Ehmt1/2 cDKO	25889981	11222007	0.359	13244474	43735674	30.283
GKAQ_Control_52-1h	Ehmt1/2 control	23383473	7654811	0.377	9085536	43735674	20.7737
GKAQ_Control_54-1a	Ehmt1/2 control	22767159	10420720	0.404	12412127	43735674	28.3799
AVERAGE		2.69251e+07	1.02504e+07	0.359714	11893660		27.1944
GKAO_G9a_Control_10-2H	Ehmt2 control	19913749	7071188	0.463	12025464	43735674	27.4958
GKAO_G9a-cKO_10-2G	Ehmt2 cKO	8111883	4160094	0.45	8702125	43735674	19.8971
GKAO_G9a-cKO_10-2F	Ehmt2 cKO	22995205	7710138	0.46	11671498	43735674	26.6864
GKAO_G9a_Control_8-1C	Ehmt2 control	11943499	3738691	0.432	6516775	43735674	14.9004
GKAO_G9a-cKO_10-1	Ehmt2 cKO	12034416	4787086	0.395	11360795	43735674	25.976
GKAO_G9a_Control_10-1	Ehmt2 control	26022853	8010650	0.414	13302576	43735674	30.4158
GKAO_G9a_Control_10-2E	Ehmt2 control	11652048	5137190	0.47	11369149	43735674	25.9951
GKAO_G9a-cKO_8-1H	Ehmt2 cKO	16448782	6382197	0.397	11769795	43735674	26.9112
AVERAGE		1.61403e+07	5.87465e+06	0.435125	1.08398e+07		24.7847

## Sheet: README
Supplemental Table S6: Sequencing read numbers
ChIP-seq_H3K9me2	ChIP-seq sequencing information including sample names, genotypes, % aligned reads, %trimmed reads, % duplicates, % GC content and total read numbers (millions)
RNA-seq	RNA-seq sequencing information including sample names, genotypes, % aligned reads, %trimmed reads, % duplicates, % GC content and total read numbers (millions)
PBAT_BS-seq	PBAT BS-seq sequencing information including sample names, genotypes, total read number, uniquely aligned read number and % methylation (Bismark analysis), CpG count, total number of CpGs in the genome and % covered CpGs
